# Supplementary material
Source: MDPI journal article supplement (https://www.mdpi.com/2304-6740/7/3/28)

# checkCIF/PLATON report

Structure factors have been supplied for datablock(s) VV\_ML83\_III\_0ma\_a

THIS REPORT IS FOR GUIDANCE ONLY. IF USED AS PART OF A REVIEW PROCEDURE FOR PUBLICATION, IT SHOULD NOT REPLACE THE EXPERTISE OF AN EXPERIENCED CRYSTALLOGRAPHIC REFEREE.

No syntax errors found.      CIF dictionary      Interpreting this report

## Datablock: VV\_ML83\_III\_0ma\_a

---

|                 |                                    |                                 |
|-----------------|------------------------------------|---------------------------------|
| Bond precision: | C-C = 0.0163 A                     | Wavelength=0.71073              |
| Cell:           | a=13.9459(8)                       | b=31.1012(19)      c=10.9557(7) |
|                 | alpha=90                           | beta=105.449(2)      gamma=90   |
| Temperature:    | 150 K                              |                                 |
|                 | Calculated                         | Reported                        |
| Volume          | 4580.2(5)                          | 4580.2(5)                       |
| Space group     | P 21/c                             | P 21/c                          |
| Hall group      | -P 2ybc                            | -P 2ybc                         |
| Moiety formula  | C39 H29 Au2 O P2, F6 Sb, 2(C5 H10) | ?                               |
| Sum formula     | C49 H49 Au2 F6 O P2 Sb             | C49 H49 Au2 F6 O P2 Sb          |
| Mr              | 1345.52                            | 1345.50                         |
| Dx,g cm-3       | 1.951                              | 1.951                           |
| Z               | 4                                  | 4                               |
| Mu (mm-1)       | 7.107                              | 7.107                           |
| F000            | 2576.0                             | 2576.0                          |
| F000'           | 2560.11                            |                                 |
| h,k,lmax        | 16,37,13                           | 16,37,13                        |
| Nref            | 8244                               | 8204                            |
| Tmin,Tmax       | 0.390,0.509                        | 0.474,0.745                     |
| Tmin'           | 0.072                              |                                 |

Correction method= # Reported T Limits: Tmin=0.474 Tmax=0.745  
AbsCorr = MULTI-SCAN

Data completeness= 0.995      Theta(max)= 25.188

R(reflections)= 0.0419( 6409)      wR2(reflections)= 0.1088( 8204)

S = 1.083      Npar= 603

---

The following ALERTS were generated. Each ALERT has the format

**test-name\_ALERT\_alert-type\_alert-level.**

Click on the hyperlinks for more details of the test.

### Alert level B

PLAT919\_ALERT\_3\_B Reflection # Likely Affected by the Beamstop ... 1 Check

### Alert level C

PLAT220\_ALERT\_2\_C Non-Solvent Resd 1 C Ueq(max)/Ueq(min) Range 3.4 Ratio  
 PLAT234\_ALERT\_4\_C Large Hirshfeld Difference C34 --C35 . 0.17 Ang.  
 PLAT234\_ALERT\_4\_C Large Hirshfeld Difference Sb1 --F1 . 0.18 Ang.  
 PLAT243\_ALERT\_4\_C High 'Solvent' Ueq as Compared to Neighbors of C44 Check  
 PLAT243\_ALERT\_4\_C High 'Solvent' Ueq as Compared to Neighbors of C49 Check  
 PLAT244\_ALERT\_4\_C Low 'Solvent' Ueq as Compared to Neighbors of C43 Check  
 PLAT244\_ALERT\_4\_C Low 'Solvent' Ueq as Compared to Neighbors of C45 Check  
 PLAT244\_ALERT\_4\_C Low 'Solvent' Ueq as Compared to Neighbors of C48 Check  
 PLAT260\_ALERT\_2\_C Large Average Ueq of Residue Including Sb1 0.086 Check  
 PLAT260\_ALERT\_2\_C Large Average Ueq of Residue Including Sb1' 0.093 Check  
 PLAT260\_ALERT\_2\_C Large Average Ueq of Residue Including C40 0.091 Check  
 PLAT260\_ALERT\_2\_C Large Average Ueq of Residue Including C45 0.119 Check  
 PLAT342\_ALERT\_3\_C Low Bond Precision on C-C Bonds ..... 0.01629 Ang.  
 PLAT360\_ALERT\_2\_C Short C(sp3)-C(sp3) Bond C40 - C44 . 1.43 Ang.  
 PLAT360\_ALERT\_2\_C Short C(sp3)-C(sp3) Bond C45 - C49 . 1.40 Ang.  
 PLAT906\_ALERT\_3\_C Large K Value in the Analysis of Variance ..... 3.553 Check  
 PLAT910\_ALERT\_3\_C Missing # of FCF Reflection(s) Below Theta(Min). 6 Note  
 PLAT911\_ALERT\_3\_C Missing FCF Refl Between Thmin & STh/L= 0.599 33 Report  
 PLAT918\_ALERT\_3\_C Reflection(s) with I(obs) much Smaller I(calc) . 1 Check  
 PLAT934\_ALERT\_3\_C Number of (Iobs-Icalc)/SigmaW > 10 Outliers .... 1 Check  
 PLAT977\_ALERT\_2\_C Check Negative Difference Density on H26 -0.42 eA-3  
 PLAT977\_ALERT\_2\_C Check Negative Difference Density on H39A -0.36 eA-3  
 PLAT977\_ALERT\_2\_C Check Negative Difference Density on H47B -0.32 eA-3  
 PLAT978\_ALERT\_2\_C Number C-C Bonds with Positive Residual Density. 0 Info

### Alert level G

PLAT002\_ALERT\_2\_G Number of Distance or Angle Restraints on AtSite 14 Note  
 PLAT171\_ALERT\_4\_G The CIF-Embedded .res File Contains EADP Records 2 Report  
 PLAT175\_ALERT\_4\_G The CIF-Embedded .res File Contains SAME Records 1 Report  
 PLAT178\_ALERT\_4\_G The CIF-Embedded .res File Contains SIMU Records 1 Report  
 PLAT302\_ALERT\_4\_G Anion/Solvent/Minor-Residue Disorder (Resd 2 ) 100% Note  
 PLAT302\_ALERT\_4\_G Anion/Solvent/Minor-Residue Disorder (Resd 3 ) 100% Note  
 PLAT304\_ALERT\_4\_G Non-Integer Number of Atoms in ..... Resd 2 4.24 Check  
 PLAT304\_ALERT\_4\_G Non-Integer Number of Atoms in ..... Resd 3 2.77 Check  
 PLAT343\_ALERT\_2\_G Unusual Angle Range in Main Residue for C37 Check  
 PLAT398\_ALERT\_2\_G Deviating C-O-C Angle From 120 for O1 106.2 Degree  
 PLAT860\_ALERT\_3\_G Number of Least-Squares Restraints ..... 21 Note  
 PLAT909\_ALERT\_3\_G Percentage of I>2sig(I) Data at Theta(Max) Still 54% Note

0 **ALERT level A** = Most likely a serious problem - resolve or explain  
 1 **ALERT level B** = A potentially serious problem, consider carefully  
 24 **ALERT level C** = Check. Ensure it is not caused by an omission or oversight  
 12 **ALERT level G** = General information/check it is not something unexpected

0 ALERT type 1 CIF construction/syntax error, inconsistent or missing data  
 14 ALERT type 2 Indicator that the structure model may be wrong or deficient  
 9 ALERT type 3 Indicator that the structure quality may be low  
 14 ALERT type 4 Improvement, methodology, query or suggestion  
 0 ALERT type 5 Informative message, check

---

---

It is advisable to attempt to resolve as many as possible of the alerts in all categories. Often the minor alerts point to easily fixed oversights, errors and omissions in your CIF or refinement strategy, so attention to these fine details can be worthwhile. In order to resolve some of the more serious problems it may be necessary to carry out additional measurements or structure refinements. However, the purpose of your study may justify the reported deviations and the more serious of these should normally be commented upon in the discussion or experimental section of a paper or in the "special\_details" fields of the CIF. checkCIF was carefully designed to identify outliers and unusual parameters, but every test has its limitations and alerts that are not important in a particular case may appear. Conversely, the absence of alerts does not guarantee there are no aspects of the results needing attention. It is up to the individual to critically assess their own results and, if necessary, seek expert advice.

### **Publication of your CIF in IUCr journals**

A basic structural check has been run on your CIF. These basic checks will be run on all CIFs submitted for publication in IUCr journals (*Acta Crystallographica*, *Journal of Applied Crystallography*, *Journal of Synchrotron Radiation*); however, if you intend to submit to *Acta Crystallographica Section C* or *E* or *IUCrData*, you should make sure that full publication checks are run on the final version of your CIF prior to submission.

### **Publication of your CIF in other journals**

Please refer to the *Notes for Authors* of the relevant journal for any special instructions relating to CIF submission.

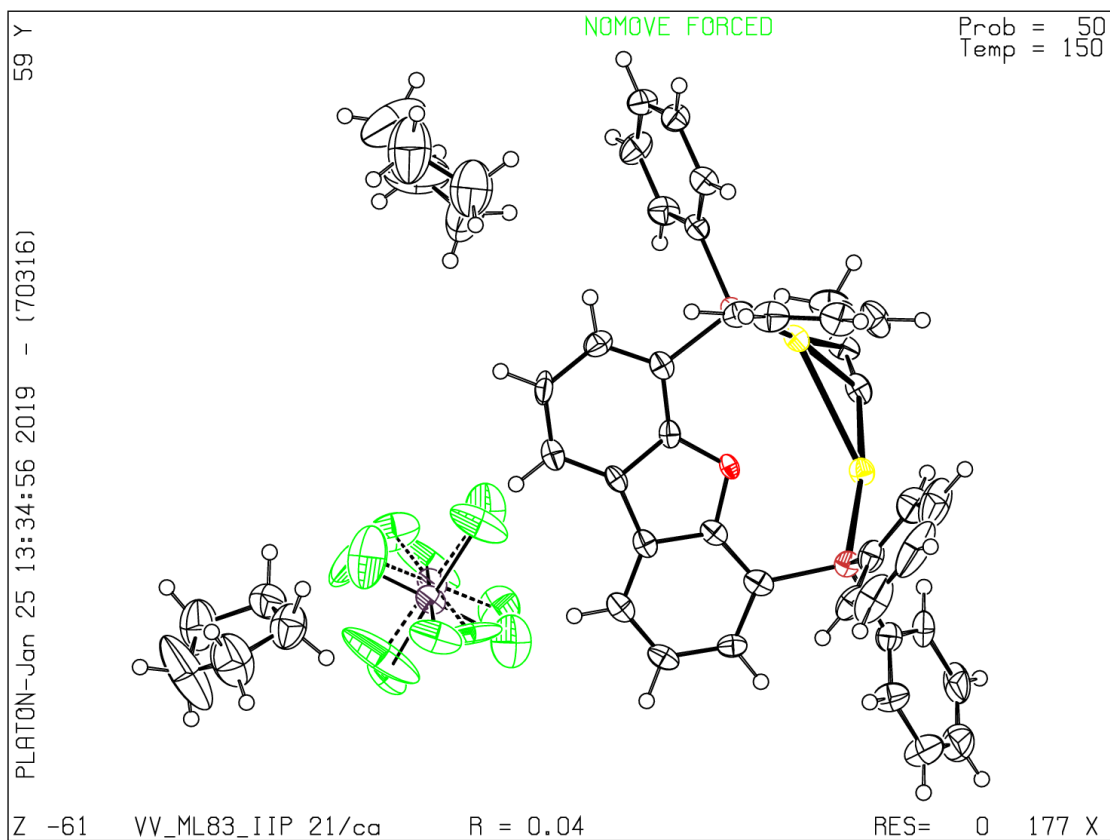

Supplement: s1 [file s1]
