# Supplementary material
Source: MDPI journal article supplement (https://www.mdpi.com/2304-6740/7/3/28)

# checkCIF/PLATON report

Structure factors have been supplied for datablock(s) xs0849a

THIS REPORT IS FOR GUIDANCE ONLY. IF USED AS PART OF A REVIEW PROCEDURE FOR PUBLICATION, IT SHOULD NOT REPLACE THE EXPERTISE OF AN EXPERIENCED CRYSTALLOGRAPHIC REFEREE.

No syntax errors found.      CIF dictionary      Interpreting this report

## Datablock: xs0849a

---

Bond precision:    C-C = 0.0149 Å

Wavelength=1.54178

Cell:                a=10.9408(3)                b=13.9559(4)                c=22.9525(8)  
                      alpha=88.551(3)            beta=87.044(3)            gamma=89.587(2)  
Temperature:        110 K

|                | Calculated                 | Reported                      |
|----------------|----------------------------|-------------------------------|
| Volume         | 3498.74(19)                | 3498.74(19)                   |
| Space group    | P -1                       | P -1                          |
| Hall group     | -P 1                       | -P 1                          |
| Moiety formula | C36 H26 Au2 Cl O P2, F6 Sb | C36 H26 Au2 Cl O P2, F6 Sb    |
| Sum formula    | C36 H26 Au2 Cl F6 O P2 Sb  | C72 H52 Au4 Cl2 F12 O2 P4 Sb2 |
| Mr             | 1201.66                    | 2403.28                       |
| Dx, g cm-3     | 2.281                      | 2.281                         |
| Z              | 4                          | 2                             |
| Mu (mm-1)      | 23.648                     | 23.648                        |
| F000           | 2240.0                     | 2240.0                        |
| F000'          | 2214.16                    |                               |
| h,k,lmax       | 13,17,28                   | 13,17,28                      |
| Nref           | 13727                      | 15046                         |
| Tmin,Tmax      | 0.111,0.307                | 0.142,0.446                   |
| Tmin'          | 0.031                      |                               |

Correction method= # Reported T Limits: Tmin=0.142 Tmax=0.446

AbsCorr = ANALYTICAL

Data completeness= 1.096

Theta(max)= 71.896

R(reflections)= 0.0382( 13204)

wR2(reflections)= 0.1116( 15046)

S = 1.038

Npar= 884

---

The following ALERTS were generated. Each ALERT has the format

**test-name\_ALERT\_alert-type\_alert-level.**

Click on the hyperlinks for more details of the test.

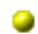

### Alert level C

|                   |         |                   |                                 |         |           |
|-------------------|---------|-------------------|---------------------------------|---------|-----------|
| PLAT241_ALERT_2_C | High    | 'MainMol'         | Ueq as Compared to Neighbors of | C11B    | Check     |
| PLAT244_ALERT_4_C | Low     | 'Solvent'         | Ueq as Compared to Neighbors of | Sb1     | Check     |
| PLAT244_ALERT_4_C | Low     | 'Solvent'         | Ueq as Compared to Neighbors of | Sb2     | Check     |
| PLAT342_ALERT_3_C | Low     | Bond Precision on | C-C Bonds .....                 | 0.01491 | Ang.      |
| PLAT911_ALERT_3_C | Missing | FCF Refl Between  | Thmin & STh/L=                  | 0.600   | 16 Report |

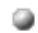

### Alert level G

FORMU01\_ALERT\_1\_G There is a discrepancy between the atom counts in the  
\_chemical\_formula\_sum and \_chemical\_formula\_moiety. This is  
usually due to the moiety formula being in the wrong format.  
Atom count from \_chemical\_formula\_sum: C72 H52 Au4 Cl2 F12 O2 P4 Sb2  
Atom count from \_chemical\_formula\_moiety:C36 H26 Au2 Cl1 F6 O1 P2 Sb1

|                   |                                                  |       |         |
|-------------------|--------------------------------------------------|-------|---------|
| PLAT003_ALERT_2_G | Number of Uiso or Uij Restrained non-H Atoms ... | 6     | Report  |
| PLAT045_ALERT_1_G | Calculated and Reported Z Differ by a Factor ... | 2.00  | Check   |
| PLAT187_ALERT_4_G | The CIF-Embedded .res File Contains RIGU Records | 2     | Report  |
| PLAT398_ALERT_2_G | Deviating C-O-C Angle From 120 for O1A           | 104.5 | Degree  |
| PLAT398_ALERT_2_G | Deviating C-O-C Angle From 120 for O1B           | 105.7 | Degree  |
| PLAT794_ALERT_5_G | Tentative Bond Valency for Sb1 (V)               | 5.02  | Info    |
| PLAT794_ALERT_5_G | Tentative Bond Valency for Sb2 (V)               | 4.92  | Info    |
| PLAT802_ALERT_4_G | CIF Input Record(s) with more than 80 Characters | 57    | Info    |
| PLAT860_ALERT_3_G | Number of Least-Squares Restraints .....         | 18    | Note    |
| PLAT870_ALERT_4_G | ALERTS Related to Twinning Effects Suppressed .. | !     | Info    |
| PLAT912_ALERT_4_G | Missing # of FCF Reflections Above STh/L=        | 0.600 | 28 Note |
| PLAT931_ALERT_5_G | CIFcalcFCF Twin Law ( 0 0 1) Est.d BASF          | 0.34  | Check   |
| PLAT933_ALERT_2_G | Number of OMIT Records in Embedded .res File ... | 7     | Note    |

0 **ALERT level A** = Most likely a serious problem - resolve or explain  
0 **ALERT level B** = A potentially serious problem, consider carefully  
5 **ALERT level C** = Check. Ensure it is not caused by an omission or oversight  
14 **ALERT level G** = General information/check it is not something unexpected

2 ALERT type 1 CIF construction/syntax error, inconsistent or missing data  
5 ALERT type 2 Indicator that the structure model may be wrong or deficient  
3 ALERT type 3 Indicator that the structure quality may be low  
6 ALERT type 4 Improvement, methodology, query or suggestion  
3 ALERT type 5 Informative message, check

It is advisable to attempt to resolve as many as possible of the alerts in all categories. Often the minor alerts point to easily fixed oversights, errors and omissions in your CIF or refinement strategy, so attention to these fine details can be worthwhile. In order to resolve some of the more serious problems it may be necessary to carry out additional measurements or structure refinements. However, the purpose of your study may justify the reported deviations and the more serious of these should normally be commented upon in the discussion or experimental section of a paper or in the "special\_details" fields of the CIF. checkCIF was carefully designed to identify outliers and unusual parameters, but every test has its limitations and alerts that are not important in a particular case may appear. Conversely, the absence of alerts does not guarantee there are no aspects of the results needing attention. It is up to the individual to critically assess their own results and, if necessary, seek expert advice.

### **Publication of your CIF in IUCr journals**

A basic structural check has been run on your CIF. These basic checks will be run on all CIFs submitted for publication in IUCr journals (*Acta Crystallographica*, *Journal of Applied Crystallography*, *Journal of Synchrotron Radiation*); however, if you intend to submit to *Acta Crystallographica Section C* or *E* or *IUCrData*, you should make sure that full publication checks are run on the final version of your CIF prior to submission.

### **Publication of your CIF in other journals**

Please refer to the *Notes for Authors* of the relevant journal for any special instructions relating to CIF submission.

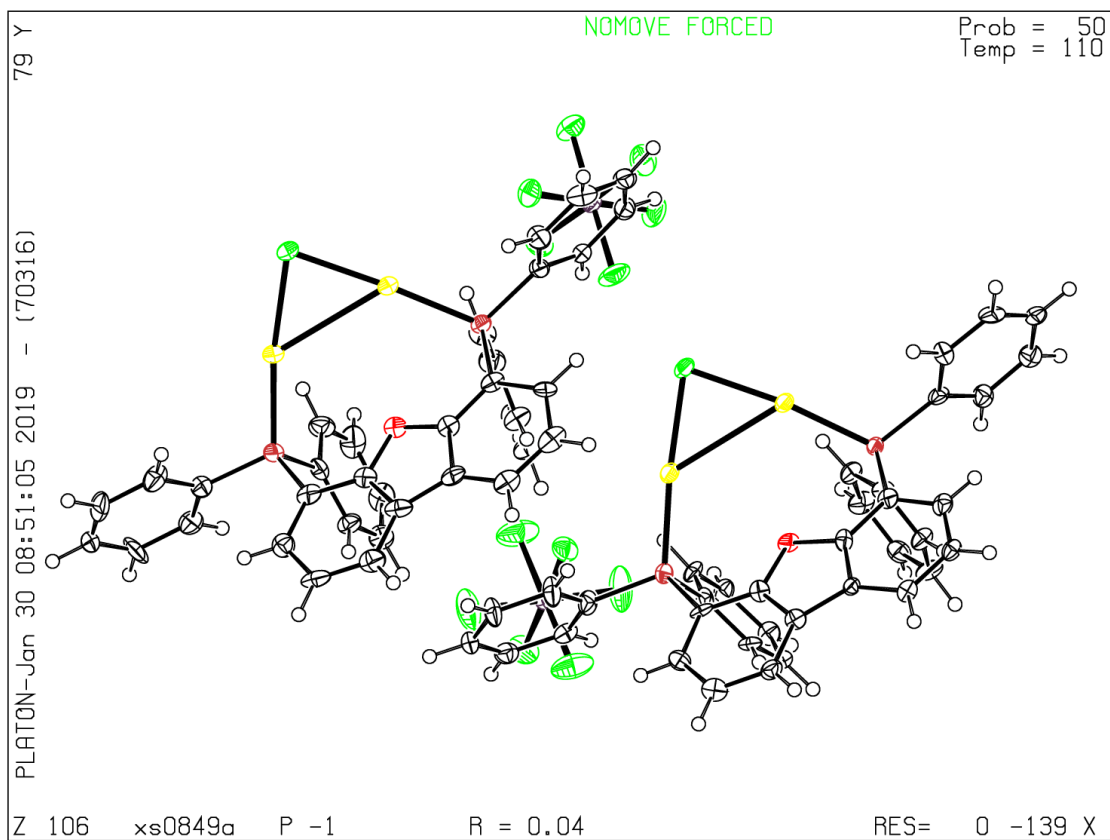

Supplement: s1 [file s1]
