# Supplementary material
Source: MDPI journal article supplement (https://www.mdpi.com/2304-6740/7/3/28)
Supplement: s1 [file s1]

# **Supplementary Materials: Dinuclear Gold Complexes Supported by Wide Bite Angle Diphosphines for Preorganization-Induced Selective Dual-Gold Catalysis**

Marianne Lankelma, Vincent Vreeken, Maxime A. Siegler and Jarl Ivar van der Vlugt

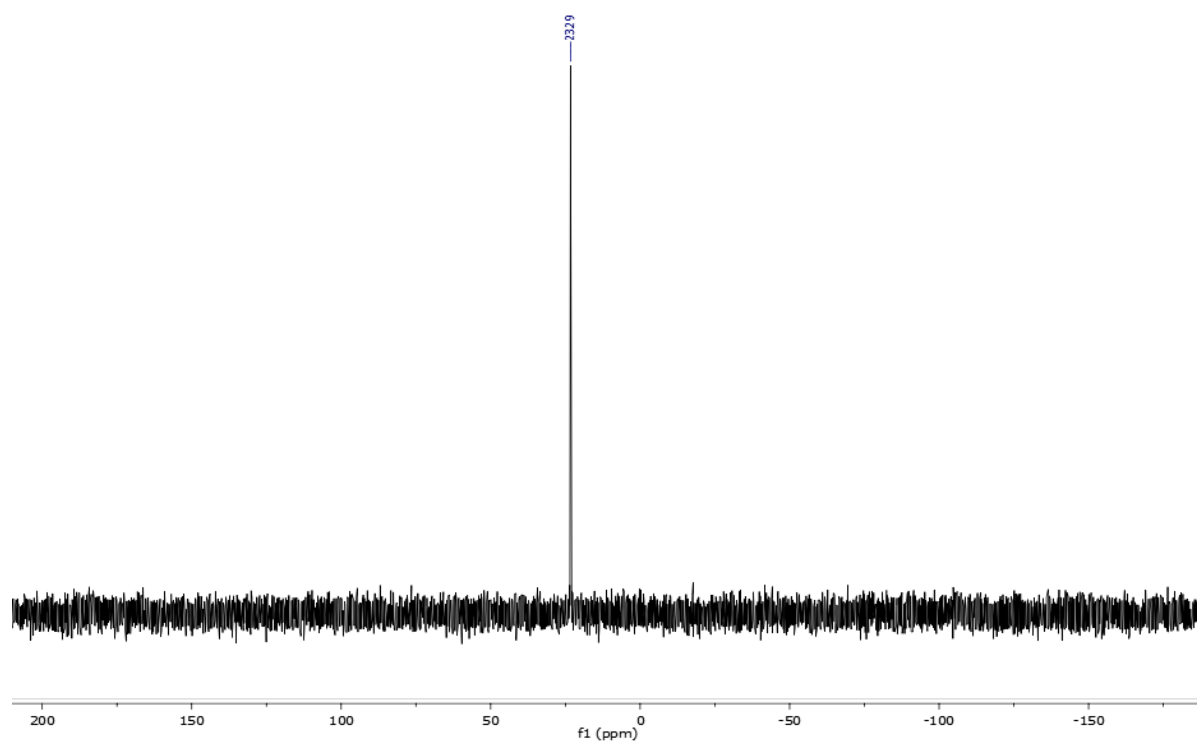

**Figure S1.**  $^{31}\text{P}\{^1\text{H}\}$  NMR spectrum of complex **1** ( $\text{CD}_2\text{Cl}_2$ , 298 K, 202 MHz)

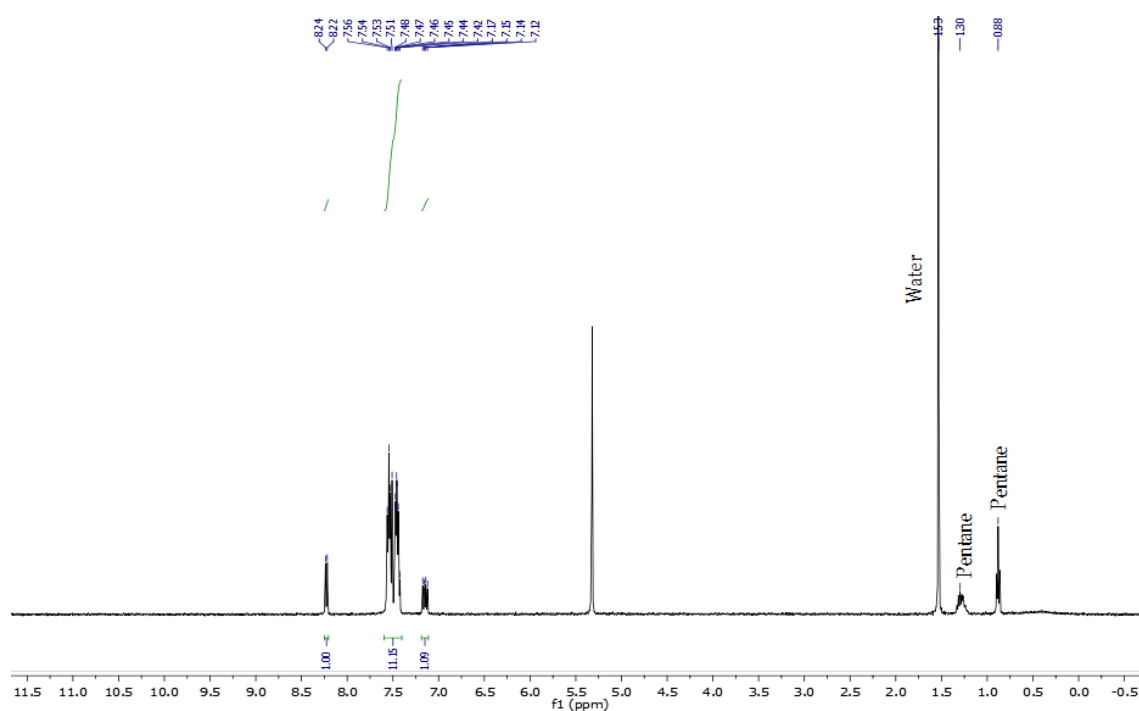

**Figure S2.**  $^1\text{H}$  NMR spectrum of complex **1** ( $\text{CD}_2\text{Cl}_2$ , 298 K, 500 MHz)

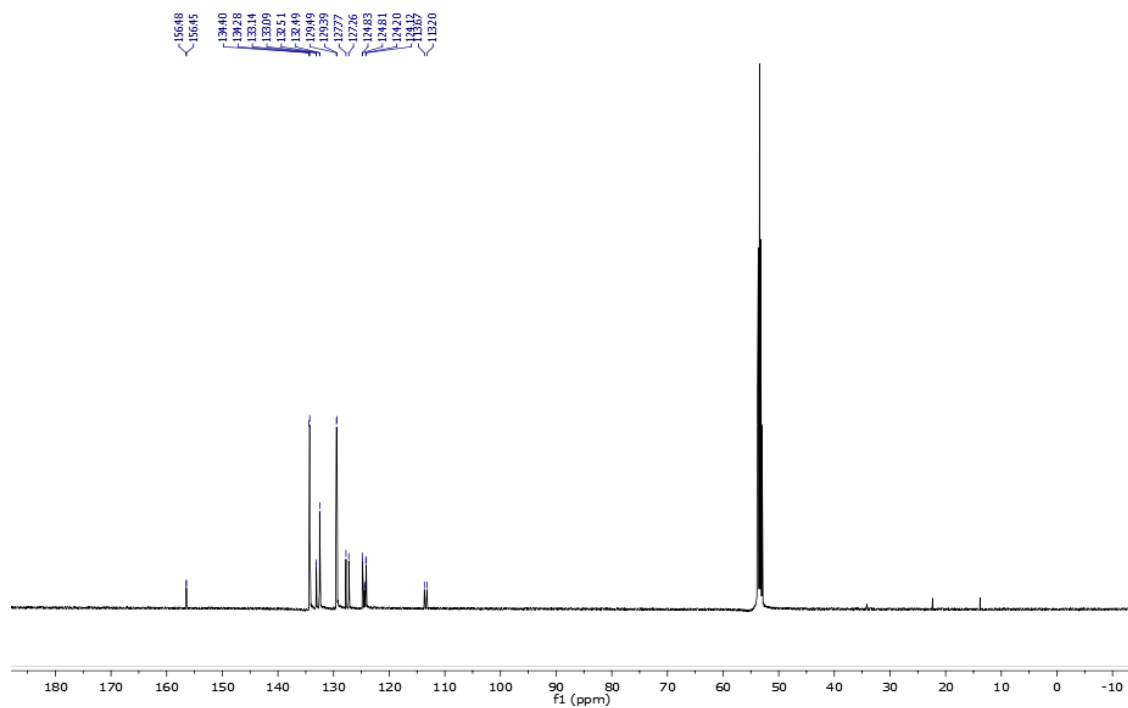

**Figure S3.**  $^{13}\text{C}\{^1\text{H}\}$  NMR spectrum of complex **1** ( $\text{CD}_2\text{Cl}_2$ , 298 K, 126 MHz)

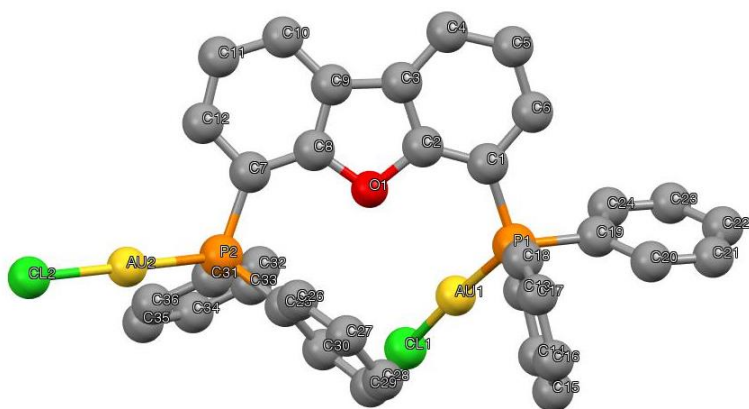

**Figure S4.** Connectivity plot of complex **1**

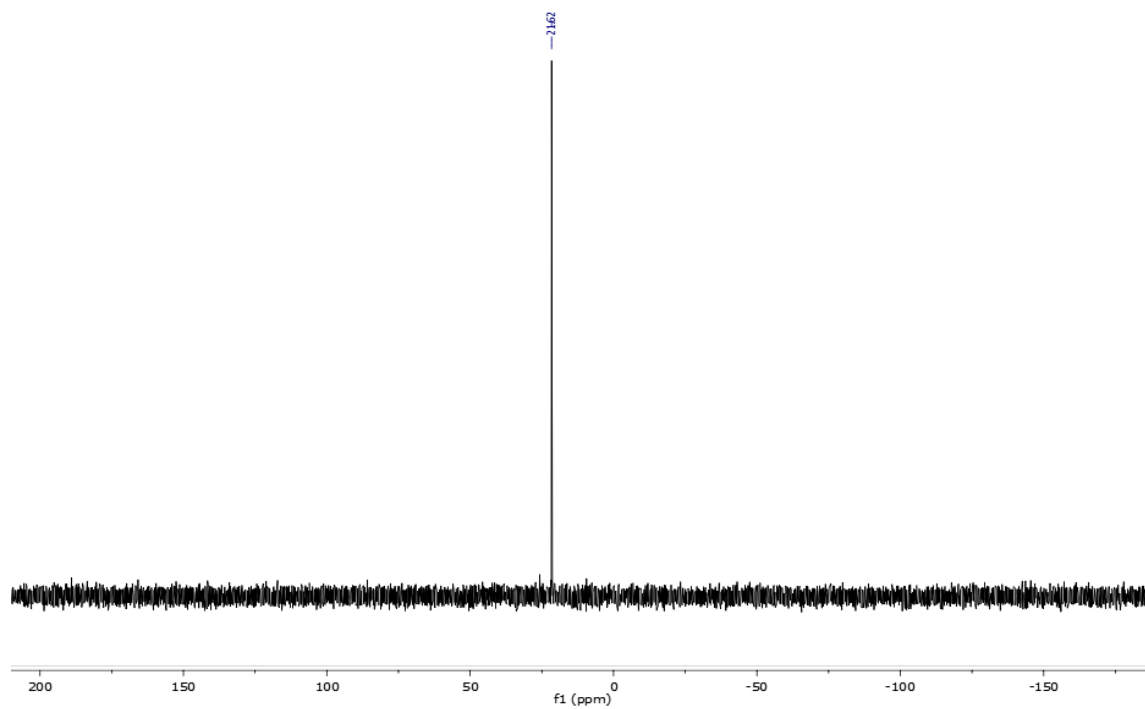

**Figure S5.** <sup>31</sup>P{<sup>1</sup>H} NMR spectrum of complex **2** (CD<sub>2</sub>Cl<sub>2</sub>, 298 K, 162 MHz)

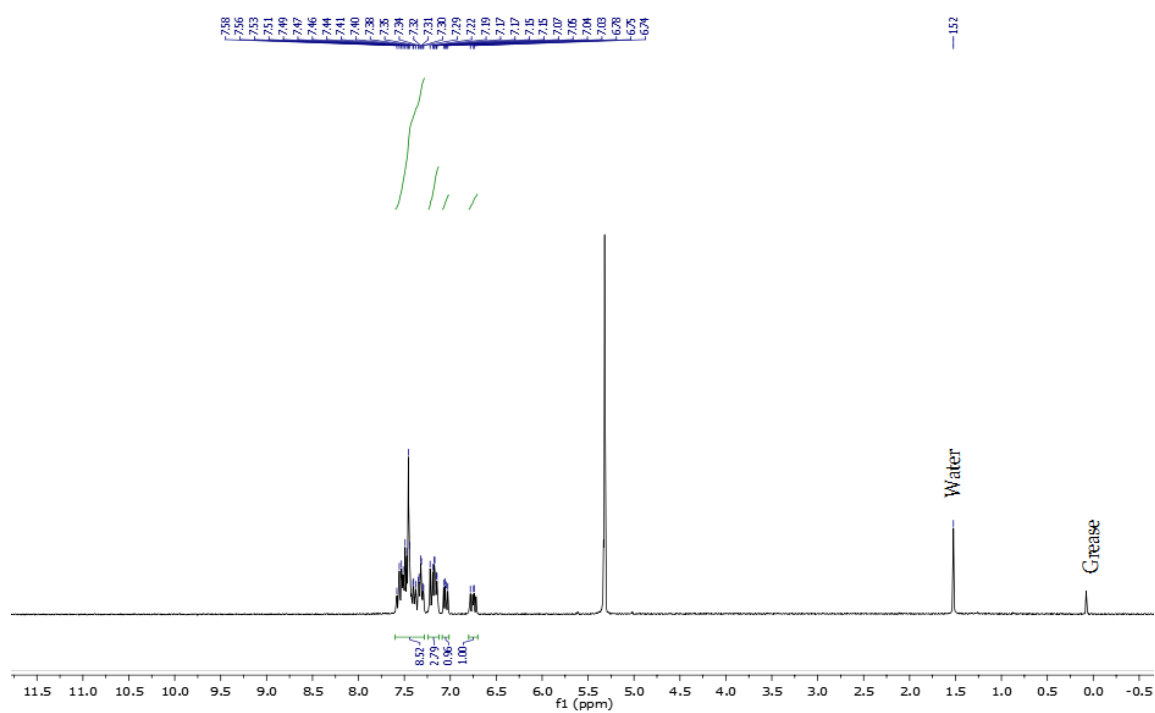

**Figure S6.** <sup>1</sup>H NMR spectrum of complex **2** (CD<sub>2</sub>Cl<sub>2</sub>, 298 K, 400 MHz)

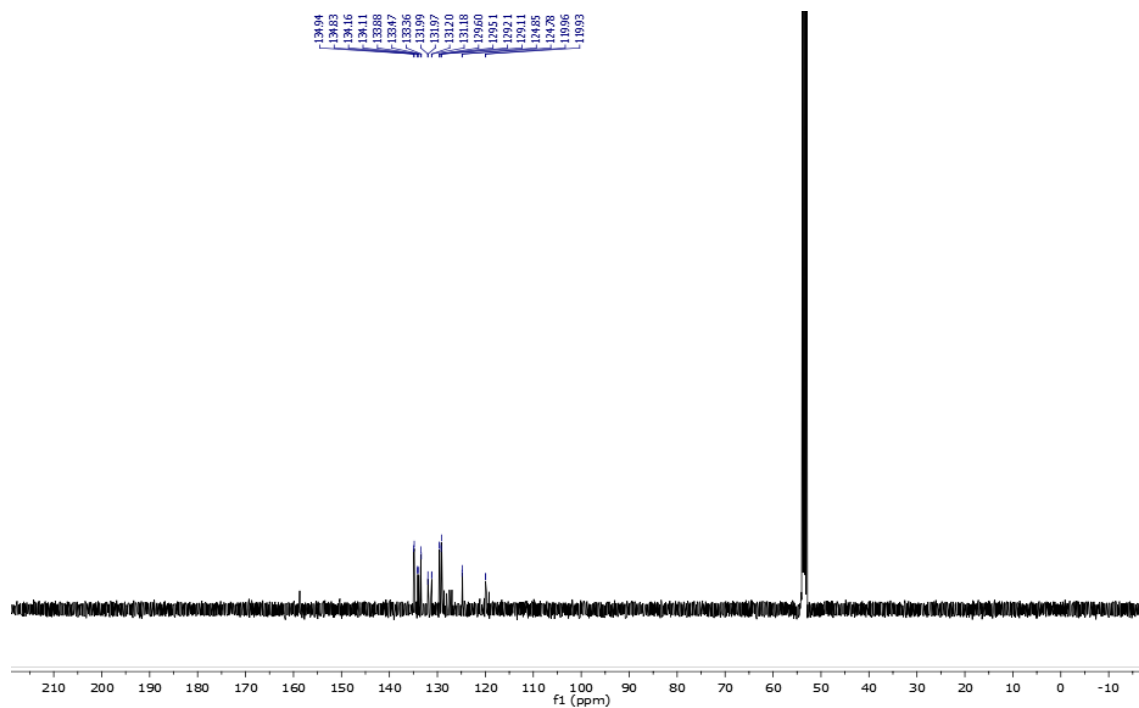

**Figure S7.**  $^{13}\text{C}\{^1\text{H}\}$  NMR spectrum of complex **2** ( $\text{CD}_2\text{Cl}_2$ , 298 K, 101 MHz)

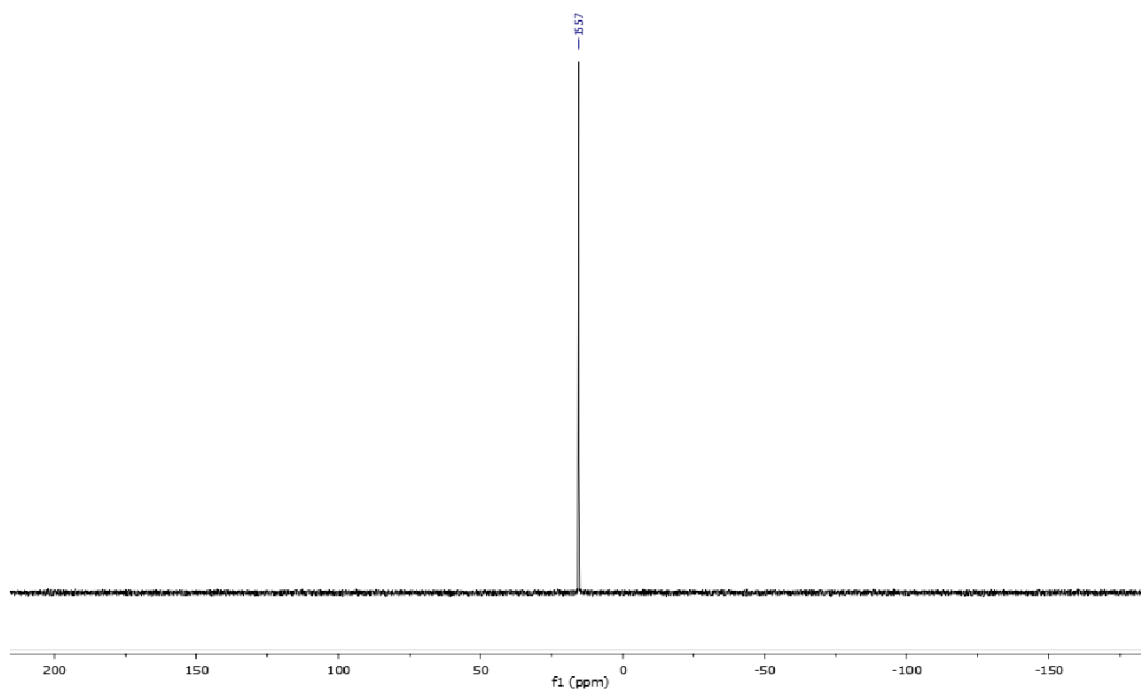

**Figure S8.**  $^{31}\text{P}\{^1\text{H}\}$  NMR spectrum of complex **3** ( $\text{CD}_2\text{Cl}_2$ , 298 K, 121 MHz)

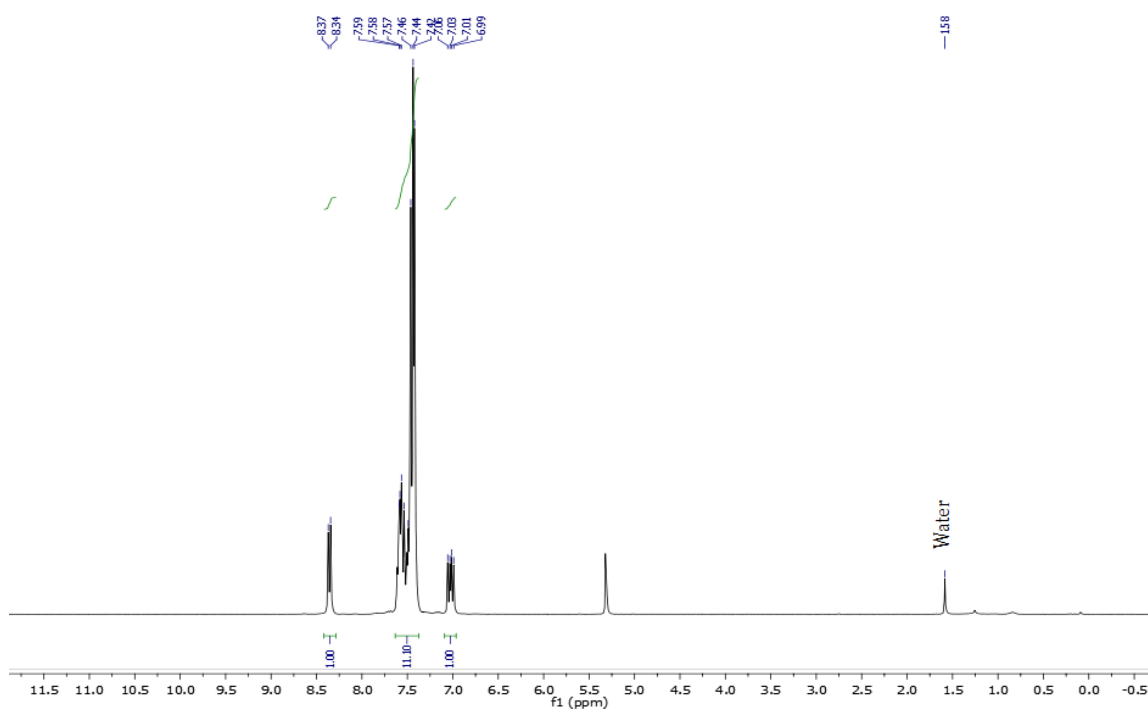

**Figure S9.**  $^1\text{H}$  NMR spectrum of complex **3** ( $\text{CD}_2\text{Cl}_2$ , 298 K, 300 MHz)

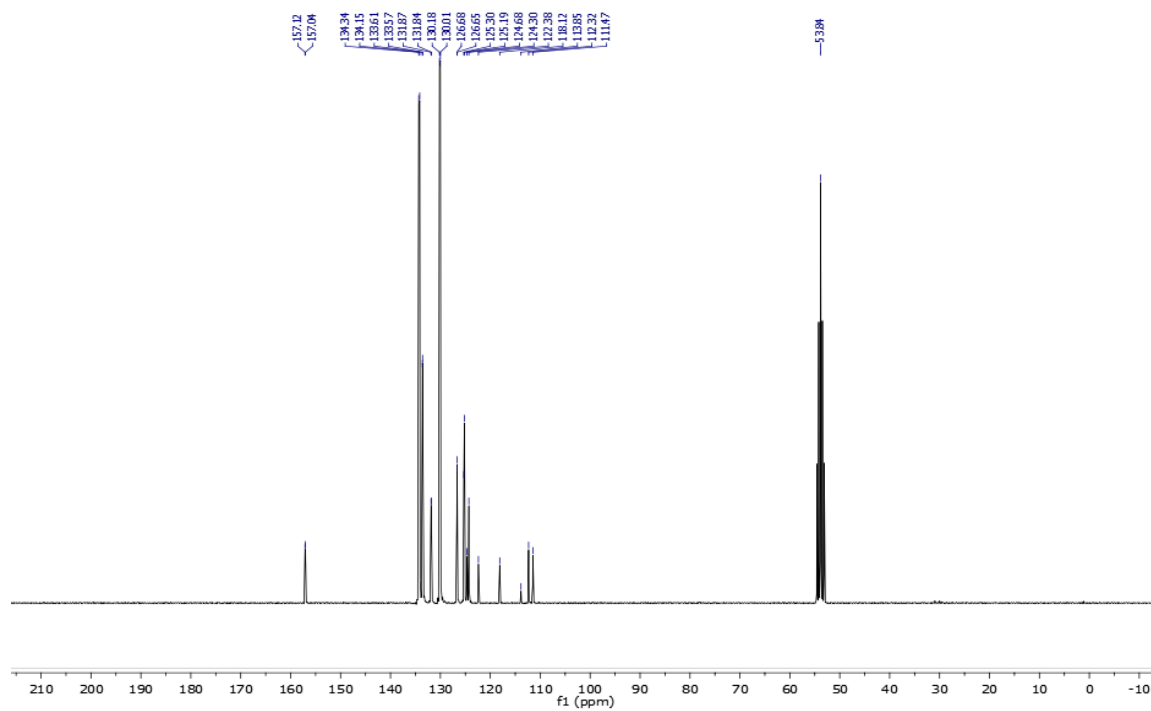

**Figure S10.**  $^{13}\text{C}\{^1\text{H}\}$  NMR spectrum of complex **3** ( $\text{CD}_2\text{Cl}_2$ , 298 K, 75 MHz)

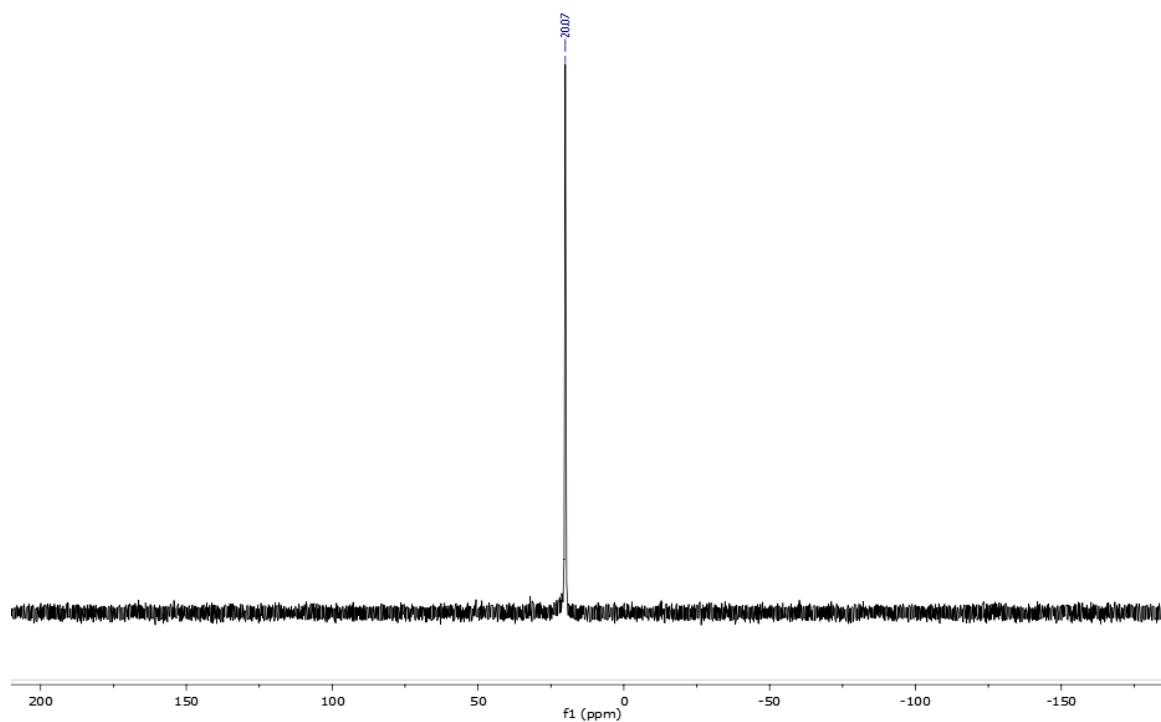

**Figure S11.** <sup>31</sup>P{<sup>1</sup>H} NMR spectrum of complex **4** (CD<sub>2</sub>Cl<sub>2</sub>, 298 K, 121 MHz)

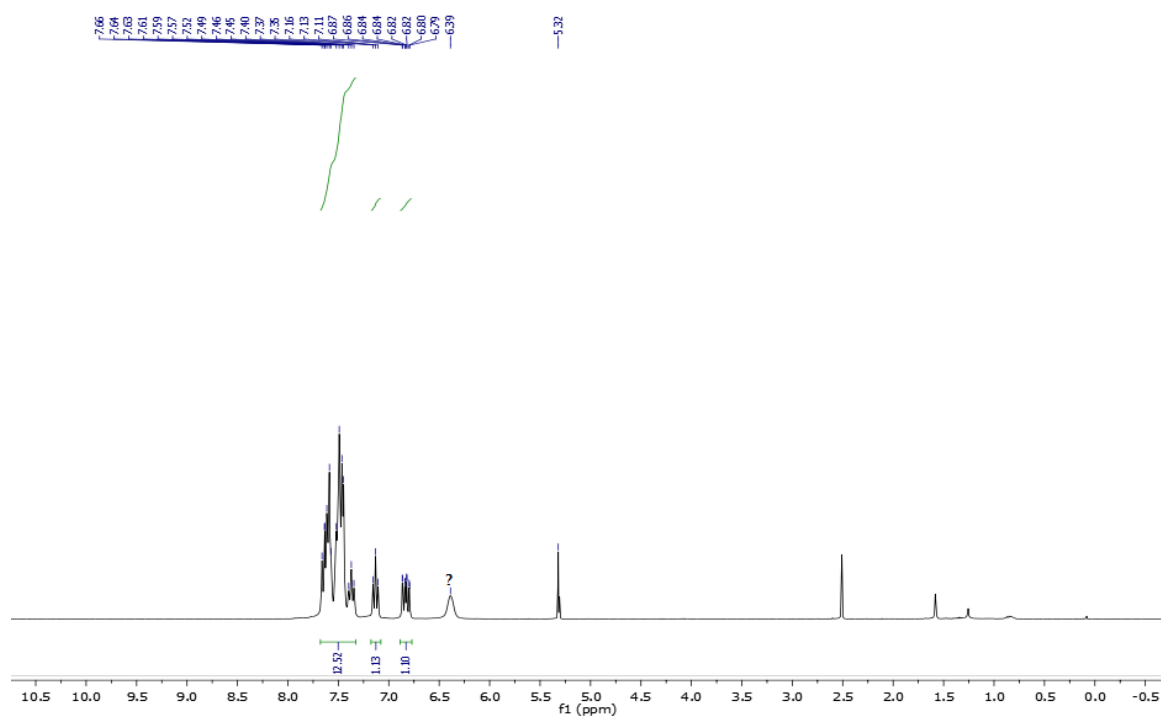

**Figure S12.** <sup>1</sup>H NMR spectrum of complex **4** (CD<sub>2</sub>Cl<sub>2</sub>, 298 K, 300 MHz)



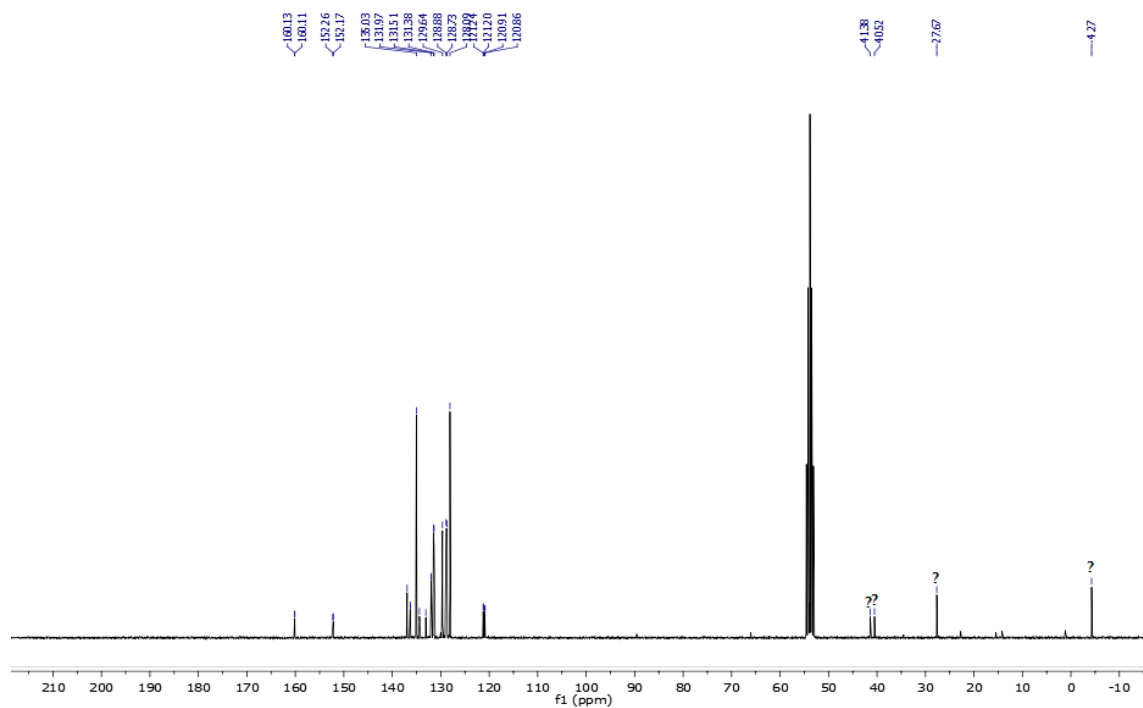

**Figure S13.**  $^{13}\text{C}\{^1\text{H}\}$  NMR spectrum of complex **4** ( $\text{CD}_2\text{Cl}_2$ , 298 K, 75 MHz)

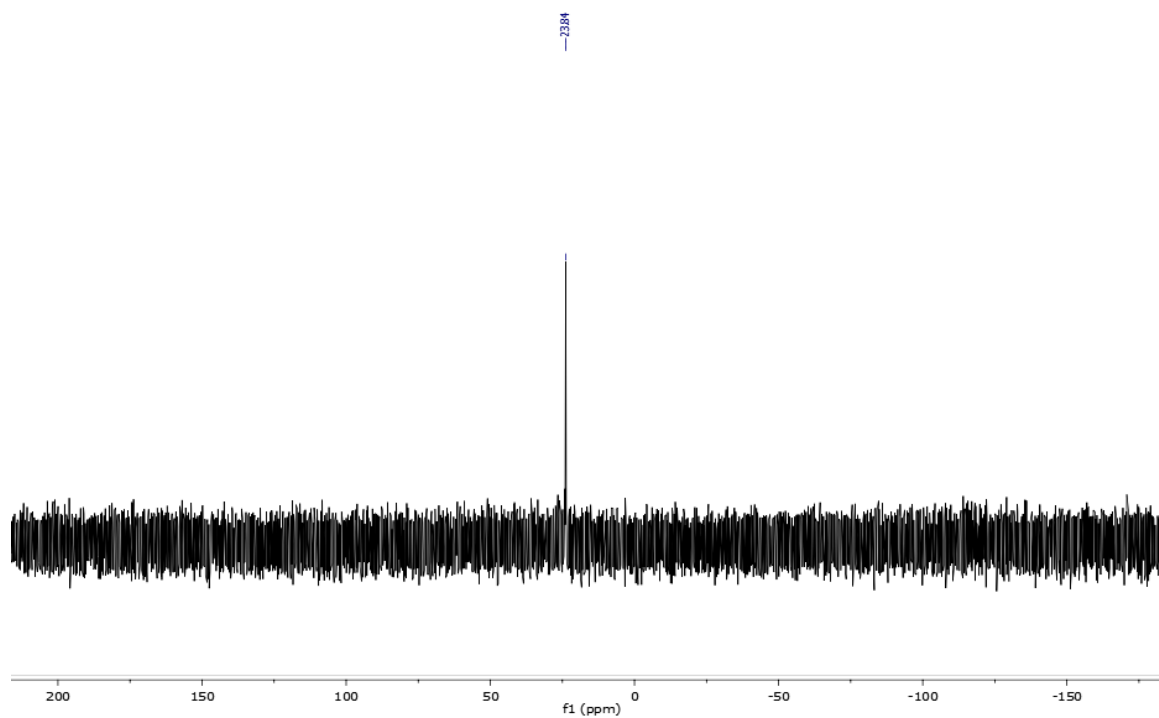

**Figure S14.**  $^{31}\text{P}\{^1\text{H}\}$  NMR spectrum of complex **5** ( $\text{CD}_2\text{Cl}_2$ , 298 K, 162 MHz)

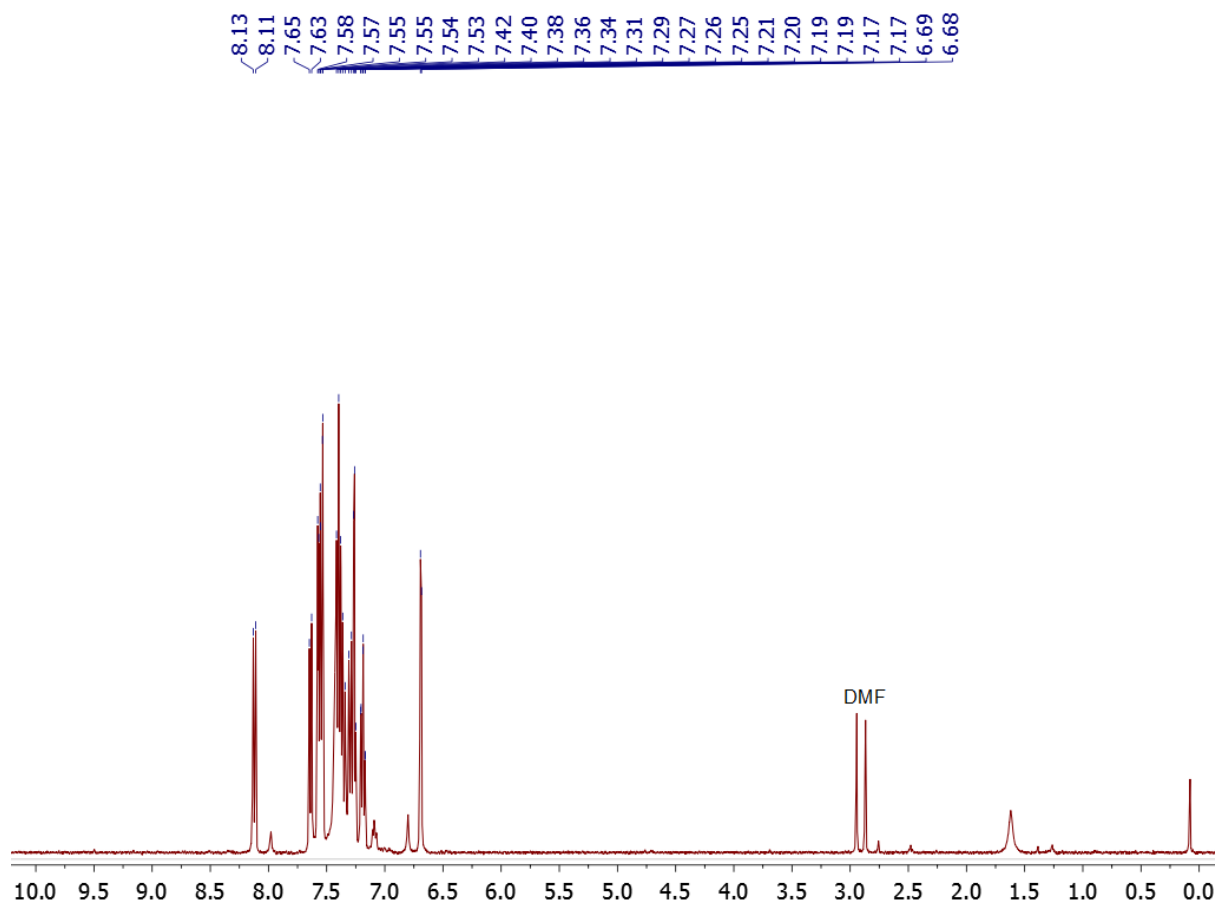

**Figure S15.**  $^1\text{H}$  NMR spectrum of product **B** (98%) and **C** (2%) ( $\text{CDCl}_3$ , 298 K, 400 MHz), obtained by using complex **1** and two equivalents  $\text{AgSbF}_6$ .

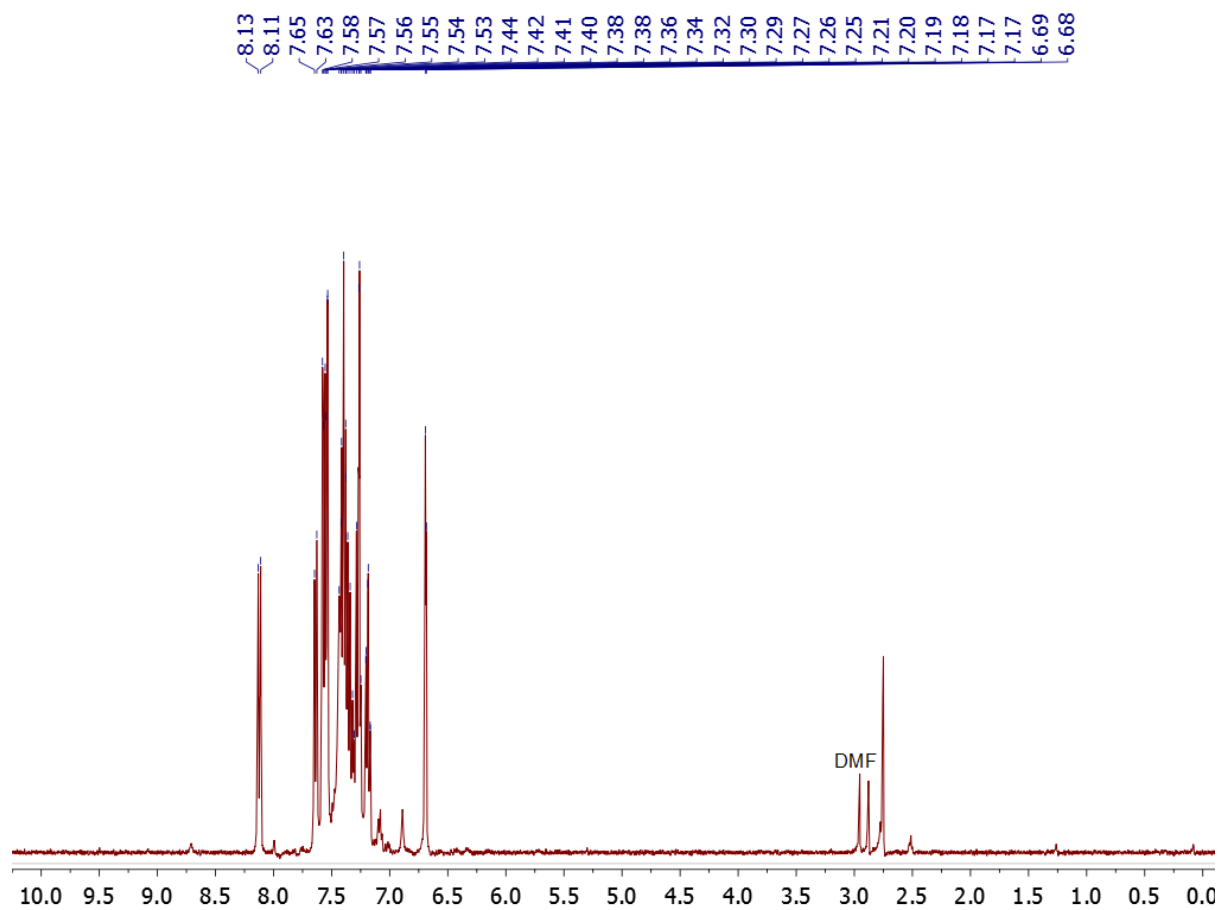

**Figure S16.**  $^1\text{H}$  NMR spectrum of product **B** (100%) ( $\text{CDCl}_3$ , 298 K, 400 MHz), obtained by using complex **2** and two equivalents  $\text{AgSbF}_6$ .

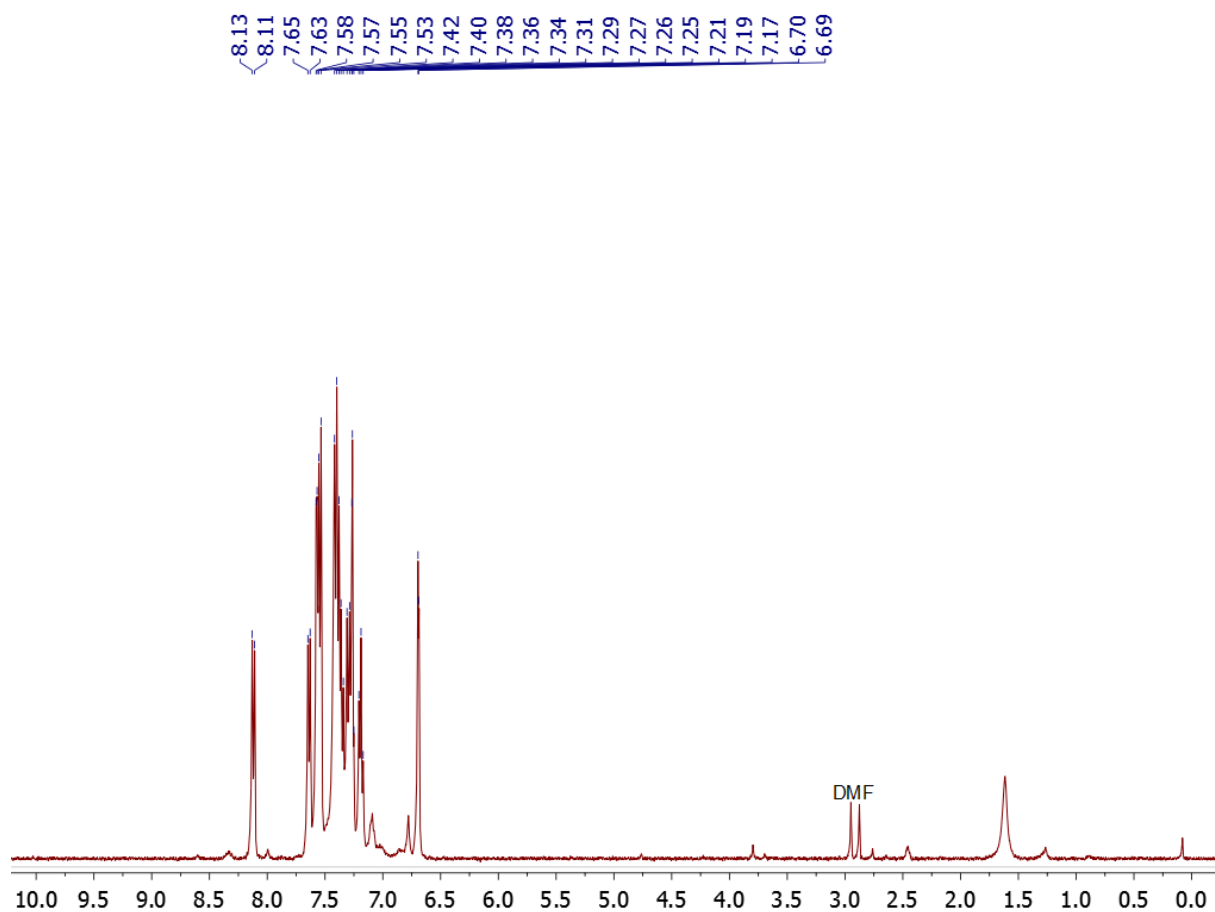

**Figure S17.**  $^1\text{H}$  NMR spectrum of product **B** (97%) and **C** (3%) ( $\text{CDCl}_3$ , 298 K, 400 MHz), obtained by using complex **3** and one equivalent  $\text{AgSbF}_6$ .

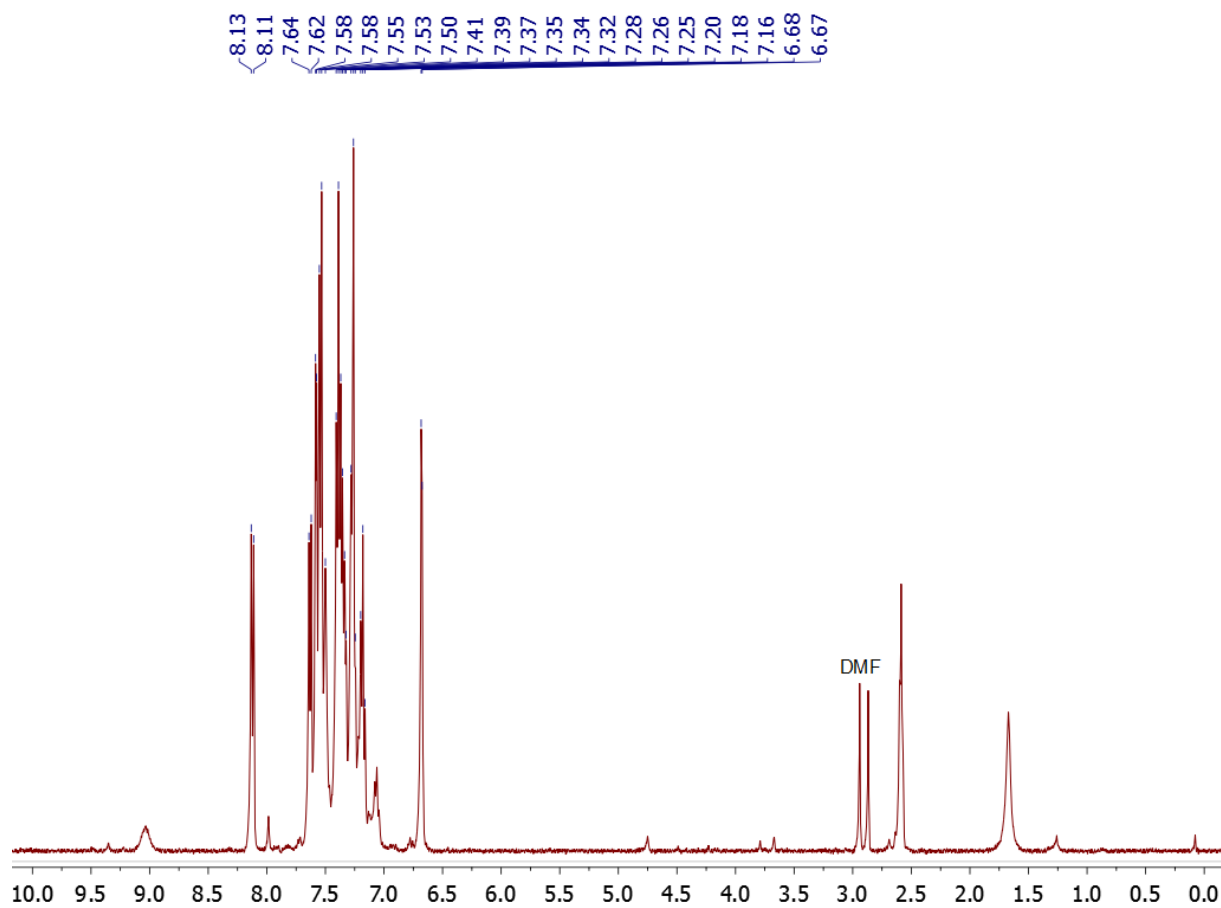

**Figure S18.**  $^1\text{H}$  NMR spectrum of product **B** (95%) and **C** (5%) ( $\text{CDCl}_3$ , 298 K, 400 MHz), obtained by using complex **4** and one equivalent  $\text{AgSbF}_6$ .

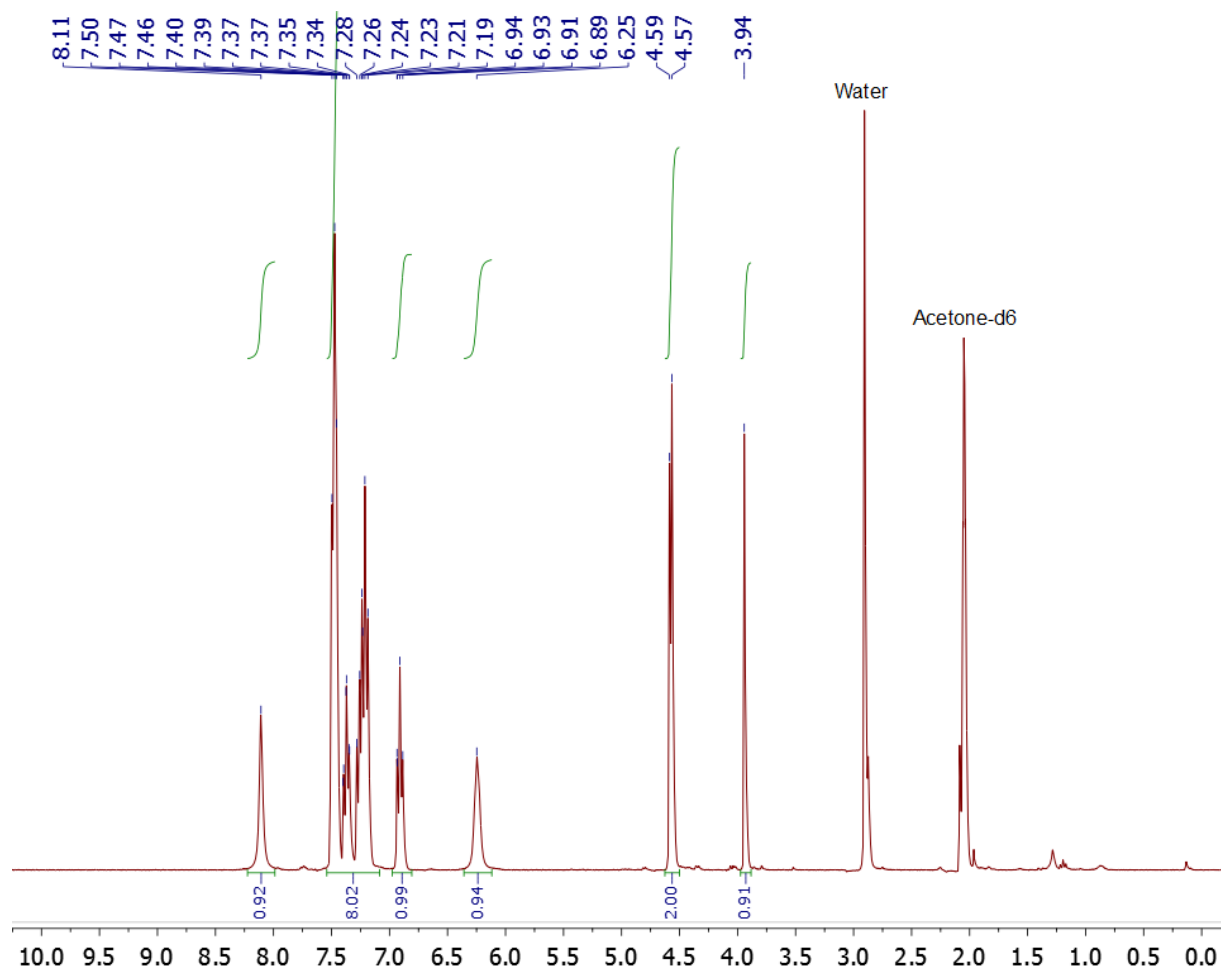

**Figure S19.**  $^1\text{H}$  NMR spectrum of substrate **D** (acetone- $\text{d}_6$ , 298 K, 300 MHz)

Spectral data for product **E**

$^1\text{H}$  NMR (300 MHz, acetone- $\text{d}_6$ , ppm):  $\delta$  8.30 (br s, 1H), 7.62–7.55 (m, 2H), 7.32–7.24 (m, 2H), 7.22–7.12 (m, 3H), 7.10–6.98 (m, 3H), 5.87 (d,  $J = 7.8$  Hz, 1H), 4.92 (s, 2H).

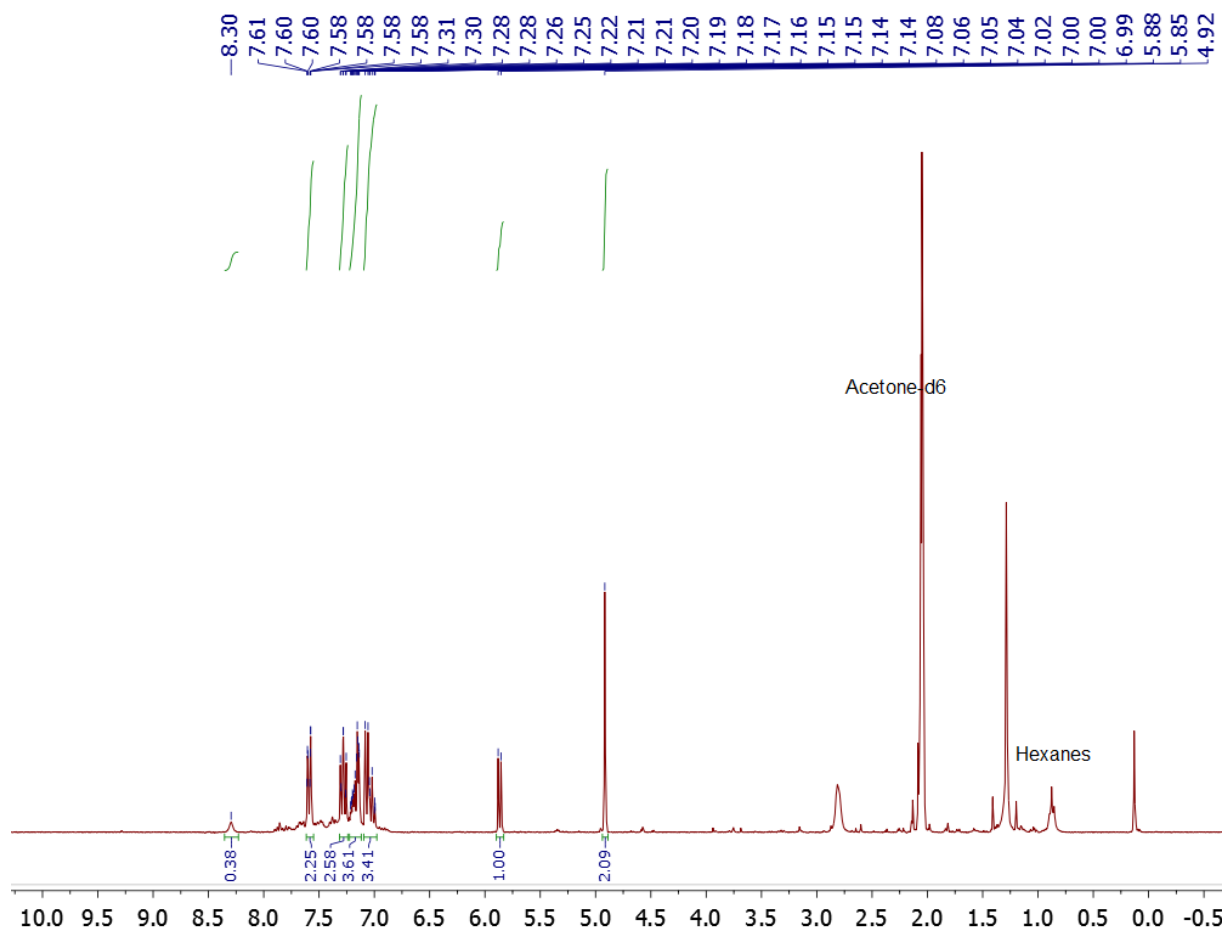

**Figure S20.**  $^1\text{H}$  NMR spectrum of product **E** (acetone- $\text{d}_6$ , 298 K, 300 MHz)



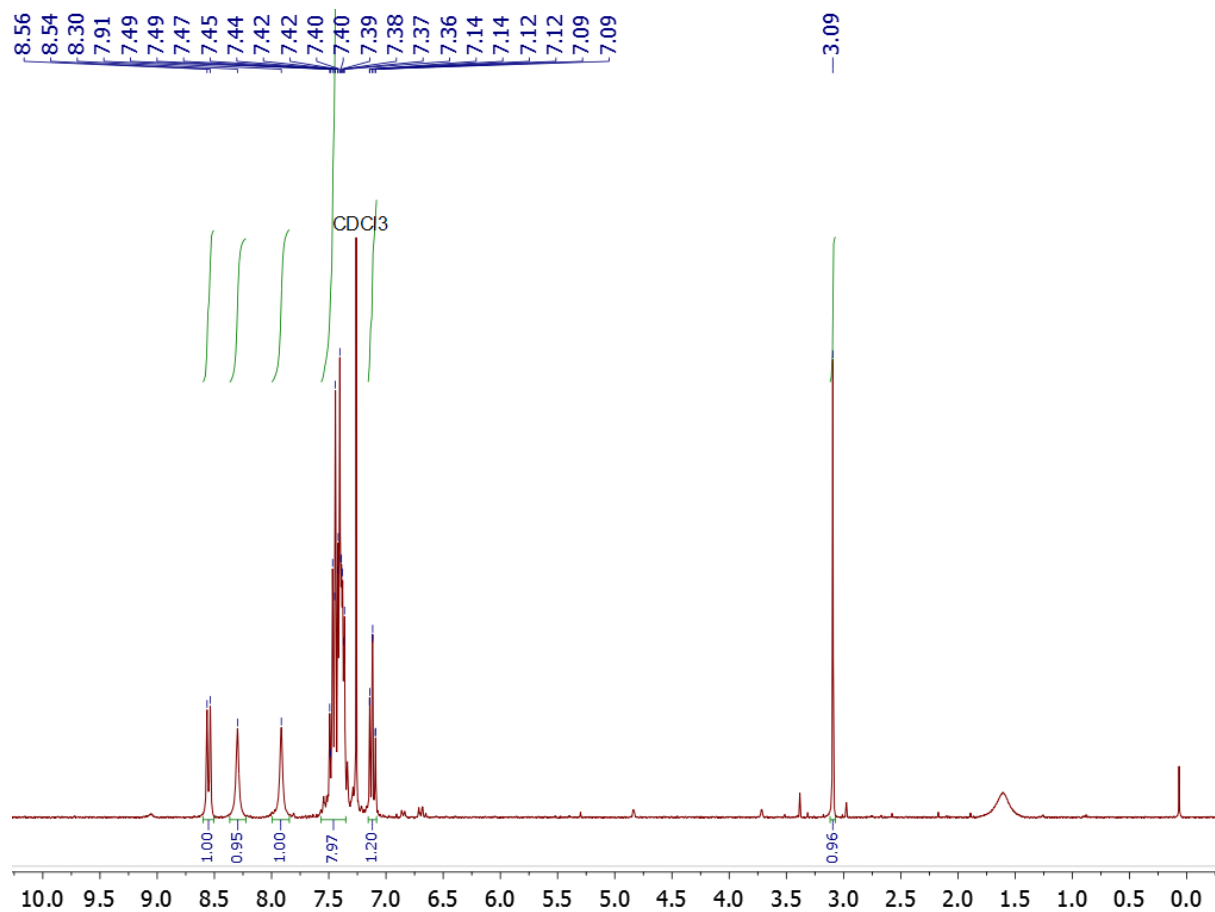

**Figure S21.** <sup>1</sup>H NMR spectrum of substrate **F** (CDCl<sub>3</sub>, 298 K, 300 MHz)

Spectral data for product **G**

$^1\text{H}$  NMR (300 MHz,  $\text{CDCl}_3$ , ppm):  $\delta$  7.80–6.94 (m, 9H), 5.68 (s, 1H), 5.23 (s, 1H).

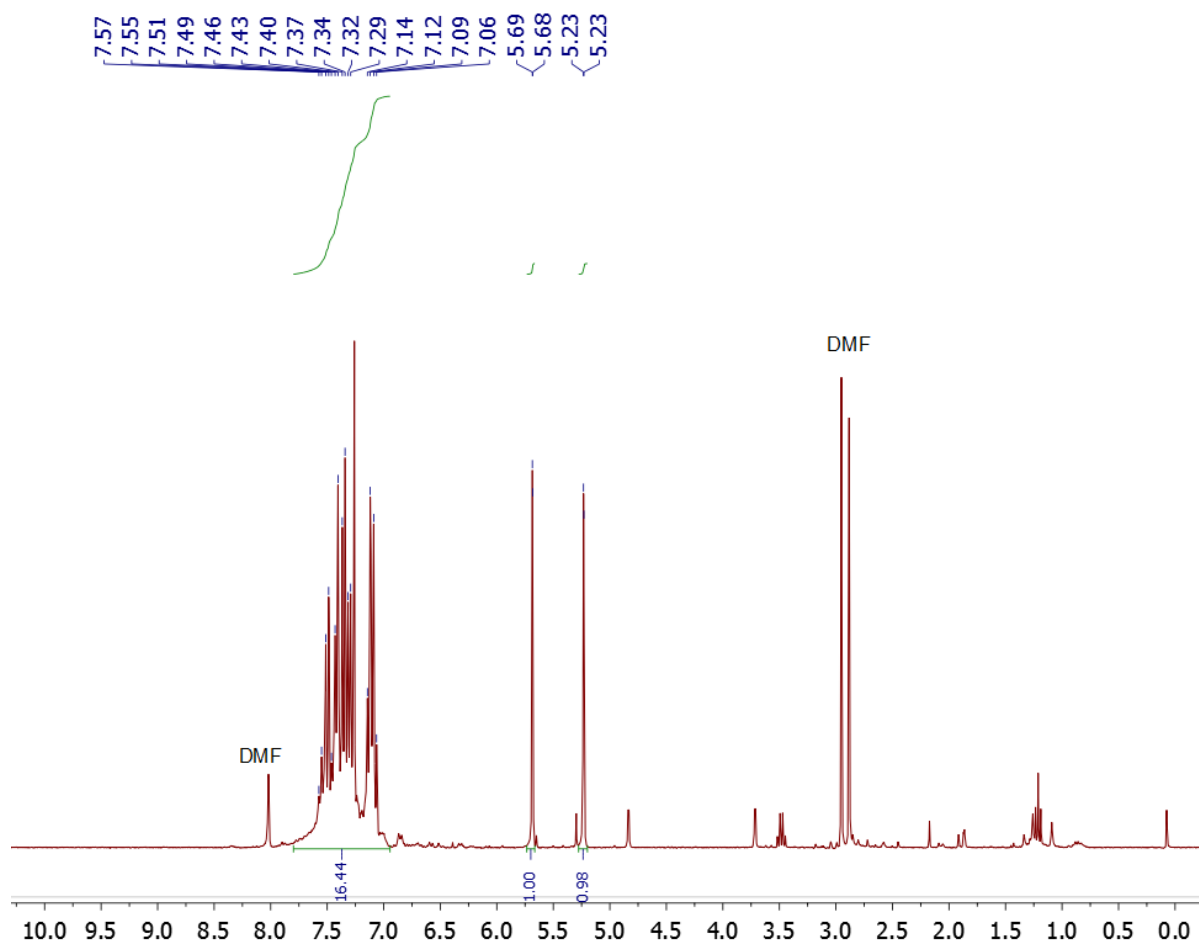

**Figure S22.**  $^1\text{H}$  NMR spectrum of product **G** ( $\text{CDCl}_3$ , 298 K, 300 MHz)

Spectral data for product **H** (see ref S1)

$^1\text{H}$  NMR (300 MHz,  $\text{CDCl}_3$ , ppm):  $\delta$  8.17 (br s, 1H), 7.65 (d,  $J = 7.8$  Hz, 1H), 7.41 (d,  $J = 8.1$  Hz, 1H), 7.24–7.18 (m, 2H), 7.12 (t,  $J = 7.4$  Hz, 1H), 6.56 (s, 1H).

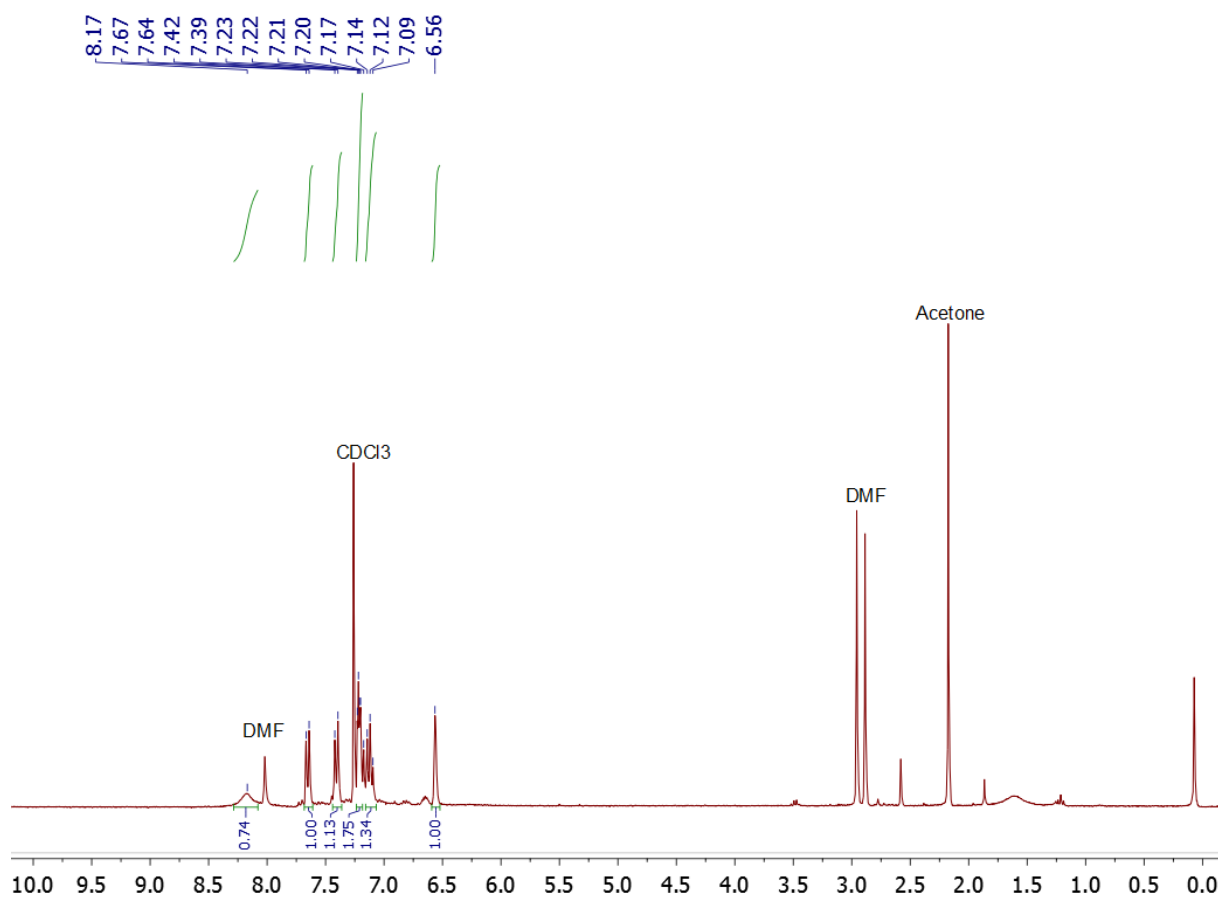

**Figure S23.**  $^1\text{H}$  NMR spectrum of product **H** ( $\text{CDCl}_3$ , 298 K, 300 MHz)

## References

S1 Kanchupalli, V.; Joseph, D.; Katukojvala, S. Pyridazine *N*-Oxides as Precursors of Metallocarbenes: Rhodium-Catalyzed Transannulation with Pyrroles. *Org. Lett.* **2015**, *17*, 5878–5881.
