# Supplementary material
Source: MDPI journal article supplement (https://www.mdpi.com/2304-6740/7/3/28)
Supplement: s1 [file s1]

Archive with 9 entries (7 files):
- inorganics-445955-supplementary/
- inorganics-445955-supplementary/cif and checkcif files/
- inorganics-445955-supplementary/cif and checkcif files/complex 2 checkcif.pdf
- inorganics-445955-supplementary/cif and checkcif files/complex 2.cif
- inorganics-445955-supplementary/cif and checkcif files/complex 3 checkcif.pdf
- inorganics-445955-supplementary/cif and checkcif files/complex 3.cif
- inorganics-445955-supplementary/cif and checkcif files/complex 5 checkcif.pdf
- inorganics-445955-supplementary/cif and checkcif files/complex 5.cif
- inorganics-445955-supplementary/inorganics-445955-supplementary.pdf
