# Supplementary material
Source: MDPI journal article supplement (https://www.mdpi.com/2304-6740/7/3/28)
Supplement: s1 [file s1 › inorganics-445955-supplementary/cif and checkcif files/complex 2.cif]

 
data_xs0846a
 
_audit_creation_method            'SHELXL-2014/7'
_shelx_SHELXL_version_number      '2014/7'
_chemical_name_systematic         ?
_chemical_name_common             ?
_chemical_melting_point           ?
_chemical_formula_moiety          
 'C36 H28 Au2 Cl2 O P2, 0.279(C H Cl3), 0.721(C3 H6 O)'
_chemical_formula_sum
 'C38.44 H32.61 Au2 Cl2.84 O1.72 P2' 
_chemical_formula_weight          1078.64


_twin_information
;

 * * * CRYSALIS TWIN DATA REDUCTION FINALIZING (Version 1.171.37.35 (release 13-08-2014 CrysAlis171 .NET)) * * *
Laue class: 2/m (b-unique) - Friedel mate is equivalent
Lattice type: P-lattice 
DC PROFFITRRPTWIN INFO: Step 1 - Loading orientation matrices (UB) of 2 components
 
DC PROFFITRRPTWIN INFO: Loading UB component 1
 
DC PROFFITRRPTWIN INFO: Loading UB component 2
 
DC PROFFITRRPTWIN INFO: Step 2 - Computing crossed twin laws
 
Twin law determination (relative to component 1)
Matrix 1 is taken from component 1 (   8.981   20.612   19.668    90.00   102.47    90.02)
Matrix 2 is taken from component 2 (   8.979   20.607   19.671    90.05   102.47    89.97)
Twin analysis: Component 1 with component 2
TL  =UB[1]-1*UB[2]:   1.0001   0.0000  -0.0001     0.0008  -1.0002   0.0011    -0.9463  -0.0015  -0.9998   det 1.000263
TL-1=UB[2]*UB[1]-1:   0.9998   0.0000  -0.0001    -0.0002  -0.9998  -0.0011    -0.9462   0.0015  -1.0001   det 0.999737
Rot= -179.8971 deg around the following vectors: 
Reciprocal space (hkl): 0.9040 -0.0000 -0.4276
Direct space (uvw)    : 1.0000 0.0001 -0.0001
 
DC PROFFITRRPTWIN INFO: Step 3 - Loading reflections of 2 components
 
DC PROFFITRRPTWIN ALL INFO: Component 1
DC PROFFITRRPTWIN INFO: Face list of component 1 
  1:  -1.0035  -9.9934   8.0073  d=   0.0161
  2:   0.0043   9.9922  -9.0087  d=   0.0132
  3:  -0.0055   4.0118  12.0027  d=   0.0135
  4:  -5.9989   3.0006   1.9931  d=   0.0836
  5:   5.9976  -1.9977   1.0075  d=   0.0902
  6:   4.9983  -6.9993   0.0087  d=   0.0827
  7:   0.0055  -4.0118 -12.0027  d=   0.0216
  8:  -0.0043  -9.9922   9.0087  d=   0.0132
DC PROFFITRRPTWIN ALL INFO: Component 2
DC PROFFITRRPTWIN INFO: Face list of component 2 
  1:  -1.0044   9.9824  -7.0737  d=   0.0161
  2:   0.0056  -9.9799   9.0207  d=   0.0132
  3:  -0.0073  -4.0241 -11.9923  d=   0.0135
  4:  -5.9977  -3.0009   3.6878  d=   0.0836
  5:   5.9959   1.9949  -6.6859  d=   0.0902
  6:   4.9970   6.9966  -4.7490  d=   0.0827
  7:   0.0073   4.0241  11.9923  d=   0.0216
  8:  -0.0056   9.9799  -9.0207  d=   0.0132
 
DC PROFFITRRPTWIN INFO: Step 4 - Analysing composite reflections of 2 components
 
Component 1: 23787 observations read
Component 2: 23798 observations read

28555 composite observations collected (9601 fully isolated, 18954 overlapped), 13 skipped due to one or more missing parts and 34 skipped due to I/sig<-3.0


OVERLAP STATISTICS

2 COMPONENTS

COMPONENTS 1, 2
 Overlap factor | # in range | % of all obs 
 -------------- | ---------- | ------------ 
   0.00 - 0.20  |       5806 |    20.3 <--- ALMOST SEPARATED
   0.20 - 0.40  |       4034 |    14.1
   0.40 - 0.60  |       3976 |    13.9
   0.60 - 0.80  |       3334 |    11.7
   0.80 - 1.00  |       1804 |     6.3 <--- FULLY OVERLAPPED
 -------------- | ---------- | ------------ 
      Total     |      18954 |    66.4

 
DC PROFFITRRPTWIN INFO: Step 5 - Scaling data & analysing twin ratios of 2 components
 
Computed twin ratios:
Twin 1: 67.35% (16259 common observations, 5020 merged)
Twin 2: 32.65% (14372 common observations, 5020 merged)

Preparing data for SCALE3 ABSPACK...

SCALING COMPONENT 1

14751 of 23748 reflections used for ABSPACK refinement
PROFFIT INFO: Inet (after scale3 abspack): min=-1366016.8750 max=5372224.5000
PROFFIT INFO: sig(Inet) (after scale3 abspack): min=338.4023 max=28403.8691
PROFFIT INFO: 54 observations on 'bad frames' rejected


SCALING COMPONENT 2

14958 of 23761 reflections used for ABSPACK refinement
PROFFIT INFO: Inet (after scale3 abspack): min=-3570689.2500 max=5372224.5000
PROFFIT INFO: sig(Inet) (after scale3 abspack): min=338.4023 max=69355.9453

Computed twin ratios:
Twin 1: 66.05% (16223 common observations, 5018 merged)
Twin 2: 33.95% (14368 common observations, 5018 merged)

DC PROFFITRRPTWIN INFO: Determining HKLF4 overlap threshold for completeness requirement (>=80.0%)
DC PROFFITRRPTWIN INFO: New HKLF4 overlap threshold - 0.47

DC PROFFITRRPTWIN INFO: Step 6 - Decomposed intensities statistics (HKLF4)
 
COMPONENT 1

 
Note: The Rint, Rsigma and RsigmaB values are computed for redundant data only!
	Mean F2 and F2/sig(F2) are given for all measured values!
Note: The RsigmaA values are computed for all measured values!

Help: For more information about computations of rint and rsigma please look into Crysalis help: 
 file:__#HELP_DTheoryAlgorithm_DataReductionOutput.html
 

Statistics vs intensity - point group symmetry: P2/m (b-unique)
                      #        #        #      average    mean      mean        
         intensity measured   kept    unique  redundancy   F2     F2/sig(F2)   Rint   Rsigma
--------------------------------------------------------------------------------------------
  2771141-  228186     1624     1624      577    2.8    414906.32    45.66    0.054    0.063
   227626-  124298     1729     1729      577    3.0    168791.88    28.08    0.056    0.062
   124296-   78342     1704     1704      577    3.0     99173.51    21.06    0.064    0.074
    78268-   52602     1609     1609      577    2.8     64799.72    16.00    0.079    0.084
    52601-   33713     1643     1643      577    2.8     42366.02    11.81    0.092    0.099
    33685-   21031     1660     1660      577    2.9     27251.73     8.53    0.135    0.159
    21026-   11634     1675     1675      577    2.9     15935.18     5.45    0.152    0.161
    11631-    5413     1589     1589      577    2.8      8310.00     3.09    0.242    0.253
     5391-    1963     1636     1636      577    2.8      3489.28     1.30    0.403    0.432
     1958- -478846     1426     1426      586    2.4      -961.13     0.11    0.876    2.170
------------------------------------------------------------------------------------------
  2771141- -478846    16295    16295     5779    2.8     85792.12    14.37    0.069    0.080
 

Statistics vs resolution - point group symmetry: P2/m (b-unique)
resolu-      #        #        #               average    mean      mean          
tion(A)   measured   kept    unique           redundancy   F2     F2/sig(F2)   Rint   Rsigma   RsigmaA
------------------------------------------------------------------------------------------------------
 inf-1.64     1233     1233      577             2.1    229760.54    29.14    0.094    0.113     0.027
1.64-1.32     1358     1358      577             2.4    129086.85    14.31    0.087    0.099     0.052
1.32-1.18     2491     2491      577             4.3    108504.81    14.73    0.075    0.090     0.055
1.18-1.08     1877     1877      577             3.3     90696.49    14.55    0.053    0.059     0.053
1.07-1.00     1836     1836      577             3.2     74521.55    13.28    0.051    0.058     0.061
1.00-0.95     1721     1721      577             3.0     64378.25    12.48    0.056    0.059     0.064
0.95-0.90     1642     1642      577             2.8     51721.08    11.34    0.055    0.059     0.070
0.90-0.87     1522     1522      577             2.6     47489.10    12.26    0.053    0.056     0.068
0.87-0.84     1415     1415      577             2.5     39256.52    11.94    0.058    0.061     0.069
0.84-0.81     1200     1200      586             2.0     32080.13    12.32    0.058    0.059     0.068
------------------------------------------------------------------------------------------------------
 inf-0.81    16295    16295     5779             2.8     85792.12    14.37    0.069    0.080     0.052
 

Statistics vs resolution (taking redundancy into account) - point group symmetry: P2/m (b-unique)
resolu-      #        #        #       %       average    mean      mean          
tion(A)    kept     theory   unique complete  redundancy   F2     F2/sig(F2)   Rint  RsigmaB
--------------------------------------------------------------------------------------------
 inf-1.64     1233      898      577   64.3      2.1    229760.54    46.57    0.094    0.017
1.64-1.32     1358      803      577   71.9      2.4    129086.85    23.19    0.087    0.033
1.32-1.18     2491      692      577   83.4      4.3    108504.81    31.60    0.075    0.028
1.18-1.08     1877      737      577   78.3      3.3     90696.49    27.51    0.053    0.029
1.07-1.00     1836      715      577   80.7      3.2     74521.55    24.58    0.051    0.035
1.00-0.95     1721      681      577   84.7      3.0     64378.25    21.97    0.056    0.036
0.95-0.90     1642      687      577   84.0      2.8     51721.08    19.60    0.055    0.041
0.90-0.87     1522      672      577   85.9      2.6     47489.10    20.50    0.053    0.041
0.87-0.84     1415      664      577   86.9      2.5     39256.52    19.63    0.058    0.043
0.84-0.81     1200      672      586   87.2      2.0     32080.13    18.56    0.058    0.045
--------------------------------------------------------------------------------------------
 inf-0.81    16295     7222     5779   80.0      2.8     85792.12    25.51    0.069    0.031
DC PROFFITRRPTWIN INFO: Step 7 - Generating output files
 
HKLF 4
Reflections read=23694, from those 16295 with overlapping factor < 0.474 written to file D:\Data\xs0846a\twin_twin1_hklf4.hkl, 7399 skipped
Use the HKLF 4 file(s) for structure solution.

HKLF 5 merged
RINT ANALYSIS FOR ALL HKLF5 REFLECTIONS
 Components measured    kept     unique redundancy F2/sig(F2) Rint      Rsigma
------------------------------------------------------------------------------
1,2          23694     21157      8396     2.52     17.09     0.035     0.049

RINT ANALYSIS FOR OVERLAPPED REFLECTIONS
 Components measured    kept     unique redundancy F2/sig(F2) Rint      Rsigma
------------------------------------------------------------------------------
1,2          18900     16528      6134     2.69     18.52     0.034     0.047

RINT ANALYSIS FOR ISOLATED REFLECTIONS
 Component measured     kept     unique redundancy F2/sig(F2) Rint      Rsigma
------------------------------------------------------------------------------
     1        4794      4629      2262     2.05     11.55     0.040     0.071
     2           0         0         0     0.00      0.00     0.000     0.000

8396 merged reflections saved into file: D:\Data\xs0846a\twin_twin1_hklf5.hkl

Use this hkl file in SHELXL with BASF instruction, which has (components minus 1) entries, and HKLF 5 instruction.
E.g. Two component twin: 'BASF n2' in .ins file, BASF n1 can be computed as n1 = 1.0 - n2.
E.g. Three component twin: 'BASF n2 n3' in .ins file, BASF n1 can be computed as n1 = 1.0 - (n2 + n3).

BASF 0.33950 
;

loop_
 _atom_type_symbol
 _atom_type_description
 _atom_type_scat_dispersion_real
 _atom_type_scat_dispersion_imag
 _atom_type_scat_source
 'C'  'C'   0.0181   0.0091
 'International Tables Vol C Tables 4.2.6.8 and 6.1.1.4'
 'H'  'H'   0.0000   0.0000
 'International Tables Vol C Tables 4.2.6.8 and 6.1.1.4'
 'Au'  'Au'  -4.4197   7.2980
 'International Tables Vol C Tables 4.2.6.8 and 6.1.1.4'
 'Cl'  'Cl'   0.3639   0.7018
 'International Tables Vol C Tables 4.2.6.8 and 6.1.1.4'
 'O'  'O'   0.0492   0.0322
 'International Tables Vol C Tables 4.2.6.8 and 6.1.1.4'
 'P'  'P'   0.2955   0.4335
 'International Tables Vol C Tables 4.2.6.8 and 6.1.1.4'
 
_space_group_crystal_system       monoclinic
_space_group_IT_number            14
_space_group_name_H-M_alt         'P 21/c'
_space_group_name_Hall            '-P 2ybc'
 
_shelx_space_group_comment
;
The symmetry employed for this shelxl refinement is uniquely defined
by the following loop, which should always be used as a source of
symmetry information in preference to the above space-group names.
They are only intended as comments.
;
 
loop_
 _space_group_symop_operation_xyz
 'x, y, z'
 '-x, y+1/2, -z+1/2'
 '-x, -y, -z'
 'x, -y-1/2, z-1/2'
 
_cell_length_a                    8.9838(2)
_cell_length_b                    20.6008(5)
_cell_length_c                    19.6703(6)
_cell_angle_alpha                 90
_cell_angle_beta                  102.450(3)
_cell_angle_gamma                 90
_cell_volume                      3554.84(16)
_cell_formula_units_Z             4
_cell_measurement_temperature     110(2)
_cell_measurement_reflns_used     11926
_cell_measurement_theta_min       3.14
_cell_measurement_theta_max       72.12
 
_exptl_crystal_description        needle
_exptl_crystal_colour             colorless
_exptl_crystal_density_meas       ?
_exptl_crystal_density_method     ?
_exptl_crystal_density_diffrn     2.015          
_exptl_crystal_F_000              2053
_exptl_transmission_factor_min    ?
_exptl_transmission_factor_max    ?
_exptl_crystal_size_max           0.19
_exptl_crystal_size_mid           0.05
_exptl_crystal_size_min           0.03
_exptl_absorpt_coefficient_mu     18.373
_shelx_estimated_absorpt_T_min    ?
_shelx_estimated_absorpt_T_max    ?
_exptl_absorpt_correction_type    analytical
_exptl_absorpt_correction_T_min   0.154
_exptl_absorpt_correction_T_max   0.686
_exptl_absorpt_process_details    
;
CrysAlisPro, Agilent Technologies,
Version 1.171.37.35 (release 13-08-2014 CrysAlis171 .NET)
(compiled Aug 13 2014,18:06:01)
Analytical numeric absorption correction using a multifaceted crystal
			model based on expressions derived by R.C. Clark & J.S. Reid.
(Clark, R. C. & Reid, J. S. (1995). Acta Cryst. A51, 887-897)
Empirical absorption correction using spherical harmonics,
 implemented in SCALE3 ABSPACK scaling algorithm.
;
_exptl_absorpt_special_details    ?
_diffrn_ambient_temperature       110(2)
_diffrn_radiation_wavelength      1.54178
_diffrn_radiation_type            CuK\a
_diffrn_radiation_source          'SuperNova (Cu) X-ray Source' 
_diffrn_radiation_monochromator   'mirror' 
_diffrn_measurement_device_type   'SuperNova, Dual, Cu at zero, Atlas' 
_diffrn_measurement_method        '\w scans'
_diffrn_standards_number          '.'
_diffrn_standards_interval_time   '.'
_diffrn_standards_decay_%         '.'
_diffrn_reflns_number             21157
_diffrn_reflns_av_unetI/netI      0.0563
_diffrn_reflns_av_R_equivalents   0.0347
_diffrn_reflns_limit_h_min        -11
_diffrn_reflns_limit_h_max        9
_diffrn_reflns_limit_k_min        -25
_diffrn_reflns_limit_k_max        25
_diffrn_reflns_limit_l_min        -24
_diffrn_reflns_limit_l_max        24
_diffrn_reflns_theta_min          3.146
_diffrn_reflns_theta_max          71.898
_diffrn_reflns_theta_full         67.679
_diffrn_measured_fraction_theta_max   1.000
_diffrn_measured_fraction_theta_full  1.000
_diffrn_reflns_Laue_measured_fraction_max    1.000
_diffrn_reflns_Laue_measured_fraction_full   1.000
_diffrn_reflns_point_group_measured_fraction_max   1.000
_diffrn_reflns_point_group_measured_fraction_full  1.000
_reflns_number_total              8199
_reflns_number_gt                 7196
_reflns_threshold_expression      'I > 2\s(I)'
_reflns_Friedel_coverage          0.000
_reflns_Friedel_fraction_max      .
_reflns_Friedel_fraction_full     .
 
_reflns_special_details
;
 _reflns_Friedel_fraction is defined as the number of unique
 Friedel pairs measured divided by the number that would be
 possible theoretically, ignoring centric projections and
 systematic absences.
;
 
_computing_data_collection
;
CrysAlisPro, Agilent Technologies,
Version 1.171.37.35 (release 13-08-2014 CrysAlis171 .NET)
(compiled Aug 13 2014,18:06:01)
;
_computing_cell_refinement        
;
CrysAlisPro, Agilent Technologies,
Version 1.171.37.35 (release 13-08-2014 CrysAlis171 .NET)
(compiled Aug 13 2014,18:06:01)
;
_computing_data_reduction         
;
CrysAlisPro, Agilent Technologies,
Version 1.171.37.35 (release 13-08-2014 CrysAlis171 .NET)
(compiled Aug 13 2014,18:06:01)
;
_computing_structure_solution     'SHELXS-2014/7 (Sheldrick, 2015)'
_computing_structure_refinement   'SHELXL-2014/7 (Sheldrick, 2015)'
_computing_molecular_graphics     'SHELXTL v6.10 (Sheldrick, 2008)'
_computing_publication_material   'SHELXTL v6.10 (Sheldrick, 2008)'
_refine_special_details
;
 Refined as a 2-component twin.
;
_refine_ls_structure_factor_coef  Fsqd
_refine_ls_matrix_type            full
_refine_ls_weighting_scheme       calc
_refine_ls_weighting_details
'w=1/[\s^2^(Fo^2^)+(0.0423P)^2^] where P=(Fo^2^+2Fc^2^)/3'
_atom_sites_solution_primary      direct
_atom_sites_solution_secondary    difmap
_atom_sites_solution_hydrogens    geom
_refine_ls_hydrogen_treatment     constr
_refine_ls_extinction_method      none
_refine_ls_extinction_coef        .
_refine_ls_number_reflns          8199
_refine_ls_number_parameters      453
_refine_ls_number_restraints      102
_refine_ls_R_factor_all           0.0386
_refine_ls_R_factor_gt            0.0323
_refine_ls_wR_factor_ref          0.0783
_refine_ls_wR_factor_gt           0.0765
_refine_ls_goodness_of_fit_ref    0.992
_refine_ls_restrained_S_all       0.988
_refine_ls_shift/su_max           0.001
_refine_ls_shift/su_mean          0.000
 
loop_
 _atom_site_label
 _atom_site_type_symbol
 _atom_site_fract_x
 _atom_site_fract_y
 _atom_site_fract_z
 _atom_site_U_iso_or_equiv
 _atom_site_adp_type
 _atom_site_occupancy
 _atom_site_site_symmetry_order  
 _atom_site_calc_flag
 _atom_site_refinement_flags_posn
 _atom_site_refinement_flags_adp
 _atom_site_refinement_flags_occupancy
 _atom_site_disorder_assembly
 _atom_site_disorder_group
Au1 Au 0.33422(3) 0.21449(2) 0.28294(2) 0.01761(7) Uani 1 1 d . . . . .
Au2 Au 0.17095(3) 0.34165(2) 0.28696(2) 0.01763(7) Uani 1 1 d . . . . .
Cl1 Cl 0.46124(17) 0.25513(8) 0.20165(8) 0.0188(3) Uani 1 1 d . . . . .
Cl2 Cl 0.00876(17) 0.29461(8) 0.19027(9) 0.0204(3) Uani 1 1 d . . . . .
P1 P 0.24622(18) 0.15924(9) 0.36411(9) 0.0166(3) Uani 1 1 d . . . . .
P2 P 0.31432(18) 0.39670(9) 0.37593(10) 0.0172(3) Uani 1 1 d . . . . .
C1 C 0.4133(7) 0.2225(4) 0.4802(4) 0.0193(14) Uani 1 1 d . . . . .
C2 C 0.3843(7) 0.1626(4) 0.4453(4) 0.0174(13) Uani 1 1 d . . . . .
C3 C 0.4763(8) 0.1092(4) 0.4725(4) 0.0244(15) Uani 1 1 d . . . . .
H3 H 0.4609 0.0682 0.4500 0.029 Uiso 1 1 calc R U . . .
C4 C 0.5891(8) 0.1168(5) 0.5322(5) 0.0289(17) Uani 1 1 d . . . . .
H4 H 0.6510 0.0807 0.5503 0.035 Uiso 1 1 calc R U . . .
C5 C 0.6130(8) 0.1757(4) 0.5657(4) 0.0258(16) Uani 1 1 d . . . . .
H5 H 0.6900 0.1799 0.6070 0.031 Uiso 1 1 calc R U . . .
C6 C 0.5244(8) 0.2293(4) 0.5392(4) 0.0215(15) Uani 1 1 d . . . . .
H6 H 0.5412 0.2702 0.5619 0.026 Uiso 1 1 calc R U . . .
C7 C 0.2742(7) 0.3217(4) 0.4885(4) 0.0173(13) Uani 1 1 d . . . . .
C8 C 0.2604(7) 0.3842(4) 0.4584(4) 0.0167(13) Uani 1 1 d . . . . .
C9 C 0.2057(8) 0.4335(4) 0.4953(4) 0.0238(15) Uani 1 1 d . . . . .
H9 H 0.1967 0.4764 0.4771 0.029 Uiso 1 1 calc R U . . .
C10 C 0.1640(8) 0.4208(5) 0.5583(4) 0.0269(17) Uani 1 1 d . . . . .
H10 H 0.1276 0.4549 0.5830 0.032 Uiso 1 1 calc R U . . .
C11 C 0.1760(8) 0.3575(4) 0.5849(4) 0.0251(16) Uani 1 1 d . . . . .
H11 H 0.1457 0.3486 0.6273 0.030 Uiso 1 1 calc R U . . .
C12 C 0.2319(8) 0.3078(4) 0.5498(4) 0.0219(15) Uani 1 1 d . . . . .
H12 H 0.2406 0.2649 0.5679 0.026 Uiso 1 1 calc R U . . .
C13 C 0.2274(8) 0.0745(4) 0.3385(4) 0.0212(14) Uani 1 1 d . . . . .
C14 C 0.2994(9) 0.0510(4) 0.2878(5) 0.0319(18) Uani 1 1 d . . . . .
H14 H 0.3589 0.0796 0.2666 0.038 Uiso 1 1 calc R U . . .
C15 C 0.2859(11) -0.0130(5) 0.2678(6) 0.041(2) Uani 1 1 d . . . . .
H15 H 0.3382 -0.0283 0.2338 0.049 Uiso 1 1 calc R U . . .
C16 C 0.1991(9) -0.0548(4) 0.2957(5) 0.0329(18) Uani 1 1 d . . . . .
H16 H 0.1897 -0.0987 0.2808 0.039 Uiso 1 1 calc R U . . .
C17 C 0.1229(9) -0.0330(4) 0.3470(5) 0.0282(16) Uani 1 1 d . . . . .
H17 H 0.0615 -0.0619 0.3667 0.034 Uiso 1 1 calc R U . . .
C18 C 0.1389(8) 0.0322(4) 0.3686(5) 0.0264(16) Uani 1 1 d . . . . .
H18 H 0.0894 0.0474 0.4036 0.032 Uiso 1 1 calc R U . . .
C19 C 0.0663(8) 0.1794(4) 0.3851(4) 0.0187(14) Uani 1 1 d . . . . .
C20 C 0.0450(9) 0.1742(4) 0.4541(4) 0.0249(16) Uani 1 1 d . . . . .
H20 H 0.1281 0.1633 0.4911 0.030 Uiso 1 1 calc R U . . .
C21 C -0.0993(9) 0.1853(5) 0.4673(5) 0.0306(18) Uani 1 1 d . . . . .
H21 H -0.1148 0.1827 0.5135 0.037 Uiso 1 1 calc R U . . .
C22 C -0.2190(9) 0.1999(5) 0.4132(5) 0.034(2) Uani 1 1 d . . . . .
H22 H -0.3169 0.2073 0.4227 0.040 Uiso 1 1 calc R U . . .
C23 C -0.2008(8) 0.2041(4) 0.3456(5) 0.0281(17) Uani 1 1 d . . . . .
H23 H -0.2858 0.2134 0.3090 0.034 Uiso 1 1 calc R U . . .
C24 C -0.0572(8) 0.1945(4) 0.3310(4) 0.0212(14) Uani 1 1 d . . . . .
H24 H -0.0434 0.1983 0.2846 0.025 Uiso 1 1 calc R U . . .
C25 C 0.2945(8) 0.4836(4) 0.3583(4) 0.0224(15) Uani 1 1 d . . . . .
C26 C 0.4207(9) 0.5252(4) 0.3690(4) 0.0229(15) Uani 1 1 d . . . . .
H26 H 0.5198 0.5083 0.3871 0.027 Uiso 1 1 calc R U . . .
C27 C 0.4020(9) 0.5908(4) 0.3535(4) 0.0251(15) Uani 1 1 d . . . . .
H27 H 0.4881 0.6187 0.3601 0.030 Uiso 1 1 calc R U . . .
C28 C 0.2549(10) 0.6157(4) 0.3280(4) 0.0295(17) Uani 1 1 d . . . . .
H28 H 0.2413 0.6605 0.3172 0.035 Uiso 1 1 calc R U . . .
C29 C 0.1296(9) 0.5747(4) 0.3185(4) 0.0297(17) Uani 1 1 d . . . . .
H29 H 0.0303 0.5918 0.3017 0.036 Uiso 1 1 calc R U . . .
C30 C 0.1480(8) 0.5081(4) 0.3334(4) 0.0229(15) Uani 1 1 d . . . . .
H30 H 0.0620 0.4802 0.3267 0.027 Uiso 1 1 calc R U . . .
C31 C 0.5167(8) 0.3816(4) 0.3942(4) 0.0198(14) Uani 1 1 d . . . . .
C32 C 0.5885(8) 0.3645(4) 0.3410(4) 0.0214(14) Uani 1 1 d . . . . .
H32 H 0.5302 0.3588 0.2950 0.026 Uiso 1 1 calc R U . . .
C33 C 0.7466(9) 0.3556(4) 0.3550(5) 0.0306(18) Uani 1 1 d . . . . .
H33 H 0.7952 0.3436 0.3185 0.037 Uiso 1 1 calc R U . . .
C34 C 0.8331(8) 0.3642(4) 0.4222(5) 0.0304(18) Uani 1 1 d . . . . .
H34 H 0.9405 0.3585 0.4314 0.037 Uiso 1 1 calc R U . . .
C35 C 0.7608(9) 0.3813(4) 0.4761(5) 0.0284(17) Uani 1 1 d . . . . .
H35 H 0.8188 0.3870 0.5222 0.034 Uiso 1 1 calc R U . . .
C36 C 0.6050(8) 0.3898(4) 0.4618(4) 0.0258(16) Uani 1 1 d . . . . .
H36 H 0.5564 0.4015 0.4984 0.031 Uiso 1 1 calc R U . . .
O1 O 0.3258(5) 0.2745(3) 0.4479(3) 0.0193(10) Uani 1 1 d . . . . .
C1S C 0.317(5) 0.0217(7) 0.6144(9) 0.042(4) Uani 0.279(3) 1 d D U P A 1
H1S H 0.4189 0.0131 0.6037 0.051 Uiso 0.279(3) 1 calc R U P A 1
Cl3 Cl 0.2916(14) -0.0314(6) 0.6826(5) 0.043(2) Uani 0.279(3) 1 d D U P A 1
Cl4 Cl 0.3098(17) 0.1042(4) 0.6407(9) 0.037(2) Uani 0.279(3) 1 d D U P A 1
Cl5 Cl 0.173(2) 0.0055(7) 0.5386(10) 0.059(3) Uani 0.279(3) 1 d D U P A 1
C2S C 0.275(2) -0.0309(9) 0.6512(11) 0.047(4) Uani 0.721(3) 1 d D U P B 2
H2S1 H 0.1829 -0.0576 0.6403 0.071 Uiso 0.721(3) 1 calc R U P B 2
H2S2 H 0.2911 -0.0156 0.6995 0.071 Uiso 0.721(3) 1 calc R U P B 2
H2S3 H 0.3632 -0.0568 0.6455 0.071 Uiso 0.721(3) 1 calc R U P B 2
C3S C 0.2576(14) 0.0261(6) 0.6032(8) 0.042(3) Uani 0.721(3) 1 d D U P B 2
C4S C 0.322(3) 0.0867(9) 0.6395(17) 0.037(2) Uani 0.721(3) 1 d D U P B 2
H4S1 H 0.4027 0.0755 0.6798 0.056 Uiso 0.721(3) 1 calc R U P B 2
H4S2 H 0.2413 0.1106 0.6551 0.056 Uiso 0.721(3) 1 calc R U P B 2
H4S3 H 0.3646 0.1138 0.6074 0.056 Uiso 0.721(3) 1 calc R U P B 2
O1S O 0.198(2) 0.0223(8) 0.5432(12) 0.059(3) Uani 0.721(3) 1 d . U P B 2
 
loop_
 _atom_site_aniso_label
 _atom_site_aniso_U_11
 _atom_site_aniso_U_22
 _atom_site_aniso_U_33
 _atom_site_aniso_U_23
 _atom_site_aniso_U_13
 _atom_site_aniso_U_12
Au1 0.01598(12) 0.01841(13) 0.01852(13) -0.00055(11) 0.00391(9) 0.00094(10)
Au2 0.01432(12) 0.01779(13) 0.01907(13) -0.00111(11) -0.00020(9) -0.00060(9)
Cl1 0.0201(7) 0.0221(8) 0.0160(7) 0.0008(6) 0.0077(6) -0.0005(5)
Cl2 0.0171(7) 0.0191(8) 0.0195(7) -0.0023(6) -0.0082(5) -0.0014(5)
P1 0.0133(7) 0.0170(8) 0.0196(8) 0.0015(6) 0.0034(6) -0.0001(6)
P2 0.0136(7) 0.0187(8) 0.0189(8) -0.0020(6) 0.0023(6) -0.0011(6)
C1 0.011(3) 0.020(4) 0.029(4) 0.000(3) 0.009(3) 0.003(3)
C2 0.011(3) 0.024(4) 0.017(3) 0.001(3) 0.002(2) -0.002(3)
C3 0.020(3) 0.025(4) 0.029(4) 0.007(3) 0.008(3) 0.002(3)
C4 0.014(3) 0.037(5) 0.033(4) 0.007(4) 0.001(3) 0.002(3)
C5 0.016(3) 0.037(5) 0.024(4) 0.004(3) 0.001(3) 0.001(3)
C6 0.014(3) 0.033(4) 0.018(3) -0.006(3) 0.006(3) -0.001(3)
C7 0.009(3) 0.022(4) 0.019(3) -0.002(3) 0.001(2) 0.003(2)
C8 0.007(3) 0.023(4) 0.018(3) -0.007(3) -0.003(2) -0.002(2)
C9 0.019(3) 0.024(4) 0.028(4) -0.001(3) 0.005(3) -0.003(3)
C10 0.017(3) 0.042(5) 0.024(4) -0.010(3) 0.008(3) 0.001(3)
C11 0.014(3) 0.040(5) 0.020(4) 0.001(3) 0.001(3) -0.001(3)
C12 0.014(3) 0.029(4) 0.021(4) 0.007(3) 0.000(3) 0.001(3)
C13 0.015(3) 0.019(3) 0.029(4) -0.001(3) 0.002(3) 0.000(3)
C14 0.027(4) 0.030(4) 0.040(5) -0.007(4) 0.012(3) -0.005(3)
C15 0.048(5) 0.027(5) 0.052(6) -0.007(4) 0.020(4) 0.004(4)
C16 0.027(4) 0.025(4) 0.043(5) -0.001(3) -0.001(4) -0.001(3)
C17 0.022(3) 0.021(4) 0.039(4) 0.004(3) 0.003(3) 0.000(3)
C18 0.020(3) 0.019(4) 0.041(4) 0.007(3) 0.007(3) -0.001(3)
C19 0.018(3) 0.021(4) 0.019(3) 0.001(3) 0.008(3) -0.002(2)
C20 0.021(4) 0.035(4) 0.021(4) 0.003(3) 0.009(3) -0.003(3)
C21 0.020(4) 0.042(5) 0.030(4) 0.006(4) 0.006(3) -0.001(3)
C22 0.014(3) 0.042(5) 0.045(5) -0.003(4) 0.008(3) 0.001(3)
C23 0.014(3) 0.029(4) 0.040(5) -0.004(3) 0.003(3) -0.004(3)
C24 0.016(3) 0.025(4) 0.021(3) -0.001(3) -0.001(3) 0.002(3)
C25 0.025(4) 0.016(3) 0.026(4) 0.000(3) 0.003(3) 0.000(3)
C26 0.025(3) 0.021(4) 0.021(3) -0.002(3) 0.003(3) -0.002(3)
C27 0.029(4) 0.021(4) 0.025(4) -0.003(3) 0.006(3) -0.007(3)
C28 0.034(4) 0.028(4) 0.024(4) 0.005(3) 0.002(3) 0.002(3)
C29 0.024(4) 0.035(5) 0.027(4) 0.006(3) -0.001(3) 0.004(3)
C30 0.020(3) 0.019(4) 0.030(4) 0.004(3) 0.004(3) 0.005(3)
C31 0.020(3) 0.019(3) 0.019(3) 0.001(3) 0.000(3) 0.001(3)
C32 0.023(3) 0.020(3) 0.021(3) 0.001(3) 0.005(3) -0.002(3)
C33 0.025(4) 0.026(4) 0.044(5) 0.002(4) 0.015(4) -0.001(3)
C34 0.014(3) 0.026(4) 0.050(5) 0.001(4) 0.003(3) -0.001(3)
C35 0.022(4) 0.033(5) 0.028(4) -0.005(3) -0.001(3) -0.001(3)
C36 0.019(3) 0.030(4) 0.024(4) -0.003(3) -0.005(3) -0.004(3)
O1 0.020(2) 0.020(3) 0.019(2) -0.002(2) 0.0043(18) 0.0007(19)
C1S 0.059(8) 0.030(7) 0.037(7) -0.003(7) 0.009(7) -0.017(7)
Cl3 0.049(5) 0.046(5) 0.033(5) 0.014(5) 0.010(4) -0.003(4)
Cl4 0.053(4) 0.016(6) 0.046(3) -0.002(5) 0.017(3) -0.001(5)
Cl5 0.092(6) 0.041(7) 0.032(3) 0.000(5) -0.015(4) -0.039(5)
C2S 0.045(7) 0.043(7) 0.056(9) 0.011(9) 0.013(8) -0.006(6)
C3S 0.061(7) 0.031(5) 0.033(5) -0.006(4) 0.010(5) -0.017(5)
C4S 0.053(4) 0.016(6) 0.046(3) -0.002(5) 0.017(3) -0.001(5)
O1S 0.092(6) 0.041(7) 0.032(3) 0.000(5) -0.015(4) -0.039(5)
 
_geom_special_details
;
 All esds (except the esd in the dihedral angle between two l.s. planes)
 are estimated using the full covariance matrix.  The cell esds are taken
 into account individually in the estimation of esds in distances, angles
 and torsion angles; correlations between esds in cell parameters are only
 used when they are defined by crystal symmetry.  An approximate (isotropic)
 treatment of cell esds is used for estimating esds involving l.s. planes.
;
 
loop_
 _geom_bond_atom_site_label_1
 _geom_bond_atom_site_label_2
 _geom_bond_distance
 _geom_bond_site_symmetry_2
 _geom_bond_publ_flag
Au1 P1 2.2393(17) . ?
Au1 Cl1 2.3122(15) . ?
Au1 Au2 3.0116(4) . ?
Au2 P2 2.2441(18) . ?
Au2 Cl2 2.3419(15) . ?
P1 C2 1.800(7) . ?
P1 C19 1.801(7) . ?
P1 C13 1.814(8) . ?
P2 C31 1.803(7) . ?
P2 C8 1.809(7) . ?
P2 C25 1.825(8) . ?
C1 C6 1.364(10) . ?
C1 O1 1.398(9) . ?
C1 C2 1.410(11) . ?
C2 C3 1.410(10) . ?
C3 C4 1.385(12) . ?
C3 H3 0.9500 . ?
C4 C5 1.376(13) . ?
C4 H4 0.9500 . ?
C5 C6 1.396(11) . ?
C5 H5 0.9500 . ?
C6 H6 0.9500 . ?
C7 C12 1.370(10) . ?
C7 O1 1.398(8) . ?
C7 C8 1.411(11) . ?
C8 C9 1.397(10) . ?
C9 C10 1.394(11) . ?
C9 H9 0.9500 . ?
C10 C11 1.400(13) . ?
C10 H10 0.9500 . ?
C11 C12 1.390(12) . ?
C11 H11 0.9500 . ?
C12 H12 0.9500 . ?
C13 C14 1.388(11) . ?
C13 C18 1.394(11) . ?
C14 C15 1.375(13) . ?
C14 H14 0.9500 . ?
C15 C16 1.354(14) . ?
C15 H15 0.9500 . ?
C16 C17 1.409(13) . ?
C16 H16 0.9500 . ?
C17 C18 1.407(12) . ?
C17 H17 0.9500 . ?
C18 H18 0.9500 . ?
C19 C24 1.398(10) . ?
C19 C20 1.415(10) . ?
C20 C21 1.395(11) . ?
C20 H20 0.9500 . ?
C21 C22 1.373(13) . ?
C21 H21 0.9500 . ?
C22 C23 1.377(13) . ?
C22 H22 0.9500 . ?
C23 C24 1.395(10) . ?
C23 H23 0.9500 . ?
C24 H24 0.9500 . ?
C25 C30 1.396(10) . ?
C25 C26 1.400(10) . ?
C26 C27 1.389(11) . ?
C26 H26 0.9500 . ?
C27 C28 1.406(12) . ?
C27 H27 0.9500 . ?
C28 C29 1.387(12) . ?
C28 H28 0.9500 . ?
C29 C30 1.405(12) . ?
C29 H29 0.9500 . ?
C30 H30 0.9500 . ?
C31 C32 1.387(10) . ?
C31 C36 1.405(11) . ?
C32 C33 1.400(11) . ?
C32 H32 0.9500 . ?
C33 C34 1.392(13) . ?
C33 H33 0.9500 . ?
C34 C35 1.403(13) . ?
C34 H34 0.9500 . ?
C35 C36 1.378(11) . ?
C35 H35 0.9500 . ?
C36 H36 0.9500 . ?
C1S Cl5 1.78(2) . ?
C1S Cl3 1.783(19) . ?
C1S Cl4 1.78(2) . ?
C1S H1S 1.0000 . ?
C2S C3S 1.494(18) . ?
C2S H2S1 0.9800 . ?
C2S H2S2 0.9800 . ?
C2S H2S3 0.9800 . ?
C3S O1S 1.19(3) . ?
C3S C4S 1.491(19) . ?
C4S H4S1 0.9800 . ?
C4S H4S2 0.9800 . ?
C4S H4S3 0.9800 . ?
 
loop_
 _geom_angle_atom_site_label_1
 _geom_angle_atom_site_label_2
 _geom_angle_atom_site_label_3
 _geom_angle
 _geom_angle_site_symmetry_1
 _geom_angle_site_symmetry_3
 _geom_angle_publ_flag
P1 Au1 Cl1 168.48(6) . . ?
P1 Au1 Au2 100.06(5) . . ?
Cl1 Au1 Au2 91.09(4) . . ?
P2 Au2 Cl2 173.97(7) . . ?
P2 Au2 Au1 105.02(5) . . ?
Cl2 Au2 Au1 80.79(4) . . ?
C2 P1 C19 105.6(3) . . ?
C2 P1 C13 106.7(4) . . ?
C19 P1 C13 104.5(3) . . ?
C2 P1 Au1 109.4(2) . . ?
C19 P1 Au1 121.3(3) . . ?
C13 P1 Au1 108.5(3) . . ?
C31 P2 C8 104.5(3) . . ?
C31 P2 C25 105.1(3) . . ?
C8 P2 C25 106.0(4) . . ?
C31 P2 Au2 116.9(3) . . ?
C8 P2 Au2 114.1(2) . . ?
C25 P2 Au2 109.3(3) . . ?
C6 C1 O1 122.9(7) . . ?
C6 C1 C2 121.9(7) . . ?
O1 C1 C2 115.1(6) . . ?
C1 C2 C3 117.8(7) . . ?
C1 C2 P1 119.0(6) . . ?
C3 C2 P1 122.9(6) . . ?
C4 C3 C2 119.8(8) . . ?
C4 C3 H3 120.1 . . ?
C2 C3 H3 120.1 . . ?
C5 C4 C3 121.0(8) . . ?
C5 C4 H4 119.5 . . ?
C3 C4 H4 119.5 . . ?
C4 C5 C6 120.1(7) . . ?
C4 C5 H5 119.9 . . ?
C6 C5 H5 119.9 . . ?
C1 C6 C5 119.3(8) . . ?
C1 C6 H6 120.3 . . ?
C5 C6 H6 120.3 . . ?
C12 C7 O1 123.0(7) . . ?
C12 C7 C8 122.9(7) . . ?
O1 C7 C8 113.9(6) . . ?
C9 C8 C7 117.1(7) . . ?
C9 C8 P2 123.6(6) . . ?
C7 C8 P2 119.3(5) . . ?
C10 C9 C8 121.1(8) . . ?
C10 C9 H9 119.5 . . ?
C8 C9 H9 119.5 . . ?
C9 C10 C11 119.6(8) . . ?
C9 C10 H10 120.2 . . ?
C11 C10 H10 120.2 . . ?
C12 C11 C10 120.5(7) . . ?
C12 C11 H11 119.7 . . ?
C10 C11 H11 119.7 . . ?
C7 C12 C11 118.8(7) . . ?
C7 C12 H12 120.6 . . ?
C11 C12 H12 120.6 . . ?
C14 C13 C18 118.9(8) . . ?
C14 C13 P1 120.3(6) . . ?
C18 C13 P1 120.7(6) . . ?
C15 C14 C13 121.0(8) . . ?
C15 C14 H14 119.5 . . ?
C13 C14 H14 119.5 . . ?
C16 C15 C14 121.1(9) . . ?
C16 C15 H15 119.5 . . ?
C14 C15 H15 119.5 . . ?
C15 C16 C17 120.0(9) . . ?
C15 C16 H16 120.0 . . ?
C17 C16 H16 120.0 . . ?
C18 C17 C16 119.1(8) . . ?
C18 C17 H17 120.4 . . ?
C16 C17 H17 120.4 . . ?
C13 C18 C17 119.9(8) . . ?
C13 C18 H18 120.0 . . ?
C17 C18 H18 120.0 . . ?
C24 C19 C20 119.9(7) . . ?
C24 C19 P1 118.7(5) . . ?
C20 C19 P1 121.1(6) . . ?
C21 C20 C19 119.3(8) . . ?
C21 C20 H20 120.4 . . ?
C19 C20 H20 120.4 . . ?
C22 C21 C20 119.7(8) . . ?
C22 C21 H21 120.1 . . ?
C20 C21 H21 120.1 . . ?
C21 C22 C23 121.7(7) . . ?
C21 C22 H22 119.1 . . ?
C23 C22 H22 119.1 . . ?
C22 C23 C24 119.9(8) . . ?
C22 C23 H23 120.1 . . ?
C24 C23 H23 120.1 . . ?
C23 C24 C19 119.5(7) . . ?
C23 C24 H24 120.3 . . ?
C19 C24 H24 120.3 . . ?
C30 C25 C26 120.2(7) . . ?
C30 C25 P2 117.9(6) . . ?
C26 C25 P2 121.9(6) . . ?
C27 C26 C25 120.4(7) . . ?
C27 C26 H26 119.8 . . ?
C25 C26 H26 119.8 . . ?
C26 C27 C28 119.6(7) . . ?
C26 C27 H27 120.2 . . ?
C28 C27 H27 120.2 . . ?
C29 C28 C27 120.0(8) . . ?
C29 C28 H28 120.0 . . ?
C27 C28 H28 120.0 . . ?
C28 C29 C30 120.7(7) . . ?
C28 C29 H29 119.7 . . ?
C30 C29 H29 119.7 . . ?
C25 C30 C29 119.1(7) . . ?
C25 C30 H30 120.4 . . ?
C29 C30 H30 120.4 . . ?
C32 C31 C36 119.1(7) . . ?
C32 C31 P2 120.4(6) . . ?
C36 C31 P2 120.4(6) . . ?
C31 C32 C33 120.1(8) . . ?
C31 C32 H32 120.0 . . ?
C33 C32 H32 120.0 . . ?
C34 C33 C32 120.4(8) . . ?
C34 C33 H33 119.8 . . ?
C32 C33 H33 119.8 . . ?
C33 C34 C35 119.6(7) . . ?
C33 C34 H34 120.2 . . ?
C35 C34 H34 120.2 . . ?
C36 C35 C34 119.6(8) . . ?
C36 C35 H35 120.2 . . ?
C34 C35 H35 120.2 . . ?
C35 C36 C31 121.3(8) . . ?
C35 C36 H36 119.4 . . ?
C31 C36 H36 119.4 . . ?
C7 O1 C1 119.8(6) . . ?
Cl5 C1S Cl3 109.2(18) . . ?
Cl5 C1S Cl4 110.8(19) . . ?
Cl3 C1S Cl4 110.4(18) . . ?
Cl5 C1S H1S 108.8 . . ?
Cl3 C1S H1S 108.8 . . ?
Cl4 C1S H1S 108.8 . . ?
C3S C2S H2S1 109.5 . . ?
C3S C2S H2S2 109.5 . . ?
H2S1 C2S H2S2 109.5 . . ?
C3S C2S H2S3 109.5 . . ?
H2S1 C2S H2S3 109.5 . . ?
H2S2 C2S H2S3 109.5 . . ?
O1S C3S C4S 125(2) . . ?
O1S C3S C2S 122.6(15) . . ?
C4S C3S C2S 112.2(18) . . ?
C3S C4S H4S1 109.5 . . ?
C3S C4S H4S2 109.5 . . ?
H4S1 C4S H4S2 109.5 . . ?
C3S C4S H4S3 109.5 . . ?
H4S1 C4S H4S3 109.5 . . ?
H4S2 C4S H4S3 109.5 . . ?
 
loop_
 _geom_torsion_atom_site_label_1
 _geom_torsion_atom_site_label_2
 _geom_torsion_atom_site_label_3
 _geom_torsion_atom_site_label_4
 _geom_torsion
 _geom_torsion_site_symmetry_1
 _geom_torsion_site_symmetry_2
 _geom_torsion_site_symmetry_3
 _geom_torsion_site_symmetry_4
 _geom_torsion_publ_flag
C6 C1 C2 C3 -1.2(10) . . . . ?
O1 C1 C2 C3 175.6(6) . . . . ?
C6 C1 C2 P1 -175.1(5) . . . . ?
O1 C1 C2 P1 1.8(8) . . . . ?
C19 P1 C2 C1 -64.5(6) . . . . ?
C13 P1 C2 C1 -175.3(5) . . . . ?
Au1 P1 C2 C1 67.5(5) . . . . ?
C19 P1 C2 C3 121.9(6) . . . . ?
C13 P1 C2 C3 11.1(7) . . . . ?
Au1 P1 C2 C3 -106.1(6) . . . . ?
C1 C2 C3 C4 0.9(10) . . . . ?
P1 C2 C3 C4 174.5(6) . . . . ?
C2 C3 C4 C5 0.1(12) . . . . ?
C3 C4 C5 C6 -0.9(12) . . . . ?
O1 C1 C6 C5 -176.1(6) . . . . ?
C2 C1 C6 C5 0.5(10) . . . . ?
C4 C5 C6 C1 0.6(11) . . . . ?
C12 C7 C8 C9 2.3(10) . . . . ?
O1 C7 C8 C9 178.4(6) . . . . ?
C12 C7 C8 P2 -178.1(5) . . . . ?
O1 C7 C8 P2 -1.9(8) . . . . ?
C31 P2 C8 C9 114.7(6) . . . . ?
C25 P2 C8 C9 3.9(6) . . . . ?
Au2 P2 C8 C9 -116.5(5) . . . . ?
C31 P2 C8 C7 -65.0(6) . . . . ?
C25 P2 C8 C7 -175.7(5) . . . . ?
Au2 P2 C8 C7 63.9(5) . . . . ?
C7 C8 C9 C10 -1.2(10) . . . . ?
P2 C8 C9 C10 179.1(6) . . . . ?
C8 C9 C10 C11 -0.5(11) . . . . ?
C9 C10 C11 C12 1.3(11) . . . . ?
O1 C7 C12 C11 -177.3(6) . . . . ?
C8 C7 C12 C11 -1.5(10) . . . . ?
C10 C11 C12 C7 -0.3(11) . . . . ?
C2 P1 C13 C14 -101.6(7) . . . . ?
C19 P1 C13 C14 146.8(7) . . . . ?
Au1 P1 C13 C14 16.1(7) . . . . ?
C2 P1 C13 C18 79.3(7) . . . . ?
C19 P1 C13 C18 -32.2(7) . . . . ?
Au1 P1 C13 C18 -162.9(6) . . . . ?
C18 C13 C14 C15 -0.8(13) . . . . ?
P1 C13 C14 C15 -179.8(8) . . . . ?
C13 C14 C15 C16 1.5(16) . . . . ?
C14 C15 C16 C17 -1.0(15) . . . . ?
C15 C16 C17 C18 -0.2(13) . . . . ?
C14 C13 C18 C17 -0.5(12) . . . . ?
P1 C13 C18 C17 178.6(6) . . . . ?
C16 C17 C18 C13 1.0(12) . . . . ?
C2 P1 C19 C24 166.3(6) . . . . ?
C13 P1 C19 C24 -81.3(7) . . . . ?
Au1 P1 C19 C24 41.4(7) . . . . ?
C2 P1 C19 C20 -19.6(8) . . . . ?
C13 P1 C19 C20 92.8(7) . . . . ?
Au1 P1 C19 C20 -144.4(6) . . . . ?
C24 C19 C20 C21 -0.8(13) . . . . ?
P1 C19 C20 C21 -174.9(7) . . . . ?
C19 C20 C21 C22 1.1(14) . . . . ?
C20 C21 C22 C23 -0.1(15) . . . . ?
C21 C22 C23 C24 -1.2(14) . . . . ?
C22 C23 C24 C19 1.4(13) . . . . ?
C20 C19 C24 C23 -0.4(12) . . . . ?
P1 C19 C24 C23 173.8(6) . . . . ?
C31 P2 C25 C30 171.8(7) . . . . ?
C8 P2 C25 C30 -77.9(7) . . . . ?
Au2 P2 C25 C30 45.5(7) . . . . ?
C31 P2 C25 C26 -8.3(8) . . . . ?
C8 P2 C25 C26 102.0(7) . . . . ?
Au2 P2 C25 C26 -134.6(6) . . . . ?
C30 C25 C26 C27 -1.6(12) . . . . ?
P2 C25 C26 C27 178.5(6) . . . . ?
C25 C26 C27 C28 1.1(12) . . . . ?
C26 C27 C28 C29 0.1(13) . . . . ?
C27 C28 C29 C30 -0.7(13) . . . . ?
C26 C25 C30 C29 1.0(12) . . . . ?
P2 C25 C30 C29 -179.1(6) . . . . ?
C28 C29 C30 C25 0.2(13) . . . . ?
C8 P2 C31 C32 157.5(6) . . . . ?
C25 P2 C31 C32 -91.1(7) . . . . ?
Au2 P2 C31 C32 30.4(7) . . . . ?
C8 P2 C31 C36 -25.4(8) . . . . ?
C25 P2 C31 C36 86.0(7) . . . . ?
Au2 P2 C31 C36 -152.6(6) . . . . ?
C36 C31 C32 C33 0.1(12) . . . . ?
P2 C31 C32 C33 177.2(6) . . . . ?
C31 C32 C33 C34 -0.4(13) . . . . ?
C32 C33 C34 C35 0.6(13) . . . . ?
C33 C34 C35 C36 -0.4(14) . . . . ?
C34 C35 C36 C31 0.1(14) . . . . ?
C32 C31 C36 C35 0.1(13) . . . . ?
P2 C31 C36 C35 -177.0(7) . . . . ?
C12 C7 O1 C1 -35.1(9) . . . . ?
C8 C7 O1 C1 148.8(6) . . . . ?
C6 C1 O1 C7 -40.3(9) . . . . ?
C2 C1 O1 C7 142.9(6) . . . . ?
 
_refine_diff_density_max    1.182
_refine_diff_density_min   -1.391
_refine_diff_density_rms    0.189

_shelx_res_file
;

    xs0846a.res created by SHELXL-2014/7


TITL xs0846a
CELL  1.54178    8.9838   20.6008   19.6703    90.000   102.450    90.000
ZERR        4    0.0002    0.0005    0.0006     0.000     0.003     0.000
LATT   1
SYMM             - X ,    0.50000 + Y ,    0.50000 - Z
SFAC  C  H  Au  Cl  O  P
UNIT   153.76   130.44   8   11.36   6.89   8

TEMP -163

ACTA
HTAB
BOND
BOND $H
CONF
WPDB

L.S. 6
FMAP 2
PLAN 10
OMIT -2 143.8
OMIT  2   1  -6
OMIT -1   2 -23

MERG 0

WGHT    0.042300
BASF   0.32716
FVAR       1.77408   0.27889   0.72110
PART 0
rem Au-Au complex
AU1   3    0.334219    0.214494    0.282938    11.00000    0.01598    0.01841 =
         0.01852   -0.00055    0.00391    0.00094
AU2   3    0.170953    0.341654    0.286959    11.00000    0.01432    0.01779 =
         0.01907   -0.00111   -0.00020   -0.00060
CL1   4    0.461241    0.255129    0.201650    11.00000    0.02011    0.02211 =
         0.01601    0.00078    0.00768   -0.00051
CL2   4    0.008761    0.294611    0.190274    11.00000    0.01705    0.01910 =
         0.01947   -0.00229   -0.00816   -0.00138
P1    6    0.246218    0.159240    0.364111    11.00000    0.01328    0.01699 =
         0.01956    0.00150    0.00338   -0.00006
P2    6    0.314321    0.396697    0.375934    11.00000    0.01360    0.01868 =
         0.01889   -0.00197    0.00229   -0.00107
C1    1    0.413343    0.222521    0.480196    11.00000    0.01134    0.01972 =
         0.02871   -0.00026    0.00860    0.00266
C2    1    0.384258    0.162566    0.445293    11.00000    0.01087    0.02448 =
         0.01657    0.00111    0.00241   -0.00245
C3    1    0.476253    0.109197    0.472527    11.00000    0.01977    0.02532 =
         0.02915    0.00689    0.00761    0.00218
AFIX  43
H3    2    0.460876    0.068192    0.450008    11.00000   -1.20000
AFIX   0
C4    1    0.589098    0.116769    0.532219    11.00000    0.01415    0.03737 =
         0.03343    0.00677    0.00143    0.00229
AFIX  43
H4    2    0.650979    0.080706    0.550328    11.00000   -1.20000
AFIX   0
C5    1    0.613010    0.175695    0.565712    11.00000    0.01582    0.03653 =
         0.02392    0.00406    0.00149    0.00106
AFIX  43
H5    2    0.689976    0.179882    0.606982    11.00000   -1.20000
AFIX   0
C6    1    0.524388    0.229348    0.539169    11.00000    0.01437    0.03285 =
         0.01814   -0.00642    0.00566   -0.00145
AFIX  43
H6    2    0.541228    0.270200    0.561937    11.00000   -1.20000
AFIX   0
C7    1    0.274241    0.321689    0.488481    11.00000    0.00942    0.02225 =
         0.01900   -0.00180    0.00057    0.00254
C8    1    0.260406    0.384209    0.458435    11.00000    0.00748    0.02280 =
         0.01755   -0.00698   -0.00253   -0.00231
C9    1    0.205678    0.433515    0.495278    11.00000    0.01944    0.02432 =
         0.02771   -0.00123    0.00515   -0.00280
AFIX  43
H9    2    0.196737    0.476407    0.477113    11.00000   -1.20000
AFIX   0
C10   1    0.163968    0.420807    0.558268    11.00000    0.01676    0.04185 =
         0.02366   -0.01036    0.00772    0.00097
AFIX  43
H10   2    0.127635    0.454851    0.582951    11.00000   -1.20000
AFIX   0
C11   1    0.175985    0.357548    0.584895    11.00000    0.01408    0.03966 =
         0.02032    0.00051    0.00114   -0.00109
AFIX  43
H11   2    0.145683    0.348581    0.627318    11.00000   -1.20000
AFIX   0
C12   1    0.231905    0.307755    0.549754    11.00000    0.01404    0.02925 =
         0.02063    0.00744    0.00011    0.00077
AFIX  43
H12   2    0.240609    0.264851    0.567887    11.00000   -1.20000
AFIX   0
C13   1    0.227400    0.074532    0.338532    11.00000    0.01464    0.01895 =
         0.02891   -0.00145    0.00231    0.00045
C14   1    0.299402    0.051027    0.287815    11.00000    0.02747    0.03022 =
         0.04010   -0.00704    0.01174   -0.00516
AFIX  43
H14   2    0.358912    0.079615    0.266624    11.00000   -1.20000
AFIX   0
C15   1    0.285859   -0.013046    0.267786    11.00000    0.04799    0.02677 =
         0.05170   -0.00729    0.01993    0.00409
AFIX  43
H15   2    0.338214   -0.028274    0.233788    11.00000   -1.20000
AFIX   0
C16   1    0.199109   -0.054776    0.295744    11.00000    0.02703    0.02459 =
         0.04322   -0.00093   -0.00104   -0.00081
AFIX  43
H16   2    0.189659   -0.098725    0.280807    11.00000   -1.20000
AFIX   0
C17   1    0.122888   -0.032979    0.346989    11.00000    0.02195    0.02142 =
         0.03943    0.00386    0.00268    0.00025
AFIX  43
H17   2    0.061504   -0.061929    0.366710    11.00000   -1.20000
AFIX   0
C18   1    0.138869    0.032235    0.368583    11.00000    0.02006    0.01874 =
         0.04073    0.00654    0.00719   -0.00127
AFIX  43
H18   2    0.089380    0.047435    0.403610    11.00000   -1.20000
AFIX   0
C19   1    0.066301    0.179352    0.385147    11.00000    0.01834    0.02085 =
         0.01875    0.00131    0.00818   -0.00195
C20   1    0.045024    0.174205    0.454144    11.00000    0.02079    0.03504 =
         0.02095    0.00259    0.00901   -0.00323
AFIX  43
H20   2    0.128150    0.163332    0.491113    11.00000   -1.20000
AFIX   0
C21   1   -0.099322    0.185268    0.467293    11.00000    0.02031    0.04193 =
         0.02980    0.00611    0.00594   -0.00071
AFIX  43
H21   2   -0.114794    0.182715    0.513495    11.00000   -1.20000
AFIX   0
C22   1   -0.218955    0.199861    0.413201    11.00000    0.01443    0.04231 =
         0.04496   -0.00330    0.00759    0.00123
AFIX  43
H22   2   -0.316893    0.207257    0.422655    11.00000   -1.20000
AFIX   0
C23   1   -0.200753    0.204061    0.345613    11.00000    0.01401    0.02868 =
         0.04020   -0.00352    0.00270   -0.00384
AFIX  43
H23   2   -0.285821    0.213433    0.309008    11.00000   -1.20000
AFIX   0
C24   1   -0.057180    0.194529    0.330998    11.00000    0.01555    0.02540 =
         0.02067   -0.00051   -0.00081    0.00202
AFIX  43
H24   2   -0.043418    0.198320    0.284613    11.00000   -1.20000
AFIX   0
C25   1    0.294468    0.483604    0.358255    11.00000    0.02467    0.01573 =
         0.02586    0.00027    0.00319   -0.00008
C26   1    0.420707    0.525172    0.369047    11.00000    0.02532    0.02137 =
         0.02092   -0.00182    0.00280   -0.00166
AFIX  43
H26   2    0.519804    0.508350    0.387105    11.00000   -1.20000
AFIX   0
C27   1    0.402012    0.590815    0.353531    11.00000    0.02936    0.02145 =
         0.02454   -0.00328    0.00584   -0.00658
AFIX  43
H27   2    0.488087    0.618742    0.360146    11.00000   -1.20000
AFIX   0
C28   1    0.254872    0.615666    0.327971    11.00000    0.03415    0.02808 =
         0.02436    0.00463    0.00238    0.00208
AFIX  43
H28   2    0.241256    0.660523    0.317212    11.00000   -1.20000
AFIX   0
C29   1    0.129577    0.574710    0.318457    11.00000    0.02403    0.03485 =
         0.02722    0.00583   -0.00091    0.00434
AFIX  43
H29   2    0.030273    0.591840    0.301659    11.00000   -1.20000
AFIX   0
C30   1    0.148028    0.508137    0.333411    11.00000    0.01956    0.01906 =
         0.02955    0.00386    0.00422    0.00519
AFIX  43
H30   2    0.061972    0.480194    0.326701    11.00000   -1.20000
AFIX   0
C31   1    0.516701    0.381573    0.394158    11.00000    0.02003    0.01892 =
         0.01873    0.00143    0.00036    0.00098
C32   1    0.588455    0.364499    0.340970    11.00000    0.02307    0.02002 =
         0.02125    0.00146    0.00504   -0.00172
AFIX  43
H32   2    0.530181    0.358832    0.294960    11.00000   -1.20000
AFIX   0
C33   1    0.746593    0.355615    0.355012    11.00000    0.02541    0.02604 =
         0.04388    0.00155    0.01518   -0.00073
AFIX  43
H33   2    0.795179    0.343642    0.318495    11.00000   -1.20000
AFIX   0
C34   1    0.833103    0.364217    0.422168    11.00000    0.01386    0.02579 =
         0.04985    0.00128    0.00281   -0.00057
AFIX  43
H34   2    0.940532    0.358544    0.431433    11.00000   -1.20000
AFIX   0
C35   1    0.760773    0.381316    0.476112    11.00000    0.02161    0.03251 =
         0.02819   -0.00494   -0.00101   -0.00143
AFIX  43
H35   2    0.818826    0.386994    0.522162    11.00000   -1.20000
AFIX   0
C36   1    0.605003    0.389811    0.461838    11.00000    0.01907    0.02978 =
         0.02428   -0.00278   -0.00506   -0.00355
AFIX  43
H36   2    0.556368    0.401459    0.498440    11.00000   -1.20000
AFIX   0
O1    5    0.325832    0.274536    0.447944    11.00000    0.01958    0.01962 =
         0.01868   -0.00243    0.00434    0.00072

rem disordered mixture of CHCl3/Acetone

rem constraints
EADP CL5 O1S
EADP C4S CL4

rem restraints
FLAT 0.005 C2S > O1S
SADI 0.01 C3S C2S C3S C4S
SADI 0.01 C1S CL3 C1S CL4 C1S CL5
SIMU 0.01 C1S > O1S
SUMP 1 0 1 2 1 3

PART 1
C1S   1    0.316904    0.021658    0.614438    21.00000    0.05900    0.03049 =
         0.03748   -0.00295    0.00941   -0.01702
AFIX  13
H1S   2    0.418920    0.013059    0.603663    21.00000   -1.20000
AFIX   0
CL3   4    0.291621   -0.031411    0.682631    21.00000    0.04901    0.04644 =
         0.03337    0.01438    0.01043   -0.00250
CL4   4    0.309811    0.104245    0.640729    21.00000    0.05344    0.01553 =
         0.04610   -0.00234    0.01686   -0.00054
CL5   4    0.173013    0.005537    0.538598    21.00000    0.09200    0.04056 =
         0.03179    0.00041   -0.01459   -0.03865

PART 2
C2S   1    0.275226   -0.030878    0.651247    31.00000    0.04473    0.04297 =
         0.05554    0.01078    0.01339   -0.00611
AFIX 137
H2S1  2    0.182944   -0.057626    0.640264    31.00000   -1.50000
H2S2  2    0.291101   -0.015625    0.699467    31.00000   -1.50000
H2S3  2    0.363191   -0.056777    0.645509    31.00000   -1.50000
AFIX   0
C3S   1    0.257602    0.026132    0.603227    31.00000    0.06050    0.03119 =
         0.03320   -0.00612    0.01033   -0.01677
C4S   1    0.322071    0.086690    0.639469    31.00000    0.05344    0.01553 =
         0.04610   -0.00234    0.01686   -0.00054
AFIX 137
H4S1  2    0.402716    0.075480    0.679826    31.00000   -1.50000
H4S2  2    0.241266    0.110640    0.655057    31.00000   -1.50000
H4S3  2    0.364616    0.113764    0.607352    31.00000   -1.50000
AFIX   0
O1S   5    0.198449    0.022280    0.543228    31.00000    0.09200    0.04056 =
         0.03179    0.00041   -0.01459   -0.03865
HKLF 5

REM  xs0846a
REM R1 =  0.0323 for    7196 Fo > 4sig(Fo)  and  0.0386 for all    8199 data
REM    453 parameters refined using    102 restraints

END

WGHT      0.0423      0.0000

REM Instructions for potential hydrogen bonds
EQIV $1 x, -y+1/2, z+1/2
HTAB C12 Cl1_$1
HTAB C18 Cl5
HTAB C24 Cl2
HTAB C32 Cl1

REM Highest difference peak  1.182,  deepest hole -1.391,  1-sigma level  0.189
Q1    1  -0.3071  0.2240  0.2862  11.00000  0.05    1.18
Q2    1   0.0416  0.2922  0.2002  11.00000  0.05    1.14
Q3    1   0.1375 -0.0920  0.7158  11.00000  0.05    1.11
Q4    1   0.2594  0.3405  0.2374  11.00000  0.05    1.08
Q5    1   0.4252  0.2790  0.1945  11.00000  0.05    1.05
Q6    1   0.0822  0.3402  0.3410  11.00000  0.05    1.05
Q7    1   0.0550  0.3068  0.2383  11.00000  0.05    0.98
Q8    1   0.4324  0.2640  0.3170  11.00000  0.05    0.88
Q9    1   0.4827  0.2050  0.3047  11.00000  0.05    0.82
Q10   1   0.2581  0.2117  0.3454  11.00000  0.05    0.80
;
_shelx_res_checksum     209

_shelx_hkl_file
;
   0   0   1 1082.59 750.812  -2
   0   0  -1 1082.59 750.812   1
   0   0   2 678327. 740.866  -2
   0   0  -2 678327. 740.866   1
   0   0   4 175239. 3580.45  -2
   0   0  -4 175239. 3580.45   1
   0   0   5 555.880 1907.11  -2
   0   0  -5 555.880 1907.11   1
   0   0   6 22500.9 1565.48  -2
   0   0  -6 22500.9 1565.48   1
   0   0   7 271.677 652.687  -2
   0   0  -7 271.677 652.687   1
   0   0  -8 83455.1 3466.84  -2
   0   0   8 83455.1 3466.84   1
   0   0   9-100.538 1065.49  -2
   0   0  -9-100.538 1065.49   1
   0   0  10 96335.9 16192.7  -2
   0   0 -10 96335.9 16192.7   1
   0   0 -11-2120.67 3082.03  -2
   0   0  11-2120.67 3082.03   1
   0   0  12 802665. 205144.  -2
   0   0 -12 802665. 205144.   1
   0   0 -13 453.555 1519.10  -2
   0   0  13 453.555 1519.10   1
   0   0 -14 341554. 21096.7  -2
   0   0  14 341554. 21096.7   1
   0   0  15 1015.45 1096.37  -2
   0   0 -15 1015.45 1096.37   1
   0   0  16 185766. 27384.7  -2
   0   0 -16 185766. 27384.7   1
   0   0  17 159.412 1064.30  -2
   0   0 -17 159.412 1064.30   1
   0   0  18 53914.6 2338.93  -2
   0   0 -18 53914.6 2338.93   1
   0   0  19 1318.75 1067.25  -2
   0   0 -19 1318.75 1067.25   1
   0   0  20 9045.24 1220.25  -2
   0   0 -20 9045.24 1220.25   1
   0   0  21 410.921 846.647  -2
   0   0 -21 410.921 846.647   1
   0   0  22 1019.95 714.059  -2
   0   0 -22 1019.95 714.059   1
   0   0  23 433.559 526.941  -2
   0   0 -23 433.559 526.941   1
   0   1   0 271.891 256.770  -2
   0  -1   0 271.891 256.770   1
   0  -1   1 1165.66 308.872  -2
   0   1  -1 1165.66 308.872   1
   0  -1  -2 387462. 2793.69  -2
   0   1   2 387462. 2793.69   1
   0   1  -3 763.839 747.609  -2
   0  -1   3 763.839 747.609   1
   0   1  -4 191005. 3922.39  -2
   0  -1   4 191005. 3922.39   1
   0  -1   5 1031.26 1267.70  -2
   0   1  -5 1031.26 1267.70   1
   0  -1   6 339974. 11037.5  -2
   0   1  -6 339974. 11037.5   1
   0   1  -7 3251.31 1240.98  -2
   0  -1   7 3251.31 1240.98   1
   0  -1  -8 309827. 6767.74  -2
   0   1   8 309827. 6767.74   1
   0  -1  -9 15234.7 1548.72  -2
   0   1   9 15234.7 1548.72   1
   0  -1  10 646127. 44405.7  -2
   0   1 -10 646127. 44405.7   1
   0  -1  11 741.075 853.679  -2
   0   1 -11 741.075 853.679   1
   0   1 -12 158270. 4811.57  -2
   0  -1  12 158270. 4811.57   1
   0  -1 -13 1059.93 722.761  -2
   0   1  13 1059.93 722.761   1
   0  -1 -14 20567.5 13277.7  -2
   0   1  14 20567.5 13277.7   1
   0  -1  15 4250.08 1320.68  -2
   0   1 -15 4250.08 1320.68   1
   0  -1  16 13536.5 1676.25  -2
   0   1 -16 13536.5 1676.25   1
   0   1  17 253.148 675.273  -2
   0  -1 -17 253.148 675.273   1
   0  -1  18 71635.9 2582.23  -2
   0   1 -18 71635.9 2582.23   1
   0   1  19 6156.13 746.529  -2
   0  -1 -19 6156.13 746.529   1
   0  -1  20 138115. 3075.19  -2
   0   1 -20 138115. 3075.19   1
   0  -1  21 7599.33 1018.82  -2
   0   1 -21 7599.33 1018.82   1
   0   1  22 124916. 2326.92  -2
   0  -1 -22 124916. 2326.92   1
   0  -1  23 2655.23 571.705  -2
   0   1 -23 2655.23 571.705   1
   0   2   0 447577. 2044.57  -2
   0  -2   0 447577. 2044.57   1
   0  -2   1 61631.4 1339.77  -2
   0   2  -1 61631.4 1339.77   1
   0  -2  -2 225097. 5046.22  -2
   0   2   2 225097. 5046.22   1
   0  -2   3 30508.8 1148.19  -2
   0   2  -3 30508.8 1148.19   1
   0   2  -4 389247. 9457.49  -2
   0  -2   4 389247. 9457.49   1
   0  -2  -5 20963.7 1937.74  -2
   0   2   5 20963.7 1937.74   1
   0  -2   6 35967.1 1859.45  -2
   0   2  -6 35967.1 1859.45   1
   0  -2   7 332.978 726.903  -2
   0   2  -7 332.978 726.903   1
   0  -2   8 89473.2 4121.74  -2
   0   2  -8 89473.2 4121.74   1
   0   2   9 14001.5 1447.33  -2
   0  -2  -9 14001.5 1447.33   1
   0   2 -10 140227. 3810.90  -2
   0  -2  10 140227. 3810.90   1
   0   2  11 79619.1 3370.84  -2
   0  -2 -11 79619.1 3370.84   1
   0  -2  12 177762. 5306.90  -2
   0   2 -12 177762. 5306.90   1
   0   2 -13 30772.3 4061.11  -2
   0  -2  13 30772.3 4061.11   1
   0  -2  14 137167. 5560.28  -2
   0   2 -14 137167. 5560.28   1
   0  -2 -15 8688.73 972.962  -2
   0   2  15 8688.73 972.962   1
   0   2  16 80207.2 3258.63  -2
   0  -2 -16 80207.2 3258.63   1
   0  -2  17 1768.94 1159.60  -2
   0   2 -17 1768.94 1159.60   1
   0   2  18 27938.4 2138.03  -2
   0  -2 -18 27938.4 2138.03   1
   0   2  19 231.355 633.913  -2
   0  -2 -19 231.355 633.913   1
   0   2  20 1806.79 1121.89  -2
   0  -2 -20 1806.79 1121.89   1
   0  -2  21 5906.38 970.563  -2
   0   2 -21 5906.38 970.563   1
   0   2  22 795.548 479.466  -2
   0  -2 -22 795.548 479.466   1
   0  -2  23 10696.0 938.476  -2
   0   2 -23 10696.0 938.476   1
   0   3   0 96.3883 279.072  -2
   0  -3   0 96.3883 279.072   1
   0   3   1 1006.64 458.102  -2
   0  -3  -1 1006.64 458.102   1
   0   3  -2 807.585 508.852  -2
   0  -3   2 807.585 508.852   1
   0   3  -3 3688.53 767.749  -2
   0  -3   3 3688.53 767.749   1
   0  -3   4 11400.3 1374.50  -2
   0   3  -4 11400.3 1374.50   1
   0   3  -5 23363.2 1354.13  -2
   0  -3   5 23363.2 1354.13   1
   0   3   6 31208.6 1496.37  -2
   0  -3  -6 31208.6 1496.37   1
   0  -3   7 52800.1 1757.50  -2
   0   3  -7 52800.1 1757.50   1
   0  -3  -8 42149.7 1697.48  -2
   0   3   8 42149.7 1697.48   1
   0  -3   9 13962.4 1405.22  -2
   0   3  -9 13962.4 1405.22   1
   0   3 -10 16283.5 2240.99  -2
   0  -3  10 16283.5 2240.99   1
   0  -3 -11 1210.83 1190.71  -2
   0   3  11 1210.83 1190.71   1
   0  -3 -12 58827.3 3068.57  -2
   0   3  12 58827.3 3068.57   1
   0  -3  13 313.366 822.916  -2
   0   3 -13 313.366 822.916   1
   0  -3  14 32674.9 5219.23  -2
   0   3 -14 32674.9 5219.23   1
   0  -3  15 1131.95 1027.18  -2
   0   3 -15 1131.95 1027.18   1
   0  -3  16 2038.53 1878.20  -2
   0   3 -16 2038.53 1878.20   1
   0   3  17 10709.8 1549.22  -2
   0  -3 -17 10709.8 1549.22   1
   0  -3  18 5135.42 1178.21  -2
   0   3 -18 5135.42 1178.21   1
   0  -3  19 24443.1 1008.65  -2
   0   3 -19 24443.1 1008.65   1
   0   3  20 13156.0 1244.26  -2
   0  -3 -20 13156.0 1244.26   1
   0  -3  21 8290.55 982.637  -2
   0   3 -21 8290.55 982.637   1
   0   3  22 7405.41 802.327  -2
   0  -3 -22 7405.41 802.327   1
   0  -3  23 1168.98 580.218  -2
   0   3 -23 1168.98 580.218   1
   0   4   0 7420.13 683.914  -2
   0  -4   0 7420.13 683.914   1
   0   4  -1 332.670 280.209  -2
   0  -4   1 332.670 280.209   1
   0  -4   2 72965.7 2184.28  -2
   0   4  -2 72965.7 2184.28   1
   0  -4   3 37177.9 1836.77  -2
   0   4  -3 37177.9 1836.77   1
   0   4  -4 36121.4 1634.13  -2
   0  -4   4 36121.4 1634.13   1
   0  -4  -5 6607.30 942.431  -2
   0   4   5 6607.30 942.431   1
   0  -4  -6 652.668 768.314  -2
   0   4   6 652.668 768.314   1
   0  -4  -7 32751.2 1495.24  -2
   0   4   7 32751.2 1495.24   1
   0   4   8 14763.7 1246.94  -2
   0  -4  -8 14763.7 1246.94   1
   0   4   9 59634.2 2074.15  -2
   0  -4  -9 59634.2 2074.15   1
   0   4 -10 3313.50 1132.42  -2
   0  -4  10 3313.50 1132.42   1
   0  -4  11 171.664 1154.44  -2
   0   4 -11 171.664 1154.44   1
   0  -4  12 1555.72 1175.45  -2
   0   4 -12 1555.72 1175.45   1
   0  -4  13 24.8981 640.825  -2
   0   4 -13 24.8981 640.825   1
   0  -4 -14 3355.27 1159.06  -2
   0   4  14 3355.27 1159.06   1
   0   4 -15 2168.16 1051.65  -2
   0  -4  15 2168.16 1051.65   1
   0  -4  16 561.321 544.151  -2
   0   4 -16 561.321 544.151   1
   0   4  17 10514.4 1300.67  -2
   0  -4 -17 10514.4 1300.67   1
   0  -4  18 743.424 680.387  -2
   0   4 -18 743.424 680.387   1
   0   4  19 3897.53 1040.12  -2
   0  -4 -19 3897.53 1040.12   1
   0   4  20 819.267 833.679  -2
   0  -4 -20 819.267 833.679   1
   0  -4  21 11071.7 978.718  -2
   0   4 -21 11071.7 978.718   1
   0  -4  22 1660.37 744.937  -2
   0   4 -22 1660.37 744.937   1
   0  -4  23 2232.86 619.208  -2
   0   4 -23 2232.86 619.208   1
   0   5   0 120.994 335.359  -2
   0  -5   0 120.994 335.359   1
   0  -5  -1 243514. 1871.44  -2
   0   5   1 243514. 1871.44   1
   0  -5  -2 153104. 3269.42  -2
   0   5   2 153104. 3269.42   1
   0  -5  -3 107375. 7740.95  -2
   0   5   3 107375. 7740.95   1
   0  -5   4 62383.6 3024.27  -2
   0   5  -4 62383.6 3024.27   1
   0  -5   5 99885.4 2144.14  -2
   0   5  -5 99885.4 2144.14   1
   0   5   6 92971.3 3732.39  -2
   0  -5  -6 92971.3 3732.39   1
   0  -5   7 91171.7 2872.70  -2
   0   5  -7 91171.7 2872.70   1
   0   5  -8 23959.2 1310.00  -2
   0  -5   8 23959.2 1310.00   1
   0  -5   9 51878.0 6099.72  -2
   0   5  -9 51878.0 6099.72   1
   0  -5  10 39587.6 2069.88  -2
   0   5 -10 39587.6 2069.88   1
   0  -5  11 29420.9 2800.27  -2
   0   5 -11 29420.9 2800.27   1
   0  -5 -12 275.078 1091.50  -2
   0   5  12 275.078 1091.50   1
   0  -5  13 1005.16 1359.52  -2
   0   5 -13 1005.16 1359.52   1
   0   5 -14 27108.5 2295.98  -2
   0  -5  14 27108.5 2295.98   1
   0   5 -15 1197.80 888.465  -2
   0  -5  15 1197.80 888.465   1
   0  -5  16 29461.1 1882.37  -2
   0   5 -16 29461.1 1882.37   1
   0  -5  17 84.9340 887.200  -2
   0   5 -17 84.9340 887.200   1
   0  -5  18 30763.2 1650.06  -2
   0   5 -18 30763.2 1650.06   1
   0  -5  19 1545.84 1016.42  -2
   0   5 -19 1545.84 1016.42   1
   0  -5  20 8250.48 1119.74  -2
   0   5 -20 8250.48 1119.74   1
   0  -5  21 8555.09 1031.27  -2
   0   5 -21 8555.09 1031.27   1
   0  -5  22 2971.38 762.875  -2
   0   5 -22 2971.38 762.875   1
   0  -5  23 11641.8 765.989  -2
   0   5 -23 11641.8 765.989   1
   0   6   0 160286. 2186.76  -2
   0  -6   0 160286. 2186.76   1
   0   6   1 338741. 6075.32  -2
   0  -6  -1 338741. 6075.32   1
   0  -6   2 43601.0 1600.23  -2
   0   6  -2 43601.0 1600.23   1
   0  -6   3 68971.5 1995.48  -2
   0   6  -3 68971.5 1995.48   1
   0   6  -4 3384.09 1065.22  -2
   0  -6   4 3384.09 1065.22   1
   0  -6   5 38488.5 1710.69  -2
   0   6  -5 38488.5 1710.69   1
   0  -6  -6 8690.85 1220.42  -2
   0   6   6 8690.85 1220.42   1
   0  -6  -7 11958.3 1209.24  -2
   0   6   7 11958.3 1209.24   1
   0   6  -8 1585.53 842.303  -2
   0  -6   8 1585.53 842.303   1
   0   6  -9 264.444 351.646  -2
   0  -6   9 264.444 351.646   1
   0  -6  10 6924.38 2016.69  -2
   0   6 -10 6924.38 2016.69   1
   0  -6  11 81285.4 4221.55  -2
   0   6 -11 81285.4 4221.55   1
   0  -6  12 26969.6 2789.09  -2
   0   6 -12 26969.6 2789.09   1
   0  -6  13 110662. 5407.17  -2
   0   6 -13 110662. 5407.17   1
   0  -6  14 39454.2 1829.72  -2
   0   6 -14 39454.2 1829.72   1
   0  -6  15 140401. 3483.16  -2
   0   6 -15 140401. 3483.16   1
   0  -6  16 20214.7 1605.57  -2
   0   6 -16 20214.7 1605.57   1
   0  -6  17 98912.4 2609.72  -2
   0   6 -17 98912.4 2609.72   1
   0  -6  18 3386.18 951.208  -2
   0   6 -18 3386.18 951.208   1
   0  -6  19 42584.3 2674.45  -2
   0   6 -19 42584.3 2674.45   1
   0  -6  20 132.514 882.999  -2
   0   6 -20 132.514 882.999   1
   0  -6  21 6743.29 962.252  -2
   0   6 -21 6743.29 962.252   1
   0  -6  22 85.6134 637.613  -2
   0   6 -22 85.6134 637.613   1
   0  -6  23 5857.32 620.278  -2
   0   6 -23 5857.32 620.278   1
   0  -7   0 36.0466 672.417  -2
   0   7   0 36.0466 672.417   1
   0  -7  -1 74828.0 2904.19  -2
   0   7   1 74828.0 2904.19   1
   0   7   2 40194.7 1499.48  -2
   0  -7  -2 40194.7 1499.48   1
   0   7  -3 529375. 6288.45  -2
   0  -7   3 529375. 6288.45   1
   0   7  -4 166316. 4800.71  -2
   0  -7   4 166316. 4800.71   1
   0  -7   5 588392. 6097.59  -2
   0   7  -5 588392. 6097.59   1
   0   7  -6 54626.9 1265.78  -2
   0  -7   6 54626.9 1265.78   1
   0   7  -7 461980. 16820.2  -2
   0  -7   7 461980. 16820.2   1
   0   7  -8 34987.2 1777.50  -2
   0  -7   8 34987.2 1777.50   1
   0  -7   9 323308. 7574.71  -2
   0   7  -9 323308. 7574.71   1
   0  -7  10 16587.2 2329.99  -2
   0   7 -10 16587.2 2329.99   1
   0  -7  11 62177.6 8391.01  -2
   0   7 -11 62177.6 8391.01   1
   0  -7  12 8156.43 4061.90  -2
   0   7 -12 8156.43 4061.90   1
   0   7 -13 30338.7 2639.32  -2
   0  -7  13 30338.7 2639.32   1
   0   7 -14 501.854 1166.03  -2
   0  -7  14 501.854 1166.03   1
   0  -7  15 685.332 795.234  -2
   0   7 -15 685.332 795.234   1
   0  -7  16 29289.2 2118.71  -2
   0   7 -16 29289.2 2118.71   1
   0  -7  17 85100.1 2438.86  -2
   0   7 -17 85100.1 2438.86   1
   0  -7  18 23410.0 1492.66  -2
   0   7 -18 23410.0 1492.66   1
   0  -7  19 73152.7 2068.08  -2
   0   7 -19 73152.7 2068.08   1
   0  -7  20 11903.8 999.163  -2
   0   7 -20 11903.8 999.163   1
   0  -7  21 103189. 2217.84  -2
   0   7 -21 103189. 2217.84   1
   0  -7  22 4707.98 709.717  -2
   0   7 -22 4707.98 709.717   1
   0  -8   0 3636.33 763.107  -2
   0   8   0 3636.33 763.107   1
   0   8   1 512950. 4081.76  -2
   0  -8  -1 512950. 4081.76   1
   0  -8   2 16646.4 1406.57  -2
   0   8  -2 16646.4 1406.57   1
   0  -8   3 544327. 6386.54  -2
   0   8  -3 544327. 6386.54   1
   0  -8   4 9483.51 1318.39  -2
   0   8  -4 9483.51 1318.39   1
   0   8  -5 175879. 4502.83  -2
   0  -8   5 175879. 4502.83   1
   0  -8   6 861.342 1067.24  -2
   0   8  -6 861.342 1067.24   1
   0  -8  -7 189.444 526.818  -2
   0   8   7 189.444 526.818   1
   0   8  -8 4259.21 1121.83  -2
   0  -8   8 4259.21 1121.83   1
   0   8  -9 80003.8 7108.99  -2
   0  -8   9 80003.8 7108.99   1
   0   8 -10 6884.21 1826.80  -2
   0  -8  10 6884.21 1826.80   1
   0  -8  11 107889. 11880.2  -2
   0   8 -11 107889. 11880.2   1
   0  -8  12 453.438 1091.25  -2
   0   8 -12 453.438 1091.25   1
   0  -8  13 157693. 4137.30  -2
   0   8 -13 157693. 4137.30   1
   0  -8 -14 10336.0 1391.28  -2
   0   8  14 10336.0 1391.28   1
   0  -8  15 342824. 5119.51  -2
   0   8 -15 342824. 5119.51   1
   0  -8  16 391.715 756.800  -2
   0   8 -16 391.715 756.800   1
   0  -8  17 206563. 4062.57  -2
   0   8 -17 206563. 4062.57   1
   0  -8  18 7663.54 1164.24  -2
   0   8 -18 7663.54 1164.24   1
   0  -8  19 53777.5 1754.38  -2
   0   8 -19 53777.5 1754.38   1
   0  -8  20 585.460 661.039  -2
   0   8 -20 585.460 661.039   1
   0  -8  21 1538.89 712.769  -2
   0   8 -21 1538.89 712.769   1
   0  -8  22 629.826 556.272  -2
   0   8 -22 629.826 556.272   1
   0  -9   0 325.965 638.521  -2
   0   9   0 325.965 638.521   1
   0   9  -1 263.635 576.325  -2
   0  -9   1 263.635 576.325   1
   0  -9   2 1725.89 1004.24  -2
   0   9  -2 1725.89 1004.24   1
   0  -9  -3 97902.5 2662.30  -2
   0   9   3 97902.5 2662.30   1
   0  -9   4 3560.65 1160.55  -2
   0   9  -4 3560.65 1160.55   1
   0  -9   5 650458. 10195.5  -2
   0   9  -5 650458. 10195.5   1
   0   9  -6 949.667 1037.84  -2
   0  -9   6 949.667 1037.84   1
   0   9  -7 484182. 8132.20  -2
   0  -9   7 484182. 8132.20   1
   0  -9  -8 3660.60 1546.77  -2
   0   9   8 3660.60 1546.77   1
   0  -9   9 316027. 6986.73  -2
   0   9  -9 316027. 6986.73   1
   0   9 -10 5561.40 1810.49  -2
   0  -9  10 5561.40 1810.49   1
   0   9 -11 48737.9 3265.98  -2
   0  -9  11 48737.9 3265.98   1
   0   9 -12 1651.59 2339.74  -2
   0  -9  12 1651.59 2339.74   1
   0  -9  13 23882.3 1810.52  -2
   0   9 -13 23882.3 1810.52   1
   0  -9  14 5139.73 1271.84  -2
   0   9 -14 5139.73 1271.84   1
   0  -9  15 1646.24 1114.69  -2
   0   9 -15 1646.24 1114.69   1
   0  -9  16 2110.46 1070.25  -2
   0   9 -16 2110.46 1070.25   1
   0  -9  17 69268.7 2315.52  -2
   0   9 -17 69268.7 2315.52   1
   0  -9  18 386.966 623.007  -2
   0   9 -18 386.966 623.007   1
   0  -9  19 73380.2 1913.84  -2
   0   9 -19 73380.2 1913.84   1
   0  -9  20 1151.89 647.393  -2
   0   9 -20 1151.89 647.393   1
   0  -9  21 59815.7 14289.1  -2
   0   9 -21 59815.7 14289.1   1
   0  -9  22 2557.54 552.630  -2
   0   9 -22 2557.54 552.630   1
   0 -10   0 2126.58 895.371  -2
   0  10   0 2126.58 895.371   1
   0 -10   1 90552.9 3216.27  -2
   0  10  -1 90552.9 3216.27   1
   0 -10   2 22007.5 1619.44  -2
   0  10  -2 22007.5 1619.44   1
   0 -10   3 254364. 5056.35  -2
   0  10  -3 254364. 5056.35   1
   0  10  -4 3432.01 1142.46  -2
   0 -10   4 3432.01 1142.46   1
   0 -10  -5 17435.0 2085.22  -2
   0  10   5 17435.0 2085.22   1
   0 -10  -6 2348.58 1109.78  -2
   0  10   6 2348.58 1109.78   1
   0 -10  -7 14192.4 1914.36  -2
   0  10   7 14192.4 1914.36   1
   0 -10  -8 3452.42 1409.23  -2
   0  10   8 3452.42 1409.23   1
   0 -10   9 42593.2 2982.18  -2
   0  10  -9 42593.2 2982.18   1
   0  10 -10 18132.7 3157.66  -2
   0 -10  10 18132.7 3157.66   1
   0 -10  11 55227.8 3415.08  -2
   0  10 -11 55227.8 3415.08   1
   0  10 -12 7796.61 1490.89  -2
   0 -10  12 7796.61 1490.89   1
   0 -10  13 63260.0 2494.67  -2
   0  10 -13 63260.0 2494.67   1
   0 -10  14 35961.7 2224.43  -2
   0  10 -14 35961.7 2224.43   1
   0 -10  15 133882. 3195.83  -2
   0  10 -15 133882. 3195.83   1
   0 -10  16 2167.49 779.814  -2
   0  10 -16 2167.49 779.814   1
   0 -10  17 27751.2 1900.15  -2
   0  10 -17 27751.2 1900.15   1
   0 -10  18 1020.10 695.639  -2
   0  10 -18 1020.10 695.639   1
   0 -10  19 37449.7 1699.63  -2
   0  10 -19 37449.7 1699.63   1
   0 -10  20 7390.96 758.204  -2
   0  10 -20 7390.96 758.204   1
   0 -10  21 778.909 516.776  -2
   0  10 -21 778.909 516.776   1
   0 -11   0 824.142 1709.89  -2
   0  11   0 824.142 1709.89   1
   0 -11   1 384.659 1550.54  -2
   0  11  -1 384.659 1550.54   1
   0 -11  -2 2570.62 1356.30  -2
   0  11   2 2570.62 1356.30   1
   0 -11   3 34806.2 2767.82  -2
   0  11  -3 34806.2 2767.82   1
   0 -11   4 11417.1 1423.47  -2
   0  11  -4 11417.1 1423.47   1
   0 -11   5 67043.2 2538.00  -2
   0  11  -5 67043.2 2538.00   1
   0 -11   6 2726.49 1283.81  -2
   0  11  -6 2726.49 1283.81   1
   0 -11   7 18312.1 2003.53  -2
   0  11  -7 18312.1 2003.53   1
   0  11  -8-497.382 1339.42  -2
   0 -11   8-497.382 1339.42   1
   0 -11   9 53828.2 5260.90  -2
   0  11  -9 53828.2 5260.90   1
   0  11 -10 241.209 768.608  -2
   0 -11  10 241.209 768.608   1
   0  11 -11 12525.1 1531.65  -2
   0 -11  11 12525.1 1531.65   1
   0 -11  12 1143.94 1183.26  -2
   0  11 -12 1143.94 1183.26   1
   0 -11  13 1703.24 1111.67  -2
   0  11 -13 1703.24 1111.67   1
   0 -11  14 4501.85 1141.98  -2
   0  11 -14 4501.85 1141.98   1
   0 -11  15 2449.67 1073.35  -2
   0  11 -15 2449.67 1073.35   1
   0 -11  16 4285.60 1066.91  -2
   0  11 -16 4285.60 1066.91   1
   0 -11  17 1656.94 899.295  -2
   0  11 -17 1656.94 899.295   1
   0 -11  18 3332.71 874.725  -2
   0  11 -18 3332.71 874.725   1
   0 -11  19 4964.29 804.630  -2
   0  11 -19 4964.29 804.630   1
   0 -11  20 62.6953 526.913  -2
   0  11 -20 62.6953 526.913   1
   0 -11  21 7473.01 1898.82  -2
   0  11 -21 7473.01 1898.82   1
   0 -12   0 2723.01 1656.97  -2
   0  12   0 2723.01 1656.97   1
   0 -12   1 1027.47 1751.77  -2
   0  12  -1 1027.47 1751.77   1
   0 -12  -2 755.027 1282.71  -2
   0  12   2 755.027 1282.71   1
   0 -12   3 6396.93 1651.28  -2
   0  12  -3 6396.93 1651.28   1
   0 -12   4 2294.31 1487.78  -2
   0  12  -4 2294.31 1487.78   1
   0 -12   5 144.281 778.843  -2
   0  12  -5 144.281 778.843   1
   0 -12  -6 793.371 1440.13  -2
   0  12   6 793.371 1440.13   1
   0 -12   7 12885.0 1829.12  -2
   0  12  -7 12885.0 1829.12   1
   0  12  -8 56.8363 742.855  -2
   0 -12   8 56.8363 742.855   1
   0  12  -9 15683.0 1999.15  -2
   0 -12   9 15683.0 1999.15   1
   0  12 -10 501.969 740.607  -2
   0 -12  10 501.969 740.607   1
   0  12  11 232.972 661.436  -2
   0 -12 -11 232.972 661.436   1
   0 -12  12 4960.80 1159.01  -2
   0  12 -12 4960.80 1159.01   1
   0 -12  13 632.838 685.128  -2
   0  12 -13 632.838 685.128   1
   0 -12  14 3891.18 1109.50  -2
   0  12 -14 3891.18 1109.50   1
   0 -12  15 239.155 710.239  -2
   0  12 -15 239.155 710.239   1
   0 -12  16 5569.04 1019.82  -2
   0  12 -16 5569.04 1019.82   1
   0 -12  17 1988.74 875.430  -2
   0  12 -17 1988.74 875.430   1
   0 -12  18 2583.56 856.131  -2
   0  12 -18 2583.56 856.131   1
   0 -12  19 1137.10 653.750  -2
   0  12 -19 1137.10 653.750   1
   0 -12  20 8284.21 694.938  -2
   0  12 -20 8284.21 694.938   1
   0 -13   0 1255.31 1879.58  -2
   0  13   0 1255.31 1879.58   1
   0 -13  -1 3060.22 2083.88  -2
   0  13   1 3060.22 2083.88   1
   0 -13   2 8142.13 3166.82  -2
   0  13  -2 8142.13 3166.82   1
   0 -13   3 39746.4 3791.32  -2
   0  13  -3 39746.4 3791.32   1
   0 -13  -4 19772.2 2546.83  -2
   0  13   4 19772.2 2546.83   1
   0 -13   5 56323.2 3115.48  -2
   0  13  -5 56323.2 3115.48   1
   0 -13   6 46204.9 3799.32  -2
   0  13  -6 46204.9 3799.32   1
   0 -13   7 57314.7 3339.08  -2
   0  13  -7 57314.7 3339.08   1
   0 -13   8 31731.7 2590.21  -2
   0  13  -8 31731.7 2590.21   1
   0 -13   9 10081.2 1367.18  -2
   0  13  -9 10081.2 1367.18   1
   0  13  10 17539.4 1554.80  -2
   0 -13 -10 17539.4 1554.80   1
   0  13  11 554.127 719.871  -2
   0 -13 -11 554.127 719.871   1
   0 -13  12 31271.9 1955.66  -2
   0  13 -12 31271.9 1955.66   1
   0 -13  13 1893.39 1045.66  -2
   0  13 -13 1893.39 1045.66   1
   0 -13  14 17106.3 1489.01  -2
   0  13 -14 17106.3 1489.01   1
   0 -13  15 2727.27 1045.21  -2
   0  13 -15 2727.27 1045.21   1
   0 -13  16 312.238 637.259  -2
   0  13 -16 312.238 637.259   1
   0 -13  17 10321.6 1079.93  -2
   0  13 -17 10321.6 1079.93   1
   0 -13  18 10369.9 960.945  -2
   0  13 -18 10369.9 960.945   1
   0 -13  19 16233.0 847.066  -2
   0  13 -19 16233.0 847.066   1
   0 -13  20 13051.7 2165.71  -2
   0  13 -20 13051.7 2165.71   1
   0 -14   0 85228.4 4432.13  -2
   0  14   0 85228.4 4432.13   1
   0 -14  -1 83215.0 4461.02  -2
   0  14   1 83215.0 4461.02   1
   0 -14   2 140332. 19898.2  -2
   0  14  -2 140332. 19898.2   1
   0 -14   3 62119.2 3997.18  -2
   0  14  -3 62119.2 3997.18   1
   0 -14   4 72693.0 5232.18  -2
   0  14  -4 72693.0 5232.18   1
   0 -14  -5 27069.8 2959.26  -2
   0  14   5 27069.8 2959.26   1
   0 -14   6 9239.50 2193.64  -2
   0  14  -6 9239.50 2193.64   1
   0  14   7 999.287 1424.64  -2
   0 -14  -7 999.287 1424.64   1
   0 -14   8 13628.8 1563.94  -2
   0  14  -8 13628.8 1563.94   1
   0 -14   9 20446.7 1583.66  -2
   0  14  -9 20446.7 1583.66   1
   0 -14  10 19731.2 1561.37  -2
   0  14 -10 19731.2 1561.37   1
   0  14  11 39848.0 2019.11  -2
   0 -14 -11 39848.0 2019.11   1
   0  14  12 12735.7 1340.59  -2
   0 -14 -12 12735.7 1340.59   1
   0 -14  13 42614.1 2049.48  -2
   0  14 -13 42614.1 2049.48   1
   0 -14  14 68994.4 2379.85  -2
   0  14 -14 68994.4 2379.85   1
   0 -14  15 32821.3 1932.47  -2
   0  14 -15 32821.3 1932.47   1
   0 -14  16 55941.5 2047.82  -2
   0  14 -16 55941.5 2047.82   1
   0 -14  17 32572.8 1432.29  -2
   0  14 -17 32572.8 1432.29   1
   0 -14  18 26014.9 1221.93  -2
   0  14 -18 26014.9 1221.93   1
   0 -14  19 2200.67 590.550  -2
   0  14 -19 2200.67 590.550   1
   0 -15   0 1411.15 1819.33  -2
   0  15   0 1411.15 1819.33   1
   0 -15  -1-1057.76 1977.97  -2
   0  15   1-1057.76 1977.97   1
   0 -15   2 41597.2 6369.91  -2
   0  15  -2 41597.2 6369.91   1
   0 -15  -3 38136.8 5818.00  -2
   0  15   3 38136.8 5818.00   1
   0 -15  -4 213292. 28194.3  -2
   0  15   4 213292. 28194.3   1
   0 -15  -5 60421.9 3114.11  -2
   0  15   5 60421.9 3114.11   1
   0 -15   6 198414. 3682.74  -2
   0  15  -6 198414. 3682.74   1
   0 -15   7 79204.9 3375.11  -2
   0  15  -7 79204.9 3375.11   1
   0 -15   8 206320. 3828.83  -2
   0  15  -8 206320. 3828.83   1
   0  15   9 49204.9 2190.46  -2
   0 -15  -9 49204.9 2190.46   1
   0 -15  10 100009. 2951.63  -2
   0  15 -10 100009. 2951.63   1
   0 -15  11 8042.24 1300.24  -2
   0  15 -11 8042.24 1300.24   1
   0  15  12 66557.0 2404.17  -2
   0 -15 -12 66557.0 2404.17   1
   0 -15  13 729.346 746.113  -2
   0  15 -13 729.346 746.113   1
   0 -15  14 125.993 666.652  -2
   0  15 -14 125.993 666.652   1
   0 -15  15 1701.59 920.995  -2
   0  15 -15 1701.59 920.995   1
   0 -15  16 30007.6 1449.80  -2
   0  15 -16 30007.6 1449.80   1
   0 -15  17 5126.93 832.420  -2
   0  15 -17 5126.93 832.420   1
   0 -15  18 38673.8 2523.82  -2
   0  15 -18 38673.8 2523.82   1
   0 -15  19 10272.1 709.938  -2
   0  15 -19 10272.1 709.938   1
   0 -16   0 320688. 9281.02  -2
   0  16   0 320688. 9281.02   1
   0 -16   1 33774.8 2560.91  -2
   0  16  -1 33774.8 2560.91   1
   0 -16   2 252375. 9189.87  -2
   0  16  -2 252375. 9189.87   1
   0 -16   3 6026.07 1354.44  -2
   0  16  -3 6026.07 1354.44   1
   0 -16   4 37912.1 2832.05  -2
   0  16  -4 37912.1 2832.05   1
   0 -16  -5 7250.58 1376.29  -2
   0  16   5 7250.58 1376.29   1
   0 -16   6 15756.7 1599.63  -2
   0  16  -6 15756.7 1599.63   1
   0 -16   7 851.087 1080.17  -2
   0  16  -7 851.087 1080.17   1
   0  16   8 1045.87 1057.86  -2
   0 -16  -8 1045.87 1057.86   1
   0  16   9 1604.80 1104.45  -2
   0 -16  -9 1604.80 1104.45   1
   0 -16  10 29494.2 2071.14  -2
   0  16 -10 29494.2 2071.14   1
   0 -16  11 12385.2 1354.89  -2
   0  16 -11 12385.2 1354.89   1
   0 -16  12 147058. 3320.01  -2
   0  16 -12 147058. 3320.01   1
   0  16  13 20376.4 1388.53  -2
   0 -16 -13 20376.4 1388.53   1
   0 -16  14 171383. 3264.70  -2
   0  16 -14 171383. 3264.70   1
   0 -16  15 12915.1 1161.40  -2
   0  16 -15 12915.1 1161.40   1
   0 -16  16 62247.0 1834.98  -2
   0  16 -16 62247.0 1834.98   1
   0 -16  17 10892.1 902.036  -2
   0  16 -17 10892.1 902.036   1
   0 -16  18 22579.2 1007.15  -2
   0  16 -18 22579.2 1007.15   1
   0 -17   0 560.845 1298.10  -2
   0  17   0 560.845 1298.10   1
   0  17  -1 2543.71 1731.55  -2
   0 -17   1 2543.71 1731.55   1
   0 -17  -2 88512.4 3745.91  -2
   0  17   2 88512.4 3745.91   1
   0 -17  -3 8241.69 1430.81  -2
   0  17   3 8241.69 1430.81   1
   0 -17  -4 103639. 8701.04  -2
   0  17   4 103639. 8701.04   1
   0 -17   5 6351.62 1098.53  -2
   0  17  -5 6351.62 1098.53   1
   0  17   6 209399. 3949.11  -2
   0 -17  -6 209399. 3949.11   1
   0 -17   7 343.964 1099.15  -2
   0  17  -7 343.964 1099.15   1
   0 -17   8 181572. 4038.50  -2
   0  17  -8 181572. 4038.50   1
   0 -17   9 2306.15 1103.49  -2
   0  17  -9 2306.15 1103.49   1
   0  17  10 158866. 3457.16  -2
   0 -17 -10 158866. 3457.16   1
   0  17  11 907.462 983.765  -2
   0 -17 -11 907.462 983.765   1
   0 -17  12 25505.5 1780.76  -2
   0  17 -12 25505.5 1780.76   1
   0  17  13 545.333 674.580  -2
   0 -17 -13 545.333 674.580   1
   0 -17  14 9835.35 1044.48  -2
   0  17 -14 9835.35 1044.48   1
   0 -17  15 1110.60 747.517  -2
   0  17 -15 1110.60 747.517   1
   0 -17  16 11870.9 953.797  -2
   0  17 -16 11870.9 953.797   1
   0 -17  17 1232.56 443.578  -2
   0  17 -17 1232.56 443.578   1
   0  18   0 98340.7 2621.26  -2
   0 -18   0 98340.7 2621.26   1
   0  18  -1 971.020 768.023  -2
   0 -18   1 971.020 768.023   1
   0  18   2 32892.7 4078.31  -2
   0 -18  -2 32892.7 4078.31   1
   0  18   3 1457.32 891.644  -2
   0 -18  -3 1457.32 891.644   1
   0 -18   4 50307.1 5030.09  -2
   0  18  -4 50307.1 5030.09   1
   0 -18   5 5343.27 994.492  -2
   0  18  -5 5343.27 994.492   1
   0  18   6 8180.28 1349.89  -2
   0 -18  -6 8180.28 1349.89   1
   0 -18   7 1379.72 1036.11  -2
   0  18  -7 1379.72 1036.11   1
   0 -18   8 1094.99 1019.56  -2
   0  18  -8 1094.99 1019.56   1
   0 -18   9 4613.88 1143.52  -2
   0  18  -9 4613.88 1143.52   1
   0 -18  10 12536.9 1275.70  -2
   0  18 -10 12536.9 1275.70   1
   0 -18  11 1371.13 937.315  -2
   0  18 -11 1371.13 937.315   1
   0 -18  12 73428.2 2400.88  -2
   0  18 -12 73428.2 2400.88   1
   0 -18  13 139.692 601.759  -2
   0  18 -13 139.692 601.759   1
   0  18  14 36239.7 1361.31  -2
   0 -18 -14 36239.7 1361.31   1
   0 -18  15 4759.17 768.024  -2
   0  18 -15 4759.17 768.024   1
   0 -18  16 24068.9 1094.05  -2
   0  18 -16 24068.9 1094.05   1
   0  19   0-80.6728 904.782  -2
   0 -19   0-80.6728 904.782   1
   0  19   1 418.120 564.181  -2
   0 -19  -1 418.120 564.181   1
   0  19   2 7554.67 1115.75  -2
   0 -19  -2 7554.67 1115.75   1
   0 -19   3 500.512 523.069  -2
   0  19  -3 500.512 523.069   1
   0 -19   4 6318.82 1012.36  -2
   0  19  -4 6318.82 1012.36   1
   0  19   5 80.6643 817.330  -2
   0 -19  -5 80.6643 817.330   1
   0  19   6 26618.3 1829.10  -2
   0 -19  -6 26618.3 1829.10   1
   0 -19   7 1010.49 987.759  -2
   0  19  -7 1010.49 987.759   1
   0  19   8 11459.4 1196.82  -2
   0 -19  -8 11459.4 1196.82   1
   0 -19   9 1487.63 917.454  -2
   0  19  -9 1487.63 917.454   1
   0 -19  10 14240.0 1250.81  -2
   0  19 -10 14240.0 1250.81   1
   0  19  11 825.201 809.826  -2
   0 -19 -11 825.201 809.826   1
   0  19  12 379.200 508.695  -2
   0 -19 -12 379.200 508.695   1
   0 -19  13 5674.84 805.514  -2
   0  19 -13 5674.84 805.514   1
   0  19  14 659.934 618.816  -2
   0 -19 -14 659.934 618.816   1
   0 -19  15 239.191 384.934  -2
   0  19 -15 239.191 384.934   1
   0 -20   0 8310.42 1059.42  -2
   0  20   0 8310.42 1059.42   1
   0  20  -1 478.817 835.218  -2
   0 -20   1 478.817 835.218   1
   0 -20   2 23049.6 2024.29  -2
   0  20  -2 23049.6 2024.29   1
   0 -20   3 1111.03 840.216  -2
   0  20  -3 1111.03 840.216   1
   0  20   4 81.5172 778.223  -2
   0 -20  -4 81.5172 778.223   1
   0  20   5 97.8569 572.049  -2
   0 -20  -5 97.8569 572.049   1
   0  20   6 641.993 1076.33  -2
   0 -20  -6 641.993 1076.33   1
   0  20   7 1455.41 922.396  -2
   0 -20  -7 1455.41 922.396   1
   0  20   8 642.831 625.288  -2
   0 -20  -8 642.831 625.288   1
   0  20   9 641.242 441.745  -2
   0 -20  -9 641.242 441.745   1
   0  20  10 7765.57 950.157  -2
   0 -20 -10 7765.57 950.157   1
   0 -20  11 2544.09 754.833  -2
   0  20 -11 2544.09 754.833   1
   0  20  12 8145.91 827.682  -2
   0 -20 -12 8145.91 827.682   1
   0  20  13 410.954 362.505  -2
   0 -20 -13 410.954 362.505   1
   0 -20  14 4706.26 604.247  -2
   0  20 -14 4706.26 604.247   1
   0  21   0 102.924 761.781  -2
   0 -21   0 102.924 761.781   1
   0  21  -1 2355.54 835.075  -2
   0 -21   1 2355.54 835.075   1
   0 -21   2 7486.68 955.809  -2
   0  21  -2 7486.68 955.809   1
   0 -21   3 6288.34 1015.87  -2
   0  21  -3 6288.34 1015.87   1
   0  21   4 6391.27 939.888  -2
   0 -21  -4 6391.27 939.888   1
   0  21   5 2576.96 972.112  -2
   0 -21  -5 2576.96 972.112   1
   0  21   6 4388.92 1018.07  -2
   0 -21  -6 4388.92 1018.07   1
   0  21   7 3891.34 973.133  -2
   0 -21  -7 3891.34 973.133   1
   0  21   8 17357.9 1191.55  -2
   0 -21  -8 17357.9 1191.55   1
   0  21   9 6975.09 907.970  -2
   0 -21  -9 6975.09 907.970   1
   0  21  10 24530.2 1254.98  -2
   0 -21 -10 24530.2 1254.98   1
   0  21  11 10554.4 762.386  -2
   0 -21 -11 10554.4 762.386   1
   0 -21  12 13460.8 765.482  -2
   0  21 -12 13460.8 765.482   1
   0 -21  13 6534.87 584.056  -2
   0  21 -13 6534.87 584.056   1
   0  22   0 124196. 2447.54  -2
   0 -22   0 124196. 2447.54   1
   0 -22  -1 73282.3 1965.14  -2
   0  22   1 73282.3 1965.14   1
   0  22  -2 71821.0 1910.41  -2
   0 -22   2 71821.0 1910.41   1
   0  22   3 25606.6 1583.95  -2
   0 -22  -3 25606.6 1583.95   1
   0  22   4 11275.0 1001.10  -2
   0 -22  -4 11275.0 1001.10   1
   0  22   5 4424.82 937.996  -2
   0 -22  -5 4424.82 937.996   1
   0  22   6 263.160 794.633  -2
   0 -22  -6 263.160 794.633   1
   0  22   7 899.914 793.579  -2
   0 -22  -7 899.914 793.579   1
   0  22   8 3927.65 813.122  -2
   0 -22  -8 3927.65 813.122   1
   0  22   9 556.459 664.034  -2
   0 -22  -9 556.459 664.034   1
   0 -22  10 25157.1 947.703  -2
   0  22 -10 25157.1 947.703   1
   0  22  11 20334.7 816.410  -2
   0 -22 -11 20334.7 816.410   1
   0  23   0 347.753 671.287  -2
   0 -23   0 347.753 671.287   1
   0 -23  -1 4263.29 761.931  -2
   0  23   1 4263.29 761.931   1
   0  23   2 6905.74 817.818  -2
   0 -23  -2 6905.74 817.818   1
   0  23   3 18220.8 1297.66  -2
   0 -23  -3 18220.8 1297.66   1
   0  23   4 15435.7 1053.82  -2
   0 -23  -4 15435.7 1053.82   1
   0 -23  -5 43006.3 1476.35  -2
   0  23   5 43006.3 1476.35   1
   0  23   6 26691.5 1211.93  -2
   0 -23  -6 26691.5 1211.93   1
   0  23   7 61645.2 1601.08  -2
   0 -23  -7 61645.2 1601.08   1
   0  23   8 27726.0 1110.76  -2
   0 -23  -8 27726.0 1110.76   1
   0  23   9 61949.5 1458.40  -2
   0 -23  -9 61949.5 1458.40   1
   0 -23 -10 25853.6 926.589  -2
   0  23  10 25853.6 926.589   1
   0  24   0 23215.9 2379.19  -2
   0 -24   0 23215.9 2379.19   1
   0  24  -1 73977.4 2377.44  -2
   0 -24   1 73977.4 2377.44   1
   0 -24   2 37956.2 1129.13  -2
   0  24  -2 37956.2 1129.13   1
   0  24   3 67511.1 2268.28  -2
   0 -24  -3 67511.1 2268.28   1
   0  24   4 14598.4 885.836  -2
   0 -24  -4 14598.4 885.836   1
   0 -24  -5 28374.1 1259.08  -2
   0  24   5 28374.1 1259.08   1
   0  24   6 806.761 528.836  -2
   0 -24  -6 806.761 528.836   1
   0  24   7 200.591 494.277  -2
   0 -24  -7 200.591 494.277   1
   0 -25   0 8.31934 370.339  -2
   0  25   0 8.31934 370.339   1
   0 -25  -1 488.422 418.072  -2
   0  25   1 488.422 418.072   1
   0  25   2 218.512 274.377  -2
   0 -25  -2 218.512 274.377   1
   0 -25  -3 6608.49 955.761  -2
   0  25   3 6608.49 955.761   1
   0 -25  -4 536.473 433.765  -2
   0  25   4 536.473 433.765   1
   1   0  23 38822.1 884.962  -2
   1   0 -24 38822.1 884.962   1
   1   0  22 28339.3 1067.20  -2
   1   0 -23 28339.3 1067.20   1
   1   0  21 74592.0 1887.39  -2
   1   0 -22 74592.0 1887.39   1
   1   0  20 40403.8 1690.74  -2
   1   0 -21 40403.8 1690.74   1
   1   0  19 67268.9 2244.28  -2
   1   0 -20 67268.9 2244.28   1
   1   0  18 17844.7 1544.86  -2
   1   0 -19 17844.7 1544.86   1
   1   0  17 20715.6 1670.02  -2
   1   0 -18 20715.6 1670.02   1
   1   0  16 20359.1 1725.30  -2
   1   0 -17 20359.1 1725.30   1
   1   0  15 8831.99 5172.40  -2
   1   0 -16 8831.99 5172.40   1
   1   0  14 6011.43 1799.94  -2
   1   0 -15 6011.43 1799.94   1
   1   0  13 1393.74 1532.57  -2
   1   0 -14 1393.74 1532.57   1
  -1   0 -12 21195.6 3106.90  -2
  -1   0  13 21195.6 3106.90   1
   1   0  11 138951. 16595.4  -2
   1   0 -12 138951. 16595.4   1
  -1   0 -10 190373. 19519.1  -2
  -1   0  11 190373. 19519.1   1
  -1   0  -9 253149. 7990.05  -2
  -1   0  10 253149. 7990.05   1
   1   0   8 192953. 42744.7  -2
   1   0  -9 192953. 42744.7   1
  -1   0  -7 162861. 6546.29  -2
  -1   0   8 162861. 6546.29   1
   1   0   6 178571. 10276.3  -2
   1   0  -7 178571. 10276.3   1
   1   0   5 224103. 8034.90  -2
   1   0  -6 224103. 8034.90   1
  -1   0  -4 240593. 3774.95  -2
  -1   0   5 240593. 3774.95   1
   1   0   3 314932. 12280.2  -2
   1   0  -4 314932. 12280.2   1
  -1   0  -2 60371.1 1533.69  -2
  -1   0   3 60371.1 1533.69   1
  -1   0  -1 157226. 64822.3  -2
  -1   0   2 157226. 64822.3   1
  -1   0   0 7989.95 891.076  -2
  -1   0   1 7989.95 891.076   1
  -1   0   1 11101.6 1378.28  -2
  -1   0   0 11101.6 1378.28   1
  -1   0   2 104108. 16434.6  -2
  -1   0  -1 104108. 16434.6   1
  -1   0   3 105083. 5383.67  -2
  -1   0  -2 105083. 5383.67   1
  -1   0   4 160883. 22302.2  -2
  -1   0  -3 160883. 22302.2   1
  -1   0   5 504104. 5349.81  -2
  -1   0  -4 504104. 5349.81   1
  -1   0   6 94411.4 2922.30  -2
  -1   0  -5 94411.4 2922.30   1
  -1   0   7 351398. 6019.69  -2
  -1   0  -6 351398. 6019.69   1
  -1   0   8 72694.9 3257.72  -2
  -1   0  -7 72694.9 3257.72   1
   1   0  -9 315094. 23087.6  -2
   1   0   8 315094. 23087.6   1
  -1   0  10 212013. 198915.  -2
  -1   0  -9 212013. 198915.   1
   1   0 -11 405764. 288424.  -2
   1   0  10 405764. 288424.   1
   1   0 -12 85129.9 140269.  -2
   1   0  11 85129.9 140269.   1
  -1   0  13 26793.0 2699.26  -2
  -1   0 -12 26793.0 2699.26   1
  -1   0  14-323.431 1222.22  -2
  -1   0 -13-323.431 1222.22   1
   1   0 -15 5232.83 2256.93  -2
   1   0  14 5232.83 2256.93   1
   1   0 -16 1596.28 2274.69  -2
   1   0  15 1596.28 2274.69   1
  -1   0  17 35802.6 2057.25  -2
  -1   0 -16 35802.6 2057.25   1
  -1   0  18 10090.4 1437.90  -2
  -1   0 -17 10090.4 1437.90   1
  -1   0  19 35766.1 1935.95  -2
  -1   0 -18 35766.1 1935.95   1
  -1   0  20 33415.8 1790.38  -2
  -1   0 -19 33415.8 1790.38   1
  -1   0  21 78862.3 2204.68  -2
  -1   0 -20 78862.3 2204.68   1
  -1   0  22 33117.0 1435.01  -2
  -1   0 -21 33117.0 1435.01   1
  -1   0  23 53061.0 1370.38  -2
  -1   0 -22 53061.0 1370.38   1
  -1   0  24 18521.1 699.878  -2
  -1   0 -23 18521.1 699.878   1
   1  -1  23 3503.31 513.795  -2
   1   1 -24 3503.31 513.795   1
   1  -1  22 5385.41 704.520  -2
   1   1 -23 5385.41 704.520   1
   1   1  21 2098.86 813.310  -2
   1  -1 -22 2098.86 813.310   1
   1  -1  20 7693.60 1099.43  -2
   1   1 -21 7693.60 1099.43   1
   1   1  19 5163.79 1128.06  -2
   1  -1 -20 5163.79 1128.06   1
   1   1  18 35458.2 1880.92  -2
   1  -1 -19 35458.2 1880.92   1
   1  -1  17 22295.9 1670.36  -2
   1   1 -18 22295.9 1670.36   1
   1  -1  16 42339.7 2101.11  -2
   1   1 -17 42339.7 2101.11   1
  -1  -1 -15 41516.6 2053.35  -2
  -1   1  16 41516.6 2053.35   1
  -1  -1 -14 97324.2 3842.11  -2
  -1   1  15 97324.2 3842.11   1
   1   1  13 147013. 4955.59  -2
   1  -1 -14 147013. 4955.59   1
  -1   1 -12 134850. 4845.97  -2
  -1  -1  13 134850. 4845.97   1
   1   1  11 232980. 5845.80  -2
   1  -1 -12 232980. 5845.80   1
  -1  -1 -10 52899.7 2895.97  -2
  -1   1  11 52899.7 2895.97   1
   1  -1   9 63512.2 3190.86  -2
   1   1 -10 63512.2 3190.86   1
  -1  -1  -8 10396.2 1630.18  -2
  -1   1   9 10396.2 1630.18   1
   1   1   7 13420.1 1598.45  -2
   1  -1  -8 13420.1 1598.45   1
   1  -1   6 98966.5 3675.18  -2
   1   1  -7 98966.5 3675.18   1
   1  -1   5 36793.8 1954.36  -2
   1   1  -6 36793.8 1954.36   1
   1  -1   4 126929. 2924.58  -2
   1   1  -5 126929. 2924.58   1
   1  -1   3 150909. 3345.25  -2
   1   1  -4 150909. 3345.25   1
  -1   1  -2 128857. 1730.96  -2
  -1  -1   3 128857. 1730.96   1
  -1   1  -1 224401. 2126.87  -2
  -1  -1   2 224401. 2126.87   1
   1  -1   0 338730. 5570.05  -2
   1   1  -1 338730. 5570.05   1
  -1   1   1 558646. 6954.78  -2
  -1  -1   0 558646. 6954.78   1
   1  -1  -2 115394. 5018.42  -2
   1   1   1 115394. 5018.42   1
   1   1  -3 238035. 3584.93  -2
   1  -1   2 238035. 3584.93   1
   1   1  -4 86603.8 2077.02  -2
   1  -1   3 86603.8 2077.02   1
  -1   1   5 152364. 7322.18  -2
  -1  -1  -4 152364. 7322.18   1
  -1   1   6 22560.2 1847.43  -2
  -1  -1  -5 22560.2 1847.43   1
  -1  -1   7 53289.5 2656.16  -2
  -1   1  -6 53289.5 2656.16   1
   1   1  -8 19484.8 2077.23  -2
   1  -1   7 19484.8 2077.23   1
  -1  -1   9 6093.27 1630.26  -2
  -1   1  -8 6093.27 1630.26   1
  -1  -1  10 26903.1 8028.50  -2
  -1   1  -9 26903.1 8028.50   1
  -1  -1  11 57592.3 3807.67  -2
  -1   1 -10 57592.3 3807.67   1
  -1   1  12 111991. 3972.28  -2
  -1  -1 -11 111991. 3972.28   1
   1  -1 -13 216489. 7681.24  -2
   1   1  12 216489. 7681.24   1
  -1  -1  14 59585.1 3521.58  -2
  -1   1 -13 59585.1 3521.58   1
   1  -1 -15 192465. 6494.23  -2
   1   1  14 192465. 6494.23   1
   1  -1 -16 22028.0 1755.36  -2
   1   1  15 22028.0 1755.36   1
  -1  -1  17 84350.7 2770.73  -2
  -1   1 -16 84350.7 2770.73   1
  -1   1  18 14423.5 1509.01  -2
  -1  -1 -17 14423.5 1509.01   1
  -1   1  19 63944.1 4029.53  -2
  -1  -1 -18 63944.1 4029.53   1
  -1  -1  20 5984.72 1151.39  -2
  -1   1 -19 5984.72 1151.39   1
  -1   1  21 8060.28 1071.17  -2
  -1  -1 -20 8060.28 1071.17   1
  -1  -1  22 3958.54 840.849  -2
  -1   1 -21 3958.54 840.849   1
  -1  -1  23 2631.23 649.886  -2
  -1   1 -22 2631.23 649.886   1
  -1  -1  24 2280.36 493.658  -2
  -1   1 -23 2280.36 493.658   1
   1  -2  23 27976.0 852.769  -2
   1   2 -24 27976.0 852.769   1
   1   2  22 7692.76 1576.38  -2
   1  -2 -23 7692.76 1576.38   1
   1   2  21 30042.1 1280.59  -2
   1  -2 -22 30042.1 1280.59   1
   1   2  20 17435.8 2958.14  -2
   1  -2 -21 17435.8 2958.14   1
   1   2  19 27586.9 1587.13  -2
   1  -2 -20 27586.9 1587.13   1
   1  -2  18 35937.8 1882.84  -2
   1   2 -19 35937.8 1882.84   1
   1   2  17 5615.13 1250.52  -2
   1  -2 -18 5615.13 1250.52   1
   1  -2  16 20446.8 1882.68  -2
   1   2 -17 20446.8 1882.68   1
   1   2  15 7806.17 1471.86  -2
   1  -2 -16 7806.17 1471.86   1
   1  -2  14 62376.9 3089.12  -2
   1   2 -15 62376.9 3089.12   1
  -1  -2 -13 18218.3 2302.31  -2
  -1   2  14 18218.3 2302.31   1
   1  -2  12 50115.7 3179.14  -2
   1   2 -13 50115.7 3179.14   1
   1   2  11 66097.6 3261.12  -2
   1  -2 -12 66097.6 3261.12   1
  -1  -2 -10 56365.6 3158.39  -2
  -1   2  11 56365.6 3158.39   1
   1  -2   9 157514. 4396.71  -2
   1   2 -10 157514. 4396.71   1
  -1  -2  -8 42067.5 2371.72  -2
  -1   2   9 42067.5 2371.72   1
  -1  -2  -7 212546. 3948.94  -2
  -1   2   8 212546. 3948.94   1
  -1   2  -6 175227. 3682.76  -2
  -1  -2   7 175227. 3682.76   1
  -1   2  -5 138738. 4178.15  -2
  -1  -2   6 138738. 4178.15   1
   1   2   4 98995.6 2607.21  -2
   1  -2  -5 98995.6 2607.21   1
   1  -2   3 82816.9 1748.10  -2
   1   2  -4 82816.9 1748.10   1
  -1  -2  -2 83142.2 2015.64  -2
  -1   2   3 83142.2 2015.64   1
   1  -2   1 12053.9 867.971  -2
   1   2  -2 12053.9 867.971   1
  -1  -2   0 57643.0 1350.71  -2
  -1   2   1 57643.0 1350.71   1
   1   2  -1 46238.9 941.846  -2
   1  -2   0 46238.9 941.846   1
   1  -2  -2 18284.0 643.496  -2
   1   2   1 18284.0 643.496   1
   1  -2  -3 64315.7 1479.01  -2
   1   2   2 64315.7 1479.01   1
  -1  -2   4 152430. 5223.06  -2
  -1   2  -3 152430. 5223.06   1
   1   2  -5 114847. 2897.31  -2
   1  -2   4 114847. 2897.31   1
  -1  -2   6 59074.5 4349.34  -2
  -1   2  -5 59074.5 4349.34   1
  -1  -2   7 235111. 11618.2  -2
  -1   2  -6 235111. 11618.2   1
  -1   2   8 126912. 9871.63  -2
  -1  -2  -7 126912. 9871.63   1
  -1   2   9 65372.7 7262.27  -2
  -1  -2  -8 65372.7 7262.27   1
  -1  -2  10 119719. 3704.09  -2
  -1   2  -9 119719. 3704.09   1
   1  -2 -11 64750.6 2971.72  -2
   1   2  10 64750.6 2971.72   1
   1  -2 -12 43856.6 3206.05  -2
   1   2  11 43856.6 3206.05   1
   1  -2 -13 24910.8 2795.20  -2
   1   2  12 24910.8 2795.20   1
  -1  -2  14 15360.1 2378.55  -2
  -1   2 -13 15360.1 2378.55   1
  -1  -2  15 32487.4 2876.12  -2
  -1   2 -14 32487.4 2876.12   1
   1   2 -16 9910.59 1750.13  -2
   1  -2  15 9910.59 1750.13   1
  -1   2  17 21519.1 1675.44  -2
  -1  -2 -16 21519.1 1675.44   1
  -1   2  18 2198.90 1154.83  -2
  -1  -2 -17 2198.90 1154.83   1
  -1  -2  19 46544.0 2104.01  -2
  -1   2 -18 46544.0 2104.01   1
  -1  -2  20 16389.2 1400.12  -2
  -1   2 -19 16389.2 1400.12   1
  -1  -2  21 26652.5 1463.84  -2
  -1   2 -20 26652.5 1463.84   1
  -1   2  22 18680.6 1432.41  -2
  -1  -2 -21 18680.6 1432.41   1
  -1  -2  23 14508.3 1049.42  -2
  -1   2 -22 14508.3 1049.42   1
  -1  -2  24 15096.6 728.074  -2
  -1   2 -23 15096.6 728.074   1
   1  -3  22 36814.7 1216.14  -2
   1   3 -23 36814.7 1216.14   1
   1   3  21 5175.12 799.469  -2
   1  -3 -22 5175.12 799.469   1
   1   3  20 40675.1 1599.63  -2
   1  -3 -21 40675.1 1599.63   1
   1   3  19 14883.6 1281.61  -2
   1  -3 -20 14883.6 1281.61   1
   1   3  18 12980.7 1336.40  -2
   1  -3 -19 12980.7 1336.40   1
   1  -3  17 21107.1 2856.19  -2
   1   3 -18 21107.1 2856.19   1
   1   3  16 12980.4 1433.59  -2
   1  -3 -17 12980.4 1433.59   1
   1  -3  15 38948.4 2113.86  -2
   1   3 -16 38948.4 2113.86   1
   1  -3  14 10362.7 1620.51  -2
   1   3 -15 10362.7 1620.51   1
  -1   3 -13 2700.25 1558.23  -2
  -1  -3  14 2700.25 1558.23   1
  -1  -3 -12 38199.6 4176.70  -2
  -1   3  13 38199.6 4176.70   1
  -1  -3 -11 2593.75 1402.97  -2
  -1   3  12 2593.75 1402.97   1
   1  -3  10 111153. 4116.30  -2
   1   3 -11 111153. 4116.30   1
   1  -3   9 3746.85 1301.89  -2
   1   3 -10 3746.85 1301.89   1
  -1  -3  -8 183118. 4889.16  -2
  -1   3   9 183118. 4889.16   1
  -1   3  -7 37973.8 1983.79  -2
  -1  -3   8 37973.8 1983.79   1
  -1  -3  -6 75163.3 2955.23  -2
  -1   3   7 75163.3 2955.23   1
   1  -3   5 30128.4 1675.31  -2
   1   3  -6 30128.4 1675.31   1
   1  -3   4 22654.6 1403.17  -2
   1   3  -5 22654.6 1403.17   1
  -1  -3  -3 229932. 3260.18  -2
  -1   3   4 229932. 3260.18   1
  -1   3  -2 95173.2 2333.65  -2
  -1  -3   3 95173.2 2333.65   1
  -1  -3  -1 54434.6 1859.80  -2
  -1   3   2 54434.6 1859.80   1
  -1   3   0 16352.7 973.104  -2
  -1  -3   1 16352.7 973.104   1
   1  -3  -1 26926.9 923.522  -2
   1   3   0 26926.9 923.522   1
   1  -3  -2 35296.3 840.129  -2
   1   3   1 35296.3 840.129   1
   1   3  -3 103911. 2285.56  -2
   1  -3   2 103911. 2285.56   1
   1  -3  -4 198607. 1715.80  -2
   1   3   3 198607. 1715.80   1
   1  -3  -5 27598.0 1509.19  -2
   1   3   4 27598.0 1509.19   1
  -1  -3   6 53675.7 1467.72  -2
  -1   3  -5 53675.7 1467.72   1
   1  -3  -7 40224.0 2322.67  -2
   1   3   6 40224.0 2322.67   1
   1   3  -8 61782.3 8652.97  -2
   1  -3   7 61782.3 8652.97   1
  -1  -3   9 126561. 3697.44  -2
  -1   3  -8 126561. 3697.44   1
   1  -3 -10 5786.50 1236.62  -2
   1   3   9 5786.50 1236.62   1
   1   3 -11 72574.6 4229.17  -2
   1  -3  10 72574.6 4229.17   1
  -1  -3  12 3580.37 1934.77  -2
  -1   3 -11 3580.37 1934.77   1
  -1  -3  13 39324.0 3360.59  -2
  -1   3 -12 39324.0 3360.59   1
   1   3 -14 922.324 1183.33  -2
   1  -3  13 922.324 1183.33   1
   1   3  14 15453.5 1190.78   1
   1   3 -15 21785.4 2053.34  -2
   1  -3  14 21785.4 2053.34   1
  -1  -3  16 28048.7 1956.96  -2
  -1   3 -15 28048.7 1956.96   1
  -1   3  17 14800.7 1506.04  -2
  -1  -3 -16 14800.7 1506.04   1
  -1   3  18 27112.2 1745.87  -2
  -1  -3 -17 27112.2 1745.87   1
  -1   3  19 8753.18 1278.49  -2
  -1  -3 -18 8753.18 1278.49   1
  -1  -3  20 18850.7 1392.43  -2
  -1   3 -19 18850.7 1392.43   1
  -1   3  21 18197.0 1268.38  -2
  -1  -3 -20 18197.0 1268.38   1
  -1   3  22 4209.49 873.737  -2
  -1  -3 -21 4209.49 873.737   1
  -1  -3  23 17130.0 991.602  -2
  -1   3 -22 17130.0 991.602   1
   1  -4  22 2167.55 650.687  -2
   1   4 -23 2167.55 650.687   1
   1  -4  21 256.318 745.574  -2
   1   4 -22 256.318 745.574   1
   1  -4  20 856.385 766.679  -2
   1   4 -21 856.385 766.679   1
   1  -4  19 666.169 920.231  -2
   1   4 -20 666.169 920.231   1
   1  -4  18 14015.6 1523.44  -2
   1   4 -19 14015.6 1523.44   1
   1   4  17 7891.72 1137.55  -2
   1  -4 -18 7891.72 1137.55   1
   1  -4  16 20217.7 1520.67  -2
   1   4 -17 20217.7 1520.67   1
  -1  -4 -15 26657.9 1885.08  -2
  -1   4  16 26657.9 1885.08   1
   1  -4  14 18914.2 1734.13  -2
   1   4 -15 18914.2 1734.13   1
  -1  -4 -13 110414. 8275.20  -2
  -1   4  14 110414. 8275.20   1
  -1   4 -12 45314.8 3018.31  -2
  -1  -4  13 45314.8 3018.31   1
  -1   4 -11 76259.7 3696.08  -2
  -1  -4  12 76259.7 3696.08   1
   1  -4  10 86129.1 3549.08  -2
   1   4 -11 86129.1 3549.08   1
  -1  -4  -9 29330.8 2127.94  -2
  -1   4  10 29330.8 2127.94   1
   1  -4   8 63607.5 2965.88  -2
   1   4  -9 63607.5 2965.88   1
  -1   4  -7 10330.8 1527.31  -2
  -1  -4   8 10330.8 1527.31   1
  -1   4  -6 7308.15 1208.83  -2
  -1  -4   7 7308.15 1208.83   1
   1  -4   5 22917.8 1553.75  -2
   1   4  -6 22917.8 1553.75   1
   1  -4   4 26602.4 1486.77  -2
   1   4  -5 26602.4 1486.77   1
   1   4   3 138653. 3298.96  -2
   1  -4  -4 138653. 3298.96   1
   1  -4   2 103508. 3491.87  -2
   1   4  -3 103508. 3491.87   1
   1  -4   1 133985. 2479.40  -2
   1   4  -2 133985. 2479.40   1
   1  -4   0 144271. 3240.94  -2
   1   4  -1 144271. 3240.94   1
   1  -4  -1 99445.1 1396.61  -2
   1   4   0 99445.1 1396.61   1
   1  -4  -2 101470. 1910.57  -2
   1   4   1 101470. 1910.57   1
   1  -4  -3 67758.4 2281.54  -2
   1   4   2 67758.4 2281.54   1
   1   4  -4 140485. 2101.17  -2
   1  -4   3 140485. 2101.17   1
   1   4  -5 43094.2 1276.63  -2
   1  -4   4 43094.2 1276.63   1
   1   4  -6 18054.1 1164.67  -2
   1  -4   5 18054.1 1164.67   1
   1   4  -7 10517.9 1121.28  -2
   1  -4   6 10517.9 1121.28   1
   1   4  -8 6959.92 1121.05  -2
   1  -4   7 6959.92 1121.05   1
   1  -4  -9 37738.1 1573.06  -2
   1   4   8 37738.1 1573.06   1
   1  -4 -10 19147.0 1927.53  -2
   1   4   9 19147.0 1927.53   1
   1   4 -11 60347.5 5177.21  -2
   1  -4  10 60347.5 5177.21   1
   1   4 -12 37237.1 3470.63  -2
   1  -4  11 37237.1 3470.63   1
   1  -4 -13 25387.0 2428.10  -2
   1   4  12 25387.0 2428.10   1
   1  -4 -14 56782.0 4193.50  -2
   1   4  13 56782.0 4193.50   1
  -1  -4  15 12573.6 1628.25  -2
  -1   4 -14 12573.6 1628.25   1
  -1   4  16 26335.6 1850.55  -2
  -1  -4 -15 26335.6 1850.55   1
  -1  -4  17 13448.3 1348.59  -2
  -1   4 -16 13448.3 1348.59   1
  -1   4  18 3633.46 1076.56  -2
  -1  -4 -17 3633.46 1076.56   1
  -1   4  19 7527.03 1185.52  -2
  -1  -4 -18 7527.03 1185.52   1
  -1   4  20 859.450 934.892  -2
  -1  -4 -19 859.450 934.892   1
  -1   4  21 708.819 781.500  -2
  -1  -4 -20 708.819 781.500   1
  -1  -4  22 181.641 746.943  -2
  -1   4 -21 181.641 746.943   1
  -1  -4  23 2950.45 677.067  -2
  -1   4 -22 2950.45 677.067   1
   1  -5  22 10939.5 781.942  -2
   1   5 -23 10939.5 781.942   1
   1  -5  21 13776.3 978.746  -2
   1   5 -22 13776.3 978.746   1
   1  -5  20 35470.5 1522.56  -2
   1   5 -21 35470.5 1522.56   1
   1  -5  19 10901.7 1194.51  -2
   1   5 -20 10901.7 1194.51   1
   1  -5  18 52164.2 1883.75  -2
   1   5 -19 52164.2 1883.75   1
   1  -5  17 4542.70 1456.86  -2
   1   5 -18 4542.70 1456.86   1
   1  -5  16 18165.3 1359.00  -2
   1   5 -17 18165.3 1359.00   1
   1  -5  15 3547.97 1180.56  -2
   1   5 -16 3547.97 1180.56   1
  -1  -5 -14 12470.1 1371.78  -2
  -1   5  15 12470.1 1371.78   1
   1  -5  13 61970.0 6117.50  -2
   1   5 -14 61970.0 6117.50   1
   1  -5  12 10455.0 1907.83  -2
   1   5 -13 10455.0 1907.83   1
   1  -5  11 85741.4 3850.77  -2
   1   5 -12 85741.4 3850.77   1
  -1   5 -10 475.397 933.357  -2
  -1  -5  11 475.397 933.357   1
  -1   5  -9 74172.1 5214.55  -2
  -1  -5  10 74172.1 5214.55   1
  -1   5  -8 64001.4 2649.10  -2
  -1  -5   9 64001.4 2649.10   1
  -1   5  -7 35043.4 1990.73  -2
  -1  -5   8 35043.4 1990.73   1
  -1  -5  -6 131841. 3471.43  -2
  -1   5   7 131841. 3471.43   1
  -1  -5  -5 57118.3 2429.21  -2
  -1   5   6 57118.3 2429.21   1
   1  -5   4 22716.6 1407.95  -2
   1   5  -5 22716.6 1407.95   1
   1  -5   3 13668.5 667.786  -2
   1   5  -4 13668.5 667.786   1
   1  -5   2 133417. 3984.27  -2
   1   5  -3 133417. 3984.27   1
  -1  -5  -1 59129.4 2579.62  -2
  -1   5   2 59129.4 2579.62   1
   1  -5   0 36262.1 2071.49  -2
   1   5  -1 36262.1 2071.49   1
   1  -5  -1 33280.7 1728.42  -2
   1   5   0 33280.7 1728.42   1
   1   5  -2 64269.1 2289.72  -2
   1  -5   1 64269.1 2289.72   1
  -1  -5   3 130517. 2894.68  -2
  -1   5  -2 130517. 2894.68   1
   1   5  -4 16168.1 711.401  -2
   1  -5   3 16168.1 711.401   1
   1  -5  -5 29597.6 1630.32  -2
   1   5   4 29597.6 1630.32   1
   1   5  -6 33549.0 1417.15  -2
   1  -5   5 33549.0 1417.15   1
   1   5  -7 108143. 2402.74  -2
   1  -5   6 108143. 2402.74   1
  -1  -5   8 18021.7 1847.66  -2
  -1   5  -7 18021.7 1847.66   1
   1  -5  -9 47639.7 3115.47  -2
   1   5   8 47639.7 3115.47   1
  -1  -5  10 59441.7 3033.14  -2
  -1   5  -9 59441.7 3033.14   1
   1  -5 -11 819.397 1401.42  -2
   1   5  10 819.397 1401.42   1
  -1  -5  12 80878.2 4205.07  -2
  -1   5 -11 80878.2 4205.07   1
  -1  -5  13 5491.90 2031.33  -2
  -1   5 -12 5491.90 2031.33   1
   1   5 -14 78420.4 4065.36  -2
   1  -5  13 78420.4 4065.36   1
  -1  -5  15 12622.8 1742.89  -2
  -1   5 -14 12622.8 1742.89   1
  -1  -5  16 7811.15 1195.29  -2
  -1   5 -15 7811.15 1195.29   1
  -1  -5  17 10606.7 1329.89  -2
  -1   5 -16 10606.7 1329.89   1
  -1  -5  18 2003.42 1029.23  -2
  -1   5 -17 2003.42 1029.23   1
  -1  -5  19 26658.4 1562.21  -2
  -1   5 -18 26658.4 1562.21   1
  -1  -5  20 5523.82 1108.79  -2
  -1   5 -19 5523.82 1108.79   1
  -1  -5  21 23119.8 1376.77  -2
  -1   5 -20 23119.8 1376.77   1
  -1  -5  22 8616.40 943.674  -2
  -1   5 -21 8616.40 943.674   1
  -1  -5  23 9662.85 807.981  -2
  -1   5 -22 9662.85 807.981   1
   1  -6  22 21008.8 904.916  -2
   1   6 -23 21008.8 904.916   1
   1  -6  21 18676.8 1023.75  -2
   1   6 -22 18676.8 1023.75   1
   1  -6  20 29194.0 1364.17  -2
   1   6 -21 29194.0 1364.17   1
   1  -6  19 18230.3 1178.08  -2
   1   6 -20 18230.3 1178.08   1
   1  -6  18 13218.0 1191.76  -2
   1   6 -19 13218.0 1191.76   1
   1  -6  17 18536.6 1363.43  -2
   1   6 -18 18536.6 1363.43   1
   1  -6  16 2886.66 1047.62  -2
   1   6 -17 2886.66 1047.62   1
   1  -6  15 75186.5 2444.33  -2
   1   6 -16 75186.5 2444.33   1
   1  -6  14 5179.40 1296.29  -2
   1   6 -15 5179.40 1296.29   1
   1  -6  13 26840.2 2242.25  -2
   1   6 -14 26840.2 2242.25   1
  -1  -6 -12 54720.6 4474.48  -2
  -1   6  13 54720.6 4474.48   1
   1  -6  11 19724.9 2050.17  -2
   1   6 -12 19724.9 2050.17   1
   1  -6  10 155627. 4388.03  -2
   1   6 -11 155627. 4388.03   1
  -1   6  -9 56846.1 6799.52  -2
  -1  -6  10 56846.1 6799.52   1
   1  -6   8 220470. 24569.9  -2
   1   6  -9 220470. 24569.9   1
   1  -6   7 88127.3 3272.97  -2
   1   6  -8 88127.3 3272.97   1
   1  -6   6 199355. 4698.48  -2
   1   6  -7 199355. 4698.48   1
   1  -6   5 57581.1 3825.32  -2
   1   6  -6 57581.1 3825.32   1
  -1   6  -4 69555.0 2207.72  -2
  -1  -6   5 69555.0 2207.72   1
  -1   6  -3 179166. 4301.83  -2
  -1  -6   4 179166. 4301.83   1
  -1   6  -2 5956.97 1162.21  -2
  -1  -6   3 5956.97 1162.21   1
   1  -6   1 87734.6 3119.17  -2
   1   6  -2 87734.6 3119.17   1
   1  -6   0 177375. 3993.08  -2
   1   6  -1 177375. 3993.08   1
   1   6  -1 189449. 9493.17  -2
   1  -6   0 189449. 9493.17   1
   1   6  -2 60643.0 1704.80  -2
   1  -6   1 60643.0 1704.80   1
   1   6  -3 7957.84 1373.31  -2
   1  -6   2 7957.84 1373.31   1
   1   6  -4 147450. 3940.66  -2
   1  -6   3 147450. 3940.66   1
  -1  -6   5 40270.2 1669.22  -2
  -1   6  -4 40270.2 1669.22   1
   1  -6  -6 85099.6 2105.04  -2
   1   6   5 85099.6 2105.04   1
   1  -6  -7 115038. 2457.28  -2
   1   6   6 115038. 2457.28   1
   1   6  -8 134839. 3516.14  -2
   1  -6   7 134839. 3516.14   1
   1  -6  -9 157803. 5575.17  -2
   1   6   8 157803. 5575.17   1
   1   6 -10 117399. 4120.91  -2
   1  -6   9 117399. 4120.91   1
  -1  -6  11 118539. 4917.23  -2
  -1   6 -10 118539. 4917.23   1
  -1  -6  12 17135.6 2407.78  -2
  -1   6 -11 17135.6 2407.78   1
  -1  -6  13 81985.9 16512.6  -2
  -1   6 -12 81985.9 16512.6   1
  -1  -6  14 12398.5 1817.43  -2
  -1   6 -13 12398.5 1817.43   1
   1  -6 -15 4684.71 1281.31  -2
   1   6  14 4684.71 1281.31   1
  -1  -6  16 40773.7 1809.51  -2
  -1   6 -15 40773.7 1809.51   1
  -1  -6  17 556.440 631.297  -2
  -1   6 -16 556.440 631.297   1
  -1  -6  18 14686.8 1517.31  -2
  -1   6 -17 14686.8 1517.31   1
  -1  -6  19 8645.71 1159.90  -2
  -1   6 -18 8645.71 1159.90   1
  -1  -6  20 26470.2 1386.28  -2
  -1   6 -19 26470.2 1386.28   1
  -1  -6  21 21490.4 1281.13  -2
  -1   6 -20 21490.4 1281.13   1
  -1  -6  22 40923.7 1428.96  -2
  -1   6 -21 40923.7 1428.96   1
  -1  -6  23 15702.5 876.541  -2
  -1   6 -22 15702.5 876.541   1
   1  -7  22 3262.05 566.808  -2
   1   7 -23 3262.05 566.808   1
   1  -7  21 6137.09 769.298  -2
   1   7 -22 6137.09 769.298   1
   1  -7  20 2748.27 690.044  -2
   1   7 -21 2748.27 690.044   1
   1  -7  19 10035.3 1079.21  -2
   1   7 -20 10035.3 1079.21   1
   1  -7  18 31875.8 1467.09  -2
   1   7 -19 31875.8 1467.09   1
   1  -7  17 39447.5 1944.15  -2
   1   7 -18 39447.5 1944.15   1
   1  -7  16 89391.0 2760.40  -2
   1   7 -17 89391.0 2760.40   1
   1  -7  15 76289.9 2492.24  -2
   1   7 -16 76289.9 2492.24   1
   1  -7  14 70191.0 2595.18  -2
   1   7 -15 70191.0 2595.18   1
   1  -7  13 93636.2 3547.81  -2
   1   7 -14 93636.2 3547.81   1
  -1  -7 -12 83530.0 4130.74  -2
  -1   7  13 83530.0 4130.74   1
  -1  -7 -11 102043. 16078.5  -2
  -1   7  12 102043. 16078.5   1
   1  -7  10 53444.2 3257.36  -2
   1   7 -11 53444.2 3257.36   1
  -1   7  -9 78303.2 2978.39  -2
  -1  -7  10 78303.2 2978.39   1
   1  -7   8 12600.2 1481.79  -2
   1   7  -9 12600.2 1481.79   1
   1  -7   7 5557.21 1203.32  -2
   1   7  -8 5557.21 1203.32   1
  -1   7  -6 1386.18 1144.93  -2
  -1  -7   7 1386.18 1144.93   1
  -1   7  -5 34351.9 2469.06  -2
  -1  -7   6 34351.9 2469.06   1
   1  -7   4 88829.6 2867.16  -2
   1   7  -5 88829.6 2867.16   1
  -1  -7  -3 198007. 4662.35  -2
  -1   7   4 198007. 4662.35   1
   1  -7   2 228434. 4030.74  -2
   1   7  -3 228434. 4030.74   1
   1   7   1 100971. 2472.20  -2
   1  -7  -2 100971. 2472.20   1
  -1   7   0 205083. 3705.23  -2
  -1  -7   1 205083. 3705.23   1
  -1  -7   1 123371. 2113.29  -2
  -1   7   0 123371. 2113.29   1
   1  -7  -2 209651. 3390.74  -2
   1   7   1 209651. 3390.74   1
   1   7  -3 114005. 2959.36  -2
   1  -7   2 114005. 2959.36   1
   1  -7  -4 319052. 8154.76  -2
   1   7   3 319052. 8154.76   1
   1   7  -5 54971.0 1932.81  -2
   1  -7   4 54971.0 1932.81   1
   1  -7  -6 81903.1 2166.36  -2
   1   7   5 81903.1 2166.36   1
  -1  -7   7 180.171 642.026  -2
  -1   7  -6 180.171 642.026   1
  -1  -7   8 4152.64 1451.51  -2
  -1   7  -7 4152.64 1451.51   1
  -1  -7   9 6902.52 1595.87  -2
  -1   7  -8 6902.52 1595.87   1
   1  -7 -10 85029.2 7769.91  -2
   1   7   9 85029.2 7769.91   1
  -1  -7  11 24003.7 2922.83  -2
  -1   7 -10 24003.7 2922.83   1
   1   7 -12 163094. 32026.4  -2
   1  -7  11 163094. 32026.4   1
  -1  -7  13 38865.0 3188.90  -2
  -1   7 -12 38865.0 3188.90   1
  -1  -7  14 141958. 3018.35  -2
  -1   7 -13 141958. 3018.35   1
  -1  -7  15 36075.1 2527.38  -2
  -1   7 -14 36075.1 2527.38   1
  -1  -7  16 105968. 2922.82  -2
  -1   7 -15 105968. 2922.82   1
  -1  -7  17 51851.2 1918.79  -2
  -1   7 -16 51851.2 1918.79   1
  -1  -7  18 81800.9 2847.87  -2
  -1   7 -17 81800.9 2847.87   1
  -1  -7  19 16012.8 1230.50  -2
  -1   7 -18 16012.8 1230.50   1
  -1  -7  20 14215.2 1157.88  -2
  -1   7 -19 14215.2 1157.88   1
  -1  -7  21 3999.75 763.422  -2
  -1   7 -20 3999.75 763.422   1
  -1  -7  22 3294.19 753.816  -2
  -1   7 -21 3294.19 753.816   1
  -1  -7  23 4845.16 626.995  -2
  -1   7 -22 4845.16 626.995   1
   1  -8  21 31633.0 1076.05  -2
   1   8 -22 31633.0 1076.05   1
   1  -8  20 44159.3 1690.18  -2
   1   8 -21 44159.3 1690.18   1
   1  -8  19 27853.0 1274.44  -2
   1   8 -20 27853.0 1274.44   1
   1  -8  18 44664.9 1660.90  -2
   1   8 -19 44664.9 1660.90   1
   1  -8  17 17611.3 1350.08  -2
   1   8 -18 17611.3 1350.08   1
   1  -8  16 46733.3 1957.65  -2
   1   8 -17 46733.3 1957.65   1
   1  -8  15 2666.92 1083.25  -2
   1   8 -16 2666.92 1083.25   1
   1  -8  14 1069.71 1057.61  -2
   1   8 -15 1069.71 1057.61   1
   1  -8  13 25041.7 1942.43  -2
   1   8 -14 25041.7 1942.43   1
  -1  -8 -12 17617.0 2377.92  -2
  -1   8  13 17617.0 2377.92   1
   1  -8  11 23165.2 2709.40  -2
   1   8 -12 23165.2 2709.40   1
   1  -8  10 40680.4 2357.79  -2
   1   8 -11 40680.4 2357.79   1
   1  -8   9 71163.7 11951.3  -2
   1   8 -10 71163.7 11951.3   1
   1  -8   8 191681. 4804.68  -2
   1   8  -9 191681. 4804.68   1
  -1   8  -7 142195. 7131.55  -2
  -1  -8   8 142195. 7131.55   1
   1  -8   6 242102. 11829.4  -2
   1   8  -7 242102. 11829.4   1
  -1   8  -5 158659. 7644.81  -2
  -1  -8   6 158659. 7644.81   1
   1  -8   4 262398. 21691.2  -2
   1   8  -5 262398. 21691.2   1
   1  -8   3 77532.6 2655.51  -2
   1   8  -4 77532.6 2655.51   1
  -1  -8  -2 56503.3 2793.18  -2
  -1   8   3 56503.3 2793.18   1
  -1   8  -1 5939.64 1098.29  -2
  -1  -8   2 5939.64 1098.29   1
   1   8   0 29761.5 1188.44  -2
   1  -8  -1 29761.5 1188.44   1
  -1   8   1 67322.3 3274.16  -2
  -1  -8   0 67322.3 3274.16   1
  -1  -8   2 2966.67 647.896  -2
  -1   8  -1 2966.67 647.896   1
   1   8  -3 39725.4 2074.59  -2
   1  -8   2 39725.4 2074.59   1
  -1  -8   4 160650. 5427.99  -2
  -1   8  -3 160650. 5427.99   1
   1   8  -5 193908. 4569.40  -2
   1  -8   4 193908. 4569.40   1
   1   8  -6 326791. 6533.08  -2
   1  -8   5 326791. 6533.08   1
   1  -8  -7 170708. 5389.98  -2
   1   8   6 170708. 5389.98   1
   1  -8  -8 299261. 8533.11  -2
   1   8   7 299261. 8533.11   1
  -1  -8   9 115952. 4166.74  -2
  -1   8  -8 115952. 4166.74   1
   1  -8 -10 149000. 20212.7  -2
   1   8   9 149000. 20212.7   1
   1   8 -11 26460.9 2646.27  -2
   1  -8  10 26460.9 2646.27   1
  -1  -8  12 36018.3 6075.90  -2
  -1   8 -11 36018.3 6075.90   1
   1   8 -13 11777.8 1587.96  -2
   1  -8  12 11777.8 1587.96   1
  -1  -8  14 39576.4 1949.45  -2
  -1   8 -13 39576.4 1949.45   1
  -1  -8  15 1844.58 1031.06  -2
  -1   8 -14 1844.58 1031.06   1
  -1  -8  16 2138.63 1050.76  -2
  -1   8 -15 2138.63 1050.76   1
  -1  -8  17 31916.2 1627.08  -2
  -1   8 -16 31916.2 1627.08   1
  -1  -8  18 33163.6 1630.08  -2
  -1   8 -17 33163.6 1630.08   1
  -1  -8  19 26951.7 1387.13  -2
  -1   8 -18 26951.7 1387.13   1
  -1  -8  20 60214.6 1740.24  -2
  -1   8 -19 60214.6 1740.24   1
  -1  -8  21 25808.6 1703.98  -2
  -1   8 -20 25808.6 1703.98   1
  -1  -8  22 62868.7 1527.60  -2
  -1   8 -21 62868.7 1527.60   1
   1  -9  21 2924.28 585.938  -2
   1   9 -22 2924.28 585.938   1
   1  -9  20 1102.18 569.418  -2
   1   9 -21 1102.18 569.418   1
   1  -9  19 13813.3 1162.77  -2
   1   9 -20 13813.3 1162.77   1
   1  -9  18 14324.8 1264.49  -2
   1   9 -19 14324.8 1264.49   1
   1  -9  17 29590.9 1544.24  -2
   1   9 -18 29590.9 1544.24   1
   1  -9  16 66747.1 2216.79  -2
   1   9 -17 66747.1 2216.79   1
   1  -9  15 81258.3 2542.62  -2
   1   9 -16 81258.3 2542.62   1
   1  -9  14 85001.3 2610.73  -2
   1   9 -15 85001.3 2610.73   1
  -1   9 -13 42416.5 2157.19  -2
  -1  -9  14 42416.5 2157.19   1
  -1  -9 -12 32771.7 2026.09  -2
  -1   9  13 32771.7 2026.09   1
   1  -9  11 57364.0 3735.01  -2
   1   9 -12 57364.0 3735.01   1
   1  -9  10 71471.2 3957.97  -2
   1   9 -11 71471.2 3957.97   1
   1  -9   9 45643.5 5564.36  -2
   1   9 -10 45643.5 5564.36   1
  -1   9  -8 45571.5 2670.48  -2
  -1  -9   9 45571.5 2670.48   1
  -1   9  -7 60661.3 4858.35  -2
  -1  -9   8 60661.3 4858.35   1
   1  -9   6 29985.2 2139.52  -2
   1   9  -7 29985.2 2139.52   1
   1  -9   5 62347.0 2811.76  -2
   1   9  -6 62347.0 2811.76   1
   1  -9   4 164357. 5841.91  -2
   1   9  -5 164357. 5841.91   1
   1   9   3 172395. 4086.25  -2
   1  -9  -4 172395. 4086.25   1
   1   9   2 220751. 3989.11  -2
   1  -9  -3 220751. 3989.11   1
   1   9   1 55069.2 2156.73  -2
   1  -9  -2 55069.2 2156.73   1
   1  -9   0 98199.7 4899.28  -2
   1   9  -1 98199.7 4899.28   1
   1  -9  -1 45551.1 2537.35  -2
   1   9   0 45551.1 2537.35   1
   1  -9  -2 88248.2 4172.83  -2
   1   9   1 88248.2 4172.83   1
   1   9  -3 101391. 3088.10  -2
   1  -9   2 101391. 3088.10   1
   1  -9  -4 343875. 6079.22  -2
   1   9   3 343875. 6079.22   1
  -1  -9   5 94180.4 3448.43  -2
  -1   9  -4 94180.4 3448.43   1
   1  -9  -6 92322.7 3650.59  -2
   1   9   5 92322.7 3650.59   1
   1  -9  -7 70770.9 3313.39  -2
   1   9   6 70770.9 3313.39   1
  -1  -9   8 30585.2 2408.75  -2
  -1   9  -7 30585.2 2408.75   1
  -1  -9   9 38346.5 2625.38  -2
  -1   9  -8 38346.5 2625.38   1
   1  -9 -10 75193.1 4227.63  -2
   1   9   9 75193.1 4227.63   1
  -1  -9  11 31984.6 2778.26  -2
  -1   9 -10 31984.6 2778.26   1
  -1  -9  12 105202. 25069.2  -2
  -1   9 -11 105202. 25069.2   1
  -1  -9  13 17194.8 2119.91  -2
  -1   9 -12 17194.8 2119.91   1
  -1  -9  14 65606.2 2399.84  -2
  -1   9 -13 65606.2 2399.84   1
  -1  -9  15 48045.8 2166.84  -2
  -1   9 -14 48045.8 2166.84   1
  -1  -9  16 144914. 3270.49  -2
  -1   9 -15 144914. 3270.49   1
  -1  -9  17 38227.0 1798.57  -2
  -1   9 -16 38227.0 1798.57   1
  -1  -9  18 43131.9 1859.16  -2
  -1   9 -17 43131.9 1859.16   1
  -1  -9  19 7791.39 962.492  -2
  -1   9 -18 7791.39 962.492   1
  -1  -9  20 22403.7 1182.52  -2
  -1   9 -19 22403.7 1182.52   1
  -1  -9  21 432.693 634.152  -2
  -1   9 -20 432.693 634.152   1
  -1  -9  22 1684.03 578.095  -2
  -1   9 -21 1684.03 578.095   1
   1 -10  21 17219.7 678.762  -2
   1  10 -22 17219.7 678.762   1
   1 -10  20 18879.5 836.755  -2
   1  10 -21 18879.5 836.755   1
   1 -10  19 25056.1 1118.33  -2
   1  10 -20 25056.1 1118.33   1
   1 -10  18 9762.14 1011.18  -2
   1  10 -19 9762.14 1011.18   1
   1 -10  17 36908.4 1633.85  -2
   1  10 -18 36908.4 1633.85   1
   1 -10  16 9737.85 1258.60  -2
   1  10 -17 9737.85 1258.60   1
   1 -10  15 50972.1 2057.24  -2
   1  10 -16 50972.1 2057.24   1
   1 -10  14 6591.89 1225.11  -2
   1  10 -15 6591.89 1225.11   1
   1 -10  13 48140.1 2165.46  -2
   1  10 -14 48140.1 2165.46   1
  -1  10 -12 18462.7 1760.56  -2
  -1 -10  13 18462.7 1760.56   1
   1 -10  11 19999.5 1665.35  -2
   1  10 -12 19999.5 1665.35   1
  -1  10 -10 21752.8 2259.27  -2
  -1 -10  11 21752.8 2259.27   1
  -1  10  -9 29976.5 10690.0  -2
  -1 -10  10 29976.5 10690.0   1
   1 -10   8 96821.2 5493.28  -2
   1  10  -9 96821.2 5493.28   1
   1 -10   7 53847.1 3337.97  -2
   1  10  -8 53847.1 3337.97   1
   1 -10   6 119374. 2193.45  -2
   1  10  -7 119374. 2193.45   1
  -1 -10  -5 109321. 4191.78  -2
  -1  10   6 109321. 4191.78   1
   1 -10   4 85586.8 1357.89  -2
   1  10  -5 85586.8 1357.89   1
   1 -10   3 28785.1 2347.51  -2
   1  10  -4 28785.1 2347.51   1
   1 -10   2 5927.17 1292.69  -2
   1  10  -3 5927.17 1292.69   1
  -1  10  -1 28011.0 5111.89  -2
  -1 -10   2 28011.0 5111.89   1
   1  10   0 13495.7 1386.54  -2
   1 -10  -1 13495.7 1386.54   1
   1 -10  -1 20193.1 2567.12  -2
   1  10   0 20193.1 2567.12   1
  -1 -10   2 35028.2 1982.27  -2
  -1  10  -1 35028.2 1982.27   1
  -1 -10   3 3464.20 1249.64  -2
  -1  10  -2 3464.20 1249.64   1
  -1 -10   4 27550.5 2144.78  -2
  -1  10  -3 27550.5 2144.78   1
  -1 -10   5 39537.1 2588.44  -2
  -1  10  -4 39537.1 2588.44   1
  -1 -10   6 131674. 5455.80  -2
  -1  10  -5 131674. 5455.80   1
   1 -10  -7 52454.0 2924.00  -2
   1  10   6 52454.0 2924.00   1
  -1 -10   8 116426. 4339.61  -2
  -1  10  -7 116426. 4339.61   1
  -1 -10   9 43704.7 3013.76  -2
  -1  10  -8 43704.7 3013.76   1
  -1 -10  10 95184.3 4077.60  -2
  -1  10  -9 95184.3 4077.60   1
  -1 -10  11 15997.1 2264.39  -2
  -1  10 -10 15997.1 2264.39   1
  -1 -10  12 20947.9 1636.20  -2
  -1  10 -11 20947.9 1636.20   1
  -1 -10  13 24616.3 1713.54  -2
  -1  10 -12 24616.3 1713.54   1
  -1 -10  14 25720.6 1713.51  -2
  -1  10 -13 25720.6 1713.51   1
  -1 -10  15 11224.2 1341.75  -2
  -1  10 -14 11224.2 1341.75   1
  -1 -10  16 25191.0 1731.80  -2
  -1  10 -15 25191.0 1731.80   1
  -1 -10  17 7621.35 1179.18  -2
  -1  10 -16 7621.35 1179.18   1
  -1 -10  18 25247.2 1443.53  -2
  -1  10 -17 25247.2 1443.53   1
  -1 -10  19 4667.13 887.793  -2
  -1  10 -18 4667.13 887.793   1
  -1 -10  20 38983.0 1358.09  -2
  -1  10 -19 38983.0 1358.09   1
  -1 -10  21 9389.88 760.845  -2
  -1  10 -20 9389.88 760.845   1
  -1 -10  22 36835.3 949.529  -2
  -1  10 -21 36835.3 949.529   1
   1 -11  20 10186.1 745.972  -2
   1  11 -21 10186.1 745.972   1
   1 -11  19 21618.2 1015.30  -2
   1  11 -20 21618.2 1015.30   1
   1 -11  18 9007.39 922.858  -2
   1  11 -19 9007.39 922.858   1
   1 -11  17 21643.2 1474.40  -2
   1  11 -18 21643.2 1474.40   1
   1 -11  16 16329.2 1307.88  -2
   1  11 -17 16329.2 1307.88   1
   1 -11  15 12361.0 1297.75  -2
   1  11 -16 12361.0 1297.75   1
   1 -11  14 28460.8 1675.55  -2
   1  11 -15 28460.8 1675.55   1
   1 -11  13 4585.00 1162.38  -2
   1  11 -14 4585.00 1162.38   1
   1 -11  12 9177.22 1768.55  -2
   1  11 -13 9177.22 1768.55   1
   1  11  11 15403.3 1517.27  -2
   1 -11 -12 15403.3 1517.27   1
   1 -11  10 6399.70 1352.30  -2
   1  11 -11 6399.70 1352.30   1
  -1  11  -9 49184.3 5668.09  -2
  -1 -11  10 49184.3 5668.09   1
  -1  11  -8 32706.2 2466.54  -2
  -1 -11   9 32706.2 2466.54   1
   1 -11   7 89525.4 4046.76  -2
   1  11  -8 89525.4 4046.76   1
   1 -11   6 41033.1 3328.03  -2
   1  11  -7 41033.1 3328.03   1
   1 -11   5 161245. 2373.68  -2
   1  11  -6 161245. 2373.68   1
   1 -11   4 51733.5 2913.69  -2
   1  11  -5 51733.5 2913.69   1
  -1  11  -3 70403.2 3511.97  -2
  -1 -11   4 70403.2 3511.97   1
   1 -11   2 46737.7 2516.28  -2
   1  11  -3 46737.7 2516.28   1
  -1 -11  -1 23536.8 1847.90  -2
  -1  11   2 23536.8 1847.90   1
  -1 -11   0 91180.1 4563.08  -2
  -1  11   1 91180.1 4563.08   1
   1 -11  -1 64150.5 3729.90  -2
   1  11   0 64150.5 3729.90   1
   1 -11  -2 27090.7 3296.03  -2
   1  11   1 27090.7 3296.03   1
   1  11  -3 76840.4 3068.50  -2
   1 -11   2 76840.4 3068.50   1
  -1 -11   4 28295.6 2027.94  -2
  -1  11  -3 28295.6 2027.94   1
   1  11  -5 93580.5 4603.10  -2
   1 -11   4 93580.5 4603.10   1
   1 -11  -6 84283.0 3970.16  -2
   1  11   5 84283.0 3970.16   1
   1  11  -7 69913.0 3547.48  -2
   1 -11   6 69913.0 3547.48   1
   1  11  -8 42810.2 3029.82  -2
   1 -11   7 42810.2 3029.82   1
  -1 -11   9 47599.6 3064.96  -2
  -1  11  -8 47599.6 3064.96   1
   1  11 -10 33552.4 6935.74  -2
   1 -11   9 33552.4 6935.74   1
  -1 -11  11 12390.7 1408.77  -2
  -1  11 -10 12390.7 1408.77   1
  -1 -11  12 29710.7 1951.19  -2
  -1  11 -11 29710.7 1951.19   1
  -1 -11  13 4342.45 1235.02  -2
  -1  11 -12 4342.45 1235.02   1
  -1 -11  14 7675.46 1283.21  -2
  -1  11 -13 7675.46 1283.21   1
  -1 -11  15 24733.7 1670.44  -2
  -1  11 -14 24733.7 1670.44   1
  -1 -11  16 22047.4 1522.73  -2
  -1  11 -15 22047.4 1522.73   1
  -1 -11  17 18784.3 1377.45  -2
  -1  11 -16 18784.3 1377.45   1
  -1 -11  18 9163.93 1074.74  -2
  -1  11 -17 9163.93 1074.74   1
  -1 -11  19 9592.16 951.558  -2
  -1  11 -18 9592.16 951.558   1
  -1 -11  20 9026.25 881.353  -2
  -1  11 -19 9026.25 881.353   1
  -1 -11  21 5767.16 594.329  -2
  -1  11 -20 5767.16 594.329   1
   1 -12  20 2285.64 439.092  -2
   1  12 -21 2285.64 439.092   1
   1 -12  19 3795.23 621.205  -2
   1  12 -20 3795.23 621.205   1
   1 -12  18 24186.2 1214.86  -2
   1  12 -19 24186.2 1214.86   1
   1 -12  17 18924.3 1186.40  -2
   1  12 -18 18924.3 1186.40   1
   1 -12  16 19279.2 1324.42  -2
   1  12 -17 19279.2 1324.42   1
   1 -12  15 58122.1 2351.78  -2
   1  12 -16 58122.1 2351.78   1
   1 -12  14 12420.1 1453.46  -2
   1  12 -15 12420.1 1453.46   1
   1 -12  13 24622.4 1646.40  -2
   1  12 -14 24622.4 1646.40   1
   1 -12  12 22355.7 1597.18  -2
   1  12 -13 22355.7 1597.18   1
   1 -12  11 27418.7 1830.69  -2
   1  12 -12 27418.7 1830.69   1
   1 -12  10 17417.9 1598.21  -2
   1  12 -11 17417.9 1598.21   1
   1 -12   9 11246.6 1429.95  -2
   1  12 -10 11246.6 1429.95   1
   1 -12   8 3080.99 1475.58  -2
   1  12  -9 3080.99 1475.58   1
   1 -12   7 907.231 1537.30  -2
   1  12  -8 907.231 1537.30   1
  -1 -12  -6 27212.2 2461.63  -2
  -1  12   7 27212.2 2461.63   1
  -1 -12  -5 2493.10 1253.46  -2
  -1  12   6 2493.10 1253.46   1
   1 -12   4 21453.3 1919.24  -2
   1  12  -5 21453.3 1919.24   1
   1 -12   3 35566.0 2507.70  -2
   1  12  -4 35566.0 2507.70   1
  -1 -12  -2 1307.38 1372.21  -2
  -1  12   3 1307.38 1372.21   1
   1 -12   1 53205.2 3928.69  -2
   1  12  -2 53205.2 3928.69   1
  -1 -12   0 26292.1 2778.93  -2
  -1  12   1 26292.1 2778.93   1
  -1 -12   1 31442.4 3108.54  -2
  -1  12   0 31442.4 3108.54   1
   1 -12  -2 41984.1 7732.21  -2
   1  12   1 41984.1 7732.21   1
   1 -12  -3 946.958 1635.37  -2
   1  12   2 946.958 1635.37   1
   1 -12  -4 25700.4 4254.89  -2
   1  12   3 25700.4 4254.89   1
  -1 -12   5 24102.9 2214.93  -2
  -1  12  -4 24102.9 2214.93   1
  -1 -12   6 270.930 589.933  -2
  -1  12  -5 270.930 589.933   1
   1  12  -7 24981.3 2318.66  -2
   1 -12   6 24981.3 2318.66   1
  -1 -12   8 672.835 1398.65  -2
  -1  12  -7 672.835 1398.65   1
   1 -12  -9 6424.63 1786.27  -2
   1  12   8 6424.63 1786.27   1
  -1 -12  10 5666.95 1318.37  -2
  -1  12  -9 5666.95 1318.37   1
  -1 -12  11 8437.03 1343.03  -2
  -1  12 -10 8437.03 1343.03   1
   1  12 -12 15954.9 1625.12  -2
   1 -12  11 15954.9 1625.12   1
  -1 -12  13 17777.8 1520.00  -2
  -1  12 -12 17777.8 1520.00   1
  -1 -12  14 14160.1 1479.01  -2
  -1  12 -13 14160.1 1479.01   1
  -1 -12  15 13629.4 1382.21  -2
  -1  12 -14 13629.4 1382.21   1
  -1 -12  16 33734.4 1695.53  -2
  -1  12 -15 33734.4 1695.53   1
  -1 -12  17 17590.2 1331.74  -2
  -1  12 -16 17590.2 1331.74   1
  -1 -12  18 10436.8 1023.85  -2
  -1  12 -17 10436.8 1023.85   1
  -1 -12  19 22139.8 1242.14  -2
  -1  12 -18 22139.8 1242.14   1
  -1 -12  20 2011.20 598.496  -2
  -1  12 -19 2011.20 598.496   1
  -1 -12  21 4152.66 491.135  -2
  -1  12 -20 4152.66 491.135   1
   1 -13  19 18796.4 1023.61  -2
   1  13 -20 18796.4 1023.61   1
   1 -13  18 4853.36 743.765  -2
   1  13 -19 4853.36 743.765   1
   1 -13  17 42838.1 1628.38  -2
   1  13 -18 42838.1 1628.38   1
   1 -13  16 3192.93 901.340  -2
   1  13 -17 3192.93 901.340   1
   1 -13  15 42904.1 2111.12  -2
   1  13 -16 42904.1 2111.12   1
   1 -13  14 4602.29 1135.84  -2
   1  13 -15 4602.29 1135.84   1
   1  13  13 20014.7 1549.99  -2
   1 -13 -14 20014.7 1549.99   1
   1 -13  12 10561.8 1313.20  -2
   1  13 -13 10561.8 1313.20   1
   1 -13  11 2797.49 1123.91  -2
   1  13 -12 2797.49 1123.91   1
   1 -13  10 52004.9 2186.47  -2
   1  13 -11 52004.9 2186.47   1
   1  13   9 3419.31 1172.72  -2
   1 -13 -10 3419.31 1172.72   1
   1 -13   8 82231.2 3386.77  -2
   1  13  -9 82231.2 3386.77   1
   1 -13   7 23635.9 2347.66  -2
   1  13  -8 23635.9 2347.66   1
   1 -13   6 57272.6 6126.46  -2
   1  13  -7 57272.6 6126.46   1
  -1  13  -5 125100. 5014.43  -2
  -1 -13   6 125100. 5014.43   1
  -1  13  -4 626.577 717.651  -2
  -1 -13   5 626.577 717.651   1
   1 -13   3 243771. 7062.28  -2
   1  13  -4 243771. 7062.28   1
   1 -13   2 908.301 1698.16  -2
   1  13  -3 908.301 1698.16   1
  -1 -13  -1 111269. 19232.3  -2
  -1  13   2 111269. 19232.3   1
  -1 -13   0 727.043 1736.99  -2
  -1  13   1 727.043 1736.99   1
   1 -13  -1 1179.61 1765.66  -2
   1  13   0 1179.61 1765.66   1
   1 -13  -2 85973.0 4543.55  -2
   1  13   1 85973.0 4543.55   1
  -1 -13   3 1377.34 1826.72  -2
  -1  13  -2 1377.34 1826.72   1
   1 -13  -4 189847. 16593.5  -2
   1  13   3 189847. 16593.5   1
  -1 -13   5 4270.86 1931.93  -2
  -1  13  -4 4270.86 1931.93   1
  -1 -13   6 123845. 4931.32  -2
  -1  13  -5 123845. 4931.32   1
   1 -13  -7 40224.1 4120.67  -2
   1  13   6 40224.1 4120.67   1
  -1 -13   8 16237.6 3437.55  -2
  -1  13  -7 16237.6 3437.55   1
  -1 -13   9 72909.1 3895.38  -2
  -1  13  -8 72909.1 3895.38   1
  -1 -13  10 1788.68 1188.21  -2
  -1  13  -9 1788.68 1188.21   1
  -1  13  11 48268.6 2058.17  -2
  -1 -13 -10 48268.6 2058.17   1
  -1 -13  12 6354.70 1134.17  -2
  -1  13 -11 6354.70 1134.17   1
  -1 -13  13 6119.91 1190.44  -2
  -1  13 -12 6119.91 1190.44   1
  -1 -13  14 21238.2 1604.67  -2
  -1  13 -13 21238.2 1604.67   1
  -1 -13  15 2866.91 1075.10  -2
  -1  13 -14 2866.91 1075.10   1
  -1 -13  16 32718.2 1993.51  -2
  -1  13 -15 32718.2 1993.51   1
  -1 -13  17 2542.68 924.226  -2
  -1  13 -16 2542.68 924.226   1
  -1 -13  18 36345.6 1688.49  -2
  -1  13 -17 36345.6 1688.49   1
  -1 -13  19 2951.95 713.579  -2
  -1  13 -18 2951.95 713.579   1
  -1 -13  20 13619.3 763.441  -2
  -1  13 -19 13619.3 763.441   1
   1 -14  19 6979.44 568.113  -2
   1  14 -20 6979.44 568.113   1
   1 -14  18 37727.5 1198.32  -2
   1  14 -19 37727.5 1198.32   1
   1 -14  17 394.645 555.031  -2
   1  14 -18 394.645 555.031   1
   1 -14  16 29221.4 1402.45  -2
   1  14 -17 29221.4 1402.45   1
   1 -14  15 6612.98 1036.69  -2
   1  14 -16 6612.98 1036.69   1
   1 -14  14 17643.4 1428.27  -2
   1  14 -15 17643.4 1428.27   1
   1 -14  13 20692.6 1486.60  -2
   1  14 -14 20692.6 1486.60   1
   1 -14  12 4023.21 1163.10  -2
   1  14 -13 4023.21 1163.10   1
   1 -14  11 24312.1 1688.41  -2
   1  14 -12 24312.1 1688.41   1
   1 -14  10 19835.4 1584.19  -2
   1  14 -11 19835.4 1584.19   1
   1  14   9 33933.5 2320.22  -2
   1 -14 -10 33933.5 2320.22   1
   1  14   8 69564.5 2448.51  -2
   1 -14  -9 69564.5 2448.51   1
   1 -14   7 54618.7 2727.39  -2
   1  14  -8 54618.7 2727.39   1
   1 -14   6 123073. 4372.65  -2
   1  14  -7 123073. 4372.65   1
   1 -14   5 72029.0 24689.6  -2
   1  14  -6 72029.0 24689.6   1
  -1 -14  -4 109627. 19983.1  -2
  -1  14   5 109627. 19983.1   1
   1 -14   3 40461.3 9917.85  -2
   1  14  -4 40461.3 9917.85   1
   1 -14   2 29989.9 3053.75  -2
   1  14  -3 29989.9 3053.75   1
  -1 -14  -1 3327.74 1873.25  -2
  -1  14   2 3327.74 1873.25   1
  -1 -14   0 6424.03 2161.00  -2
  -1  14   1 6424.03 2161.00   1
   1 -14  -1 1236.63 2248.38  -2
   1  14   0 1236.63 2248.38   1
   1 -14  -2 6254.79 2301.12  -2
   1  14   1 6254.79 2301.12   1
   1 -14  -3 25891.3 3011.16  -2
   1  14   2 25891.3 3011.16   1
   1 -14  -4 15825.4 2649.04  -2
   1  14   3 15825.4 2649.04   1
  -1 -14   5 105522. 12879.6  -2
  -1  14  -4 105522. 12879.6   1
  -1  14   7 150827. 3333.95  -2
  -1 -14  -6 150827. 3333.95   1
  -1 -14   8 63086.9 2734.12  -2
  -1  14  -7 63086.9 2734.12   1
  -1  14   9 85975.0 2646.26  -2
  -1 -14  -8 85975.0 2646.26   1
  -1 -14  10 37679.3 2568.06  -2
  -1  14  -9 37679.3 2568.06   1
  -1  14  11 31934.7 1950.84  -2
  -1 -14 -10 31934.7 1950.84   1
  -1 -14  12 21002.0 1597.50  -2
  -1  14 -11 21002.0 1597.50   1
  -1  14  13 6089.73 1117.25  -2
  -1 -14 -12 6089.73 1117.25   1
  -1 -14  14 13364.9 1378.93  -2
  -1  14 -13 13364.9 1378.93   1
  -1 -14  15 7980.88 1190.53  -2
  -1  14 -14 7980.88 1190.53   1
  -1 -14  16 5702.20 1066.66  -2
  -1  14 -15 5702.20 1066.66   1
  -1 -14  17 25106.7 1368.50  -2
  -1  14 -16 25106.7 1368.50   1
  -1 -14  18 628.202 716.176  -2
  -1  14 -17 628.202 716.176   1
  -1 -14  19 45217.0 1334.15  -2
  -1  14 -18 45217.0 1334.15   1
  -1 -14  20 7613.07 639.643  -2
  -1  14 -19 7613.07 639.643   1
   1 -15  18 6644.05 1339.27  -2
   1  15 -19 6644.05 1339.27   1
   1 -15  17 25457.1 1119.16  -2
   1  15 -18 25457.1 1119.16   1
   1 -15  16 20407.0 1189.91  -2
   1  15 -17 20407.0 1189.91   1
   1 -15  15 59585.7 1882.11  -2
   1  15 -16 59585.7 1882.11   1
   1 -15  14 32260.7 1579.45  -2
   1  15 -15 32260.7 1579.45   1
   1  15  13 84447.1 2415.55  -2
   1 -15 -14 84447.1 2415.55   1
   1 -15  12 42197.2 1968.05  -2
   1  15 -13 42197.2 1968.05   1
   1 -15  11 68066.1 2421.60  -2
   1  15 -12 68066.1 2421.60   1
   1  15  10 24229.6 1688.69  -2
   1 -15 -11 24229.6 1688.69   1
   1 -15   9 18090.3 1575.46  -2
   1  15 -10 18090.3 1575.46   1
   1  15   8 15628.5 1490.44  -2
   1 -15  -9 15628.5 1490.44   1
   1  15   7 5188.42 1102.42  -2
   1 -15  -8 5188.42 1102.42   1
   1 -15   6 6363.76 1429.51  -2
   1  15  -7 6363.76 1429.51   1
   1 -15   5 54012.7 3608.01  -2
   1  15  -6 54012.7 3608.01   1
   1 -15   4 13282.4 1877.79  -2
   1  15  -5 13282.4 1877.79   1
   1 -15   3 82403.8 12102.3  -2
   1  15  -4 82403.8 12102.3   1
   1 -15   2 25551.9 3125.59  -2
   1  15  -3 25551.9 3125.59   1
  -1 -15  -1 152101. 22761.7  -2
  -1  15   2 152101. 22761.7   1
  -1 -15   0 112275. 5559.65  -2
  -1  15   1 112275. 5559.65   1
  -1 -15   1 156637. 48006.1  -2
  -1  15   0 156637. 48006.1   1
   1 -15  -2 101675. 19190.9  -2
   1  15   1 101675. 19190.9   1
   1 -15  -3 48672.7 15272.7  -2
   1  15   2 48672.7 15272.7   1
   1 -15  -4 86210.9 4813.39  -2
   1  15   3 86210.9 4813.39   1
  -1  15   5 23056.2 2235.25  -2
  -1 -15  -4 23056.2 2235.25   1
  -1 -15   6 64054.7 2441.04  -2
  -1  15  -5 64054.7 2441.04   1
  -1 -15   7 5106.21 1254.75  -2
  -1  15  -6 5106.21 1254.75   1
  -1  15   8 10173.9 1461.35  -2
  -1 -15  -7 10173.9 1461.35   1
  -1 -15   9 14436.6 1415.95  -2
  -1  15  -8 14436.6 1415.95   1
  -1  15  10 10892.7 1367.78  -2
  -1 -15  -9 10892.7 1367.78   1
  -1 -15  11 28000.3 1716.66  -2
  -1  15 -10 28000.3 1716.66   1
  -1 -15  12 56865.1 2597.53  -2
  -1  15 -11 56865.1 2597.53   1
  -1 -15  13 62786.6 2271.38  -2
  -1  15 -12 62786.6 2271.38   1
  -1 -15  14 60644.6 2273.13  -2
  -1  15 -13 60644.6 2273.13   1
  -1 -15  15 53160.3 2002.27  -2
  -1  15 -14 53160.3 2002.27   1
  -1 -15  16 36692.6 1646.13  -2
  -1  15 -15 36692.6 1646.13   1
  -1 -15  17 41911.2 1530.57  -2
  -1  15 -16 41911.2 1530.57   1
  -1 -15  18 26541.3 1150.90  -2
  -1  15 -17 26541.3 1150.90   1
  -1 -15  19 13463.5 816.475  -2
  -1  15 -18 13463.5 816.475   1
   1 -16  17 12224.3 797.797  -2
   1  16 -18 12224.3 797.797   1
   1 -16  16 5965.85 807.331  -2
   1  16 -17 5965.85 807.331   1
   1 -16  15 11298.4 1039.49  -2
   1  16 -16 11298.4 1039.49   1
   1  16  14 1501.03 859.471  -2
   1 -16 -15 1501.03 859.471   1
   1  16  13 2678.11 976.489  -2
   1 -16 -14 2678.11 976.489   1
   1 -16  12 21405.0 1556.01  -2
   1  16 -13 21405.0 1556.01   1
   1 -16  11 23039.9 1583.88  -2
   1  16 -12 23039.9 1583.88   1
   1 -16  10 91912.4 2769.75  -2
   1  16 -11 91912.4 2769.75   1
   1 -16   9 60052.7 2314.01  -2
   1  16 -10 60052.7 2314.01   1
   1 -16   8 77352.0 2582.78  -2
   1  16  -9 77352.0 2582.78   1
   1 -16   7 65894.9 2288.47  -2
   1  16  -8 65894.9 2288.47   1
   1  16   6 62325.5 2247.72  -2
   1 -16  -7 62325.5 2247.72   1
   1 -16   5 96930.7 3090.85  -2
   1  16  -6 96930.7 3090.85   1
  -1 -16  -4 36060.2 2478.67  -2
  -1  16   5 36060.2 2478.67   1
  -1 -16  -3 71607.4 3333.38  -2
  -1  16   4 71607.4 3333.38   1
   1  16   2 18695.6 1746.43  -2
   1 -16  -3 18695.6 1746.43   1
   1  16   1 76405.1 5252.24  -2
   1 -16  -2 76405.1 5252.24   1
  -1  16   0 2805.60 1321.90  -2
  -1 -16   1 2805.60 1321.90   1
   1 -16  -1 1664.34 1550.02  -2
   1  16   0 1664.34 1550.02   1
  -1 -16   2 49158.4 2614.95  -2
  -1  16  -1 49158.4 2614.95   1
   1 -16  -3 32319.0 2355.14  -2
   1  16   2 32319.0 2355.14   1
  -1  16   4 40913.4 3143.82  -2
  -1 -16  -3 40913.4 3143.82   1
  -1  16   5 60043.3 3827.51  -2
  -1 -16  -4 60043.3 3827.51   1
  -1 -16   6 58949.2 2900.45  -2
  -1  16  -5 58949.2 2900.45   1
  -1  16   7 106760. 2846.63  -2
  -1 -16  -6 106760. 2846.63   1
  -1 -16   8 41292.2 2281.59  -2
  -1  16  -7 41292.2 2281.59   1
  -1  16   9 124222. 3152.78  -2
  -1 -16  -8 124222. 3152.78   1
  -1 -16  10 35856.3 1898.28  -2
  -1  16  -9 35856.3 1898.28   1
  -1  16  11 152031. 3268.76  -2
  -1 -16 -10 152031. 3268.76   1
  -1  16  12 10788.1 1403.05  -2
  -1 -16 -11 10788.1 1403.05   1
  -1  16  13 39560.8 1806.31  -2
  -1 -16 -12 39560.8 1806.31   1
  -1  16  14 2694.50 959.185  -2
  -1 -16 -13 2694.50 959.185   1
  -1 -16  15 1057.19 870.185  -2
  -1  16 -14 1057.19 870.185   1
  -1 -16  16 5474.82 918.235  -2
  -1  16 -15 5474.82 918.235   1
  -1 -16  17 13110.3 951.288  -2
  -1  16 -16 13110.3 951.288   1
  -1 -16  18 5754.74 694.290  -2
  -1  16 -17 5754.74 694.290   1
   1 -17  16 13482.1 856.969  -2
   1  17 -17 13482.1 856.969   1
   1 -17  15 26937.3 1200.01  -2
   1  17 -16 26937.3 1200.01   1
   1 -17  14 25930.7 1317.48  -2
   1  17 -15 25930.7 1317.48   1
   1 -17  13 68887.1 2021.74  -2
   1  17 -14 68887.1 2021.74   1
   1 -17  12 27334.0 1484.24  -2
   1  17 -13 27334.0 1484.24   1
   1 -17  11 73434.1 2265.71  -2
   1  17 -12 73434.1 2265.71   1
   1 -17  10 18443.4 1485.55  -2
   1  17 -11 18443.4 1485.55   1
   1  17   9 14207.6 1397.60  -2
   1 -17 -10 14207.6 1397.60   1
   1 -17   8 13718.3 1394.24  -2
   1  17  -9 13718.3 1394.24   1
   1 -17   7 4005.43 1048.49  -2
   1  17  -8 4005.43 1048.49   1
   1 -17   6 9755.85 1126.83  -2
   1  17  -7 9755.85 1126.83   1
   1 -17   5 9812.08 1174.71  -2
   1  17  -6 9812.08 1174.71   1
   1 -17   4 10909.1 1491.88  -2
   1  17  -5 10909.1 1491.88   1
   1  17   3 15830.2 1327.01  -2
   1 -17  -4 15830.2 1327.01   1
   1 -17   2 35358.9 3281.60  -2
   1  17  -3 35358.9 3281.60   1
  -1  17  -1 113165. 4848.05  -2
  -1 -17   2 113165. 4848.05   1
   1 -17   0 73898.1 2664.93  -2
   1  17  -1 73898.1 2664.93   1
   1 -17  -1 161708. 5046.51  -2
   1  17   0 161708. 5046.51   1
   1 -17  -2 53937.4 2774.70  -2
   1  17   1 53937.4 2774.70   1
  -1 -17   3 84604.1 5753.23  -2
  -1  17  -2 84604.1 5753.23   1
  -1  17   4 9737.91 1452.08  -2
  -1 -17  -3 9737.91 1452.08   1
  -1  17   5 20626.6 1634.05  -2
  -1 -17  -4 20626.6 1634.05   1
  -1 -17   6 4917.83 1190.45  -2
  -1  17  -5 4917.83 1190.45   1
  -1  17   7 8426.23 1223.64  -2
  -1 -17  -6 8426.23 1223.64   1
  -1  17   8 6793.83 1213.88  -2
  -1 -17  -7 6793.83 1213.88   1
  -1 -17   9 6711.12 1219.55  -2
  -1  17  -8 6711.12 1219.55   1
  -1 -17  10 12380.1 1326.27  -2
  -1  17  -9 12380.1 1326.27   1
  -1  17  11 29577.5 2054.50  -2
  -1 -17 -10 29577.5 2054.50   1
  -1  17  12 41183.8 1827.85  -2
  -1 -17 -11 41183.8 1827.85   1
  -1  17  13 61492.5 2114.56  -2
  -1 -17 -12 61492.5 2114.56   1
  -1 -17  14 37745.8 1581.17  -2
  -1  17 -13 37745.8 1581.17   1
  -1 -17  15 59103.0 1685.34  -2
  -1  17 -14 59103.0 1685.34   1
  -1 -17  16 14917.1 1036.66  -2
  -1  17 -15 14917.1 1036.66   1
  -1 -17  17 25137.3 1054.92  -2
  -1  17 -16 25137.3 1054.92   1
  -1 -17  18 3041.74 463.485  -2
  -1  17 -17 3041.74 463.485   1
   1 -18  16 11531.4 673.711  -2
   1  18 -17 11531.4 673.711   1
   1 -18  15 4787.33 689.701  -2
   1  18 -16 4787.33 689.701   1
   1  18  14 7417.23 824.896  -2
   1 -18 -15 7417.23 824.896   1
   1 -18  13 3481.20 820.298  -2
   1  18 -14 3481.20 820.298   1
   1  18  12 31959.2 1539.50  -2
   1 -18 -13 31959.2 1539.50   1
   1 -18  11 8164.44 1079.42  -2
   1  18 -12 8164.44 1079.42   1
   1 -18  10 46850.6 1893.21  -2
   1  18 -11 46850.6 1893.21   1
   1 -18   9 19751.6 1438.97  -2
   1  18 -10 19751.6 1438.97   1
   1 -18   8 29277.5 1611.66  -2
   1  18  -9 29277.5 1611.66   1
   1 -18   7 35774.7 1730.36  -2
   1  18  -8 35774.7 1730.36   1
   1  18   6 25253.7 1448.67  -2
   1 -18  -7 25253.7 1448.67   1
   1 -18   5 40681.9 4221.82  -2
   1  18  -6 40681.9 4221.82   1
   1  18   4 18975.8 2716.62  -2
   1 -18  -5 18975.8 2716.62   1
   1 -18   3 23262.3 1529.39  -2
   1  18  -4 23262.3 1529.39   1
   1  18   2 42192.5 1820.37  -2
   1 -18  -3 42192.5 1820.37   1
  -1  18  -1 78895.4 2258.19  -2
  -1 -18   2 78895.4 2258.19   1
   1  18   0 50875.0 1956.18  -2
   1 -18  -1 50875.0 1956.18   1
   1  18  -1 25160.7 1557.24  -2
   1 -18   0 25160.7 1557.24   1
  -1  18   2 82186.1 2608.18  -2
  -1 -18  -1 82186.1 2608.18   1
  -1  18   3 35643.6 2676.58  -2
  -1 -18  -2 35643.6 2676.58   1
  -1  18   4 19678.3 1622.19  -2
  -1 -18  -3 19678.3 1622.19   1
  -1  18   5 30462.4 1854.76  -2
  -1 -18  -4 30462.4 1854.76   1
  -1  18   6 25381.4 1724.46  -2
  -1 -18  -5 25381.4 1724.46   1
  -1 -18   7 55983.8 2438.94  -2
  -1  18  -6 55983.8 2438.94   1
  -1  18   8 23506.1 1543.63  -2
  -1 -18  -7 23506.1 1543.63   1
  -1 -18   9 41335.5 1883.00  -2
  -1  18  -8 41335.5 1883.00   1
  -1  18  10 16577.4 1708.90  -2
  -1 -18  -9 16577.4 1708.90   1
  -1  18  11 52891.8 1966.48  -2
  -1 -18 -10 52891.8 1966.48   1
  -1 -18  12 7508.35 1052.85  -2
  -1  18 -11 7508.35 1052.85   1
  -1 -18  13 22625.2 1354.65  -2
  -1  18 -12 22625.2 1354.65   1
  -1  18  14 3972.20 782.841  -2
  -1 -18 -13 3972.20 782.841   1
  -1 -18  15 3511.66 875.116  -2
  -1  18 -14 3511.66 875.116   1
  -1 -18  16 6727.74 736.186  -2
  -1  18 -15 6727.74 736.186   1
  -1 -18  17 7789.81 678.046  -2
  -1  18 -16 7789.81 678.046   1
   1 -19  15 6568.71 579.578  -2
   1  19 -16 6568.71 579.578   1
   1 -19  14 3678.69 749.499  -2
   1  19 -15 3678.69 749.499   1
   1 -19  13 4706.11 769.053  -2
   1  19 -14 4706.11 769.053   1
   1 -19  12 10256.5 933.225  -2
   1  19 -13 10256.5 933.225   1
   1  19  11 5490.62 905.877  -2
   1 -19 -12 5490.62 905.877   1
   1 -19  10 19869.0 1302.18  -2
   1  19 -11 19869.0 1302.18   1
   1 -19   9 5753.48 1016.35  -2
   1  19 -10 5753.48 1016.35   1
   1  19   8 29972.9 1570.59  -2
   1 -19  -9 29972.9 1570.59   1
   1 -19   7 6812.13 1005.77  -2
   1  19  -8 6812.13 1005.77   1
   1 -19   6 19161.3 1477.62  -2
   1  19  -7 19161.3 1477.62   1
   1  19   5 6368.69 1033.36  -2
   1 -19  -6 6368.69 1033.36   1
   1  19   4 15521.3 1292.65  -2
   1 -19  -5 15521.3 1292.65   1
   1 -19   3 8454.53 1430.15  -2
   1  19  -4 8454.53 1430.15   1
   1 -19   2 9398.92 1119.34  -2
   1  19  -3 9398.92 1119.34   1
   1 -19   1 7142.19 1057.79  -2
   1  19  -2 7142.19 1057.79   1
   1  19   0 6549.36 1088.76  -2
   1 -19  -1 6549.36 1088.76   1
  -1  19   1 12551.3 1263.71  -2
  -1 -19   0 12551.3 1263.71   1
  -1  19   2 4933.59 992.459  -2
  -1 -19  -1 4933.59 992.459   1
  -1  19   3 3496.41 1238.66  -2
  -1 -19  -2 3496.41 1238.66   1
  -1  19   4 7976.22 1286.99  -2
  -1 -19  -3 7976.22 1286.99   1
  -1  19   5 8423.88 1223.35  -2
  -1 -19  -4 8423.88 1223.35   1
  -1  19   6 11677.6 1322.84  -2
  -1 -19  -5 11677.6 1322.84   1
  -1  19   7 10462.1 1299.69  -2
  -1 -19  -6 10462.1 1299.69   1
  -1  19   8 11964.1 1264.67  -2
  -1 -19  -7 11964.1 1264.67   1
  -1  19   9 16791.1 1383.45  -2
  -1 -19  -8 16791.1 1383.45   1
  -1  19  10 11573.9 1201.17  -2
  -1 -19  -9 11573.9 1201.17   1
  -1  19  11 11392.8 1318.26  -2
  -1 -19 -10 11392.8 1318.26   1
  -1  19  12 11338.7 1067.04  -2
  -1 -19 -11 11338.7 1067.04   1
  -1  19  13 8299.30 888.699  -2
  -1 -19 -12 8299.30 888.699   1
  -1  19  14 4426.94 686.377  -2
  -1 -19 -13 4426.94 686.377   1
  -1 -19  15 6787.44 701.563  -2
  -1  19 -14 6787.44 701.563   1
  -1 -19  16 3359.37 533.514  -2
  -1  19 -15 3359.37 533.514   1
   1 -20  13 7107.91 664.111  -2
   1  20 -14 7107.91 664.111   1
   1  20  12 24139.2 1040.76  -2
   1 -20 -13 24139.2 1040.76   1
   1 -20  11 4437.24 756.521  -2
   1  20 -12 4437.24 756.521   1
   1 -20  10 31283.4 1344.23  -2
   1  20 -11 31283.4 1344.23   1
   1 -20   9 4568.85 882.946  -2
   1  20 -10 4568.85 882.946   1
   1 -20   8 9519.66 1043.89  -2
   1  20  -9 9519.66 1043.89   1
   1 -20   7 2715.45 927.863  -2
   1  20  -8 2715.45 927.863   1
   1  20   6 2526.57 865.232  -2
   1 -20  -7 2526.57 865.232   1
   1  20   5 3748.99 886.969  -2
   1 -20  -6 3748.99 886.969   1
   1  20   4 5347.68 959.633  -2
   1 -20  -5 5347.68 959.633   1
   1 -20   3 17058.3 1306.38  -2
   1  20  -4 17058.3 1306.38   1
   1  20   2 22061.5 1433.85  -2
   1 -20  -3 22061.5 1433.85   1
  -1  20  -1 23163.1 1362.21  -2
  -1 -20   2 23163.1 1362.21   1
   1 -20   0 33318.0 1591.78  -2
   1  20  -1 33318.0 1591.78   1
   1  20  -1 18324.9 1323.69  -2
   1 -20   0 18324.9 1323.69   1
  -1  20   2 49480.6 2091.00  -2
  -1 -20  -1 49480.6 2091.00   1
  -1  20   3 11247.6 1128.78  -2
  -1 -20  -2 11247.6 1128.78   1
  -1  20   4 24648.4 1594.49  -2
  -1 -20  -3 24648.4 1594.49   1
  -1  20   5 2768.21 1020.54  -2
  -1 -20  -4 2768.21 1020.54   1
  -1  20   6 8011.52 1184.82  -2
  -1 -20  -5 8011.52 1184.82   1
  -1  20   7 864.608 984.141  -2
  -1 -20  -6 864.608 984.141   1
  -1  20   8 1776.33 931.774  -2
  -1 -20  -7 1776.33 931.774   1
  -1  20   9 12167.8 1132.25  -2
  -1 -20  -8 12167.8 1132.25   1
  -1 -20  10 8760.01 1016.96  -2
  -1  20  -9 8760.01 1016.96   1
  -1 -20  11 19378.4 1176.48  -2
  -1  20 -10 19378.4 1176.48   1
  -1 -20  12 7750.09 829.725  -2
  -1  20 -11 7750.09 829.725   1
  -1  20  13 10776.1 800.608  -2
  -1 -20 -12 10776.1 800.608   1
  -1  20  14 7724.05 661.776  -2
  -1 -20 -13 7724.05 661.776   1
  -1 -20  15 6272.68 341.713  -2
  -1  20 -14 6272.68 341.713   1
   1  21  12 4359.27 510.683  -2
   1 -21 -13 4359.27 510.683   1
   1  21  11 35922.2 1145.97  -2
   1 -21 -12 35922.2 1145.97   1
   1 -21  10 1753.05 620.350  -2
   1  21 -11 1753.05 620.350   1
   1  21   9 11195.2 879.620  -2
   1 -21 -10 11195.2 879.620   1
   1  21   8 17269.6 1185.04  -2
   1 -21  -9 17269.6 1185.04   1
   1  21   7 8439.91 1122.41  -2
   1 -21  -8 8439.91 1122.41   1
   1  21   6 16659.3 1373.44  -2
   1 -21  -7 16659.3 1373.44   1
   1  21   5 6221.00 1256.87  -2
   1 -21  -6 6221.00 1256.87   1
   1  21   4 20823.4 1274.59  -2
   1 -21  -5 20823.4 1274.59   1
   1  21   3 2510.69 846.970  -2
   1 -21  -4 2510.69 846.970   1
   1  21   2 16450.5 1243.52  -2
   1 -21  -3 16450.5 1243.52   1
  -1  21  -1 17297.2 1194.00  -2
  -1 -21   2 17297.2 1194.00   1
   1  21   0 25508.4 1371.67  -2
   1 -21  -1 25508.4 1371.67   1
   1  21  -1 37290.5 1622.96  -2
   1 -21   0 37290.5 1622.96   1
  -1 -21   2 9815.42 1045.18  -2
  -1  21  -1 9815.42 1045.18   1
  -1  21   3 22766.9 1417.69  -2
  -1 -21  -2 22766.9 1417.69   1
  -1  21   4 1625.36 901.120  -2
  -1 -21  -3 1625.36 901.120   1
  -1  21   5 18838.6 1372.66  -2
  -1 -21  -4 18838.6 1372.66   1
  -1  21   6 7600.62 1089.19  -2
  -1 -21  -5 7600.62 1089.19   1
  -1 -21   7 12077.5 1104.62  -2
  -1  21  -6 12077.5 1104.62   1
  -1  21   8 7532.73 1032.88  -2
  -1 -21  -7 7532.73 1032.88   1
  -1  21   9 12054.1 1251.80  -2
  -1 -21  -8 12054.1 1251.80   1
  -1  21  10 6629.76 778.275  -2
  -1 -21  -9 6629.76 778.275   1
  -1 -21  11 1633.78 645.743  -2
  -1  21 -10 1633.78 645.743   1
  -1 -21  12 26798.1 1071.40  -2
  -1  21 -11 26798.1 1071.40   1
  -1  21  13 10076.0 592.689  -2
  -1 -21 -12 10076.0 592.689   1
   1  22  11 5341.61 512.600  -2
   1 -22 -12 5341.61 512.600   1
   1  22  10 32054.6 1045.10  -2
   1 -22 -11 32054.6 1045.10   1
   1  22   9 17180.5 957.186  -2
   1 -22 -10 17180.5 957.186   1
   1  22   8 43550.6 1926.36  -2
   1 -22  -9 43550.6 1926.36   1
   1  22   7 14509.5 1085.96  -2
   1 -22  -8 14509.5 1085.96   1
   1  22   6 27006.3 1371.48  -2
   1 -22  -7 27006.3 1371.48   1
   1 -22   5 15926.6 1301.20  -2
   1  22  -6 15926.6 1301.20   1
   1 -22   4 12040.5 996.611  -2
   1  22  -5 12040.5 996.611   1
   1 -22   3 41726.2 1568.54  -2
   1  22  -4 41726.2 1568.54   1
   1 -22   2 1519.14 776.957  -2
   1  22  -3 1519.14 776.957   1
  -1 -22  -1 39995.3 1598.33  -2
  -1  22   2 39995.3 1598.33   1
  -1  22   0 3863.44 834.784  -2
  -1 -22   1 3863.44 834.784   1
  -1 -22   1 4277.90 809.334  -2
  -1  22   0 4277.90 809.334   1
   1 -22  -2 38253.3 1698.29  -2
   1  22   1 38253.3 1698.29   1
   1 -22  -3 2105.41 844.327  -2
   1  22   2 2105.41 844.327   1
  -1  22   4 42836.9 1631.21  -2
  -1 -22  -3 42836.9 1631.21   1
  -1  22   5 15018.6 1151.62  -2
  -1 -22  -4 15018.6 1151.62   1
  -1  22   6 18409.5 1201.98  -2
  -1 -22  -5 18409.5 1201.98   1
  -1  22   7 28759.1 1355.49  -2
  -1 -22  -6 28759.1 1355.49   1
  -1 -22   8 19514.9 1156.70  -2
  -1  22  -7 19514.9 1156.70   1
  -1  22   9 40714.9 1409.16  -2
  -1 -22  -8 40714.9 1409.16   1
   1 -22 -10 20485.1 1037.70  -2
   1  22   9 20485.1 1037.70   1
  -1  22  11 33786.7 1053.11  -2
  -1 -22 -10 33786.7 1053.11   1
  -1  22  12 4795.52 522.212  -2
  -1 -22 -11 4795.52 522.212   1
   1  23   9 15100.3 736.364  -2
   1 -23 -10 15100.3 736.364   1
   1  23   8 3660.11 619.789  -2
   1 -23  -9 3660.11 619.789   1
   1  23   7 3923.13 698.242  -2
   1 -23  -8 3923.13 698.242   1
   1  23   6 2827.40 720.091  -2
   1 -23  -7 2827.40 720.091   1
   1  23   5 3245.45 732.889  -2
   1 -23  -6 3245.45 732.889   1
   1  23   4 12185.7 890.474  -2
   1 -23  -5 12185.7 890.474   1
   1  23   3 12590.9 979.119  -2
   1 -23  -4 12590.9 979.119   1
  -1 -23  -2 35282.3 1263.54  -2
  -1  23   3 35282.3 1263.54   1
   1  23   1 41944.4 1812.58  -2
   1 -23  -2 41944.4 1812.58   1
   1  23   0 59839.8 1526.80  -2
   1 -23  -1 59839.8 1526.80   1
  -1  23   1 41868.0 1339.46  -2
  -1 -23   0 41868.0 1339.46   1
  -1  23   2 58185.8 1607.23  -2
  -1 -23  -1 58185.8 1607.23   1
  -1  23   3 40234.1 1407.41  -2
  -1 -23  -2 40234.1 1407.41   1
  -1  23   4 19399.3 1105.60  -2
  -1 -23  -3 19399.3 1105.60   1
   1 -23  -5 17288.8 1055.07  -2
   1  23   4 17288.8 1055.07   1
  -1  23   6 6900.66 827.851  -2
  -1 -23  -5 6900.66 827.851   1
  -1  23   7 4093.55 734.773  -2
  -1 -23  -6 4093.55 734.773   1
   1 -23  -8 1882.26 630.114  -2
   1  23   7 1882.26 630.114   1
  -1  23   9 2032.74 593.138  -2
  -1 -23  -8 2032.74 593.138   1
  -1  23  10 14640.8 720.167  -2
  -1 -23  -9 14640.8 720.167   1
   1  24   7 30677.8 921.077  -2
   1 -24  -8 30677.8 921.077   1
   1  24   6 49968.0 1209.40  -2
   1 -24  -7 49968.0 1209.40   1
  -1 -24  -5 23893.2 931.088  -2
  -1  24   6 23893.2 931.088   1
   1  24   4 39558.7 1360.22  -2
   1 -24  -5 39558.7 1360.22   1
   1  24   3 9840.84 854.242  -2
   1 -24  -4 9840.84 854.242   1
   1 -24   2 12618.4 764.870  -2
   1  24  -3 12618.4 764.870   1
   1  24   1 1064.97 574.694  -2
   1 -24  -2 1064.97 574.694   1
  -1 -24   0 1881.21 537.328  -2
  -1  24   1 1881.21 537.328   1
   1  24  -1 888.890 568.857  -2
   1 -24   0 888.890 568.857   1
  -1  24   2 1605.93 565.117  -2
  -1 -24  -1 1605.93 565.117   1
  -1  24   3 8652.19 751.349  -2
  -1 -24  -2 8652.19 751.349   1
  -1  24   4 14333.5 985.476  -2
  -1 -24  -3 14333.5 985.476   1
   1 -24  -5 26915.0 1255.11  -2
   1  24   4 26915.0 1255.11   1
   1 -24  -6 41181.9 1435.36  -2
   1  24   5 41181.9 1435.36   1
  -1  24   7 37127.1 1085.08  -2
  -1 -24  -6 37127.1 1085.08   1
  -1  24   8 50480.5 1150.44  -2
  -1 -24  -7 50480.5 1150.44   1
   1  25   3 29943.0 851.506  -2
   1 -25  -4 29943.0 851.506   1
  -1 -25  -2 20897.6 1969.59  -2
  -1  25   3 20897.6 1969.59   1
   1 -25   1 22390.5 1697.02  -2
   1  25  -2 22390.5 1697.02   1
   1 -25   0 23260.3 1841.20  -2
   1  25  -1 23260.3 1841.20   1
   1 -25  -1 11892.6 620.069  -2
   1  25   0 11892.6 620.069   1
   1 -25  -2 33624.6 875.439  -2
   1  25   1 33624.6 875.439   1
   1 -25  -3 12795.1 640.775  -2
   1  25   2 12795.1 640.775   1
   1 -25  -4 42937.5 963.510  -2
   1  25   3 42937.5 963.510   1
   2   0  22 786.938 484.042  -2
   2   0 -24 786.938 484.042   1
   2   0  21 207.451 635.529  -2
   2   0 -23 207.451 635.529   1
   2   0  20 14068.0 1033.32  -2
   2   0 -22 14068.0 1033.32   1
   2   0  19 87.2304 889.997  -2
   2   0 -21 87.2304 889.997   1
   2   0  18 30376.8 1555.29  -2
   2   0 -20 30376.8 1555.29   1
   2   0  17 490.134 1026.12  -2
   2   0 -19 490.134 1026.12   1
   2   0  16 43810.2 2004.45  -2
   2   0 -18 43810.2 2004.45   1
   2   0  15-192.115 1129.72  -2
   2   0 -17-192.115 1129.72   1
   2   0  14 80632.5 2357.43  -2
   2   0 -16 80632.5 2357.43   1
   2   0  13 2697.71 1844.55  -2
   2   0 -15 2697.71 1844.55   1
  -2   0 -12 135781. 10052.7  -2
  -2   0  14 135781. 10052.7   1
  -2   0 -11 1055.18 1189.10  -2
  -2   0  13 1055.18 1189.10   1
  -2   0 -10 13644.3 1892.41  -2
  -2   0  12 13644.3 1892.41   1
   2   0   9 584.344 1354.19  -2
   2   0 -11 584.344 1354.19   1
  -2   0  -8 13165.0 1753.80  -2
  -2   0  10 13165.0 1753.80   1
  -2   0  -7 67.4014 1018.19  -2
  -2   0   9 67.4014 1018.19   1
   2   0   6 7974.36 1492.09  -2
   2   0  -8 7974.36 1492.09   1
   2   0   5 37.3400 1191.47  -2
   2   0  -7 37.3400 1191.47   1
   2   0   4 117034. 2978.45  -2
   2   0  -6 117034. 2978.45   1
   2   0  -5 182.522 158.446   1
   2   0   3 144.201 832.427  -2
   2   0  -5 144.201 832.427   1
  -2   0  -2 71315.2 1169.99  -2
  -2   0   4 71315.2 1169.99   1
   2   0   1 573.509 845.519  -2
   2   0  -3 573.509 845.519   1
   2   0   0 371825. 19016.0  -2
   2   0  -2 371825. 19016.0   1
   2   0  -1 327.247 660.327  -2
   2   0  -1 327.247 660.327   1
   2   0  -2 492183. 17239.1  -2
   2   0   0 492183. 17239.1   1
   2   0  -3 74.2425 790.849  -2
   2   0   1 74.2425 790.849   1
   2   0  -4 60950.1 1658.88  -2
   2   0   2 60950.1 1658.88   1
   2   0  -5 1165.76 1048.05  -2
   2   0   3 1165.76 1048.05   1
   2   0  -6 161427. 3412.07  -2
   2   0   4 161427. 3412.07   1
   2   0  -7 1048.97 1281.53  -2
   2   0   5 1048.97 1281.53   1
   2   0  -8 3836.20 1396.38  -2
   2   0   6 3836.20 1396.38   1
   2   0  -9 2116.91 1816.46  -2
   2   0   7 2116.91 1816.46   1
   2   0 -10 8730.42 1805.14  -2
   2   0   8 8730.42 1805.14   1
  -2   0  11 932.725 1188.10  -2
  -2   0  -9 932.725 1188.10   1
   2   0 -12 13493.2 2037.75  -2
   2   0  10 13493.2 2037.75   1
   2   0 -13 457.861 2106.72  -2
   2   0  11 457.861 2106.72   1
   2   0 -14 136090. 5167.34  -2
   2   0  12 136090. 5167.34   1
  -2   0  16 137071. 3810.04  -2
  -2   0 -14 137071. 3810.04   1
  -2   0  17 464.167 1176.81  -2
  -2   0 -15 464.167 1176.81   1
  -2   0  18 77278.5 2460.69  -2
  -2   0 -16 77278.5 2460.69   1
  -2   0  19 275.502 1103.69  -2
  -2   0 -17 275.502 1103.69   1
  -2   0  20 46130.4 1855.60  -2
  -2   0 -18 46130.4 1855.60   1
  -2   0  21-219.611 909.900  -2
  -2   0 -19-219.611 909.900   1
  -2   0  22 14581.9 1024.54  -2
  -2   0 -20 14581.9 1024.54   1
  -2   0  23-181.466 631.447  -2
  -2   0 -21-181.466 631.447   1
  -2   0  24 377.084 463.491  -2
  -2   0 -22 377.084 463.491   1
   2  -1  22 12117.3 1003.83  -2
   2   1 -24 12117.3 1003.83   1
   2   1  21 965.286 653.012  -2
   2  -1 -23 965.286 653.012   1
   2  -1  20 14697.2 1049.76  -2
   2   1 -22 14697.2 1049.76   1
   2  -1  19 2382.26 930.489  -2
   2   1 -21 2382.26 930.489   1
   2  -1  18 13745.5 1285.19  -2
   2   1 -20 13745.5 1285.19   1
   2   1  17 14299.9 1373.32  -2
   2  -1 -19 14299.9 1373.32   1
   2  -1  16 21837.5 2173.88  -2
   2   1 -18 21837.5 2173.88   1
   2  -1  15 32854.3 2489.26  -2
   2   1 -17 32854.3 2489.26   1
   2   1  14 22680.0 1769.51  -2
   2  -1 -16 22680.0 1769.51   1
  -2   1 -13 31244.2 2433.39  -2
  -2  -1  15 31244.2 2433.39   1
  -2  -1 -12 1638.39 1510.75  -2
  -2   1  14 1638.39 1510.75   1
  -2   1 -11 23679.7 2208.87  -2
  -2  -1  13 23679.7 2208.87   1
   2   1  10 50975.6 2728.47  -2
   2  -1 -12 50975.6 2728.47   1
  -2  -1  -9 34655.8 2534.97  -2
  -2   1  11 34655.8 2534.97   1
   2  -1   8 127539. 3990.55  -2
   2   1 -10 127539. 3990.55   1
  -2   1  -7 27357.9 2175.47  -2
  -2  -1   9 27357.9 2175.47   1
  -2   1  -6 148445. 3632.92  -2
  -2  -1   8 148445. 3632.92   1
  -2  -1  -5 20471.9 1714.23  -2
  -2   1   7 20471.9 1714.23   1
   2   1  -6 27706.9 781.044   1
  -2  -1  -4 287269. 4142.77  -2
  -2   1   6 287269. 4142.77   1
   2   1  -5 151962. 1268.70   1
   2   1   3 229228. 3867.15  -2
   2  -1  -5 229228. 3867.15   1
   2  -1   2 220814. 2736.02  -2
   2   1  -4 220814. 2736.02   1
   2  -1   1 36559.9 1406.41  -2
   2   1  -3 36559.9 1406.41   1
   2  -1   0 72625.2 1783.19  -2
   2   1  -2 72625.2 1783.19   1
   2   1  -1 88178.5 1843.78  -2
   2  -1  -1 88178.5 1843.78   1
   2   1  -2 52144.3 1081.03  -2
   2  -1   0 52144.3 1081.03   1
   2  -1  -3 23203.4 979.321  -2
   2   1   1 23203.4 979.321   1
   2   1  -4 222988. 9670.98  -2
   2  -1   2 222988. 9670.98   1
   2   1  -5 229236. 10383.1  -2
   2  -1   3 229236. 10383.1   1
   2  -1  -6 312660. 4507.74  -2
   2   1   4 312660. 4507.74   1
  -2  -1   7 24516.9 1808.15  -2
  -2   1  -5 24516.9 1808.15   1
  -2  -1   8 166884. 4213.25  -2
  -2   1  -6 166884. 4213.25   1
  -2  -1   9 30376.6 2507.48  -2
  -2   1  -7 30376.6 2507.48   1
  -2  -1  10 116864. 4593.87  -2
  -2   1  -8 116864. 4593.87   1
   2   1 -11 25288.9 2750.20  -2
   2  -1   9 25288.9 2750.20   1
  -2  -1  12 70059.0 4119.09  -2
  -2   1 -10 70059.0 4119.09   1
   2   1 -13 17238.9 2396.66  -2
   2  -1  11 17238.9 2396.66   1
   2   1 -14 5505.39 2376.02  -2
   2  -1  12 5505.39 2376.02   1
   2  -1 -15 14607.6 3175.12  -2
   2   1  13 14607.6 3175.12   1
  -2   1  16 18934.6 2012.88  -2
  -2  -1 -14 18934.6 2012.88   1
  -2  -1  17 24887.1 1684.91  -2
  -2   1 -15 24887.1 1684.91   1
  -2   1  18 41335.7 1983.45  -2
  -2  -1 -16 41335.7 1983.45   1
  -2  -1  19 19810.9 1536.93  -2
  -2   1 -17 19810.9 1536.93   1
  -2   1  20 26559.9 1526.73  -2
  -2  -1 -18 26559.9 1526.73   1
  -2  -1  21 955.400 913.274  -2
  -2   1 -19 955.400 913.274   1
  -2  -1  22 22861.7 1161.71  -2
  -2   1 -20 22861.7 1161.71   1
  -2  -1  23 2225.67 657.754  -2
  -2   1 -21 2225.67 657.754   1
  -2   1  24 18193.6 676.286  -2
  -2  -1 -22 18193.6 676.286   1
   2  -2  22 4359.64 555.470  -2
   2   2 -24 4359.64 555.470   1
   2   2  21 41128.1 1116.60  -2
   2  -2 -23 41128.1 1116.60   1
   2   2  20 8650.68 913.088  -2
   2  -2 -22 8650.68 913.088   1
   2   2  19 58740.3 2024.74  -2
   2  -2 -21 58740.3 2024.74   1
   2   2  18 27396.4 1496.68  -2
   2  -2 -20 27396.4 1496.68   1
   2   2  17 57936.5 2073.21  -2
   2  -2 -19 57936.5 2073.21   1
   2  -2  16 35043.4 1683.71  -2
   2   2 -18 35043.4 1683.71   1
   2  -2  15 30270.2 1673.22  -2
   2   2 -17 30270.2 1673.22   1
   2  -2  14 56267.7 2216.01  -2
   2   2 -16 56267.7 2216.01   1
   2  -2  13 572.848 1114.97  -2
   2   2 -15 572.848 1114.97   1
  -2  -2 -12 24035.5 2494.03  -2
  -2   2  14 24035.5 2494.03   1
   2   2  11 45789.8 2847.28  -2
   2  -2 -13 45789.8 2847.28   1
  -2  -2 -10 3995.92 1509.62  -2
  -2   2  12 3995.92 1509.62   1
   2   2   9 191129. 4711.66  -2
   2  -2 -11 191129. 4711.66   1
   2  -2   8 3684.42 1453.89  -2
   2   2 -10 3684.42 1453.89   1
  -2  -2  -7 114221. 3333.29  -2
  -2   2   9 114221. 3333.29   1
  -2   2  -6 18691.1 1813.00  -2
  -2  -2   8 18691.1 1813.00   1
   2  -2   5 279715. 5656.90  -2
   2   2  -7 279715. 5656.90   1
  -2  -2  -4 111535. 2934.48  -2
  -2   2   6 111535. 2934.48   1
  -2   2  -3 140456. 2353.41  -2
  -2  -2   5 140456. 2353.41   1
   2   2   2 37672.7 2094.85  -2
   2  -2  -4 37672.7 2094.85   1
  -2   2  -1 87882.0 2093.78  -2
  -2  -2   3 87882.0 2093.78   1
  -2   2   0 46432.0 1589.69  -2
  -2  -2   2 46432.0 1589.69   1
   2  -2  -1 11296.9 1180.04  -2
   2   2  -1 11296.9 1180.04   1
  -2   2   2 31434.4 882.770  -2
  -2  -2   0 31434.4 882.770   1
  -2   2  -1 27515.2 299.865   1
   2  -2  -3 66584.7 1561.64  -2
   2   2   1 66584.7 1561.64   1
  -2   2   4 21086.5 903.383  -2
  -2  -2  -2 21086.5 903.383   1
   2  -2  -5 133363. 3283.87  -2
   2   2   3 133363. 3283.87   1
   2   2  -6 59618.6 5352.50  -2
   2  -2   4 59618.6 5352.50   1
  -2  -2   7 340918. 2974.08  -2
  -2   2  -5 340918. 2974.08   1
   2  -2  -8 8050.57 1735.67  -2
   2   2   6 8050.57 1735.67   1
  -2  -2   9 133559. 4083.28  -2
  -2   2  -7 133559. 4083.28   1
   2  -2 -10 3159.57 1800.58  -2
   2   2   8 3159.57 1800.58   1
  -2  -2  11 141202. 6717.95  -2
  -2   2  -9 141202. 6717.95   1
   2   2 -12 8460.64 1498.10  -2
   2  -2  10 8460.64 1498.10   1
  -2  -2  13 22540.4 2955.32  -2
  -2   2 -11 22540.4 2955.32   1
   2  -2 -14 33134.5 2953.45  -2
   2   2  12 33134.5 2953.45   1
   2   2 -15 3270.07 1733.59  -2
   2  -2  13 3270.07 1733.59   1
  -2  -2  16 83159.6 2866.95  -2
  -2   2 -14 83159.6 2866.95   1
  -2   2  17 20352.0 1520.53  -2
  -2  -2 -15 20352.0 1520.53   1
  -2   2  18 40834.4 1966.03  -2
  -2  -2 -16 40834.4 1966.03   1
  -2  -2  19 61378.8 2547.08  -2
  -2   2 -17 61378.8 2547.08   1
  -2   2  20 20565.1 1418.94  -2
  -2  -2 -18 20565.1 1418.94   1
  -2   2  21 61814.2 8002.73  -2
  -2  -2 -19 61814.2 8002.73   1
  -2   2  22 3824.19 833.628  -2
  -2  -2 -20 3824.19 833.628   1
  -2   2  23 27219.7 998.601  -2
  -2  -2 -21 27219.7 998.601   1
  -2  -2  24 2798.85 552.242  -2
  -2   2 -22 2798.85 552.242   1
   2  -3  22 2001.00 534.479  -2
   2   3 -24 2001.00 534.479   1
   2   3  21 4004.57 895.857  -2
   2  -3 -23 4004.57 895.857   1
   2  -3  20 1559.58 748.033  -2
   2   3 -22 1559.58 748.033   1
   2   3  19 2140.21 878.708  -2
   2  -3 -21 2140.21 878.708   1
   2   3  18 15272.2 1252.03  -2
   2  -3 -20 15272.2 1252.03   1
   2   3  17 40107.4 1608.72  -2
   2  -3 -19 40107.4 1608.72   1
   2   3  16 24560.9 1509.59  -2
   2  -3 -18 24560.9 1509.59   1
   2   3  15 100403. 2648.21  -2
   2  -3 -17 100403. 2648.21   1
   2  -3  14 54573.0 2348.90  -2
   2   3 -16 54573.0 2348.90   1
  -2  -3 -13 127794. 3921.26  -2
  -2   3  15 127794. 3921.26   1
  -2  -3 -12 42096.6 3309.55  -2
  -2   3  14 42096.6 3309.55   1
  -2   3 -11 245742. 6056.94  -2
  -2  -3  13 245742. 6056.94   1
  -2  -3 -10 34361.4 2336.43  -2
  -2   3  12 34361.4 2336.43   1
  -2  -3  -9 94485.4 3735.10  -2
  -2   3  11 94485.4 3735.10   1
   2  -3   8 18437.9 1862.60  -2
   2   3 -10 18437.9 1862.60   1
  -2  -3  -7 41516.4 2620.35  -2
  -2   3   9 41516.4 2620.35   1
  -2  -3  -6 114640. 3513.67  -2
  -2   3   8 114640. 3513.67   1
   2  -3   5 19644.6 1675.42  -2
   2   3  -7 19644.6 1675.42   1
   2   3   4 130027. 2875.97  -2
   2  -3  -6 130027. 2875.97   1
   2   3   3 223491. 2832.04  -2
   2  -3  -5 223491. 2832.04   1
   2  -3   2 59640.9 1748.96  -2
   2   3  -4 59640.9 1748.96   1
   2   3   1 218061. 3289.67  -2
   2  -3  -3 218061. 3289.67   1
   2  -3   0 86465.3 1869.36  -2
   2   3  -2 86465.3 1869.36   1
  -2  -3   1 913730. 15357.3  -2
  -2   3   1 913730. 15357.3   1
   2  -3  -2 164687. 2896.55  -2
   2   3   0 164687. 2896.55   1
   2  -3  -3 184379. 4985.17  -2
   2   3   1 184379. 4985.17   1
   2   3  -4 86883.3 1907.84  -2
   2  -3   2 86883.3 1907.84   1
   2   3  -5 184940. 13382.9  -2
   2  -3   3 184940. 13382.9   1
  -2  -3   6 186697. 4109.42  -2
  -2   3  -4 186697. 4109.42   1
   2  -3  -7 15366.5 1396.40  -2
   2   3   5 15366.5 1396.40   1
  -2  -3   8 119975. 9604.40  -2
  -2   3  -6 119975. 9604.40   1
   2  -3  -9 48351.2 2666.38  -2
   2   3   7 48351.2 2666.38   1
  -2  -3  10 13110.7 1759.66  -2
  -2   3  -8 13110.7 1759.66   1
  -2  -3  11 57990.4 3395.73  -2
  -2   3  -9 57990.4 3395.73   1
   2  -3 -12 18380.2 2323.08  -2
   2   3  10 18380.2 2323.08   1
   2   3 -13 151501. 6939.24  -2
   2  -3  11 151501. 6939.24   1
  -2  -3  14 34027.8 6833.66  -2
  -2   3 -12 34027.8 6833.66   1
  -2  -3  15 91829.4 6042.00  -2
  -2   3 -13 91829.4 6042.00   1
  -2  -3  16 52635.8 2345.16  -2
  -2   3 -14 52635.8 2345.16   1
  -2  -3  17 109700. 2871.63  -2
  -2   3 -15 109700. 2871.63   1
  -2  -3  18 45276.4 1872.08  -2
  -2   3 -16 45276.4 1872.08   1
  -2   3  19 38688.2 1784.08  -2
  -2  -3 -17 38688.2 1784.08   1
  -2  -3  20 28470.1 1482.68  -2
  -2   3 -18 28470.1 1482.68   1
  -2   3  21 1847.35 899.730  -2
  -2  -3 -19 1847.35 899.730   1
  -2  -3  22 2229.37 764.391  -2
  -2   3 -20 2229.37 764.391   1
  -2  -3  23 2480.33 720.678  -2
  -2   3 -21 2480.33 720.678   1
  -2  -3  24 1552.86 524.882  -2
  -2   3 -22 1552.86 524.882   1
   2  -4  21 54725.1 1269.22  -2
   2   4 -23 54725.1 1269.22   1
   2  -4  20 33995.3 1284.24  -2
   2   4 -22 33995.3 1284.24   1
   2   4  19 90911.5 5955.72  -2
   2  -4 -21 90911.5 5955.72   1
   2  -4  18 33955.2 1460.33  -2
   2   4 -20 33955.2 1460.33   1
   2   4  17 34656.8 1572.01  -2
   2  -4 -19 34656.8 1572.01   1
   2   4  16 64188.3 2290.33  -2
   2  -4 -18 64188.3 2290.33   1
   2  -4  15 9174.31 1210.26  -2
   2   4 -17 9174.31 1210.26   1
   2  -4  14 12176.9 1468.01  -2
   2   4 -16 12176.9 1468.01   1
   2  -4  13 4232.93 1350.53  -2
   2   4 -15 4232.93 1350.53   1
  -2  -4 -12 14772.1 2124.02  -2
  -2   4  14 14772.1 2124.02   1
  -2   4 -11 25266.5 2331.91  -2
  -2  -4  13 25266.5 2331.91   1
   2  -4  10 81009.2 3479.99  -2
   2   4 -12 81009.2 3479.99   1
   2  -4   9 82053.5 3598.22  -2
   2   4 -11 82053.5 3598.22   1
   2  -4   8 166032. 5383.81  -2
   2   4 -10 166032. 5383.81   1
  -2  -4  -7 197236. 4738.55  -2
  -2   4   9 197236. 4738.55   1
   2   4   6 140005. 3828.04  -2
   2  -4  -8 140005. 3828.04   1
   2  -4   5 272132. 4828.81  -2
   2   4  -7 272132. 4828.81   1
   2   4   4 251447. 4586.96  -2
   2  -4  -6 251447. 4586.96   1
   2  -4   3 208402. 3332.04  -2
   2   4  -5 208402. 3332.04   1
   2   4   2 109248. 2638.42  -2
   2  -4  -4 109248. 2638.42   1
   2   4   1 73709.2 2413.33  -2
   2  -4  -3 73709.2 2413.33   1
   2  -4   0 13747.3 1235.69  -2
   2   4  -2 13747.3 1235.69   1
   2  -4  -1 64779.4 2288.09  -2
   2   4  -1 64779.4 2288.09   1
   2  -4  -2 24358.1 1094.39  -2
   2   4   0 24358.1 1094.39   1
   2  -4  -3 39527.5 1236.86  -2
   2   4   1 39527.5 1236.86   1
   2  -4  -4 88815.8 2142.11  -2
   2   4   2 88815.8 2142.11   1
   2  -4  -5 194379. 3811.89  -2
   2   4   3 194379. 3811.89   1
  -2  -4   6 164171. 3126.77  -2
  -2   4  -4 164171. 3126.77   1
  -2  -4   7 285705. 5071.21  -2
  -2   4  -5 285705. 5071.21   1
   2  -4  -8 126740. 3263.16  -2
   2   4   6 126740. 3263.16   1
   2  -4  -9 181285. 3757.71  -2
   2   4   7 181285. 3757.71   1
   2   4 -10 114032. 3255.88  -2
   2  -4   8 114032. 3255.88   1
   2   4 -11 108084. 3800.81  -2
   2  -4   9 108084. 3800.81   1
   2  -4 -12 62954.9 2880.09  -2
   2   4  10 62954.9 2880.09   1
   2   4 -13 41163.4 8279.73  -2
   2  -4  11 41163.4 8279.73   1
   2   4 -14 8815.88 3725.67  -2
   2  -4  12 8815.88 3725.67   1
  -2  -4  15 9400.58 1425.96  -2
  -2   4 -13 9400.58 1425.96   1
  -2   4  16 6871.89 1497.55  -2
  -2  -4 -14 6871.89 1497.55   1
  -2  -4  17 3766.77 1152.20  -2
  -2   4 -15 3766.77 1152.20   1
  -2   4  18 30819.7 1579.37  -2
  -2  -4 -16 30819.7 1579.37   1
  -2   4  19 39609.2 1672.68  -2
  -2  -4 -17 39609.2 1672.68   1
  -2   4  20 20419.9 1268.57  -2
  -2  -4 -18 20419.9 1268.57   1
  -2   4  21 65142.6 1730.01  -2
  -2  -4 -19 65142.6 1730.01   1
  -2  -4  22 29576.2 1315.56  -2
  -2   4 -20 29576.2 1315.56   1
  -2  -4  23 41385.5 1239.20  -2
  -2   4 -21 41385.5 1239.20   1
  -2   4 -22 14665.3 623.501   1
   2  -5  21 19680.8 869.766  -2
   2   5 -23 19680.8 869.766   1
   2  -5  20 1389.15 757.444  -2
   2   5 -22 1389.15 757.444   1
   2  -5  19 7349.26 849.914  -2
   2   5 -21 7349.26 849.914   1
   2  -5  18 5782.08 967.465  -2
   2   5 -20 5782.08 967.465   1
   2  -5  17 28005.2 1502.79  -2
   2   5 -19 28005.2 1502.79   1
   2  -5  16 34561.3 1651.78  -2
   2   5 -18 34561.3 1651.78   1
   2  -5  15 39464.6 1827.91  -2
   2   5 -17 39464.6 1827.91   1
   2  -5  14 134015. 2823.36  -2
   2   5 -16 134015. 2823.36   1
  -2  -5 -13 88823.8 3013.80  -2
  -2   5  15 88823.8 3013.80   1
   2  -5  12 136971. 4737.71  -2
   2   5 -14 136971. 4737.71   1
  -2  -5 -11 93985.4 4269.99  -2
  -2   5  13 93985.4 4269.99   1
  -2   5 -10 103591. 4198.33  -2
  -2  -5  12 103591. 4198.33   1
   2  -5   9 85162.8 3645.98  -2
   2   5 -11 85162.8 3645.98   1
   2   5   8 32016.6 2313.57  -2
   2  -5 -10 32016.6 2313.57   1
   2  -5   7 56468.4 2933.27  -2
   2   5  -9 56468.4 2933.27   1
   2  -5   6 7327.76 1318.70  -2
   2   5  -8 7327.76 1318.70   1
   2   5   5 6773.55 1262.44  -2
   2  -5  -7 6773.55 1262.44   1
   2  -5   4 30404.1 2121.23  -2
   2   5  -6 30404.1 2121.23   1
   2  -5   3 46449.3 1941.26  -2
   2   5  -5 46449.3 1941.26   1
   2  -5   2 170550. 3982.25  -2
   2   5  -4 170550. 3982.25   1
   2  -5   1 176972. 3652.47  -2
   2   5  -3 176972. 3652.47   1
  -2  -5   0 292931. 4280.73  -2
  -2   5   2 292931. 4280.73   1
   2  -5  -1 224870. 3888.53  -2
   2   5  -1 224870. 3888.53   1
   2  -5  -2 388532. 4704.10  -2
   2   5   0 388532. 4704.10   1
   2  -5  -3 257620. 2904.52  -2
   2   5   1 257620. 2904.52   1
   2  -5  -4 254698. 7603.61  -2
   2   5   2 254698. 7603.61   1
   2  -5  -5 63112.3 2519.55  -2
   2   5   3 63112.3 2519.55   1
   2   5  -6 57557.0 1945.38  -2
   2  -5   4 57557.0 1945.38   1
   2  -5  -7 14846.5 1194.17  -2
   2   5   5 14846.5 1194.17   1
  -2  -5   8 6069.30 1171.20  -2
  -2   5  -6 6069.30 1171.20   1
   2   5  -9 25063.5 1466.87  -2
   2  -5   7 25063.5 1466.87   1
   2  -5 -10 35206.7 2342.26  -2
   2   5   8 35206.7 2342.26   1
  -2  -5  11 39997.7 2425.49  -2
  -2   5  -9 39997.7 2425.49   1
  -2  -5  12 140095. 4203.83  -2
  -2   5 -10 140095. 4203.83   1
  -2  -5  13 39442.5 3213.51  -2
  -2   5 -11 39442.5 3213.51   1
   2   5 -14 123088. 29463.9  -2
   2  -5  12 123088. 29463.9   1
  -2  -5  15 59609.0 2311.24  -2
  -2   5 -13 59609.0 2311.24   1
  -2  -5  16 114636. 2855.85  -2
  -2   5 -14 114636. 2855.85   1
  -2  -5  17 36947.5 2130.20  -2
  -2   5 -15 36947.5 2130.20   1
  -2  -5  18 34353.1 2043.57  -2
  -2   5 -16 34353.1 2043.57   1
  -2  -5  19 30443.0 1592.38  -2
  -2   5 -17 30443.0 1592.38   1
  -2  -5  20 8815.99 1099.37  -2
  -2   5 -18 8815.99 1099.37   1
  -2  -5  21 12314.0 1203.79  -2
  -2   5 -19 12314.0 1203.79   1
  -2  -5  22 1027.82 830.429  -2
  -2   5 -20 1027.82 830.429   1
  -2  -5  23 20114.7 960.638  -2
  -2   5 -21 20114.7 960.638   1
   2  -6  21 7210.50 655.700  -2
   2   6 -23 7210.50 655.700   1
   2  -6  20 33668.5 1176.92  -2
   2   6 -22 33668.5 1176.92   1
   2  -6  19 23411.5 1372.86  -2
   2   6 -21 23411.5 1372.86   1
   2  -6  18 45386.5 1599.10  -2
   2   6 -20 45386.5 1599.10   1
   2  -6  17 8966.57 1124.49  -2
   2   6 -19 8966.57 1124.49   1
   2  -6  16 38205.8 1671.15  -2
   2   6 -18 38205.8 1671.15   1
   2  -6  15 17783.7 1396.11  -2
   2   6 -17 17783.7 1396.11   1
   2  -6  14 9082.01 1245.66  -2
   2   6 -16 9082.01 1245.66   1
   2  -6  13 37077.9 1815.92  -2
   2   6 -15 37077.9 1815.92   1
  -2  -6 -12 16453.8 2206.58  -2
  -2   6  14 16453.8 2206.58   1
   2  -6  11 39417.6 2922.43  -2
   2   6 -13 39417.6 2922.43   1
  -2   6 -10 80042.3 3365.38  -2
  -2  -6  12 80042.3 3365.38   1
  -2  -6  -9 44081.6 2289.71  -2
  -2   6  11 44081.6 2289.71   1
  -2   6  -8 153520. 5122.80  -2
  -2  -6  10 153520. 5122.80   1
   2  -6   7 39973.4 3210.56  -2
   2   6  -9 39973.4 3210.56   1
   2  -6   6 110741. 3053.80  -2
   2   6  -8 110741. 3053.80   1
  -2   6  -5 11364.1 1439.41  -2
  -2  -6   7 11364.1 1439.41   1
   2   6   4 123470. 3281.97  -2
   2  -6  -6 123470. 3281.97   1
  -2  -6  -3 78489.2 2907.90  -2
  -2   6   5 78489.2 2907.90   1
  -2  -6  -2 66549.3 2490.47  -2
  -2   6   4 66549.3 2490.47   1
   2   6   1 126624. 3275.35  -2
   2  -6  -3 126624. 3275.35   1
   2   6   0 35842.8 1777.01  -2
   2  -6  -2 35842.8 1777.01   1
   2  -6  -1 223659. 4168.13  -2
   2   6  -1 223659. 4168.13   1
   2  -6  -2 74264.9 2493.54  -2
   2   6   0 74264.9 2493.54   1
  -2   6   3 134336. 3100.23  -2
  -2  -6  -1 134336. 3100.23   1
   2  -6  -4 102005. 3963.76  -2
   2   6   2 102005. 3963.76   1
  -2  -6   5 43502.9 2209.85  -2
  -2   6  -3 43502.9 2209.85   1
  -2  -6   6 154555. 7607.74  -2
  -2   6  -4 154555. 7607.74   1
  -2  -6   7 11344.6 1739.43  -2
  -2   6  -5 11344.6 1739.43   1
   2  -6  -8 97354.2 3473.49  -2
   2   6   6 97354.2 3473.49   1
   2  -6  -9 55111.0 4019.82  -2
   2   6   7 55111.0 4019.82   1
   2   6 -10 110555. 3859.48  -2
   2  -6   8 110555. 3859.48   1
   2  -6 -11 103468. 3829.29  -2
   2   6   9 103468. 3829.29   1
  -2  -6  12 50982.1 2842.31  -2
  -2   6 -10 50982.1 2842.31   1
  -2  -6  13 60246.1 21426.7  -2
  -2   6 -11 60246.1 21426.7   1
  -2  -6  14 8889.85 1565.91  -2
  -2   6 -12 8889.85 1565.91   1
  -2  -6  15 56244.8 2163.37  -2
  -2   6 -13 56244.8 2163.37   1
  -2  -6  16 15206.1 1364.57  -2
  -2   6 -14 15206.1 1364.57   1
  -2  -6  17 17919.2 1362.90  -2
  -2   6 -15 17919.2 1362.90   1
  -2  -6  18 34587.3 1731.09  -2
  -2   6 -16 34587.3 1731.09   1
  -2  -6  19 5199.93 1078.00  -2
  -2   6 -17 5199.93 1078.00   1
  -2  -6  20 27077.5 1662.90  -2
  -2   6 -18 27077.5 1662.90   1
  -2  -6  21 10917.1 987.149  -2
  -2   6 -19 10917.1 987.149   1
  -2  -6  22 30400.8 1219.67  -2
  -2   6 -20 30400.8 1219.67   1
  -2  -6  23 7071.04 724.674  -2
  -2   6 -21 7071.04 724.674   1
   2  -7  21 27276.1 828.156  -2
   2   7 -23 27276.1 828.156   1
   2  -7  20-255.876 538.883  -2
   2   7 -22-255.876 538.883   1
   2  -7  19 25300.6 1239.29  -2
   2   7 -21 25300.6 1239.29   1
   2  -7  18 2386.72 848.355  -2
   2   7 -20 2386.72 848.355   1
   2  -7  17 14969.3 1169.55  -2
   2   7 -19 14969.3 1169.55   1
   2  -7  16 3629.59 991.683  -2
   2   7 -18 3629.59 991.683   1
   2  -7  15 9869.92 1236.15  -2
   2   7 -17 9869.92 1236.15   1
   2  -7  14 24650.0 1576.18  -2
   2   7 -16 24650.0 1576.18   1
   2  -7  13 24079.7 1793.93  -2
   2   7 -15 24079.7 1793.93   1
   2  -7  12 31104.4 1855.22  -2
   2   7 -14 31104.4 1855.22   1
  -2   7 -11 30328.2 2779.91  -2
  -2  -7  13 30328.2 2779.91   1
  -2   7 -10 31352.1 2480.69  -2
  -2  -7  12 31352.1 2480.69   1
   2  -7   9 56831.8 2968.40  -2
   2   7 -11 56831.8 2968.40   1
  -2   7  -8 15169.7 1887.50  -2
  -2  -7  10 15169.7 1887.50   1
   2  -7   7 107014. 3571.84  -2
   2   7  -9 107014. 3571.84   1
   2  -7   6 4750.67 1583.01  -2
   2   7  -8 4750.67 1583.01   1
   2   7   5 53116.4 2244.09  -2
   2  -7  -7 53116.4 2244.09   1
   2  -7   4 8500.87 1457.48  -2
   2   7  -6 8500.87 1457.48   1
   2   7   3 49605.2 2365.32  -2
   2  -7  -5 49605.2 2365.32   1
   2  -7   2 37351.1 2397.83  -2
   2   7  -4 37351.1 2397.83   1
  -2  -7  -1 11332.0 1630.73  -2
  -2   7   3 11332.0 1630.73   1
   2  -7   0 86335.0 2973.88  -2
   2   7  -2 86335.0 2973.88   1
   2  -7  -1 5232.80 1263.85  -2
   2   7  -1 5232.80 1263.85   1
   2  -7  -2 101422. 2952.28  -2
   2   7   0 101422. 2952.28   1
   2   7  -3 8085.62 1151.54  -2
   2  -7   1 8085.62 1151.54   1
   2   7  -4 36507.6 2064.30  -2
   2  -7   2 36507.6 2064.30   1
   2  -7  -5 81855.3 11322.4  -2
   2   7   3 81855.3 11322.4   1
  -2  -7   6 12569.3 1691.19  -2
  -2   7  -4 12569.3 1691.19   1
   2   7  -7 70321.7 3669.69  -2
   2  -7   5 70321.7 3669.69   1
  -2  -7   8 6790.03 1697.94  -2
  -2   7  -6 6790.03 1697.94   1
   2  -7  -9 133590. 4318.61  -2
   2   7   7 133590. 4318.61   1
   2   7 -10 11325.3 1912.23  -2
   2  -7   8 11325.3 1912.23   1
   2   7 -11 56634.4 3528.11  -2
   2  -7   9 56634.4 3528.11   1
  -2  -7  12 29752.2 4158.82  -2
  -2   7 -10 29752.2 4158.82   1
  -2  -7  13 18041.8 7527.78  -2
  -2   7 -11 18041.8 7527.78   1
  -2  -7  14 50056.4 2177.68  -2
  -2   7 -12 50056.4 2177.68   1
  -2  -7  15 29477.4 1774.69  -2
  -2   7 -13 29477.4 1774.69   1
  -2  -7  16 33060.2 1630.96  -2
  -2   7 -14 33060.2 1630.96   1
  -2  -7  17 6622.53 1123.79  -2
  -2   7 -15 6622.53 1123.79   1
  -2  -7  18 5677.47 1014.64  -2
  -2   7 -16 5677.47 1014.64   1
  -2  -7  19 21540.4 1372.56  -2
  -2   7 -17 21540.4 1372.56   1
  -2  -7  20 2766.12 909.365  -2
  -2   7 -18 2766.12 909.365   1
  -2  -7  21 42342.8 1356.36  -2
  -2   7 -19 42342.8 1356.36   1
  -2  -7  22 737.677 596.792  -2
  -2   7 -20 737.677 596.792   1
  -2  -7  23 59174.8 1203.75  -2
  -2   7 -21 59174.8 1203.75   1
   2  -8  21 1144.01 471.996  -2
   2   8 -23 1144.01 471.996   1
   2  -8  20 3000.34 1140.61  -2
   2   8 -22 3000.34 1140.61   1
   2  -8  19 4374.22 728.150  -2
   2   8 -21 4374.22 728.150   1
   2  -8  18 374.624 864.292  -2
   2   8 -20 374.624 864.292   1
   2  -8  17 17662.7 1155.11  -2
   2   8 -19 17662.7 1155.11   1
   2  -8  16 4991.47 1033.37  -2
   2   8 -18 4991.47 1033.37   1
   2  -8  15 54973.4 2004.62  -2
   2   8 -17 54973.4 2004.62   1
   2  -8  14 8626.61 1276.27  -2
   2   8 -16 8626.61 1276.27   1
   2  -8  13 45754.5 1980.80  -2
   2   8 -15 45754.5 1980.80   1
   2  -8  12 8227.22 1432.28  -2
   2   8 -14 8227.22 1432.28   1
  -2  -8 -11 36407.7 2373.42  -2
  -2   8  13 36407.7 2373.42   1
  -2   8 -10 2120.01 1395.98  -2
  -2  -8  12 2120.01 1395.98   1
  -2  -8  -9 45358.3 2783.63  -2
  -2   8  11 45358.3 2783.63   1
  -2   8  -8 10449.0 2462.91  -2
  -2  -8  10 10449.0 2462.91   1
  -2   8  -7 34905.9 2816.79  -2
  -2  -8   9 34905.9 2816.79   1
   2  -8   6 2160.57 961.013  -2
   2   8  -8 2160.57 961.013   1
   2  -8   5 19120.9 1607.86  -2
   2   8  -7 19120.9 1607.86   1
   2   8   4 4209.39 1606.99  -2
   2  -8  -6 4209.39 1606.99   1
   2   8   3 106421. 3485.47  -2
   2  -8  -5 106421. 3485.47   1
   2  -8   2 17152.9 1978.85  -2
   2   8  -4 17152.9 1978.85   1
   2   8   1 146939. 4213.93  -2
   2  -8  -3 146939. 4213.93   1
   2  -8   0 6069.03 1187.67  -2
   2   8  -2 6069.03 1187.67   1
   2   8  -1 224658. 7728.55  -2
   2  -8  -1 224658. 7728.55   1
  -2  -8   2 4890.24 1426.85  -2
  -2   8   0 4890.24 1426.85   1
   2   8  -3 158853. 11663.7  -2
   2  -8   1 158853. 11663.7   1
   2  -8  -4 12333.1 1562.04  -2
   2   8   2 12333.1 1562.04   1
   2  -8  -5 136891. 15038.8  -2
   2   8   3 136891. 15038.8   1
   2   8  -6 3966.02 1435.35  -2
   2  -8   4 3966.02 1435.35   1
  -2  -8   7 39692.6 2688.29  -2
  -2   8  -5 39692.6 2688.29   1
  -2  -8   8 5310.84 1493.10  -2
  -2   8  -6 5310.84 1493.10   1
  -2  -8   9 18550.7 2170.30  -2
  -2   8  -7 18550.7 2170.30   1
  -2  -8  10 5855.57 1692.38  -2
  -2   8  -8 5855.57 1692.38   1
   2   8 -11 59087.0 3179.80  -2
   2  -8   9 59087.0 3179.80   1
  -2  -8  12 1480.64 2083.11  -2
  -2   8 -10 1480.64 2083.11   1
  -2  -8  13 60207.1 2357.91  -2
  -2   8 -11 60207.1 2357.91   1
  -2  -8  14 7951.29 1404.87  -2
  -2   8 -12 7951.29 1404.87   1
  -2  -8  15 69180.2 2304.12  -2
  -2   8 -13 69180.2 2304.12   1
  -2  -8  16 11401.3 1297.36  -2
  -2   8 -14 11401.3 1297.36   1
  -2  -8  17 68818.8 2014.22  -2
  -2   8 -15 68818.8 2014.22   1
  -2  -8  18 3833.14 1139.07  -2
  -2   8 -16 3833.14 1139.07   1
  -2  -8  19 37718.5 1517.75  -2
  -2   8 -17 37718.5 1517.75   1
  -2  -8  20-195.757 766.032  -2
  -2   8 -18-195.757 766.032   1
  -2  -8  21 6317.65 834.369  -2
  -2   8 -19 6317.65 834.369   1
  -2  -8  22 3956.53 620.856  -2
  -2   8 -20 3956.53 620.856   1
  -2  -8  23 710.629 523.893  -2
  -2   8 -21 710.629 523.893   1
   2  -9  20 1467.63 515.052  -2
   2   9 -22 1467.63 515.052   1
   2  -9  19 19578.6 924.360  -2
   2   9 -21 19578.6 924.360   1
   2  -9  18 6512.84 817.590  -2
   2   9 -20 6512.84 817.590   1
   2  -9  17 23814.0 1288.94  -2
   2   9 -19 23814.0 1288.94   1
   2  -9  16 16425.2 1249.52  -2
   2   9 -18 16425.2 1249.52   1
   2  -9  15 455.353 987.920  -2
   2   9 -17 455.353 987.920   1
   2  -9  14 39271.0 1823.26  -2
   2   9 -16 39271.0 1823.26   1
   2  -9  13 20161.6 1804.19  -2
   2   9 -15 20161.6 1804.19   1
   2  -9  12 54559.4 3010.62  -2
   2   9 -14 54559.4 3010.62   1
   2  -9  11 10470.7 1558.00  -2
   2   9 -13 10470.7 1558.00   1
  -2  -9 -10 22290.0 2837.98  -2
  -2   9  12 22290.0 2837.98   1
  -2  -9  -9 52745.5 3308.28  -2
  -2   9  11 52745.5 3308.28   1
  -2   9  -8 2200.60 1217.15  -2
  -2  -9  10 2200.60 1217.15   1
  -2   9  -7 63758.7 2780.27  -2
  -2  -9   9 63758.7 2780.27   1
   2  -9   6 133.299 529.772  -2
   2   9  -8 133.299 529.772   1
   2  -9   5 95573.7 3514.89  -2
   2   9  -7 95573.7 3514.89   1
  -2  -9  -4 8239.44 1538.91  -2
  -2   9   6 8239.44 1538.91   1
   2   9   3 23310.7 1945.94  -2
   2  -9  -5 23310.7 1945.94   1
  -2   9  -2 30856.2 2383.80  -2
  -2  -9   4 30856.2 2383.80   1
  -2   9  -1 1373.26 816.733  -2
  -2  -9   3 1373.26 816.733   1
   2  -9   0 93385.3 2868.85  -2
   2   9  -2 93385.3 2868.85   1
  -2  -9   1 412.906 1082.47  -2
  -2   9   1 412.906 1082.47   1
   2  -9  -2 100327. 2819.63  -2
   2   9   0 100327. 2819.63   1
   2   9  -3 670.356 1259.67  -2
   2  -9   1 670.356 1259.67   1
   2   9  -4 41650.2 5172.48  -2
   2  -9   2 41650.2 5172.48   1
   2  -9  -5 26205.6 2098.04  -2
   2   9   3 26205.6 2098.04   1
   2  -9  -6 13101.8 1813.88  -2
   2   9   4 13101.8 1813.88   1
   2   9  -7 85443.5 3726.92  -2
   2  -9   5 85443.5 3726.92   1
   2  -9  -8 543.224 1456.99  -2
   2   9   6 543.224 1456.99   1
  -2  -9   9 88469.4 3858.62  -2
  -2   9  -7 88469.4 3858.62   1
  -2  -9  10 2085.75 1528.25  -2
  -2   9  -8 2085.75 1528.25   1
  -2  -9  11 89402.6 3987.64  -2
  -2   9  -9 89402.6 3987.64   1
  -2  -9  12 18221.8 3306.22  -2
  -2   9 -10 18221.8 3306.22   1
  -2  -9  13 16703.7 1610.30  -2
  -2   9 -11 16703.7 1610.30   1
   2   9 -14 50909.5 2113.86  -2
   2  -9  12 50909.5 2113.86   1
  -2  -9  15 36000.7 1812.72  -2
  -2   9 -13 36000.7 1812.72   1
  -2  -9  16 22598.5 1569.43  -2
  -2   9 -14 22598.5 1569.43   1
  -2  -9  17 206.694 766.465  -2
  -2   9 -15 206.694 766.465   1
  -2  -9  18 12482.6 1163.73  -2
  -2   9 -16 12482.6 1163.73   1
  -2  -9  19 21678.7 1162.85  -2
  -2   9 -17 21678.7 1162.85   1
  -2  -9  20 3999.42 978.501  -2
  -2   9 -18 3999.42 978.501   1
  -2  -9  21 37594.3 1200.39  -2
  -2   9 -19 37594.3 1200.39   1
  -2  -9  22 3145.81 575.247  -2
  -2   9 -20 3145.81 575.247   1
   2 -10  20 34348.1 797.947  -2
   2  10 -22 34348.1 797.947   1
   2 -10  19 2501.21 577.468  -2
   2  10 -21 2501.21 577.468   1
   2 -10  18 38880.5 1295.74  -2
   2  10 -20 38880.5 1295.74   1
   2 -10  17 8121.82 959.650  -2
   2  10 -19 8121.82 959.650   1
   2 -10  16 36588.9 1554.43  -2
   2  10 -18 36588.9 1554.43   1
   2 -10  15 20242.4 1389.37  -2
   2  10 -17 20242.4 1389.37   1
   2 -10  14 12706.1 1325.64  -2
   2  10 -16 12706.1 1325.64   1
   2 -10  13 15661.8 1455.76  -2
   2  10 -15 15661.8 1455.76   1
   2 -10  12 4746.77 1204.98  -2
   2  10 -14 4746.77 1204.98   1
   2 -10  11 13137.0 1442.23  -2
   2  10 -13 13137.0 1442.23   1
   2 -10  10 40351.7 2275.61  -2
   2  10 -12 40351.7 2275.61   1
  -2 -10  -9 38969.0 2606.11  -2
  -2  10  11 38969.0 2606.11   1
   2 -10   8 156178. 9122.69  -2
   2  10 -10 156178. 9122.69   1
  -2  10  -7 4294.74 1273.59  -2
  -2 -10   9 4294.74 1273.59   1
  -2  10  -6 154455. 4672.07  -2
  -2 -10   8 154455. 4672.07   1
  -2  10  -5 519.247 1307.86  -2
  -2 -10   7 519.247 1307.86   1
  -2 -10  -4 198600. 4823.61  -2
  -2  10   6 198600. 4823.61   1
   2  10   3 23892.8 1969.37  -2
   2 -10  -5 23892.8 1969.37   1
   2  10   2 137090. 3917.69  -2
   2 -10  -4 137090. 3917.69   1
   2 -10   1 102232. 3189.89  -2
   2  10  -3 102232. 3189.89   1
   2 -10   0 26302.3 2245.22  -2
   2  10  -2 26302.3 2245.22   1
   2  10  -1 49979.5 2620.60  -2
   2 -10  -1 49979.5 2620.60   1
   2 -10  -2 15933.1 1662.34  -2
   2  10   0 15933.1 1662.34   1
   2 -10  -3 94579.0 3364.66  -2
   2  10   1 94579.0 3364.66   1
   2 -10  -4 157211. 4420.97  -2
   2  10   2 157211. 4420.97   1
   2 -10  -5 26632.4 2209.89  -2
   2  10   3 26632.4 2209.89   1
   2 -10  -6 211664. 5389.77  -2
   2  10   4 211664. 5389.77   1
   2 -10  -7 349.118 758.424  -2
   2  10   5 349.118 758.424   1
   2  10  -8 128628. 4648.20  -2
   2 -10   6 128628. 4648.20   1
  -2 -10   9 5583.79 1808.87  -2
  -2  10  -7 5583.79 1808.87   1
  -2 -10  10 125095. 4817.52  -2
  -2  10  -8 125095. 4817.52   1
   2  10 -11 68293.0 3703.75  -2
   2 -10   9 68293.0 3703.75   1
  -2 -10  12 55598.0 2872.74  -2
  -2  10 -10 55598.0 2872.74   1
  -2 -10  13 26046.3 1730.40  -2
  -2  10 -11 26046.3 1730.40   1
  -2 -10  14 9445.50 1257.57  -2
  -2  10 -12 9445.50 1257.57   1
  -2 -10  15 24502.3 1629.91  -2
  -2  10 -13 24502.3 1629.91   1
  -2 -10  16 7347.38 1212.16  -2
  -2  10 -14 7347.38 1212.16   1
  -2 -10  17 25073.7 1525.93  -2
  -2  10 -15 25073.7 1525.93   1
  -2 -10  18 26123.8 1394.98  -2
  -2  10 -16 26123.8 1394.98   1
  -2 -10  19 11328.2 982.573  -2
  -2  10 -17 11328.2 982.573   1
  -2 -10  20 26171.6 1357.33  -2
  -2  10 -18 26171.6 1357.33   1
  -2 -10  21 3172.66 606.329  -2
  -2  10 -19 3172.66 606.329   1
  -2 -10  22 31114.0 2370.19  -2
  -2  10 -20 31114.0 2370.19   1
   2 -11  19 5831.55 603.465  -2
   2  11 -21 5831.55 603.465   1
   2 -11  18 18744.7 910.129  -2
   2  11 -20 18744.7 910.129   1
   2 -11  17 3243.86 806.467  -2
   2  11 -19 3243.86 806.467   1
   2 -11  16 75442.7 2171.06  -2
   2  11 -18 75442.7 2171.06   1
   2 -11  15 17167.8 1290.25  -2
   2  11 -17 17167.8 1290.25   1
   2 -11  14 135783. 2864.97  -2
   2  11 -16 135783. 2864.97   1
   2 -11  13 19090.1 1476.01  -2
   2  11 -15 19090.1 1476.01   1
   2 -11  12 141827. 3114.77  -2
   2  11 -14 141827. 3114.77   1
   2 -11  11 20128.1 1364.54  -2
   2  11 -13 20128.1 1364.54   1
   2 -11  10 79522.7 3098.44  -2
   2  11 -12 79522.7 3098.44   1
   2 -11   9 35685.9 2120.21  -2
   2  11 -11 35685.9 2120.21   1
  -2  11  -8 19195.8 1944.15  -2
  -2 -11  10 19195.8 1944.15   1
  -2  11  -7 9795.75 1418.63  -2
  -2 -11   9 9795.75 1418.63   1
  -2  11  -6 1440.50 968.423  -2
  -2 -11   8 1440.50 968.423   1
   2 -11   5 3289.31 1287.71  -2
   2  11  -7 3289.31 1287.71   1
   2 -11   4 20680.5 2078.84  -2
   2  11  -6 20680.5 2078.84   1
  -2 -11  -3 20984.2 2095.64  -2
  -2  11   5 20984.2 2095.64   1
  -2  11  -2 123429. 3969.31  -2
  -2 -11   4 123429. 3969.31   1
   2 -11   1 19734.8 1757.77  -2
   2  11  -3 19734.8 1757.77   1
   2 -11   0 219677. 4930.60  -2
   2  11  -2 219677. 4930.60   1
   2  11  -1 17858.9 1883.02  -2
   2 -11  -1 17858.9 1883.02   1
   2 -11  -2 262931. 5592.43  -2
   2  11   0 262931. 5592.43   1
   2  11  -3 30520.3 2672.59  -2
   2 -11   1 30520.3 2672.59   1
  -2 -11   4 146216. 4449.49  -2
  -2  11  -2 146216. 4449.49   1
   2 -11  -5 46151.2 2984.86  -2
   2  11   3 46151.2 2984.86   1
   2  11  -6 29440.7 2439.67  -2
   2 -11   4 29440.7 2439.67   1
   2 -11  -7 8125.53 1799.32  -2
   2  11   5 8125.53 1799.32   1
   2 -11  -8 4359.88 1716.90  -2
   2  11   6 4359.88 1716.90   1
   2 -11  -9 13420.2 2103.60  -2
   2  11   7 13420.2 2103.60   1
   2 -11 -10 10115.7 1962.47  -2
   2  11   8 10115.7 1962.47   1
  -2 -11  11 24870.4 1776.77  -2
  -2  11  -9 24870.4 1776.77   1
  -2 -11  12 81609.6 2601.10  -2
  -2  11 -10 81609.6 2601.10   1
  -2 -11  13 13146.5 1384.20  -2
  -2  11 -11 13146.5 1384.20   1
  -2 -11  14 127257. 3021.99  -2
  -2  11 -12 127257. 3021.99   1
  -2 -11  15 18997.9 1625.84  -2
  -2  11 -13 18997.9 1625.84   1
  -2 -11  16 136600. 2797.82  -2
  -2  11 -14 136600. 2797.82   1
  -2 -11  17 17259.9 1303.96  -2
  -2  11 -15 17259.9 1303.96   1
  -2 -11  18 65731.2 1758.87  -2
  -2  11 -16 65731.2 1758.87   1
  -2 -11  19 4068.87 828.444  -2
  -2  11 -17 4068.87 828.444   1
  -2 -11  20 16576.2 894.225  -2
  -2  11 -18 16576.2 894.225   1
  -2 -11  21 10771.7 793.665  -2
  -2  11 -19 10771.7 793.665   1
  -2  11 -20 144.647 294.194   1
   2 -12  19 29919.5 2618.02  -2
   2  12 -21 29919.5 2618.02   1
   2 -12  18 42565.6 1114.11  -2
   2  12 -20 42565.6 1114.11   1
   2 -12  17 12830.6 922.036  -2
   2  12 -19 12830.6 922.036   1
   2 -12  16 43775.3 1512.87  -2
   2  12 -18 43775.3 1512.87   1
   2 -12  15 3527.55 969.673  -2
   2  12 -17 3527.55 969.673   1
   2 -12  14 23416.4 1454.08  -2
   2  12 -16 23416.4 1454.08   1
   2  12  13 3949.47 1094.58  -2
   2 -12 -15 3949.47 1094.58   1
   2  12  12 5505.11 1196.48  -2
   2 -12 -14 5505.11 1196.48   1
   2 -12  11 9964.87 1716.30  -2
   2  12 -13 9964.87 1716.30   1
   2 -12  10 38724.9 2077.22  -2
   2  12 -12 38724.9 2077.22   1
   2 -12   9 20104.5 2359.78  -2
   2  12 -11 20104.5 2359.78   1
   2 -12   8 142964. 3283.01  -2
   2  12 -10 142964. 3283.01   1
   2 -12   7 141121. 5085.55  -2
   2  12  -9 141121. 5085.55   1
   2 -12   6 162605. 6058.71  -2
   2  12  -8 162605. 6058.71   1
   2 -12   5 94499.8 3878.44  -2
   2  12  -7 94499.8 3878.44   1
   2 -12   4 204356. 5763.33  -2
   2  12  -6 204356. 5763.33   1
   2 -12   3 53138.4 2871.65  -2
   2  12  -5 53138.4 2871.65   1
  -2 -12  -2 103781. 29728.7  -2
  -2  12   4 103781. 29728.7   1
  -2  12  -1 7083.08 1755.76  -2
  -2 -12   3 7083.08 1755.76   1
   2 -12   0 29491.6 5508.64  -2
   2  12  -2 29491.6 5508.64   1
   2 -12  -1 14668.7 11002.1  -2
   2  12  -1 14668.7 11002.1   1
   2 -12  -2 14632.3 3480.06  -2
   2  12   0 14632.3 3480.06   1
   2 -12  -3 5760.72 1554.45  -2
   2  12   1 5760.72 1554.45   1
   2 -12  -4 113253. 4375.59  -2
   2  12   2 113253. 4375.59   1
   2 -12  -5 70769.8 5841.35  -2
   2  12   3 70769.8 5841.35   1
   2 -12  -6 189019. 22721.6  -2
   2  12   4 189019. 22721.6   1
   2 -12  -7 92570.2 11091.1  -2
   2  12   5 92570.2 11091.1   1
   2  12  -8 166859. 8540.93  -2
   2 -12   6 166859. 8540.93   1
   2  12  -9 85566.8 10708.5  -2
   2 -12   7 85566.8 10708.5   1
   2 -12 -10 179995. 3685.54  -2
   2  12   8 179995. 3685.54   1
  -2  12  11 23053.5 1630.04  -2
  -2 -12  -9 23053.5 1630.04   1
  -2  12  12 62056.8 2264.02  -2
  -2 -12 -10 62056.8 2264.02   1
  -2 -12  13 19956.8 1523.17  -2
  -2  12 -11 19956.8 1523.17   1
  -2 -12  14 9071.84 1266.85  -2
  -2  12 -12 9071.84 1266.85   1
  -2 -12  15 3293.91 1073.59  -2
  -2  12 -13 3293.91 1073.59   1
  -2 -12  16 11222.3 1242.74  -2
  -2  12 -14 11222.3 1242.74   1
  -2 -12  17 3905.37 989.169  -2
  -2  12 -15 3905.37 989.169   1
  -2 -12  18 21256.3 1267.89  -2
  -2  12 -16 21256.3 1267.89   1
  -2 -12  19 11582.2 920.123  -2
  -2  12 -17 11582.2 920.123   1
  -2 -12  20 30164.6 1070.33  -2
  -2  12 -18 30164.6 1070.33   1
  -2 -12  21 20207.2 1595.70  -2
  -2  12 -19 20207.2 1595.70   1
   2 -13  18 10264.5 1310.04  -2
   2  13 -20 10264.5 1310.04   1
   2 -13  17 33032.4 1483.81  -2
   2  13 -19 33032.4 1483.81   1
   2 -13  16 19219.2 1114.63  -2
   2  13 -18 19219.2 1114.63   1
   2 -13  15 33330.6 1730.16  -2
   2  13 -17 33330.6 1730.16   1
   2 -13  14 65445.7 2073.67  -2
   2  13 -16 65445.7 2073.67   1
   2  13  13 53808.9 2253.38  -2
   2 -13 -15 53808.9 2253.38   1
   2  13  12 77107.1 2379.52  -2
   2 -13 -14 77107.1 2379.52   1
   2  13  11 37694.8 2174.35  -2
   2 -13 -13 37694.8 2174.35   1
   2 -13  10 58244.9 2102.96  -2
   2  13 -12 58244.9 2102.96   1
   2 -13   9 40765.3 2182.24  -2
   2  13 -11 40765.3 2182.24   1
   2 -13   8 20555.8 1730.55  -2
   2  13 -10 20555.8 1730.55   1
   2 -13   7 7048.39 1145.90  -2
   2  13  -9 7048.39 1145.90   1
   2 -13   6 32270.2 2153.55  -2
   2  13  -8 32270.2 2153.55   1
   2 -13   5 33032.9 2539.88  -2
   2  13  -7 33032.9 2539.88   1
  -2 -13  -4 21189.0 2226.89  -2
  -2  13   6 21189.0 2226.89   1
   2 -13   3 21685.3 2858.01  -2
   2  13  -5 21685.3 2858.01   1
  -2  13  -2 57177.5 6162.75  -2
  -2 -13   4 57177.5 6162.75   1
  -2 -13  -1 85701.7 16520.2  -2
  -2  13   3 85701.7 16520.2   1
  -2 -13   0 83389.9 12253.0  -2
  -2  13   2 83389.9 12253.0   1
  -2 -13   1 77584.1 36677.8  -2
  -2  13   1 77584.1 36677.8   1
  -2 -13   2 107880. 13504.6  -2
  -2  13   0 107880. 13504.6   1
  -2 -13   3 104966. 5063.23  -2
  -2  13  -1 104966. 5063.23   1
   2 -13  -4 89458.7 4838.69  -2
   2  13   2 89458.7 4838.69   1
   2 -13  -5 29798.0 3157.07  -2
   2  13   3 29798.0 3157.07   1
   2 -13  -6 56797.5 3426.00  -2
   2  13   4 56797.5 3426.00   1
   2 -13  -7 16069.8 4582.83  -2
   2  13   5 16069.8 4582.83   1
   2  13  -8 53146.0 3335.43  -2
   2 -13   6 53146.0 3335.43   1
  -2  13   9 14705.4 1475.95  -2
  -2 -13  -7 14705.4 1475.95   1
  -2 -13  10 9678.59 1435.55  -2
  -2  13  -8 9678.59 1435.55   1
  -2  13  11 43113.8 2046.72  -2
  -2 -13  -9 43113.8 2046.72   1
  -2 -13  12 33777.5 1751.19  -2
  -2  13 -10 33777.5 1751.19   1
  -2 -13  13 41957.7 1824.81  -2
  -2  13 -11 41957.7 1824.81   1
  -2 -13  14 55225.5 2162.23  -2
  -2  13 -12 55225.5 2162.23   1
  -2 -13  15 57663.6 2125.75  -2
  -2  13 -13 57663.6 2125.75   1
  -2 -13  16 51195.8 1954.86  -2
  -2  13 -14 51195.8 1954.86   1
  -2 -13  17 24273.0 1375.37  -2
  -2  13 -15 24273.0 1375.37   1
  -2 -13  18 21799.2 1176.12  -2
  -2  13 -16 21799.2 1176.12   1
  -2 -13  19 19042.0 1501.41  -2
  -2  13 -17 19042.0 1501.41   1
  -2 -13  20 18398.6 781.378  -2
  -2  13 -18 18398.6 781.378   1
   2 -14  18 4568.76 512.822  -2
   2  14 -20 4568.76 512.822   1
   2 -14  17 15681.6 1134.37  -2
   2  14 -19 15681.6 1134.37   1
   2 -14  16 25885.5 1150.28  -2
   2  14 -18 25885.5 1150.28   1
   2 -14  15 6299.79 935.714  -2
   2  14 -17 6299.79 935.714   1
   2  14  14 36976.1 1514.18  -2
   2 -14 -16 36976.1 1514.18   1
   2  14  13 1425.46 949.161  -2
   2 -14 -15 1425.46 949.161   1
   2 -14  12 25296.8 1542.27  -2
   2  14 -14 25296.8 1542.27   1
   2 -14  11 10135.8 1320.66  -2
   2  14 -13 10135.8 1320.66   1
   2  14  10 14419.0 1441.60  -2
   2 -14 -12 14419.0 1441.60   1
   2 -14   9 34368.0 1754.21  -2
   2  14 -11 34368.0 1754.21   1
   2 -14   8 20305.1 1631.59  -2
   2  14 -10 20305.1 1631.59   1
   2 -14   7 79526.9 2709.04  -2
   2  14  -9 79526.9 2709.04   1
   2 -14   6 29046.8 1880.88  -2
   2  14  -8 29046.8 1880.88   1
   2 -14   5 58953.1 2501.26  -2
   2  14  -7 58953.1 2501.26   1
  -2  14  -4 59914.6 15355.2  -2
  -2 -14   6 59914.6 15355.2   1
   2 -14   3 28799.2 2423.49  -2
   2  14  -5 28799.2 2423.49   1
   2 -14   2 50113.9 13407.0  -2
   2  14  -4 50113.9 13407.0   1
  -2 -14  -1 16779.6 3507.84  -2
  -2  14   3 16779.6 3507.84   1
  -2 -14   0 43383.0 23435.5  -2
  -2  14   2 43383.0 23435.5   1
  -2 -14   1 19842.3 6967.01  -2
  -2  14   1 19842.3 6967.01   1
  -2 -14   2 41764.0 3503.25  -2
  -2  14   0 41764.0 3503.25   1
  -2 -14   3 33510.2 7740.16  -2
  -2  14  -1 33510.2 7740.16   1
   2 -14  -4 24689.6 2905.81  -2
   2  14   2 24689.6 2905.81   1
   2 -14  -5 49387.6 3983.29  -2
   2  14   3 49387.6 3983.29   1
   2 -14  -6 33673.2 3103.22  -2
   2  14   4 33673.2 3103.22   1
  -2  14   7 73816.9 2705.86  -2
  -2 -14  -5 73816.9 2705.86   1
  -2  14   8 22892.5 1606.65  -2
  -2 -14  -6 22892.5 1606.65   1
  -2 -14   9 65567.7 2530.81  -2
  -2  14  -7 65567.7 2530.81   1
  -2  14  10 36970.5 1843.76  -2
  -2 -14  -8 36970.5 1843.76   1
  -2  14  11 22723.2 1604.47  -2
  -2 -14  -9 22723.2 1604.47   1
  -2 -14  12 28270.8 1620.04  -2
  -2  14 -10 28270.8 1620.04   1
  -2 -14  13 5706.17 1104.48  -2
  -2  14 -11 5706.17 1104.48   1
  -2 -14  14 36560.7 1698.08  -2
  -2  14 -12 36560.7 1698.08   1
  -2 -14  15 3998.56 1075.99  -2
  -2  14 -13 3998.56 1075.99   1
  -2 -14  16 36710.9 1629.61  -2
  -2  14 -14 36710.9 1629.61   1
  -2 -14  17 13860.6 1113.41  -2
  -2  14 -15 13860.6 1113.41   1
  -2 -14  18 22233.9 1128.89  -2
  -2  14 -16 22233.9 1128.89   1
  -2 -14  19 27533.5 1013.75  -2
  -2  14 -17 27533.5 1013.75   1
  -2 -14  20 2450.59 506.502  -2
  -2  14 -18 2450.59 506.502   1
   2 -15  17 8674.23 652.917  -2
   2  15 -19 8674.23 652.917   1
   2 -15  16 2859.08 872.129  -2
   2  15 -18 2859.08 872.129   1
   2 -15  15 11410.4 964.419  -2
   2  15 -17 11410.4 964.419   1
   2  15  14 1259.39 812.482  -2
   2 -15 -16 1259.39 812.482   1
   2  15  13 5745.16 1011.26  -2
   2 -15 -15 5745.16 1011.26   1
   2 -15  12 5538.34 1080.22  -2
   2  15 -14 5538.34 1080.22   1
   2  15  11 12488.3 1325.92  -2
   2 -15 -13 12488.3 1325.92   1
   2  15  10 20791.9 1441.44  -2
   2 -15 -12 20791.9 1441.44   1
   2  15   9 17384.8 1406.63  -2
   2 -15 -11 17384.8 1406.63   1
   2 -15   8 22094.6 1489.31  -2
   2  15 -10 22094.6 1489.31   1
   2 -15   7 9695.04 1201.63  -2
   2  15  -9 9695.04 1201.63   1
   2 -15   6 27825.4 1589.97  -2
   2  15  -8 27825.4 1589.97   1
   2 -15   5 15811.8 1860.67  -2
   2  15  -7 15811.8 1860.67   1
   2 -15   4 28133.8 1583.32  -2
   2  15  -6 28133.8 1583.32   1
   2 -15   3 40233.2 2042.38  -2
   2  15  -5 40233.2 2042.38   1
   2 -15   2 26308.9 1959.24  -2
   2  15  -4 26308.9 1959.24   1
   2 -15   1 8930.63 1294.50  -2
   2  15  -3 8930.63 1294.50   1
  -2 -15   0 12333.1 1922.57  -2
  -2  15   2 12333.1 1922.57   1
   2 -15  -1 1330.67 1905.60  -2
   2  15  -1 1330.67 1905.60   1
   2 -15  -2 6018.24 2278.24  -2
   2  15   0 6018.24 2278.24   1
  -2  15   3 6763.48 1594.05  -2
  -2 -15  -1 6763.48 1594.05   1
  -2  15   4 35888.5 1991.71  -2
  -2 -15  -2 35888.5 1991.71   1
  -2  15   5 25887.5 1760.55  -2
  -2 -15  -3 25887.5 1760.55   1
  -2  15   6 47592.4 2040.80  -2
  -2 -15  -4 47592.4 2040.80   1
  -2 -15   7 9528.78 1411.15  -2
  -2  15  -5 9528.78 1411.15   1
  -2 -15   8 33898.3 2065.40  -2
  -2  15  -6 33898.3 2065.40   1
  -2  15   9 18418.1 1479.16  -2
  -2 -15  -7 18418.1 1479.16   1
  -2  15  10 27547.3 1871.81  -2
  -2 -15  -8 27547.3 1871.81   1
  -2  15  11 35582.0 1761.74  -2
  -2 -15  -9 35582.0 1761.74   1
  -2  15  12 24718.5 1627.67  -2
  -2 -15 -10 24718.5 1627.67   1
  -2  15  13 20135.0 1393.63  -2
  -2 -15 -11 20135.0 1393.63   1
  -2 -15  14 9847.05 1079.05  -2
  -2  15 -12 9847.05 1079.05   1
  -2 -15  15 5642.41 1069.82  -2
  -2  15 -13 5642.41 1069.82   1
  -2 -15  16 907.899 854.615  -2
  -2  15 -14 907.899 854.615   1
  -2 -15  17 11481.1 979.715  -2
  -2  15 -15 11481.1 979.715   1
  -2 -15  18 6180.40 765.759  -2
  -2  15 -16 6180.40 765.759   1
  -2 -15  19 3880.26 687.665  -2
  -2  15 -17 3880.26 687.665   1
   2 -16  16 10027.8 1115.98  -2
   2  16 -18 10027.8 1115.98   1
   2 -16  15 392.007 665.841  -2
   2  16 -17 392.007 665.841   1
   2 -16  14 20627.1 1105.44  -2
   2  16 -16 20627.1 1105.44   1
   2  16  13 1375.42 849.239  -2
   2 -16 -15 1375.42 849.239   1
   2 -16  12 47700.1 1830.48  -2
   2  16 -14 47700.1 1830.48   1
   2 -16  11 5695.79 1088.18  -2
   2  16 -13 5695.79 1088.18   1
   2  16  10 37155.2 1703.28  -2
   2 -16 -12 37155.2 1703.28   1
   2  16   9 4238.07 1063.73  -2
   2 -16 -11 4238.07 1063.73   1
   2  16   8 7309.84 1151.39  -2
   2 -16 -10 7309.84 1151.39   1
   2  16   7 1160.29 979.985  -2
   2 -16  -9 1160.29 979.985   1
   2 -16   6 1688.41 946.258  -2
   2  16  -8 1688.41 946.258   1
   2 -16   5 1471.86 932.948  -2
   2  16  -7 1471.86 932.948   1
   2 -16   4 3816.85 1111.69  -2
   2  16  -6 3816.85 1111.69   1
   2 -16   3 693.987 996.461  -2
   2  16  -5 693.987 996.461   1
   2 -16   2 23414.7 2262.40  -2
   2  16  -4 23414.7 2262.40   1
   2 -16   1 5227.42 1436.15  -2
   2  16  -3 5227.42 1436.15   1
  -2  16   0 105821. 3112.30  -2
  -2 -16   2 105821. 3112.30   1
   2 -16  -1 23887.2 1822.66  -2
   2  16  -1 23887.2 1822.66   1
  -2  16   2 114546. 3440.33  -2
  -2 -16   0 114546. 3440.33   1
  -2  16   3 5900.47 1447.07  -2
  -2 -16  -1 5900.47 1447.07   1
  -2  16   4 54262.7 2381.13  -2
  -2 -16  -2 54262.7 2381.13   1
  -2  16   5 1298.57 1145.81  -2
  -2 -16  -3 1298.57 1145.81   1
  -2  16   6 5408.41 1144.79  -2
  -2 -16  -4 5408.41 1144.79   1
  -2  16   7 4063.08 1104.62  -2
  -2 -16  -5 4063.08 1104.62   1
  -2 -16   8 3396.44 1086.98  -2
  -2  16  -6 3396.44 1086.98   1
  -2  16   9 1785.15 1025.93  -2
  -2 -16  -7 1785.15 1025.93   1
  -2  16  10 3273.70 1240.23  -2
  -2 -16  -8 3273.70 1240.23   1
  -2 -16  11 7223.19 1177.83  -2
  -2  16  -9 7223.19 1177.83   1
  -2  16  12 31967.1 1743.24  -2
  -2 -16 -10 31967.1 1743.24   1
  -2 -16  13 11751.5 1165.68  -2
  -2  16 -11 11751.5 1165.68   1
  -2  16  14 57861.4 1754.83  -2
  -2 -16 -12 57861.4 1754.83   1
  -2 -16  15 3489.96 866.219  -2
  -2  16 -13 3489.96 866.219   1
  -2 -16  16 35187.1 1371.81  -2
  -2  16 -14 35187.1 1371.81   1
  -2 -16  17 717.003 690.441  -2
  -2  16 -15 717.003 690.441   1
  -2 -16  18 21537.7 887.560  -2
  -2  16 -16 21537.7 887.560   1
   2 -17  16 237.407 357.935  -2
   2  17 -18 237.407 357.935   1
   2 -17  15 12093.7 787.144  -2
   2  17 -17 12093.7 787.144   1
   2  17  14 1081.20 676.345  -2
   2 -17 -16 1081.20 676.345   1
   2 -17  13 20490.3 1148.74  -2
   2  17 -15 20490.3 1148.74   1
   2 -17  12 6124.71 1043.80  -2
   2  17 -14 6124.71 1043.80   1
   2 -17  11 22970.3 1372.42  -2
   2  17 -13 22970.3 1372.42   1
   2  17  10 33166.6 1615.24  -2
   2 -17 -12 33166.6 1615.24   1
   2 -17   9 32286.4 1605.47  -2
   2  17 -11 32286.4 1605.47   1
   2 -17   8 29616.5 1563.95  -2
   2  17 -10 29616.5 1563.95   1
   2 -17   7 13222.2 1279.17  -2
   2  17  -9 13222.2 1279.17   1
   2 -17   6 17322.9 1365.12  -2
   2  17  -8 17322.9 1365.12   1
   2  17   5 5159.90 1077.91  -2
   2 -17  -7 5159.90 1077.91   1
   2 -17   4 15835.9 1457.82  -2
   2  17  -6 15835.9 1457.82   1
   2  17   3 13862.7 1727.69  -2
   2 -17  -5 13862.7 1727.69   1
   2 -17   2 17919.2 1367.93  -2
   2  17  -4 17919.2 1367.93   1
  -2  17  -1 59953.9 1999.37  -2
  -2 -17   3 59953.9 1999.37   1
  -2  17   0 24445.1 1515.83  -2
  -2 -17   2 24445.1 1515.83   1
   2  17  -1 14959.4 1318.09  -2
   2 -17  -1 14959.4 1318.09   1
  -2  17   2 12815.3 1873.55  -2
  -2 -17   0 12815.3 1873.55   1
  -2  17   3 65066.7 2364.45  -2
  -2 -17  -1 65066.7 2364.45   1
  -2  17   4 12490.6 1393.28  -2
  -2 -17  -2 12490.6 1393.28   1
  -2  17   5 24213.0 1611.10  -2
  -2 -17  -3 24213.0 1611.10   1
  -2  17   6 13455.6 1353.53  -2
  -2 -17  -4 13455.6 1353.53   1
  -2  17   7 7667.05 1223.52  -2
  -2 -17  -5 7667.05 1223.52   1
  -2  17   8 25980.9 1638.95  -2
  -2 -17  -6 25980.9 1638.95   1
  -2  17   9 6115.36 1143.67  -2
  -2 -17  -7 6115.36 1143.67   1
  -2 -17  10 45334.8 1943.38  -2
  -2  17  -8 45334.8 1943.38   1
  -2  17  11 17937.4 1407.04  -2
  -2 -17  -9 17937.4 1407.04   1
  -2  17  12 57634.2 2015.48  -2
  -2 -17 -10 57634.2 2015.48   1
  -2 -17  13 14100.2 1359.33  -2
  -2  17 -11 14100.2 1359.33   1
  -2  17  14 11857.1 1001.44  -2
  -2 -17 -12 11857.1 1001.44   1
  -2 -17  15 17323.0 1037.66  -2
  -2  17 -13 17323.0 1037.66   1
  -2 -17  16 339.813 563.462  -2
  -2  17 -14 339.813 563.462   1
  -2 -17  17 10028.2 783.285  -2
  -2  17 -15 10028.2 783.285   1
  -2 -17  18 256.916 475.742  -2
  -2  17 -16 256.916 475.742   1
   2 -18  15 5823.50 573.782  -2
   2  18 -17 5823.50 573.782   1
   2 -18  14 6104.76 793.807  -2
   2  18 -16 6104.76 793.807   1
   2  18  13 1971.72 688.935  -2
   2 -18 -15 1971.72 688.935   1
   2  18  12 21351.6 1164.66  -2
   2 -18 -14 21351.6 1164.66   1
   2  18  11 18567.2 1332.33  -2
   2 -18 -13 18567.2 1332.33   1
   2 -18  10 20037.2 1334.08  -2
   2  18 -12 20037.2 1334.08   1
   2  18   9 38986.6 1592.79  -2
   2 -18 -11 38986.6 1592.79   1
   2 -18   8 1827.31 896.386  -2
   2  18 -10 1827.31 896.386   1
   2 -18   7 77828.1 2282.38  -2
   2  18  -9 77828.1 2282.38   1
   2  18   6 298.108 923.678  -2
   2 -18  -8 298.108 923.678   1
   2  18   5 81417.1 2410.51  -2
   2 -18  -7 81417.1 2410.51   1
   2  18   4 1783.41 959.867  -2
   2 -18  -6 1783.41 959.867   1
   2  18   3 69348.6 4462.34  -2
   2 -18  -5 69348.6 4462.34   1
   2  18   2 17358.8 1384.46  -2
   2 -18  -4 17358.8 1384.46   1
   2  18   1 23619.8 1442.84  -2
   2 -18  -3 23619.8 1442.84   1
  -2  18   0 57496.7 2012.15  -2
  -2 -18   2 57496.7 2012.15   1
  -2  18   1 13034.6 1265.91  -2
  -2 -18   1 13034.6 1265.91   1
  -2  18   2 51177.1 2049.47  -2
  -2 -18   0 51177.1 2049.47   1
  -2  18   3 15212.5 1946.31  -2
  -2 -18  -1 15212.5 1946.31   1
  -2  18   4 27545.2 2541.69  -2
  -2 -18  -2 27545.2 2541.69   1
  -2  18   5 55473.7 2165.84  -2
  -2 -18  -3 55473.7 2165.84   1
  -2  18   6 3912.86 1065.33  -2
  -2 -18  -4 3912.86 1065.33   1
  -2  18   7 77480.4 2696.23  -2
  -2 -18  -5 77480.4 2696.23   1
  -2  18   8 637.291 837.564  -2
  -2 -18  -6 637.291 837.564   1
  -2 -18   9 88161.0 2456.39  -2
  -2  18  -7 88161.0 2456.39   1
  -2 -18  10 1550.24 923.205  -2
  -2  18  -8 1550.24 923.205   1
  -2  18  11 34277.4 1753.35  -2
  -2 -18  -9 34277.4 1753.35   1
  -2 -18  12 20385.4 1288.62  -2
  -2  18 -10 20385.4 1288.62   1
  -2 -18  13 25888.6 1245.69  -2
  -2  18 -11 25888.6 1245.69   1
  -2 -18  14 28296.8 1426.86  -2
  -2  18 -12 28296.8 1426.86   1
   2  18  13 3255.81 435.485   1
  -2  18  15 3795.40 750.512  -2
  -2 -18 -13 3795.40 750.512   1
  -2 -18  16 13480.1 835.055  -2
  -2  18 -14 13480.1 835.055   1
  -2 -18  17 2826.02 541.323  -2
  -2  18 -15 2826.02 541.323   1
   2 -19  14 3001.15 506.139  -2
   2  19 -16 3001.15 506.139   1
   2 -19  13 59121.8 1303.96  -2
   2  19 -15 59121.8 1303.96   1
   2  19  12 4958.30 751.464  -2
   2 -19 -14 4958.30 751.464   1
   2  19  11 88063.9 1819.42  -2
   2 -19 -13 88063.9 1819.42   1
   2  19  10 6772.67 939.056  -2
   2 -19 -12 6772.67 939.056   1
   2 -19   9 60034.5 1754.20  -2
   2  19 -11 60034.5 1754.20   1
   2  19   8 3050.70 877.047  -2
   2 -19 -10 3050.70 877.047   1
   2 -19   7 14297.6 1185.77  -2
   2  19  -9 14297.6 1185.77   1
   2 -19   6 1375.51 852.011  -2
   2  19  -8 1375.51 852.011   1
   2 -19   5 7458.80 1085.63  -2
   2  19  -7 7458.80 1085.63   1
   2  19   4 776.882 883.342  -2
   2 -19  -6 776.882 883.342   1
   2  19   3 49792.1 1925.62  -2
   2 -19  -5 49792.1 1925.62   1
   2  19   2 4656.22 1039.00  -2
   2 -19  -4 4656.22 1039.00   1
   2 -19   1 116446. 2597.60  -2
   2  19  -3 116446. 2597.60   1
  -2  19   0 6388.19 1060.46  -2
  -2 -19   2 6388.19 1060.46   1
   2 -19  -1 138051. 3174.90  -2
   2  19  -1 138051. 3174.90   1
  -2  19   2 5673.69 1105.80  -2
  -2 -19   0 5673.69 1105.80   1
   2 -19  -3 137410. 3080.71  -2
   2  19   1 137410. 3080.71   1
  -2  19   4 3625.02 1330.06  -2
  -2 -19  -2 3625.02 1330.06   1
  -2  19   5 57094.3 2139.31  -2
  -2 -19  -3 57094.3 2139.31   1
  -2  19   6 1080.76 975.612  -2
  -2 -19  -4 1080.76 975.612   1
  -2  19   7 15414.9 1319.97  -2
  -2 -19  -5 15414.9 1319.97   1
  -2 -19   8 1498.96 923.136  -2
  -2  19  -6 1498.96 923.136   1
  -2  19   9 7587.07 1101.71  -2
  -2 -19  -7 7587.07 1101.71   1
  -2  19  10 2591.10 930.236  -2
  -2 -19  -8 2591.10 930.236   1
  -2  19  11 41009.0 1607.60  -2
  -2 -19  -9 41009.0 1607.60   1
  -2 -19  12 4594.13 851.509  -2
  -2  19 -10 4594.13 851.509   1
  -2  19  13 55384.0 1521.38  -2
  -2 -19 -11 55384.0 1521.38   1
  -2 -19  14 3600.64 669.362  -2
  -2  19 -12 3600.64 669.362   1
  -2  19  15 56415.9 1177.99  -2
  -2 -19 -13 56415.9 1177.99   1
  -2 -19  16 1602.56 494.053  -2
  -2  19 -14 1602.56 494.053   1
   2 -20  12 1595.30 543.057  -2
   2  20 -14 1595.30 543.057   1
   2  20  11 10059.6 780.597  -2
   2 -20 -13 10059.6 780.597   1
   2  20  10 14021.3 952.292  -2
   2 -20 -12 14021.3 952.292   1
   2  20   9 51195.6 1572.67  -2
   2 -20 -11 51195.6 1572.67   1
   2  20   8 12222.9 992.015  -2
   2 -20 -10 12222.9 992.015   1
   2  20   7 93352.6 2147.54  -2
   2 -20  -9 93352.6 2147.54   1
   2  20   6 13853.9 1052.34  -2
   2 -20  -8 13853.9 1052.34   1
   2  20   5 125874. 2655.21  -2
   2 -20  -7 125874. 2655.21   1
   2  20   4 12137.0 1557.72  -2
   2 -20  -6 12137.0 1557.72   1
   2  20   3 43469.7 1759.00  -2
   2 -20  -5 43469.7 1759.00   1
   2  20   2 9236.86 1111.63  -2
   2 -20  -4 9236.86 1111.63   1
  -2  20  -1 19542.6 1190.56  -2
  -2 -20   3 19542.6 1190.56   1
   2 -20   0 1191.67 891.454  -2
   2  20  -2 1191.67 891.454   1
   2 -20  -1 6596.92 1009.99  -2
   2  20  -1 6596.92 1009.99   1
   2 -20  -2 2372.33 933.985  -2
   2  20   0 2372.33 933.985   1
   2 -20  -3 10352.9 1146.65  -2
   2  20   1 10352.9 1146.65   1
   2 -20  -4 6099.57 1301.69  -2
   2  20   2 6099.57 1301.69   1
   2 -20  -5 36116.7 2128.85  -2
   2  20   3 36116.7 2128.85   1
   2 -20  -6 7998.60 1203.27  -2
   2  20   4 7998.60 1203.27   1
  -2  20   7 120357. 2715.00  -2
  -2 -20  -5 120357. 2715.00   1
  -2 -20   8 34006.5 1626.66  -2
  -2  20  -6 34006.5 1626.66   1
  -2  20   9 86593.8 2011.67  -2
  -2 -20  -7 86593.8 2011.67   1
  -2  20  10 24922.5 1336.37  -2
  -2 -20  -8 24922.5 1336.37   1
  -2  20  11 66692.5 3044.61  -2
  -2 -20  -9 66692.5 3044.61   1
  -2 -20  12 13677.5 947.431  -2
  -2  20 -10 13677.5 947.431   1
   2 -20 -13 14252.7 839.654  -2
   2  20  11 14252.7 839.654   1
   2 -20 -14 452.763 422.408  -2
   2  20  12 452.763 422.408   1
  -2  20 -13 1655.38 397.017   1
   2  21  11 34212.8 870.036  -2
   2 -21 -13 34212.8 870.036   1
   2  21  10 11432.9 1706.86  -2
   2 -21 -12 11432.9 1706.86   1
   2  21   9 34983.5 2123.87  -2
   2 -21 -11 34983.5 2123.87   1
   2  21   8 7460.05 949.674  -2
   2 -21 -10 7460.05 949.674   1
   2  21   7 18665.2 1099.06  -2
   2 -21  -9 18665.2 1099.06   1
   2  21   6 3008.52 800.440  -2
   2 -21  -8 3008.52 800.440   1
   2 -21   5 4668.98 850.830  -2
   2  21  -7 4668.98 850.830   1
   2  21   4 6330.64 957.498  -2
   2 -21  -6 6330.64 957.498   1
   2  21   3 34062.8 3762.43  -2
   2 -21  -5 34062.8 3762.43   1
   2  21   2 50072.3 1828.24  -2
   2 -21  -4 50072.3 1828.24   1
  -2  21  -1 30395.1 1267.36  -2
  -2 -21   3 30395.1 1267.36   1
   2  21   0 34714.0 1569.78  -2
   2 -21  -2 34714.0 1569.78   1
   2 -21  -1 58111.5 1865.05  -2
   2  21  -1 58111.5 1865.05   1
   2 -21  -2 23004.5 1316.41  -2
   2  21   0 23004.5 1316.41   1
   2 -21  -3 63578.1 1956.15  -2
   2  21   1 63578.1 1956.15   1
  -2  21   4 25640.5 1393.20  -2
  -2 -21  -2 25640.5 1393.20   1
   2 -21  -5 55807.8 1868.05  -2
   2  21   3 55807.8 1868.05   1
  -2  21   6 3770.37 1003.22  -2
  -2 -21  -4 3770.37 1003.22   1
  -2  21   7 9866.07 1055.19  -2
  -2 -21  -5 9866.07 1055.19   1
  -2  21   8 1859.35 828.489  -2
  -2 -21  -6 1859.35 828.489   1
  -2  21   9 9202.78 958.904  -2
  -2 -21  -7 9202.78 958.904   1
  -2  21  10 16944.6 1039.39  -2
  -2 -21  -8 16944.6 1039.39   1
  -2 -21  11 16799.5 916.088  -2
  -2  21  -9 16799.5 916.088   1
  -2 -21  12 18314.0 875.663  -2
  -2  21 -10 18314.0 875.663   1
   2 -21 -13 23469.4 774.372  -2
   2  21  11 23469.4 774.372   1
   2  22  10 9077.96 824.114  -2
   2 -22 -12 9077.96 824.114   1
   2  22   9 7449.41 659.023  -2
   2 -22 -11 7449.41 659.023   1
   2  22   8 12092.3 840.269  -2
   2 -22 -10 12092.3 840.269   1
   2 -22   7 15474.8 840.611  -2
   2  22  -9 15474.8 840.611   1
   2  22   6 11920.8 1896.85  -2
   2 -22  -8 11920.8 1896.85   1
   2  22   5 15301.4 982.209  -2
   2 -22  -7 15301.4 982.209   1
   2  22   4 16228.6 1052.93  -2
   2 -22  -6 16228.6 1052.93   1
   2  22   3 6372.99 886.989  -2
   2 -22  -5 6372.99 886.989   1
   2  22   2 9221.07 1062.21  -2
   2 -22  -4 9221.07 1062.21   1
   2  22   1 17260.3 1502.19  -2
   2 -22  -3 17260.3 1502.19   1
  -2 -22   0 4408.47 800.656  -2
  -2  22   2 4408.47 800.656   1
  -2  22   1 24098.5 1178.32  -2
  -2 -22   1 24098.5 1178.32   1
   2 -22  -2 12551.3 990.273  -2
   2  22   0 12551.3 990.273   1
   2 -22  -3 13427.8 1047.87  -2
   2  22   1 13427.8 1047.87   1
   2 -22  -4 15020.5 1088.26  -2
   2  22   2 15020.5 1088.26   1
   2 -22  -5 3016.06 830.374  -2
   2  22   3 3016.06 830.374   1
  -2  22   6 15283.1 1071.02  -2
  -2 -22  -4 15283.1 1071.02   1
   2 -22  -7 11679.8 986.903  -2
   2  22   5 11679.8 986.903   1
  -2  22   8 20979.3 1100.08  -2
  -2 -22  -6 20979.3 1100.08   1
   2 -22  -9 10568.3 859.642  -2
   2  22   7 10568.3 859.642   1
  -2 -22  10 19245.4 922.920  -2
  -2  22  -8 19245.4 922.920   1
   2 -22 -11 12291.8 711.885  -2
   2  22   9 12291.8 711.885   1
  -2 -22  12 6977.50 526.850  -2
  -2  22 -10 6977.50 526.850   1
   2  23   8 3482.48 523.969  -2
   2 -23 -10 3482.48 523.969   1
   2  23   7 17068.6 817.148  -2
   2 -23  -9 17068.6 817.148   1
   2  23   6 11839.1 821.989  -2
   2 -23  -8 11839.1 821.989   1
   2  23   5 14875.3 836.219  -2
   2 -23  -7 14875.3 836.219   1
  -2 -23  -4 17700.8 911.489  -2
  -2  23   6 17700.8 911.489   1
  -2 -23  -3 19215.7 1208.98  -2
  -2  23   5 19215.7 1208.98   1
  -2 -23  -2 18629.3 1032.50  -2
  -2  23   4 18629.3 1032.50   1
  -2 -23  -1 4856.99 667.375  -2
  -2  23   3 4856.99 667.375   1
   2  23   0 15086.0 1026.06  -2
   2 -23  -2 15086.0 1026.06   1
   2 -23  -1 298.505 424.840  -2
   2  23  -1 298.505 424.840   1
  -2  23   2 9725.90 945.444  -2
  -2 -23   0 9725.90 945.444   1
  -2  23   3 7906.74 809.433  -2
  -2 -23  -1 7906.74 809.433   1
  -2  23   4 11555.7 942.211  -2
  -2 -23  -2 11555.7 942.211   1
  -2  23   5 19784.8 1030.56  -2
  -2 -23  -3 19784.8 1030.56   1
   2 -23  -6 19602.4 995.012  -2
   2  23   4 19602.4 995.012   1
   2 -23  -7 21519.9 1013.12  -2
   2  23   5 21519.9 1013.12   1
   2 -23  -8 18314.7 911.713  -2
   2  23   6 18314.7 911.713   1
  -2  23   9 23973.8 913.962  -2
  -2 -23  -7 23973.8 913.962   1
  -2  23  10 6580.59 559.982  -2
  -2 -23  -8 6580.59 559.982   1
  -2 -24  -5 3807.17 713.315  -2
  -2  24   7 3807.17 713.315   1
   2  24   4 4416.30 585.467  -2
   2 -24  -6 4416.30 585.467   1
  -2 -24  -3 12075.0 676.624  -2
  -2  24   5 12075.0 676.624   1
  -2 -24  -2 4961.41 585.069  -2
  -2  24   4 4961.41 585.069   1
   2  24   1 13482.4 791.644  -2
   2 -24  -3 13482.4 791.644   1
   2 -24   0 981.080 557.361  -2
   2  24  -2 981.080 557.361   1
  -2  24   1 2618.61 550.848  -2
  -2 -24   1 2618.61 550.848   1
  -2  24   2 336.802 381.154  -2
  -2 -24   0 336.802 381.154   1
  -2  24   3 10879.2 716.714  -2
  -2 -24  -1 10879.2 716.714   1
  -2  24   4 3804.28 593.326  -2
  -2 -24  -2 3804.28 593.326   1
  -2  24   5 16019.2 808.127  -2
  -2 -24  -3 16019.2 808.127   1
   2 -24  -6 2932.12 565.060  -2
   2  24   4 2932.12 565.060   1
  -2  24   7 8431.95 635.791  -2
  -2 -24  -5 8431.95 635.791   1
   3   0 -24 5486.45 446.427   1
   3   0 -23-231.204 490.922   1
   3   0  19 7994.07 900.394  -2
   3   0 -22 7994.07 900.394   1
   3   0  18 2355.24 971.693  -2
   3   0 -21 2355.24 971.693   1
   3   0  17 9604.74 1177.88  -2
   3   0 -20 9604.74 1177.88   1
   3   0  16 52.2653 610.249  -2
   3   0 -19 52.2653 610.249   1
   3   0  15 4842.62 1062.63  -2
   3   0 -18 4842.62 1062.63   1
   3   0  14 222.919 956.622  -2
   3   0 -17 222.919 956.622   1
   3   0  13 10023.7 1387.38  -2
   3   0 -16 10023.7 1387.38   1
  -3   0 -12 116.171 737.578  -2
  -3   0  15 116.171 737.578   1
  -3   0 -11 688.629 901.812  -2
  -3   0  14 688.629 901.812   1
  -3   0 -10 6780.16 2001.82  -2
  -3   0  13 6780.16 2001.82   1
  -3   0  -9 829.368 1425.24  -2
  -3   0  12 829.368 1425.24   1
  -3   0  -8 9525.52 1667.51  -2
  -3   0  11 9525.52 1667.51   1
   3   0   7 3531.52 1409.40  -2
   3   0 -10 3531.52 1409.40   1
   3   0   6 2518.70 1359.18  -2
   3   0  -9 2518.70 1359.18   1
  -3   0  -5 423.659 896.339  -2
  -3   0   8 423.659 896.339   1
   3   0   4 13469.4 1572.33  -2
   3   0  -7 13469.4 1572.33   1
   3   0  -6 193.931 266.537   1
   3   0   3 469.314 1191.38  -2
   3   0  -6 469.314 1191.38   1
   3   0  -5 251.949 340.314   1
   3   0   2 3151.35 1113.09  -2
   3   0  -5 3151.35 1113.09   1
   3   0   1 58415.4 2400.84  -2
   3   0  -4 58415.4 2400.84   1
   3   0   0 774.795 903.299  -2
   3   0  -3 774.795 903.299   1
   3   0  -1 16645.8 1053.68  -2
   3   0  -2 16645.8 1053.68   1
  -3   0   2 7653.64 875.563  -2
  -3   0   1 7653.64 875.563   1
  -3   0   3 646.972 670.248  -2
  -3   0   0 646.972 670.248   1
  -3   0   4 25741.7 1335.30  -2
  -3   0  -1 25741.7 1335.30   1
   3   0  -5 5657.11 1085.15  -2
   3   0   2 5657.11 1085.15   1
   3   0  -6 1257.21 983.990  -2
   3   0   3 1257.21 983.990   1
   3   0  -7 22602.7 1619.44  -2
   3   0   4 22602.7 1619.44   1
   3   0  -8-125.921 1157.71  -2
   3   0   5-125.921 1157.71   1
   3   0  -9 3574.88 1482.14  -2
   3   0   6 3574.88 1482.14   1
   3   0 -10 2723.89 1711.98  -2
   3   0   7 2723.89 1711.98   1
   3   0 -11 19440.7 2336.85  -2
   3   0   8 19440.7 2336.85   1
   3   0 -12 2040.62 2110.26  -2
   3   0   9 2040.62 2110.26   1
   3   0 -13 8207.09 2596.06  -2
   3   0  10 8207.09 2596.06   1
   3   0 -14-307.456 2312.32  -2
   3   0  11-307.456 2312.32   1
   3   0 -15 819.440 2450.24  -2
   3   0  12 819.440 2450.24   1
   3   0 -16 4867.04 1810.33  -2
   3   0  13 4867.04 1810.33   1
  -3   0  17-50.3357 1199.53  -2
  -3   0 -14-50.3357 1199.53   1
  -3   0  18 1979.80 1225.33  -2
  -3   0 -15 1979.80 1225.33   1
  -3   0  19 1917.77 1125.17  -2
  -3   0 -16 1917.77 1125.17   1
  -3   0  20 6501.21 1125.25  -2
  -3   0 -17 6501.21 1125.25   1
  -3   0  21 3401.65 954.044  -2
  -3   0 -18 3401.65 954.044   1
  -3   0  22 4136.07 849.647  -2
  -3   0 -19 4136.07 849.647   1
  -3   0  23 8209.60 767.705  -2
  -3   0 -20 8209.60 767.705   1
  -3   0  24 2995.95 531.918  -2
  -3   0 -21 2995.95 531.918   1
   3  -1 -24 1875.64 364.161   1
   3  -1 -23 6199.18 566.345   1
   3  -1  20 7852.35 778.003  -2
   3   1 -23 7852.35 778.003   1
   3  -1  19 16438.7 1039.56  -2
   3   1 -22 16438.7 1039.56   1
   3   1  18 9482.77 1480.38  -2
   3  -1 -21 9482.77 1480.38   1
   3   1  17 7872.54 1400.33  -2
   3  -1 -20 7872.54 1400.33   1
   3  -1  16 18619.3 1299.77  -2
   3   1 -19 18619.3 1299.77   1
   3   1  15 930.900 984.989  -2
   3  -1 -18 930.900 984.989   1
   3   1  14 3046.49 1155.01  -2
   3  -1 -17 3046.49 1155.01   1
   3  -1  13 7035.52 1226.33  -2
   3   1 -16 7035.52 1226.33   1
   3   1  12 11247.5 1385.82  -2
   3  -1 -15 11247.5 1385.82   1
   3  -1 -14-96.5850 1666.42   1
  -3  -1 -11 1688.36 1314.41  -2
  -3   1  14 1688.36 1314.41   1
  -3   1 -10 3514.24 1558.54  -2
  -3  -1  13 3514.24 1558.54   1
   3   1   9 28977.3 2282.61  -2
   3  -1 -12 28977.3 2282.61   1
  -3   1  -8 4742.37 1502.76  -2
  -3  -1  11 4742.37 1502.76   1
  -3  -1  -7 101288. 3056.02  -2
  -3   1  10 101288. 3056.02   1
   3  -1   6 37779.4 2411.85  -2
   3   1  -9 37779.4 2411.85   1
   3   1   5 64762.0 2568.32  -2
   3  -1  -8 64762.0 2568.32   1
   3   1   4 131190. 3194.24  -2
   3  -1  -7 131190. 3194.24   1
   3  -1  -6 7940.10 575.566   1
   3   1   3 13218.0 1503.51  -2
   3  -1  -6 13218.0 1503.51   1
   3  -1   2 48137.4 1984.11  -2
   3   1  -5 48137.4 1984.11   1
  -3   1  -1 11784.7 1098.06  -2
  -3  -1   4 11784.7 1098.06   1
   3   1   0 109579. 2067.46  -2
   3  -1  -3 109579. 2067.46   1
   3   1  -1 3980.02 856.908  -2
   3  -1  -2 3980.02 856.908   1
  -3  -1   2 5141.99 810.831  -2
  -3   1   1 5141.99 810.831   1
   3  -1  -3 55736.3 1369.66  -2
   3   1   0 55736.3 1369.66   1
   3  -1  -4 11845.0 961.631  -2
   3   1   1 11845.0 961.631   1
  -3   1   5 30231.1 1566.01  -2
  -3  -1  -2 30231.1 1566.01   1
   3  -1  -6 10752.0 1871.29  -2
   3   1   3 10752.0 1871.29   1
   3   1  -7 75169.2 3506.13  -2
   3  -1   4 75169.2 3506.13   1
   3   1  -8 102709. 3376.95  -2
   3  -1   5 102709. 3376.95   1
   3  -1  -9 24269.4 3127.92  -2
   3   1   6 24269.4 3127.92   1
   3  -1 -10 94636.1 6297.00  -2
   3   1   7 94636.1 6297.00   1
   3   1 -11 3286.16 1824.57  -2
   3  -1   8 3286.16 1824.57   1
   3   1 -12 33325.5 6089.22  -2
   3  -1   9 33325.5 6089.22   1
   3  -1 -13 3884.70 2414.88  -2
   3   1  10 3884.70 2414.88   1
   3  -1 -14 559.356 2096.84  -2
   3   1  11 559.356 2096.84   1
   3  -1 -15 18470.5 2266.16  -2
   3   1  12 18470.5 2266.16   1
  -3  -1  16 8735.44 1512.35  -2
  -3   1 -13 8735.44 1512.35   1
  -3   1  17 3420.51 1277.75  -2
  -3  -1 -14 3420.51 1277.75   1
  -3  -1  18 884.104 1080.93  -2
  -3   1 -15 884.104 1080.93   1
  -3   1  19 14483.6 1362.49  -2
  -3  -1 -16 14483.6 1362.49   1
  -3   1  20 11396.4 1203.75  -2
  -3  -1 -17 11396.4 1203.75   1
  -3   1  21 4582.19 995.186  -2
  -3  -1 -18 4582.19 995.186   1
  -3   1  22 18545.1 1054.75  -2
  -3  -1 -19 18545.1 1054.75   1
  -3   1  23 3512.50 1384.29  -2
  -3  -1 -20 3512.50 1384.29   1
  -3  -1 -21 5609.89 440.293   1
  -3  -1  24 7005.63 596.191  -2
  -3   1 -21 7005.63 596.191   1
   3   2 -24 652.897 378.788   1
   3  -2 -23 3787.06 513.570   1
   3  -2  20 5073.83 735.487  -2
   3   2 -23 5073.83 735.487   1
   3   2  19 5982.89 860.442  -2
   3  -2 -22 5982.89 860.442   1
   3  -2  18 7219.13 1615.33  -2
   3   2 -21 7219.13 1615.33   1
   3   2  17 41027.9 1480.76  -2
   3  -2 -20 41027.9 1480.76   1
   3  -2  16 24804.1 1501.02  -2
   3   2 -19 24804.1 1501.02   1
   3  -2  15 60500.2 1917.96  -2
   3   2 -18 60500.2 1917.96   1
   3  -2  14 64424.1 2286.17  -2
   3   2 -17 64424.1 2286.17   1
   3  -2  13 32349.5 1724.63  -2
   3   2 -16 32349.5 1724.63   1
   3   2  12 109533. 2644.27  -2
   3  -2 -15 109533. 2644.27   1
   3   2  11 26353.1 2132.05  -2
   3  -2 -14 26353.1 2132.05   1
   3   2  10 113536. 3964.85  -2
   3  -2 -13 113536. 3964.85   1
  -3   2  -9 25760.9 2064.42  -2
  -3  -2  12 25760.9 2064.42   1
   3   2   8 84996.4 3074.27  -2
   3  -2 -11 84996.4 3074.27   1
  -3  -2  -7 2225.83 1377.85  -2
  -3   2  10 2225.83 1377.85   1
  -3   2  -6 35778.4 2252.28  -2
  -3  -2   9 35778.4 2252.28   1
   3  -2   5 24772.2 1892.48  -2
   3   2  -8 24772.2 1892.48   1
   3   2   4 48801.0 2409.62  -2
   3  -2  -7 48801.0 2409.62   1
   3   2   3 125235. 2914.74  -2
   3  -2  -6 125235. 2914.74   1
   3   2   2 90635.7 2713.78  -2
   3  -2  -5 90635.7 2713.78   1
   3  -2   1 47958.0 1731.31  -2
   3   2  -4 47958.0 1731.31   1
   3   2   0 208301. 3008.97  -2
   3  -2  -3 208301. 3008.97   1
   3  -2  -1 103035. 1991.75  -2
   3   2  -2 103035. 1991.75   1
   3  -2  -2 174159. 2928.64  -2
   3   2  -1 174159. 2928.64   1
   3  -2  -3 145125. 1873.85  -2
   3   2   0 145125. 1873.85   1
   3   2  -4 87300.7 2144.08  -2
   3  -2   1 87300.7 2144.08   1
   3  -2  -5 66248.9 1980.29  -2
   3   2   2 66248.9 1980.29   1
   3   2  -6 221716. 3814.33  -2
   3  -2   3 221716. 3814.33   1
   3   2  -7 71749.6 2358.73  -2
   3  -2   4 71749.6 2358.73   1
   3  -2  -8 42963.2 2309.21  -2
   3   2   5 42963.2 2309.21   1
   3  -2  -9 18595.7 4492.06  -2
   3   2   6 18595.7 4492.06   1
   3   2 -10 2740.80 1402.22  -2
   3  -2   7 2740.80 1402.22   1
   3   2 -11 42376.0 2734.16  -2
   3  -2   8 42376.0 2734.16   1
   3   2 -12 48212.6 4707.03  -2
   3  -2   9 48212.6 4707.03   1
   3  -2 -13 56063.1 2645.65  -2
   3   2  10 56063.1 2645.65   1
   3  -2 -14 61042.0 3689.70  -2
   3   2  11 61042.0 3689.70   1
  -3  -2  15 60617.2 2138.86  -2
  -3   2 -12 60617.2 2138.86   1
  -3  -2  16 58535.2 2327.03  -2
  -3   2 -13 58535.2 2327.03   1
  -3  -2  17 35524.5 1719.20  -2
  -3   2 -14 35524.5 1719.20   1
  -3  -2  18 90706.8 2280.12  -2
  -3   2 -15 90706.8 2280.12   1
  -3   2  19 21515.4 1477.15  -2
  -3  -2 -16 21515.4 1477.15   1
  -3  -2  20 64571.8 5193.15  -2
  -3   2 -17 64571.8 5193.15   1
  -3   2  21 11691.4 1110.94  -2
  -3  -2 -18 11691.4 1110.94   1
  -3   2  22 4443.26 1015.87  -2
  -3  -2 -19 4443.26 1015.87   1
  -3  -2  23 3605.05 689.902  -2
  -3   2 -20 3605.05 689.902   1
  -3  -2  24 1583.70 543.395  -2
  -3   2 -21 1583.70 543.395   1
   3   3 -24 12628.6 569.538   1
   3  -3 -23 36817.1 823.359   1
   3  -3  20 50176.8 1216.63  -2
   3   3 -23 50176.8 1216.63   1
   3   3  19 48628.7 1293.98  -2
   3  -3 -22 48628.7 1293.98   1
   3   3  18 58586.5 2093.74  -2
   3  -3 -21 58586.5 2093.74   1
   3   3  17 57521.2 1687.65  -2
   3  -3 -20 57521.2 1687.65   1
   3  -3  16 36029.2 1529.69  -2
   3   3 -19 36029.2 1529.69   1
   3  -3  15 40047.3 1678.28  -2
   3   3 -18 40047.3 1678.28   1
   3  -3  14 25521.6 1510.58  -2
   3   3 -17 25521.6 1510.58   1
   3   3  13 5737.20 1272.00  -2
   3  -3 -16 5737.20 1272.00   1
   3   3  12 12927.5 1420.40  -2
   3  -3 -15 12927.5 1420.40   1
  -3  -3 -11 31094.4 2328.05  -2
  -3   3  14 31094.4 2328.05   1
  -3   3 -10 23831.4 2244.28  -2
  -3  -3  13 23831.4 2244.28   1
  -3  -3  -9 99641.6 3543.74  -2
  -3   3  12 99641.6 3543.74   1
  -3   3  -8 128815. 3865.71  -2
  -3  -3  11 128815. 3865.71   1
  -3  -3  -7 244124. 4993.25  -2
  -3   3  10 244124. 4993.25   1
   3   3   6 246831. 4425.44  -2
   3  -3  -9 246831. 4425.44   1
   3   3   5 220712. 5591.40  -2
   3  -3  -8 220712. 5591.40   1
  -3  -3  -4 340609. 6733.93  -2
  -3   3   7 340609. 6733.93   1
   3  -3   3 238581. 3329.17  -2
   3   3  -6 238581. 3329.17   1
   3   3   2 115263. 2845.71  -2
   3  -3  -5 115263. 2845.71   1
   3   3   1 69255.6 2071.11  -2
   3  -3  -4 69255.6 2071.11   1
   3   3   0 149120. 3155.54  -2
   3  -3  -3 149120. 3155.54   1
   3   3  -1 19226.8 1216.67  -2
   3  -3  -2 19226.8 1216.67   1
   3  -3  -2 30201.9 1480.38  -2
   3   3  -1 30201.9 1480.38   1
  -3  -3   3 112737. 2438.70  -2
  -3   3   0 112737. 2438.70   1
  -3   3  -1 26019.6 270.979   1
  -3   3   4 68722.8 2039.83  -2
  -3  -3  -1 68722.8 2039.83   1
   3   3  -5 74932.0 2133.60  -2
   3  -3   2 74932.0 2133.60   1
   3  -3  -6 229463. 3745.92  -2
   3   3   3 229463. 3745.92   1
   3  -3  -7 192811. 10896.7  -2
   3   3   4 192811. 10896.7   1
   3   3  -8 340421. 9288.25  -2
   3  -3   5 340421. 9288.25   1
   3   3  -9 167111. 3908.71  -2
   3  -3   6 167111. 3908.71   1
   3  -3 -10 308227. 5299.47  -2
   3   3   7 308227. 5299.47   1
   3  -3 -11 119033. 3238.63  -2
   3   3   8 119033. 3238.63   1
   3  -3 -12 122101. 4063.34  -2
   3   3   9 122101. 4063.34   1
   3  -3 -13 45014.1 5519.66  -2
   3   3  10 45014.1 5519.66   1
   3   3 -14 49263.2 3175.04  -2
   3  -3  11 49263.2 3175.04   1
  -3   3  15 14979.4 1447.86  -2
  -3  -3 -12 14979.4 1447.86   1
   3   3 -16 5305.61 1439.44  -2
   3  -3  13 5305.61 1439.44   1
  -3  -3  17 10592.3 1279.07  -2
  -3   3 -14 10592.3 1279.07   1
  -3  -3  18 23370.7 1507.03  -2
  -3   3 -15 23370.7 1507.03   1
  -3   3  19 19031.0 1346.92  -2
  -3  -3 -16 19031.0 1346.92   1
  -3  -3  20 64310.2 1763.11  -2
  -3   3 -17 64310.2 1763.11   1
  -3   3  21 40718.9 1680.06  -2
  -3  -3 -18 40718.9 1680.06   1
  -3   3  22 66601.7 4217.67  -2
  -3  -3 -19 66601.7 4217.67   1
  -3   3  23 34087.6 976.881  -2
  -3  -3 -20 34087.6 976.881   1
  -3  -3  24 29736.3 850.895  -2
  -3   3 -21 29736.3 850.895   1
   3  -4  20 12564.3 806.197  -2
   3   4 -23 12564.3 806.197   1
   3  -4  19 4796.83 869.840  -2
   3   4 -22 4796.83 869.840   1
   3  -4  18 13528.0 981.829  -2
   3   4 -21 13528.0 981.829   1
   3   4  17 33313.5 1383.47  -2
   3  -4 -20 33313.5 1383.47   1
   3   4  16 83827.9 2218.36  -2
   3  -4 -19 83827.9 2218.36   1
   3  -4  15 77475.8 2089.64  -2
   3   4 -18 77475.8 2089.64   1
   3  -4  14 109948. 2453.73  -2
   3   4 -17 109948. 2453.73   1
   3  -4  13 106363. 2420.67  -2
   3   4 -16 106363. 2420.67   1
   3  -4  12 100737. 2486.21  -2
   3   4 -15 100737. 2486.21   1
  -3  -4 -11 108657. 3699.64  -2
  -3   4  14 108657. 3699.64   1
   3  -4  10 174646. 9181.62  -2
   3   4 -13 174646. 9181.62   1
  -3   4  -9 43423.2 2589.21  -2
  -3  -4  12 43423.2 2589.21   1
   3  -4   8 109667. 3566.17  -2
   3   4 -11 109667. 3566.17   1
   3  -4   7 52852.0 2660.11  -2
   3   4 -10 52852.0 2660.11   1
  -3   4  -6 25746.7 1978.67  -2
  -3  -4   9 25746.7 1978.67   1
  -3   4  -5 44997.5 2083.72  -2
  -3  -4   8 44997.5 2083.72   1
  -3  -4  -4 82613.2 2402.87  -2
  -3   4   7 82613.2 2402.87   1
   3  -4   3 83893.1 2169.42  -2
   3   4  -6 83893.1 2169.42   1
   3   4   2 102246. 2534.17  -2
   3  -4  -5 102246. 2534.17   1
   3   4   1 224517. 3525.96  -2
   3  -4  -4 224517. 3525.96   1
   3  -4   0 168490. 3153.80  -2
   3   4  -3 168490. 3153.80   1
  -3  -4   1 354328. 4284.66  -2
  -3   4   2 354328. 4284.66   1
  -3   4   2 345291. 6213.59  -2
  -3  -4   1 345291. 6213.59   1
  -3   4   0 181951. 1233.74   1
   3  -4  -3 220310. 9512.04  -2
   3   4   0 220310. 9512.04   1
   3  -4  -4 286683. 7420.94  -2
   3   4   1 286683. 7420.94   1
  -3   4   5 122229. 2641.06  -2
  -3  -4  -2 122229. 2641.06   1
   3   4  -6 165081. 3427.65  -2
   3  -4   3 165081. 3427.65   1
   3  -4  -7 114814. 2844.19  -2
   3   4   4 114814. 2844.19   1
   3  -4  -8 44097.5 2350.92  -2
   3   4   5 44097.5 2350.92   1
   3  -4  -9 45173.4 2156.83  -2
   3   4   6 45173.4 2156.83   1
   3  -4 -10 25457.2 1826.06  -2
   3   4   7 25457.2 1826.06   1
   3   4 -11 60091.4 2967.80  -2
   3  -4   8 60091.4 2967.80   1
   3  -4 -12 27023.4 2325.13  -2
   3   4   9 27023.4 2325.13   1
   3  -4 -13 133524. 4058.49  -2
   3   4  10 133524. 4058.49   1
   3   4 -14 96919.5 10667.1  -2
   3  -4  11 96919.5 10667.1   1
   3   4 -15 82067.3 2660.60  -2
   3  -4  12 82067.3 2660.60   1
  -3  -4  16 139112. 2849.35  -2
  -3   4 -13 139112. 2849.35   1
  -3   4  17 105982. 2534.36  -2
  -3  -4 -14 105982. 2534.36   1
  -3   4  18 106628. 2455.25  -2
  -3  -4 -15 106628. 2455.25   1
  -3   4  19 86008.3 3229.46  -2
  -3  -4 -16 86008.3 3229.46   1
  -3   4  20 54988.6 1711.15  -2
  -3  -4 -17 54988.6 1711.15   1
  -3   4  21 22241.8 1046.24  -2
  -3  -4 -18 22241.8 1046.24   1
  -3  -4  22 8906.69 998.375  -2
  -3   4 -19 8906.69 998.375   1
  -3  -4  23 8345.73 812.649  -2
  -3   4 -20 8345.73 812.649   1
  -3   4 -21 381.354 389.351   1
   3  -5  20 34233.3 988.902  -2
   3   5 -23 34233.3 988.902   1
   3  -5  19 39747.0 1247.81  -2
   3   5 -22 39747.0 1247.81   1
   3  -5  18 65411.5 1567.10  -2
   3   5 -21 65411.5 1567.10   1
   3  -5  17 49649.8 1610.77  -2
   3   5 -20 49649.8 1610.77   1
   3  -5  16 21161.5 1301.33  -2
   3   5 -19 21161.5 1301.33   1
   3  -5  15 82488.1 2138.89  -2
   3   5 -18 82488.1 2138.89   1
   3   5  14 6282.58 1127.37  -2
   3  -5 -17 6282.58 1127.37   1
   3  -5  13 19871.1 1388.16  -2
   3   5 -16 19871.1 1388.16   1
  -3   5 -12 4764.57 1248.71  -2
  -3  -5  15 4764.57 1248.71   1
  -3  -5 -11 13627.9 1671.55  -2
  -3   5  14 13627.9 1671.55   1
  -3   5 -10 27294.6 2677.67  -2
  -3  -5  13 27294.6 2677.67   1
   3  -5   9 87416.1 3443.37  -2
   3   5 -12 87416.1 3443.37   1
  -3  -5  -8 98500.7 3525.62  -2
  -3   5  11 98500.7 3525.62   1
   3  -5   7 192632. 4929.02  -2
   3   5 -10 192632. 4929.02   1
  -3   5  -6 282805. 5839.78  -2
  -3  -5   9 282805. 5839.78   1
  -3   5  -5 260545. 4933.53  -2
  -3  -5   8 260545. 4933.53   1
   3   5   4 213706. 4023.95  -2
   3  -5  -7 213706. 4023.95   1
  -3  -5  -3 329841. 5041.39  -2
  -3   5   6 329841. 5041.39   1
   3  -5   2 209349. 4142.44  -2
   3   5  -5 209349. 4142.44   1
   3   5   1 132074. 4494.28  -2
   3  -5  -4 132074. 4494.28   1
   3   5   0 107276. 3000.40  -2
   3  -5  -3 107276. 3000.40   1
   3   5  -1 48043.9 1902.11  -2
   3  -5  -2 48043.9 1902.11   1
   3  -5  -2 31130.5 1512.76  -2
   3   5  -1 31130.5 1512.76   1
  -3   5   0 13818.5 408.861   1
   3  -5  -3 68933.4 2082.76  -2
   3   5   0 68933.4 2082.76   1
   3  -5  -4 77318.2 2130.31  -2
   3   5   1 77318.2 2130.31   1
   3  -5  -5 199761. 4116.58  -2
   3   5   2 199761. 4116.58   1
   3   5  -6 269501. 3678.94  -2
   3  -5   3 269501. 3678.94   1
   3  -5  -7 246342. 4771.83  -2
   3   5   4 246342. 4771.83   1
   3  -5  -8 232203. 4829.22  -2
   3   5   5 232203. 4829.22   1
   3  -5  -9 325812. 6012.08  -2
   3   5   6 325812. 6012.08   1
   3   5 -10 195836. 4700.32  -2
   3  -5   7 195836. 4700.32   1
   3  -5 -11 167346. 4362.04  -2
   3   5   8 167346. 4362.04   1
   3  -5 -12 101991. 3604.28  -2
   3   5   9 101991. 3604.28   1
   3   5 -13 55159.9 2819.97  -2
   3  -5  10 55159.9 2819.97   1
   3   5  11 28523.7 1582.77   1
  -3  -5  14 30169.3 1993.50  -2
  -3   5 -11 30169.3 1993.50   1
  -3  -5  15 7610.18 1397.03  -2
  -3   5 -12 7610.18 1397.03   1
  -3  -5  16 8668.62 1137.56  -2
  -3   5 -13 8668.62 1137.56   1
  -3  -5  17 8072.88 1282.36  -2
  -3   5 -14 8072.88 1282.36   1
  -3  -5  18 43129.7 1775.78  -2
  -3   5 -15 43129.7 1775.78   1
  -3  -5  19 22061.1 1430.12  -2
  -3   5 -16 22061.1 1430.12   1
  -3  -5  20 26633.1 1372.39  -2
  -3   5 -17 26633.1 1372.39   1
  -3  -5  21 52150.6 2605.29  -2
  -3   5 -18 52150.6 2605.29   1
  -3   5 -19 11724.6 666.518   1
  -3  -5  22 29705.3 1217.47  -2
  -3   5 -19 29705.3 1217.47   1
  -3  -5  23 45639.0 1170.57  -2
  -3   5 -20 45639.0 1170.57   1
   3   6 -23 592.975 413.848   1
   3  -6  19 6296.69 705.280  -2
   3   6 -22 6296.69 705.280   1
   3  -6  18 11404.7 1183.07  -2
   3   6 -21 11404.7 1183.07   1
   3  -6  17 9727.19 1461.58  -2
   3   6 -20 9727.19 1461.58   1
   3  -6  16 17494.5 1256.50  -2
   3   6 -19 17494.5 1256.50   1
   3  -6  15 16775.6 1241.77  -2
   3   6 -18 16775.6 1241.77   1
   3  -6  14 62242.9 2369.57  -2
   3   6 -17 62242.9 2369.57   1
   3  -6  13 74415.0 2033.89  -2
   3   6 -16 74415.0 2033.89   1
   3  -6  12 84972.4 2597.49  -2
   3   6 -15 84972.4 2597.49   1
   3  -6  11 44964.2 2025.16  -2
   3   6 -14 44964.2 2025.16   1
   3  -6  10 40678.3 2715.62  -2
   3   6 -13 40678.3 2715.62   1
  -3  -6  -9 55870.3 2983.38  -2
  -3   6  12 55870.3 2983.38   1
  -3  -6  -8 21128.0 2177.66  -2
  -3   6  11 21128.0 2177.66   1
  -3   6  -7 9500.55 1699.72  -2
  -3  -6  10 9500.55 1699.72   1
  -3   6  -6 14004.2 2491.27  -2
  -3  -6   9 14004.2 2491.27   1
  -3   6  -5 3595.31 1907.60  -2
  -3  -6   8 3595.31 1907.60   1
  -3   6  -4 5661.87 1254.74  -2
  -3  -6   7 5661.87 1254.74   1
   3   6   3 9530.15 1374.24  -2
   3  -6  -6 9530.15 1374.24   1
   3  -6   2 82671.8 3130.22  -2
   3   6  -5 82671.8 3130.22   1
  -3  -6  -1 36480.5 1949.67  -2
  -3   6   4 36480.5 1949.67   1
   3   6   0 120736. 3803.43  -2
   3  -6  -3 120736. 3803.43   1
   3   6  -1 105026. 2579.40  -2
   3  -6  -2 105026. 2579.40   1
   3  -6  -2 110565. 2223.46  -2
   3   6  -1 110565. 2223.46   1
   3  -6  -3 137691. 2820.00  -2
   3   6   0 137691. 2820.00   1
   3  -6  -4 31047.3 1693.42  -2
   3   6   1 31047.3 1693.42   1
   3  -6  -5 132967. 10398.3  -2
   3   6   2 132967. 10398.3   1
   3  -6  -6 16969.7 1717.38  -2
   3   6   3 16969.7 1717.38   1
   3  -6  -7 10447.1 1583.29  -2
   3   6   4 10447.1 1583.29   1
   3  -6  -8 7738.69 1538.30  -2
   3   6   5 7738.69 1538.30   1
   3  -6  -9 18967.6 1940.93  -2
   3   6   6 18967.6 1940.93   1
   3  -6 -10 10014.0 1683.41  -2
   3   6   7 10014.0 1683.41   1
   3  -6 -11 9754.23 1700.86  -2
   3   6   8 9754.23 1700.86   1
   3   6 -12 26716.0 2305.56  -2
   3  -6   9 26716.0 2305.56   1
   3  -6 -13 48640.9 2695.69  -2
   3   6  10 48640.9 2695.69   1
  -3  -6  14 29110.6 1802.33  -2
  -3   6 -11 29110.6 1802.33   1
  -3  -6  15 101402. 2397.47  -2
  -3   6 -12 101402. 2397.47   1
  -3  -6  16 52358.2 1910.29  -2
  -3   6 -13 52358.2 1910.29   1
  -3  -6  17 88779.4 2446.67  -2
  -3   6 -14 88779.4 2446.67   1
  -3  -6  18 17761.4 1369.34  -2
  -3   6 -15 17761.4 1369.34   1
  -3  -6  19 27079.8 1474.48  -2
  -3   6 -16 27079.8 1474.48   1
  -3  -6  20 18619.7 1234.44  -2
  -3   6 -17 18619.7 1234.44   1
  -3  -6  21 16977.6 2265.13  -2
  -3   6 -18 16977.6 2265.13   1
  -3   6 -19 14586.6 683.624   1
  -3  -6  22 16091.6 1017.59  -2
  -3   6 -19 16091.6 1017.59   1
  -3  -6  23 7859.65 729.007  -2
  -3   6 -20 7859.65 729.007   1
   3   7 -23 512.872 380.323   1
   3  -7  19 11831.6 740.531  -2
   3   7 -22 11831.6 740.531   1
   3  -7  18 913.367 731.099  -2
   3   7 -21 913.367 731.099   1
   3  -7  17 13138.9 1079.49  -2
   3   7 -20 13138.9 1079.49   1
   3  -7  16 4930.94 924.373  -2
   3   7 -19 4930.94 924.373   1
   3  -7  15 8002.15 1025.66  -2
   3   7 -18 8002.15 1025.66   1
   3  -7  14 10095.5 1138.82  -2
   3   7 -17 10095.5 1138.82   1
   3  -7  13 7074.07 1141.03  -2
   3   7 -16 7074.07 1141.03   1
  -3   7 -12 3837.67 1148.27  -2
  -3  -7  15 3837.67 1148.27   1
   3  -7  11 2990.94 1218.65  -2
   3   7 -14 2990.94 1218.65   1
  -3   7 -10 8874.07 1849.29  -2
  -3  -7  13 8874.07 1849.29   1
  -3   7  -9 9069.77 1823.13  -2
  -3  -7  12 9069.77 1823.13   1
  -3  -7  -8 25647.8 2185.17  -2
  -3   7  11 25647.8 2185.17   1
   3  -7   7 41154.1 2668.47  -2
   3   7 -10 41154.1 2668.47   1
  -3  -7  -6 8954.66 1896.57  -2
  -3   7   9 8954.66 1896.57   1
  -3   7  -5 59629.5 2856.54  -2
  -3  -7   8 59629.5 2856.54   1
   3   7   4 28245.5 2268.16  -2
   3  -7  -7 28245.5 2268.16   1
   3   7   3 59605.6 3343.28  -2
   3  -7  -6 59605.6 3343.28   1
   3   7   2 36393.7 2029.25  -2
   3  -7  -5 36393.7 2029.25   1
   3  -7   1 18241.2 1635.20  -2
   3   7  -4 18241.2 1635.20   1
   3   7   0 8325.86 1273.62  -2
   3  -7  -3 8325.86 1273.62   1
   3   7  -1 6622.86 1155.92  -2
   3  -7  -2 6622.86 1155.92   1
  -3  -7   2 4290.67 988.807  -2
  -3   7   1 4290.67 988.807   1
   3  -7  -3 6157.92 1211.95  -2
   3   7   0 6157.92 1211.95   1
  -3   7   4 12682.9 1297.27  -2
  -3  -7  -1 12682.9 1297.27   1
   3   7  -5 37679.5 3620.87  -2
   3  -7   2 37679.5 3620.87   1
   3   7  -6 30476.1 2074.71  -2
   3  -7   3 30476.1 2074.71   1
   3  -7  -7 48281.3 5752.21  -2
   3   7   4 48281.3 5752.21   1
   3  -7  -8 38371.4 2375.53  -2
   3   7   5 38371.4 2375.53   1
   3  -7  -9 20544.2 2020.24  -2
   3   7   6 20544.2 2020.24   1
   3   7 -10 31925.3 2330.22  -2
   3  -7   7 31925.3 2330.22   1
   3  -7 -11 44084.0 2534.55  -2
   3   7   8 44084.0 2534.55   1
   3  -7 -12 16035.7 1880.63  -2
   3   7   9 16035.7 1880.63   1
   3  -7 -13 11615.9 2905.66  -2
   3   7  10 11615.9 2905.66   1
  -3  -7  14 2856.81 1205.94  -2
  -3   7 -11 2856.81 1205.94   1
  -3  -7  15 3106.59 1111.06  -2
  -3   7 -12 3106.59 1111.06   1
  -3  -7  16 3762.72 1099.40  -2
  -3   7 -13 3762.72 1099.40   1
  -3  -7  17 19631.7 1401.98  -2
  -3   7 -14 19631.7 1401.98   1
  -3  -7  18 3315.12 1026.31  -2
  -3   7 -15 3315.12 1026.31   1
  -3  -7  19 6521.34 989.494  -2
  -3   7 -16 6521.34 989.494   1
  -3  -7  20 11977.5 1121.00  -2
  -3   7 -17 11977.5 1121.00   1
  -3  -7  21 2024.35 816.017  -2
  -3   7 -18 2024.35 816.017   1
  -3   7 -19 1171.22 489.143   1
  -3  -7  22 6463.56 837.046  -2
  -3   7 -19 6463.56 837.046   1
  -3  -7  23 5994.95 665.332  -2
  -3   7 -20 5994.95 665.332   1
   3  -8  19 3356.36 602.717  -2
   3   8 -22 3356.36 602.717   1
   3  -8  18 2284.26 711.169  -2
   3   8 -21 2284.26 711.169   1
   3  -8  17 407.763 830.948  -2
   3   8 -20 407.763 830.948   1
   3  -8  16 2933.63 891.122  -2
   3   8 -19 2933.63 891.122   1
   3  -8  15 234.002 857.467  -2
   3   8 -18 234.002 857.467   1
   3  -8  14 10310.6 1139.54  -2
   3   8 -17 10310.6 1139.54   1
   3  -8  13 3139.87 1043.14  -2
   3   8 -16 3139.87 1043.14   1
   3  -8  12 12441.2 1261.15  -2
   3   8 -15 12441.2 1261.15   1
   3  -8  11 4952.62 1706.69  -2
   3   8 -14 4952.62 1706.69   1
   3  -8  10 2166.90 1489.50  -2
   3   8 -13 2166.90 1489.50   1
  -3   8  -9 2289.70 1590.33  -2
  -3  -8  12 2289.70 1590.33   1
  -3  -8  -8 12013.4 1808.39  -2
  -3   8  11 12013.4 1808.39   1
  -3  -8  -7 22804.8 2131.39  -2
  -3   8  10 22804.8 2131.39   1
  -3   8  -6 4069.66 1486.45  -2
  -3  -8   9 4069.66 1486.45   1
  -3  -8  -5 2593.91 1728.09  -2
  -3   8   8 2593.91 1728.09   1
   3   8   4 9799.04 1505.07  -2
   3  -8  -7 9799.04 1505.07   1
   3   8   3 1980.78 1248.89  -2
   3  -8  -6 1980.78 1248.89   1
   3   8   2-19.9268 800.944  -2
   3  -8  -5-19.9268 800.944   1
   3   8   1 14086.8 1671.44  -2
   3  -8  -4 14086.8 1671.44   1
   3   8   0 13795.0 1487.03  -2
   3  -8  -3 13795.0 1487.03   1
   3  -8  -1 14920.5 1451.47  -2
   3   8  -2 14920.5 1451.47   1
   3  -8  -2 7897.16 1278.51  -2
   3   8  -1 7897.16 1278.51   1
   3  -8  -3 16782.9 2033.99  -2
   3   8   0 16782.9 2033.99   1
  -3   8   4 20749.6 1793.66  -2
  -3  -8  -1 20749.6 1793.66   1
   3  -8  -5 294.423 765.070  -2
   3   8   2 294.423 765.070   1
   3  -8  -6 1567.70 1327.29  -2
   3   8   3 1567.70 1327.29   1
   3   8  -7 6491.66 1556.39  -2
   3  -8   4 6491.66 1556.39   1
   3  -8  -8 3984.73 1508.46  -2
   3   8   5 3984.73 1508.46   1
   3   8  -9 1496.71 1366.25  -2
   3  -8   6 1496.71 1366.25   1
   3   8 -10 33231.0 4507.09  -2
   3  -8   7 33231.0 4507.09   1
   3   8 -11 15278.5 1876.69  -2
   3  -8   8 15278.5 1876.69   1
   3  -8 -12 3232.96 1580.54  -2
   3   8   9 3232.96 1580.54   1
  -3  -8  13 3708.49 1457.27  -2
  -3   8 -10 3708.49 1457.27   1
  -3  -8  14 4462.29 1392.72  -2
  -3   8 -11 4462.29 1392.72   1
  -3  -8  15 8462.97 1236.87  -2
  -3   8 -12 8462.97 1236.87   1
  -3  -8  16 4113.65 1105.77  -2
  -3   8 -13 4113.65 1105.77   1
  -3  -8  17 6108.45 1323.24  -2
  -3   8 -14 6108.45 1323.24   1
  -3  -8  18 1233.40 1014.66  -2
  -3   8 -15 1233.40 1014.66   1
  -3  -8  19 2048.82 922.204  -2
  -3   8 -16 2048.82 922.204   1
  -3  -8  20 989.090 699.990  -2
  -3   8 -17 989.090 699.990   1
  -3  -8  21 1296.61 753.100  -2
  -3   8 -18 1296.61 753.100   1
  -3  -8  22 6250.38 766.400  -2
  -3   8 -19 6250.38 766.400   1
  -3  -8  23 1365.81 521.449  -2
  -3   8 -20 1365.81 521.449   1
   3  -9  19 16647.3 709.238  -2
   3   9 -22 16647.3 709.238   1
   3  -9  18 4789.98 710.226  -2
   3   9 -21 4789.98 710.226   1
   3  -9  17 20741.3 1080.40  -2
   3   9 -20 20741.3 1080.40   1
   3  -9  16 445.910 834.882  -2
   3   9 -19 445.910 834.882   1
   3  -9  15 5352.12 1007.36  -2
   3   9 -18 5352.12 1007.36   1
   3  -9  14 1436.44 911.934  -2
   3   9 -17 1436.44 911.934   1
   3  -9  13 3453.88 1053.49  -2
   3   9 -16 3453.88 1053.49   1
   3  -9  12 10585.8 1258.00  -2
   3   9 -15 10585.8 1258.00   1
   3  -9  11 1663.57 1041.36  -2
   3   9 -14 1663.57 1041.36   1
   3  -9  10 33415.5 1753.88  -2
   3   9 -13 33415.5 1753.88   1
   3  -9   9 23469.4 1919.67  -2
   3   9 -12 23469.4 1919.67   1
  -3  -9  -8 32486.4 2309.43  -2
  -3   9  11 32486.4 2309.43   1
  -3   9  -7 40853.0 2781.69  -2
  -3  -9  10 40853.0 2781.69   1
  -3   9  -6 20756.6 2456.02  -2
  -3  -9   9 20756.6 2456.02   1
   3  -9   5 49041.4 2678.35  -2
   3   9  -8 49041.4 2678.35   1
  -3   9  -4 1067.48 1007.22  -2
  -3  -9   7 1067.48 1007.22   1
   3   9   3 11713.8 1748.78  -2
   3  -9  -6 11713.8 1748.78   1
   3  -9   2 3736.81 1313.60  -2
   3   9  -5 3736.81 1313.60   1
   3   9   1 22544.9 2793.88  -2
   3  -9  -4 22544.9 2793.88   1
   3   9   0 12152.3 1653.67  -2
   3  -9  -3 12152.3 1653.67   1
   3  -9  -1 11614.1 1553.30  -2
   3   9  -2 11614.1 1553.30   1
   3  -9  -2 16339.9 1589.52  -2
   3   9  -1 16339.9 1589.52   1
   3   9  -3 7819.00 1362.80  -2
   3  -9   0 7819.00 1362.80   1
   3  -9  -4 12393.8 1701.79  -2
   3   9   1 12393.8 1701.79   1
   3   9  -5 1109.82 1658.52  -2
   3  -9   2 1109.82 1658.52   1
   3  -9  -6 5648.83 1518.59  -2
   3   9   3 5648.83 1518.59   1
   3   9  -7 2421.47 1429.36  -2
   3  -9   4 2421.47 1429.36   1
   3   9  -8 21449.7 2093.70  -2
   3  -9   5 21449.7 2093.70   1
   3   9  -9 41246.6 2617.85  -2
   3  -9   6 41246.6 2617.85   1
   3  -9 -10 20190.0 2978.58  -2
   3   9   7 20190.0 2978.58   1
   3   9 -11 67910.5 3200.05  -2
   3  -9   8 67910.5 3200.05   1
  -3  -9  12 20085.1 1631.94  -2
  -3   9  -9 20085.1 1631.94   1
   3   9  10 47273.6 2180.68   1
  -3  -9  13 54286.3 2213.07  -2
  -3   9 -10 54286.3 2213.07   1
  -3  -9  14 2649.51 1147.85  -2
  -3   9 -11 2649.51 1147.85   1
  -3  -9  15 13595.3 1346.66  -2
  -3   9 -12 13595.3 1346.66   1
  -3  -9  16 6494.16 1168.27  -2
  -3   9 -13 6494.16 1168.27   1
  -3  -9  17 679.367 1078.02  -2
  -3   9 -14 679.367 1078.02   1
  -3  -9  18 5548.78 982.595  -2
  -3   9 -15 5548.78 982.595   1
  -3  -9  19 1913.52 909.919  -2
  -3   9 -16 1913.52 909.919   1
  -3  -9  20 11520.1 953.442  -2
  -3   9 -17 11520.1 953.442   1
  -3  -9  21 3872.32 758.156  -2
  -3   9 -18 3872.32 758.156   1
  -3  -9  22 11870.5 948.255  -2
  -3   9 -19 11870.5 948.255   1
   3  10 -22 860.692 354.882   1
   3 -10  18 3009.66 906.742  -2
   3  10 -21 3009.66 906.742   1
   3 -10  17 4871.00 738.772  -2
   3  10 -20 4871.00 738.772   1
   3 -10  16 4712.86 894.269  -2
   3  10 -19 4712.86 894.269   1
   3 -10  15 18908.8 1189.32  -2
   3  10 -18 18908.8 1189.32   1
   3 -10  14 43808.1 1585.38  -2
   3  10 -17 43808.1 1585.38   1
   3 -10  13 61159.0 1923.20  -2
   3  10 -16 61159.0 1923.20   1
   3 -10  12 62070.1 2057.82  -2
   3  10 -15 62070.1 2057.82   1
   3 -10  11 112255. 2554.24  -2
   3  10 -14 112255. 2554.24   1
   3 -10  10 42076.2 2066.79  -2
   3  10 -13 42076.2 2066.79   1
   3 -10   9 113239. 3727.30  -2
   3  10 -12 113239. 3727.30   1
   3 -10   8 6747.59 1510.31  -2
   3  10 -11 6747.59 1510.31   1
  -3 -10  -7 59449.6 3316.65  -2
  -3  10  10 59449.6 3316.65   1
   3 -10   6 1369.76 918.451  -2
   3  10  -9 1369.76 918.451   1
   3 -10   5 4883.04 1534.65  -2
   3  10  -8 4883.04 1534.65   1
   3 -10   4 12578.5 1742.29  -2
   3  10  -7 12578.5 1742.29   1
   3  10   3 6138.06 1564.69  -2
   3 -10  -6 6138.06 1564.69   1
   3  10   2 83760.1 3004.78  -2
   3 -10  -5 83760.1 3004.78   1
  -3  10  -1 65823.5 3198.83  -2
  -3 -10   4 65823.5 3198.83   1
   3  10   0 185071. 4208.03  -2
   3 -10  -3 185071. 4208.03   1
   3 -10  -1 239315. 23081.4  -2
   3  10  -2 239315. 23081.4   1
   3  10  -2 142872. 3521.02  -2
   3 -10  -1 142872. 3521.02   1
   3 -10  -3 342490. 31602.0  -2
   3  10   0 342490. 31602.0   1
   3 -10  -4 35206.7 5802.05  -2
   3  10   1 35206.7 5802.05   1
   3  10  -5 182713. 17555.1  -2
   3 -10   2 182713. 17555.1   1
   3 -10  -6 3104.19 1412.33  -2
   3  10   3 3104.19 1412.33   1
   3 -10  -7 26537.5 2936.82  -2
   3  10   4 26537.5 2936.82   1
   3  10  -8 7441.84 1713.26  -2
   3 -10   5 7441.84 1713.26   1
   3 -10  -9 3260.65 1945.19  -2
   3  10   6 3260.65 1945.19   1
   3 -10 -10 31212.0 3403.58  -2
   3  10   7 31212.0 3403.58   1
  -3 -10  11 12054.8 1515.27  -2
  -3  10  -8 12054.8 1515.27   1
  -3 -10  12 56551.2 2019.06  -2
  -3  10  -9 56551.2 2019.06   1
  -3 -10  13 90147.1 2583.08  -2
  -3  10 -10 90147.1 2583.08   1
  -3 -10  14 58719.7 2100.15  -2
  -3  10 -11 58719.7 2100.15   1
  -3 -10  15 117160. 3135.28  -2
  -3  10 -12 117160. 3135.28   1
  -3 -10  16 31036.8 1592.92  -2
  -3  10 -13 31036.8 1592.92   1
  -3 -10  17 78783.8 2154.18  -2
  -3  10 -14 78783.8 2154.18   1
  -3 -10  18 9564.92 1057.84  -2
  -3  10 -15 9564.92 1057.84   1
  -3 -10  19 8573.02 1010.65  -2
  -3  10 -16 8573.02 1010.65   1
  -3 -10  20 3892.27 805.323  -2
  -3  10 -17 3892.27 805.323   1
  -3  10 -18 3046.68 445.364   1
  -3 -10  21 3543.83 1032.40  -2
  -3  10 -18 3543.83 1032.40   1
  -3 -10  22 7136.97 590.879  -2
  -3  10 -19 7136.97 590.879   1
   3 -11  18 20649.0 758.388  -2
   3  11 -21 20649.0 758.388   1
   3 -11  17 45278.0 1173.85  -2
   3  11 -20 45278.0 1173.85   1
   3 -11  16 4319.58 788.534  -2
   3  11 -19 4319.58 788.534   1
   3 -11  15 33456.3 1375.07  -2
   3  11 -18 33456.3 1375.07   1
   3 -11  14 453.722 862.324  -2
   3  11 -17 453.722 862.324   1
   3 -11  13 11126.4 1155.46  -2
   3  11 -16 11126.4 1155.46   1
   3 -11  12 31483.1 1513.56  -2
   3  11 -15 31483.1 1513.56   1
   3 -11  11 15064.4 1325.13  -2
   3  11 -14 15064.4 1325.13   1
   3 -11  10 51525.9 1858.13  -2
   3  11 -13 51525.9 1858.13   1
  -3  11  -9 56080.7 2584.80  -2
  -3 -11  12 56080.7 2584.80   1
   3 -11   8 68348.4 2498.21  -2
   3  11 -11 68348.4 2498.21   1
   3 -11   7 145465. 4102.24  -2
   3  11 -10 145465. 4102.24   1
  -3  11  -6 72915.7 3250.28  -2
  -3 -11   9 72915.7 3250.28   1
   3 -11   5 121260. 4923.87  -2
   3  11  -8 121260. 4923.87   1
   3 -11   4 72678.8 3155.77  -2
   3  11  -7 72678.8 3155.77   1
  -3  11  -3 135647. 5857.83  -2
  -3 -11   6 135647. 5857.83   1
   3  11   2 36801.1 2345.93  -2
   3 -11  -5 36801.1 2345.93   1
   3  11   1 89543.2 3393.97  -2
   3 -11  -4 89543.2 3393.97   1
  -3  11   0 9201.47 1569.46  -2
  -3 -11   3 9201.47 1569.46   1
   3  11  -1 12298.2 1671.00  -2
   3 -11  -2 12298.2 1671.00   1
   3  11  -2 6234.09 1499.13  -2
   3 -11  -1 6234.09 1499.13   1
   3 -11  -3 4502.18 2582.81  -2
   3  11   0 4502.18 2582.81   1
   3 -11  -4 50704.3 5313.42  -2
   3  11   1 50704.3 5313.42   1
   3 -11  -5 57075.0 4762.40  -2
   3  11   2 57075.0 4762.40   1
   3 -11  -6 84552.1 9465.38  -2
   3  11   3 84552.1 9465.38   1
   3 -11  -7 107216. 4136.97  -2
   3  11   4 107216. 4136.97   1
   3 -11  -8 66891.2 11371.2  -2
   3  11   5 66891.2 11371.2   1
   3 -11  -9 111807. 4233.37  -2
   3  11   6 111807. 4233.37   1
   3 -11 -10 79662.4 2802.61  -2
   3  11   7 79662.4 2802.61   1
   3 -11 -11 141547. 3416.22  -2
   3  11   8 141547. 3416.22   1
  -3  11  12 61908.7 2370.54  -2
  -3 -11  -9 61908.7 2370.54   1
  -3 -11  13 102447. 2725.70  -2
  -3  11 -10 102447. 2725.70   1
  -3 -11  14 19198.3 1468.67  -2
  -3  11 -11 19198.3 1468.67   1
  -3 -11  15 65564.5 2079.85  -2
  -3  11 -12 65564.5 2079.85   1
  -3 -11  16 12036.2 1427.56  -2
  -3  11 -13 12036.2 1427.56   1
  -3 -11  17 199.164 952.476  -2
  -3  11 -14 199.164 952.476   1
  -3 -11  18 16652.7 1144.30  -2
  -3  11 -15 16652.7 1144.30   1
  -3 -11  19 5398.54 823.241  -2
  -3  11 -16 5398.54 823.241   1
  -3  11 -17 7937.66 560.615   1
  -3 -11  20 26058.9 1074.89  -2
  -3  11 -17 26058.9 1074.89   1
  -3  11 -18 23638.8 670.714   1
  -3 -11  21 28560.5 902.949  -2
  -3  11 -18 28560.5 902.949   1
   3 -12  18 10278.0 608.134  -2
   3  12 -21 10278.0 608.134   1
   3 -12  17 4493.55 585.860  -2
   3  12 -20 4493.55 585.860   1
   3 -12  16 20413.6 951.052  -2
   3  12 -19 20413.6 951.052   1
   3 -12  15 40516.3 1344.77  -2
   3  12 -18 40516.3 1344.77   1
   3 -12  14 42110.9 1506.05  -2
   3  12 -17 42110.9 1506.05   1
   3  12  13 117708. 2402.33  -2
   3 -12 -16 117708. 2402.33   1
   3 -12  12 70780.8 2029.88  -2
   3  12 -15 70780.8 2029.88   1
   3 -12  11 98249.6 2452.62  -2
   3  12 -14 98249.6 2452.62   1
   3 -12  10 97998.6 2940.45  -2
   3  12 -13 97998.6 2940.45   1
   3 -12   9 110170. 2821.50  -2
   3  12 -12 110170. 2821.50   1
   3 -12   8 97209.9 2982.91  -2
   3  12 -11 97209.9 2982.91   1
   3 -12   7 46524.6 2161.51  -2
   3  12 -10 46524.6 2161.51   1
  -3  12  -6 6313.47 1285.36  -2
  -3 -12   9 6313.47 1285.36   1
   3 -12   5 23820.4 2335.29  -2
   3  12  -8 23820.4 2335.29   1
   3 -12   4 41069.5 2445.89  -2
   3  12  -7 41069.5 2445.89   1
   3 -12   3 28616.4 2194.21  -2
   3  12  -6 28616.4 2194.21   1
  -3  12  -2 103935. 5159.63  -2
  -3 -12   5 103935. 5159.63   1
  -3  12  -1 192190. 19210.6  -2
  -3 -12   4 192190. 19210.6   1
   3 -12   0 137900. 4268.42  -2
   3  12  -3 137900. 4268.42   1
   3  12  -1 291080. 6184.41  -2
   3 -12  -2 291080. 6184.41   1
   3  12  -2 236567. 15374.7  -2
   3 -12  -1 236567. 15374.7   1
   3  12  -3 277838. 12351.3  -2
   3 -12   0 277838. 12351.3   1
   3 -12  -4 211892. 7462.50  -2
   3  12   1 211892. 7462.50   1
   3 -12  -5 212532. 5676.44  -2
   3  12   2 212532. 5676.44   1
   3 -12  -6 59189.3 3389.53  -2
   3  12   3 59189.3 3389.53   1
   3 -12  -7 78730.2 3780.31  -2
   3  12   4 78730.2 3780.31   1
   3 -12  -8 12838.5 1981.92  -2
   3  12   5 12838.5 1981.92   1
  -3  12   9 6070.33 1371.93  -2
  -3 -12  -6 6070.33 1371.93   1
  -3  12  10 23695.4 1979.80  -2
  -3 -12  -7 23695.4 1979.80   1
  -3  12  11 73001.9 2253.48  -2
  -3 -12  -8 73001.9 2253.48   1
  -3  12  12 55395.9 2075.14  -2
  -3 -12  -9 55395.9 2075.14   1
  -3  12  13 131251. 2629.76  -2
  -3 -12 -10 131251. 2629.76   1
  -3 -12  14 65756.1 2203.38  -2
  -3  12 -11 65756.1 2203.38   1
  -3 -12  15 113028. 2552.66  -2
  -3  12 -12 113028. 2552.66   1
  -3 -12  16 97156.3 2277.94  -2
  -3  12 -13 97156.3 2277.94   1
  -3 -12  17 75225.9 2053.44  -2
  -3  12 -14 75225.9 2053.44   1
  -3 -12  18 46069.7 1467.81  -2
  -3  12 -15 46069.7 1467.81   1
  -3 -12  19 23267.0 1019.06  -2
  -3  12 -16 23267.0 1019.06   1
  -3 -12  20 6859.17 687.512  -2
  -3  12 -17 6859.17 687.512   1
  -3  12 -18 15385.8 539.000   1
  -3 -12  21 16252.5 748.137  -2
  -3  12 -18 16252.5 748.137   1
   3 -13  17 22652.8 2125.60  -2
   3  13 -20 22652.8 2125.60   1
   3 -13  16 9715.56 939.418  -2
   3  13 -19 9715.56 939.418   1
   3 -13  15 28761.8 1174.47  -2
   3  13 -18 28761.8 1174.47   1
   3 -13  14 4794.18 917.001  -2
   3  13 -17 4794.18 917.001   1
   3 -13  13 5055.09 946.875  -2
   3  13 -16 5055.09 946.875   1
   3  13  12 13724.4 1249.57  -2
   3 -13 -15 13724.4 1249.57   1
   3 -13  11 24014.0 1439.90  -2
   3  13 -14 24014.0 1439.90   1
   3 -13  10 33224.9 1591.80  -2
   3  13 -13 33224.9 1591.80   1
   3 -13   9 59678.5 2105.58  -2
   3  13 -12 59678.5 2105.58   1
   3 -13   8 80798.1 2285.45  -2
   3  13 -11 80798.1 2285.45   1
   3 -13   7 69871.6 2509.32  -2
   3  13 -10 69871.6 2509.32   1
   3 -13   6 107322. 3036.16  -2
   3  13  -9 107322. 3036.16   1
   3 -13   5 103037. 4142.19  -2
   3  13  -8 103037. 4142.19   1
   3 -13   4 67337.6 2606.96  -2
   3  13  -7 67337.6 2606.96   1
   3 -13   3 105869. 17694.9  -2
   3  13  -6 105869. 17694.9   1
   3 -13   2 14845.0 3675.42  -2
   3  13  -5 14845.0 3675.42   1
  -3  13  -1 53438.1 9102.84  -2
  -3 -13   4 53438.1 9102.84   1
  -3  13   0 14694.4 2008.06  -2
  -3 -13   3 14694.4 2008.06   1
   3 -13  -1 19161.3 2469.43  -2
   3  13  -2 19161.3 2469.43   1
   3 -13  -2 25032.0 2840.01  -2
   3  13  -1 25032.0 2840.01   1
   3 -13  -3 8282.61 2195.67  -2
   3  13   0 8282.61 2195.67   1
   3 -13  -4 26677.4 2726.41  -2
   3  13   1 26677.4 2726.41   1
   3 -13  -5 10604.2 2011.05  -2
   3  13   2 10604.2 2011.05   1
   3 -13  -6 94656.9 10519.3  -2
   3  13   3 94656.9 10519.3   1
  -3  13   7 55677.3 2574.55  -2
  -3 -13  -4 55677.3 2574.55   1
  -3  13   8 123817. 3404.87  -2
  -3 -13  -5 123817. 3404.87   1
  -3  13   9 100485. 3121.22  -2
  -3 -13  -6 100485. 3121.22   1
  -3  13  10 67317.4 2579.71  -2
  -3 -13  -7 67317.4 2579.71   1
  -3 -13  11 123197. 2746.51  -2
  -3  13  -8 123197. 2746.51   1
  -3  13  12 61231.6 2064.60  -2
  -3 -13  -9 61231.6 2064.60   1
  -3  13  13 62171.3 2084.44  -2
  -3 -13 -10 62171.3 2084.44   1
  -3 -13  14 29328.0 1368.40  -2
  -3  13 -11 29328.0 1368.40   1
  -3 -13  15 25264.6 1487.88  -2
  -3  13 -12 25264.6 1487.88   1
  -3 -13  16 6207.64 1320.40  -2
  -3  13 -13 6207.64 1320.40   1
  -3 -13  17 4293.43 956.266  -2
  -3  13 -14 4293.43 956.266   1
  -3 -13  18 17724.1 1083.19  -2
  -3  13 -15 17724.1 1083.19   1
  -3 -13  19 6481.58 765.856  -2
  -3  13 -16 6481.58 765.856   1
  -3  13 -17 12432.4 530.787   1
  -3 -13  20 20598.3 831.249  -2
  -3  13 -17 20598.3 831.249   1
   3 -14  17 4422.84 512.449  -2
   3  14 -20 4422.84 512.449   1
   3 -14  16 4176.38 811.991  -2
   3  14 -19 4176.38 811.991   1
   3 -14  15 15132.6 1081.64  -2
   3  14 -18 15132.6 1081.64   1
   3 -14  14 13326.7 1009.80  -2
   3  14 -17 13326.7 1009.80   1
   3  14  13 33470.3 1374.20  -2
   3 -14 -16 33470.3 1374.20   1
   3  14  12 21898.6 1255.37  -2
   3 -14 -15 21898.6 1255.37   1
   3  14  11 33996.8 1546.52  -2
   3 -14 -14 33996.8 1546.52   1
   3 -14  10 30451.1 1560.48  -2
   3  14 -13 30451.1 1560.48   1
   3 -14   9 36788.7 1712.25  -2
   3  14 -12 36788.7 1712.25   1
   3 -14   8 34015.3 1675.51  -2
   3  14 -11 34015.3 1675.51   1
   3 -14   7 14570.9 1343.28  -2
   3  14 -10 14570.9 1343.28   1
   3 -14   6 13225.4 1363.81  -2
   3  14  -9 13225.4 1363.81   1
   3 -14   5 4436.47 1120.38  -2
   3  14  -8 4436.47 1120.38   1
   3 -14   4 12011.9 1422.81  -2
   3  14  -7 12011.9 1422.81   1
   3 -14   3 27465.3 1647.01  -2
   3  14  -6 27465.3 1647.01   1
  -3  14  -2 53479.4 3319.60  -2
  -3 -14   5 53479.4 3319.60   1
   3 -14   1 59112.6 2234.14  -2
   3  14  -4 59112.6 2234.14   1
   3 -14   0 60872.8 3730.40  -2
   3  14  -3 60872.8 3730.40   1
   3 -14  -1 80017.7 4243.84  -2
   3  14  -2 80017.7 4243.84   1
   3 -14  -2 73745.6 4229.61  -2
   3  14  -1 73745.6 4229.61   1
   3 -14  -3 47540.0 3589.61  -2
   3  14   0 47540.0 3589.61   1
  -3  14   4 75462.0 3128.59  -2
  -3 -14  -1 75462.0 3128.59   1
   3 -14  -5 72190.0 2433.39  -2
   3  14   2 72190.0 2433.39   1
  -3  14   6 48975.0 2386.42  -2
  -3 -14  -3 48975.0 2386.42   1
  -3  14   7 27829.2 1958.79  -2
  -3 -14  -4 27829.2 1958.79   1
  -3  14   8 4071.22 1299.02  -2
  -3 -14  -5 4071.22 1299.02   1
  -3  14   9 7277.90 1230.50  -2
  -3 -14  -6 7277.90 1230.50   1
  -3 -14  10 14937.9 1418.18  -2
  -3  14  -7 14937.9 1418.18   1
  -3  14  11 20335.2 1482.52  -2
  -3 -14  -8 20335.2 1482.52   1
  -3  14  12 34829.4 1680.50  -2
  -3 -14  -9 34829.4 1680.50   1
  -3  14  13 26779.3 1627.70  -2
  -3 -14 -10 26779.3 1627.70   1
  -3 -14  14 37636.2 1519.26  -2
  -3  14 -11 37636.2 1519.26   1
  -3 -14  15 17053.5 1322.69  -2
  -3  14 -12 17053.5 1322.69   1
  -3 -14  16 34718.4 1989.86  -2
  -3  14 -13 34718.4 1989.86   1
  -3 -14  17 16247.1 1078.51  -2
  -3  14 -14 16247.1 1078.51   1
  -3 -14  18 22428.5 1156.38  -2
  -3  14 -15 22428.5 1156.38   1
  -3 -14  19 11241.7 760.779  -2
  -3  14 -16 11241.7 760.779   1
  -3  14 -17 6178.22 399.379   1
  -3 -14  20 6930.75 591.310  -2
  -3  14 -17 6930.75 591.310   1
   3 -15  16 4775.61 663.175  -2
   3  15 -19 4775.61 663.175   1
   3 -15  15 1064.28 620.896  -2
   3  15 -18 1064.28 620.896   1
   3 -15  14 8026.05 845.739  -2
   3  15 -17 8026.05 845.739   1
   3  15  13 6019.43 899.454  -2
   3 -15 -16 6019.43 899.454   1
   3  15  12 4533.22 876.586  -2
   3 -15 -15 4533.22 876.586   1
   3 -15  11 4038.06 961.912  -2
   3  15 -14 4038.06 961.912   1
   3  15  10 2882.23 988.634  -2
   3 -15 -13 2882.23 988.634   1
   3 -15   9 4815.31 1055.13  -2
   3  15 -12 4815.31 1055.13   1
   3 -15   8 3470.44 1029.33  -2
   3  15 -11 3470.44 1029.33   1
   3 -15   7 3200.38 1005.08  -2
   3  15 -10 3200.38 1005.08   1
   3 -15   6 4791.13 1099.88  -2
   3  15  -9 4791.13 1099.88   1
   3 -15   5 6200.40 1110.81  -2
   3  15  -8 6200.40 1110.81   1
  -3  15  -4 15571.1 1485.53  -2
  -3 -15   7 15571.1 1485.53   1
   3 -15   3 815.675 1095.68  -2
   3  15  -6 815.675 1095.68   1
   3 -15   2 4130.46 1166.11  -2
   3  15  -5 4130.46 1166.11   1
  -3  15  -1 10175.1 1691.21  -2
  -3 -15   4 10175.1 1691.21   1
  -3  15   0 827.689 489.507  -2
  -3 -15   3 827.689 489.507   1
   3 -15  -1 5528.52 1076.23  -2
   3  15  -2 5528.52 1076.23   1
   3 -15  -2 7878.72 1145.11  -2
   3  15  -1 7878.72 1145.11   1
   3 -15  -3 2217.33 1060.81  -2
   3  15   0 2217.33 1060.81   1
   3 -15  -4 6341.92 1332.52  -2
   3  15   1 6341.92 1332.52   1
  -3  15   5 3105.89 1084.49  -2
  -3 -15  -2 3105.89 1084.49   1
  -3  15   6 1193.34 1405.62  -2
  -3 -15  -3 1193.34 1405.62   1
  -3  15   7 8258.85 1344.48  -2
  -3 -15  -4 8258.85 1344.48   1
  -3  15   8 11851.8 1361.20  -2
  -3 -15  -5 11851.8 1361.20   1
  -3  15   9 3925.13 1140.04  -2
  -3 -15  -6 3925.13 1140.04   1
  -3  15  10 3746.02 1119.48  -2
  -3 -15  -7 3746.02 1119.48   1
  -3  15  11 2569.79 1066.89  -2
  -3 -15  -8 2569.79 1066.89   1
  -3  15  12 6300.91 1112.05  -2
  -3 -15  -9 6300.91 1112.05   1
  -3 -15  13 4243.67 1021.66  -2
  -3  15 -10 4243.67 1021.66   1
  -3 -15  14 2815.95 1136.13  -2
  -3  15 -11 2815.95 1136.13   1
  -3 -15  15 8939.84 1074.91  -2
  -3  15 -12 8939.84 1074.91   1
  -3 -15  16 5525.90 1019.24  -2
  -3  15 -13 5525.90 1019.24   1
  -3 -15  17 9764.70 900.362  -2
  -3  15 -14 9764.70 900.362   1
  -3 -15  18 874.434 655.377  -2
  -3  15 -15 874.434 655.377   1
  -3 -15  19 3702.96 564.498  -2
  -3  15 -16 3702.96 564.498   1
   3 -16  15 2627.34 557.467  -2
   3  16 -18 2627.34 557.467   1
   3 -16  14 1019.24 647.151  -2
   3  16 -17 1019.24 647.151   1
   3  16  13 1562.79 800.735  -2
   3 -16 -16 1562.79 800.735   1
   3  16  12 2118.03 841.975  -2
   3 -16 -15 2118.03 841.975   1
   3  16  11 1630.24 835.390  -2
   3 -16 -14 1630.24 835.390   1
   3  16  10 1130.98 882.703  -2
   3 -16 -13 1130.98 882.703   1
   3  16   9 4455.61 993.668  -2
   3 -16 -12 4455.61 993.668   1
   3 -16   8 1287.08 916.015  -2
   3  16 -11 1287.08 916.015   1
   3 -16   7 3697.48 1012.17  -2
   3  16 -10 3697.48 1012.17   1
   3 -16   6 1442.97 935.496  -2
   3  16  -9 1442.97 935.496   1
   3 -16   5 1146.72 977.158  -2
   3  16  -8 1146.72 977.158   1
   3 -16   4 2670.34 988.836  -2
   3  16  -7 2670.34 988.836   1
   3 -16   3 2230.64 1053.84  -2
   3  16  -6 2230.64 1053.84   1
   3 -16   2 2658.91 946.135  -2
   3  16  -5 2658.91 946.135   1
   3 -16   1 803.180 976.726  -2
   3  16  -4 803.180 976.726   1
   3 -16   0 1578.25 951.003  -2
   3  16  -3 1578.25 951.003   1
   3 -16  -1 1363.08 1102.54  -2
   3  16  -2 1363.08 1102.54   1
  -3  16   2 1367.49 732.810  -2
  -3 -16   1 1367.49 732.810   1
  -3  16   3 4375.78 1128.96  -2
  -3 -16   0 4375.78 1128.96   1
   3 -16  -4 1107.22 835.777  -2
   3  16   1 1107.22 835.777   1
  -3  16   5 1441.08 1064.76  -2
  -3 -16  -2 1441.08 1064.76   1
  -3  16   6 1971.88 1118.46  -2
  -3 -16  -3 1971.88 1118.46   1
  -3  16   7 2906.72 1148.12  -2
  -3 -16  -4 2906.72 1148.12   1
  -3  16   8 2130.39 1066.43  -2
  -3 -16  -5 2130.39 1066.43   1
  -3  16   9 1706.34 1057.30  -2
  -3 -16  -6 1706.34 1057.30   1
  -3  16  10 5641.72 1134.63  -2
  -3 -16  -7 5641.72 1134.63   1
  -3  16  11 1054.75 963.820  -2
  -3 -16  -8 1054.75 963.820   1
  -3  16  12 7375.13 1095.71  -2
  -3 -16  -9 7375.13 1095.71   1
  -3  16  13 1495.98 886.678  -2
  -3 -16 -10 1495.98 886.678   1
  -3  16  14 783.655 822.513  -2
  -3 -16 -11 783.655 822.513   1
  -3  16  15 1344.20 746.312  -2
  -3 -16 -12 1344.20 746.312   1
  -3 -16  16 3448.13 803.331  -2
  -3  16 -13 3448.13 803.331   1
  -3 -16  17 438.664 561.536  -2
  -3  16 -14 438.664 561.536   1
  -3 -16  18 1448.66 559.110  -2
  -3  16 -15 1448.66 559.110   1
   3 -17  14 6844.17 643.255  -2
   3  17 -17 6844.17 643.255   1
   3  17  13 7737.49 760.543  -2
   3 -17 -16 7737.49 760.543   1
   3 -17  12 3599.67 785.539  -2
   3  17 -15 3599.67 785.539   1
   3  17  11 2269.86 751.430  -2
   3 -17 -14 2269.86 751.430   1
   3  17  10 555.195 787.209  -2
   3 -17 -13 555.195 787.209   1
   3  17   9 4760.48 930.559  -2
   3 -17 -12 4760.48 930.559   1
   3 -17   8 8594.37 1053.45  -2
   3  17 -11 8594.37 1053.45   1
   3  17   7 23907.3 1370.68  -2
   3 -17 -10 23907.3 1370.68   1
   3 -17   6 40471.6 2194.83  -2
   3  17  -9 40471.6 2194.83   1
   3 -17   5 20507.9 1388.15  -2
   3  17  -8 20507.9 1388.15   1
   3 -17   4 48577.6 12238.1  -2
   3  17  -7 48577.6 12238.1   1
   3 -17   3 14814.3 1278.93  -2
   3  17  -6 14814.3 1278.93   1
   3 -17   2 54205.4 10013.6  -2
   3  17  -5 54205.4 10013.6   1
  -3  17  -1 10787.6 2348.58  -2
  -3 -17   4 10787.6 2348.58   1
  -3  17   0 7177.82 1019.91  -2
  -3 -17   3 7177.82 1019.91   1
   3 -17  -1 3091.73 1015.27  -2
   3  17  -2 3091.73 1015.27   1
   3 -17  -2 4614.15 1121.92  -2
   3  17  -1 4614.15 1121.92   1
  -3  17   3 4499.85 1107.99  -2
  -3 -17   0 4499.85 1107.99   1
   3 -17  -4 8610.96 1209.70  -2
   3  17   1 8610.96 1209.70   1
  -3  17   5 28723.4 1684.44  -2
  -3 -17  -2 28723.4 1684.44   1
  -3  17   6 31080.2 1694.04  -2
  -3 -17  -3 31080.2 1694.04   1
  -3  17   7 26572.5 1875.26  -2
  -3 -17  -4 26572.5 1875.26   1
  -3  17   8 45780.1 2069.84  -2
  -3 -17  -5 45780.1 2069.84   1
  -3  17   9 24707.8 1547.00  -2
  -3 -17  -6 24707.8 1547.00   1
  -3  17  10 52040.7 1863.12  -2
  -3 -17  -7 52040.7 1863.12   1
  -3  17  11 5364.56 1023.71  -2
  -3 -17  -8 5364.56 1023.71   1
  -3  17  12 10760.8 1107.80  -2
  -3 -17  -9 10760.8 1107.80   1
   3 -17 -13 787.226 650.018  -2
   3  17  10 787.226 650.018   1
  -3 -17  14 5402.44 844.094  -2
  -3  17 -11 5402.44 844.094   1
  -3 -17  15 7889.45 791.831  -2
  -3  17 -12 7889.45 791.831   1
  -3 -17  16 3947.76 750.956  -2
  -3  17 -13 3947.76 750.956   1
  -3 -17  17 6213.50 674.641  -2
  -3  17 -14 6213.50 674.641   1
  -3  17 -15 3423.30 426.957   1
   3  18  13 17108.4 756.760  -2
   3 -18 -16 17108.4 756.760   1
   3  18  12 40736.0 1108.29  -2
   3 -18 -15 40736.0 1108.29   1
   3  18  11 6439.12 821.228  -2
   3 -18 -14 6439.12 821.228   1
   3  18  10 48062.6 1362.48  -2
   3 -18 -13 48062.6 1362.48   1
   3  18   9 4780.60 859.054  -2
   3 -18 -12 4780.60 859.054   1
   3  18   8 21545.1 1246.21  -2
   3 -18 -11 21545.1 1246.21   1
   3  18   7 804.833 867.129  -2
   3 -18 -10 804.833 867.129   1
   3  18   6 11439.9 1157.69  -2
   3 -18  -9 11439.9 1157.69   1
   3  18   5 9730.83 1171.62  -2
   3 -18  -8 9730.83 1171.62   1
   3 -18   4 2754.27 1000.29  -2
   3  18  -7 2754.27 1000.29   1
   3 -18   3 43445.3 5226.76  -2
   3  18  -6 43445.3 5226.76   1
   3  18   2 26576.0 1512.80  -2
   3 -18  -5 26576.0 1512.80   1
  -3  18  -1 29534.9 1429.90  -2
  -3 -18   4 29534.9 1429.90   1
  -3  18   0 52793.3 1912.22  -2
  -3 -18   3 52793.3 1912.22   1
  -3  18   1 25281.8 1402.29  -2
  -3 -18   2 25281.8 1402.29   1
   3 -18  -2 55201.0 2015.35  -2
   3  18  -1 55201.0 2015.35   1
   3 -18  -3 28005.7 1521.99  -2
   3  18   0 28005.7 1521.99   1
  -3  18   4 63843.8 2149.41  -2
  -3 -18  -1 63843.8 2149.41   1
   3 -18  -5 14815.1 1462.16  -2
   3  18   2 14815.1 1462.16   1
  -3  18   6 71237.9 2180.19  -2
  -3 -18  -3 71237.9 2180.19   1
   3 -18  -7 2463.89 968.660  -2
   3  18   4 2463.89 968.660   1
   3 -18  -8 20347.7 1389.08  -2
   3  18   5 20347.7 1389.08   1
   3 -18  -9 6186.62 1057.52  -2
   3  18   6 6186.62 1057.52   1
   3 -18 -10 948.733 891.500  -2
   3  18   7 948.733 891.500   1
   3 -18 -11 10735.6 1060.67  -2
   3  18   8 10735.6 1060.67   1
   3 -18 -12 6002.02 915.032  -2
   3  18   9 6002.02 915.032   1
   3  18  10 3020.74 582.877   1
  -3  18  13 26513.5 1221.34  -2
  -3 -18 -10 26513.5 1221.34   1
  -3  18  14 12609.3 928.569  -2
  -3 -18 -11 12609.3 928.569   1
  -3 -18  15 19094.4 813.400  -2
  -3  18 -12 19094.4 813.400   1
  -3 -18  16 33692.6 1035.22  -2
  -3  18 -13 33692.6 1035.22   1
  -3  18 -14 6008.89 484.340   1
   3  19  12 3728.92 588.621  -2
   3 -19 -15 3728.92 588.621   1
   3  19  11 8819.85 1106.47  -2
   3 -19 -14 8819.85 1106.47   1
   3 -19  10 7397.77 730.647  -2
   3  19 -13 7397.77 730.647   1
   3  19   9 22098.0 1005.38  -2
   3 -19 -12 22098.0 1005.38   1
   3  19 -11 31646.3 981.551   1
   3  19   8 38827.1 1335.51  -2
   3 -19 -11 38827.1 1335.51   1
   3  19   7 39740.1 2614.82  -2
   3 -19 -10 39740.1 2614.82   1
   3  19   6 83197.5 2094.78  -2
   3 -19  -9 83197.5 2094.78   1
   3  19   5 68769.3 5520.06  -2
   3 -19  -8 68769.3 5520.06   1
   3  19   4 131179. 3530.99  -2
   3 -19  -7 131179. 3530.99   1
   3  19   3 32739.3 3191.73  -2
   3 -19  -6 32739.3 3191.73   1
   3  19   2 94649.6 2429.80  -2
   3 -19  -5 94649.6 2429.80   1
  -3  19  -1 3387.94 1186.95  -2
  -3 -19   4 3387.94 1186.95   1
   3  19   0 50935.7 1604.80  -2
   3 -19  -3 50935.7 1604.80   1
  -3  19   1 3412.80 980.751  -2
  -3 -19   2 3412.80 980.751   1
   3 -19  -2 4313.72 1001.52  -2
   3  19  -1 4313.72 1001.52   1
   3 -19  -3 21220.3 1418.67  -2
   3  19   0 21220.3 1418.67   1
   3 -19  -4 5767.44 1061.04  -2
   3  19   1 5767.44 1061.04   1
   3 -19  -5 44467.8 1771.34  -2
   3  19   2 44467.8 1771.34   1
  -3  19   6 59240.6 1971.55  -2
  -3 -19  -3 59240.6 1971.55   1
  -3  19   7 61233.6 1950.07  -2
  -3 -19  -4 61233.6 1950.07   1
   3 -19  -8 141913. 2733.32  -2
   3  19   5 141913. 2733.32   1
   3 -19  -9 45531.5 1831.69  -2
   3  19   6 45531.5 1831.69   1
   3 -19 -10 96743.7 2120.64  -2
   3  19   7 96743.7 2120.64   1
  -3  19  11 19430.8 1150.09  -2
  -3 -19  -8 19430.8 1150.09   1
   3 -19 -12 55499.4 1590.98  -2
   3  19   9 55499.4 1590.98   1
   3 -19 -13 6287.06 808.693  -2
   3  19  10 6287.06 808.693   1
  -3  19  14 18527.5 1087.29  -2
  -3 -19 -11 18527.5 1087.29   1
  -3 -19 -12 3863.94 373.045   1
  -3 -19  15 5956.75 666.250  -2
  -3  19 -12 5956.75 666.250   1
   3  20  11 33597.3 910.470  -2
   3 -20 -14 33597.3 910.470   1
   3  20  10 57357.7 1454.54  -2
   3 -20 -13 57357.7 1454.54   1
   3  20   9 13821.4 763.865  -2
   3 -20 -12 13821.4 763.865   1
   3  20   8 36627.3 1187.63  -2
   3 -20 -11 36627.3 1187.63   1
   3  20   7 1349.95 736.444  -2
   3 -20 -10 1349.95 736.444   1
   3  20   6 9928.74 1048.38  -2
   3 -20  -9 9928.74 1048.38   1
   3  20   5 9751.67 1017.58  -2
   3 -20  -8 9751.67 1017.58   1
   3 -20   4 10194.0 1050.10  -2
   3  20  -7 10194.0 1050.10   1
   3 -20   3 37413.4 4407.18  -2
   3  20  -6 37413.4 4407.18   1
   3  20   2 36170.2 2368.25  -2
   3 -20  -5 36170.2 2368.25   1
   3  20   1 53900.4 4308.63  -2
   3 -20  -4 53900.4 4308.63   1
  -3  20   0 47508.2 1762.72  -2
  -3 -20   3 47508.2 1762.72   1
  -3  20   1 47880.4 1649.75  -2
  -3 -20   2 47880.4 1649.75   1
  -3  20   2 75517.1 2174.33  -2
  -3 -20   1 75517.1 2174.33   1
   3 -20  -3 28833.7 1452.15  -2
   3  20   0 28833.7 1452.15   1
   3 -20  -4 77599.8 2080.23  -2
   3  20   1 77599.8 2080.23   1
  -3  20   5 21607.5 1355.21  -2
  -3 -20  -2 21607.5 1355.21   1
  -3  20   6 66827.3 1914.62  -2
  -3 -20  -3 66827.3 1914.62   1
   3 -20  -7 11547.7 1195.22  -2
   3  20   4 11547.7 1195.22   1
   3 -20  -8 21006.3 1234.84  -2
   3  20   5 21006.3 1234.84   1
  -3  20   9 6737.41 924.787  -2
  -3 -20  -6 6737.41 924.787   1
   3 -20 -10 1004.96 752.242  -2
   3  20   7 1004.96 752.242   1
   3 -20 -11 21689.5 1099.46  -2
   3  20   8 21689.5 1099.46   1
   3 -20 -12 17346.9 879.798  -2
   3  20   9 17346.9 879.798   1
  -3  20  13 34407.4 861.020  -2
  -3 -20 -10 34407.4 861.020   1
  -3 -20  14 37447.5 974.557  -2
  -3  20 -11 37447.5 974.557   1
   3  21  10 4468.28 589.145  -2
   3 -21 -13 4468.28 589.145   1
   3  21   9 22032.5 819.631  -2
   3 -21 -12 22032.5 819.631   1
   3  21   8 29644.4 914.799  -2
   3 -21 -11 29644.4 914.799   1
   3  21   7 18475.6 3548.69  -2
   3 -21 -10 18475.6 3548.69   1
   3  21   6 65800.6 1563.00  -2
   3 -21  -9 65800.6 1563.00   1
   3  21   5 32063.1 3007.42  -2
   3 -21  -8 32063.1 3007.42   1
   3  21   4 78482.1 3998.59  -2
   3 -21  -7 78482.1 3998.59   1
   3  21   3 39190.8 1490.53  -2
   3 -21  -6 39190.8 1490.53   1
   3  21   2 35547.4 2883.57  -2
   3 -21  -5 35547.4 2883.57   1
   3  21   1 21989.0 1347.53  -2
   3 -21  -4 21989.0 1347.53   1
   3  21   0 20720.7 1397.58  -2
   3 -21  -3 20720.7 1397.58   1
   3  21  -1 5615.40 920.915  -2
   3 -21  -2 5615.40 920.915   1
  -3  21   2 4041.04 838.572  -2
  -3 -21   1 4041.04 838.572   1
  -3  21   3 10354.2 1094.02  -2
  -3 -21   0 10354.2 1094.02   1
  -3  21   4 18425.3 1198.65  -2
  -3 -21  -1 18425.3 1198.65   1
   3 -21  -5 18371.1 1180.28  -2
   3  21   2 18371.1 1180.28   1
   3 -21  -6 37814.9 1430.16  -2
   3  21   3 37814.9 1430.16   1
   3 -21  -7 43790.5 1431.02  -2
   3  21   4 43790.5 1431.02   1
   3 -21  -8 66121.0 1663.73  -2
   3  21   5 66121.0 1663.73   1
   3 -21  -9 56212.6 1488.25  -2
   3  21   6 56212.6 1488.25   1
  -3  21  10 43213.7 1178.71  -2
  -3 -21  -7 43213.7 1178.71   1
  -3  21  11 34291.3 1046.01  -2
  -3 -21  -8 34291.3 1046.01   1
  -3  21  12 34202.0 925.655  -2
  -3 -21  -9 34202.0 925.655   1
  -3 -21  13 6688.44 924.081  -2
  -3  21 -10 6688.44 924.081   1
   3  22   8 4879.32 559.001  -2
   3 -22 -11 4879.32 559.001   1
   3  22   7 4001.39 532.577  -2
   3 -22 -10 4001.39 532.577   1
   3  22   6 115.466 386.419  -2
   3 -22  -9 115.466 386.419   1
   3  22   5 1344.27 625.621  -2
   3 -22  -8 1344.27 625.621   1
   3  22   4 1921.98 683.059  -2
   3 -22  -7 1921.98 683.059   1
   3  22   3 3275.96 1286.02  -2
   3 -22  -6 3275.96 1286.02   1
   3  22   2 3674.78 810.367  -2
   3 -22  -5 3674.78 810.367   1
   3  22   1 22302.2 3630.04  -2
   3 -22  -4 22302.2 3630.04   1
   3  22   0 13629.0 5345.53  -2
   3 -22  -3 13629.0 5345.53   1
   3 -22  -1 29000.9 1108.72  -2
   3  22  -2 29000.9 1108.72   1
  -3  22   2 27900.8 1088.04  -2
  -3 -22   1 27900.8 1088.04   1
  -3  22   3 19118.0 1113.82  -2
  -3 -22   0 19118.0 1113.82   1
  -3  22   4 26452.2 1335.22  -2
  -3 -22  -1 26452.2 1335.22   1
  -3  22   5 3777.17 776.285  -2
  -3 -22  -2 3777.17 776.285   1
  -3  22   6 5679.87 799.321  -2
  -3 -22  -3 5679.87 799.321   1
  -3  22   7 2104.91 715.411  -2
  -3 -22  -4 2104.91 715.411   1
  -3  22   8 1507.61 652.265  -2
  -3 -22  -5 1507.61 652.265   1
  -3 -22   9 545.518 593.458  -2
  -3  22  -6 545.518 593.458   1
  -3  22  10 3838.34 630.562  -2
  -3 -22  -7 3838.34 630.562   1
  -3 -22  11 2308.15 505.197  -2
  -3  22  -8 2308.15 505.197   1
   3  23   6 3569.66 537.840  -2
   3 -23  -9 3569.66 537.840   1
   3  23   5 309.359 425.752  -2
   3 -23  -8 309.359 425.752   1
   3  23   4 2773.74 641.054  -2
   3 -23  -7 2773.74 641.054   1
   3  23   3 1964.05 611.154  -2
   3 -23  -6 1964.05 611.154   1
   3  23   2 3759.73 1557.40  -2
   3 -23  -5 3759.73 1557.40   1
   3  23   1 4429.64 768.377  -2
   3 -23  -4 4429.64 768.377   1
   3 -23   0 1271.81 613.211  -2
   3  23  -3 1271.81 613.211   1
  -3  23   1 3611.40 565.655  -2
  -3 -23   2 3611.40 565.655   1
  -3  23   2 1823.06 584.898  -2
  -3 -23   1 1823.06 584.898   1
  -3  23   3 174.781 365.477  -2
  -3 -23   0 174.781 365.477   1
  -3  23   4 3941.25 650.400  -2
  -3 -23  -1 3941.25 650.400   1
  -3  23   5 5845.60 680.820  -2
  -3 -23  -2 5845.60 680.820   1
  -3  23   6 1877.45 601.088  -2
  -3 -23  -3 1877.45 601.088   1
  -3  23   7 3178.81 593.091  -2
  -3 -23  -4 3178.81 593.091   1
  -3  23   8 458.285 531.303  -2
  -3 -23  -5 458.285 531.303   1
  -3  23   9 4125.90 631.872  -2
  -3 -23  -6 4125.90 631.872   1
   3  24   3 654.442 449.891  -2
   3 -24  -6 654.442 449.891   1
   3  24   2 792.271 550.975  -2
   3 -24  -5 792.271 550.975   1
   3 -24   1 3144.36 511.921  -2
   3  24  -4 3144.36 511.921   1
   3  24   0 213.364 491.671  -2
   3 -24  -3 213.364 491.671   1
   3  24  -1 484.005 524.007  -2
   3 -24  -2 484.005 524.007   1
   3 -24  -2 204.731 537.161  -2
   3  24  -1 204.731 537.161   1
  -3  24   3 1000.44 497.224  -2
  -3 -24   0 1000.44 497.224   1
  -3  24   4 2357.81 478.204  -2
  -3 -24  -1 2357.81 478.204   1
   3 -24  -5 2407.69 464.534  -2
   3  24   2 2407.69 464.534   1
  -3 -24  -3 810.710 331.627   1
   4   0 -23 82.2466 469.536   1
   4   0 -22 2314.99 614.480   1
   4   0 -21 287.771 672.017   1
   4   0  16 10605.8 1187.74  -2
   4   0 -20 10605.8 1187.74   1
   4   0  15 133.451 1078.27  -2
   4   0 -19 133.451 1078.27   1
   4   0  14 62119.3 1780.83  -2
   4   0 -18 62119.3 1780.83   1
   4   0  13-87.6394 1096.50  -2
   4   0 -17-87.6394 1096.50   1
   4   0  12 84801.3 2311.63  -2
   4   0 -16 84801.3 2311.63   1
   4   0  11 1718.90 1118.57  -2
   4   0 -15 1718.90 1118.57   1
  -4   0 -10 49375.1 3674.64  -2
  -4   0  14 49375.1 3674.64   1
   4   0   9 1359.56 2429.48  -2
   4   0 -13 1359.56 2429.48   1
  -4   0  -8 53086.4 5679.13  -2
  -4   0  12 53086.4 5679.13   1
   4   0   7 430.362 1411.19  -2
   4   0 -11 430.362 1411.19   1
   4   0   6 22772.1 1956.55  -2
   4   0 -10 22772.1 1956.55   1
   4   0   5-323.133 1367.46  -2
   4   0  -9-323.133 1367.46   1
   4   0   4 23932.9 1961.88  -2
   4   0  -8 23932.9 1961.88   1
   4   0   3 1007.39 1266.22  -2
   4   0  -7 1007.39 1266.22   1
   4   0  -6 26631.9 879.197   1
   4   0   2 62532.7 3473.12  -2
   4   0  -6 62532.7 3473.12   1
   4   0  -5-48.3328 415.714   1
   4   0   1 1084.46 1055.79  -2
   4   0  -5 1084.46 1055.79   1
   4   0   0 105834. 11756.3  -2
   4   0  -4 105834. 11756.3   1
   4   0  -1 366.372 917.523  -2
   4   0  -3 366.372 917.523   1
   4   0  -2 13948.6 1140.79  -2
   4   0  -2 13948.6 1140.79   1
  -4   0   3 94.8375 654.617  -2
  -4   0   1 94.8375 654.617   1
  -4   0   4 58677.2 1492.11  -2
  -4   0   0 58677.2 1492.11   1
  -4   0   5 649.421 569.903  -2
  -4   0  -1 649.421 569.903   1
   4   0  -6 67409.0 2346.57  -2
   4   0   2 67409.0 2346.57   1
   4   0  -7 1616.28 1086.26  -2
   4   0   3 1616.28 1086.26   1
   4   0  -8 14534.3 1610.41  -2
   4   0   4 14534.3 1610.41   1
   4   0  -9-364.906 1138.69  -2
   4   0   5-364.906 1138.69   1
   4   0 -10 25511.8 2090.12  -2
   4   0   6 25511.8 2090.12   1
   4   0 -12 27844.2 2399.55  -2
   4   0   8 27844.2 2399.55   1
   4   0 -13 37.1860 707.967  -2
   4   0   9 37.1860 707.967   1
   4   0 -14 26219.9 2775.47  -2
   4   0  10 26219.9 2775.47   1
  -4   0  15 645.586 1201.67  -2
  -4   0 -11 645.586 1201.67   1
  -4   0  16 44053.8 1930.83  -2
  -4   0 -12 44053.8 1930.83   1
  -4   0  17 780.890 1345.47  -2
  -4   0 -13 780.890 1345.47   1
  -4   0 -14 36626.1 1506.96   1
  -4   0  18 54696.8 2042.32  -2
  -4   0 -14 54696.8 2042.32   1
  -4   0 -15 194.112 704.207   1
  -4   0  19-129.875 1121.87  -2
  -4   0 -15-129.875 1121.87   1
  -4   0  20 14900.5 1250.60  -2
  -4   0 -16 14900.5 1250.60   1
  -4   0  21 1243.34 957.047  -2
  -4   0 -17 1243.34 957.047   1
  -4   0 -18 13341.5 880.272   1
  -4   0 -19 7.91922 497.654   1
  -4   0 -20 2989.77 424.311   1
   4  -1 -23 1465.84 486.744   1
   4  -1 -22 29448.9 1171.84   1
   4  -1 -21 379.921 668.411   1
   4   1 -20 43930.9 1564.06   1
   4   1  16 45909.3 1593.30  -2
   4  -1 -20 45909.3 1593.30   1
   4   1  15 15021.3 1290.93  -2
   4  -1 -19 15021.3 1290.93   1
   4   1  14 45520.4 1763.06  -2
   4  -1 -18 45520.4 1763.06   1
   4   1  13 22018.5 1396.19  -2
   4  -1 -17 22018.5 1396.19   1
   4   1  12 4096.13 1112.97  -2
   4  -1 -16 4096.13 1112.97   1
   4  -1 -15 18428.4 2482.64   1
   4   1  11 26075.6 1568.95  -2
   4  -1 -15 26075.6 1568.95   1
   4  -1  10 2342.34 1311.07  -2
   4   1 -14 2342.34 1311.07   1
   4   1   9 23013.7 3151.82  -2
   4  -1 -13 23013.7 3151.82   1
  -4  -1  -8 16824.3 1947.56  -2
  -4   1  12 16824.3 1947.56   1
   4   1   7 18475.6 1854.65  -2
   4  -1 -11 18475.6 1854.65   1
   4   1   6 110695. 3889.33  -2
   4  -1 -10 110695. 3889.33   1
  -4  -1  -5 29506.9 2003.77  -2
  -4   1   9 29506.9 2003.77   1
   4   1   4 207971. 4334.02  -2
   4  -1  -8 207971. 4334.02   1
   4   1   3 74537.8 2953.37  -2
   4  -1  -7 74537.8 2953.37   1
   4   1  -6 233542. 2488.08   1
   4   1   2 216537. 4469.79  -2
   4  -1  -6 216537. 4469.79   1
   4   1  -5 9500.92 696.888   1
  -4  -1  -1 21004.4 1906.18  -2
  -4   1   5 21004.4 1906.18   1
   4   1   0 53665.7 1573.84  -2
   4  -1  -4 53665.7 1573.84   1
   4   1  -1 25606.5 1334.07  -2
   4  -1  -3 25606.5 1334.07   1
   4   1  -2 6072.72 928.291  -2
   4  -1  -2 6072.72 928.291   1
   4   1  -3 25093.3 1072.13  -2
   4  -1  -1 25093.3 1072.13   1
   4  -1  -4 29275.6 1131.42  -2
   4   1   0 29275.6 1131.42   1
   4   1  -5 22793.2 1052.09  -2
   4  -1   1 22793.2 1052.09   1
   4   1  -6 130305. 3143.48  -2
   4  -1   2 130305. 3143.48   1
   4   1  -7 124910. 3261.42  -2
   4  -1   3 124910. 3261.42   1
   4   1  -8 169715. 3936.19  -2
   4  -1   4 169715. 3936.19   1
   4  -1  -9 37111.1 2166.47  -2
   4   1   5 37111.1 2166.47   1
   4   1 -10 124871. 3687.96  -2
   4  -1   6 124871. 3687.96   1
   4   1 -11 10075.0 1707.09  -2
   4  -1   7 10075.0 1707.09   1
   4   1 -12 27788.4 2373.82  -2
   4  -1   8 27788.4 2373.82   1
   4   1 -13 14997.7 2877.21  -2
   4  -1   9 14997.7 2877.21   1
  -4  -1  14 1700.83 2335.05  -2
  -4   1 -10 1700.83 2335.05   1
   4   1  11 15527.1 1392.18   1
  -4   1  15 20154.5 1728.99  -2
  -4  -1 -11 20154.5 1728.99   1
  -4  -1  16 3202.84 1276.14  -2
  -4   1 -12 3202.84 1276.14   1
  -4  -1 -13 18873.8 1220.04   1
  -4  -1  17 23693.5 1688.57  -2
  -4   1 -13 23693.5 1688.57   1
  -4   1 -14 4507.56 951.520   1
  -4  -1  18 25465.4 1667.11  -2
  -4   1 -14 25465.4 1667.11   1
  -4   1  19 26512.1 1513.79  -2
  -4  -1 -15 26512.1 1513.79   1
  -4   1 -16 796.505 713.792   1
  -4  -1  20 22091.8 1538.83  -2
  -4   1 -16 22091.8 1538.83   1
  -4  -1 -17 17679.5 1084.15   1
  -4  -1 -18 2490.88 667.401   1
  -4  -1 -19 870.771 502.119   1
  -4  -1 -20 1259.29 388.500   1
   4  -2 -23 5996.70 652.050   1
   4  -2 -22 2267.72 612.256   1
   4  -2 -21 19841.9 1230.41   1
   4   2 -20 86.9491 868.430   1
   4   2  16 10510.9 1083.29  -2
   4  -2 -20 10510.9 1083.29   1
   4   2 -19 36855.1 1647.28   1
   4   2  15 37341.4 1490.18  -2
   4  -2 -19 37341.4 1490.18   1
   4   2  14 11838.9 1270.06  -2
   4  -2 -18 11838.9 1270.06   1
   4   2  13 42110.9 1723.44  -2
   4  -2 -17 42110.9 1723.44   1
   4   2  12 21127.3 1300.13  -2
   4  -2 -16 21127.3 1300.13   1
   4  -2  11 21055.2 1436.16  -2
   4   2 -15 21055.2 1436.16   1
   4  -2  10 24942.8 1487.79  -2
   4   2 -14 24942.8 1487.79   1
  -4   2  -9 30538.8 2236.30  -2
  -4  -2  13 30538.8 2236.30   1
  -4   2  -8 38097.4 2384.74  -2
  -4  -2  12 38097.4 2384.74   1
   4  -2   7 113035. 3508.80  -2
   4   2 -11 113035. 3508.80   1
  -4  -2  -6 49590.9 2360.28  -2
  -4   2  10 49590.9 2360.28   1
   4   2   5 167532. 3880.47  -2
   4  -2  -9 167532. 3880.47   1
   4   2   4 59488.9 2520.38  -2
   4  -2  -8 59488.9 2520.38   1
   4   2   3 218583. 4131.99  -2
   4  -2  -7 218583. 4131.99   1
   4   2  -6 105.594 501.997   1
   4   2   2 22919.4 1640.73  -2
   4  -2  -6 22919.4 1640.73   1
   4   2  -5 105391. 1940.85   1
  -4   2  -1 99520.2 2558.42  -2
  -4  -2   5 99520.2 2558.42   1
   4   2   0 3804.68 1043.15  -2
   4  -2  -4 3804.68 1043.15   1
   4   2  -1 48041.7 2316.49  -2
   4  -2  -3 48041.7 2316.49   1
   4   2  -2 784.970 805.111  -2
   4  -2  -2 784.970 805.111   1
   4   2  -3 32444.6 1106.66  -2
   4  -2  -1 32444.6 1106.66   1
  -4   2   0 4984.79 357.771   1
  -4   2   4 5517.82 943.439  -2
  -4  -2   0 5517.82 943.439   1
   4  -2  -5 50101.8 2085.23  -2
   4   2   1 50101.8 2085.23   1
   4   2  -6 40540.4 2942.19  -2
   4  -2   2 40540.4 2942.19   1
   4   2  -7 128323. 9384.67  -2
   4  -2   3 128323. 9384.67   1
   4  -2  -8 89603.1 2881.97  -2
   4   2   4 89603.1 2881.97   1
   4   2  -9 172494. 4192.98  -2
   4  -2   5 172494. 4192.98   1
   4   2 -10 58073.9 5864.38  -2
   4  -2   6 58073.9 5864.38   1
   4   2 -11 161122. 8513.15  -2
   4  -2   7 161122. 8513.15   1
   4  -2 -12 33833.4 2411.37  -2
   4   2   8 33833.4 2411.37   1
   4  -2 -13 69480.2 5102.74  -2
   4   2   9 69480.2 5102.74   1
   4   2  10 727.366 942.726   1
   4   2 -14 13131.0 2751.70  -2
   4  -2  10 13131.0 2751.70   1
   4   2  11 21737.7 1542.98   1
  -4  -2  15 22938.8 1757.83  -2
  -4   2 -11 22938.8 1757.83   1
  -4  -2  16 10406.3 1527.65  -2
  -4   2 -12 10406.3 1527.65   1
  -4   2 -13 19418.0 1330.10   1
  -4   2  17 33675.5 1837.42  -2
  -4  -2 -13 33675.5 1837.42   1
  -4   2 -14 7640.96 1039.38   1
  -4   2  18 12094.8 1470.84  -2
  -4  -2 -14 12094.8 1470.84   1
  -4   2 -15 641.765 854.308   1
  -4  -2  19 17722.0 1392.12  -2
  -4   2 -15 17722.0 1392.12   1
  -4  -2 -16 20708.3 1119.05   1
  -4  -2  20 21003.0 1403.59  -2
  -4   2 -16 21003.0 1403.59   1
  -4   2 -17 14704.9 1375.44   1
  -4   2  21 24639.1 1216.26  -2
  -4  -2 -17 24639.1 1216.26   1
  -4  -2 -18 20823.1 964.411   1
  -4  -2 -19 28121.1 1152.62   1
  -4   2 -20 10313.3 564.069   1
   4  -3 -23 4139.52 470.573   1
   4  -3 -22 4511.06 615.320   1
   4  -3 -21 832.190 653.371   1
   4   3 -20 7244.37 1012.67   1
   4  -3  16 13538.1 1152.82  -2
   4   3 -20 13538.1 1152.82   1
   4   3  15 71528.1 1856.35  -2
   4  -3 -19 71528.1 1856.35   1
   4   3  14 54017.3 1801.25  -2
   4  -3 -18 54017.3 1801.25   1
   4   3  13 74844.0 2056.75  -2
   4  -3 -17 74844.0 2056.75   1
   4   3  12 45320.1 1768.05  -2
   4  -3 -16 45320.1 1768.05   1
   4   3  11 70316.5 2174.36  -2
   4  -3 -15 70316.5 2174.36   1
   4  -3  10 38166.5 1945.78  -2
   4   3 -14 38166.5 1945.78   1
  -4   3  -9 109563. 3417.89  -2
  -4  -3  13 109563. 3417.89   1
  -4   3  -8 7974.51 1751.41  -2
  -4  -3  12 7974.51 1751.41   1
   4   3   7 77635.0 3075.86  -2
   4  -3 -11 77635.0 3075.86   1
   4  -3   6 6585.78 1546.83  -2
   4   3 -10 6585.78 1546.83   1
   4   3   5 59981.5 2533.17  -2
   4  -3  -9 59981.5 2533.17   1
   4   3   4 8026.37 1499.03  -2
   4  -3  -8 8026.37 1499.03   1
   4   3   3 158407. 3714.32  -2
   4  -3  -7 158407. 3714.32   1
   4   3  -6 107643. 2009.37   1
   4   3   2 98737.4 2780.14  -2
   4  -3  -6 98737.4 2780.14   1
   4  -3   1 88987.9 2759.38  -2
   4   3  -5 88987.9 2759.38   1
   4   3   0 118988. 2983.58  -2
   4  -3  -4 118988. 2983.58   1
   4   3  -1 154717. 3815.84  -2
   4  -3  -3 154717. 3815.84   1
   4   3  -2 148492. 3035.41  -2
   4  -3  -2 148492. 3035.41   1
   4   3  -3 200302. 3205.11  -2
   4  -3  -1 200302. 3205.11   1
   4  -3  -4 75946.4 2067.41  -2
   4   3   0 75946.4 2067.41   1
   4  -3  -5 147035. 9976.26  -2
   4   3   1 147035. 9976.26   1
   4   3  -6 52061.3 2506.51  -2
   4  -3   2 52061.3 2506.51   1
   4  -3  -7 283167. 12953.8  -2
   4   3   3 283167. 12953.8   1
   4   3  -8 12115.4 1501.41  -2
   4  -3   4 12115.4 1501.41   1
   4  -3  -9 47627.7 2295.70  -2
   4   3   5 47627.7 2295.70   1
   4   3 -10 9004.14 1490.13  -2
   4  -3   6 9004.14 1490.13   1
   4  -3 -11 46763.2 2368.42  -2
   4   3   7 46763.2 2368.42   1
   4   3 -12 11764.3 2307.17  -2
   4  -3   8 11764.3 2307.17   1
   4  -3 -13 72320.6 10561.4  -2
   4   3   9 72320.6 10561.4   1
   4   3 -14 33068.8 2192.38  -2
   4  -3  10 33068.8 2192.38   1
   4   3  11 63476.5 2455.61   1
  -4   3  15 76675.5 2805.82  -2
  -4  -3 -11 76675.5 2805.82   1
  -4   3  16 26068.3 1637.68  -2
  -4  -3 -12 26068.3 1637.68   1
  -4   3  17 113143. 3296.11  -2
  -4  -3 -13 113143. 3296.11   1
  -4   3  18 34834.6 1669.85  -2
  -4  -3 -14 34834.6 1669.85   1
  -4   3 -15 111323. 2294.52   1
  -4   3  19 122295. 2547.56  -2
  -4  -3 -15 122295. 2547.56   1
  -4   3 -16 12385.4 959.347   1
  -4  -3  20 13779.3 1223.60  -2
  -4   3 -16 13779.3 1223.60   1
  -4  -3 -17 55717.8 1503.56   1
  -4  -3 -18 7070.49 713.648   1
  -4   3 -19 4111.88 643.121   1
  -4   3 -20 588.453 408.530   1
   4   4 -23 21671.3 793.098   1
   4   4 -22 4101.12 671.664   1
   4  -4 -21 28200.6 1069.18   1
   4   4 -20 9246.30 1030.08   1
   4   4  16 15607.8 1055.58  -2
   4  -4 -20 15607.8 1055.58   1
   4   4  15 19538.9 1239.76  -2
   4  -4 -19 19538.9 1239.76   1
   4   4  14 30776.2 1488.73  -2
   4  -4 -18 30776.2 1488.73   1
   4   4  13 11621.1 1241.28  -2
   4  -4 -17 11621.1 1241.28   1
   4   4  12 19602.2 1391.85  -2
   4  -4 -16 19602.2 1391.85   1
   4   4  11 16294.3 1545.47  -2
   4  -4 -15 16294.3 1545.47   1
  -4   4 -10 40927.2 2157.36  -2
  -4  -4  14 40927.2 2157.36   1
   4   4 -13-400.827 2135.48   1
   4   4   9 31784.6 3047.13  -2
   4  -4 -13 31784.6 3047.13   1
  -4   4  -8 95058.0 3062.49  -2
  -4  -4  12 95058.0 3062.49   1
  -4   4  -7 131175. 3746.30  -2
  -4  -4  11 131175. 3746.30   1
  -4  -4  -6 105813. 3313.32  -2
  -4   4  10 105813. 3313.32   1
  -4   4  -5 164375. 3765.18  -2
  -4  -4   9 164375. 3765.18   1
   4   4   4 72354.3 2556.06  -2
   4  -4  -8 72354.3 2556.06   1
   4   4   3 256903. 4275.65  -2
   4  -4  -7 256903. 4275.65   1
   4   4  -6 223929. 3057.36   1
   4   4   2 198384. 3910.13  -2
   4  -4  -6 198384. 3910.13   1
   4   4   1 68292.6 2504.79  -2
   4  -4  -5 68292.6 2504.79   1
   4   4   0 129460. 2973.25  -2
   4  -4  -4 129460. 2973.25   1
   4   4  -1 48110.8 1792.68  -2
   4  -4  -3 48110.8 1792.68   1
   4   4  -2 28959.0 1984.39  -2
   4  -4  -2 28959.0 1984.39   1
   4  -4  -3 26823.0 1463.24  -2
   4   4  -1 26823.0 1463.24   1
   4  -4  -4 63698.5 2169.24  -2
   4   4   0 63698.5 2169.24   1
   4  -4  -5 51509.4 2280.03  -2
   4   4   1 51509.4 2280.03   1
   4  -4  -6 114077. 3603.10  -2
   4   4   2 114077. 3603.10   1
   4  -4  -7 263310. 4918.57  -2
   4   4   3 263310. 4918.57   1
   4  -4  -8 89821.3 2607.39  -2
   4   4   4 89821.3 2607.39   1
   4  -4  -9 164322. 8261.80  -2
   4   4   5 164322. 8261.80   1
   4  -4 -10 156533. 13429.0  -2
   4   4   6 156533. 13429.0   1
   4  -4 -11 128029. 11622.1  -2
   4   4   7 128029. 11622.1   1
   4  -4 -12 161704. 9920.63  -2
   4   4   8 161704. 9920.63   1
   4  -4 -13 68469.9 3220.24  -2
   4   4   9 68469.9 3220.24   1
   4  -4 -14 83903.0 2818.78  -2
   4   4  10 83903.0 2818.78   1
   4   4  11 34596.3 1941.52   1
   4   4 -15 31873.3 2516.85  -2
   4  -4  11 31873.3 2516.85   1
  -4   4  16 25203.7 1711.98  -2
  -4  -4 -12 25203.7 1711.98   1
  -4   4  17 12279.4 1452.13  -2
  -4  -4 -13 12279.4 1452.13   1
  -4   4 -14 1060.19 940.751   1
  -4   4  18 14990.0 1388.05  -2
  -4  -4 -14 14990.0 1388.05   1
  -4   4  19 11386.6 1206.14  -2
  -4  -4 -15 11386.6 1206.14   1
  -4  -4 -16 13284.8 932.720   1
  -4  -4  20 20300.6 2712.04  -2
  -4   4 -16 20300.6 2712.04   1
  -4  -4 -17 18140.1 927.546   1
  -4  -4  21 30974.3 1432.07  -2
  -4   4 -17 30974.3 1432.07   1
  -4   4 -18 40314.6 4489.10   1
  -4   4 -19 25535.5 912.974   1
   4   5 -23 615.075 442.974   1
   4   5 -22 869.487 554.824   1
   4   5 -21 17325.5 937.584   1
   4  -5  16 14400.2 981.211  -2
   4   5 -20 14400.2 981.211   1
   4   5  15 41577.6 1505.73  -2
   4  -5 -19 41577.6 1505.73   1
   4   5  14 35809.7 1504.82  -2
   4  -5 -18 35809.7 1504.82   1
   4   5  13 77041.0 2050.10  -2
   4  -5 -17 77041.0 2050.10   1
   4   5  12 95493.1 2244.05  -2
   4  -5 -16 95493.1 2244.05   1
   4  -5  11 76742.8 2135.13  -2
   4   5 -15 76742.8 2135.13   1
   4   5 -14 100796. 4909.47   1
   4  -5  10 111170. 2728.26  -2
   4   5 -14 111170. 2728.26   1
  -4  -5  -9 29862.5 2387.58  -2
  -4   5  13 29862.5 2387.58   1
  -4  -5  -8 75498.9 3131.16  -2
  -4   5  12 75498.9 3131.16   1
  -4   5  -7 8232.86 1743.91  -2
  -4  -5  11 8232.86 1743.91   1
  -4   5  -6 22730.9 1971.02  -2
  -4  -5  10 22730.9 1971.02   1
  -4   5  -5 3960.81 1423.71  -2
  -4  -5   9 3960.81 1423.71   1
   4   5   4 37341.7 2446.07  -2
   4  -5  -8 37341.7 2446.07   1
   4   5   3 40211.5 2160.13  -2
   4  -5  -7 40211.5 2160.13   1
   4  -5   2 59635.0 2660.82  -2
   4   5  -6 59635.0 2660.82   1
   4   5   1 87550.9 2573.01  -2
   4  -5  -5 87550.9 2573.01   1
   4   5   0 74051.2 2544.61  -2
   4  -5  -4 74051.2 2544.61   1
   4   5  -1 92943.6 2614.49  -2
   4  -5  -3 92943.6 2614.49   1
  -4   5   2 156148. 1866.79   1
  -4   5   2 238609. 4081.10  -2
  -4  -5   2 238609. 4081.10   1
   4  -5  -3 156380. 3102.37  -2
   4   5  -1 156380. 3102.37   1
   4  -5  -4 110681. 2932.03  -2
   4   5   0 110681. 2932.03   1
   4  -5  -5 155265. 3355.71  -2
   4   5   1 155265. 3355.71   1
   4  -5  -6 110735. 5043.73  -2
   4   5   2 110735. 5043.73   1
   4  -5  -7 52376.0 2494.91  -2
   4   5   3 52376.0 2494.91   1
   4  -5  -8 68692.6 7095.27  -2
   4   5   4 68692.6 7095.27   1
   4  -5  -9 8155.02 2610.41  -2
   4   5   5 8155.02 2610.41   1
   4  -5 -10 29233.0 4795.65  -2
   4   5   6 29233.0 4795.65   1
   4   5 -11 3428.13 1707.92  -2
   4  -5   7 3428.13 1707.92   1
   4  -5 -12 42600.7 2986.35  -2
   4   5   8 42600.7 2986.35   1
   4   5 -13 23492.1 2474.20  -2
   4  -5   9 23492.1 2474.20   1
   4  -5 -14 90272.9 2912.13  -2
   4   5  10 90272.9 2912.13   1
   4   5  11 93186.4 3050.91   1
  -4  -5  15 97223.1 2723.33  -2
  -4   5 -11 97223.1 2723.33   1
  -4  -5  16 82733.4 2281.41  -2
  -4   5 -12 82733.4 2281.41   1
  -4   5 -13 91383.6 1942.27   1
  -4  -5  17 103636. 2391.70  -2
  -4   5 -13 103636. 2391.70   1
  -4   5  18 56384.9 1891.30  -2
  -4  -5 -14 56384.9 1891.30   1
  -4   5 -15 30669.6 1381.74   1
  -4  -5  19 44529.3 1787.71  -2
  -4   5 -15 44529.3 1787.71   1
  -4   5 -16 29055.9 1247.18   1
  -4  -5  20 34102.6 1562.96  -2
  -4   5 -16 34102.6 1562.96   1
  -4   5 -17 16492.4 1412.22   1
  -4   5 -18 18566.7 1498.77   1
  -4   5 -19 1244.60 514.161   1
   4   6 -23 7675.74 526.629   1
   4   6 -22 3729.93 586.512   1
   4   6 -21 2085.71 607.271   1
   4  -6  16 24656.4 1157.52  -2
   4   6 -20 24656.4 1157.52   1
   4  -6  15 2695.61 903.450  -2
   4   6 -19 2695.61 903.450   1
   4  -6  14 30373.5 1447.17  -2
   4   6 -18 30373.5 1447.17   1
   4  -6  13 2663.29 1187.97  -2
   4   6 -17 2663.29 1187.97   1
   4  -6  12 31189.9 1559.18  -2
   4   6 -16 31189.9 1559.18   1
   4  -6  11 16268.5 1570.49  -2
   4   6 -15 16268.5 1570.49   1
   4  -6  10 52074.3 2330.58  -2
   4   6 -14 52074.3 2330.58   1
   4  -6   9 35017.9 1810.78  -2
   4   6 -13 35017.9 1810.78   1
  -4   6  -8 71417.9 3150.33  -2
  -4  -6  12 71417.9 3150.33   1
   4  -6   7 79690.0 2849.27  -2
   4   6 -11 79690.0 2849.27   1
   4   6   6 53150.5 3648.19  -2
   4  -6 -10 53150.5 3648.19   1
  -4   6  -5 82314.0 2700.39  -2
  -4  -6   9 82314.0 2700.39   1
  -4   6  -4 70090.3 2917.53  -2
  -4  -6   8 70090.3 2917.53   1
   4   6  -7 33149.6 1383.07   1
   4   6   3 76806.7 2959.83  -2
   4  -6  -7 76806.7 2959.83   1
   4   6  -6 120903. 2547.09   1
   4   6   2 107796. 3014.94  -2
   4  -6  -6 107796. 3014.94   1
   4   6   1 44530.1 2332.49  -2
   4  -6  -5 44530.1 2332.49   1
   4   6   0 163939. 3694.18  -2
   4  -6  -4 163939. 3694.18   1
   4   6  -1 27178.5 1546.52  -2
   4  -6  -3 27178.5 1546.52   1
   4   6  -2 70689.9 2584.82  -2
   4  -6  -2 70689.9 2584.82   1
   4  -6  -3 45306.4 2158.05  -2
   4   6  -1 45306.4 2158.05   1
   4  -6  -4 86977.3 2715.92  -2
   4   6   0 86977.3 2715.92   1
  -4   6   5 73261.8 6162.12  -2
  -4  -6  -1 73261.8 6162.12   1
   4  -6  -6 69880.0 3182.20  -2
   4   6   2 69880.0 3182.20   1
   4  -6  -7 104956. 10576.9  -2
   4   6   3 104956. 10576.9   1
   4   6  -8 69618.1 3730.64  -2
   4  -6   4 69618.1 3730.64   1
   4  -6  -9 61925.6 5842.99  -2
   4   6   5 61925.6 5842.99   1
   4  -6 -10 82934.4 3739.75  -2
   4   6   6 82934.4 3739.75   1
   4  -6 -11 52113.9 2949.69  -2
   4   6   7 52113.9 2949.69   1
   4  -6 -12 163239. 4525.84  -2
   4   6   8 163239. 4525.84   1
  -4  -6  13 26797.2 2036.92  -2
  -4   6  -9 26797.2 2036.92   1
   4   6  10 76552.1 2792.06   1
  -4  -6  14 79214.7 2335.23  -2
  -4   6 -10 79214.7 2335.23   1
  -4  -6  15 12464.0 1553.41  -2
  -4   6 -11 12464.0 1553.41   1
  -4  -6  16 29241.5 1739.00  -2
  -4   6 -12 29241.5 1739.00   1
  -4   6 -13 3242.47 807.340   1
  -4  -6  17 5450.16 1170.20  -2
  -4   6 -13 5450.16 1170.20   1
  -4   6 -14 2303.17 720.020   1
  -4  -6  18 16655.4 1424.00  -2
  -4   6 -14 16655.4 1424.00   1
  -4   6 -15 4653.23 898.258   1
  -4  -6  19 6078.76 1244.73  -2
  -4   6 -15 6078.76 1244.73   1
  -4   6 -16 1662.88 794.195   1
  -4  -6  20 13320.9 1225.10  -2
  -4   6 -16 13320.9 1225.10   1
  -4   6 -17 1755.46 680.713   1
  -4   6 -18 5059.65 619.954   1
  -4   6 -19 7383.51 1304.54   1
   4   7 -23 19127.1 623.022   1
   4   7 -22 202.659 471.941   1
   4   7 -21 32003.9 1060.95   1
   4  -7  16 1740.67 770.014  -2
   4   7 -20 1740.67 770.014   1
   4  -7  15 23765.0 1336.90  -2
   4   7 -19 23765.0 1336.90   1
   4  -7  14 3153.98 929.748  -2
   4   7 -18 3153.98 929.748   1
   4  -7  13 18986.5 1297.60  -2
   4   7 -17 18986.5 1297.60   1
   4  -7  12 20377.7 1339.62  -2
   4   7 -16 20377.7 1339.62   1
   4  -7  11 19567.4 1524.26  -2
   4   7 -15 19567.4 1524.26   1
   4  -7  10 6200.67 1856.07  -2
   4   7 -14 6200.67 1856.07   1
   4  -7   9 33737.4 1828.11  -2
   4   7 -13 33737.4 1828.11   1
  -4  -7  -8 15403.8 2085.63  -2
  -4   7  12 15403.8 2085.63   1
   4  -7   7 38672.4 2619.06  -2
   4   7 -11 38672.4 2619.06   1
  -4   7  -6 10061.7 1736.53  -2
  -4  -7  10 10061.7 1736.53   1
   4   7   5 62678.2 2600.01  -2
   4  -7  -9 62678.2 2600.01   1
   4   7   4 2843.64 1384.07  -2
   4  -7  -8 2843.64 1384.07   1
   4   7   3 67883.8 2695.78  -2
   4  -7  -7 67883.8 2695.78   1
   4   7   2 7852.44 1307.96  -2
   4  -7  -6 7852.44 1307.96   1
   4  -7   1 20185.4 1647.73  -2
   4   7  -5 20185.4 1647.73   1
   4   7   0 26702.3 1848.42  -2
   4  -7  -4 26702.3 1848.42   1
   4   7  -1 17627.0 1681.87  -2
   4  -7  -3 17627.0 1681.87   1
   4   7  -2 16063.1 1525.62  -2
   4  -7  -2 16063.1 1525.62   1
   4   7  -3 10731.4 1416.56  -2
   4  -7  -1 10731.4 1416.56   1
   4  -7  -4 45475.0 2130.41  -2
   4   7   0 45475.0 2130.41   1
   4  -7  -5 9979.40 1274.35  -2
   4   7   1 9979.40 1274.35   1
   4  -7  -6 9879.24 1638.03  -2
   4   7   2 9879.24 1638.03   1
   4  -7  -7 40045.8 2422.81  -2
   4   7   3 40045.8 2422.81   1
   4   7  -8 3950.17 1555.25  -2
   4  -7   4 3950.17 1555.25   1
   4  -7  -9 47380.3 2706.71  -2
   4   7   5 47380.3 2706.71   1
   4  -7 -10 14906.4 1990.81  -2
   4   7   6 14906.4 1990.81   1
   4  -7 -11 25557.0 2357.65  -2
   4   7   7 25557.0 2357.65   1
   4  -7 -12 11725.7 2060.41  -2
   4   7   8 11725.7 2060.41   1
   4   7   9 50033.8 2340.97   1
  -4  -7  13 53101.3 2881.63  -2
  -4   7  -9 53101.3 2881.63   1
  -4  -7  14 5488.68 1462.61  -2
  -4   7 -10 5488.68 1462.61   1
  -4  -7  15 25977.4 1793.69  -2
  -4   7 -11 25977.4 1793.69   1
  -4  -7  16 26439.4 1526.68  -2
  -4   7 -12 26439.4 1526.68   1
  -4  -7  17 16761.4 1691.83  -2
  -4   7 -13 16761.4 1691.83   1
  -4   7 -14 5564.86 826.452   1
  -4  -7  18 7534.42 1342.89  -2
  -4   7 -14 7534.42 1342.89   1
  -4   7 -15 3545.03 655.236   1
  -4  -7  19 14081.0 2062.86  -2
  -4   7 -15 14081.0 2062.86   1
  -4   7 -16 2875.51 836.095   1
  -4  -7  20 4142.84 957.336  -2
  -4   7 -16 4142.84 957.336   1
  -4   7 -17 2131.40 702.820   1
  -4   7 -18 7336.32 620.427   1
  -4   7 -19 2079.20 407.831   1
   4   8 -22 540.145 418.712   1
   4   8 -21 3885.08 599.766   1
   4   8 -20 665.797 620.595   1
   4  -8  16 23.7703 567.850  -2
   4   8 -20 23.7703 567.850   1
   4   8 -19 7642.66 730.110   1
   4  -8  15 11360.8 991.002  -2
   4   8 -19 11360.8 991.002   1
   4  -8  14 541.414 869.802  -2
   4   8 -18 541.414 869.802   1
   4  -8  13 19893.0 1257.01  -2
   4   8 -17 19893.0 1257.01   1
   4  -8  12 4325.52 1090.03  -2
   4   8 -16 4325.52 1090.03   1
   4  -8  11 65401.2 1953.20  -2
   4   8 -15 65401.2 1953.20   1
   4  -8  10 4072.07 1140.70  -2
   4   8 -14 4072.07 1140.70   1
   4  -8   9 101941. 2797.21  -2
   4   8 -13 101941. 2797.21   1
  -4   8  -8 10480.3 1651.93  -2
  -4  -8  12 10480.3 1651.93   1
  -4  -8  -7 42464.7 2448.39  -2
  -4   8  11 42464.7 2448.39   1
  -4  -8  -6 2263.36 1657.45  -2
  -4   8  10 2263.36 1657.45   1
  -4   8  -5 5223.67 1692.29  -2
  -4  -8   9 5223.67 1692.29   1
   4   8   4 1264.36 1376.78  -2
   4  -8  -8 1264.36 1376.78   1
   4   8   3 21025.5 1832.72  -2
   4  -8  -7 21025.5 1832.72   1
  -4   8  -2 3782.47 1336.10  -2
  -4  -8   6 3782.47 1336.10   1
   4   8   1 45612.1 2460.12  -2
   4  -8  -5 45612.1 2460.12   1
   4  -8   0 8780.22 1482.82  -2
   4   8  -4 8780.22 1482.82   1
   4   8  -1 111828. 3308.44  -2
   4  -8  -3 111828. 3308.44   1
   4   8  -2 14729.8 1683.64  -2
   4  -8  -2 14729.8 1683.64   1
   4   8  -3 152618. 3928.99  -2
   4  -8  -1 152618. 3928.99   1
  -4   8   4 5407.92 1310.58  -2
  -4  -8   0 5407.92 1310.58   1
   4  -8  -5 89198.4 8847.13  -2
   4   8   1 89198.4 8847.13   1
   4  -8  -6 2447.34 1390.81  -2
   4   8   2 2447.34 1390.81   1
   4  -8  -7 47510.9 3183.42  -2
   4   8   3 47510.9 3183.42   1
   4  -8  -8 437.229 1419.32  -2
   4   8   4 437.229 1419.32   1
   4  -8  -9 2503.56 1529.00  -2
   4   8   5 2503.56 1529.00   1
   4  -8 -10 3272.40 1645.14  -2
   4   8   6 3272.40 1645.14   1
   4  -8 -11 26068.5 2391.46  -2
   4   8   7 26068.5 2391.46   1
  -4  -8  12 4271.31 1425.84  -2
  -4   8  -8 4271.31 1425.84   1
  -4  -8  13 70970.1 2544.58  -2
  -4   8  -9 70970.1 2544.58   1
   4   8  10-4764.37 1475.64   1
  -4  -8  14 827.155 787.387  -2
  -4   8 -10 827.155 787.387   1
  -4  -8  15 48874.8 2229.29  -2
  -4   8 -11 48874.8 2229.29   1
  -4  -8  16 2142.19 1105.86  -2
  -4   8 -12 2142.19 1105.86   1
  -4  -8  17 19036.6 1413.16  -2
  -4   8 -13 19036.6 1413.16   1
  -4  -8  18 747.467 1001.11  -2
  -4   8 -14 747.467 1001.11   1
  -4   8 -15 4954.68 1349.96   1
  -4  -8  19 11397.7 1195.63  -2
  -4   8 -15 11397.7 1195.63   1
  -4   8 -16-217.695 622.169   1
  -4  -8  20 8.68051 894.921  -2
  -4   8 -16 8.68051 894.921   1
  -4   8 -17 604.235 593.029   1
  -4   8 -18 332.115 461.728   1
   4   9 -22 105.089 353.554   1
   4   9 -21 21313.0 948.212   1
   4   9 -20 624.629 420.586   1
   4  -9  16 5115.47 1237.98  -2
   4   9 -20 5115.47 1237.98   1
   4   9 -19 11275.9 818.193   1
   4  -9  15 15603.0 967.867  -2
   4   9 -19 15603.0 967.867   1
   4  -9  14 8839.12 966.919  -2
   4   9 -18 8839.12 966.919   1
   4  -9  13 16488.6 1206.55  -2
   4   9 -17 16488.6 1206.55   1
   4  -9  12 21418.2 1313.34  -2
   4   9 -16 21418.2 1313.34   1
   4  -9  11 4199.97 1073.83  -2
   4   9 -15 4199.97 1073.83   1
   4  -9  10 42107.7 1896.23  -2
   4   9 -14 42107.7 1896.23   1
   4  -9   9 29135.6 1744.80  -2
   4   9 -13 29135.6 1744.80   1
   4  -9   8 34069.3 2129.65  -2
   4   9 -12 34069.3 2129.65   1
   4  -9   7 67669.8 2599.81  -2
   4   9 -11 67669.8 2599.81   1
  -4   9  -6 16502.3 2183.48  -2
  -4  -9  10 16502.3 2183.48   1
  -4   9  -5 45036.7 3680.04  -2
  -4  -9   9 45036.7 3680.04   1
   4   9   4 7208.23 1767.38  -2
   4  -9  -8 7208.23 1767.38   1
   4   9   3 36305.9 2400.86  -2
   4  -9  -7 36305.9 2400.86   1
   4   9   2 25659.5 2037.65  -2
   4  -9  -6 25659.5 2037.65   1
   4   9   1 28251.8 2086.83  -2
   4  -9  -5 28251.8 2086.83   1
   4   9   0 55881.5 2629.59  -2
   4  -9  -4 55881.5 2629.59   1
   4  -9  -1 68892.5 2865.81  -2
   4   9  -3 68892.5 2865.81   1
   4   9  -2 98270.8 3386.52  -2
   4  -9  -2 98270.8 3386.52   1
   4   9  -3 30739.7 2034.14  -2
   4  -9  -1 30739.7 2034.14   1
  -4   9   4 76419.9 6666.14  -2
  -4  -9   0 76419.9 6666.14   1
   4  -9  -5 21637.0 2050.04  -2
   4   9   1 21637.0 2050.04   1
   4  -9  -6 53960.8 9500.20  -2
   4   9   2 53960.8 9500.20   1
   4   9  -7 24514.9 2181.00  -2
   4  -9   3 24514.9 2181.00   1
   4  -9  -8 9577.18 1874.40  -2
   4   9   4 9577.18 1874.40   1
   4  -9  -9 35179.7 4839.60  -2
   4   9   5 35179.7 4839.60   1
   4   9 -10 12572.0 2058.67  -2
   4  -9   6 12572.0 2058.67   1
  -4  -9  11 46918.6 2415.30  -2
  -4   9  -7 46918.6 2415.30   1
  -4  -9  12 18933.5 1624.79  -2
  -4   9  -8 18933.5 1624.79   1
  -4   9  13 44773.8 1896.63  -2
  -4  -9  -9 44773.8 1896.63   1
  -4  -9  14 43795.3 1887.23  -2
  -4   9 -10 43795.3 1887.23   1
  -4  -9  15 5203.32 1213.07  -2
  -4   9 -11 5203.32 1213.07   1
  -4  -9  16 31583.4 1586.75  -2
  -4   9 -12 31583.4 1586.75   1
  -4  -9  17 7869.25 1116.42  -2
  -4   9 -13 7869.25 1116.42   1
  -4  -9  18 17689.5 1282.32  -2
  -4   9 -14 17689.5 1282.32   1
  -4   9 -15 1010.45 670.470   1
  -4  -9  19 7325.83 1066.68  -2
  -4   9 -15 7325.83 1066.68   1
  -4   9 -16 9058.30 740.310   1
  -4  -9  20 9815.16 998.293  -2
  -4   9 -16 9815.16 998.293   1
  -4   9 -17 3320.69 626.049   1
  -4   9 -18 2915.47 491.074   1
   4  10 -21 92.8695 424.618   1
   4  10 -20 19267.2 843.088   1
   4 -10  16 22204.7 1010.09  -2
   4  10 -20 22204.7 1010.09   1
   4 -10  15 1890.44 723.213  -2
   4  10 -19 1890.44 723.213   1
   4 -10  14 13244.9 1024.86  -2
   4  10 -18 13244.9 1024.86   1
   4 -10  13 5277.41 973.876  -2
   4  10 -17 5277.41 973.876   1
   4 -10  12 7585.49 1085.94  -2
   4  10 -16 7585.49 1085.94   1
   4 -10  11 34871.9 1577.06  -2
   4  10 -15 34871.9 1577.06   1
  -4 -10 -10 43968.4 1712.08  -2
  -4  10  14 43968.4 1712.08   1
  -4 -10  -9 48568.6 1828.93  -2
  -4  10  13 48568.6 1828.93   1
  -4 -10  -8 85372.3 2518.56  -2
  -4  10  12 85372.3 2518.56   1
  -4 -10  -7 24755.1 1723.10  -2
  -4  10  11 24755.1 1723.10   1
   4 -10   6 88775.8 2810.12  -2
   4  10 -10 88775.8 2810.12   1
  -4 -10  -5 13155.7 2114.08  -2
  -4  10   9 13155.7 2114.08   1
   4  10   4 60607.9 4398.54  -2
   4 -10  -8 60607.9 4398.54   1
   4  10   3 6240.76 1584.89  -2
   4 -10  -7 6240.76 1584.89   1
   4  10   2 73932.3 2943.42  -2
   4 -10  -6 73932.3 2943.42   1
   4  10   1 6603.00 1537.19  -2
   4 -10  -5 6603.00 1537.19   1
   4  10   0 51110.0 2585.12  -2
   4 -10  -4 51110.0 2585.12   1
   4  10  -1 43816.3 2432.65  -2
   4 -10  -3 43816.3 2432.65   1
   4  10  -2 33594.1 2201.18  -2
   4 -10  -2 33594.1 2201.18   1
   4  10  -3 78595.5 4666.89  -2
   4 -10  -1 78595.5 4666.89   1
   4  10  -4 27494.5 3023.44  -2
   4 -10   0 27494.5 3023.44   1
   4 -10  -5 15280.4 2051.00  -2
   4  10   1 15280.4 2051.00   1
   4 -10  -6 60785.3 4030.92  -2
   4  10   2 60785.3 4030.92   1
   4 -10  -7 12669.5 1907.84  -2
   4  10   3 12669.5 1907.84   1
   4 -10  -8 56169.5 3094.93  -2
   4  10   4 56169.5 3094.93   1
   4 -10  -9 15010.1 2984.86  -2
   4  10   5 15010.1 2984.86   1
  -4 -10  10 87218.6 3074.86  -2
  -4  10  -6 87218.6 3074.86   1
  -4  10  11 16162.8 1497.46  -2
  -4 -10  -7 16162.8 1497.46   1
  -4  10  12 132816. 2774.06  -2
  -4 -10  -8 132816. 2774.06   1
  -4 -10  13 24855.5 1621.65  -2
  -4  10  -9 24855.5 1621.65   1
  -4 -10  14 96512.0 2425.41  -2
  -4  10 -10 96512.0 2425.41   1
  -4 -10  15 25936.0 1628.66  -2
  -4  10 -11 25936.0 1628.66   1
  -4 -10  16 13783.9 1296.35  -2
  -4  10 -12 13783.9 1296.35   1
  -4  10 -13 4225.69 838.941   1
  -4 -10  17 6735.28 1080.32  -2
  -4  10 -13 6735.28 1080.32   1
  -4  10 -14 3490.81 704.636   1
  -4 -10  18 9150.46 1134.04  -2
  -4  10 -14 9150.46 1134.04   1
  -4  10 -15 1631.50 616.647   1
  -4 -10  19 1375.77 899.673  -2
  -4  10 -15 1375.77 899.673   1
  -4  10 -16 5752.14 682.446   1
  -4 -10  20 15756.3 973.094  -2
  -4  10 -16 15756.3 973.094   1
  -4  10 -17 2995.25 503.069   1
  -4  10 -18 10830.6 537.494   1
   4  11 -21 3448.49 710.938   1
   4  11 -20 471.494 466.232   1
   4  11 -19 9034.98 604.459   1
   4 -11  15 13203.3 854.288  -2
   4  11 -19 13203.3 854.288   1
   4 -11  14 36663.6 1427.69  -2
   4  11 -18 36663.6 1427.69   1
   4 -11  13 15244.4 1048.28  -2
   4  11 -17 15244.4 1048.28   1
   4 -11  12 79323.3 1836.85  -2
   4  11 -16 79323.3 1836.85   1
   4 -11  11 15798.1 1216.32  -2
   4  11 -15 15798.1 1216.32   1
   4 -11  10 126056. 2590.59  -2
   4  11 -14 126056. 2590.59   1
   4 -11   9 12433.3 1392.66  -2
   4  11 -13 12433.3 1392.66   1
  -4 -11  -8 87598.1 2361.71  -2
  -4  11  12 87598.1 2361.71   1
  -4 -11  -7 3694.45 1344.24  -2
  -4  11  11 3694.45 1344.24   1
  -4 -11  -6 56926.7 2599.56  -2
  -4  11  10 56926.7 2599.56   1
  -4 -11  -5 1750.88 1592.45  -2
  -4  11   9 1750.88 1592.45   1
  -4  11  -4 12538.0 2128.30  -2
  -4 -11   8 12538.0 2128.30   1
   4 -11   3 7565.00 1639.65  -2
   4  11  -7 7565.00 1639.65   1
   4  11   2 53473.5 2993.61  -2
   4 -11  -6 53473.5 2993.61   1
   4  11   1 16585.6 1815.17  -2
   4 -11  -5 16585.6 1815.17   1
   4  11   0 168061. 4367.83  -2
   4 -11  -4 168061. 4367.83   1
   4  11  -1 52863.2 2888.47  -2
   4 -11  -3 52863.2 2888.47   1
   4  11  -2 267235. 9704.37  -2
   4 -11  -2 267235. 9704.37   1
   4  11  -3 44595.9 2545.00  -2
   4 -11  -1 44595.9 2545.00   1
   4  11  -4 317961. 27505.7  -2
   4 -11   0 317961. 27505.7   1
   4 -11  -5 26150.9 3610.58  -2
   4  11   1 26150.9 3610.58   1
   4  11  -6 112094. 13599.8  -2
   4 -11   2 112094. 13599.8   1
   4 -11  -7 9317.75 3553.81  -2
   4  11   3 9317.75 3553.81   1
   4  11  -8 22648.0 6712.73  -2
   4 -11   4 22648.0 6712.73   1
  -4  11   9 1394.99 1279.55  -2
  -4 -11  -5 1394.99 1279.55   1
  -4  11  10 34327.6 1851.34  -2
  -4 -11  -6 34327.6 1851.34   1
   4 -11 -11 2558.59 1278.54  -2
   4  11   7 2558.59 1278.54   1
  -4  11  12 44052.1 1778.58  -2
  -4 -11  -8 44052.1 1778.58   1
  -4  11  13 10226.8 1211.00  -2
  -4 -11  -9 10226.8 1211.00   1
  -4 -11  14 95008.2 2201.54  -2
  -4  11 -10 95008.2 2201.54   1
  -4 -11  15 23528.1 1478.65  -2
  -4  11 -11 23528.1 1478.65   1
  -4 -11  16 121288. 2410.30  -2
  -4  11 -12 121288. 2410.30   1
  -4 -11  17 25084.0 1384.11  -2
  -4  11 -13 25084.0 1384.11   1
  -4  11 -14 70663.0 1480.53   1
  -4 -11  18 78133.0 1832.18  -2
  -4  11 -14 78133.0 1832.18   1
  -4  11 -15 10187.6 703.778   1
  -4 -11  19 14821.0 1922.34  -2
  -4  11 -15 14821.0 1922.34   1
  -4  11 -16 37958.4 1092.31   1
  -4  11 -17 1069.55 407.718   1
   4  12 -20 21982.3 793.024   1
   4  12 -19 3264.78 540.226   1
   4 -12  15 5064.11 659.697  -2
   4  12 -19 5064.11 659.697   1
   4 -12  14 21274.8 947.338  -2
   4  12 -18 21274.8 947.338   1
   4 -12 -17 598.964 573.758   1
   4 -12  13 2519.95 820.123  -2
   4  12 -17 2519.95 820.123   1
   4 -12  12 8884.95 1025.19  -2
   4  12 -16 8884.95 1025.19   1
   4 -12  11 10199.9 1137.57  -2
   4  12 -15 10199.9 1137.57   1
   4 -12  10 49977.3 1690.75  -2
   4  12 -14 49977.3 1690.75   1
   4 -12   9 19568.7 1458.87  -2
   4  12 -13 19568.7 1458.87   1
   4 -12   8 115870. 2558.24  -2
   4  12 -12 115870. 2558.24   1
   4 -12   7 26193.8 1692.06  -2
   4  12 -11 26193.8 1692.06   1
  -4 -12  -6 83373.0 2423.17  -2
  -4  12  10 83373.0 2423.17   1
  -4 -12  -5 78097.5 2287.03  -2
  -4  12   9 78097.5 2287.03   1
  -4 -12  -4 84352.3 2403.26  -2
  -4  12   8 84352.3 2403.26   1
  -4  12  -3 48740.4 2149.08  -2
  -4 -12   7 48740.4 2149.08   1
  -4  12  -2 84028.0 9408.87  -2
  -4 -12   6 84028.0 9408.87   1
  -4  12  -1 24878.9 2770.09  -2
  -4 -12   5 24878.9 2770.09   1
   4  12   0 51217.3 2700.84  -2
   4 -12  -4 51217.3 2700.84   1
   4  12  -1 28551.3 2324.33  -2
   4 -12  -3 28551.3 2324.33   1
   4  12  -2 19496.6 2023.71  -2
   4 -12  -2 19496.6 2023.71   1
   4  12  -3 20130.4 2067.84  -2
   4 -12  -1 20130.4 2067.84   1
   4 -12  -4 28854.4 4071.64  -2
   4  12   0 28854.4 4071.64   1
   4  12  -5 17212.8 2190.65  -2
   4 -12   1 17212.8 2190.65   1
   4 -12  -6 62673.3 3415.81  -2
   4  12   2 62673.3 3415.81   1
  -4  12   7 45721.3 2351.64  -2
  -4 -12  -3 45721.3 2351.64   1
  -4  12   8 89448.8 3299.26  -2
  -4 -12  -4 89448.8 3299.26   1
  -4  12   9 75673.1 2962.66  -2
  -4 -12  -5 75673.1 2962.66   1
  -4  12  10 108544. 2860.96  -2
  -4 -12  -6 108544. 2860.96   1
  -4  12  11 26212.6 1628.28  -2
  -4 -12  -7 26212.6 1628.28   1
  -4  12  12 167580. 3410.48  -2
  -4 -12  -8 167580. 3410.48   1
  -4  12  13 36242.3 1603.88  -2
  -4 -12  -9 36242.3 1603.88   1
  -4 -12  14 70685.9 1908.03  -2
  -4  12 -10 70685.9 1908.03   1
  -4 -12  15 20066.2 1408.20  -2
  -4  12 -11 20066.2 1408.20   1
  -4 -12  16 18658.2 1324.71  -2
  -4  12 -12 18658.2 1324.71   1
  -4 -12  17 1539.84 926.193  -2
  -4  12 -13 1539.84 926.193   1
  -4  12 -14 991.864 634.947   1
  -4 -12  18 10020.6 2016.34  -2
  -4  12 -14 10020.6 2016.34   1
  -4  12 -15 853.124 505.229   1
  -4 -12  19 2564.00 736.831  -2
  -4  12 -15 2564.00 736.831   1
  -4  12 -16 11449.8 835.008   1
  -4  12 -17 4866.70 577.066   1
   4  13 -20 1971.80 429.377   1
   4  13 -19 785.767 492.502   1
   4  13 -18 10344.2 1252.76   1
   4 -13  14 26031.8 1088.54  -2
   4  13 -18 26031.8 1088.54   1
   4 -13 -17 3980.95 627.832   1
   4 -13  13 15028.2 956.664  -2
   4  13 -17 15028.2 956.664   1
   4 -13 -16 46268.9 1335.20   1
   4 -13  12 65334.9 1599.23  -2
   4  13 -16 65334.9 1599.23   1
   4 -13  11 23070.4 1276.61  -2
   4  13 -15 23070.4 1276.61   1
   4 -13  10 49073.5 1646.05  -2
   4  13 -14 49073.5 1646.05   1
   4 -13   9 28624.6 1493.46  -2
   4  13 -13 28624.6 1493.46   1
   4 -13   8 28011.5 1540.03  -2
   4  13 -12 28011.5 1540.03   1
   4 -13   7 69903.2 2200.12  -2
   4  13 -11 69903.2 2200.12   1
   4 -13   6 13393.5 1293.78  -2
   4  13 -10 13393.5 1293.78   1
   4 -13   5 18693.1 1501.10  -2
   4  13  -9 18693.1 1501.10   1
   4 -13   4 23361.4 1624.98  -2
   4  13  -8 23361.4 1624.98   1
   4 -13   3 30774.8 1793.76  -2
   4  13  -7 30774.8 1793.76   1
  -4  13  -2 44417.2 1986.56  -2
  -4 -13   6 44417.2 1986.56   1
  -4  13  -1 50449.4 1842.39  -2
  -4 -13   5 50449.4 1842.39   1
  -4  13   0 135917. 2935.61  -2
  -4 -13   4 135917. 2935.61   1
  -4  13   1 37265.5 1891.51  -2
  -4 -13   3 37265.5 1891.51   1
   4 -13  -2 192715. 3216.16  -2
   4  13  -2 192715. 3216.16   1
   4 -13  -3 48722.9 2288.21  -2
   4  13  -1 48722.9 2288.21   1
   4 -13  -4 128097. 3252.61  -2
   4  13   0 128097. 3252.61   1
   4  13  -5 119327. 2944.74  -2
   4 -13   1 119327. 2944.74   1
   4  13  -6 59670.1 2319.54  -2
   4 -13   2 59670.1 2319.54   1
   4 -13  -7 65972.0 2514.52  -2
   4  13   3 65972.0 2514.52   1
   4 -13  -8 28552.7 1958.92  -2
   4  13   4 28552.7 1958.92   1
  -4  13   9 22195.9 1613.11  -2
  -4 -13  -5 22195.9 1613.11   1
  -4  13  10 5765.35 1244.91  -2
  -4 -13  -6 5765.35 1244.91   1
  -4  13  11 35678.0 1843.44  -2
  -4 -13  -7 35678.0 1843.44   1
  -4  13  12 32874.9 1566.11  -2
  -4 -13  -8 32874.9 1566.11   1
  -4  13  13 17523.1 1308.89  -2
  -4 -13  -9 17523.1 1308.89   1
  -4  13  14 50251.8 1639.02  -2
  -4 -13 -10 50251.8 1639.02   1
  -4 -13  15 23439.7 1252.14  -2
  -4  13 -11 23439.7 1252.14   1
  -4 -13  16 66221.4 1832.21  -2
  -4  13 -12 66221.4 1832.21   1
  -4  13 -13 21888.6 1093.94   1
  -4 -13  17 25892.9 1289.21  -2
  -4  13 -13 25892.9 1289.21   1
  -4  13 -14 31922.1 1003.27   1
  -4 -13  18 39394.6 1305.56  -2
  -4  13 -14 39394.6 1305.56   1
  -4  13 -15 19571.7 1859.00   1
  -4 -13  19 22088.0 1007.57  -2
  -4  13 -15 22088.0 1007.57   1
  -4  13 -16 23448.0 1405.82   1
   4  14 -19 10035.6 593.935   1
   4 -14  14 1237.93 674.812  -2
   4  14 -18 1237.93 674.812   1
   4 -14 -17 5398.49 565.379   1
   4 -14  13 10302.2 822.111  -2
   4  14 -17 10302.2 822.111   1
   4 -14 -16 8839.97 768.569   1
   4 -14  12 10790.6 925.108  -2
   4  14 -16 10790.6 925.108   1
   4 -14  11 13961.2 1068.15  -2
   4  14 -15 13961.2 1068.15   1
   4 -14  10 29717.2 1395.26  -2
   4  14 -14 29717.2 1395.26   1
   4 -14   9 14519.1 1213.00  -2
   4  14 -13 14519.1 1213.00   1
   4 -14   8 45506.2 1713.77  -2
   4  14 -12 45506.2 1713.77   1
   4 -14   7 16415.9 1292.01  -2
   4  14 -11 16415.9 1292.01   1
   4 -14   6 39399.5 1700.59  -2
   4  14 -10 39399.5 1700.59   1
   4 -14   5 21643.7 1444.86  -2
   4  14  -9 21643.7 1444.86   1
   4 -14   4 34035.4 4439.58  -2
   4  14  -8 34035.4 4439.58   1
   4 -14   3 36528.9 1725.08  -2
   4  14  -7 36528.9 1725.08   1
   4 -14   2 17189.3 1536.56  -2
   4  14  -6 17189.3 1536.56   1
  -4  14  -1 23792.6 1678.39  -2
  -4 -14   5 23792.6 1678.39   1
  -4  14   0 11358.2 1121.21  -2
  -4 -14   4 11358.2 1121.21   1
  -4  14   1 28951.7 1631.15  -2
  -4 -14   3 28951.7 1631.15   1
   4 -14  -2 8529.30 1295.81  -2
   4  14  -2 8529.30 1295.81   1
   4 -14  -3 21126.2 1590.86  -2
   4  14  -1 21126.2 1590.86   1
   4 -14  -4 18328.9 1603.65  -2
   4  14   0 18328.9 1603.65   1
   4 -14  -5 17706.9 1621.76  -2
   4  14   1 17706.9 1621.76   1
   4 -14  -6 22370.0 1741.70  -2
   4  14   2 22370.0 1741.70   1
   4 -14  -7 17100.9 1594.03  -2
   4  14   3 17100.9 1594.03   1
  -4  14   8 42415.9 1963.23  -2
  -4 -14  -4 42415.9 1963.23   1
   4 -14  -9 28561.3 1640.10  -2
   4  14   5 28561.3 1640.10   1
   4  14   6 27853.6 1180.20   1
  -4  14  10 43705.2 1887.52  -2
  -4 -14  -6 43705.2 1887.52   1
  -4  14  11 31724.7 1639.94  -2
  -4 -14  -7 31724.7 1639.94   1
  -4  14  12 29326.2 1491.18  -2
  -4 -14  -8 29326.2 1491.18   1
  -4  14  13 31040.5 1459.78  -2
  -4 -14  -9 31040.5 1459.78   1
  -4  14  14 15513.3 1144.51  -2
  -4 -14 -10 15513.3 1144.51   1
  -4 -14  15 23882.6 1346.38  -2
  -4  14 -11 23882.6 1346.38   1
  -4 -14  16 7388.16 1009.41  -2
  -4  14 -12 7388.16 1009.41   1
  -4  14 -13 9676.15 792.559   1
  -4 -14  17 13141.9 1031.90  -2
  -4  14 -13 13141.9 1031.90   1
  -4 -14  18 294.314 551.758  -2
  -4  14 -14 294.314 551.758   1
  -4  14 -15 1121.70 523.083   1
  -4 -14  19 5937.68 690.351  -2
  -4  14 -15 5937.68 690.351   1
   4  15 -19 2981.61 414.666   1
   4  15 -18 7187.87 572.068   1
   4 -15 -17-21.1088 375.111   1
   4 -15  13 1384.99 696.900  -2
   4  15 -17 1384.99 696.900   1
   4 -15 -16 2791.16 581.801   1
   4 -15  12 2977.49 721.791  -2
   4  15 -16 2977.49 721.791   1
   4 -15 -15 2128.86 656.091   1
   4 -15  11 2665.09 815.176  -2
   4  15 -15 2665.09 815.176   1
   4 -15  10 4560.49 912.384  -2
   4  15 -14 4560.49 912.384   1
   4 -15   9 5118.59 967.793  -2
   4  15 -13 5118.59 967.793   1
   4 -15   8 13793.0 1089.15  -2
   4  15 -12 13793.0 1089.15   1
   4 -15   7 25013.5 1408.67  -2
   4  15 -11 25013.5 1408.67   1
   4 -15   6 32919.5 1554.29  -2
   4  15 -10 32919.5 1554.29   1
   4 -15   5 46477.4 5702.41  -2
   4  15  -9 46477.4 5702.41   1
   4 -15   4 29268.4 3320.89  -2
   4  15  -8 29268.4 3320.89   1
   4 -15   3 13564.2 1293.43  -2
   4  15  -7 13564.2 1293.43   1
   4 -15   2 43933.7 7237.57  -2
   4  15  -6 43933.7 7237.57   1
  -4  15  -1 5902.11 1008.12  -2
  -4 -15   5 5902.11 1008.12   1
  -4  15   0 9052.68 1067.86  -2
  -4 -15   4 9052.68 1067.86   1
  -4  15   1 11118.6 1189.20  -2
  -4 -15   3 11118.6 1189.20   1
  -4  15   2 17392.3 1384.01  -2
  -4 -15   2 17392.3 1384.01   1
   4 -15  -3 8611.10 1241.69  -2
   4  15  -1 8611.10 1241.69   1
   4 -15  -4 4517.90 1089.90  -2
   4  15   0 4517.90 1089.90   1
   4 -15  -5 12070.7 1328.15  -2
   4  15   1 12070.7 1328.15   1
  -4  15   6 21481.1 1645.78  -2
  -4 -15  -2 21481.1 1645.78   1
   4 -15  -7 19632.5 1669.79  -2
   4  15   3 19632.5 1669.79   1
   4 -15  -8 17459.6 1763.74  -2
   4  15   4 17459.6 1763.74   1
   4 -15  -9 28023.6 1552.06  -2
   4  15   5 28023.6 1552.06   1
   4 -15 -10 46493.3 1779.37  -2
   4  15   6 46493.3 1779.37   1
  -4  15  11 11498.6 1244.31  -2
  -4 -15  -7 11498.6 1244.31   1
  -4  15  12 27467.4 1406.71  -2
  -4 -15  -8 27467.4 1406.71   1
  -4  15  13 3329.10 960.068  -2
  -4 -15  -9 3329.10 960.068   1
  -4  15  14 11356.6 1034.15  -2
  -4 -15 -10 11356.6 1034.15   1
  -4 -15  15 2429.81 820.561  -2
  -4  15 -11 2429.81 820.561   1
  -4 -15  16 1502.04 815.220  -2
  -4  15 -12 1502.04 815.220   1
  -4  15 -13 3292.25 566.510   1
  -4 -15  17 2795.05 792.773  -2
  -4  15 -13 2795.05 792.773   1
  -4  15 -14 3419.71 530.462   1
  -4 -15  18 6357.90 719.844  -2
  -4  15 -14 6357.90 719.844   1
  -4  15 -15 7307.11 468.325   1
  -4 -15  19 9640.97 625.823  -2
  -4  15 -15 9640.97 625.823   1
   4  16 -18 21233.5 676.249   1
   4 -16 -17 579.000 350.788   1
   4 -16  13 1188.09 594.286  -2
   4  16 -17 1188.09 594.286   1
   4 -16 -16 35982.6 957.197   1
   4 -16  12 39973.0 1022.54  -2
   4  16 -16 39973.0 1022.54   1
   4  16  11 497.290 699.873  -2
   4 -16 -15 497.290 699.873   1
   4  16  10 36000.5 1269.98  -2
   4 -16 -14 36000.5 1269.98   1
   4 -16   9 1691.51 829.062  -2
   4  16 -13 1691.51 829.062   1
   4 -16   8 28761.2 1540.78  -2
   4  16 -12 28761.2 1540.78   1
   4 -16   7 2210.30 915.989  -2
   4  16 -11 2210.30 915.989   1
   4  16 -10 8098.14 839.753   1
   4 -16   6 9910.38 1120.64  -2
   4  16 -10 9910.38 1120.64   1
   4 -16   5 7463.21 1093.68  -2
   4  16  -9 7463.21 1093.68   1
   4 -16   4 3051.22 1516.36  -2
   4  16  -8 3051.22 1516.36   1
   4 -16   3 5181.50 947.924  -2
   4  16  -7 5181.50 947.924   1
   4 -16   2 12546.5 1102.40  -2
   4  16  -6 12546.5 1102.40   1
   4 -16   1 7778.27 1085.56  -2
   4  16  -5 7778.27 1085.56   1
  -4  16   0 60240.5 1846.72  -2
  -4 -16   4 60240.5 1846.72   1
  -4  16   1 4721.34 1102.04  -2
  -4 -16   3 4721.34 1102.04   1
  -4  16   2 55545.4 1991.48  -2
  -4 -16   2 55545.4 1991.48   1
   4 -16  -3 6975.92 1204.00  -2
   4  16  -1 6975.92 1204.00   1
   4 -16  -4 57364.6 2108.73  -2
   4  16   0 57364.6 2108.73   1
   4 -16  -5 17484.3 1431.19  -2
   4  16   1 17484.3 1431.19   1
   4 -16  -6 13140.3 1333.13  -2
   4  16   2 13140.3 1333.13   1
   4 -16  -7 5998.46 1175.40  -2
   4  16   3 5998.46 1175.40   1
  -4  16   8 8259.07 1234.33  -2
  -4 -16  -4 8259.07 1234.33   1
   4 -16  -9 3596.76 1062.19  -2
   4  16   5 3596.76 1062.19   1
   4 -16 -10 4824.20 1075.75  -2
   4  16   6 4824.20 1075.75   1
   4  16   7 74.4644 561.931   1
  -4  16  11 1567.54 978.337  -2
  -4 -16  -7 1567.54 978.337   1
  -4  16  12 18797.3 1240.25  -2
  -4 -16  -8 18797.3 1240.25   1
  -4  16  13 1781.22 879.927  -2
  -4 -16  -9 1781.22 879.927   1
  -4  16  14 27659.3 1182.88  -2
  -4 -16 -10 27659.3 1182.88   1
  -4 -16 -11 3.31590 464.425   1
  -4 -16  15 479.703 786.626  -2
  -4  16 -11 479.703 786.626   1
  -4 -16  16 25916.4 2077.07  -2
  -4  16 -12 25916.4 2077.07   1
  -4 -16  17 2016.64 652.838  -2
  -4  16 -13 2016.64 652.838   1
  -4  16 -14 5788.50 504.377   1
  -4 -16  18 13844.3 669.275  -2
  -4  16 -14 13844.3 669.275   1
   4  17 -17 12616.1 562.925   1
   4 -17 -16 406.764 352.437   1
   4 -17  12 1740.46 599.085  -2
   4  17 -16 1740.46 599.085   1
   4 -17 -15 13351.2 727.077   1
   4 -17  11 23242.5 849.406  -2
   4  17 -15 23242.5 849.406   1
   4  17  10 2924.77 720.034  -2
   4 -17 -14 2924.77 720.034   1
   4  17   9 8247.14 875.109  -2
   4 -17 -13 8247.14 875.109   1
   4  17   8 4839.65 875.826  -2
   4 -17 -12 4839.65 875.826   1
   4 -17   7 1219.42 841.791  -2
   4  17 -11 1219.42 841.791   1
   4 -17   6 20643.1 1251.83  -2
   4  17 -10 20643.1 1251.83   1
   4 -17   5 3708.57 887.920  -2
   4  17  -9 3708.57 887.920   1
   4 -17   4 26138.9 1305.25  -2
   4  17  -8 26138.9 1305.25   1
   4 -17   3 7353.07 966.310  -2
   4  17  -7 7353.07 966.310   1
   4 -17   2 28637.6 1402.10  -2
   4  17  -6 28637.6 1402.10   1
   4 -17   1 21156.2 1291.74  -2
   4  17  -5 21156.2 1291.74   1
  -4  17   0 8597.68 1101.08  -2
  -4 -17   4 8597.68 1101.08   1
  -4  17   1 19133.5 1313.53  -2
  -4 -17   3 19133.5 1313.53   1
  -4  17   2 1663.08 989.828  -2
  -4 -17   2 1663.08 989.828   1
  -4  17   3 14753.0 1325.61  -2
  -4 -17   1 14753.0 1325.61   1
   4 -17  -4 5668.24 1125.88  -2
   4  17   0 5668.24 1125.88   1
   4 -17  -5 33923.7 1682.21  -2
   4  17   1 33923.7 1682.21   1
   4 -17  -6 18947.2 1418.08  -2
   4  17   2 18947.2 1418.08   1
   4 -17  -7 13168.5 1261.17  -2
   4  17   3 13168.5 1261.17   1
   4 -17  -8 21947.3 1396.94  -2
   4  17   4 21947.3 1396.94   1
   4 -17  -9 6214.28 1082.12  -2
   4  17   5 6214.28 1082.12   1
   4 -17 -10 24309.0 1337.07  -2
   4  17   6 24309.0 1337.07   1
   4 -17 -11 635.745 859.158  -2
   4  17   7 635.745 859.158   1
  -4  17  12 8939.00 995.320  -2
  -4 -17  -8 8939.00 995.320   1
  -4  17  13 6150.21 880.812  -2
  -4 -17  -9 6150.21 880.812   1
  -4 -17  14 2745.32 757.866  -2
  -4  17 -10 2745.32 757.866   1
  -4 -17 -11 20904.8 746.501   1
  -4 -17  15 25815.4 1856.75  -2
  -4  17 -11 25815.4 1856.75   1
  -4 -17  16 2411.17 723.702  -2
  -4  17 -12 2411.17 723.702   1
  -4  17 -13 17172.4 671.186   1
  -4 -17  17 22584.9 2711.61  -2
  -4  17 -13 22584.9 2711.61   1
   4 -18 -16 14969.1 528.551   1
   4  18 -15 1334.77 343.007   1
   4  18  11 9355.80 687.214  -2
   4 -18 -15 9355.80 687.214   1
   4  18  10 6350.14 667.342  -2
   4 -18 -14 6350.14 667.342   1
   4  18   9 13466.4 830.686  -2
   4 -18 -13 13466.4 830.686   1
   4  18 -12 9622.05 668.004   1
   4  18   8 12546.5 1128.17  -2
   4 -18 -12 12546.5 1128.17   1
   4  18   7 37131.7 1340.58  -2
   4 -18 -11 37131.7 1340.58   1
   4  18   6 13415.8 1074.83  -2
   4 -18 -10 13415.8 1074.83   1
   4  18   5 84342.0 2561.30  -2
   4 -18  -9 84342.0 2561.30   1
   4 -18   4 5833.12 901.811  -2
   4  18  -8 5833.12 901.811   1
   4 -18   3 87650.1 2014.46  -2
   4  18  -7 87650.1 2014.46   1
   4 -18   2 11573.3 1104.30  -2
   4  18  -6 11573.3 1104.30   1
   4 -18   1 60789.2 1872.61  -2
   4  18  -5 60789.2 1872.61   1
  -4  18   0 15708.5 1087.47  -2
  -4 -18   4 15708.5 1087.47   1
  -4  18   1 25748.6 1513.72  -2
  -4 -18   3 25748.6 1513.72   1
  -4  18   2 14046.2 1223.71  -2
  -4 -18   2 14046.2 1223.71   1
  -4  18   3 12645.9 1223.66  -2
  -4 -18   1 12645.9 1223.66   1
  -4  18   4 13851.0 1275.42  -2
  -4 -18   0 13851.0 1275.42   1
   4 -18  -5 33189.0 1555.69  -2
   4  18   1 33189.0 1555.69   1
   4 -18  -6 16271.0 1278.95  -2
   4  18   2 16271.0 1278.95   1
   4 -18  -7 74536.1 2041.46  -2
   4  18   3 74536.1 2041.46   1
   4 -18  -8 7257.62 1059.12  -2
   4  18   4 7257.62 1059.12   1
   4 -18  -9 93485.8 2085.94  -2
   4  18   5 93485.8 2085.94   1
   4 -18 -10 6586.76 988.149  -2
   4  18   6 6586.76 988.149   1
   4  18   7 53277.5 1213.93   1
  -4  18  11 61851.9 1727.99  -2
  -4 -18  -7 61851.9 1727.99   1
  -4  18  12 11602.6 974.670  -2
  -4 -18  -8 11602.6 974.670   1
  -4  18  13 23466.9 1054.56  -2
  -4 -18  -9 23466.9 1054.56   1
  -4 -18  14 5133.10 700.254  -2
  -4  18 -10 5133.10 700.254   1
  -4 -18 -11 18538.7 633.168   1
  -4 -18  15 18756.4 904.865  -2
  -4  18 -11 18756.4 904.865   1
  -4 -18  16 9724.08 661.770  -2
  -4  18 -12 9724.08 661.770   1
   4 -19 -15 28506.2 675.413   1
   4  19 -14 125.223 304.196   1
   4  19  10 942.376 623.799  -2
   4 -19 -14 942.376 623.799   1
   4  19   9 30499.4 920.427  -2
   4 -19 -13 30499.4 920.427   1
   4  19   8 1729.16 716.508  -2
   4 -19 -12 1729.16 716.508   1
   4  19   7 18874.3 1017.11  -2
   4 -19 -11 18874.3 1017.11   1
   4  19   6 631.816 788.473  -2
   4 -19 -10 631.816 788.473   1
   4  19   5 24224.9 1632.66  -2
   4 -19  -9 24224.9 1632.66   1
   4  19   4 206.279 594.236  -2
   4 -19  -8 206.279 594.236   1
   4  19   3 32188.6 2016.44  -2
   4 -19  -7 32188.6 2016.44   1
   4  19   2 3673.43 961.348  -2
   4 -19  -6 3673.43 961.348   1
   4  19   1 62850.1 5212.70  -2
   4 -19  -5 62850.1 5212.70   1
   4  19   0 7103.11 912.617  -2
   4 -19  -4 7103.11 912.617   1
   4  19  -1 68294.0 3400.40  -2
   4 -19  -3 68294.0 3400.40   1
  -4  19   2 4604.96 972.518  -2
  -4 -19   2 4604.96 972.518   1
  -4  19   3 74399.1 2012.51  -2
  -4 -19   1 74399.1 2012.51   1
  -4  19   4 9684.66 1110.87  -2
  -4 -19   0 9684.66 1110.87   1
  -4  19   5 91082.0 2254.00  -2
  -4 -19  -1 91082.0 2254.00   1
  -4  19   6 4598.34 982.576  -2
  -4 -19  -2 4598.34 982.576   1
  -4  19   7 62614.8 1784.26  -2
  -4 -19  -3 62614.8 1784.26   1
  -4  19   8 1198.02 842.271  -2
  -4 -19  -4 1198.02 842.271   1
  -4  19   9 28985.3 1272.06  -2
  -4 -19  -5 28985.3 1272.06   1
  -4  19  10 649.128 641.225  -2
  -4 -19  -6 649.128 641.225   1
  -4  19  11 11192.3 910.003  -2
  -4 -19  -7 11192.3 910.003   1
  -4  19  12 4024.40 760.614  -2
  -4 -19  -8 4024.40 760.614   1
  -4 -19  13 23341.1 1005.57  -2
  -4  19  -9 23341.1 1005.57   1
  -4 -19 -10 2339.35 460.900   1
  -4 -19  14 2572.68 810.978  -2
  -4  19 -10 2572.68 810.978   1
  -4 -19  15 29454.2 1235.16  -2
  -4  19 -11 29454.2 1235.16   1
   4  20 -13 3574.00 345.223   1
   4  20   9 15815.1 775.078  -2
   4 -20 -13 15815.1 775.078   1
   4  20   8 6494.65 627.267  -2
   4 -20 -12 6494.65 627.267   1
   4  20   7 37367.8 1175.10  -2
   4 -20 -11 37367.8 1175.10   1
   4  20   6 6087.44 784.950  -2
   4 -20 -10 6087.44 784.950   1
   4  20   5 99115.1 1808.80  -2
   4 -20  -9 99115.1 1808.80   1
   4  20   4 10883.6 970.651  -2
   4 -20  -8 10883.6 970.651   1
   4  20   3 87813.6 2277.84  -2
   4 -20  -7 87813.6 2277.84   1
   4  20   2 13733.7 1105.77  -2
   4 -20  -6 13733.7 1105.77   1
   4  20   1 53647.0 1716.82  -2
   4 -20  -5 53647.0 1716.82   1
   4  20   0 6436.15 1136.64  -2
   4 -20  -4 6436.15 1136.64   1
   4  20  -1 21919.9 1432.91  -2
   4 -20  -3 21919.9 1432.91   1
  -4  20   2 886.276 782.374  -2
  -4 -20   2 886.276 782.374   1
  -4  20   3 8956.46 978.062  -2
  -4 -20   1 8956.46 978.062   1
  -4  20   4 3988.25 1048.51  -2
  -4 -20   0 3988.25 1048.51   1
  -4  20   5 29694.6 1317.08  -2
  -4 -20  -1 29694.6 1317.08   1
  -4  20   6 7345.10 961.927  -2
  -4 -20  -2 7345.10 961.927   1
  -4  20   7 73987.3 1745.16  -2
  -4 -20  -3 73987.3 1745.16   1
  -4  20   8 7302.64 958.724  -2
  -4 -20  -4 7302.64 958.724   1
  -4  20   9 113642. 2030.14  -2
  -4 -20  -5 113642. 2030.14   1
  -4  20  10 9832.29 850.639  -2
  -4 -20  -6 9832.29 850.639   1
   4  20   7 62709.9 1107.09   1
  -4  20  11 62725.1 1623.45  -2
  -4 -20  -7 62725.1 1623.45   1
  -4 -20  12 5570.47 651.272  -2
  -4  20  -8 5570.47 651.272   1
  -4 -20  13 27834.0 865.969  -2
  -4  20  -9 27834.0 865.969   1
  -4  20 -10 1470.15 349.972   1
   4  21   8 6546.87 534.688  -2
   4 -21 -12 6546.87 534.688   1
   4  21   7 5645.29 573.302  -2
   4 -21 -11 5645.29 573.302   1
   4  21   6 12371.0 752.741  -2
   4 -21 -10 12371.0 752.741   1
   4  21   5 349.268 641.504  -2
   4 -21  -9 349.268 641.504   1
   4  21   4 31552.9 1123.70  -2
   4 -21  -8 31552.9 1123.70   1
   4  21   3 16265.3 980.782  -2
   4 -21  -7 16265.3 980.782   1
   4  21   2 12447.9 973.338  -2
   4 -21  -6 12447.9 973.338   1
   4  21   1 29958.2 2100.54  -2
   4 -21  -5 29958.2 2100.54   1
   4  21   0 9582.38 2203.25  -2
   4 -21  -4 9582.38 2203.25   1
  -4  21   1 39343.0 1167.06  -2
  -4 -21   3 39343.0 1167.06   1
  -4  21   2 8977.31 837.862  -2
  -4 -21   2 8977.31 837.862   1
  -4  21   3 52358.9 1433.09  -2
  -4 -21   1 52358.9 1433.09   1
  -4  21   4 15389.9 979.208  -2
  -4 -21   0 15389.9 979.208   1
  -4  21   5 35420.6 1254.16  -2
  -4 -21  -1 35420.6 1254.16   1
  -4  21   6 18080.1 1003.08  -2
  -4 -21  -2 18080.1 1003.08   1
  -4  21   7 22055.6 1036.97  -2
  -4 -21  -3 22055.6 1036.97   1
  -4  21   8 43092.3 1219.45  -2
  -4 -21  -4 43092.3 1219.45   1
  -4  21   9 1182.61 645.374  -2
  -4 -21  -5 1182.61 645.374   1
  -4  21  10 18731.8 837.226  -2
  -4 -21  -6 18731.8 837.226   1
   4  21   7 330.432 364.077   1
  -4  21  11 3302.78 582.638  -2
  -4 -21  -7 3302.78 582.638   1
  -4  21  12 2806.20 509.669  -2
  -4 -21  -8 2806.20 509.669   1
   4  22   6 1901.15 457.002  -2
   4 -22 -10 1901.15 457.002   1
   4  22   5 23090.0 781.906  -2
   4 -22  -9 23090.0 781.906   1
   4  22   4 7513.81 680.914  -2
   4 -22  -8 7513.81 680.914   1
   4  22   3 13800.0 816.301  -2
   4 -22  -7 13800.0 816.301   1
   4  22   2 20128.6 1538.69  -2
   4 -22  -6 20128.6 1538.69   1
   4  22   1 6131.99 1566.83  -2
   4 -22  -5 6131.99 1566.83   1
   4  22   0 18736.3 1062.88  -2
   4 -22  -4 18736.3 1062.88   1
   4 -22  -1 615.820 636.551  -2
   4  22  -3 615.820 636.551   1
  -4  22   2 12186.6 743.825  -2
  -4 -22   2 12186.6 743.825   1
   4 -22  -3 1419.06 608.268  -2
   4  22  -1 1419.06 608.268   1
  -4  22   4 8530.94 1520.02  -2
  -4 -22   0 8530.94 1520.02   1
  -4  22   5 9572.30 753.995  -2
  -4 -22  -1 9572.30 753.995   1
  -4  22   6 9086.43 728.561  -2
  -4 -22  -2 9086.43 728.561   1
  -4  22   7 19282.8 827.000  -2
  -4 -22  -3 19282.8 827.000   1
  -4  22   8 3455.70 622.235  -2
  -4 -22  -4 3455.70 622.235   1
  -4  22   9 27126.8 799.593  -2
  -4 -22  -5 27126.8 799.593   1
  -4 -22  10 3319.12 598.452  -2
  -4  22  -6 3319.12 598.452   1
   4  23   3 15597.5 1074.22  -2
   4 -23  -7 15597.5 1074.22   1
   4  23   2 11935.5 891.138  -2
   4 -23  -6 11935.5 891.138   1
   4 -23   1 10648.9 672.817  -2
   4  23  -5 10648.9 672.817   1
   4 -23   0 12502.6 725.759  -2
   4  23  -4 12502.6 725.759   1
   4 -23  -1 7934.24 661.326  -2
   4  23  -3 7934.24 661.326   1
   4 -23  -2 2357.90 586.803  -2
   4  23  -2 2357.90 586.803   1
  -4  23   3 7729.14 569.788  -2
  -4 -23   1 7729.14 569.788   1
  -4  23   4 13014.7 654.283  -2
  -4 -23   0 13014.7 654.283   1
  -4  23   5 4596.03 547.146  -2
  -4 -23  -1 4596.03 547.146   1
   4 -23  -6 10781.2 614.381  -2
   4  23   2 10781.2 614.381   1
  -4  23   7 11479.5 586.219  -2
  -4 -23  -3 11479.5 586.219   1
   5   0 -23 20.8719 406.873   1
   5   0 -22 44471.2 1176.57   1
   5   0 -21-70.4420 564.880   1
   5   0 -20 104195. 3134.43   1
   5   0 -19 287.689 836.936   1
   5   0 -18 67987.5 2140.47   1
   5   0  13 68458.5 1863.92  -2
   5   0 -18 68458.5 1863.92   1
   5   0  12 6426.71 1387.48  -2
   5   0 -17 6426.71 1387.48   1
   5   0  11 11386.0 2267.55  -2
   5   0 -16 11386.0 2267.55   1
   5   0  10 21107.4 1480.75  -2
   5   0 -15 21107.4 1480.75   1
   5   0 -14 2867.47 2197.70   1
   5   0   9 1434.59 1181.98  -2
   5   0 -14 1434.59 1181.98   1
   5   0 -13 58.3246 1715.84   1
  -5   0  -8 49127.6 1815.11  -2
  -5   0  13 49127.6 1815.11   1
   5   0 -12 12548.5 1887.50   1
  -5   0  -7 15323.6 1747.90  -2
  -5   0  12 15323.6 1747.90   1
   5   0   6 93260.9 5683.63  -2
   5   0 -11 93260.9 5683.63   1
   5   0   5 103431. 3198.00  -2
   5   0 -10 103431. 3198.00   1
   5   0   4 145116. 7162.62  -2
   5   0  -9 145116. 7162.62   1
   5   0   3 428712. 21028.1  -2
   5   0  -8 428712. 21028.1   1
   5   0   2 23059.4 1986.26  -2
   5   0  -7 23059.4 1986.26   1
   5   0   1 299041. 30929.1  -2
   5   0  -6 299041. 30929.1   1
   5   0  -5 242.150 544.352   1
   5   0   0 553.934 961.961  -2
   5   0  -5 553.934 961.961   1
   5   0  -1 166534. 3115.07  -2
   5   0  -4 166534. 3115.07   1
   5   0  -2 28318.2 1545.86  -2
   5   0  -3 28318.2 1545.86   1
   5   0  -3 60098.7 1786.95  -2
   5   0  -2 60098.7 1786.95   1
  -5   0   4 78278.6 1932.19  -2
  -5   0   1 78278.6 1932.19   1
   5   0  -5 4742.89 1143.86  -2
   5   0   0 4742.89 1143.86   1
   5   0  -6 150937. 3763.96  -2
   5   0   1 150937. 3763.96   1
   5   0  -7 46756.5 2292.68  -2
   5   0   2 46756.5 2292.68   1
   5   0  -8 216119. 4655.95  -2
   5   0   3 216119. 4655.95   1
   5   0  -9 274545. 5135.66  -2
   5   0   4 274545. 5135.66   1
   5   0 -10 56611.6 2747.70  -2
   5   0   5 56611.6 2747.70   1
   5   0 -11 180276. 4329.27  -2
   5   0   6 180276. 4329.27   1
   5   0 -12 8836.47 1772.20  -2
   5   0   7 8836.47 1772.20   1
  -5   0  13 96350.9 3146.98  -2
  -5   0  -8 96350.9 3146.98   1
  -5   0  -9 348.447 773.676   1
   5   0 -14 2952.78 2563.69  -2
   5   0   9 2952.78 2563.69   1
  -5   0  15 43291.6 5418.73  -2
  -5   0 -10 43291.6 5418.73   1
  -5   0 -11 575.259 904.221   1
  -5   0  16 5684.35 1927.58  -2
  -5   0 -11 5684.35 1927.58   1
  -5   0 -12 13773.0 1248.46   1
  -5   0  17 11998.1 1838.12  -2
  -5   0 -12 11998.1 1838.12   1
  -5   0 -13 402.241 1027.19   1
  -5   0 -14 1715.44 911.244   1
  -5   0 -15 1185.23 826.152   1
  -5   0 -16 10736.9 935.443   1
  -5   0 -17 153.627 621.661   1
  -5   0 -18 18967.2 769.619   1
   5  -1 -23 236.601 399.294   1
   5  -1 -22 95.5164 475.860   1
   5  -1 -21 1505.08 627.512   1
   5  -1 -20 16856.7 1038.81   1
   5  -1 -19 4376.68 888.851   1
   5  -1 -18 94243.2 2434.34   1
   5  -1  12 36923.3 1787.75  -2
   5   1 -17 36923.3 1787.75   1
   5   1  11 141978. 2707.30  -2
   5  -1 -16 141978. 2707.30   1
   5   1  10 13659.2 1346.45  -2
   5  -1 -15 13659.2 1346.45   1
   5  -1 -14 70546.7 5835.17   1
   5   1   9 84435.3 2404.67  -2
   5  -1 -14 84435.3 2404.67   1
   5  -1 -13-3144.40 1416.61   1
   5   1   8 877.380 849.378  -2
   5  -1 -13 877.380 849.378   1
  -5   1  -7 64150.4 2883.24  -2
  -5  -1  12 64150.4 2883.24   1
   5   1   6 8581.95 1752.18  -2
   5  -1 -11 8581.95 1752.18   1
   5   1   5 43022.5 2343.90  -2
   5  -1 -10 43022.5 2343.90   1
   5   1   4 43129.5 2335.62  -2
   5  -1  -9 43129.5 2335.62   1
   5   1   3 5153.18 1505.64  -2
   5  -1  -8 5153.18 1505.64   1
   5   1   2 90466.8 2887.70  -2
   5  -1  -7 90466.8 2887.70   1
   5   1   1 20425.2 1895.14  -2
   5  -1  -6 20425.2 1895.14   1
   5   1  -5 16246.5 994.669   1
   5   1   0 85914.1 2313.58  -2
   5  -1  -5 85914.1 2313.58   1
   5   1  -4 83674.5 2060.13   1
   5   1  -1 87789.7 2248.24  -2
   5  -1  -4 87789.7 2248.24   1
   5   1  -2 66084.2 2238.06  -2
   5  -1  -3 66084.2 2238.06   1
   5   1  -3 112492. 2750.88  -2
   5  -1  -2 112492. 2750.88   1
   5   1  -4 52026.6 1865.96  -2
   5  -1  -1 52026.6 1865.96   1
   5   1  -5 143782. 3767.92  -2
   5  -1   0 143782. 3767.92   1
   5  -1  -6 11105.3 1481.10  -2
   5   1   1 11105.3 1481.10   1
   5  -1  -7 149671. 3887.26  -2
   5   1   2 149671. 3887.26   1
   5   1  -8 4204.73 1541.62  -2
   5  -1   3 4204.73 1541.62   1
   5   1  -9 63629.9 2718.80  -2
   5  -1   4 63629.9 2718.80   1
   5   1 -10 35268.7 2249.46  -2
   5  -1   5 35268.7 2249.46   1
   5   1 -11 17845.3 1843.40  -2
   5  -1   6 17845.3 1843.40   1
   5   1 -12 40980.9 2596.21  -2
   5  -1   7 40980.9 2596.21   1
  -5  -1  13 2288.47 1838.50  -2
  -5   1  -8 2288.47 1838.50   1
   5   1   9 10957.9 1507.87   1
  -5  -1  14 42197.9 3276.40  -2
  -5   1  -9 42197.9 3276.40   1
   5   1  10 21692.7 1549.43   1
  -5  -1  15 21949.0 2104.28  -2
  -5   1 -10 21949.0 2104.28   1
  -5   1 -11 17808.0 1287.21   1
  -5   1  16 85701.1 3002.64  -2
  -5  -1 -11 85701.1 3002.64   1
  -5  -1 -12 54183.8 2091.86   1
  -5  -1  17 54289.9 2503.43  -2
  -5   1 -12 54289.9 2503.43   1
  -5  -1 -13 16077.4 1313.71   1
  -5  -1  18 60573.5 2209.02  -2
  -5   1 -13 60573.5 2209.02   1
  -5  -1 -14 68414.9 1945.24   1
  -5  -1 -15 910.036 842.000   1
  -5  -1 -16 38035.2 1256.37   1
  -5  -1 -17 1279.33 650.855   1
  -5  -1 -18 13305.5 696.045   1
   5  -2 -23 4132.72 593.216   1
   5  -2 -22 16340.9 798.577   1
   5  -2 -21 1922.37 741.210   1
   5  -2 -20 28809.5 1280.68   1
   5  -2 -19-165.965 699.133   1
   5   2 -18 45370.7 1734.68   1
   5   2  13 57578.6 1803.01  -2
   5  -2 -18 57578.6 1803.01   1
   5   2  12 12896.6 1345.93  -2
   5  -2 -17 12896.6 1345.93   1
   5   2  11 24917.1 1594.21  -2
   5  -2 -16 24917.1 1594.21   1
   5   2  10 16178.0 1599.91  -2
   5  -2 -15 16178.0 1599.91   1
   5  -2 -14 1126.81 2089.92   1
   5   2   9 3848.33 1313.84  -2
   5  -2 -14 3848.33 1313.84   1
   5  -2 -13 5592.57 2260.39   1
   5   2   8 40929.1 1794.33  -2
   5  -2 -13 40929.1 1794.33   1
  -5  -2  -7 6555.58 1788.71  -2
  -5   2  12 6555.58 1788.71   1
   5   2   6 106278. 4885.51  -2
   5  -2 -11 106278. 4885.51   1
  -5   2  -5 64511.1 2804.55  -2
  -5  -2  10 64511.1 2804.55   1
  -5   2  -4 70850.6 2815.13  -2
  -5  -2   9 70850.6 2815.13   1
   5   2   3 214783. 4153.07  -2
   5  -2  -8 214783. 4153.07   1
   5   2   2 33704.4 2187.69  -2
   5  -2  -7 33704.4 2187.69   1
   5   2   1 246026. 4511.05  -2
   5  -2  -6 246026. 4511.05   1
   5   2  -5 9934.33 834.209   1
  -5  -2   0 10181.9 1250.78  -2
  -5   2   5 10181.9 1250.78   1
   5   2  -4 148934. 2759.86   1
   5   2  -1 155013. 2494.80  -2
   5  -2  -4 155013. 2494.80   1
   5   2  -2 16790.0 1314.61  -2
   5  -2  -3 16790.0 1314.61   1
   5   2  -3 18820.3 1411.80  -2
   5  -2  -2 18820.3 1411.80   1
   5   2  -4 77627.1 2253.04  -2
   5  -2  -1 77627.1 2253.04   1
   5   2  -5 4002.48 962.589  -2
   5  -2   0 4002.48 962.589   1
   5  -2  -6 191452. 6503.80  -2
   5   2   1 191452. 6503.80   1
   5  -2  -7 37915.4 2241.67  -2
   5   2   2 37915.4 2241.67   1
   5   2  -8 219113. 10648.3  -2
   5  -2   3 219113. 10648.3   1
   5   2  -9 51880.1 2546.49  -2
   5  -2   4 51880.1 2546.49   1
   5   2 -10 65399.5 2814.48  -2
   5  -2   5 65399.5 2814.48   1
   5   2 -11 127971. 8120.36  -2
   5  -2   6 127971. 8120.36   1
   5   2   7 2338.81 1024.42   1
   5   2 -12 3971.29 2125.39  -2
   5  -2   7 3971.29 2125.39   1
   5   2   8 80366.4 3071.35   1
  -5  -2  13 77533.7 2294.28  -2
  -5   2  -8 77533.7 2294.28   1
   5   2   9 2596.35 1115.22   1
  -5  -2  14 4157.37 1707.79  -2
  -5   2  -9 4157.37 1707.79   1
  -5  -2 -10 26237.2 1650.64   1
  -5  -2  15 29624.6 2171.61  -2
  -5   2 -10 29624.6 2171.61   1
  -5   2 -11 8360.10 1062.00   1
  -5   2  16 17543.6 2081.13  -2
  -5  -2 -11 17543.6 2081.13   1
  -5   2 -12 21901.2 1505.40   1
  -5   2  17 19075.4 1836.19  -2
  -5  -2 -12 19075.4 1836.19   1
  -5  -2 -13 16515.0 1333.61   1
  -5   2 -14 639.110 912.775   1
  -5  -2 -15 34960.4 1362.01   1
  -5  -2 -16-300.620 675.499   1
  -5  -2 -17 22243.0 892.095   1
  -5  -2 -18 4840.65 538.191   1
   5   3 -23 4500.36 414.059   1
   5  -3 -22 620.804 476.478   1
   5  -3 -21 8577.44 784.456   1
   5  -3 -20 560.544 724.049   1
   5  -3 -19 6429.63 871.077   1
   5  -3 -18 5828.60 982.277   1
   5  -3  13 21201.5 1247.38  -2
   5   3 -18 21201.5 1247.38   1
   5   3 -17 13563.9 1135.81   1
   5   3  12 13407.5 1293.63  -2
   5  -3 -17 13407.5 1293.63   1
   5   3  11 54766.3 1866.43  -2
   5  -3 -16 54766.3 1866.43   1
   5   3  10 545.590 1101.30  -2
   5  -3 -15 545.590 1101.30   1
   5  -3 -14 18160.8 2180.95   1
   5   3   9 25665.0 1798.37  -2
   5  -3 -14 25665.0 1798.37   1
   5  -3 -13 7263.82 2151.49   1
   5   3   8 8988.43 1390.12  -2
   5  -3 -13 8988.43 1390.12   1
   5   3 -12 16140.6 1308.74   1
   5   3   7 36563.4 2340.26  -2
   5  -3 -12 36563.4 2340.26   1
   5   3   6 23555.6 2090.11  -2
   5  -3 -11 23555.6 2090.11   1
  -5   3  -5 26618.4 2119.56  -2
  -5  -3  10 26618.4 2119.56   1
   5   3   4 86249.9 2998.03  -2
   5  -3  -9 86249.9 2998.03   1
   5   3   3 18104.9 1870.82  -2
   5  -3  -8 18104.9 1870.82   1
   5   3   2 64776.1 2458.64  -2
   5  -3  -7 64776.1 2458.64   1
   5   3   1 12609.9 1456.02  -2
   5  -3  -6 12609.9 1456.02   1
   5   3  -5 22130.0 1219.99   1
   5   3   0 26721.8 1776.41  -2
   5  -3  -5 26721.8 1776.41   1
   5   3  -1 6322.78 1061.21  -2
   5  -3  -4 6322.78 1061.21   1
   5   3  -2 9069.57 1200.64  -2
   5  -3  -3 9069.57 1200.64   1
   5   3  -3 9840.85 1236.75  -2
   5  -3  -2 9840.85 1236.75   1
   5   3  -4 13262.9 1273.20  -2
   5  -3  -1 13262.9 1273.20   1
   5   3  -5 17706.6 1516.15  -2
   5  -3   0 17706.6 1516.15   1
   5  -3  -6 11215.1 1631.26  -2
   5   3   1 11215.1 1631.26   1
   5  -3  -7 43854.1 2259.16  -2
   5   3   2 43854.1 2259.16   1
   5  -3  -8 19944.0 1833.32  -2
   5   3   3 19944.0 1833.32   1
   5  -3  -9 83785.0 3023.11  -2
   5   3   4 83785.0 3023.11   1
   5   3 -10 57456.0 4982.21  -2
   5  -3   5 57456.0 4982.21   1
   5  -3 -11 48496.7 3525.05  -2
   5   3   6 48496.7 3525.05   1
   5   3   7 43535.8 2277.92   1
   5   3 -12 44614.7 3015.47  -2
   5  -3   7 44614.7 3015.47   1
   5   3   8 6931.05 1322.86   1
  -5  -3  13 10156.8 1633.02  -2
  -5   3  -8 10156.8 1633.02   1
   5   3   9 18983.6 1420.88   1
  -5  -3  14 26287.8 2520.16  -2
  -5   3  -9 26287.8 2520.16   1
  -5   3 -10 1312.21 978.037   1
  -5  -3  15 373.134 1638.85  -2
  -5   3 -10 373.134 1638.85   1
  -5   3 -11 54471.8 1808.79   1
  -5   3  16 63938.8 2401.85  -2
  -5  -3 -11 63938.8 2401.85   1
  -5  -3 -12-169.107 955.284   1
  -5  -3  17 7287.27 1711.45  -2
  -5   3 -12 7287.27 1711.45   1
  -5  -3 -13 32601.4 1667.62   1
  -5  -3 -14 1841.80 956.050   1
  -5  -3 -15 1447.00 812.474   1
  -5  -3 -16 13312.2 912.103   1
  -5  -3 -17 14232.9 774.746   1
  -5   3 -18 14560.1 739.478   1
   5   4 -23 155.913 339.565   1
   5   4 -22-25.0987 477.356   1
   5  -4 -21 4085.04 930.562   1
   5  -4 -20 590.630 641.008   1
   5  -4 -19 7961.14 899.892   1
   5   4 -18 8406.17 994.526   1
   5   4  13 32148.8 1434.55  -2
   5  -4 -18 32148.8 1434.55   1
   5   4  12 9800.97 1213.08  -2
   5  -4 -17 9800.97 1213.08   1
   5   4  11 35927.8 1657.95  -2
   5  -4 -16 35927.8 1657.95   1
   5   4  10 3837.16 1139.44  -2
   5  -4 -15 3837.16 1139.44   1
   5   4 -14 25968.4 3265.41   1
   5   4   9 33825.3 1741.40  -2
   5  -4 -14 33825.3 1741.40   1
   5  -4 -13 11342.3 1846.36   1
   5   4   8 17925.4 1296.77  -2
   5  -4 -13 17925.4 1296.77   1
   5  -4 -12 7219.53 1344.42   1
   5  -4   7 6973.23 1425.75  -2
   5   4 -12 6973.23 1425.75   1
   5   4 -11 14496.2 2118.63   1
   5   4   6 16021.2 1831.14  -2
   5  -4 -11 16021.2 1831.14   1
   5   4   5 4546.36 1569.62  -2
   5  -4 -10 4546.36 1569.62   1
   5   4   4 9871.14 1730.31  -2
   5  -4  -9 9871.14 1730.31   1
   5  -4  -8 7096.39 1196.93   1
   5   4   3 34718.2 2132.45  -2
   5  -4  -8 34718.2 2132.45   1
   5   4   2 10707.5 1533.01  -2
   5  -4  -7 10707.5 1533.01   1
   5   4   1 55597.3 2295.38  -2
   5  -4  -6 55597.3 2295.38   1
   5   4  -5 641.851 637.994   1
  -5   4   0 26745.8 1738.50  -2
  -5  -4   5 26745.8 1738.50   1
  -5   4   4 45174.6 4040.59   1
   5   4  -1 74170.3 3493.47  -2
   5  -4  -4 74170.3 3493.47   1
  -5   4   2 54266.1 2007.60  -2
  -5  -4   3 54266.1 2007.60   1
   5   4  -3 86465.7 2299.65  -2
   5  -4  -2 86465.7 2299.65   1
   5   4  -4 90128.3 2398.68  -2
   5  -4  -1 90128.3 2398.68   1
   5   4  -5 50219.9 2092.49  -2
   5  -4   0 50219.9 2092.49   1
   5  -4  -6 90807.1 2965.86  -2
   5   4   1 90807.1 2965.86   1
   5  -4  -7 11204.8 3466.50  -2
   5   4   2 11204.8 3466.50   1
   5  -4  -8 59432.3 2940.70  -2
   5   4   3 59432.3 2940.70   1
   5  -4  -9 14639.7 1866.30  -2
   5   4   4 14639.7 1866.30   1
   5  -4 -10 2906.03 1820.11  -2
   5   4   5 2906.03 1820.11   1
   5  -4 -11 7469.96 2075.73  -2
   5   4   6 7469.96 2075.73   1
   5   4   7 607.131 1057.11   1
  -5  -4  12 2634.55 1370.42  -2
  -5   4  -7 2634.55 1370.42   1
   5   4   8 7555.71 1357.40   1
  -5  -4  13 13884.8 1839.08  -2
  -5   4  -8 13884.8 1839.08   1
   5   4   9 12598.2 1486.27   1
  -5  -4  14 21788.8 2071.99  -2
  -5   4  -9 21788.8 2071.99   1
  -5  -4 -10 2322.82 739.577   1
  -5  -4  15 3338.99 1568.69  -2
  -5   4 -10 3338.99 1568.69   1
  -5   4 -11 24636.6 1574.43   1
  -5  -4  16 31450.3 1937.63  -2
  -5   4 -11 31450.3 1937.63   1
  -5   4 -12 15728.7 1343.50   1
  -5   4  17 15782.5 1657.93  -2
  -5  -4 -12 15782.5 1657.93   1
  -5  -4 -13 49146.9 1893.75   1
  -5  -4 -14 25186.6 1372.48   1
  -5  -4 -15 30062.9 1292.67   1
  -5  -4 -16 19581.1 1000.50   1
  -5   4 -17 9271.49 1393.47   1
  -5   4 -18 4595.66 557.771   1
  -5  -5  23 4886.01 388.154   1
  -5   5  22 135.011 493.453   1
   5   5 -21 6271.75 777.130   1
   5   5 -20 1928.29 656.640   1
   5  -5 -19 262.909 676.271   1
   5  -5 -18 11726.1 1035.30   1
   5   5  12 15432.8 1275.81  -2
   5  -5 -17 15432.8 1275.81   1
   5   5  11 15515.7 1337.34  -2
   5  -5 -16 15515.7 1337.34   1
   5   5  10 65299.4 2019.92  -2
   5  -5 -15 65299.4 2019.92   1
   5   5   9 19183.6 1542.79  -2
   5  -5 -14 19183.6 1542.79   1
   5   5   8 47818.0 2072.03  -2
   5  -5 -13 47818.0 2072.03   1
   5  -5 -12 3820.87 1387.41   1
   5  -5   7 15655.4 1627.35  -2
   5   5 -12 15655.4 1627.35   1
   5   5 -11 72269.5 3621.04   1
   5   5   6 88857.5 3610.36  -2
   5  -5 -11 88857.5 3610.36   1
   5   5   5 4203.81 1697.42  -2
   5  -5 -10 4203.81 1697.42   1
  -5   5  -4 61431.1 2829.82  -2
  -5  -5   9 61431.1 2829.82   1
   5   5   3 34519.9 2304.71  -2
   5  -5  -8 34519.9 2304.71   1
   5   5   2 9287.35 1523.23  -2
   5  -5  -7 9287.35 1523.23   1
   5   5  -6 31243.8 1435.06   1
   5   5   1 44860.4 2168.86  -2
   5  -5  -6 44860.4 2168.86   1
   5   5  -5 2939.52 773.259   1
  -5   5   0 9893.35 1501.45  -2
  -5  -5   5 9893.35 1501.45   1
   5   5  -4 93682.6 2577.31   1
   5   5  -1 100245. 2804.88  -2
   5  -5  -4 100245. 2804.88   1
   5   5  -2 42230.6 1981.54  -2
   5  -5  -3 42230.6 1981.54   1
   5   5  -3 82531.7 2661.40  -2
   5  -5  -2 82531.7 2661.40   1
   5   5  -4 87643.3 2672.67  -2
   5  -5  -1 87643.3 2672.67   1
   5   5  -5 13836.6 1441.62  -2
   5  -5   0 13836.6 1441.62   1
   5  -5  -6 51224.0 2575.80  -2
   5   5   1 51224.0 2575.80   1
   5  -5  -7 6578.32 1602.23  -2
   5   5   2 6578.32 1602.23   1
   5  -5  -8 68057.8 7155.32  -2
   5   5   3 68057.8 7155.32   1
   5  -5  -9 41498.2 2658.94  -2
   5   5   4 41498.2 2658.94   1
   5  -5 -10 8537.33 2452.90  -2
   5   5   5 8537.33 2452.90   1
   5   5   6 54663.9 2547.25   1
   5   5 -11 77281.9 3839.89  -2
   5  -5   6 77281.9 3839.89   1
   5   5   7 25903.6 1899.57   1
  -5  -5  12 27735.8 1619.01  -2
  -5   5  -7 27735.8 1619.01   1
   5   5   8 79653.8 3114.61   1
  -5  -5  13 83234.2 2888.85  -2
  -5   5  -8 83234.2 2888.85   1
   5   5   9 22175.4 3327.61   1
  -5  -5  14 24432.4 2111.44  -2
  -5   5  -9 24432.4 2111.44   1
  -5   5 -10 77091.8 2330.70   1
  -5  -5  15 87088.2 2902.62  -2
  -5   5 -10 87088.2 2902.62   1
  -5   5  16 6887.20 1530.28  -2
  -5  -5 -11 6887.20 1530.28   1
  -5   5 -12 24069.6 1351.29   1
  -5   5  17 23933.0 1730.67  -2
  -5  -5 -12 23933.0 1730.67   1
  -5  -5 -13 3099.42 1023.25   1
  -5  -5 -14 1231.53 837.399   1
  -5   5 -15 8744.95 983.863   1
  -5   5 -16 550.541 670.996   1
  -5   5 -17 2693.76 580.602   1
  -5   5 -18 5115.79 699.888   1
   5   6 -22 5308.16 562.195   1
   5   6 -21 33464.7 3737.98   1
   5   6 -20 6730.57 769.169   1
   5   6 -19 22831.3 1149.13   1
   5   6 -18 1323.66 746.182   1
   5  -6  12 14721.3 1255.10  -2
   5   6 -17 14721.3 1255.10   1
   5  -6  11 29212.4 1413.41  -2
   5   6 -16 29212.4 1413.41   1
   5  -6  10 915.024 930.509  -2
   5   6 -15 915.024 930.509   1
   5  -6   9 77412.1 2207.10  -2
   5   6 -14 77412.1 2207.10   1
   5  -6   8 2221.42 1358.06  -2
   5   6 -13 2221.42 1358.06   1
   5  -6   7 74141.3 2383.12  -2
   5   6 -12 74141.3 2383.12   1
  -5   6  -6 35578.8 2017.13  -2
  -5  -6  11 35578.8 2017.13   1
   5   6   5 38139.6 2903.28  -2
   5  -6 -10 38139.6 2903.28   1
   5   6   4 40914.7 2481.77  -2
   5  -6  -9 40914.7 2481.77   1
   5   6   3 30403.4 2175.02  -2
   5  -6  -8 30403.4 2175.02   1
   5   6   2 80412.6 2906.42  -2
   5  -6  -7 80412.6 2906.42   1
   5   6  -6 6073.39 889.210   1
   5   6   1 7185.93 1362.28  -2
   5  -6  -6 7185.93 1362.28   1
   5   6  -5 66560.8 2244.59   1
   5   6   0 85784.6 3272.65  -2
   5  -6  -5 85784.6 3272.65   1
   5   6  -4 953.430 863.526   1
   5   6  -1 26413.0 1869.18  -2
   5  -6  -4 26413.0 1869.18   1
   5   6  -2 116490. 3294.64  -2
   5  -6  -3 116490. 3294.64   1
   5   6  -3 74773.3 2885.29  -2
   5  -6  -2 74773.3 2885.29   1
   5   6  -4 55733.0 2294.98  -2
   5  -6  -1 55733.0 2294.98   1
   5   6  -5 89704.2 3099.65  -2
   5  -6   0 89704.2 3099.65   1
   5  -6  -6 2779.50 1613.78  -2
   5   6   1 2779.50 1613.78   1
   5  -6  -7 70288.1 3624.20  -2
   5   6   2 70288.1 3624.20   1
   5  -6  -8 23736.9 2226.89  -2
   5   6   3 23736.9 2226.89   1
   5  -6  -9 41700.0 4186.21  -2
   5   6   4 41700.0 4186.21   1
   5  -6 -10 64686.0 6313.29  -2
   5   6   5 64686.0 6313.29   1
  -5  -6  11 55473.0 2201.94  -2
  -5   6  -6 55473.0 2201.94   1
   5   6   7 37230.9 2341.35   1
  -5  -6  12 64803.1 2238.43  -2
  -5   6  -7 64803.1 2238.43   1
   5   6   8-200.722 1243.24   1
  -5  -6  13 1397.63 1377.21  -2
  -5   6  -8 1397.63 1377.21   1
  -5  -6  14 115525. 2474.60  -2
  -5   6  -9 115525. 2474.60   1
  -5  -6  15 3841.17 1334.11  -2
  -5   6 -10 3841.17 1334.11   1
  -5   6 -11 60083.2 2081.60   1
  -5  -6  16 60932.0 2557.05  -2
  -5   6 -11 60932.0 2557.05   1
  -5   6 -12 18040.9 1349.91   1
  -5   6 -13 16879.5 1407.92   1
  -5   6 -14 7451.89 1048.84   1
  -5   6 -15 97.7854 768.385   1
  -5   6 -16 6841.44 797.534   1
  -5   6 -17 4123.42 594.086   1
  -5   6 -18 18313.7 691.544   1
   5   7 -22-116.198 422.138   1
   5   7 -21 940.357 536.688   1
   5   7 -20 1977.59 552.375   1
   5   7 -19 8566.05 856.568   1
   5   7 -18 2391.62 781.650   1
   5   7 -17 43564.8 1385.18   1
   5  -7  12 52297.7 3641.20  -2
   5   7 -17 52297.7 3641.20   1
   5   7 -16 8047.18 867.078   1
   5  -7  11 18810.2 1416.12  -2
   5   7 -16 18810.2 1416.12   1
   5  -7  10 117433. 2464.83  -2
   5   7 -15 117433. 2464.83   1
   5  -7   9 14318.7 1430.15  -2
   5   7 -14 14318.7 1430.15   1
   5  -7   8 148226. 2980.73  -2
   5   7 -13 148226. 2980.73   1
   5   7 -12 2536.28 2218.16   1
   5  -7   7 2964.54 1430.91  -2
   5   7 -12 2964.54 1430.91   1
   5  -7   6 121562. 3083.77  -2
   5   7 -11 121562. 3083.77   1
   5  -7   5 7552.44 1625.88  -2
   5   7 -10 7552.44 1625.88   1
   5   7   4 24343.6 2134.02  -2
   5  -7  -9 24343.6 2134.02   1
   5   7   3 30081.1 2512.62  -2
   5  -7  -8 30081.1 2512.62   1
   5   7   2 10234.6 1632.18  -2
   5  -7  -7 10234.6 1632.18   1
   5   7  -6 1285.32 805.122   1
   5   7   1 81421.4 3126.55  -2
   5  -7  -6 81421.4 3126.55   1
   5   7  -5 31891.4 1778.58   1
   5   7   0 32009.8 2273.68  -2
   5  -7  -5 32009.8 2273.68   1
   5   7  -1 123414. 4424.97  -2
   5  -7  -4 123414. 4424.97   1
   5   7  -2 217667. 4580.73  -2
   5  -7  -3 217667. 4580.73   1
   5   7  -3 126752. 3423.39  -2
   5  -7  -2 126752. 3423.39   1
   5   7  -4 236660. 4560.06  -2
   5  -7  -1 236660. 4560.06   1
   5   7  -5 21391.3 1803.16  -2
   5  -7   0 21391.3 1803.16   1
   5  -7  -6 180126. 4784.03  -2
   5   7   1 180126. 4784.03   1
   5  -7  -7 15768.1 1977.29  -2
   5   7   2 15768.1 1977.29   1
   5  -7  -8 61567.8 5309.06  -2
   5   7   3 61567.8 5309.06   1
   5  -7  -9 18536.6 2569.50  -2
   5   7   4 18536.6 2569.50   1
   5  -7 -10 8632.01 3340.96  -2
   5   7   5 8632.01 3340.96   1
   5   7   6 1754.00 1311.36   1
  -5  -7  11 59344.3 1942.82  -2
  -5   7  -6 59344.3 1942.82   1
   5   7   7-241.991 1309.70   1
  -5  -7  12 1446.94 1263.51  -2
  -5   7  -7 1446.94 1263.51   1
   5   7   8 38784.6 2603.92   1
  -5  -7  13 99689.2 2713.41  -2
  -5   7  -8 99689.2 2713.41   1
  -5   7  -9 8779.81 1228.09   1
  -5  -7  14 13792.9 2306.77  -2
  -5   7  -9 13792.9 2306.77   1
  -5  -7  15 95510.7 2418.78  -2
  -5   7 -10 95510.7 2418.78   1
  -5  -7  16 28022.2 1573.69  -2
  -5   7 -11 28022.2 1573.69   1
  -5   7 -12 20187.8 1533.80   1
  -5  -7  17 44350.4 1805.98  -2
  -5   7 -12 44350.4 1805.98   1
  -5   7 -13 46435.4 1539.55   1
  -5   7 -14 7914.25 885.112   1
  -5   7 -15 40479.3 2094.16   1
  -5   7 -16 4709.41 717.650   1
  -5   7 -17 15872.2 747.841   1
   5   8 -22 2859.67 427.288   1
   5   8 -21 43619.7 1081.29   1
   5   8 -20 1553.72 573.305   1
   5   8 -19 34145.2 1112.14   1
   5   8 -18 666.255 689.874   1
  -5  -8 -13 157.710 425.216  -2
  -5   8  18 157.710 425.216   1
   5   8 -17 26633.2 1146.22   1
   5  -8  12 30840.7 2314.71  -2
   5   8 -17 30840.7 2314.71   1
   5  -8  11 18142.0 1311.87  -2
   5   8 -16 18142.0 1311.87   1
   5  -8  10 1117.81 1118.41  -2
   5   8 -15 1117.81 1118.41   1
   5  -8   9 49421.6 1793.65  -2
   5   8 -14 49421.6 1793.65   1
   5  -8   8 34304.2 2136.64  -2
   5   8 -13 34304.2 2136.64   1
   5  -8   7 55013.6 2409.48  -2
   5   8 -12 55013.6 2409.48   1
   5  -8   6 110567. 3043.54  -2
   5   8 -11 110567. 3043.54   1
  -5  -8  -5 40533.7 2099.28  -2
  -5   8  10 40533.7 2099.28   1
   5   8   4 105939. 4626.49  -2
   5  -8  -9 105939. 4626.49   1
   5   8   3 35409.9 2514.06  -2
   5  -8  -8 35409.9 2514.06   1
  -5   8  -2 116144. 7676.88  -2
  -5  -8   7 116144. 7676.88   1
   5   8  -6 6955.09 993.527   1
   5   8   1 16047.5 1695.58  -2
   5  -8  -6 16047.5 1695.58   1
   5   8  -5 124561. 3225.97   1
   5   8   0 112594. 3520.98  -2
   5  -8  -5 112594. 3520.98   1
   5   8  -1 3346.38 1319.73  -2
   5  -8  -4 3346.38 1319.73   1
   5   8  -3 114375. 3339.33   1
   5   8  -2 102314. 3083.82  -2
   5  -8  -3 102314. 3083.82   1
   5   8  -3 51744.4 2989.87  -2
   5  -8  -2 51744.4 2989.87   1
   5   8  -4 3631.18 1405.47  -2
   5  -8  -1 3631.18 1405.47   1
   5   8  -5 62853.3 2526.29  -2
   5  -8   0 62853.3 2526.29   1
   5  -8  -6 27275.6 3177.16  -2
   5   8   1 27275.6 3177.16   1
   5  -8  -7 69554.6 3278.76  -2
   5   8   2 69554.6 3278.76   1
   5  -8  -8 69011.8 3252.79  -2
   5   8   3 69011.8 3252.79   1
   5  -8  -9 61825.0 3202.51  -2
   5   8   4 61825.0 3202.51   1
  -5  -8  10 85901.0 3149.13  -2
  -5   8  -5 85901.0 3149.13   1
   5   8   6 3651.86 1304.92   1
  -5   8  11 55884.5 2434.28  -2
  -5  -8  -6 55884.5 2434.28   1
   5   8   7 127057. 3975.62   1
  -5  -8  12 121782. 3326.09  -2
  -5   8  -7 121782. 3326.09   1
  -5  -8  13 17943.2 1425.32  -2
  -5   8  -8 17943.2 1425.32   1
  -5  -8  -9 98342.7 1815.62   1
  -5  -8  14 102257. 2629.32  -2
  -5   8  -9 102257. 2629.32   1
  -5  -8  15 138.298 1192.95  -2
  -5   8 -10 138.298 1192.95   1
  -5   8 -11 39523.4 1666.23   1
  -5  -8  16 40500.6 1731.44  -2
  -5   8 -11 40500.6 1731.44   1
  -5   8 -12 986.587 905.491   1
  -5  -8  17 13172.4 1161.59  -2
  -5   8 -12 13172.4 1161.59   1
  -5   8 -13 1860.06 849.127   1
  -5   8 -14 1376.88 765.401   1
  -5   8 -15 4288.96 678.191   1
  -5   8 -16 4805.69 676.383   1
  -5   8 -17 26277.0 1171.19   1
   5   9 -21 3058.39 477.002   1
   5   9 -20 3949.00 583.023   1
   5   9 -19 9733.47 809.967   1
   5   9 -18 2076.04 622.253   1
  -5  -9 -12 38658.8 1383.99  -2
  -5   9  17 38658.8 1383.99   1
  -5  -9 -11 14759.1 1320.49  -2
  -5   9  16 14759.1 1320.49   1
  -5  -9 -10 90338.7 2326.28  -2
  -5   9  15 90338.7 2326.28   1
   5  -9   9 14733.3 1377.30  -2
   5   9 -14 14733.3 1377.30   1
   5  -9   8 154125. 3061.30  -2
   5   9 -13 154125. 3061.30   1
   5  -9   7 1989.17 1231.98  -2
   5   9 -12 1989.17 1231.98   1
  -5  -9  -6 79496.3 2394.77  -2
  -5   9  11 79496.3 2394.77   1
  -5   9  -5 17839.4 1582.26  -2
  -5  -9  10 17839.4 1582.26   1
  -5  -9  -4 17097.2 1417.86  -2
  -5   9   9 17097.2 1417.86   1
   5   9   3 48235.3 2833.11  -2
   5  -9  -8 48235.3 2833.11   1
   5   9   2 6458.24 1667.53  -2
   5  -9  -7 6458.24 1667.53   1
   5   9  -6 20178.3 1537.62   1
   5   9   1 74008.9 3090.12  -2
   5  -9  -6 74008.9 3090.12   1
   5   9  -5 19876.3 1550.10   1
   5  -9   0 16729.5 1782.26  -2
   5   9  -5 16729.5 1782.26   1
   5   9  -4 15758.1 1613.52   1
   5   9  -1 107658. 3486.42  -2
   5  -9  -4 107658. 3486.42   1
   5  -9  -2 140409. 3711.11  -2
   5   9  -3 140409. 3711.11   1
   5   9  -3 65683.0 2910.14  -2
   5  -9  -2 65683.0 2910.14   1
   5   9  -4 197741. 8513.90  -2
   5  -9  -1 197741. 8513.90   1
   5   9  -5 10815.3 2939.36  -2
   5  -9   0 10815.3 2939.36   1
   5   9  -6 138787. 5073.37  -2
   5  -9   1 138787. 5073.37   1
   5  -9  -7 17513.5 2108.86  -2
   5   9   2 17513.5 2108.86   1
   5  -9  -8 74743.2 3513.44  -2
   5   9   3 74743.2 3513.44   1
  -5   9   9 18955.2 1819.56  -2
  -5  -9  -4 18955.2 1819.56   1
  -5   9  10 11662.3 1497.08  -2
  -5  -9  -5 11662.3 1497.08   1
  -5   9  11 57265.5 2094.91  -2
  -5  -9  -6 57265.5 2094.91   1
  -5  -9  12 822.714 1111.12  -2
  -5   9  -7 822.714 1111.12   1
  -5  -9  13 85532.3 2027.57  -2
  -5   9  -8 85532.3 2027.57   1
  -5  -9  14 31353.0 1617.65  -2
  -5   9  -9 31353.0 1617.65   1
  -5  -9  15 52868.1 1822.46  -2
  -5   9 -10 52868.1 1822.46   1
  -5   9 -11 36258.7 1610.28   1
  -5  -9  16 34691.4 1617.41  -2
  -5   9 -11 34691.4 1617.41   1
  -5   9 -12 305.662 833.285   1
  -5  -9  17 20653.4 1694.80  -2
  -5   9 -12 20653.4 1694.80   1
  -5   9 -13 41340.3 4566.47   1
  -5  -9  18 43723.8 1653.72  -2
  -5   9 -13 43723.8 1653.72   1
  -5   9 -14 2737.34 729.817   1
  -5   9 -15 30403.1 1348.30   1
  -5   9 -16 2125.58 556.207   1
  -5   9 -17 16633.8 624.648   1
   5  10 -21 18867.1 595.788   1
   5  10 -20 254.399 428.406   1
   5  10 -19 16015.4 791.089   1
   5  10 -18 588.135 609.537   1
   5  10 -17 10994.7 1067.83   1
  -5 -10 -12 21131.1 1055.74  -2
  -5  10  17 21131.1 1055.74   1
   5  10 -16 1800.03 649.406   1
  -5 -10 -11 10451.3 1126.95  -2
  -5  10  16 10451.3 1126.95   1
  -5 -10 -10 3071.42 996.995  -2
  -5  10  15 3071.42 996.995   1
  -5 -10  -9 26730.5 1445.27  -2
  -5  10  14 26730.5 1445.27   1
  -5 -10  -8 11761.0 1259.11  -2
  -5  10  13 11761.0 1259.11   1
  -5 -10  -7 42132.5 1767.89  -2
  -5  10  12 42132.5 1767.89   1
   5  10 -11 64087.8 1796.57   1
  -5 -10  -6 69100.3 1885.30  -2
  -5  10  11 69100.3 1885.30   1
  -5 -10  -5 21812.6 1733.60  -2
  -5  10  10 21812.6 1733.60   1
  -5 -10  -4 52289.3 2138.68  -2
  -5  10   9 52289.3 2138.68   1
  -5 -10  -3 8594.41 1934.66  -2
  -5  10   8 8594.41 1934.66   1
  -5 -10  -2 57561.9 2046.20  -2
  -5  10   7 57561.9 2046.20   1
   5  10   1 932.188 1304.99  -2
   5 -10  -6 932.188 1304.99   1
   5  10   0 54070.8 4314.51  -2
   5 -10  -5 54070.8 4314.51   1
   5  10  -1 3606.45 1391.04  -2
   5 -10  -4 3606.45 1391.04   1
   5  10  -2 49047.3 2504.64  -2
   5 -10  -3 49047.3 2504.64   1
   5 -10  -3 40646.8 2599.30  -2
   5  10  -2 40646.8 2599.30   1
   5  10  -4 5782.73 1592.60  -2
   5 -10  -1 5782.73 1592.60   1
   5  10  -5 55698.8 3077.59  -2
   5 -10   0 55698.8 3077.59   1
   5  10  -6 4628.66 1737.95  -2
   5 -10   1 4628.66 1737.95   1
  -5  10   7 41836.3 2418.99  -2
  -5 -10  -2 41836.3 2418.99   1
  -5  10   8 16161.8 1903.10  -2
  -5 -10  -3 16161.8 1903.10   1
  -5  10   9 39188.0 2299.22  -2
  -5 -10  -4 39188.0 2299.22   1
  -5  10  10 30285.0 1826.45  -2
  -5 -10  -5 30285.0 1826.45   1
  -5  10  11 59402.8 2316.84  -2
  -5 -10  -6 59402.8 2316.84   1
  -5 -10  12 66161.9 2074.29  -2
  -5  10  -7 66161.9 2074.29   1
  -5 -10  13 14901.2 1352.90  -2
  -5  10  -8 14901.2 1352.90   1
  -5 -10  -9 31294.8 1176.69   1
  -5 -10  14 36326.5 1781.90  -2
  -5  10  -9 36326.5 1781.90   1
  -5 -10 -10 3631.74 668.883   1
  -5 -10  15 5259.81 1125.44  -2
  -5  10 -10 5259.81 1125.44   1
  -5  10 -11 24930.9 1377.97   1
  -5 -10  16 25151.3 1359.70  -2
  -5  10 -11 25151.3 1359.70   1
  -5  10 -12 24105.1 1961.24   1
  -5 -10  17 30532.9 1363.09  -2
  -5  10 -12 30532.9 1363.09   1
  -5  10 -13 2146.59 787.276   1
  -5 -10  18 1511.20 925.123  -2
  -5  10 -13 1511.20 925.123   1
  -5  10 -14 32367.3 1228.42   1
  -5  10 -15 332.523 517.288   1
  -5  10 -16 19631.6 829.705   1
   5  11 -20 1997.06 395.621   1
   5  11 -19 322.682 458.519   1
   5  11 -18 6560.26 696.755   1
   5  11 -17 3942.35 718.933   1
   5 -11  12 4162.15 822.419  -2
   5  11 -17 4162.15 822.419   1
   5  11 -16 5664.40 981.077   1
  -5 -11 -11 6220.64 897.079  -2
  -5  11  16 6220.64 897.079   1
  -5 -11 -10 18901.0 1179.10  -2
  -5  11  15 18901.0 1179.10   1
  -5 -11  -9 2163.20 1049.19  -2
  -5  11  14 2163.20 1049.19   1
   5  11 -13 16773.1 1026.11   1
  -5 -11  -8 44522.7 1713.74  -2
  -5  11  13 44522.7 1713.74   1
  -5 -11  -7 7487.89 1185.80  -2
  -5  11  12 7487.89 1185.80   1
  -5 -11  -6 32544.8 2190.73  -2
  -5  11  11 32544.8 2190.73   1
  -5 -11  -5 27819.4 1648.58  -2
  -5  11  10 27819.4 1648.58   1
  -5 -11  -4 25172.5 1743.41  -2
  -5  11   9 25172.5 1743.41   1
  -5 -11  -3 28447.2 1518.49  -2
  -5  11   8 28447.2 1518.49   1
  -5 -11  -2 19293.4 1409.90  -2
  -5  11   7 19293.4 1409.90   1
  -5 -11  -1 83613.1 3189.52  -2
  -5  11   6 83613.1 3189.52   1
   5  11   0 3192.98 1181.77  -2
   5 -11  -5 3192.98 1181.77   1
   5  11  -1 81233.0 2538.78  -2
   5 -11  -4 81233.0 2538.78   1
   5  11  -2 9883.22 1290.27  -2
   5 -11  -3 9883.22 1290.27   1
  -5  11   3 24703.4 1723.48  -2
  -5 -11   2 24703.4 1723.48   1
  -5  11   4 51175.0 2706.00  -2
  -5 -11   1 51175.0 2706.00   1
  -5  11   5 6848.29 1446.42  -2
  -5 -11   0 6848.29 1446.42   1
   5  11  -6 69287.8 2722.90  -2
   5 -11   1 69287.8 2722.90   1
   5  11  -7 37649.1 2213.20  -2
   5 -11   2 37649.1 2213.20   1
  -5  11   8 32442.9 2090.76  -2
  -5 -11  -3 32442.9 2090.76   1
  -5  11   9 31651.6 1802.33  -2
  -5 -11  -4 31651.6 1802.33   1
  -5  11  10 17968.3 1502.94  -2
  -5 -11  -5 17968.3 1502.94   1
  -5  11  11 46748.5 1784.52  -2
  -5 -11  -6 46748.5 1784.52   1
  -5  11  12 10753.7 1275.20  -2
  -5 -11  -7 10753.7 1275.20   1
  -5 -11  13 68700.2 2077.94  -2
  -5  11  -8 68700.2 2077.94   1
  -5 -11  -9 802.692 645.153   1
  -5 -11  14 2671.69 1093.21  -2
  -5  11  -9 2671.69 1093.21   1
  -5 -11 -10 33029.1 1129.61   1
  -5 -11  15 35890.9 1616.97  -2
  -5  11 -10 35890.9 1616.97   1
  -5 -11  16 4067.83 1055.15  -2
  -5  11 -11 4067.83 1055.15   1
  -5  11 -12 602.829 743.671   1
  -5 -11  17 2963.93 943.741  -2
  -5  11 -12 2963.93 943.741   1
  -5  11 -13 2082.66 722.433   1
  -5 -11  18 5233.90 866.407  -2
  -5  11 -13 5233.90 866.407   1
  -5  11 -14 4209.56 654.469   1
  -5  11 -15 4355.73 513.575   1
  -5  11 -16 760.172 433.486   1
   5  12 -20 82.3248 400.426   1
   5  12 -19 753.602 440.543   1
   5  12 -18 9465.45 701.150   1
   5  12 -17 473.895 571.061   1
   5  12 -16 9165.24 975.317   1
   5 -12  11 10975.2 890.383  -2
   5  12 -16 10975.2 890.383   1
   5  12 -15 3017.93 664.428   1
   5 -12  10 9180.50 3244.69  -2
   5  12 -15 9180.50 3244.69   1
  -5 -12  -9 14938.1 1257.08  -2
  -5  12  14 14938.1 1257.08   1
  -5 -12  -8 17292.7 1260.26  -2
  -5  12  13 17292.7 1260.26   1
  -5 -12  -7 7435.79 1154.64  -2
  -5  12  12 7435.79 1154.64   1
  -5 -12  -6 14374.4 1649.85  -2
  -5  12  11 14374.4 1649.85   1
  -5 -12  -5 494.437 937.990  -2
  -5  12  10 494.437 937.990   1
   5  12  -9 1085.07 1037.49   1
  -5 -12  -4 5484.21 1204.05  -2
  -5  12   9 5484.21 1204.05   1
  -5 -12  -3 8619.40 1083.44  -2
  -5  12   8 8619.40 1083.44   1
  -5  12  -2 11710.6 1190.02  -2
  -5 -12   7 11710.6 1190.02   1
  -5  12  -1 21173.6 1506.79  -2
  -5 -12   6 21173.6 1506.79   1
   5  12   0 17120.2 1735.34  -2
   5 -12  -5 17120.2 1735.34   1
   5  12  -1 21242.3 1587.57  -2
   5 -12  -4 21242.3 1587.57   1
   5  12  -2 21435.1 1532.70  -2
   5 -12  -3 21435.1 1532.70   1
  -5  12   3 41074.5 1984.01  -2
  -5 -12   2 41074.5 1984.01   1
  -5  12   4 22016.2 1632.45  -2
  -5 -12   1 22016.2 1632.45   1
  -5  12   5 28769.5 1880.16  -2
  -5 -12   0 28769.5 1880.16   1
   5  12  -6 38637.8 2244.16  -2
   5 -12   1 38637.8 2244.16   1
   5  12  -7 12877.6 1802.00  -2
   5 -12   2 12877.6 1802.00   1
  -5  12   8 19757.0 1778.29  -2
  -5 -12  -3 19757.0 1778.29   1
  -5  12   9 14568.2 1515.85  -2
  -5 -12  -4 14568.2 1515.85   1
  -5  12  10 980.490 1221.70  -2
  -5 -12  -5 980.490 1221.70   1
  -5  12  11 18811.9 1465.73  -2
  -5 -12  -6 18811.9 1465.73   1
  -5  12  12 8808.17 1252.76  -2
  -5 -12  -7 8808.17 1252.76   1
  -5 -12  13 7937.77 1189.97  -2
  -5  12  -8 7937.77 1189.97   1
  -5 -12  -9 732.605 656.187   1
  -5 -12  14 8586.40 1394.96  -2
  -5  12  -9 8586.40 1394.96   1
  -5 -12 -10 13041.8 819.576   1
  -5 -12  15 14028.0 1211.18  -2
  -5  12 -10 14028.0 1211.18   1
  -5  12 -11 3131.88 869.917   1
  -5 -12  16 7277.51 1212.14  -2
  -5  12 -11 7277.51 1212.14   1
  -5  12 -12 33478.6 1284.71   1
  -5 -12  17 33250.0 1211.75  -2
  -5  12 -12 33250.0 1211.75   1
  -5  12 -13 11029.2 850.484   1
  -5  12 -14 32036.6 903.989   1
  -5  12 -15 13071.7 628.859   1
   5  13 -19 4207.98 489.908   1
   5  13 -18 688.632 466.391   1
   5 -13 -17 8624.76 697.898   1
   5  13 -16 6453.70 749.065   1
   5 -13  10 13095.5 1044.87  -2
   5  13 -15 13095.5 1044.87   1
   5 -13   9 20986.2 1244.08  -2
   5  13 -14 20986.2 1244.08   1
   5 -13   8 17244.5 1132.75  -2
   5  13 -13 17244.5 1132.75   1
   5 -13   7 32806.3 1504.63  -2
   5  13 -12 32806.3 1504.63   1
   5 -13   6 24155.2 1418.16  -2
   5  13 -11 24155.2 1418.16   1
   5 -13   5 25787.7 1478.92  -2
   5  13 -10 25787.7 1478.92   1
   5 -13   4 45101.7 1652.79  -2
   5  13  -9 45101.7 1652.79   1
   5 -13   3 42377.7 4078.74  -2
   5  13  -8 42377.7 4078.74   1
   5 -13   2 23292.3 1417.12  -2
   5  13  -7 23292.3 1417.12   1
   5 -13   1 41140.2 1853.20  -2
   5  13  -6 41140.2 1853.20   1
  -5  13   0 23526.4 1462.85  -2
  -5 -13   5 23526.4 1462.85   1
   5 -13  -1 22628.9 1568.67  -2
   5  13  -4 22628.9 1568.67   1
   5 -13  -2 36593.0 2082.70  -2
   5  13  -3 36593.0 2082.70   1
  -5  13   3 22308.9 2030.09  -2
  -5 -13   2 22308.9 2030.09   1
  -5  13   4 38126.8 2000.70  -2
  -5 -13   1 38126.8 2000.70   1
  -5  13   5 31307.3 1929.50  -2
  -5 -13   0 31307.3 1929.50   1
  -5  13   6 32535.2 1885.73  -2
  -5 -13  -1 32535.2 1885.73   1
  -5  13   7 31970.8 2062.68  -2
  -5 -13  -2 31970.8 2062.68   1
  -5  13   8 20845.3 1748.67  -2
  -5 -13  -3 20845.3 1748.67   1
  -5  13   9 72717.1 2439.00  -2
  -5 -13  -4 72717.1 2439.00   1
  -5  13  10 27842.3 1650.59  -2
  -5 -13  -5 27842.3 1650.59   1
  -5  13  11 56561.3 2292.11  -2
  -5 -13  -6 56561.3 2292.11   1
  -5  13  12 42192.8 1698.43  -2
  -5 -13  -7 42192.8 1698.43   1
  -5  13  13 28380.0 1410.17  -2
  -5 -13  -8 28380.0 1410.17   1
  -5 -13  -9 26311.0 1079.02   1
  -5 -13  14 31543.8 1460.93  -2
  -5  13  -9 31543.8 1460.93   1
  -5 -13 -10 48.8068 528.035   1
  -5 -13  15 7009.19 1077.07  -2
  -5  13 -10 7009.19 1077.07   1
  -5  13 -11 7934.01 724.171   1
  -5 -13  16 10880.4 1557.98  -2
  -5  13 -11 10880.4 1557.98   1
  -5  13 -12 1891.44 657.563   1
  -5 -13  17 5876.07 853.900  -2
  -5  13 -12 5876.07 853.900   1
  -5  13 -13 8055.33 686.160   1
  -5  13 -14 9875.98 647.655   1
   5  14 -19 2242.57 508.452   1
   5  14 -18 16256.1 998.073   1
   5 -14 -17 45.7280 472.777   1
   5 -14 -16 4535.15 638.308   1
   5 -14  10 6843.02 854.018  -2
   5  14 -15 6843.02 854.018   1
   5 -14   9 1837.58 851.202  -2
   5  14 -14 1837.58 851.202   1
   5 -14   8 16379.2 1691.61  -2
   5  14 -13 16379.2 1691.61   1
   5 -14   7 16402.1 1174.56  -2
   5  14 -12 16402.1 1174.56   1
   5 -14   6 32549.5 1437.61  -2
   5  14 -11 32549.5 1437.61   1
   5 -14   5 44197.1 2228.30  -2
   5  14 -10 44197.1 2228.30   1
   5 -14   4 44729.0 2056.85  -2
   5  14  -9 44729.0 2056.85   1
   5 -14   3 42058.7 1649.36  -2
   5  14  -8 42058.7 1649.36   1
   5 -14   2 13109.7 1217.63  -2
   5  14  -7 13109.7 1217.63   1
   5 -14   1 87023.3 9149.93  -2
   5  14  -6 87023.3 9149.93   1
  -5  14   0 6218.04 1046.76  -2
  -5 -14   5 6218.04 1046.76   1
  -5  14   1 58198.0 1857.45  -2
  -5 -14   4 58198.0 1857.45   1
  -5  14   2 6394.28 1245.44  -2
  -5 -14   3 6394.28 1245.44   1
  -5  14   3 13131.9 1300.64  -2
  -5 -14   2 13131.9 1300.64   1
  -5  14   4 24241.1 1627.48  -2
  -5 -14   1 24241.1 1627.48   1
  -5  14   5 5222.82 1265.16  -2
  -5 -14   0 5222.82 1265.16   1
  -5  14   6 54076.5 2132.88  -2
  -5 -14  -1 54076.5 2132.88   1
  -5  14   7 5593.87 1384.85  -2
  -5 -14  -2 5593.87 1384.85   1
  -5  14   8 60946.2 2377.02  -2
  -5 -14  -3 60946.2 2377.02   1
  -5  14   9 22760.0 1666.10  -2
  -5 -14  -4 22760.0 1666.10   1
  -5  14  10 48117.7 1962.02  -2
  -5 -14  -5 48117.7 1962.02   1
  -5  14  11 27636.9 1579.11  -2
  -5 -14  -6 27636.9 1579.11   1
  -5  14  12 29070.4 1510.99  -2
  -5 -14  -7 29070.4 1510.99   1
  -5 -14  13 29473.1 1759.58  -2
  -5  14  -8 29473.1 1759.58   1
  -5 -14  -9 2446.79 628.933   1
  -5 -14  14 2053.46 1009.68  -2
  -5  14  -9 2053.46 1009.68   1
  -5 -14 -10 13638.0 773.593   1
  -5 -14  15 13626.1 1087.62  -2
  -5  14 -10 13626.1 1087.62   1
  -5 -14 -11 2322.00 472.147   1
  -5 -14  16 4063.44 865.397  -2
  -5  14 -11 4063.44 865.397   1
  -5  14 -12 10306.9 801.343   1
  -5  14 -13 3115.61 546.757   1
  -5  14 -14 7855.91 534.781   1
   5  15 -18 15037.5 602.031   1
   5 -15 -17 15605.5 654.396   1
   5 -15 -16 29984.0 935.548   1
   5 -15 -15 8799.45 768.771   1
   5 -15  10 20374.4 969.179  -2
   5  15 -15 20374.4 969.179   1
   5 -15   9 48871.1 1364.49  -2
   5  15 -14 48871.1 1364.49   1
   5 -15   8 21014.3 1120.92  -2
   5  15 -13 21014.3 1120.92   1
   5 -15   7 68254.9 8779.78  -2
   5  15 -12 68254.9 8779.78   1
   5 -15   6 15741.7 1094.98  -2
   5  15 -11 15741.7 1094.98   1
   5 -15   5 18361.3 1889.91  -2
   5  15 -10 18361.3 1889.91   1
   5 -15   4 25116.9 1296.15  -2
   5  15  -9 25116.9 1296.15   1
   5 -15   3 9649.99 1113.22  -2
   5  15  -8 9649.99 1113.22   1
   5 -15   2 31125.7 1561.43  -2
   5  15  -7 31125.7 1561.43   1
   5 -15   1 16511.3 1504.52  -2
   5  15  -6 16511.3 1504.52   1
  -5  15   0 70461.2 1910.50  -2
  -5 -15   5 70461.2 1910.50   1
  -5  15   1 49872.3 1765.93  -2
  -5 -15   4 49872.3 1765.93   1
  -5  15   2 59663.1 1943.87  -2
  -5 -15   3 59663.1 1943.87   1
  -5  15   3 76307.7 2137.73  -2
  -5 -15   2 76307.7 2137.73   1
  -5  15   4 43383.7 1879.21  -2
  -5 -15   1 43383.7 1879.21   1
  -5  15   5 108491. 3118.44  -2
  -5 -15   0 108491. 3118.44   1
  -5  15   6 22778.4 1625.67  -2
  -5 -15  -1 22778.4 1625.67   1
  -5  15   7 58694.0 2277.67  -2
  -5 -15  -2 58694.0 2277.67   1
  -5  15   8 5761.90 1262.21  -2
  -5 -15  -3 5761.90 1262.21   1
  -5  15   9 57328.0 2357.83  -2
  -5 -15  -4 57328.0 2357.83   1
  -5  15  10 12360.7 1306.10  -2
  -5 -15  -5 12360.7 1306.10   1
  -5  15  11 16303.8 1325.87  -2
  -5 -15  -6 16303.8 1325.87   1
  -5 -15  12 38750.2 1676.18  -2
  -5  15  -7 38750.2 1676.18   1
  -5 -15  13 13224.1 1102.12  -2
  -5  15  -8 13224.1 1102.12   1
  -5 -15  -9 4499.87 662.570   1
  -5 -15  14 28719.2 1282.44  -2
  -5  15  -9 28719.2 1282.44   1
  -5 -15 -10 20565.7 816.527   1
  -5 -15  15 26234.5 1182.12  -2
  -5  15 -10 26234.5 1182.12   1
  -5  15 -11 10073.7 744.443   1
  -5 -15  16 25643.7 1035.73  -2
  -5  15 -11 25643.7 1035.73   1
  -5  15 -12 32192.4 972.719   1
  -5  15 -13 7725.53 536.345   1
   5 -16 -17 390.842 325.796   1
   5 -16 -16 174.560 404.700   1
   5 -16 -15 527.220 489.599   1
   5 -16 -14 2642.44 634.925   1
   5 -16   9 6773.96 712.697  -2
   5  16 -14 6773.96 712.697   1
   5 -16   8 20765.0 997.788  -2
   5  16 -13 20765.0 997.788   1
   5 -16   7 23649.6 1094.39  -2
   5  16 -12 23649.6 1094.39   1
   5 -16   6 28393.3 1203.11  -2
   5  16 -11 28393.3 1203.11   1
   5 -16   5 67551.1 1702.48  -2
   5  16 -10 67551.1 1702.48   1
   5 -16   4 25968.4 1284.39  -2
   5  16  -9 25968.4 1284.39   1
   5 -16   3 96014.2 14292.7  -2
   5  16  -8 96014.2 14292.7   1
   5 -16   2 16326.0 1218.94  -2
   5  16  -7 16326.0 1218.94   1
   5 -16   1 75491.6 8936.35  -2
   5  16  -6 75491.6 8936.35   1
  -5  16   0 6509.75 1013.32  -2
  -5 -16   5 6509.75 1013.32   1
  -5  16   1 28790.1 1394.52  -2
  -5 -16   4 28790.1 1394.52   1
  -5  16   2 13276.0 1256.81  -2
  -5 -16   3 13276.0 1256.81   1
  -5  16   3 8734.44 1194.98  -2
  -5 -16   2 8734.44 1194.98   1
  -5  16   4 19608.7 1456.27  -2
  -5 -16   1 19608.7 1456.27   1
  -5  16   5 3753.73 1191.68  -2
  -5 -16   0 3753.73 1191.68   1
  -5  16   6 37505.9 1907.61  -2
  -5 -16  -1 37505.9 1907.61   1
  -5  16   7 23135.4 1502.14  -2
  -5 -16  -2 23135.4 1502.14   1
  -5  16   8 47098.8 1721.65  -2
  -5 -16  -3 47098.8 1721.65   1
   5  16   4 44796.4 1307.18   1
  -5  16   9 50227.8 1869.44  -2
  -5 -16  -4 50227.8 1869.44   1
  -5  16  10 41789.7 1644.57  -2
  -5 -16  -5 41789.7 1644.57   1
  -5  16  11 64475.8 1849.43  -2
  -5 -16  -6 64475.8 1849.43   1
  -5 -16  12 18445.4 1177.81  -2
  -5  16  -7 18445.4 1177.81   1
  -5 -16  13 46599.5 1470.15  -2
  -5  16  -8 46599.5 1470.15   1
  -5 -16  -9 10882.2 718.513   1
  -5 -16  14 12050.4 982.163  -2
  -5  16  -9 12050.4 982.163   1
  -5 -16 -10 16689.1 724.744   1
  -5 -16  15 15562.2 933.691  -2
  -5  16 -10 15562.2 933.691   1
  -5  16 -11 7247.57 553.031   1
  -5 -16  16 6253.40 714.315  -2
  -5  16 -11 6253.40 714.315   1
  -5  16 -12 4732.39 506.342   1
   5 -17 -16 31532.0 1327.04   1
   5 -17 -15 677.571 411.957   1
   5 -17 -14 35255.7 972.741   1
   5 -17   9 36033.2 926.620  -2
   5  17 -14 36033.2 926.620   1
   5 -17 -13 3735.42 671.557   1
   5 -17   8 6420.85 703.369  -2
   5  17 -13 6420.85 703.369   1
   5 -17   7 39082.5 1181.38  -2
   5  17 -12 39082.5 1181.38   1
   5 -17   6 9182.34 865.228  -2
   5  17 -11 9182.34 865.228   1
   5 -17   5 26518.1 1183.12  -2
   5  17 -10 26518.1 1183.12   1
   5 -17   4 18910.4 1121.91  -2
   5  17  -9 18910.4 1121.91   1
   5 -17   3 9560.03 1018.98  -2
   5  17  -8 9560.03 1018.98   1
   5 -17   2 30172.7 1375.91  -2
   5  17  -7 30172.7 1375.91   1
   5 -17   1 15838.4 1182.63  -2
   5  17  -6 15838.4 1182.63   1
   5 -17   0 35268.8 1536.56  -2
   5  17  -5 35268.8 1536.56   1
  -5  17   1 34048.7 1751.23  -2
  -5 -17   4 34048.7 1751.23   1
  -5  17   2 27157.5 1444.04  -2
  -5 -17   3 27157.5 1444.04   1
  -5  17   3 62633.7 2689.42  -2
  -5 -17   2 62633.7 2689.42   1
  -5  17   4 15565.2 1298.32  -2
  -5 -17   1 15565.2 1298.32   1
  -5  17   5 83060.2 2292.29  -2
  -5 -17   0 83060.2 2292.29   1
  -5  17   6 12844.7 1316.80  -2
  -5 -17  -1 12844.7 1316.80   1
  -5  17   7 62108.4 1889.66  -2
  -5 -17  -2 62108.4 1889.66   1
  -5  17   8 6272.15 1102.56  -2
  -5 -17  -3 6272.15 1102.56   1
   5  17   4 24901.1 996.826   1
  -5  17   9 30731.9 1482.76  -2
  -5 -17  -4 30731.9 1482.76   1
  -5  17  10 15852.6 1198.70  -2
  -5 -17  -5 15852.6 1198.70   1
  -5 -17  11 4698.39 1032.66  -2
  -5  17  -6 4698.39 1032.66   1
  -5 -17  12 25986.1 1192.02  -2
  -5  17  -7 25986.1 1192.02   1
  -5 -17  -8 7139.31 692.515   1
  -5 -17  13 7448.41 912.893  -2
  -5  17  -8 7448.41 912.893   1
  -5 -17  -9 5133.75 584.128   1
  -5 -17  14 25135.8 1066.19  -2
  -5  17  -9 25135.8 1066.19   1
  -5 -17 -10 25383.8 757.388   1
  -5 -17  15 25127.8 970.280  -2
  -5  17 -10 25127.8 970.280   1
  -5  17 -11 3506.27 499.993   1
  -5 -17  16 19157.8 815.511  -2
  -5  17 -11 19157.8 815.511   1
   5 -18 -15 3327.55 378.278   1
   5 -18 -14 1249.00 415.033   1
   5  18   8 14956.1 812.459  -2
   5 -18 -13 14956.1 812.459   1
   5  18   7 10130.4 825.764  -2
   5 -18 -12 10130.4 825.764   1
   5  18   6 15506.3 964.320  -2
   5 -18 -11 15506.3 964.320   1
   5 -18   5 20224.0 1005.48  -2
   5  18 -10 20224.0 1005.48   1
   5 -18   4 14135.2 982.986  -2
   5  18  -9 14135.2 982.986   1
   5 -18   3 57330.8 1555.77  -2
   5  18  -8 57330.8 1555.77   1
   5 -18   2 732.532 813.257  -2
   5  18  -7 732.532 813.257   1
   5 -18   1 44586.1 2110.62  -2
   5  18  -6 44586.1 2110.62   1
   5 -18   0 7350.09 1401.85  -2
   5  18  -5 7350.09 1401.85   1
  -5  18   1 10398.2 1185.04  -2
  -5 -18   4 10398.2 1185.04   1
   5  18  -2 21228.0 1336.16  -2
   5 -18  -3 21228.0 1336.16   1
  -5  18   3 10074.9 1083.06  -2
  -5 -18   2 10074.9 1083.06   1
  -5  18   4 22288.3 1316.79  -2
  -5 -18   1 22288.3 1316.79   1
  -5  18   5 3575.15 960.266  -2
  -5 -18   0 3575.15 960.266   1
  -5  18   6 44312.0 1586.90  -2
  -5 -18  -1 44312.0 1586.90   1
  -5 -18   7 1830.19 894.005  -2
  -5  18  -2 1830.19 894.005   1
  -5 -18   8 47495.0 1487.94  -2
  -5  18  -3 47495.0 1487.94   1
   5  18   4 16094.8 789.356   1
  -5 -18   9 19513.3 1189.91  -2
  -5  18  -4 19513.3 1189.91   1
   5  18   5 5378.22 576.467   1
  -5 -18  10 15723.5 1074.38  -2
  -5  18  -5 15723.5 1074.38   1
  -5 -18  11 17848.4 1052.13  -2
  -5  18  -6 17848.4 1052.13   1
  -5 -18  12 8005.54 844.877  -2
  -5  18  -7 8005.54 844.877   1
  -5 -18  -8 21041.2 828.368   1
  -5 -18  13 24037.2 1606.24  -2
  -5  18  -8 24037.2 1606.24   1
  -5 -18  -9 10198.8 588.409   1
  -5 -18  14 10018.0 981.393  -2
  -5  18  -9 10018.0 981.393   1
  -5 -18 -10 5238.34 829.633   1
  -5 -18  15 8494.75 662.800  -2
  -5  18 -10 8494.75 662.800   1
   5 -19 -13 917.012 550.919   1
   5  19   7 19131.9 825.310  -2
   5 -19 -12 19131.9 825.310   1
   5  19   6 3907.96 706.132  -2
   5 -19 -11 3907.96 706.132   1
   5  19   5 19664.9 974.927  -2
   5 -19 -10 19664.9 974.927   1
   5  19   4 21624.0 3242.79  -2
   5 -19  -9 21624.0 3242.79   1
   5  19   3 6270.28 882.507  -2
   5 -19  -8 6270.28 882.507   1
   5  19   2 27912.0 1424.80  -2
   5 -19  -7 27912.0 1424.80   1
   5  19   1 1136.37 853.024  -2
   5 -19  -6 1136.37 853.024   1
   5  19   0 12124.5 1077.36  -2
   5 -19  -5 12124.5 1077.36   1
   5  19  -1 6491.04 917.727  -2
   5 -19  -4 6491.04 917.727   1
  -5  19   2 3199.26 836.115  -2
  -5 -19   3 3199.26 836.115   1
  -5  19   3 5834.25 900.418  -2
  -5 -19   2 5834.25 900.418   1
  -5  19   4 3616.94 891.333  -2
  -5 -19   1 3616.94 891.333   1
  -5  19   5 8990.55 1153.82  -2
  -5 -19   0 8990.55 1153.82   1
  -5  19   6 3074.61 848.005  -2
  -5 -19  -1 3074.61 848.005   1
  -5  19   7 17740.7 1386.09  -2
  -5 -19  -2 17740.7 1386.09   1
  -5 -19   8 7046.31 837.641  -2
  -5  19  -3 7046.31 837.641   1
   5  19   4 4644.28 558.675   1
  -5 -19   9 14605.6 1032.33  -2
  -5  19  -4 14605.6 1032.33   1
   5  19   5 34041.1 877.894   1
  -5 -19  10 35957.2 1234.15  -2
  -5  19  -5 35957.2 1234.15   1
  -5 -19  11 2997.27 696.189  -2
  -5  19  -6 2997.27 696.189   1
  -5 -19  12 28843.6 978.508  -2
  -5  19  -7 28843.6 978.508   1
  -5 -19  -8 305.277 418.408   1
  -5 -19  13 695.332 571.722  -2
  -5  19  -8 695.332 571.722   1
  -5  19  -9 14361.6 1023.90   1
   5  20 -12 223.359 325.868   1
   5  20   7 3249.65 597.312  -2
   5 -20 -12 3249.65 597.312   1
   5  20   6 8589.49 825.280  -2
   5 -20 -11 8589.49 825.280   1
   5  20   5 4027.69 642.339  -2
   5 -20 -10 4027.69 642.339   1
   5  20   4 5909.74 725.792  -2
   5 -20  -9 5909.74 725.792   1
   5  20   3 13709.2 887.799  -2
   5 -20  -8 13709.2 887.799   1
   5  20   2 5709.31 810.450  -2
   5 -20  -7 5709.31 810.450   1
   5  20   1 14556.9 1633.78  -2
   5 -20  -6 14556.9 1633.78   1
   5  20   0 16876.0 1046.71  -2
   5 -20  -5 16876.0 1046.71   1
   5  20  -1 9873.98 2134.61  -2
   5 -20  -4 9873.98 2134.61   1
  -5  20   2 18022.7 936.320  -2
  -5 -20   3 18022.7 936.320   1
  -5 -20   3 8100.82 1010.72  -2
  -5  20   2 8100.82 1010.72   1
  -5  20   4 18867.3 1101.12  -2
  -5 -20   1 18867.3 1101.12   1
  -5  20   5 11475.6 996.984  -2
  -5 -20   0 11475.6 996.984   1
  -5  20   6 28547.1 1112.83  -2
  -5 -20  -1 28547.1 1112.83   1
  -5  20   7 11692.3 837.096  -2
  -5 -20  -2 11692.3 837.096   1
  -5  20   8 22692.3 903.468  -2
  -5 -20  -3 22692.3 903.468   1
   5  20   4 7182.74 531.678   1
  -5  20   9 8097.15 777.519  -2
  -5 -20  -4 8097.15 777.519   1
  -5 -20  10 3560.08 621.591  -2
  -5  20  -5 3560.08 621.591   1
  -5 -20  11 6154.23 627.195  -2
  -5  20  -6 6154.23 627.195   1
  -5 -20  -7 6355.68 504.988   1
  -5 -20  12 5841.60 549.652  -2
  -5  20  -7 5841.60 549.652   1
   5  21   5 6641.44 557.410  -2
   5 -21 -10 6641.44 557.410   1
   5  21   4 11553.8 689.104  -2
   5 -21  -9 11553.8 689.104   1
   5  21   3 7752.22 681.680  -2
   5 -21  -8 7752.22 681.680   1
   5  21   2 6738.59 1032.07  -2
   5 -21  -7 6738.59 1032.07   1
   5  21   1 13685.3 851.231  -2
   5 -21  -6 13685.3 851.231   1
   5  21   0 3480.74 730.284  -2
   5 -21  -5 3480.74 730.284   1
   5 -21  -1 10373.2 818.732  -2
   5  21  -4 10373.2 818.732   1
  -5  21   2 3148.73 597.243  -2
  -5 -21   3 3148.73 597.243   1
  -5  21   3 7816.83 700.297  -2
  -5 -21   2 7816.83 700.297   1
  -5  21   4 7216.26 1355.86  -2
  -5 -21   1 7216.26 1355.86   1
  -5  21   5 6088.24 671.256  -2
  -5 -21   0 6088.24 671.256   1
  -5  21   6 9791.75 703.289  -2
  -5 -21  -1 9791.75 703.289   1
  -5  21   7 4635.34 627.805  -2
  -5 -21  -2 4635.34 627.805   1
   5  21   3 10014.0 555.356   1
  -5  21   8 11411.7 705.355  -2
  -5 -21  -3 11411.7 705.355   1
   5  21   4 1697.89 375.349   1
  -5  21   9 6529.00 612.187  -2
  -5 -21  -4 6529.00 612.187   1
  -5  21  10 13165.9 1931.03  -2
  -5 -21  -5 13165.9 1931.03   1
   5  22   2 27010.3 3117.14  -2
   5 -22  -7 27010.3 3117.14   1
   5 -22   1 29577.1 892.264  -2
   5  22  -6 29577.1 892.264   1
   5 -22   0 17562.6 778.295  -2
   5  22  -5 17562.6 778.295   1
   5 -22  -1 6525.36 648.267  -2
   5  22  -4 6525.36 648.267   1
   5 -22  -2 14574.3 762.143  -2
   5  22  -3 14574.3 762.143   1
  -5  22   3 5749.32 2224.60  -2
  -5 -22   2 5749.32 2224.60   1
  -5  22   4 10692.4 614.215  -2
  -5 -22   1 10692.4 614.215   1
  -5  22   5 14744.1 653.532  -2
  -5 -22   0 14744.1 653.532   1
  -5  22   6 14934.3 1040.98  -2
  -5 -22  -1 14934.3 1040.98   1
   5  22   2 10816.4 508.779   1
  -5  22   7 22621.9 704.886  -2
  -5 -22  -2 22621.9 704.886   1
   6   0 -22 2056.27 502.088   1
   6   0 -21 343.790 652.814   1
   6   0 -20 17474.3 1262.47   1
   6   0 -19-13.6859 743.527   1
   6   0 -18 87165.8 2131.07   1
   6   0 -17 417.702 862.185   1
   6   0 -16 114914. 2648.82   1
   6   0 -15 653.884 763.496   1
   6   0   9-133.839 1697.77  -2
   6   0 -15-133.839 1697.77   1
   6   0 -14 181406. 2942.10   1
   6   0   8 223335. 4036.24  -2
   6   0 -14 223335. 4036.24   1
   6   0 -13-129.328 769.686   1
   6   0   7-141.629 1610.04  -2
   6   0 -13-141.629 1610.04   1
   6   0 -12 141375. 4474.08   1
   6   0   6 140630. 5282.88  -2
   6   0 -12 140630. 5282.88   1
   6   0 -11 940.259 693.641   1
   6   0   5-494.001 1357.33  -2
   6   0 -11-494.001 1357.33   1
   6   0   4 143620. 5199.78  -2
   6   0 -10 143620. 5199.78   1
   6   0   3 1092.92 2631.79  -2
   6   0  -9 1092.92 2631.79   1
   6   0   2 141799. 3703.93  -2
   6   0  -8 141799. 3703.93   1
  -6   0  -1 1690.91 1460.33  -2
  -6   0   7 1690.91 1460.33   1
   6   0   0 200951. 3882.17  -2
   6   0  -6 200951. 3882.17   1
   6   0  -1 2506.32 1156.98  -2
   6   0  -5 2506.32 1156.98   1
   6   0  -4 172822. 3298.49   1
   6   0  -2 275161. 5024.12  -2
   6   0  -4 275161. 5024.12   1
   6   0  -3 431.371 1325.39  -2
   6   0  -3 431.371 1325.39   1
   6   0  -4 322191. 5764.48  -2
   6   0  -2 322191. 5764.48   1
   6   0  -5 179.169 773.602  -2
   6   0  -1 179.169 773.602   1
   6   0  -6 284940. 5781.70  -2
   6   0   0 284940. 5781.70   1
   6   0  -7 3167.93 1363.10  -2
   6   0   1 3167.93 1363.10   1
   6   0  -8 273772. 5258.44  -2
   6   0   2 273772. 5258.44   1
   6   0  -9-756.055 1276.08  -2
   6   0   3-756.055 1276.08   1
   6   0 -10 117559. 3833.45  -2
   6   0   4 117559. 3833.45   1
   6   0 -11 2363.93 1829.26  -2
   6   0   5 2363.93 1829.26   1
  -6   0  -6 9642.18 1005.56   1
   6   0 -12 78250.7 3303.42  -2
   6   0   6 78250.7 3303.42   1
  -6   0  -7 355.028 1208.57   1
  -6   0  13 2156.34 1446.59  -2
  -6   0  -7 2156.34 1446.59   1
  -6   0  14 139872. 3777.76  -2
  -6   0  -8 139872. 3777.76   1
  -6   0  -9 392.840 1091.38   1
  -6   0 -10 103248. 10537.9   1
  -6   0 -11-117.842 1089.10   1
  -6   0 -12 125523. 8223.88   1
  -6   0 -13-253.933 890.329   1
  -6   0 -14 71552.1 1768.41   1
  -6   0 -15-262.038 624.516   1
  -6   0 -16 30556.5 1025.25   1
  -6   0 -17 40.0933 400.542   1
   6   1 -22 29767.0 4153.73   1
   6  -1 -21 3996.14 561.633   1
   6  -1 -20 68038.8 1506.45   1
   6  -1 -19 1908.14 759.857   1
   6  -1 -18 25830.7 1463.87   1
   6  -1 -17-63.3238 816.236   1
   6   1 -16 2422.93 943.496   1
   6   1  10 45184.1 2113.82  -2
   6  -1 -16 45184.1 2113.82   1
  -6   1  15 268.272 758.513   1
   6   1   9 3161.93 1653.39  -2
   6  -1 -15 3161.93 1653.39   1
   6  -1 -14 1684.77 891.201   1
   6   1   8 80461.0 2349.57  -2
   6  -1 -14 80461.0 2349.57   1
   6  -1 -13 837.134 785.592   1
   6   1   7 4021.74 1407.91  -2
   6  -1 -13 4021.74 1407.91   1
   6  -1 -12 54250.5 2280.35   1
   6   1   6 133897. 2727.35  -2
   6  -1 -12 133897. 2727.35   1
   6  -1 -11 2276.24 853.291   1
   6   1   5 4365.31 1334.19  -2
   6  -1 -11 4365.31 1334.19   1
   6   1   4 152098. 4818.70  -2
   6  -1 -10 152098. 4818.70   1
   6  -1  -9 10568.4 1597.30   1
   6  -1   3 15972.7 1755.70  -2
   6   1  -9 15972.7 1755.70   1
   6   1   2 236872. 4398.16  -2
   6  -1  -8 236872. 4398.16   1
   6   1   1 3865.41 1673.16  -2
   6  -1  -7 3865.41 1673.16   1
   6   1   0 143794. 4205.96  -2
   6  -1  -6 143794. 4205.96   1
  -6  -1   1 1823.79 1062.65  -2
  -6   1   5 1823.79 1062.65   1
   6   1  -4 73130.6 2213.01   1
   6   1  -2 75366.1 2346.14  -2
   6  -1  -4 75366.1 2346.14   1
   6   1  -3 430.794 609.995   1
   6   1  -3 866.716 1258.53  -2
   6  -1  -3 866.716 1258.53   1
   6   1  -2 18221.0 1467.09   1
   6   1  -4 47489.9 2526.86  -2
   6  -1  -2 47489.9 2526.86   1
   6   1  -5 4743.73 2197.39  -2
   6  -1  -1 4743.73 2197.39   1
   6   1  -6 76394.2 2959.63  -2
   6  -1   0 76394.2 2959.63   1
   6   1  -7 1684.52 1356.52  -2
   6  -1   1 1684.52 1356.52   1
   6   1  -8 129704. 4070.35  -2
   6  -1   2 129704. 4070.35   1
   6   1  -9 19990.2 3445.71  -2
   6  -1   3 19990.2 3445.71   1
   6  -1 -10 145819. 4092.07  -2
   6   1   4 145819. 4092.07   1
  -6  -1  11 4898.15 1730.70  -2
  -6   1  -5 4898.15 1730.70   1
  -6   1  -6 156937. 2668.06   1
  -6  -1  12 185863. 12554.0  -2
  -6   1  -6 185863. 12554.0   1
   6   1   7 8451.40 1439.56   1
  -6  -1  13 5398.16 2122.80  -2
  -6   1  -7 5398.16 2122.80   1
  -6   1  -8 166235. 3210.96   1
  -6  -1  14 166283. 3337.18  -2
  -6   1  -8 166283. 3337.18   1
  -6   1  -9 4136.50 942.952   1
  -6  -1  15 2501.82 1905.82  -2
  -6   1  -9 2501.82 1905.82   1
  -6  -1 -10 81862.0 2150.15   1
  -6  -1 -11 601.267 1107.09   1
  -6  -1 -12 32728.0 1665.69   1
  -6  -1 -13 118.733 908.530   1
  -6  -1 -14 1340.58 812.093   1
  -6  -1 -15 5428.27 745.135   1
  -6  -1 -16 5136.04 663.313   1
  -6  -1 -17 1813.45 426.316   1
   6   2 -22 613.356 404.173   1
   6  -2 -21 163.233 526.466   1
   6  -2 -20 4351.47 682.370   1
   6  -2 -19 900.559 705.903   1
   6  -2 -18 32204.6 1391.26   1
   6  -2 -17 977.554 831.610   1
   6   2 -16 68569.6 2006.06   1
   6   2  10 91062.7 2412.31  -2
   6  -2 -16 91062.7 2412.31   1
  -6   2  15 2443.07 796.227   1
   6   2   9 4157.32 2234.64  -2
   6  -2 -15 4157.32 2234.64   1
   6  -2 -14 83074.6 2050.55   1
   6   2   8 97422.1 2574.93  -2
   6  -2 -14 97422.1 2574.93   1
   6   2 -13 12157.8 1040.78   1
   6   2   7 12672.1 1522.75  -2
   6  -2 -13 12672.1 1522.75   1
   6   2 -12 43767.8 1923.06   1
   6   2   6 41770.9 3065.52  -2
   6  -2 -12 41770.9 3065.52   1
   6  -2 -11 18372.6 2035.04   1
   6   2   5 28324.5 1609.45  -2
   6  -2 -11 28324.5 1609.45   1
  -6   2  10 17227.3 1195.84   1
   6  -2   4 31642.6 2261.22  -2
   6   2 -10 31642.6 2261.22   1
   6   2   3 1931.62 1454.93  -2
   6  -2  -9 1931.62 1454.93   1
   6   2   2 51806.4 3202.48  -2
   6  -2  -8 51806.4 3202.48   1
   6   2   1 31644.9 1714.57  -2
   6  -2  -7 31644.9 1714.57   1
   6   2   0 68710.6 2992.20  -2
   6  -2  -6 68710.6 2992.20   1
   6   2  -1 18466.4 1640.18  -2
   6  -2  -5 18466.4 1640.18   1
   6   2  -4 84225.1 2448.03   1
   6   2  -2 146462. 4129.55  -2
   6  -2  -4 146462. 4129.55   1
   6   2  -3 7404.50 988.678   1
   6   2  -3 12008.9 1411.16  -2
   6  -2  -3 12008.9 1411.16   1
   6   2  -2 155115. 3472.40   1
   6   2  -4 176543. 7468.43  -2
   6  -2  -2 176543. 7468.43   1
   6   2  -1 34218.5 1840.29   1
   6   2  -5 34615.6 2827.44  -2
   6  -2  -1 34615.6 2827.44   1
   6   2   0 110095. 3129.84   1
   6   2  -6 110263. 8111.64  -2
   6  -2   0 110263. 8111.64   1
   6   2   1 53252.6 2338.35   1
   6   2  -7 52371.4 3244.62  -2
   6  -2   1 52371.4 3244.62   1
   6   2   2 98750.8 3205.14   1
   6   2  -8 96730.5 3473.33  -2
   6  -2   2 96730.5 3473.33   1
   6   2   3 1629.45 1067.05   1
   6   2  -9 2050.08 1543.98  -2
   6  -2   3 2050.08 1543.98   1
   6   2   4 34064.6 2148.20   1
   6   2 -10 36442.4 2786.76  -2
   6  -2   4 36442.4 2786.76   1
   6   2   5 11782.1 1656.33   1
  -6  -2  11 21722.5 1795.06  -2
  -6   2  -5 21722.5 1795.06   1
  -6   2  -6 1714.32 1127.54   1
  -6  -2  12 22671.0 1990.39  -2
  -6   2  -6 22671.0 1990.39   1
   6   2   7 3040.91 1263.97   1
  -6  -2  13 8810.92 1777.86  -2
  -6   2  -7 8810.92 1777.86   1
  -6  -2  -8 20347.1 1537.18   1
  -6  -2  14 57675.2 2670.32  -2
  -6   2  -8 57675.2 2670.32   1
  -6   2  -9 8486.34 1302.54   1
  -6  -2 -10 46054.7 2685.67   1
  -6  -2  16 78353.6 2269.88  -2
  -6   2 -10 78353.6 2269.88   1
  -6   2 -11 7555.01 1270.06   1
  -6  -2 -12 46701.2 1861.16   1
  -6  -2 -13 27157.0 1382.51   1
  -6  -2 -14 25275.4 1195.71   1
  -6  -2 -15 985.933 652.127   1
  -6  -2 -16 18067.8 827.439   1
  -6   2 -17 466.437 440.005   1
  -6   3  22 1581.49 419.936   1
   6   3 -21 2447.36 574.299   1
   6  -3 -20 1082.54 648.746   1
   6  -3 -19 1251.52 726.845   1
   6  -3 -18 8031.75 1138.56   1
   6  -3 -17 4272.40 863.418   1
   6   3 -16 755.351 796.153   1
   6   3  10 9056.11 1250.37  -2
   6  -3 -16 9056.11 1250.37   1
  -6   3  15 3977.44 854.551   1
   6   3   9 3463.95 1499.87  -2
   6  -3 -15 3463.95 1499.87   1
   6   3 -14 1395.84 825.669   1
   6   3   8 13501.2 1492.73  -2
   6  -3 -14 13501.2 1492.73   1
   6   3 -13 3930.78 847.384   1
   6   3   7 6101.87 1289.73  -2
   6  -3 -13 6101.87 1289.73   1
   6  -3 -12 51445.4 1853.68   1
   6   3   6 62371.9 2271.79  -2
   6  -3 -12 62371.9 2271.79   1
   6  -3 -11 7865.36 1384.16   1
   6   3   5 8312.83 1299.38  -2
   6  -3 -11 8312.83 1299.38   1
   6  -3 -10 1878.09 896.670   1
   6  -3   4 3744.06 1196.98  -2
   6   3 -10 3744.06 1196.98   1
   6   3  -9 23988.2 1832.74   1
  -6   3  -3 31502.7 2324.85  -2
  -6  -3   9 31502.7 2324.85   1
  -6   3   8 5319.35 1025.58   1
   6   3   2 5376.38 1658.57  -2
   6  -3  -8 5376.38 1658.57   1
   6   3   1 8748.20 1808.33  -2
   6  -3  -7 8748.20 1808.33   1
   6   3   0 19542.2 1816.86  -2
   6  -3  -6 19542.2 1816.86   1
   6   3  -1 3203.00 1392.70  -2
   6  -3  -5 3203.00 1392.70   1
   6   3  -4 10013.2 1098.78   1
   6   3  -2 10206.8 1620.88  -2
   6  -3  -4 10206.8 1620.88   1
   6   3  -3-255.365 720.774   1
   6   3  -3 266.598 1058.70  -2
   6  -3  -3 266.598 1058.70   1
   6   3  -2 9722.76 1209.26   1
   6   3  -4 10536.4 1311.11  -2
   6  -3  -2 10536.4 1311.11   1
   6   3  -1 1860.40 828.925   1
   6   3  -5 3576.90 1865.86  -2
   6  -3  -1 3576.90 1865.86   1
   6   3   0 506.071 870.497   1
   6   3  -6 12400.3 2715.61  -2
   6  -3   0 12400.3 2715.61   1
   6   3   1 9574.29 1292.84   1
   6   3  -7 15089.6 1992.03  -2
   6  -3   1 15089.6 1992.03   1
   6   3   2 339.609 911.517   1
   6   3  -8 2352.73 1743.18  -2
   6  -3   2 2352.73 1743.18   1
   6   3   3 22419.2 1781.54   1
   6   3  -9 31564.6 2590.89  -2
   6  -3   3 31564.6 2590.89   1
   6   3   4 2487.41 1098.99   1
  -6  -3  10 4258.76 1447.31  -2
  -6   3  -4 4258.76 1447.31   1
   6   3   5 2539.09 846.497   1
  -6  -3  11 8411.22 1566.16  -2
  -6   3  -5 8411.22 1566.16   1
  -6   3  -6 32399.8 1674.92   1
   6   3 -12 52805.2 3410.36  -2
   6  -3   6 52805.2 3410.36   1
  -6   3  -7 5222.72 1138.26   1
  -6  -3  13 5049.77 1364.63  -2
  -6   3  -7 5049.77 1364.63   1
  -6  -3  -8 20298.4 1626.67   1
  -6   3  -9 1322.80 1136.54   1
  -6  -3  15 2636.79 2515.41  -2
  -6   3  -9 2636.79 2515.41   1
  -6   3 -10 16396.1 1605.01   1
  -6  -3  16 15503.8 1511.24  -2
  -6   3 -10 15503.8 1511.24   1
  -6  -3 -11 4506.74 1179.02   1
  -6   3 -12 7633.76 1134.91   1
  -6  -3 -13 207.120 847.653   1
  -6  -3 -14 4661.61 853.985   1
  -6  -3 -15 11922.0 834.543   1
  -6  -3 -16 95.1993 473.160   1
   6   4 -22 3132.23 435.675   1
   6   4 -21 334.101 520.513   1
   6   4 -20 277.494 631.917   1
   6  -4 -19 3834.60 747.178   1
   6  -4 -18 367.028 754.290   1
   6  -4 -17 1717.69 735.457   1
   6  -4 -16 3804.42 850.491   1
  -6   4  15 5859.00 864.922   1
   6   4   9 5090.52 1648.09  -2
   6  -4 -15 5090.52 1648.09   1
   6   4 -14 162.365 804.147   1
   6   4   8 1487.22 1172.69  -2
   6  -4 -14 1487.22 1172.69   1
   6   4 -13 1312.18 844.749   1
   6   4   7 8014.24 1235.16  -2
   6  -4 -13 8014.24 1235.16   1
   6   4 -12 7715.18 1079.63   1
   6   4   6 8920.85 1594.04  -2
   6  -4 -12 8920.85 1594.04   1
   6   4 -11 1432.44 1716.84   1
   6   4   5 2005.38 1154.30  -2
   6  -4 -11 2005.38 1154.30   1
   6  -4 -10 7592.36 1016.59   1
   6   4   4 9401.85 1355.39  -2
   6  -4 -10 9401.85 1355.39   1
  -6   4   9 3386.89 973.760   1
   6   4   3 5701.84 1700.41  -2
   6  -4  -9 5701.84 1700.41   1
  -6   4   8-606.316 870.615   1
   6  -4   2-57.6162 1504.59  -2
   6   4  -8-57.6162 1504.59   1
   6   4   1 9442.86 1721.26  -2
   6  -4  -7 9442.86 1721.26   1
   6   4   0 2645.15 1417.05  -2
   6  -4  -6 2645.15 1417.05   1
   6   4  -1 1282.30 1312.90  -2
   6  -4  -5 1282.30 1312.90   1
   6   4  -4 1931.59 840.694   1
   6   4  -2 2132.57 1267.02  -2
   6  -4  -4 2132.57 1267.02   1
   6   4  -3-547.117 866.009   1
   6   4  -3 863.650 1183.88  -2
   6  -4  -3 863.650 1183.88   1
   6   4  -2-417.164 885.446   1
   6   4  -4 1254.71 1146.88  -2
   6  -4  -2 1254.71 1146.88   1
   6   4  -1-321.928 779.740   1
   6   4  -5 1361.82 1015.18  -2
   6  -4  -1 1361.82 1015.18   1
   6   4   0 2653.95 987.260   1
   6   4  -6 4108.10 1536.57  -2
   6  -4   0 4108.10 1536.57   1
   6   4   1 3771.10 1080.71   1
   6   4  -7 6231.33 1858.49  -2
   6  -4   1 6231.33 1858.49   1
   6   4   2 363.257 924.111   1
   6   4  -8 1842.13 1708.39  -2
   6  -4   2 1842.13 1708.39   1
   6   4   3 7185.03 1304.56   1
   6   4  -9 10958.8 2136.91  -2
   6  -4   3 10958.8 2136.91   1
   6   4   4 1895.96 1148.76   1
  -6  -4  10 5295.08 1028.53  -2
  -6   4  -4 5295.08 1028.53   1
   6   4   5-1550.01 1221.12   1
  -6  -4  11 1570.22 1152.39  -2
  -6   4  -5 1570.22 1152.39   1
  -6   4  -6 4446.95 958.269   1
  -6  -4  12 8566.33 1583.24  -2
  -6   4  -6 8566.33 1583.24   1
  -6   4  -7 10780.4 1235.32   1
  -6  -4  13 11042.7 1694.31  -2
  -6   4  -7 11042.7 1694.31   1
  -6   4  -8 2065.02 1016.93   1
  -6  -4  14 3949.36 2150.65  -2
  -6   4  -8 3949.36 2150.65   1
  -6  -4  -9 1547.24 1249.53   1
  -6  -4  15 4253.76 2517.38  -2
  -6   4  -9 4253.76 2517.38   1
  -6   4 -10 5319.42 1179.74   1
  -6  -4  16 8477.42 1422.00  -2
  -6   4 -10 8477.42 1422.00   1
  -6  -4 -11 5308.33 1143.61   1
  -6  -4 -12 3161.92 985.985   1
  -6  -4 -13 2985.50 931.962   1
  -6  -4 -14 2084.71 762.255   1
  -6  -4 -15 1305.48 606.348   1
  -6   4 -16 18.5274 475.328   1
   6   5 -22 4077.87 414.047   1
   6   5 -21 10768.0 669.912   1
   6   5 -20 19050.6 933.762   1
   6   5 -19 1953.32 719.845   1
   6  -5 -18 7861.85 876.439   1
   6  -5 -17 212.884 751.755   1
   6  -5 -16 1350.07 838.863   1
  -6   5  15 948.820 725.629   1
   6   5   9 9573.40 1370.53  -2
   6  -5 -15 9573.40 1370.53   1
   6   5 -14 1007.91 841.187   1
   6   5   8 4348.29 1160.98  -2
   6  -5 -14 4348.29 1160.98   1
   6   5 -13 612.577 875.232   1
   6   5   7 12609.7 1647.57  -2
   6  -5 -13 12609.7 1647.57   1
   6   5 -12 4975.19 986.568   1
   6   5   6 27292.1 1379.07  -2
   6  -5 -12 27292.1 1379.07   1
   6  -5 -11 5895.76 1667.76   1
   6   5   5 21345.4 1347.12  -2
   6  -5 -11 21345.4 1347.12   1
  -6   5  10 5366.86 1301.90   1
   6  -5   4 12616.8 1478.43  -2
   6   5 -10 12616.8 1478.43   1
  -6   5   9 37866.7 4867.08   1
   6  -5   3 42706.7 2558.98  -2
   6   5  -9 42706.7 2558.98   1
   6   5   2 32890.2 2394.40  -2
   6  -5  -8 32890.2 2394.40   1
   6   5   1 42515.8 2381.63  -2
   6  -5  -7 42515.8 2381.63   1
   6   5   0 22390.7 2063.34  -2
   6  -5  -6 22390.7 2063.34   1
   6   5  -1 10498.6 1450.46  -2
   6  -5  -5 10498.6 1450.46   1
   6   5  -4 10208.9 1189.64   1
   6   5  -2 10754.7 1528.12  -2
   6  -5  -4 10754.7 1528.12   1
   6   5  -3 19084.0 1570.51   1
   6   5  -3 28201.1 1980.16  -2
   6  -5  -3 28201.1 1980.16   1
   6   5  -2 6241.06 1073.42   1
   6   5  -4 9035.93 1434.26  -2
   6  -5  -2 9035.93 1434.26   1
   6   5  -1 7177.25 1180.02   1
   6   5  -5 9784.82 2195.52  -2
   6  -5  -1 9784.82 2195.52   1
  -6  -5   0 3933.86 769.326   1
   6   5  -6 14350.6 1987.71  -2
   6  -5   0 14350.6 1987.71   1
   6   5   1 955.402 1018.59   1
   6   5  -7 22681.9 2271.26  -2
   6  -5   1 22681.9 2271.26   1
   6   5   2 8988.95 1391.83   1
   6   5  -8 23905.0 2618.25  -2
   6  -5   2 23905.0 2618.25   1
   6   5   3 14402.8 1610.91   1
  -6  -5   9 33895.3 1708.76  -2
  -6   5  -3 33895.3 1708.76   1
   6   5   4 15022.0 1685.53   1
  -6  -5  10 17607.0 1404.56  -2
  -6   5  -4 17607.0 1404.56   1
   6   5   5 31177.5 2231.78   1
  -6  -5  11 32598.0 1997.37  -2
  -6   5  -5 32598.0 1997.37   1
  -6   5  -6 47202.4 1872.79   1
  -6  -5  12 50897.1 2027.51  -2
  -6   5  -6 50897.1 2027.51   1
  -6  -5  -7 25499.6 1330.15   1
  -6  -5  13 24871.0 3287.24  -2
  -6   5  -7 24871.0 3287.24   1
  -6  -5  -8 11369.2 1016.70   1
  -6  -5  14 13327.2 1948.43  -2
  -6   5  -8 13327.2 1948.43   1
  -6  -5  -9 17295.5 2192.56   1
  -6  -5  15 18898.7 1819.16  -2
  -6   5  -9 18898.7 1819.16   1
  -6   5 -10 514.144 916.948   1
  -6  -5  16 2747.15 1911.77  -2
  -6   5 -10 2747.15 1911.77   1
  -6   5 -11 6009.12 1314.92   1
  -6  -5 -12 10323.1 1251.64   1
  -6  -5 -13-248.123 830.955   1
  -6   5 -14 5084.36 856.619   1
  -6   5 -15 1351.82 647.951   1
  -6   5 -16 3256.80 533.725   1
   6   6 -21 1082.30 461.573   1
  -6   6  20 219.576 522.992   1
   6   6 -19 22880.9 1074.95   1
   6   6 -18 904.578 735.286   1
   6   6 -17 36403.3 1486.77   1
   6   6 -16 8610.30 1045.38   1
   6   6 -15 47054.1 1754.47   1
   6   6   9 50894.9 3164.80  -2
   6  -6 -15 50894.9 3164.80   1
   6   6 -14 16825.9 1282.21   1
   6   6   8 22397.8 1503.66  -2
   6  -6 -14 22397.8 1503.66   1
   6   6 -13 67784.3 2666.24   1
   6  -6   7 74972.6 1978.17  -2
   6   6 -13 74972.6 1978.17   1
   6   6 -12 3506.19 936.803   1
   6  -6   6 3081.18 1042.71  -2
   6   6 -12 3081.18 1042.71   1
   6   6 -11 26221.6 3417.10   1
   6  -6   5 29818.8 1636.21  -2
   6   6 -11 29818.8 1636.21   1
   6  -6   4 34852.1 1930.72  -2
   6   6 -10 34852.1 1930.72   1
   6  -6   3 45928.7 2121.46  -2
   6   6  -9 45928.7 2121.46   1
  -6  -6  -2 22138.2 1992.93  -2
  -6   6   8 22138.2 1992.93   1
   6   6   1 59221.0 2886.52  -2
   6  -6  -7 59221.0 2886.52   1
   6   6   0 3195.76 1526.47  -2
   6  -6  -6 3195.76 1526.47   1
   6   6  -1 46119.5 2467.16  -2
   6  -6  -5 46119.5 2467.16   1
   6   6  -4 9699.77 1240.71   1
   6   6  -2 19688.0 1867.02  -2
   6  -6  -4 19688.0 1867.02   1
   6   6  -3 73443.6 2706.43   1
   6   6  -3 97290.9 3075.09  -2
   6  -6  -3 97290.9 3075.09   1
   6   6  -2 27298.7 1908.53   1
   6   6  -4 31728.5 2028.03  -2
   6  -6  -2 31728.5 2028.03   1
   6   6  -1 66322.4 2531.49   1
   6   6  -5 68984.2 2672.18  -2
   6  -6  -1 68984.2 2672.18   1
   6   6   0 6873.30 1302.61   1
   6   6  -6 6007.88 1861.15  -2
   6  -6   0 6007.88 1861.15   1
   6   6   1 80485.7 3054.00   1
   6   6  -7 86255.5 4000.68  -2
   6  -6   1 86255.5 4000.68   1
   6   6   2 27000.6 2030.33   1
   6   6  -8 30092.2 1664.74  -2
   6  -6   2 30092.2 1664.74   1
   6   6   3 67636.5 2963.24   1
  -6  -6   9 68238.5 2033.49  -2
  -6   6  -3 68238.5 2033.49   1
   6   6   4 49417.9 2697.29   1
  -6  -6  10 46371.8 1663.76  -2
  -6   6  -4 46371.8 1663.76   1
   6   6   5 5861.68 1476.62   1
  -6  -6  11 16330.3 1501.20  -2
  -6   6  -5 16330.3 1501.20   1
  -6  -6  -6 139.568 832.919   1
  -6  -6  12 425.129 1153.12  -2
  -6   6  -6 425.129 1153.12   1
  -6   6  -7 13835.1 1184.43   1
  -6  -6  13 46699.8 3325.78  -2
  -6   6  -7 46699.8 3325.78   1
  -6  -6  -8 11566.8 854.160   1
  -6  -6  14 21225.9 1542.79  -2
  -6   6  -8 21225.9 1542.79   1
  -6   6  -9 6365.20 1296.93   1
  -6  -6  15 33281.6 2642.87  -2
  -6   6  -9 33281.6 2642.87   1
  -6   6 -10 24889.6 1529.57   1
  -6   6 -11 16037.6 1345.18   1
  -6   6 -12 7622.91 1008.40   1
  -6   6 -13 40875.8 1871.08   1
  -6   6 -14 3872.09 805.602   1
  -6   6 -15 41799.6 3314.00   1
  -6   6 -16 20542.5 1810.35   1
   6   7 -21 32385.5 885.405   1
   6   7 -20 10147.9 661.155   1
   6   7 -19 25438.1 1000.72   1
   6   7 -18 14934.2 969.660   1
   6   7 -17 21714.8 1234.20   1
   6   7 -16 4237.74 922.703   1
   6   7 -15 3983.12 1000.80   1
   6  -7   9 43771.9 1923.01  -2
   6   7 -15 43771.9 1923.01   1
   6   7 -14 641.941 900.592   1
   6  -7   8 4482.72 1405.64  -2
   6   7 -14 4482.72 1405.64   1
   6   7 -13 18203.2 3317.72   1
   6  -7   7 87931.8 2528.05  -2
   6   7 -13 87931.8 2528.05   1
   6   7 -12 26766.1 2855.22   1
   6  -7   6 38093.7 1963.17  -2
   6   7 -12 38093.7 1963.17   1
   6   7 -11 80697.3 2554.56   1
   6  -7   5 144343. 2342.23  -2
   6   7 -11 144343. 2342.23   1
   6  -7 -10 6557.47 1734.46   1
  -6  -7  -4 12263.6 1323.11  -2
  -6   7  10 12263.6 1323.11   1
  -6  -7  -3 231453. 3733.32  -2
  -6   7   9 231453. 3733.32   1
   6  -7  -8 24833.2 2384.91   1
  -6  -7  -2 29657.4 1640.93  -2
  -6   7   8 29657.4 1640.93   1
  -6  -7  -1 175019. 4285.30  -2
  -6   7   7 175019. 4285.30   1
  -6  -7   0 49980.6 2538.48  -2
  -6   7   6 49980.6 2538.48   1
   6   7  -1 116731. 5073.87  -2
   6  -7  -5 116731. 5073.87   1
   6   7  -4 8595.60 1232.38   1
   6   7  -2 5948.08 1558.99  -2
   6  -7  -4 5948.08 1558.99   1
   6   7  -3 79363.4 2894.42   1
   6   7  -3 107434. 3309.19  -2
   6  -7  -3 107434. 3309.19   1
   6   7  -2 1284.47 1075.10   1
   6   7  -4 3711.14 1375.44  -2
   6  -7  -2 3711.14 1375.44   1
   6   7  -1 5750.35 1301.73   1
   6   7  -5 66213.1 5693.73  -2
   6  -7  -1 66213.1 5693.73   1
   6   7   0 15464.2 1607.53   1
   6   7  -6 36618.7 1695.89  -2
   6  -7   0 36618.7 1695.89   1
   6   7   1 19820.8 1910.44   1
   6   7  -7 104094. 2600.23  -2
   6  -7   1 104094. 2600.23   1
   6   7   2 1290.42 1181.44   1
   6   7  -8 15315.1 1393.47  -2
   6  -7   2 15315.1 1393.47   1
   6   7   3 152681. 4381.99   1
  -6  -7   9 211542. 3489.62  -2
  -6   7  -3 211542. 3489.62   1
   6   7   4 13178.3 1687.37   1
  -6  -7  10 15600.0 1402.19  -2
  -6   7  -4 15600.0 1402.19   1
  -6  -7  11 177331. 3129.24  -2
  -6   7  -5 177331. 3129.24   1
  -6  -7  -6 19403.1 1093.71   1
  -6  -7  12 34574.0 1873.66  -2
  -6   7  -6 34574.0 1873.66   1
  -6  -7  -7 150863. 2368.74   1
  -6  -7  13 165425. 3517.15  -2
  -6   7  -7 165425. 3517.15   1
  -6  -7  -8 11150.4 1023.44   1
  -6  -7  14 10496.5 1539.66  -2
  -6   7  -8 10496.5 1539.66   1
  -6  -7  -9 98579.9 2040.13   1
  -6  -7  15 90557.2 4558.83  -2
  -6   7  -9 90557.2 4558.83   1
  -6   7 -10 3601.22 973.038   1
  -6   7 -11 22352.4 1425.01   1
  -6   7 -12 401.945 809.566   1
  -6   7 -13 1533.23 714.403   1
  -6   7 -14 56.6190 682.303   1
  -6   7 -15 6860.41 696.783   1
  -6   7 -16 2344.71 454.096   1
  -6  -8  21 7131.08 524.341   1
  -6   8  20 241.437 445.481   1
   6   8 -19 19481.5 860.064   1
  -6   8  18 255.780 623.380   1
   6   8 -17 60447.1 1610.56   1
   6   8 -16 358.566 728.795   1
   6   8 -15 125742. 3577.30   1
  -6  -8  -9 131931. 2756.56  -2
  -6   8  15 131931. 2756.56   1
   6   8 -14 1310.48 897.013   1
  -6  -8  -8 2559.92 1812.90  -2
  -6   8  14 2559.92 1812.90   1
   6   8 -13 166436. 3897.80   1
  -6  -8  -7 159988. 2709.51  -2
  -6   8  13 159988. 2709.51   1
   6   8 -12 180.563 1367.63   1
  -6  -8  -6 1094.32 1062.19  -2
  -6   8  12 1094.32 1062.19   1
   6   8 -11 66602.3 2506.25   1
  -6  -8  -5 83794.6 2387.82  -2
  -6   8  11 83794.6 2387.82   1
   6   8 -10-77.2681 1042.87   1
  -6  -8  -4 9595.95 1576.77  -2
  -6   8  10 9595.95 1576.77   1
  -6  -8  -3 55907.0 2451.75  -2
  -6   8   9 55907.0 2451.75   1
   6   8  -8 9165.71 958.603   1
  -6  -8  -2 13625.4 1332.51  -2
  -6   8   8 13625.4 1332.51   1
  -6  -8  -1 84388.1 2467.53  -2
  -6   8   7 84388.1 2467.53   1
  -6  -8   0 3929.19 1216.57  -2
  -6   8   6 3929.19 1216.57   1
  -6  -8   1 139408. 2958.93  -2
  -6   8   5 139408. 2958.93   1
   6   8  -4 618.650 1247.80   1
  -6  -8   2 4583.95 1178.53  -2
  -6   8   4 4583.95 1178.53   1
   6   8  -3 150222. 4069.89   1
   6   8  -3 227015. 3007.67  -2
   6  -8  -3 227015. 3007.67   1
   6   8  -2 9707.22 1498.78   1
   6   8  -4 10942.7 1368.04  -2
   6  -8  -2 10942.7 1368.04   1
   6   8  -1 179460. 4580.57   1
   6   8  -5 206701. 3035.81  -2
   6  -8  -1 206701. 3035.81   1
   6   8   0 4038.19 1284.70   1
   6   8  -6 4678.71 1258.22  -2
   6  -8   0 4678.71 1258.22   1
   6   8   1 166292. 4510.11   1
   6   8  -7 167981. 3055.47  -2
   6  -8   1 167981. 3055.47   1
   6   8   2 10090.6 1576.11   1
   6   8  -8 15597.1 1447.21  -2
   6  -8   2 15597.1 1447.21   1
   6   8   3 117771. 4048.55   1
   6   8  -9 107668. 2565.04  -2
   6  -8   3 107668. 2565.04   1
  -6  -8  10 23435.4 1562.33  -2
  -6   8  -4 23435.4 1562.33   1
  -6  -8  11 62811.2 2198.64  -2
  -6   8  -5 62811.2 2198.64   1
  -6  -8  -6 772.083 779.597   1
  -6  -8  12 1636.99 1467.81  -2
  -6   8  -6 1636.99 1467.81   1
  -6  -8  -7 1249.59 816.244   1
  -6  -8  13 78239.8 2337.73  -2
  -6   8  -7 78239.8 2337.73   1
  -6  -8  -8 547.224 668.762   1
  -6  -8  14 792.885 1316.38  -2
  -6   8  -8 792.885 1316.38   1
  -6   8  -9 26677.6 1268.32   1
  -6  -8  15 92633.5 5220.79  -2
  -6   8  -9 92633.5 5220.79   1
  -6   8 -10 3440.84 917.133   1
  -6   8 -11 72924.7 2032.90   1
  -6   8 -12 5632.84 916.978   1
  -6   8 -13 88163.7 1771.69   1
  -6   8 -14 1905.90 659.233   1
  -6   8 -15 71046.5 1298.74   1
   6   9 -20 727.785 428.449   1
   6   9 -19 26256.2 1016.82   1
  -6   9  18 386.582 549.044   1
   6   9 -17 27212.5 1118.04   1
  -6   9  16 407.919 682.648   1
   6   9 -15 242.007 840.962   1
  -6  -9  -9 32124.8 1538.72  -2
  -6   9  15 32124.8 1538.72   1
   6   9 -14 267.678 838.494   1
  -6  -9  -8 3418.88 1005.76  -2
  -6   9  14 3418.88 1005.76   1
   6   9 -13 18686.1 1706.62   1
  -6  -9  -7 84533.7 3505.13  -2
  -6   9  13 84533.7 3505.13   1
   6   9 -12 11385.2 1828.90   1
  -6  -9  -6 13457.3 1238.06  -2
  -6   9  12 13457.3 1238.06   1
  -6  -9  -5 149363. 2898.15  -2
  -6   9  11 149363. 2898.15   1
   6   9 -10 8822.94 1218.23   1
  -6  -9  -4 7148.45 1140.93  -2
  -6   9  10 7148.45 1140.93   1
   6   9  -9 93632.8 2247.44   1
  -6  -9  -3 146217. 5490.33  -2
  -6   9   9 146217. 5490.33   1
  -6  -9  -2 1753.88 1229.85  -2
  -6   9   8 1753.88 1229.85   1
[truncated: 127,181 more chars]
