# Supplementary material
Source: MDPI journal article supplement (https://www.mdpi.com/2304-6740/7/3/28)
Supplement: s1 [file s1 › inorganics-445955-supplementary/cif and checkcif files/complex 3.cif]

 
data_xs0849a
 
_audit_creation_method            'SHELXL-2014/7'
_shelx_SHELXL_version_number      '2014/7'
_chemical_name_systematic         ?
_chemical_name_common             ?
_chemical_melting_point           ?
_chemical_formula_moiety          
 'C36 H26 Au2 Cl O P2, F6 Sb'
_chemical_formula_sum
 'C72 H52 Au4 Cl2 F12 O2 P4 Sb2' 
_chemical_formula_weight          2403.28

_twin_information
;

 * * * CRYSALIS TWIN DATA REDUCTION FINALIZING (Version 1.171.37.35 (release 13-08-2014 CrysAlis171 .NET)) * * *
Laue class: 1bar - Friedel mate is equivalent
Lattice type: P-lattice 
DC PROFFITRRPTWIN INFO: Step 1 - Loading orientation matrices (UB) of 2 components
 
DC PROFFITRRPTWIN INFO: Loading UB component 1
 
DC PROFFITRRPTWIN INFO: Loading UB component 2
 
DC PROFFITRRPTWIN INFO: Step 2 - Computing crossed twin laws
 
Twin law determination (relative to component 1)
Matrix 1 is taken from component 1 (  10.934   13.951   22.958    88.57    87.04    89.59)
Matrix 2 is taken from component 2 (  10.935   13.951   22.954    88.59    87.04    89.60)
Twin analysis: Component 1 with component 2
TL  =UB[1]-1*UB[2]:  -1.0000   0.0018   0.0003    -0.0034  -1.0000   0.0006    -0.2148  -0.0788   1.0002   det 1.000109
TL-1=UB[2]*UB[1]-1:  -1.0001  -0.0019   0.0003     0.0032  -1.0001   0.0006    -0.2145  -0.0792   0.9999   det 0.999891
Rot= -179.8531 deg around the following vectors: 
Reciprocal space (hkl): 0.0001 0.0004 1.0000
Direct space (uvw)    : -0.1066 -0.0392 0.9935
 
DC PROFFITRRPTWIN INFO: Step 3 - Loading reflections of 2 components
 
DC PROFFITRRPTWIN ALL INFO: Component 1
DC PROFFITRRPTWIN INFO: Face list of component 1 
  1:   0.9983  -0.0050 -15.0029  d=   0.0155
  2:   0.0016   0.0048  15.0013  d=   0.0334
  3:   6.9993  -0.0016  -1.0115  d=   0.0650
  4:   3.9999  -6.9978  -2.9967  d=   0.0430
  5:  -6.9993   1.0010   1.0101  d=   0.0491
  6:   0.9993   8.9955   1.9855  d=   0.0537
  7:  -0.9993  -8.9955  -1.9855  d=   0.0500
  8:  -0.9982  -3.9934  13.0085  d=   0.0295
  9:   5.0003  -5.9969   2.0007  d=   0.0477
 10:   0.0017  -3.9936  13.0069  d=   0.0295
 11:  -2.0014   4.9941 -11.0049  d=   0.0543
 12:   0.0005   6.9993   9.9908  d=   0.0441
 13:   7.0000   0.0007   5.9891  d=   0.0638
 14:   0.9983   6.9931  -9.0125  d=   0.0415
DC PROFFITRRPTWIN ALL INFO: Component 2
DC PROFFITRRPTWIN INFO: Face list of component 2 
  1:  -1.0024  -0.0002 -15.2147  d=   0.0155
  2:   0.0024   0.0036  14.9987  d=   0.0334
  3:  -6.9999   0.0237  -2.5123  d=   0.0650
  4:  -3.9880   7.0095  -3.3001  d=   0.0430
  5:   6.9981  -1.0232   2.4318  d=   0.0491
  6:  -1.0156  -8.9917   1.0588  d=   0.0537
  7:   1.0156   8.9917  -1.0588  d=   0.0500
  8:   1.0091   3.9977  13.5371  d=   0.0295
  9:  -4.9889   6.0146   1.4029  d=   0.0477
 10:   0.0092   4.0011  13.3211  d=   0.0295
 11:   1.9893  -5.0070 -10.9697  d=   0.0543
 12:  -0.0108  -6.9941   9.4352  d=   0.0441
 13:  -6.9988   0.0253   4.4871  d=   0.0638
 14:  -1.0138  -6.9953  -9.7792  d=   0.0415
 
DC PROFFITRRPTWIN INFO: Step 4 - Analysing composite reflections of 2 components
 
Component 1: 43873 observations read
Component 2: 43827 observations read

52854 composite observations collected (18184 fully isolated, 34670 overlapped), 44 skipped due to one or more missing parts and 60 skipped due to I/sig<-3.0


OVERLAP STATISTICS

2 COMPONENTS

COMPONENTS 1, 2
 Overlap factor | # in range | % of all obs 
 -------------- | ---------- | ------------ 
   0.00 - 0.20  |       9407 |    17.8 <--- ALMOST SEPARATED
   0.20 - 0.40  |       7159 |    13.5
   0.40 - 0.60  |       6308 |    11.9
   0.60 - 0.80  |       6704 |    12.7
   0.80 - 1.00  |       5092 |     9.6 <--- FULLY OVERLAPPED
 -------------- | ---------- | ------------ 
      Total     |      34670 |    65.6

 
DC PROFFITRRPTWIN INFO: Step 5 - Scaling data & analysing twin ratios of 2 components
 
Computed twin ratios:
Twin 1: 53.56% (29516 common observations, 10204 merged)
Twin 2: 46.44% (28450 common observations, 10204 merged)

Preparing data for SCALE3 ABSPACK...

SCALING COMPONENT 1

25977 of 43785 reflections used for ABSPACK refinement
PROFFIT INFO: Inet (after scale3 abspack): min=-6329960.0000 max=18099074.0000
PROFFIT INFO: sig(Inet) (after scale3 abspack): min=455.9661 max=124463.2422


SCALING COMPONENT 2

25942 of 43739 reflections used for ABSPACK refinement
PROFFIT INFO: Inet (after scale3 abspack): min=-8992953.0000 max=18099074.0000
PROFFIT INFO: sig(Inet) (after scale3 abspack): min=428.6995 max=165224.5000

Computed twin ratios:
Twin 1: 55.21% (29516 common observations, 10204 merged)
Twin 2: 44.79% (28450 common observations, 10204 merged)

DC PROFFITRRPTWIN INFO: Determining HKLF4 overlap threshold for completeness requirement (>=80.0%)
DC PROFFITRRPTWIN INFO: New HKLF4 overlap threshold - 0.59

DC PROFFITRRPTWIN INFO: Step 6 - Decomposed intensities statistics (HKLF4)
 
COMPONENT 1

 
Note: The Rint, Rsigma and RsigmaB values are computed for redundant data only!
	Mean F2 and F2/sig(F2) are given for all measured values!
Note: The RsigmaA values are computed for all measured values!

Help: For more information about computations of rint and rsigma please look into Crysalis help: 
 file:__#HELP_DTheoryAlgorithm_DataReductionOutput.html
 

Statistics vs intensity - point group symmetry: P-1
                      #        #        #      average    mean      mean        
         intensity measured   kept    unique  redundancy   F2     F2/sig(F2)   Rint   Rsigma
--------------------------------------------------------------------------------------------
 17308160-  706756     3673     3673     1101    3.3   1645321.54    51.66    0.056    0.064
   706256-  355915     3368     3368     1101    3.1    507565.72    29.25    0.081    0.089
   355892-  207667     3197     3197     1101    2.9    272888.24    20.74    0.091    0.098
   207630-  128277     3186     3186     1101    2.9    164242.53    15.43    0.122    0.127
   128260-   79860     3203     3203     1101    2.9    102017.92    10.77    0.169    0.174
    79792-   47456     3092     3092     1101    2.8     62529.66     7.61    0.175    0.187
    47434-   26039     3123     3123     1101    2.8     36003.28     4.92    0.248    0.265
    26015-   12255     3132     3132     1101    2.8     18714.09     2.75    0.372    0.427
    12247-    4062     3079     3079     1101    2.8      7867.49     1.26    0.541    0.636
     4062--1091397     2951     2951     1108    2.7    -12216.34    -0.48    0.979    1.464
------------------------------------------------------------------------------------------
 17308160--1091397    32004    32004    11017    2.9    307079.65    15.25    0.084    0.095
 

Statistics vs resolution - point group symmetry: P-1
resolu-      #        #        #               average    mean      mean          
tion(A)   measured   kept    unique           redundancy   F2     F2/sig(F2)   Rint   Rsigma   RsigmaA
------------------------------------------------------------------------------------------------------
 inf-1.78     4114     4114     1101             3.7    797742.67    28.73    0.071    0.084     0.023
1.78-1.42     3237     3237     1101             2.9    481563.24    15.07    0.085    0.095     0.046
1.42-1.24     3574     3574     1101             3.2    362867.04    13.56    0.097    0.108     0.056
1.24-1.11     4047     4047     1101             3.7    255023.02    13.08    0.100    0.115     0.058
1.11-1.03     3273     3273     1101             3.0    237868.02    14.50    0.086    0.096     0.051
1.03-0.96     3240     3240     1101             2.9    185507.04    13.01    0.083    0.089     0.058
0.96-0.92     3025     3025     1101             2.7    142616.78    11.66    0.095    0.105     0.066
0.92-0.88     2786     2786     1101             2.5    134280.27    12.34    0.084    0.089     0.063
0.88-0.84     2553     2553     1101             2.3    108829.53    12.30    0.087    0.090     0.063
0.84-0.81     2155     2155     1108             1.9     90548.25    13.52    0.090    0.094     0.061
------------------------------------------------------------------------------------------------------
 inf-0.81    32004    32004    11017             2.9    307079.65    15.25    0.084    0.095     0.045
 

Statistics vs resolution (taking redundancy into account) - point group symmetry: P-1
resolu-      #        #        #       %       average    mean      mean          
tion(A)    kept     theory   unique complete  redundancy   F2     F2/sig(F2)   Rint  RsigmaB
--------------------------------------------------------------------------------------------
 inf-1.78     4114     1288     1101   85.5      3.7    797742.67    55.64    0.071    0.013
1.78-1.42     3237     1287     1101   85.5      2.9    481563.24    27.15    0.085    0.027
1.42-1.24     3574     1301     1101   84.6      3.2    362867.04    24.52    0.097    0.033
1.24-1.11     4047     1470     1101   74.9      3.7    255023.02    24.24    0.100    0.032
1.11-1.03     3273     1431     1101   76.9      3.0    237868.02    25.72    0.086    0.031
1.03-0.96     3240     1387     1101   79.4      2.9    185507.04    22.65    0.083    0.035
0.96-0.92     3025     1371     1101   80.3      2.7    142616.78    19.62    0.095    0.040
0.92-0.88     2786     1366     1101   80.6      2.5    134280.27    20.10    0.084    0.040
0.88-0.84     2553     1403     1101   78.5      2.3    108829.53    19.15    0.087    0.040
0.84-0.81     2155     1466     1108   75.6      1.9     90548.25    19.15    0.090    0.040
--------------------------------------------------------------------------------------------
 inf-0.81    32004    13770    11017   80.0      2.9    307079.65    27.05    0.084    0.027
DC PROFFITRRPTWIN INFO: Step 7 - Generating output files
 
HKLF 4
Reflections read=43785, from those 32004 with overlapping factor < 0.586 written to file D:\Data\xs0849a\test_twin1_hklf4.hkl, 11781 skipped
Use the HKLF 4 file(s) for structure solution.

HKLF 5 merged
RINT ANALYSIS FOR ALL HKLF5 REFLECTIONS
 Components measured    kept     unique redundancy F2/sig(F2) Rint      Rsigma
------------------------------------------------------------------------------
1,2          43785     37724     15096     2.50     18.55     0.038     0.043

RINT ANALYSIS FOR OVERLAPPED REFLECTIONS
 Components measured    kept     unique redundancy F2/sig(F2) Rint      Rsigma
------------------------------------------------------------------------------
1,2          34670     29212     11372     2.57     19.15     0.039     0.043

RINT ANALYSIS FOR ISOLATED REFLECTIONS
 Component measured     kept     unique redundancy F2/sig(F2) Rint      Rsigma
------------------------------------------------------------------------------
     1        9115      8512      3724     2.29     16.59     0.028     0.043
     2           0         0         0     0.00      0.00     0.000     0.000

15096 merged reflections saved into file: D:\Data\xs0849a\test_twin1_hklf5.hkl

Use this hkl file in SHELXL with BASF instruction, which has (components minus 1) entries, and HKLF 5 instruction.
E.g. Two component twin: 'BASF n2' in .ins file, BASF n1 can be computed as n1 = 1.0 - n2.
E.g. Three component twin: 'BASF n2 n3' in .ins file, BASF n1 can be computed as n1 = 1.0 - (n2 + n3).

BASF 0.44794 
;

loop_
 _atom_type_symbol
 _atom_type_description
 _atom_type_scat_dispersion_real
 _atom_type_scat_dispersion_imag
 _atom_type_scat_source
 'C'  'C'   0.0181   0.0091
 'International Tables Vol C Tables 4.2.6.8 and 6.1.1.4'
 'H'  'H'   0.0000   0.0000
 'International Tables Vol C Tables 4.2.6.8 and 6.1.1.4'
 'O'  'O'   0.0492   0.0322
 'International Tables Vol C Tables 4.2.6.8 and 6.1.1.4'
 'F'  'F'   0.0727   0.0534
 'International Tables Vol C Tables 4.2.6.8 and 6.1.1.4'
 'P'  'P'   0.2955   0.4335
 'International Tables Vol C Tables 4.2.6.8 and 6.1.1.4'
 'Cl'  'Cl'   0.3639   0.7018
 'International Tables Vol C Tables 4.2.6.8 and 6.1.1.4'
 'Sb'  'Sb'  -0.0562   5.8946
 'International Tables Vol C Tables 4.2.6.8 and 6.1.1.4'
 'Au'  'Au'  -4.4197   7.2980
 'International Tables Vol C Tables 4.2.6.8 and 6.1.1.4'
 
_space_group_crystal_system       triclinic
_space_group_IT_number            2
_space_group_name_H-M_alt         'P -1'
_space_group_name_Hall            '-P 1'
 
_shelx_space_group_comment
;
The symmetry employed for this shelxl refinement is uniquely defined
by the following loop, which should always be used as a source of
symmetry information in preference to the above space-group names.
They are only intended as comments.
;
 
loop_
 _space_group_symop_operation_xyz
 'x, y, z'
 '-x, -y, -z'
 
_cell_length_a                    10.9408(3)
_cell_length_b                    13.9559(4)
_cell_length_c                    22.9525(8)
_cell_angle_alpha                 88.551(3)
_cell_angle_beta                  87.044(3)
_cell_angle_gamma                 89.587(2)
_cell_volume                      3498.74(19)
_cell_formula_units_Z             2
_cell_measurement_temperature     110(2)
_cell_measurement_reflns_used     11305
_cell_measurement_theta_min       4.37
_cell_measurement_theta_max       72.06
 
_exptl_crystal_description        'small block'
_exptl_crystal_colour             colorless
_exptl_crystal_density_meas       ?
_exptl_crystal_density_method     ?
_exptl_crystal_density_diffrn     2.281          
_exptl_crystal_F_000              2240
_exptl_transmission_factor_min    ?
_exptl_transmission_factor_max    ?
_exptl_crystal_size_max           0.12
_exptl_crystal_size_mid           0.10
_exptl_crystal_size_min           0.05
_exptl_absorpt_coefficient_mu     23.648
_shelx_estimated_absorpt_T_min    ?
_shelx_estimated_absorpt_T_max    ?
_exptl_absorpt_correction_type    analytical
_exptl_absorpt_correction_T_min   0.142
_exptl_absorpt_correction_T_max   0.446
_exptl_absorpt_process_details    
;
CrysAlisPro, Agilent Technologies,
Version 1.171.37.35 (release 13-08-2014 CrysAlis171 .NET)
(compiled Aug 13 2014,18:06:01)
Analytical numeric absorption correction using a multifaceted crystal
			model based on expressions derived by R.C. Clark & J.S. Reid.
(Clark, R. C. & Reid, J. S. (1995). Acta Cryst. A51, 887-897)
Empirical absorption correction using spherical harmonics,
 implemented in SCALE3 ABSPACK scaling algorithm.
;
_exptl_absorpt_special_details    ?
_diffrn_ambient_temperature       110(2)
_diffrn_radiation_wavelength      1.54178
_diffrn_radiation_type            CuK\a
_diffrn_radiation_source          'SuperNova (Cu) X-ray Source' 
_diffrn_radiation_monochromator   'mirror' 
_diffrn_measurement_device_type   'SuperNova, Dual, Cu at zero, Atlas' 
_diffrn_measurement_method        '\w scans'
_diffrn_standards_number          '.'
_diffrn_standards_interval_time   '.'
_diffrn_standards_decay_%         '.'
_diffrn_reflns_number             15046
_diffrn_reflns_av_unetI/netI      0.0603
_diffrn_reflns_av_R_equivalents    ?
_diffrn_reflns_limit_h_min        -13
_diffrn_reflns_limit_h_max        13
_diffrn_reflns_limit_k_min        -17
_diffrn_reflns_limit_k_max        17
_diffrn_reflns_limit_l_min        -27
_diffrn_reflns_limit_l_max        28
_diffrn_reflns_theta_min          1.928
_diffrn_reflns_theta_max          71.896
_diffrn_reflns_theta_full         67.679
_diffrn_measured_fraction_theta_max   0.999
_diffrn_measured_fraction_theta_full  1.000
_diffrn_reflns_Laue_measured_fraction_max    0.999
_diffrn_reflns_Laue_measured_fraction_full   1.000
_diffrn_reflns_point_group_measured_fraction_max   0.999
_diffrn_reflns_point_group_measured_fraction_full  1.000
_reflns_number_total              15046
_reflns_number_gt                 13204
_reflns_threshold_expression      'I > 2\s(I)'
_reflns_Friedel_coverage          0.000
_reflns_Friedel_fraction_max      .
_reflns_Friedel_fraction_full     .
 
_reflns_special_details
;
 _reflns_Friedel_fraction is defined as the number of unique
 Friedel pairs measured divided by the number that would be
 possible theoretically, ignoring centric projections and
 systematic absences.
;
 
_computing_data_collection
;
CrysAlisPro, Agilent Technologies,
Version 1.171.37.35 (release 13-08-2014 CrysAlis171 .NET)
(compiled Aug 13 2014,18:06:01)
;
_computing_cell_refinement
;
CrysAlisPro, Agilent Technologies,
Version 1.171.37.35 (release 13-08-2014 CrysAlis171 .NET)
(compiled Aug 13 2014,18:06:01)
;
_computing_data_reduction         
;
CrysAlisPro, Agilent Technologies,
Version 1.171.37.35 (release 13-08-2014 CrysAlis171 .NET)
(compiled Aug 13 2014,18:06:01)
;
_computing_structure_solution     'SHELXS-2014/7 (Sheldrick, 2015)'
_computing_structure_refinement   'SHELXL-2014/7 (Sheldrick, 2015)'
_computing_molecular_graphics     'SHELXTL v6.10 (Sheldrick, 2008)'
_computing_publication_material   'SHELXTL v6.10 (Sheldrick, 2008)'
_refine_special_details
;
 Refined as a 2-component twin.
;
_refine_ls_structure_factor_coef  Fsqd
_refine_ls_matrix_type            full
_refine_ls_weighting_scheme       calc
_refine_ls_weighting_details
'w=1/[\s^2^(Fo^2^)+(0.0716P)^2^] where P=(Fo^2^+2Fc^2^)/3'
_atom_sites_solution_primary      direct
_atom_sites_solution_secondary    difmap
_atom_sites_solution_hydrogens    geom
_refine_ls_hydrogen_treatment     constr
_refine_ls_extinction_method      none
_refine_ls_extinction_coef        .
_refine_ls_number_reflns          15046
_refine_ls_number_parameters      884
_refine_ls_number_restraints      18
_refine_ls_R_factor_all           0.0451
_refine_ls_R_factor_gt            0.0382
_refine_ls_wR_factor_ref          0.1116
_refine_ls_wR_factor_gt           0.1077
_refine_ls_goodness_of_fit_ref    1.038
_refine_ls_restrained_S_all       1.037
_refine_ls_shift/su_max           0.002
_refine_ls_shift/su_mean          0.000
 
loop_
 _atom_site_label
 _atom_site_type_symbol
 _atom_site_fract_x
 _atom_site_fract_y
 _atom_site_fract_z
 _atom_site_U_iso_or_equiv
 _atom_site_adp_type
 _atom_site_occupancy
 _atom_site_site_symmetry_order  
 _atom_site_calc_flag
 _atom_site_refinement_flags_posn
 _atom_site_refinement_flags_adp
 _atom_site_refinement_flags_occupancy
 _atom_site_disorder_assembly
 _atom_site_disorder_group
Au1 Au 0.73224(4) 0.55112(3) 0.05086(2) 0.01940(9) Uani 1 1 d . . . . .
Au2 Au 0.75127(4) 0.55427(3) 0.18016(2) 0.01993(9) Uani 1 1 d . . . . .
Cl1A Cl 0.7116(2) 0.68103(16) 0.11410(10) 0.0258(5) Uani 1 1 d . . . . .
P1A P 0.7393(2) 0.41583(16) 0.00063(10) 0.0160(4) Uani 1 1 d . . . . .
P2A P 0.7776(2) 0.42432(17) 0.23728(10) 0.0179(4) Uani 1 1 d . . . . .
C1A C 0.9238(8) 0.3325(7) 0.0640(4) 0.0189(18) Uani 1 1 d . U . . .
C2A C 0.8798(8) 0.3479(7) 0.0089(4) 0.0189(18) Uani 1 1 d . . . . .
C3A C 0.9411(9) 0.2994(7) -0.0362(4) 0.0230(19) Uani 1 1 d . . . . .
H3A H 0.9139 0.3065 -0.0747 0.028 Uiso 1 1 calc R U . . .
C4A C 1.0422(8) 0.2404(7) -0.0259(4) 0.0198(18) Uani 1 1 d . . . . .
H4A H 1.0824 0.2090 -0.0578 0.024 Uiso 1 1 calc R U . . .
C5A C 1.0853(8) 0.2265(7) 0.0291(4) 0.0175(17) Uani 1 1 d . . . . .
H5A H 1.1540 0.1862 0.0353 0.021 Uiso 1 1 calc R U . . .
C6A C 1.0248(8) 0.2735(6) 0.0757(4) 0.0168(17) Uani 1 1 d . . . . .
C7A C 1.0341(8) 0.2771(7) 0.1381(4) 0.0199(18) Uani 1 1 d . . . . .
C8A C 0.9400(8) 0.3362(7) 0.1584(4) 0.0189(18) Uani 1 1 d . U . . .
C9A C 0.9154(8) 0.3560(6) 0.2177(4) 0.0161(17) Uani 1 1 d . . . . .
C10A C 0.9925(9) 0.3144(7) 0.2568(4) 0.0216(19) Uani 1 1 d . . . . .
H10A H 0.9794 0.3259 0.2973 0.026 Uiso 1 1 calc R U . . .
C11A C 1.0901(9) 0.2550(8) 0.2378(5) 0.025(2) Uani 1 1 d . . . . .
H11A H 1.1421 0.2273 0.2656 0.030 Uiso 1 1 calc R U . . .
C12A C 1.1115(9) 0.2365(7) 0.1795(5) 0.024(2) Uani 1 1 d . . . . .
H12A H 1.1781 0.1966 0.1672 0.029 Uiso 1 1 calc R U . . .
C13A C 0.7272(9) 0.4296(7) -0.0771(4) 0.0201(18) Uani 1 1 d . . . . .
C14A C 0.6373(9) 0.3825(7) -0.1064(4) 0.024(2) Uani 1 1 d . . . . .
H14A H 0.5818 0.3408 -0.0854 0.028 Uiso 1 1 calc R U . . .
C15A C 0.6289(10) 0.3965(8) -0.1658(5) 0.026(2) Uani 1 1 d . . . . .
H15A H 0.5662 0.3652 -0.1851 0.031 Uiso 1 1 calc R U . . .
C16A C 0.7097(10) 0.4549(7) -0.1977(4) 0.026(2) Uani 1 1 d . . . . .
H16A H 0.7041 0.4626 -0.2387 0.031 Uiso 1 1 calc R U . . .
C17A C 0.8001(9) 0.5027(7) -0.1692(4) 0.024(2) Uani 1 1 d . . . . .
H17A H 0.8564 0.5431 -0.1908 0.029 Uiso 1 1 calc R U . . .
C18A C 0.8075(8) 0.4914(7) -0.1097(4) 0.0202(19) Uani 1 1 d . . . . .
H18A H 0.8674 0.5258 -0.0903 0.024 Uiso 1 1 calc R U . . .
C19A C 0.6165(8) 0.3362(7) 0.0265(4) 0.0173(17) Uani 1 1 d . . . . .
C20A C 0.6277(9) 0.2379(7) 0.0211(4) 0.0221(19) Uani 1 1 d . . . . .
H20A H 0.7017 0.2109 0.0052 0.027 Uiso 1 1 calc R U . . .
C21A C 0.5305(9) 0.1792(7) 0.0389(5) 0.026(2) Uani 1 1 d . . . . .
H21A H 0.5389 0.1116 0.0361 0.031 Uiso 1 1 calc R U . . .
C22A C 0.4205(9) 0.2185(8) 0.0610(4) 0.026(2) Uani 1 1 d . . . . .
H22A H 0.3535 0.1783 0.0726 0.031 Uiso 1 1 calc R U . . .
C23A C 0.4107(9) 0.3164(8) 0.0656(5) 0.028(2) Uani 1 1 d . . . . .
H23A H 0.3352 0.3440 0.0792 0.034 Uiso 1 1 calc R U . . .
C24A C 0.5107(9) 0.3758(7) 0.0505(4) 0.025(2) Uani 1 1 d . . . . .
H24A H 0.5055 0.4428 0.0567 0.031 Uiso 1 1 calc R U . . .
C25A C 0.6540(9) 0.3422(7) 0.2270(4) 0.023(2) Uani 1 1 d . . . . .
C26A C 0.6769(9) 0.2453(7) 0.2129(4) 0.0203(18) Uani 1 1 d . . . . .
H26A H 0.7583 0.2209 0.2102 0.024 Uiso 1 1 calc R U . . .
C27A C 0.5790(9) 0.1864(7) 0.2030(4) 0.0224(19) Uani 1 1 d . . . . .
H27A H 0.5939 0.1216 0.1930 0.027 Uiso 1 1 calc R U . . .
C28A C 0.4597(9) 0.2207(7) 0.2075(4) 0.024(2) Uani 1 1 d . . . . .
H28A H 0.3935 0.1795 0.2007 0.029 Uiso 1 1 calc R U . . .
C29A C 0.4372(9) 0.3154(7) 0.2221(4) 0.0223(19) Uani 1 1 d . . . . .
H29A H 0.3554 0.3385 0.2268 0.027 Uiso 1 1 calc R U . . .
C30A C 0.5362(9) 0.3774(7) 0.2299(4) 0.0208(18) Uani 1 1 d . . . . .
H30A H 0.5214 0.4433 0.2372 0.025 Uiso 1 1 calc R U . . .
C31A C 0.7828(10) 0.4495(8) 0.3145(4) 0.025(2) Uani 1 1 d . . . . .
C32A C 0.6921(9) 0.4172(7) 0.3551(5) 0.024(2) Uani 1 1 d . . . . .
H32A H 0.6263 0.3796 0.3432 0.029 Uiso 1 1 calc R U . . .
C33A C 0.6994(10) 0.4406(8) 0.4132(5) 0.026(2) Uani 1 1 d . . . . .
H33A H 0.6384 0.4190 0.4413 0.032 Uiso 1 1 calc R U . . .
C34A C 0.7960(11) 0.4956(8) 0.4302(4) 0.029(2) Uani 1 1 d . . . . .
H34A H 0.8008 0.5118 0.4699 0.034 Uiso 1 1 calc R U . . .
C35A C 0.8863(11) 0.5272(9) 0.3888(4) 0.031(2) Uani 1 1 d . . . . .
H35A H 0.9525 0.5644 0.4008 0.037 Uiso 1 1 calc R U . . .
C36A C 0.8799(11) 0.5048(9) 0.3306(5) 0.033(3) Uani 1 1 d . . . . .
H36A H 0.9405 0.5266 0.3023 0.040 Uiso 1 1 calc R U . . .
O1A O 0.8695(6) 0.3705(5) 0.1138(3) 0.0179(13) Uani 1 1 d . U . . .
Au3 Au 0.77625(4) 1.05063(3) 0.30406(2) 0.02443(10) Uani 1 1 d . . . . .
Au4 Au 0.77210(4) 1.05403(3) 0.43379(2) 0.02749(10) Uani 1 1 d . . . . .
Cl1B Cl 0.7774(3) 1.18313(18) 0.36592(12) 0.0428(7) Uani 1 1 d . . . . .
P1B P 0.7770(2) 0.91975(17) 0.24965(10) 0.0192(4) Uani 1 1 d . . . . .
P2B P 0.7633(2) 0.91822(18) 0.48761(11) 0.0215(5) Uani 1 1 d . . . . .
C1B C 0.9350(8) 0.8239(7) 0.3203(4) 0.0188(17) Uani 1 1 d . U . . .
C2B C 0.9075(8) 0.8440(7) 0.2628(4) 0.0188(18) Uani 1 1 d . . . . .
C3B C 0.9775(10) 0.7969(7) 0.2193(4) 0.025(2) Uani 1 1 d . . . . .
H3B H 0.9626 0.8090 0.1793 0.030 Uiso 1 1 calc R U . . .
C4B C 1.0696(10) 0.7321(8) 0.2346(5) 0.031(2) Uani 1 1 d . . . . .
H4B H 1.1135 0.6986 0.2046 0.037 Uiso 1 1 calc R U . . .
C5B C 1.0987(10) 0.7152(8) 0.2920(5) 0.029(2) Uani 1 1 d . . . . .
H5B H 1.1635 0.6726 0.3012 0.035 Uiso 1 1 calc R U . . .
C6B C 1.0308(9) 0.7622(7) 0.3366(5) 0.022(2) Uani 1 1 d . . . . .
C7B C 1.0284(10) 0.7636(7) 0.3984(5) 0.028(2) Uani 1 1 d . . . . .
C8B C 0.9347(8) 0.8243(7) 0.4152(4) 0.0209(18) Uani 1 1 d . U . . .
C9B C 0.8992(9) 0.8449(7) 0.4723(5) 0.0218(19) Uani 1 1 d . . . . .
C10B C 0.9659(10) 0.8041(8) 0.5160(5) 0.027(2) Uani 1 1 d . . . . .
H10B H 0.9460 0.8180 0.5557 0.032 Uiso 1 1 calc R U . . .
C11B C 1.0651(10) 0.7409(7) 0.5010(5) 0.029(2) Uani 1 1 d . . . . .
H11B H 1.1097 0.7115 0.5311 0.035 Uiso 1 1 calc R U . . .
C12B C 1.0976(10) 0.7214(8) 0.4432(5) 0.030(2) Uani 1 1 d . . . . .
H12B H 1.1651 0.6805 0.4337 0.036 Uiso 1 1 calc R U . . .
C13B C 0.7842(9) 0.9475(7) 0.1718(4) 0.0211(19) Uani 1 1 d . . . . .
C14B C 0.8847(10) 1.0001(8) 0.1484(5) 0.028(2) Uani 1 1 d . . . . .
H14B H 0.9456 1.0205 0.1733 0.034 Uiso 1 1 calc R U . . .
C15B C 0.8954(10) 1.0224(8) 0.0900(5) 0.032(2) Uani 1 1 d . . . . .
H15B H 0.9667 1.0538 0.0740 0.039 Uiso 1 1 calc R U . . .
C16B C 0.8006(10) 0.9987(8) 0.0533(5) 0.029(2) Uani 1 1 d . . . . .
H16B H 0.8049 1.0178 0.0133 0.035 Uiso 1 1 calc R U . . .
C17B C 0.7037(10) 0.9483(8) 0.0762(5) 0.025(2) Uani 1 1 d . . . . .
H17B H 0.6418 0.9300 0.0513 0.030 Uiso 1 1 calc R U . . .
C18B C 0.6917(10) 0.9221(7) 0.1359(4) 0.024(2) Uani 1 1 d . . . . .
H18B H 0.6220 0.8879 0.1513 0.029 Uiso 1 1 calc R U . . .
C19B C 0.6464(10) 0.8435(8) 0.2677(4) 0.026(2) Uani 1 1 d . . . . .
C20B C 0.5300(10) 0.8808(9) 0.2707(5) 0.030(2) Uani 1 1 d . . . . .
H20B H 0.5185 0.9472 0.2626 0.036 Uiso 1 1 calc R U . . .
C21B C 0.4298(10) 0.8251(9) 0.2849(5) 0.032(2) Uani 1 1 d . . . . .
H21B H 0.3499 0.8524 0.2860 0.038 Uiso 1 1 calc R U . . .
C22B C 0.4461(10) 0.7304(9) 0.2975(5) 0.032(2) Uani 1 1 d . . . . .
H22B H 0.3769 0.6916 0.3079 0.039 Uiso 1 1 calc R U . . .
C23B C 0.5604(10) 0.6899(8) 0.2956(5) 0.029(2) Uani 1 1 d . . . . .
H23B H 0.5711 0.6237 0.3047 0.035 Uiso 1 1 calc R U . . .
C24B C 0.6615(9) 0.7477(7) 0.2799(5) 0.025(2) Uani 1 1 d . . . . .
H24B H 0.7413 0.7203 0.2778 0.029 Uiso 1 1 calc R U . . .
C25B C 0.7494(10) 0.9311(8) 0.5654(4) 0.026(2) Uani 1 1 d . . . . .
C26B C 0.8332(11) 0.9905(8) 0.5924(5) 0.034(2) Uani 1 1 d . . . . .
H26B H 0.8952 1.0244 0.5700 0.040 Uiso 1 1 calc R U . . .
C27B C 0.8216(14) 0.9975(9) 0.6531(5) 0.042(3) Uani 1 1 d . . . . .
H27B H 0.8759 1.0381 0.6719 0.050 Uiso 1 1 calc R U . . .
C28B C 0.7352(13) 0.9482(8) 0.6861(5) 0.036(3) Uani 1 1 d . . . . .
H28B H 0.7313 0.9535 0.7273 0.043 Uiso 1 1 calc R U . . .
C29B C 0.6524(14) 0.8898(10) 0.6596(5) 0.043(3) Uani 1 1 d . . . . .
H29B H 0.5912 0.8560 0.6824 0.052 Uiso 1 1 calc R U . . .
C30B C 0.6607(12) 0.8820(8) 0.5996(5) 0.037(3) Uani 1 1 d . . . . .
H30B H 0.6046 0.8423 0.5814 0.044 Uiso 1 1 calc R U . . .
C31B C 0.6368(9) 0.8441(8) 0.4687(4) 0.0218(19) Uani 1 1 d . . . . .
C32B C 0.6452(10) 0.7449(7) 0.4734(5) 0.026(2) Uani 1 1 d . . . . .
H32B H 0.7194 0.7150 0.4841 0.031 Uiso 1 1 calc R U . . .
C33B C 0.5427(11) 0.6891(8) 0.4622(5) 0.031(2) Uani 1 1 d . . . . .
H33B H 0.5475 0.6211 0.4650 0.037 Uiso 1 1 calc R U . . .
C34B C 0.4383(10) 0.7321(9) 0.4475(5) 0.033(2) Uani 1 1 d . . . . .
H34B H 0.3694 0.6936 0.4409 0.040 Uiso 1 1 calc R U . . .
C35B C 0.4277(11) 0.8314(10) 0.4415(6) 0.041(3) Uani 1 1 d . . . . .
H35B H 0.3526 0.8599 0.4309 0.049 Uiso 1 1 calc R U . . .
C36B C 0.5283(10) 0.8884(8) 0.4513(5) 0.030(2) Uani 1 1 d . . . . .
H36B H 0.5236 0.9560 0.4464 0.036 Uiso 1 1 calc R U . . .
O1B O 0.8760(6) 0.8614(5) 0.3679(3) 0.0218(13) Uani 1 1 d . U . . .
Sb1 Sb 0.29777(6) 0.43914(4) 0.38163(2) 0.01933(12) Uani 1 1 d . . . . .
F1 F 0.2283(7) 0.3834(7) 0.3193(4) 0.056(2) Uani 1 1 d . . . . .
F2 F 0.1837(6) 0.3781(5) 0.4337(3) 0.0397(16) Uani 1 1 d . . . . .
F3 F 0.3675(8) 0.4981(7) 0.4436(3) 0.059(2) Uani 1 1 d . . . . .
F4 F 0.4097(6) 0.5035(5) 0.3298(3) 0.0326(14) Uani 1 1 d . . . . .
F5 F 0.4088(7) 0.3373(6) 0.3876(4) 0.054(2) Uani 1 1 d . . . . .
F6 F 0.1940(8) 0.5431(6) 0.3746(4) 0.063(3) Uani 1 1 d . . . . .
Sb2 Sb 0.29172(6) 0.94205(4) 0.12812(3) 0.02141(13) Uani 1 1 d . . . . .
F7 F 0.1793(7) 0.8666(5) 0.0907(3) 0.0441(18) Uani 1 1 d . . . . .
F8 F 0.2015(7) 0.9249(6) 0.1983(3) 0.0458(19) Uani 1 1 d . . . . .
F9 F 0.4018(6) 1.0189(5) 0.1657(3) 0.0359(15) Uani 1 1 d . . . . .
F10 F 0.3806(7) 0.9656(6) 0.0578(3) 0.0425(17) Uani 1 1 d . . . . .
F11 F 0.3881(8) 0.8342(5) 0.1429(4) 0.048(2) Uani 1 1 d . . . . .
F12 F 0.1985(6) 1.0524(5) 0.1115(3) 0.0382(16) Uani 1 1 d . . . . .
 
loop_
 _atom_site_aniso_label
 _atom_site_aniso_U_11
 _atom_site_aniso_U_22
 _atom_site_aniso_U_33
 _atom_site_aniso_U_23
 _atom_site_aniso_U_13
 _atom_site_aniso_U_12
Au1 0.02257(18) 0.01475(18) 0.02079(17) -0.00241(14) 0.00051(14) 0.00107(14)
Au2 0.02337(19) 0.01572(18) 0.02027(17) -0.00212(13) 0.00412(14) -0.00111(14)
Cl1A 0.0395(14) 0.0132(10) 0.0243(10) -0.0025(8) 0.0041(9) -0.0001(9)
P1A 0.0173(10) 0.0145(10) 0.0165(9) -0.0025(8) -0.0018(8) 0.0014(8)
P2A 0.0172(10) 0.0185(11) 0.0180(10) -0.0029(8) 0.0007(8) -0.0005(9)
C1A 0.018(4) 0.021(5) 0.017(4) -0.004(3) 0.004(3) -0.006(4)
C2A 0.015(4) 0.017(4) 0.026(5) -0.002(3) -0.010(3) -0.005(3)
C3A 0.026(5) 0.019(5) 0.024(5) -0.003(4) 0.002(4) -0.008(4)
C4A 0.018(4) 0.017(4) 0.024(4) -0.004(3) 0.005(3) -0.001(4)
C5A 0.008(4) 0.020(5) 0.025(4) -0.004(3) 0.001(3) -0.001(3)
C6A 0.019(4) 0.014(4) 0.018(4) -0.003(3) -0.005(3) 0.003(3)
C7A 0.014(4) 0.021(5) 0.025(5) -0.001(4) -0.007(3) -0.001(4)
C8A 0.012(4) 0.024(5) 0.021(4) -0.002(3) -0.002(3) -0.001(3)
C9A 0.011(4) 0.006(4) 0.032(5) 0.002(3) -0.005(3) 0.000(3)
C10A 0.019(4) 0.025(5) 0.020(4) 0.003(4) 0.000(3) -0.002(4)
C11A 0.015(4) 0.030(6) 0.031(5) 0.003(4) -0.001(4) -0.001(4)
C12A 0.026(5) 0.018(5) 0.029(5) -0.003(4) -0.009(4) 0.005(4)
C13A 0.024(5) 0.012(4) 0.024(4) 0.001(3) 0.002(4) -0.003(4)
C14A 0.023(5) 0.025(5) 0.023(5) -0.003(4) 0.003(4) 0.001(4)
C15A 0.023(5) 0.026(5) 0.029(5) -0.002(4) -0.003(4) 0.002(4)
C16A 0.036(6) 0.018(5) 0.024(5) 0.000(4) 0.001(4) 0.010(4)
C17A 0.026(5) 0.017(5) 0.029(5) 0.011(4) 0.009(4) -0.006(4)
C18A 0.013(4) 0.029(5) 0.019(4) -0.002(4) -0.001(3) 0.000(4)
C19A 0.009(4) 0.019(5) 0.024(4) 0.003(3) 0.002(3) 0.000(3)
C20A 0.020(5) 0.017(5) 0.028(5) -0.003(4) 0.010(4) -0.001(4)
C21A 0.020(5) 0.016(5) 0.041(6) 0.003(4) 0.003(4) -0.001(4)
C22A 0.025(5) 0.030(6) 0.022(5) 0.004(4) 0.001(4) -0.004(4)
C23A 0.021(5) 0.027(5) 0.035(5) 0.000(4) 0.008(4) 0.010(4)
C24A 0.025(5) 0.023(5) 0.028(5) -0.005(4) 0.001(4) 0.012(4)
C25A 0.030(5) 0.025(5) 0.014(4) -0.003(3) 0.006(3) -0.006(4)
C26A 0.022(5) 0.012(4) 0.026(5) 0.007(3) -0.005(3) 0.000(3)
C27A 0.027(5) 0.016(4) 0.024(5) 0.001(3) -0.002(4) -0.001(4)
C28A 0.018(5) 0.026(5) 0.027(5) -0.002(4) -0.004(4) -0.008(4)
C29A 0.020(5) 0.021(5) 0.027(5) -0.005(4) -0.005(4) -0.004(4)
C30A 0.025(5) 0.011(4) 0.027(5) -0.005(3) 0.002(4) -0.003(3)
C31A 0.027(5) 0.026(5) 0.021(4) -0.006(4) 0.008(4) 0.000(4)
C32A 0.023(5) 0.017(5) 0.031(5) 0.000(4) 0.001(4) 0.001(4)
C33A 0.027(5) 0.024(5) 0.028(5) 0.002(4) 0.001(4) 0.003(4)
C34A 0.045(6) 0.025(5) 0.016(4) -0.004(4) -0.003(4) 0.004(5)
C35A 0.035(6) 0.039(6) 0.019(5) -0.010(4) -0.004(4) -0.009(5)
C36A 0.041(6) 0.038(7) 0.021(5) -0.011(4) 0.003(4) -0.015(5)
O1A 0.012(3) 0.019(3) 0.023(3) 0.000(2) 0.004(2) 0.008(2)
Au3 0.0347(2) 0.01597(19) 0.02289(19) 0.00003(14) -0.00468(16) 0.00053(16)
Au4 0.0433(2) 0.01643(19) 0.02279(19) 0.00233(15) -0.00365(16) -0.00038(17)
Cl1B 0.088(2) 0.0136(11) 0.0269(12) 0.0008(9) -0.0077(13) -0.0030(12)
P1B 0.0202(11) 0.0154(11) 0.0220(11) -0.0001(8) -0.0021(8) -0.0003(9)
P2B 0.0263(12) 0.0180(11) 0.0204(10) 0.0010(8) -0.0037(9) -0.0011(9)
C1B 0.008(4) 0.022(5) 0.026(4) -0.001(3) -0.004(3) -0.003(3)
C2B 0.009(4) 0.017(4) 0.030(5) 0.000(4) 0.003(3) 0.002(3)
C3B 0.036(6) 0.015(5) 0.023(5) 0.008(4) -0.001(4) -0.003(4)
C4B 0.021(5) 0.024(5) 0.047(6) -0.003(4) 0.010(4) -0.002(4)
C5B 0.022(5) 0.025(5) 0.039(6) -0.001(4) 0.001(4) 0.000(4)
C6B 0.020(5) 0.013(4) 0.035(5) 0.001(4) -0.003(4) -0.007(4)
C7B 0.026(5) 0.019(5) 0.038(6) 0.008(4) -0.007(4) -0.002(4)
C8B 0.015(4) 0.019(4) 0.029(4) 0.002(3) -0.010(3) -0.010(3)
C9B 0.016(4) 0.016(4) 0.034(5) 0.002(4) -0.004(4) -0.011(4)
C10B 0.026(5) 0.027(5) 0.028(5) -0.002(4) -0.003(4) -0.004(4)
C11B 0.025(5) 0.015(5) 0.049(7) 0.008(4) -0.016(5) -0.002(4)
C12B 0.028(5) 0.026(5) 0.038(6) 0.001(4) -0.008(4) -0.001(4)
C13B 0.023(5) 0.019(5) 0.022(4) 0.000(4) -0.010(4) -0.001(4)
C14B 0.030(6) 0.027(6) 0.027(5) 0.002(4) -0.002(4) -0.013(4)
C15B 0.026(5) 0.026(6) 0.044(6) 0.008(5) 0.000(4) 0.001(4)
C16B 0.039(6) 0.023(5) 0.025(5) 0.002(4) 0.005(4) 0.007(4)
C17B 0.027(5) 0.024(5) 0.026(5) -0.004(4) -0.004(4) 0.003(4)
C18B 0.035(6) 0.017(5) 0.020(5) -0.002(4) -0.003(4) 0.004(4)
C19B 0.032(5) 0.024(5) 0.021(5) -0.001(4) 0.003(4) -0.006(4)
C20B 0.023(5) 0.035(6) 0.033(5) 0.004(4) -0.001(4) -0.005(4)
C21B 0.025(5) 0.034(6) 0.036(6) -0.001(5) 0.002(4) 0.010(5)
C22B 0.026(5) 0.043(7) 0.029(5) -0.004(5) -0.003(4) 0.004(5)
C23B 0.027(5) 0.019(5) 0.040(6) -0.001(4) -0.003(4) -0.007(4)
C24B 0.011(4) 0.021(5) 0.042(6) -0.001(4) -0.002(4) -0.004(4)
C25B 0.031(5) 0.024(5) 0.024(5) -0.002(4) -0.004(4) 0.004(4)
C26B 0.037(6) 0.024(6) 0.040(6) -0.007(5) 0.007(5) -0.005(5)
C27B 0.064(9) 0.031(6) 0.032(6) -0.014(5) -0.008(6) -0.012(6)
C28B 0.064(8) 0.024(6) 0.020(5) -0.004(4) -0.015(5) 0.009(5)
C29B 0.068(9) 0.049(8) 0.012(5) 0.009(5) -0.009(5) -0.015(7)
C30B 0.055(8) 0.021(5) 0.036(6) 0.000(4) -0.011(5) -0.014(5)
C31B 0.023(5) 0.028(5) 0.015(4) -0.001(3) -0.004(3) 0.001(4)
C32B 0.026(5) 0.018(5) 0.033(5) 0.000(4) -0.010(4) -0.001(4)
C33B 0.034(6) 0.029(6) 0.031(5) 0.001(4) -0.001(4) -0.005(5)
C34B 0.021(5) 0.039(6) 0.041(6) -0.006(5) -0.007(4) -0.002(5)
C35B 0.027(6) 0.053(8) 0.044(7) -0.016(6) -0.010(5) 0.019(5)
C36B 0.028(6) 0.029(6) 0.032(5) 0.004(4) -0.006(4) 0.007(4)
O1B 0.019(3) 0.022(3) 0.025(3) 0.001(3) -0.002(2) -0.001(2)
Sb1 0.0218(3) 0.0167(3) 0.0195(3) -0.0002(2) -0.0004(2) -0.0009(2)
F1 0.036(4) 0.085(7) 0.049(5) -0.035(4) -0.001(3) -0.023(4)
F2 0.032(3) 0.048(4) 0.038(4) 0.007(3) -0.001(3) -0.011(3)
F3 0.068(6) 0.077(6) 0.033(4) -0.016(4) 0.001(4) -0.039(5)
F4 0.036(4) 0.035(4) 0.026(3) 0.004(2) 0.004(2) -0.004(3)
F5 0.035(4) 0.037(4) 0.089(7) 0.017(4) 0.006(4) 0.010(3)
F6 0.060(5) 0.045(5) 0.081(6) 0.019(4) 0.024(5) 0.027(4)
Sb2 0.0260(3) 0.0152(3) 0.0235(3) -0.0029(2) -0.0040(2) -0.0026(2)
F7 0.049(4) 0.036(4) 0.049(4) -0.016(3) -0.015(3) -0.008(3)
F8 0.053(5) 0.050(5) 0.034(4) 0.004(3) 0.003(3) -0.024(4)
F9 0.042(4) 0.030(3) 0.037(3) -0.007(3) -0.011(3) -0.013(3)
F10 0.044(4) 0.050(4) 0.033(3) -0.005(3) 0.011(3) 0.002(3)
F11 0.059(5) 0.020(3) 0.068(5) -0.003(3) -0.035(4) 0.013(3)
F12 0.038(4) 0.025(3) 0.052(4) -0.005(3) -0.006(3) 0.006(3)
 
_geom_special_details
;
 All esds (except the esd in the dihedral angle between two l.s. planes)
 are estimated using the full covariance matrix.  The cell esds are taken
 into account individually in the estimation of esds in distances, angles
 and torsion angles; correlations between esds in cell parameters are only
 used when they are defined by crystal symmetry.  An approximate (isotropic)
 treatment of cell esds is used for estimating esds involving l.s. planes.
;
 
loop_
 _geom_bond_atom_site_label_1
 _geom_bond_atom_site_label_2
 _geom_bond_distance
 _geom_bond_site_symmetry_2
 _geom_bond_publ_flag
Au1 P1A 2.236(2) . ?
Au1 Cl1A 2.353(2) . ?
Au1 Au2 2.9871(5) . ?
Au2 P2A 2.236(2) . ?
Au2 Cl1A 2.353(2) . ?
P1A C13A 1.802(10) . ?
P1A C2A 1.816(10) . ?
P1A C19A 1.817(9) . ?
P2A C25A 1.807(10) . ?
P2A C31A 1.820(10) . ?
P2A C9A 1.821(9) . ?
C1A O1A 1.377(10) . ?
C1A C2A 1.387(13) . ?
C1A C6A 1.406(13) . ?
C2A C3A 1.391(13) . ?
C3A C4A 1.401(14) . ?
C3A H3A 0.9500 . ?
C4A C5A 1.378(13) . ?
C4A H4A 0.9500 . ?
C5A C6A 1.403(12) . ?
C5A H5A 0.9500 . ?
C6A C7A 1.443(13) . ?
C7A C8A 1.384(13) . ?
C7A C12A 1.410(13) . ?
C8A O1A 1.387(11) . ?
C8A C9A 1.408(13) . ?
C9A C10A 1.378(13) . ?
C10A C11A 1.405(14) . ?
C10A H10A 0.9500 . ?
C11A C12A 1.377(15) . ?
C11A H11A 0.9500 . ?
C12A H12A 0.9500 . ?
C13A C14A 1.396(14) . ?
C13A C18A 1.409(13) . ?
C14A C15A 1.380(14) . ?
C14A H14A 0.9500 . ?
C15A C16A 1.377(15) . ?
C15A H15A 0.9500 . ?
C16A C17A 1.396(15) . ?
C16A H16A 0.9500 . ?
C17A C18A 1.378(14) . ?
C17A H17A 0.9500 . ?
C18A H18A 0.9500 . ?
C19A C24A 1.374(12) . ?
C19A C20A 1.384(13) . ?
C20A C21A 1.386(13) . ?
C20A H20A 0.9500 . ?
C21A C22A 1.395(14) . ?
C21A H21A 0.9500 . ?
C22A C23A 1.376(15) . ?
C22A H22A 0.9500 . ?
C23A C24A 1.403(15) . ?
C23A H23A 0.9500 . ?
C24A H24A 0.9500 . ?
C25A C30A 1.375(15) . ?
C25A C26A 1.417(13) . ?
C26A C27A 1.386(14) . ?
C26A H26A 0.9500 . ?
C27A C28A 1.387(14) . ?
C27A H27A 0.9500 . ?
C28A C29A 1.389(14) . ?
C28A H28A 0.9500 . ?
C29A C30A 1.412(13) . ?
C29A H29A 0.9500 . ?
C30A H30A 0.9500 . ?
C31A C36A 1.387(15) . ?
C31A C32A 1.395(13) . ?
C32A C33A 1.387(15) . ?
C32A H32A 0.9500 . ?
C33A C34A 1.388(16) . ?
C33A H33A 0.9500 . ?
C34A C35A 1.400(15) . ?
C34A H34A 0.9500 . ?
C35A C36A 1.386(14) . ?
C35A H35A 0.9500 . ?
C36A H36A 0.9500 . ?
Au3 P1B 2.238(2) . ?
Au3 Cl1B 2.360(3) . ?
Au3 Au4 2.9774(6) . ?
Au4 P2B 2.236(2) . ?
Au4 Cl1B 2.351(3) . ?
P1B C2B 1.804(9) . ?
P1B C19B 1.812(11) . ?
P1B C13B 1.816(10) . ?
P2B C25B 1.798(10) . ?
P2B C31B 1.811(11) . ?
P2B C9B 1.824(10) . ?
C1B O1B 1.356(11) . ?
C1B C2B 1.390(13) . ?
C1B C6B 1.410(13) . ?
C2B C3B 1.401(13) . ?
C3B C4B 1.401(15) . ?
C3B H3B 0.9500 . ?
C4B C5B 1.386(17) . ?
C4B H4B 0.9500 . ?
C5B C6B 1.406(14) . ?
C5B H5B 0.9500 . ?
C6B C7B 1.417(16) . ?
C7B C8B 1.372(15) . ?
C7B C12B 1.421(14) . ?
C8B O1B 1.377(11) . ?
C8B C9B 1.384(15) . ?
C9B C10B 1.378(14) . ?
C10B C11B 1.428(15) . ?
C10B H10B 0.9500 . ?
C11B C12B 1.389(17) . ?
C11B H11B 0.9500 . ?
C12B H12B 0.9500 . ?
C13B C18B 1.391(14) . ?
C13B C14B 1.402(14) . ?
C14B C15B 1.369(16) . ?
C14B H14B 0.9500 . ?
C15B C16B 1.415(16) . ?
C15B H15B 0.9500 . ?
C16B C17B 1.352(16) . ?
C16B H16B 0.9500 . ?
C17B C18B 1.408(14) . ?
C17B H17B 0.9500 . ?
C18B H18B 0.9500 . ?
C19B C24B 1.369(15) . ?
C19B C20B 1.372(16) . ?
C20B C21B 1.369(16) . ?
C20B H20B 0.9500 . ?
C21B C22B 1.359(17) . ?
C21B H21B 0.9500 . ?
C22B C23B 1.368(15) . ?
C22B H22B 0.9500 . ?
C23B C24B 1.400(14) . ?
C23B H23B 0.9500 . ?
C24B H24B 0.9500 . ?
C25B C30B 1.390(17) . ?
C25B C26B 1.417(16) . ?
C26B C27B 1.398(17) . ?
C26B H26B 0.9500 . ?
C27B C28B 1.360(19) . ?
C27B H27B 0.9500 . ?
C28B C29B 1.395(18) . ?
C28B H28B 0.9500 . ?
C29B C30B 1.382(16) . ?
C29B H29B 0.9500 . ?
C30B H30B 0.9500 . ?
C31B C32B 1.388(14) . ?
C31B C36B 1.406(14) . ?
C32B C33B 1.409(15) . ?
C32B H32B 0.9500 . ?
C33B C34B 1.341(16) . ?
C33B H33B 0.9500 . ?
C34B C35B 1.393(18) . ?
C34B H34B 0.9500 . ?
C35B C36B 1.393(18) . ?
C35B H35B 0.9500 . ?
C36B H36B 0.9500 . ?
Sb1 F6 1.845(8) . ?
Sb1 F1 1.846(7) . ?
Sb1 F3 1.861(7) . ?
Sb1 F5 1.869(7) . ?
Sb1 F2 1.877(7) . ?
Sb1 F4 1.879(6) . ?
Sb2 F8 1.856(7) . ?
Sb2 F10 1.865(7) . ?
Sb2 F11 1.866(7) . ?
Sb2 F9 1.875(6) . ?
Sb2 F7 1.880(7) . ?
Sb2 F12 1.883(7) . ?
 
loop_
 _geom_angle_atom_site_label_1
 _geom_angle_atom_site_label_2
 _geom_angle_atom_site_label_3
 _geom_angle
 _geom_angle_site_symmetry_1
 _geom_angle_site_symmetry_3
 _geom_angle_publ_flag
P1A Au1 Cl1A 172.20(8) . . ?
P1A Au1 Au2 122.97(6) . . ?
Cl1A Au1 Au2 50.61(6) . . ?
P2A Au2 Cl1A 174.13(9) . . ?
P2A Au2 Au1 124.58(6) . . ?
Cl1A Au2 Au1 50.60(5) . . ?
Au1 Cl1A Au2 78.79(7) . . ?
C13A P1A C2A 104.5(5) . . ?
C13A P1A C19A 106.4(4) . . ?
C2A P1A C19A 105.6(4) . . ?
C13A P1A Au1 116.0(3) . . ?
C2A P1A Au1 113.2(3) . . ?
C19A P1A Au1 110.4(3) . . ?
C25A P2A C31A 109.2(4) . . ?
C25A P2A C9A 104.3(4) . . ?
C31A P2A C9A 106.7(5) . . ?
C25A P2A Au2 108.3(4) . . ?
C31A P2A Au2 114.1(4) . . ?
C9A P2A Au2 113.7(3) . . ?
O1A C1A C2A 123.2(9) . . ?
O1A C1A C6A 112.6(8) . . ?
C2A C1A C6A 124.2(8) . . ?
C1A C2A C3A 115.8(9) . . ?
C1A C2A P1A 119.8(7) . . ?
C3A C2A P1A 123.9(7) . . ?
C2A C3A C4A 121.2(9) . . ?
C2A C3A H3A 119.4 . . ?
C4A C3A H3A 119.4 . . ?
C5A C4A C3A 122.1(8) . . ?
C5A C4A H4A 118.9 . . ?
C3A C4A H4A 118.9 . . ?
C4A C5A C6A 118.1(8) . . ?
C4A C5A H5A 120.9 . . ?
C6A C5A H5A 120.9 . . ?
C5A C6A C1A 118.5(8) . . ?
C5A C6A C7A 137.0(9) . . ?
C1A C6A C7A 104.5(8) . . ?
C8A C7A C12A 117.6(9) . . ?
C8A C7A C6A 106.3(8) . . ?
C12A C7A C6A 136.1(9) . . ?
C7A C8A O1A 112.2(8) . . ?
C7A C8A C9A 123.9(9) . . ?
O1A C8A C9A 123.9(8) . . ?
C10A C9A C8A 116.7(8) . . ?
C10A C9A P2A 125.1(8) . . ?
C8A C9A P2A 117.9(7) . . ?
C9A C10A C11A 121.0(9) . . ?
C9A C10A H10A 119.5 . . ?
C11A C10A H10A 119.5 . . ?
C12A C11A C10A 121.0(10) . . ?
C12A C11A H11A 119.5 . . ?
C10A C11A H11A 119.5 . . ?
C11A C12A C7A 119.8(9) . . ?
C11A C12A H12A 120.1 . . ?
C7A C12A H12A 120.1 . . ?
C14A C13A C18A 118.3(9) . . ?
C14A C13A P1A 121.8(7) . . ?
C18A C13A P1A 119.8(7) . . ?
C15A C14A C13A 120.2(10) . . ?
C15A C14A H14A 119.9 . . ?
C13A C14A H14A 119.9 . . ?
C16A C15A C14A 121.2(10) . . ?
C16A C15A H15A 119.4 . . ?
C14A C15A H15A 119.4 . . ?
C15A C16A C17A 119.4(10) . . ?
C15A C16A H16A 120.3 . . ?
C17A C16A H16A 120.3 . . ?
C18A C17A C16A 119.9(9) . . ?
C18A C17A H17A 120.0 . . ?
C16A C17A H17A 120.0 . . ?
C17A C18A C13A 120.8(9) . . ?
C17A C18A H18A 119.6 . . ?
C13A C18A H18A 119.6 . . ?
C24A C19A C20A 120.6(9) . . ?
C24A C19A P1A 118.5(8) . . ?
C20A C19A P1A 120.9(7) . . ?
C19A C20A C21A 119.7(9) . . ?
C19A C20A H20A 120.2 . . ?
C21A C20A H20A 120.2 . . ?
C20A C21A C22A 120.5(9) . . ?
C20A C21A H21A 119.7 . . ?
C22A C21A H21A 119.7 . . ?
C23A C22A C21A 119.0(9) . . ?
C23A C22A H22A 120.5 . . ?
C21A C22A H22A 120.5 . . ?
C22A C23A C24A 120.8(9) . . ?
C22A C23A H23A 119.6 . . ?
C24A C23A H23A 119.6 . . ?
C19A C24A C23A 119.3(9) . . ?
C19A C24A H24A 120.4 . . ?
C23A C24A H24A 120.4 . . ?
C30A C25A C26A 120.2(9) . . ?
C30A C25A P2A 118.3(8) . . ?
C26A C25A P2A 121.5(8) . . ?
C27A C26A C25A 119.1(9) . . ?
C27A C26A H26A 120.5 . . ?
C25A C26A H26A 120.5 . . ?
C26A C27A C28A 121.0(9) . . ?
C26A C27A H27A 119.5 . . ?
C28A C27A H27A 119.5 . . ?
C27A C28A C29A 119.9(9) . . ?
C27A C28A H28A 120.1 . . ?
C29A C28A H28A 120.1 . . ?
C28A C29A C30A 119.8(9) . . ?
C28A C29A H29A 120.1 . . ?
C30A C29A H29A 120.1 . . ?
C25A C30A C29A 119.9(9) . . ?
C25A C30A H30A 120.0 . . ?
C29A C30A H30A 120.0 . . ?
C36A C31A C32A 121.8(9) . . ?
C36A C31A P2A 116.4(7) . . ?
C32A C31A P2A 121.7(8) . . ?
C33A C32A C31A 119.1(10) . . ?
C33A C32A H32A 120.4 . . ?
C31A C32A H32A 120.4 . . ?
C32A C33A C34A 119.9(10) . . ?
C32A C33A H33A 120.0 . . ?
C34A C33A H33A 120.0 . . ?
C33A C34A C35A 120.2(9) . . ?
C33A C34A H34A 119.9 . . ?
C35A C34A H34A 119.9 . . ?
C36A C35A C34A 120.5(10) . . ?
C36A C35A H35A 119.7 . . ?
C34A C35A H35A 119.7 . . ?
C35A C36A C31A 118.4(10) . . ?
C35A C36A H36A 120.8 . . ?
C31A C36A H36A 120.8 . . ?
C1A O1A C8A 104.4(7) . . ?
P1B Au3 Cl1B 176.85(9) . . ?
P1B Au3 Au4 126.24(6) . . ?
Cl1B Au3 Au4 50.66(6) . . ?
P2B Au4 Cl1B 171.93(9) . . ?
P2B Au4 Au3 121.05(7) . . ?
Cl1B Au4 Au3 50.94(6) . . ?
Au4 Cl1B Au3 78.40(8) . . ?
C2B P1B C19B 104.2(5) . . ?
C2B P1B C13B 106.2(5) . . ?
C19B P1B C13B 109.2(5) . . ?
C2B P1B Au3 111.4(3) . . ?
C19B P1B Au3 112.3(3) . . ?
C13B P1B Au3 113.0(3) . . ?
C25B P2B C31B 106.5(5) . . ?
C25B P2B C9B 106.7(5) . . ?
C31B P2B C9B 104.6(4) . . ?
C25B P2B Au4 116.3(4) . . ?
C31B P2B Au4 111.4(3) . . ?
C9B P2B Au4 110.5(3) . . ?
O1B C1B C2B 125.2(8) . . ?
O1B C1B C6B 110.9(8) . . ?
C2B C1B C6B 123.9(9) . . ?
C1B C2B C3B 117.0(8) . . ?
C1B C2B P1B 118.2(7) . . ?
C3B C2B P1B 124.6(8) . . ?
C4B C3B C2B 120.1(9) . . ?
C4B C3B H3B 120.0 . . ?
C2B C3B H3B 120.0 . . ?
C5B C4B C3B 122.3(10) . . ?
C5B C4B H4B 118.9 . . ?
C3B C4B H4B 118.9 . . ?
C4B C5B C6B 118.8(10) . . ?
C4B C5B H5B 120.6 . . ?
C6B C5B H5B 120.6 . . ?
C5B C6B C1B 117.9(10) . . ?
C5B C6B C7B 136.7(10) . . ?
C1B C6B C7B 105.5(9) . . ?
C8B C7B C6B 106.3(9) . . ?
C8B C7B C12B 117.2(11) . . ?
C6B C7B C12B 136.5(11) . . ?
C7B C8B O1B 111.6(9) . . ?
C7B C8B C9B 125.3(10) . . ?
O1B C8B C9B 123.1(9) . . ?
C10B C9B C8B 117.8(10) . . ?
C10B C9B P2B 122.4(8) . . ?
C8B C9B P2B 119.8(8) . . ?
C9B C10B C11B 119.4(10) . . ?
C9B C10B H10B 120.3 . . ?
C11B C10B H10B 120.3 . . ?
C12B C11B C10B 121.3(10) . . ?
C12B C11B H11B 119.4 . . ?
C10B C11B H11B 119.4 . . ?
C11B C12B C7B 119.1(11) . . ?
C11B C12B H12B 120.5 . . ?
C7B C12B H12B 120.5 . . ?
C18B C13B C14B 119.7(9) . . ?
C18B C13B P1B 122.3(8) . . ?
C14B C13B P1B 117.9(7) . . ?
C15B C14B C13B 120.4(10) . . ?
C15B C14B H14B 119.8 . . ?
C13B C14B H14B 119.8 . . ?
C14B C15B C16B 120.1(10) . . ?
C14B C15B H15B 119.9 . . ?
C16B C15B H15B 119.9 . . ?
C17B C16B C15B 118.9(10) . . ?
C17B C16B H16B 120.5 . . ?
C15B C16B H16B 120.5 . . ?
C16B C17B C18B 122.1(10) . . ?
C16B C17B H17B 118.9 . . ?
C18B C17B H17B 118.9 . . ?
C13B C18B C17B 118.5(10) . . ?
C13B C18B H18B 120.8 . . ?
C17B C18B H18B 120.8 . . ?
C24B C19B C20B 118.3(10) . . ?
C24B C19B P1B 120.9(8) . . ?
C20B C19B P1B 120.7(9) . . ?
C21B C20B C19B 122.0(11) . . ?
C21B C20B H20B 119.0 . . ?
C19B C20B H20B 119.0 . . ?
C22B C21B C20B 119.1(11) . . ?
C22B C21B H21B 120.4 . . ?
C20B C21B H21B 120.4 . . ?
C21B C22B C23B 121.0(11) . . ?
C21B C22B H22B 119.5 . . ?
C23B C22B H22B 119.5 . . ?
C22B C23B C24B 118.9(10) . . ?
C22B C23B H23B 120.5 . . ?
C24B C23B H23B 120.5 . . ?
C19B C24B C23B 120.5(10) . . ?
C19B C24B H24B 119.7 . . ?
C23B C24B H24B 119.7 . . ?
C30B C25B C26B 119.5(10) . . ?
C30B C25B P2B 121.4(9) . . ?
C26B C25B P2B 119.0(9) . . ?
C27B C26B C25B 117.6(11) . . ?
C27B C26B H26B 121.2 . . ?
C25B C26B H26B 121.2 . . ?
C28B C27B C26B 122.2(12) . . ?
C28B C27B H27B 118.9 . . ?
C26B C27B H27B 118.9 . . ?
C27B C28B C29B 120.3(11) . . ?
C27B C28B H28B 119.9 . . ?
C29B C28B H28B 119.9 . . ?
C30B C29B C28B 119.0(12) . . ?
C30B C29B H29B 120.5 . . ?
C28B C29B H29B 120.5 . . ?
C29B C30B C25B 121.4(12) . . ?
C29B C30B H30B 119.3 . . ?
C25B C30B H30B 119.3 . . ?
C32B C31B C36B 120.4(10) . . ?
C32B C31B P2B 120.4(8) . . ?
C36B C31B P2B 119.1(8) . . ?
C31B C32B C33B 119.3(10) . . ?
C31B C32B H32B 120.3 . . ?
C33B C32B H32B 120.3 . . ?
C34B C33B C32B 119.8(11) . . ?
C34B C33B H33B 120.1 . . ?
C32B C33B H33B 120.1 . . ?
C33B C34B C35B 122.2(11) . . ?
C33B C34B H34B 118.9 . . ?
C35B C34B H34B 118.9 . . ?
C34B C35B C36B 119.3(10) . . ?
C34B C35B H35B 120.4 . . ?
C36B C35B H35B 120.4 . . ?
C35B C36B C31B 118.9(10) . . ?
C35B C36B H36B 120.5 . . ?
C31B C36B H36B 120.5 . . ?
C1B O1B C8B 105.8(7) . . ?
F6 Sb1 F1 90.0(5) . . ?
F6 Sb1 F3 89.0(5) . . ?
F1 Sb1 F3 178.7(4) . . ?
F6 Sb1 F5 177.4(4) . . ?
F1 Sb1 F5 90.9(4) . . ?
F3 Sb1 F5 90.0(5) . . ?
F6 Sb1 F2 90.5(4) . . ?
F1 Sb1 F2 90.6(3) . . ?
F3 Sb1 F2 90.2(3) . . ?
F5 Sb1 F2 91.9(3) . . ?
F6 Sb1 F4 88.0(3) . . ?
F1 Sb1 F4 89.9(3) . . ?
F3 Sb1 F4 89.3(3) . . ?
F5 Sb1 F4 89.6(3) . . ?
F2 Sb1 F4 178.4(3) . . ?
F8 Sb2 F10 177.2(4) . . ?
F8 Sb2 F11 91.9(4) . . ?
F10 Sb2 F11 90.5(4) . . ?
F8 Sb2 F9 89.5(3) . . ?
F10 Sb2 F9 89.2(3) . . ?
F11 Sb2 F9 90.2(3) . . ?
F8 Sb2 F7 90.1(3) . . ?
F10 Sb2 F7 91.1(3) . . ?
F11 Sb2 F7 90.7(3) . . ?
F9 Sb2 F7 179.0(3) . . ?
F8 Sb2 F12 89.8(4) . . ?
F10 Sb2 F12 87.7(3) . . ?
F11 Sb2 F12 178.1(4) . . ?
F9 Sb2 F12 89.1(3) . . ?
F7 Sb2 F12 90.0(3) . . ?
 
loop_
 _geom_torsion_atom_site_label_1
 _geom_torsion_atom_site_label_2
 _geom_torsion_atom_site_label_3
 _geom_torsion_atom_site_label_4
 _geom_torsion
 _geom_torsion_site_symmetry_1
 _geom_torsion_site_symmetry_2
 _geom_torsion_site_symmetry_3
 _geom_torsion_site_symmetry_4
 _geom_torsion_publ_flag
O1A C1A C2A C3A -176.2(8) . . . . ?
C6A C1A C2A C3A 1.0(14) . . . . ?
O1A C1A C2A P1A -3.4(13) . . . . ?
C6A C1A C2A P1A 173.7(7) . . . . ?
C13A P1A C2A C1A 173.6(8) . . . . ?
C19A P1A C2A C1A -74.4(8) . . . . ?
Au1 P1A C2A C1A 46.5(8) . . . . ?
C13A P1A C2A C3A -14.3(9) . . . . ?
C19A P1A C2A C3A 97.7(9) . . . . ?
Au1 P1A C2A C3A -141.4(7) . . . . ?
C1A C2A C3A C4A -1.1(14) . . . . ?
P1A C2A C3A C4A -173.5(7) . . . . ?
C2A C3A C4A C5A 0.7(15) . . . . ?
C3A C4A C5A C6A 0.0(14) . . . . ?
C4A C5A C6A C1A -0.2(13) . . . . ?
C4A C5A C6A C7A 177.1(11) . . . . ?
O1A C1A C6A C5A 177.1(8) . . . . ?
C2A C1A C6A C5A -0.3(14) . . . . ?
O1A C1A C6A C7A -1.0(11) . . . . ?
C2A C1A C6A C7A -178.4(9) . . . . ?
C5A C6A C7A C8A -177.3(11) . . . . ?
C1A C6A C7A C8A 0.2(10) . . . . ?
C5A C6A C7A C12A 2(2) . . . . ?
C1A C6A C7A C12A 179.9(11) . . . . ?
C12A C7A C8A O1A -179.1(9) . . . . ?
C6A C7A C8A O1A 0.6(11) . . . . ?
C12A C7A C8A C9A -1.7(15) . . . . ?
C6A C7A C8A C9A 178.1(9) . . . . ?
C7A C8A C9A C10A 1.2(14) . . . . ?
O1A C8A C9A C10A 178.3(9) . . . . ?
C7A C8A C9A P2A -173.1(8) . . . . ?
O1A C8A C9A P2A 4.0(13) . . . . ?
C25A P2A C9A C10A -102.5(9) . . . . ?
C31A P2A C9A C10A 12.9(9) . . . . ?
Au2 P2A C9A C10A 139.7(7) . . . . ?
C25A P2A C9A C8A 71.2(8) . . . . ?
C31A P2A C9A C8A -173.3(7) . . . . ?
Au2 P2A C9A C8A -46.6(8) . . . . ?
C8A C9A C10A C11A -0.2(14) . . . . ?
P2A C9A C10A C11A 173.7(7) . . . . ?
C9A C10A C11A C12A -0.2(16) . . . . ?
C10A C11A C12A C7A -0.4(16) . . . . ?
C8A C7A C12A C11A 1.3(15) . . . . ?
C6A C7A C12A C11A -178.4(11) . . . . ?
C2A P1A C13A C14A 110.5(9) . . . . ?
C19A P1A C13A C14A -0.9(10) . . . . ?
Au1 P1A C13A C14A -124.1(8) . . . . ?
C2A P1A C13A C18A -71.4(9) . . . . ?
C19A P1A C13A C18A 177.1(8) . . . . ?
Au1 P1A C13A C18A 53.9(9) . . . . ?
C18A C13A C14A C15A 0.4(15) . . . . ?
P1A C13A C14A C15A 178.5(8) . . . . ?
C13A C14A C15A C16A 1.4(16) . . . . ?
C14A C15A C16A C17A -1.6(15) . . . . ?
C15A C16A C17A C18A -0.2(15) . . . . ?
C16A C17A C18A C13A 2.1(15) . . . . ?
C14A C13A C18A C17A -2.2(15) . . . . ?
P1A C13A C18A C17A 179.7(8) . . . . ?
C13A P1A C19A C24A -98.6(8) . . . . ?
C2A P1A C19A C24A 150.7(8) . . . . ?
Au1 P1A C19A C24A 28.1(9) . . . . ?
C13A P1A C19A C20A 80.0(9) . . . . ?
C2A P1A C19A C20A -30.7(9) . . . . ?
Au1 P1A C19A C20A -153.4(7) . . . . ?
C24A C19A C20A C21A 1.3(16) . . . . ?
P1A C19A C20A C21A -177.2(8) . . . . ?
C19A C20A C21A C22A 1.5(16) . . . . ?
C20A C21A C22A C23A -1.0(17) . . . . ?
C21A C22A C23A C24A -2.4(16) . . . . ?
C20A C19A C24A C23A -4.6(15) . . . . ?
P1A C19A C24A C23A 174.0(8) . . . . ?
C22A C23A C24A C19A 5.1(16) . . . . ?
C31A P2A C25A C30A 75.9(9) . . . . ?
C9A P2A C25A C30A -170.4(8) . . . . ?
Au2 P2A C25A C30A -49.0(8) . . . . ?
C31A P2A C25A C26A -107.8(8) . . . . ?
C9A P2A C25A C26A 5.9(9) . . . . ?
Au2 P2A C25A C26A 127.4(7) . . . . ?
C30A C25A C26A C27A -1.0(14) . . . . ?
P2A C25A C26A C27A -177.2(7) . . . . ?
C25A C26A C27A C28A -0.9(14) . . . . ?
C26A C27A C28A C29A 0.1(15) . . . . ?
C27A C28A C29A C30A 2.6(15) . . . . ?
C26A C25A C30A C29A 3.6(14) . . . . ?
P2A C25A C30A C29A 180.0(7) . . . . ?
C28A C29A C30A C25A -4.4(15) . . . . ?
C25A P2A C31A C36A 174.3(9) . . . . ?
C9A P2A C31A C36A 62.1(10) . . . . ?
Au2 P2A C31A C36A -64.3(10) . . . . ?
C25A P2A C31A C32A -7.4(11) . . . . ?
C9A P2A C31A C32A -119.5(9) . . . . ?
Au2 P2A C31A C32A 114.0(9) . . . . ?
C36A C31A C32A C33A -0.2(17) . . . . ?
P2A C31A C32A C33A -178.5(8) . . . . ?
C31A C32A C33A C34A 0.1(16) . . . . ?
C32A C33A C34A C35A -0.2(16) . . . . ?
C33A C34A C35A C36A 0.5(18) . . . . ?
C34A C35A C36A C31A -0.7(19) . . . . ?
C32A C31A C36A C35A 0.5(18) . . . . ?
P2A C31A C36A C35A 178.8(10) . . . . ?
C2A C1A O1A C8A 178.8(9) . . . . ?
C6A C1A O1A C8A 1.4(10) . . . . ?
C7A C8A O1A C1A -1.2(10) . . . . ?
C9A C8A O1A C1A -178.6(9) . . . . ?
O1B C1B C2B C3B -178.9(9) . . . . ?
C6B C1B C2B C3B 2.1(14) . . . . ?
O1B C1B C2B P1B -4.2(13) . . . . ?
C6B C1B C2B P1B 176.9(8) . . . . ?
C19B P1B C2B C1B -74.5(8) . . . . ?
C13B P1B C2B C1B 170.3(7) . . . . ?
Au3 P1B C2B C1B 46.8(8) . . . . ?
C19B P1B C2B C3B 99.8(9) . . . . ?
C13B P1B C2B C3B -15.4(10) . . . . ?
Au3 P1B C2B C3B -138.8(8) . . . . ?
C1B C2B C3B C4B 0.8(14) . . . . ?
P1B C2B C3B C4B -173.6(8) . . . . ?
C2B C3B C4B C5B -3.0(16) . . . . ?
C3B C4B C5B C6B 2.2(16) . . . . ?
C4B C5B C6B C1B 0.6(15) . . . . ?
C4B C5B C6B C7B 178.2(12) . . . . ?
O1B C1B C6B C5B 178.1(8) . . . . ?
C2B C1B C6B C5B -2.8(15) . . . . ?
O1B C1B C6B C7B -0.2(11) . . . . ?
C2B C1B C6B C7B 178.9(9) . . . . ?
C5B C6B C7B C8B -178.0(11) . . . . ?
C1B C6B C7B C8B -0.2(11) . . . . ?
C5B C6B C7B C12B 4(2) . . . . ?
C1B C6B C7B C12B -178.4(12) . . . . ?
C6B C7B C8B O1B 0.5(12) . . . . ?
C12B C7B C8B O1B 179.2(9) . . . . ?
C6B C7B C8B C9B 178.7(9) . . . . ?
C12B C7B C8B C9B -2.6(15) . . . . ?
C7B C8B C9B C10B 2.6(15) . . . . ?
O1B C8B C9B C10B -179.4(9) . . . . ?
C7B C8B C9B P2B -174.1(8) . . . . ?
O1B C8B C9B P2B 3.9(13) . . . . ?
C25B P2B C9B C10B 4.8(10) . . . . ?
C31B P2B C9B C10B -107.9(9) . . . . ?
Au4 P2B C9B C10B 132.1(8) . . . . ?
C25B P2B C9B C8B -178.7(8) . . . . ?
C31B P2B C9B C8B 68.6(8) . . . . ?
Au4 P2B C9B C8B -51.4(8) . . . . ?
C8B C9B C10B C11B -1.9(15) . . . . ?
P2B C9B C10B C11B 174.7(8) . . . . ?
C9B C10B C11B C12B 1.6(16) . . . . ?
C10B C11B C12B C7B -1.6(17) . . . . ?
C8B C7B C12B C11B 2.1(16) . . . . ?
C6B C7B C12B C11B -179.8(12) . . . . ?
C2B P1B C13B C18B 119.4(9) . . . . ?
C19B P1B C13B C18B 7.6(10) . . . . ?
Au3 P1B C13B C18B -118.2(8) . . . . ?
C2B P1B C13B C14B -63.6(9) . . . . ?
C19B P1B C13B C14B -175.3(8) . . . . ?
Au3 P1B C13B C14B 58.8(9) . . . . ?
C18B C13B C14B C15B -3.5(17) . . . . ?
P1B C13B C14B C15B 179.4(9) . . . . ?
C13B C14B C15B C16B 4.8(18) . . . . ?
C14B C15B C16B C17B -4.4(17) . . . . ?
C15B C16B C17B C18B 2.7(16) . . . . ?
C14B C13B C18B C17B 1.7(15) . . . . ?
P1B C13B C18B C17B 178.7(8) . . . . ?
C16B C17B C18B C13B -1.4(16) . . . . ?
C2B P1B C19B C24B -7.6(10) . . . . ?
C13B P1B C19B C24B 105.5(9) . . . . ?
Au3 P1B C19B C24B -128.3(8) . . . . ?
C2B P1B C19B C20B 170.9(9) . . . . ?
C13B P1B C19B C20B -76.0(9) . . . . ?
Au3 P1B C19B C20B 50.1(9) . . . . ?
C24B C19B C20B C21B -0.6(17) . . . . ?
P1B C19B C20B C21B -179.1(9) . . . . ?
C19B C20B C21B C22B 1.2(18) . . . . ?
C20B C21B C22B C23B -0.7(18) . . . . ?
C21B C22B C23B C24B -0.4(18) . . . . ?
C20B C19B C24B C23B -0.5(16) . . . . ?
P1B C19B C24B C23B 178.0(8) . . . . ?
C22B C23B C24B C19B 1.0(17) . . . . ?
C31B P2B C25B C30B 5.3(11) . . . . ?
C9B P2B C25B C30B -106.1(10) . . . . ?
Au4 P2B C25B C30B 130.2(9) . . . . ?
C31B P2B C25B C26B -176.6(9) . . . . ?
C9B P2B C25B C26B 72.0(10) . . . . ?
Au4 P2B C25B C26B -51.8(10) . . . . ?
C30B C25B C26B C27B -0.6(18) . . . . ?
P2B C25B C26B C27B -178.7(10) . . . . ?
C25B C26B C27B C28B 1(2) . . . . ?
C26B C27B C28B C29B -2(2) . . . . ?
C27B C28B C29B C30B 1(2) . . . . ?
C28B C29B C30B C25B 0(2) . . . . ?
C26B C25B C30B C29B 0.0(19) . . . . ?
P2B C25B C30B C29B 178.1(11) . . . . ?
C25B P2B C31B C32B -83.4(9) . . . . ?
C9B P2B C31B C32B 29.4(9) . . . . ?
Au4 P2B C31B C32B 148.8(8) . . . . ?
C25B P2B C31B C36B 94.1(9) . . . . ?
C9B P2B C31B C36B -153.1(8) . . . . ?
Au4 P2B C31B C36B -33.7(9) . . . . ?
C36B C31B C32B C33B -1.7(16) . . . . ?
P2B C31B C32B C33B 175.7(8) . . . . ?
C31B C32B C33B C34B -0.4(17) . . . . ?
C32B C33B C34B C35B 1.4(19) . . . . ?
C33B C34B C35B C36B -0.2(19) . . . . ?
C34B C35B C36B C31B -1.9(18) . . . . ?
C32B C31B C36B C35B 2.9(16) . . . . ?
P2B C31B C36B C35B -174.6(9) . . . . ?
C2B C1B O1B C8B -178.5(9) . . . . ?
C6B C1B O1B C8B 0.5(10) . . . . ?
C7B C8B O1B C1B -0.6(10) . . . . ?
C9B C8B O1B C1B -178.9(9) . . . . ?
 
_refine_diff_density_max    1.215
_refine_diff_density_min   -1.204
_refine_diff_density_rms    0.234

_shelx_res_file
;

    xs0849a.res created by SHELXL-2014/7


TITL   xs0849a
CELL   1.54178    10.9408  13.9559  22.9525  88.5510  87.0440  89.5870
ZERR         2     0.0003   0.0004   0.0008   0.0030   0.0030   0.0020
LATT  1
SFAC C H O F P CL SB AU
UNIT 144 104 4 24 8 4 4 8
L.S.      5
FMAP      2
PLAN     25

TEMP -163

ACTA
HTAB
BOND
BOND $H
CONF
WPDB

L.S. 6
FMAP 2
PLAN 10
OMIT -2 143.8
OMIT     0  13  19
OMIT     4   4  25
OMIT     0  11   3
OMIT     1  13  -4
OMIT    4   4  26
OMIT  -4  -5  25
OMIT  -4  -5  24

MERG 0

rem restraints
RIGU 0.005 C1A O1A C8A
RIGU 0.005 C1B O1B C8B

rem EXTI    0.000000
WGHT    0.071600
BASF   0.43678
FVAR       1.44207
PART 0
rem Au-Au complex A
AU1   8    0.732238    0.551121    0.050862    11.00000    0.02257    0.01475 =
         0.02079   -0.00241    0.00051    0.00107
AU2   8    0.751265    0.554267    0.180156    11.00000    0.02337    0.01572 =
         0.02027   -0.00212    0.00412   -0.00111
CL1A  6    0.711602    0.681026    0.114096    11.00000    0.03951    0.01322 =
         0.02429   -0.00255    0.00409   -0.00012
P1A   5    0.739345    0.415827    0.000633    11.00000    0.01725    0.01447 =
         0.01651   -0.00252   -0.00179    0.00138
P2A   5    0.777619    0.424325    0.237276    11.00000    0.01716    0.01851 =
         0.01804   -0.00287    0.00069   -0.00054
C1A   1    0.923842    0.332465    0.064010    11.00000    0.01781    0.02131 =
         0.01740   -0.00425    0.00358   -0.00551
C2A   1    0.879824    0.347909    0.008919    11.00000    0.01492    0.01687 =
         0.02604   -0.00160   -0.00954   -0.00474
C3A   1    0.941107    0.299449   -0.036177    11.00000    0.02569    0.01913 =
         0.02411   -0.00349    0.00185   -0.00794
AFIX  43
H3A   2    0.913856    0.306506   -0.074694    11.00000   -1.20000
AFIX   0
C4A   1    1.042239    0.240444   -0.025863    11.00000    0.01794    0.01685 =
         0.02412   -0.00435    0.00505   -0.00105
AFIX  43
H4A   2    1.082430    0.209050   -0.057789    11.00000   -1.20000
AFIX   0
C5A   1    1.085303    0.226471    0.029098    11.00000    0.00813    0.01969 =
         0.02475   -0.00390    0.00112   -0.00136
AFIX  43
H5A   2    1.154005    0.186150    0.035261    11.00000   -1.20000
AFIX   0
C6A   1    1.024806    0.273484    0.075704    11.00000    0.01887    0.01419 =
         0.01786   -0.00314   -0.00515    0.00279
C7A   1    1.034079    0.277090    0.138079    11.00000    0.01433    0.02081 =
         0.02534   -0.00118   -0.00691   -0.00131
C8A   1    0.939977    0.336234    0.158373    11.00000    0.01204    0.02420 =
         0.02054   -0.00160   -0.00189   -0.00104
C9A   1    0.915428    0.356019    0.217701    11.00000    0.01063    0.00608 =
         0.03184    0.00244   -0.00493   -0.00040
C10A  1    0.992454    0.314372    0.256844    11.00000    0.01939    0.02459 =
         0.02046    0.00296   -0.00002   -0.00173
AFIX  43
H10A  2    0.979355    0.325945    0.297303    11.00000   -1.20000
AFIX   0
C11A  1    1.090073    0.255046    0.237793    11.00000    0.01531    0.02989 =
         0.03072    0.00296   -0.00076   -0.00055
AFIX  43
H11A  2    1.142128    0.227284    0.265563    11.00000   -1.20000
AFIX   0
C12A  1    1.111453    0.236524    0.179480    11.00000    0.02564    0.01782 =
         0.02931   -0.00315   -0.00895    0.00510
AFIX  43
H12A  2    1.178072    0.196573    0.167196    11.00000   -1.20000
AFIX   0
C13A  1    0.727194    0.429574   -0.077128    11.00000    0.02380    0.01213 =
         0.02399    0.00131    0.00246   -0.00275
C14A  1    0.637336    0.382541   -0.106414    11.00000    0.02254    0.02534 =
         0.02291   -0.00327    0.00294    0.00051
AFIX  43
H14A  2    0.581796    0.340785   -0.085381    11.00000   -1.20000
AFIX   0
C15A  1    0.628919    0.396497   -0.165801    11.00000    0.02344    0.02551 =
         0.02937   -0.00236   -0.00303    0.00239
AFIX  43
H15A  2    0.566174    0.365215   -0.185055    11.00000   -1.20000
AFIX   0
C16A  1    0.709745    0.454904   -0.197675    11.00000    0.03552    0.01802 =
         0.02396   -0.00004    0.00104    0.01041
AFIX  43
H16A  2    0.704097    0.462583   -0.238694    11.00000   -1.20000
AFIX   0
C17A  1    0.800081    0.502747   -0.169176    11.00000    0.02617    0.01715 =
         0.02850    0.01073    0.00865   -0.00612
AFIX  43
H17A  2    0.856430    0.543065   -0.190808    11.00000   -1.20000
AFIX   0
C18A  1    0.807451    0.491448   -0.109651    11.00000    0.01284    0.02881 =
         0.01915   -0.00199   -0.00110   -0.00008
AFIX  43
H18A  2    0.867390    0.525804   -0.090302    11.00000   -1.20000
AFIX   0
C19A  1    0.616467    0.336168    0.026509    11.00000    0.00872    0.01905 =
         0.02372    0.00344    0.00158    0.00035
C20A  1    0.627716    0.237916    0.021077    11.00000    0.02003    0.01694 =
         0.02832   -0.00282    0.00990   -0.00108
AFIX  43
H20A  2    0.701703    0.210872    0.005208    11.00000   -1.20000
AFIX   0
C21A  1    0.530535    0.179173    0.038896    11.00000    0.02031    0.01579 =
         0.04055    0.00296    0.00331   -0.00069
AFIX  43
H21A  2    0.538862    0.111623    0.036064    11.00000   -1.20000
AFIX   0
C22A  1    0.420549    0.218474    0.060965    11.00000    0.02513    0.03004 =
         0.02201    0.00416    0.00060   -0.00433
AFIX  43
H22A  2    0.353516    0.178264    0.072624    11.00000   -1.20000
AFIX   0
C23A  1    0.410679    0.316368    0.065579    11.00000    0.02089    0.02747 =
         0.03456   -0.00020    0.00836    0.01001
AFIX  43
H23A  2    0.335212    0.343990    0.079164    11.00000   -1.20000
AFIX   0
C24A  1    0.510734    0.375844    0.050462    11.00000    0.02538    0.02307 =
         0.02767   -0.00500    0.00117    0.01217
AFIX  43
H24A  2    0.505457    0.442810    0.056714    11.00000   -1.20000
AFIX   0
C25A  1    0.654017    0.342220    0.227008    11.00000    0.02952    0.02472 =
         0.01374   -0.00272    0.00628   -0.00563
C26A  1    0.676921    0.245263    0.212893    11.00000    0.02240    0.01211 =
         0.02648    0.00735   -0.00505   -0.00021
AFIX  43
H26A  2    0.758277    0.220919    0.210246    11.00000   -1.20000
AFIX   0
C27A  1    0.579014    0.186448    0.203004    11.00000    0.02724    0.01556 =
         0.02428    0.00133   -0.00189   -0.00096
AFIX  43
H27A  2    0.593853    0.121618    0.192974    11.00000   -1.20000
AFIX   0
C28A  1    0.459691    0.220733    0.207517    11.00000    0.01838    0.02641 =
         0.02725   -0.00229   -0.00360   -0.00797
AFIX  43
H28A  2    0.393495    0.179520    0.200653    11.00000   -1.20000
AFIX   0
C29A  1    0.437189    0.315431    0.222090    11.00000    0.01996    0.02087 =
         0.02686   -0.00534   -0.00498   -0.00380
AFIX  43
H29A  2    0.355447    0.338474    0.226783    11.00000   -1.20000
AFIX   0
C30A  1    0.536200    0.377379    0.229911    11.00000    0.02459    0.01051 =
         0.02734   -0.00466    0.00152   -0.00277
AFIX  43
H30A  2    0.521412    0.443275    0.237171    11.00000   -1.20000
AFIX   0
C31A  1    0.782779    0.449544    0.314520    11.00000    0.02732    0.02637 =
         0.02082   -0.00555    0.00781   -0.00020
C32A  1    0.692125    0.417194    0.355134    11.00000    0.02336    0.01705 =
         0.03057   -0.00029    0.00095    0.00065
AFIX  43
H32A  2    0.626281    0.379620    0.343168    11.00000   -1.20000
AFIX   0
C33A  1    0.699413    0.440620    0.413204    11.00000    0.02730    0.02351 =
         0.02815    0.00235    0.00074    0.00329
AFIX  43
H33A  2    0.638371    0.419043    0.441346    11.00000   -1.20000
AFIX   0
C34A  1    0.795972    0.495613    0.430159    11.00000    0.04513    0.02479 =
         0.01626   -0.00369   -0.00257    0.00417
AFIX  43
H34A  2    0.800789    0.511850    0.469918    11.00000   -1.20000
AFIX   0
C35A  1    0.886294    0.527222    0.388830    11.00000    0.03482    0.03897 =
         0.01917   -0.01036   -0.00353   -0.00913
AFIX  43
H35A  2    0.952526    0.564375    0.400795    11.00000   -1.20000
AFIX   0
C36A  1    0.879887    0.504756    0.330586    11.00000    0.04066    0.03754 =
         0.02093   -0.01120    0.00269   -0.01540
AFIX  43
H36A  2    0.940543    0.526643    0.302342    11.00000   -1.20000
AFIX   0
O1A   3    0.869464    0.370486    0.113769    11.00000    0.01170    0.01854 =
         0.02285   -0.00031    0.00431    0.00760

rem Au-Au complex B
AU3   8    0.776252    1.050635    0.304056    11.00000    0.03473    0.01597 =
         0.02289    0.00003   -0.00468    0.00053
AU4   8    0.772097    1.054035    0.433795    11.00000    0.04332    0.01643 =
         0.02279    0.00233   -0.00365   -0.00038
CL1B  6    0.777379    1.183127    0.365924    11.00000    0.08841    0.01363 =
         0.02690    0.00082   -0.00765   -0.00298
P1B   5    0.776985    0.919747    0.249651    11.00000    0.02018    0.01540 =
         0.02205   -0.00015   -0.00210   -0.00034
P2B   5    0.763277    0.918220    0.487610    11.00000    0.02632    0.01799 =
         0.02040    0.00100   -0.00371   -0.00111
C1B   1    0.935048    0.823910    0.320267    11.00000    0.00803    0.02227 =
         0.02644   -0.00086   -0.00358   -0.00327
C2B   1    0.907455    0.843953    0.262793    11.00000    0.00904    0.01667 =
         0.03032    0.00043    0.00288    0.00243
C3B   1    0.977539    0.796903    0.219279    11.00000    0.03645    0.01530 =
         0.02323    0.00844   -0.00136   -0.00343
AFIX  43
H3B   2    0.962642    0.808954    0.179338    11.00000   -1.20000
AFIX   0
C4B   1    1.069558    0.732106    0.234624    11.00000    0.02099    0.02386 =
         0.04672   -0.00260    0.01032   -0.00183
AFIX  43
H4B   2    1.113495    0.698599    0.204634    11.00000   -1.20000
AFIX   0
C5B   1    1.098710    0.715195    0.292047    11.00000    0.02233    0.02526 =
         0.03864   -0.00091    0.00104    0.00021
AFIX  43
H5B   2    1.163471    0.672570    0.301155    11.00000   -1.20000
AFIX   0
C6B   1    1.030773    0.762218    0.336576    11.00000    0.01958    0.01267 =
         0.03462    0.00111   -0.00283   -0.00734
C7B   1    1.028397    0.763599    0.398351    11.00000    0.02566    0.01892 =
         0.03825    0.00764   -0.00658   -0.00195
C8B   1    0.934669    0.824315    0.415225    11.00000    0.01519    0.01931 =
         0.02925    0.00160   -0.01023   -0.01017
C9B   1    0.899215    0.844854    0.472322    11.00000    0.01553    0.01590 =
         0.03434    0.00220   -0.00386   -0.01132
C10B  1    0.965859    0.804132    0.515969    11.00000    0.02589    0.02656 =
         0.02779   -0.00155   -0.00304   -0.00376
AFIX  43
H10B  2    0.945993    0.818010    0.555658    11.00000   -1.20000
AFIX   0
C11B  1    1.065060    0.740878    0.500971    11.00000    0.02477    0.01515 =
         0.04923    0.00777   -0.01561   -0.00166
AFIX  43
H11B  2    1.109682    0.711529    0.531117    11.00000   -1.20000
AFIX   0
C12B  1    1.097573    0.721431    0.443170    11.00000    0.02805    0.02560 =
         0.03772    0.00138   -0.00758   -0.00085
AFIX  43
H12B  2    1.165097    0.680521    0.433714    11.00000   -1.20000
AFIX   0
C13B  1    0.784195    0.947465    0.171802    11.00000    0.02306    0.01873 =
         0.02246   -0.00015   -0.01003   -0.00113
C14B  1    0.884653    1.000138    0.148438    11.00000    0.03011    0.02748 =
         0.02681    0.00196   -0.00176   -0.01335
AFIX  43
H14B  2    0.945604    1.020525    0.173337    11.00000   -1.20000
AFIX   0
C15B  1    0.895415    1.022360    0.089958    11.00000    0.02611    0.02571 =
         0.04413    0.00841    0.00021    0.00093
AFIX  43
H15B  2    0.966704    1.053753    0.073952    11.00000   -1.20000
AFIX   0
C16B  1    0.800605    0.998669    0.053323    11.00000    0.03866    0.02267 =
         0.02492    0.00245    0.00456    0.00675
AFIX  43
H16B  2    0.804933    1.017834    0.013262    11.00000   -1.20000
AFIX   0
C17B  1    0.703711    0.948306    0.076236    11.00000    0.02697    0.02379 =
         0.02557   -0.00397   -0.00351    0.00254
AFIX  43
H17B  2    0.641763    0.930010    0.051283    11.00000   -1.20000
AFIX   0
C18B  1    0.691712    0.922122    0.135893    11.00000    0.03480    0.01709 =
         0.02037   -0.00181   -0.00268    0.00354
AFIX  43
H18B  2    0.622028    0.887923    0.151265    11.00000   -1.20000
AFIX   0
C19B  1    0.646401    0.843491    0.267653    11.00000    0.03161    0.02381 =
         0.02133   -0.00150    0.00271   -0.00616
C20B  1    0.529953    0.880781    0.270659    11.00000    0.02258    0.03493 =
         0.03273    0.00421   -0.00136   -0.00519
AFIX  43
H20B  2    0.518477    0.947247    0.262594    11.00000   -1.20000
AFIX   0
C21B  1    0.429778    0.825118    0.284927    11.00000    0.02497    0.03409 =
         0.03636   -0.00054    0.00158    0.00966
AFIX  43
H21B  2    0.349905    0.852382    0.285998    11.00000   -1.20000
AFIX   0
C22B  1    0.446067    0.730356    0.297540    11.00000    0.02610    0.04297 =
         0.02852   -0.00419   -0.00301    0.00363
AFIX  43
H22B  2    0.376929    0.691572    0.307898    11.00000   -1.20000
AFIX   0
C23B  1    0.560414    0.689943    0.295557    11.00000    0.02729    0.01904 =
         0.04027   -0.00093   -0.00326   -0.00675
AFIX  43
H23B  2    0.571061    0.623719    0.304651    11.00000   -1.20000
AFIX   0
C24B  1    0.661542    0.747726    0.279911    11.00000    0.01073    0.02066 =
         0.04246   -0.00071   -0.00212   -0.00371
AFIX  43
H24B  2    0.741307    0.720272    0.277782    11.00000   -1.20000
AFIX   0
C25B  1    0.749372    0.931149    0.565410    11.00000    0.03108    0.02420 =
         0.02395   -0.00190   -0.00430    0.00382
C26B  1    0.833229    0.990525    0.592382    11.00000    0.03651    0.02384 =
         0.04002   -0.00678    0.00664   -0.00548
AFIX  43
H26B  2    0.895161    1.024394    0.570018    11.00000   -1.20000
AFIX   0
C27B  1    0.821620    0.997518    0.653079    11.00000    0.06366    0.03060 =
         0.03231   -0.01366   -0.00848   -0.01160
AFIX  43
H27B  2    0.875854    1.038064    0.671898    11.00000   -1.20000
AFIX   0
C28B  1    0.735213    0.948166    0.686070    11.00000    0.06385    0.02428 =
         0.02030   -0.00368   -0.01460    0.00862
AFIX  43
H28B  2    0.731253    0.953457    0.727309    11.00000   -1.20000
AFIX   0
C29B  1    0.652423    0.889835    0.659589    11.00000    0.06832    0.04893 =
         0.01241    0.00903   -0.00944   -0.01548
AFIX  43
H29B  2    0.591238    0.855965    0.682443    11.00000   -1.20000
AFIX   0
C30B  1    0.660707    0.882037    0.599626    11.00000    0.05480    0.02112 =
         0.03583   -0.00003   -0.01084   -0.01384
AFIX  43
H30B  2    0.604623    0.842273    0.581404    11.00000   -1.20000
AFIX   0
C31B  1    0.636810    0.844077    0.468658    11.00000    0.02341    0.02781 =
         0.01454   -0.00118   -0.00377    0.00149
C32B  1    0.645222    0.744899    0.473373    11.00000    0.02638    0.01840 =
         0.03322    0.00006   -0.01010   -0.00096
AFIX  43
H32B  2    0.719358    0.715004    0.484052    11.00000   -1.20000
AFIX   0
C33B  1    0.542692    0.689052    0.462158    11.00000    0.03365    0.02863 =
         0.03090    0.00143   -0.00051   -0.00466
AFIX  43
H33B  2    0.547476    0.621112    0.465001    11.00000   -1.20000
AFIX   0
C34B  1    0.438341    0.732086    0.447461    11.00000    0.02067    0.03858 =
         0.04065   -0.00641   -0.00660   -0.00248
AFIX  43
H34B  2    0.369367    0.693606    0.440867    11.00000   -1.20000
AFIX   0
C35B  1    0.427678    0.831351    0.441535    11.00000    0.02684    0.05284 =
         0.04418   -0.01641   -0.01010    0.01934
AFIX  43
H35B  2    0.352639    0.859863    0.430937    11.00000   -1.20000
AFIX   0
C36B  1    0.528256    0.888358    0.451321    11.00000    0.02828    0.02936 =
         0.03246    0.00379   -0.00622    0.00709
AFIX  43
H36B  2    0.523555    0.956048    0.446357    11.00000   -1.20000
AFIX   0
O1B   3    0.875991    0.861393    0.367950    11.00000    0.01892    0.02169 =
         0.02486    0.00065   -0.00224   -0.00127

rem counterions
SB1   7    0.297767    0.439145    0.381630    11.00000    0.02178    0.01668 =
         0.01947   -0.00018   -0.00044   -0.00090
F1    4    0.228324    0.383372    0.319269    11.00000    0.03615    0.08454 =
         0.04852   -0.03532   -0.00061   -0.02267
F2    4    0.183657    0.378136    0.433750    11.00000    0.03182    0.04842 =
         0.03836    0.00749   -0.00091   -0.01061
F3    4    0.367540    0.498107    0.443623    11.00000    0.06764    0.07696 =
         0.03294   -0.01570    0.00130   -0.03940
F4    4    0.409726    0.503454    0.329844    11.00000    0.03611    0.03502 =
         0.02588    0.00380    0.00375   -0.00356
F5    4    0.408752    0.337339    0.387565    11.00000    0.03494    0.03685 =
         0.08909    0.01715    0.00619    0.00956
F6    4    0.193971    0.543134    0.374647    11.00000    0.05956    0.04458 =
         0.08118    0.01930    0.02412    0.02731
SB2   7    0.291721    0.942054    0.128118    11.00000    0.02600    0.01519 =
         0.02348   -0.00286   -0.00396   -0.00260
F7    4    0.179268    0.866624    0.090677    11.00000    0.04907    0.03620 =
         0.04913   -0.01610   -0.01521   -0.00752
F8    4    0.201525    0.924850    0.198304    11.00000    0.05321    0.04967 =
         0.03400    0.00406    0.00297   -0.02364
F9    4    0.401770    1.018911    0.165705    11.00000    0.04172    0.03026 =
         0.03719   -0.00675   -0.01077   -0.01302
F10   4    0.380594    0.965641    0.057758    11.00000    0.04351    0.04967 =
         0.03320   -0.00482    0.01071    0.00219
F11   4    0.388128    0.834217    0.142902    11.00000    0.05931    0.01961 =
         0.06785   -0.00345   -0.03528    0.01349
F12   4    0.198509    1.052387    0.111521    11.00000    0.03784    0.02549 =
         0.05190   -0.00524   -0.00577    0.00565

HKLF      5

REM    xs0849a
REM R1 =  0.0382 for   13204 Fo > 4sig(Fo)  and  0.0451 for all   15046 data
REM    884 parameters refined using     18 restraints

END

WGHT      0.0716      0.0000

REM Instructions for potential hydrogen bonds
HTAB C30A F4
HTAB C32A F5
EQIV $1 -x+1, -y+1, -z+1
HTAB C30B F5_$1
HTAB C32B F2_$1

REM Highest difference peak  1.215,  deepest hole -1.204,  1-sigma level  0.234
Q1    1   0.7201  0.5602  0.1710  11.00000  0.05    1.21
Q2    1   0.7555  0.6217  0.0080  11.00000  0.05    1.18
Q3    1   0.7025  1.0488  0.3086  11.00000  0.05    1.18
Q4    1   0.7718  0.5448  0.1919  11.00000  0.05    1.17
Q5    1   0.7091  0.5605  0.0412  11.00000  0.05    1.12
Q6    1   0.7830  0.9774  0.3510  11.00000  0.05    1.09
Q7    1   0.7031  1.0457  0.4386  11.00000  0.05    1.09
Q8    1   0.7471  0.5961  0.2185  11.00000  0.05    1.06
Q9    1   0.7646  0.9694  0.2902  11.00000  0.05    1.04
Q10   1   0.7510  0.5369  0.0610  11.00000  0.05    1.04
;
_shelx_res_checksum    4094

_shelx_hkl_file
;
   0   0  -1 3362.64 225.497  -2
   0   0  -1 3362.64 225.497   1
   0   0  -2 360.625 194.757  -2
   0   0  -2 360.625 194.757   1
   0   0  -3 248.033 67.4405  -2
   0   0  -3 248.033 67.4405   1
   0   0  -4 22663.8 20277.4  -2
   0   0  -4 22663.8 20277.4   1
   0   0  -5 5461.54 7114.18  -2
   0   0  -5 5461.54 7114.18   1
   0   0  -6 631.339 819.224  -2
   0   0  -6 631.339 819.224   1
   0   0  -7 44009.0 3312.47  -2
   0   0  -7 44009.0 3312.47   1
   0   0  -8 235382. 17759.9  -2
   0   0  -8 235382. 17759.9   1
   0   0  -9 14978.2 778.417  -2
   0   0  -9 14978.2 778.417   1
   0   0  10 3117.27 306.620  -2
   0   0  10 3117.27 306.620   1
   0   0 -11 26613.4 1813.71  -2
   0   0 -11 26613.4 1813.71   1
   0   0 -12 90670.7 3658.78  -2
   0   0 -12 90670.7 3658.78   1
   0   0  13 1248.59 386.356  -2
   0   0  13 1248.59 386.356   1
   0   0 -14 5747.62 1782.07  -2
   0   0 -14 5747.62 1782.07   1
   0   0 -15 72571.5 3581.46  -2
   0   0 -15 72571.5 3581.46   1
   0   0  16 302335. 21913.4  -2
   0   0  16 302335. 21913.4   1
   0   0  17 21992.1 5641.32  -2
   0   0  17 21992.1 5641.32   1
   0   0  18 19983.5 929.944  -2
   0   0  18 19983.5 929.944   1
   0   0  19 595.059 245.839  -2
   0   0  19 595.059 245.839   1
   0   0  20 4242.41 614.943  -2
   0   0  20 4242.41 614.943   1
   0   0 -21 11105.5 3707.62  -2
   0   0 -21 11105.5 3707.62   1
   0   0  22 32.4524 472.158  -2
   0   0  22 32.4524 472.158   1
   0   0 -23 104708. 24050.6  -2
   0   0 -23 104708. 24050.6   1
   0   0  24 1323.83 200.816  -2
   0   0  24 1323.83 200.816   1
   0   0  25 5829.83 3771.21  -2
   0   0  25 5829.83 3771.21   1
   0   0  26 531.936 493.957  -2
   0   0  26 531.936 493.957   1
   0   0  27 280.583 242.692  -2
   0   0  27 280.583 242.692   1
   0   0  28 2030.24 291.360  -2
   0   0  28 2030.24 291.360   1
   0   1  28 3437.68 277.201  -2
   0  -1  28 3437.68 277.201   1
   0   1  27 224.665 326.670  -2
   0  -1  27 224.665 326.670   1
   0   1  26 198.936 290.890  -2
   0  -1  26 198.936 290.890   1
   0   1  25 16642.3 813.181  -2
   0  -1  25 16642.3 813.181   1
   0   1  24 2885.01 483.945  -2
   0  -1  24 2885.01 483.945   1
   0   1  23 16542.2 952.768  -2
   0  -1  23 16542.2 952.768   1
   0   1  22 41466.3 2300.34  -2
   0  -1  22 41466.3 2300.34   1
   0   1  21 51128.4 5538.48  -2
   0  -1  21 51128.4 5538.48   1
   0  -1 -20 830.325 496.556  -2
   0   1 -20 830.325 496.556   1
   0   1  19 2407.14 557.015  -2
   0  -1  19 2407.14 557.015   1
   0   1  18 124850. 2126.65  -2
   0  -1  18 124850. 2126.65   1
   0  -1 -17 18078.3 1711.17  -2
   0   1 -17 18078.3 1711.17   1
   0   1  16 1899.45 958.094  -2
   0  -1  16 1899.45 958.094   1
   0  -1 -15 11058.3 1351.21  -2
   0   1 -15 11058.3 1351.21   1
   0   1  14 165741. 10273.8  -2
   0  -1  14 165741. 10273.8   1
   0  -1 -13 3110.57 904.801  -2
   0   1 -13 3110.57 904.801   1
   0   1  12 3068.21 977.457  -2
   0  -1  12 3068.21 977.457   1
   0  -1 -11 25319.4 1495.52  -2
   0   1 -11 25319.4 1495.52   1
   0  -1 -10 17305.7 1070.23  -2
   0   1 -10 17305.7 1070.23   1
   0  -1  -9 142609. 9823.29  -2
   0   1  -9 142609. 9823.29   1
   0   1   8 651.031 677.708  -2
   0  -1   8 651.031 677.708   1
   0  -1  -7 256828. 8891.94  -2
   0   1  -7 256828. 8891.94   1
   0   1   6 62861.3 7142.71  -2
   0  -1   6 62861.3 7142.71   1
   0   1   5 260674. 2862.65  -2
   0  -1   5 260674. 2862.65   1
   0  -1  -4 58.7589 100.363  -2
   0   1  -4 58.7589 100.363   1
   0  -1  -3 13377.9 467.758  -2
   0   1  -3 13377.9 467.758   1
   0  -1  -2 52234.4 594.149  -2
   0   1  -2 52234.4 594.149   1
   0  -1  -1 130475. 731.892  -2
   0   1  -1 130475. 731.892   1
   0   1   0 94.4774 87.7240   1
   0   1   0 376.491 286.791  -2
   0  -1   0 376.491 286.791   1
   0   1  -1 128863. 2012.92  -2
   0  -1  -1 128863. 2012.92   1
   0   1  -2 43795.6 475.123  -2
   0  -1  -2 43795.6 475.123   1
   0   1  -3 11724.6 747.529  -2
   0  -1  -3 11724.6 747.529   1
   0   1  -4 105.692 350.628  -2
   0  -1  -4 105.692 350.628   1
   0   1  -5 286332. 4379.87  -2
   0  -1  -5 286332. 4379.87   1
   0  -1   6 83629.4 1399.07  -2
   0   1   6 83629.4 1399.07   1
   0   1  -7 297059. 4331.33  -2
   0  -1  -7 297059. 4331.33   1
   0   1  -8 825.249 470.107  -2
   0  -1  -8 825.249 470.107   1
   0   1  -9 177469. 4043.09  -2
   0  -1  -9 177469. 4043.09   1
   0   1 -10 17678.1 1675.30  -2
   0  -1 -10 17678.1 1675.30   1
   0  -1  11 25260.3 2043.86  -2
   0   1  11 25260.3 2043.86   1
   0  -1  12 4178.60 1067.25  -2
   0   1  12 4178.60 1067.25   1
   0   1 -13 3420.26 1170.58  -2
   0  -1 -13 3420.26 1170.58   1
   0  -1  14 155107. 4259.49  -2
   0   1  14 155107. 4259.49   1
   0   1 -15 15518.8 3293.23  -2
   0  -1 -15 15518.8 3293.23   1
   0  -1  16 1310.79 955.162  -2
   0   1  16 1310.79 955.162   1
   0   1 -17 24803.2 8965.67  -2
   0  -1 -17 24803.2 8965.67   1
   0  -1  18 103954. 9072.10  -2
   0   1  18 103954. 9072.10   1
   0   1 -19 2077.56 618.206  -2
   0  -1 -19 2077.56 618.206   1
   0   1 -20 1111.02 534.084  -2
   0  -1 -20 1111.02 534.084   1
   0  -1  21 43637.1 2022.53  -2
   0   1  21 43637.1 2022.53   1
   0  -1  22 28017.8 1404.33  -2
   0   1  22 28017.8 1404.33   1
   0   1 -23 13329.2 856.277  -2
   0  -1 -23 13329.2 856.277   1
   0   1 -24 1494.68 462.251  -2
   0  -1 -24 1494.68 462.251   1
   0   1 -25 15118.2 687.756  -2
   0  -1 -25 15118.2 687.756   1
   0   1 -26 107.436 351.657  -2
   0  -1 -26 107.436 351.657   1
   0  -1  27 574.221 511.580  -2
   0   1  27 574.221 511.580   1
   0  -1  28 3117.30 312.552  -2
   0   1  28 3117.30 312.552   1
   0   2  28 14977.0 329.110  -2
   0  -2  28 14977.0 329.110   1
   0   2  27 6075.82 697.552  -2
   0  -2  27 6075.82 697.552   1
   0   2  26 116.689 281.535  -2
   0  -2  26 116.689 281.535   1
   0   2  25 8414.26 521.355  -2
   0  -2  25 8414.26 521.355   1
   0   2  24 10623.3 827.074  -2
   0  -2  24 10623.3 827.074   1
   0   2  23 79509.2 4097.38  -2
   0  -2  23 79509.2 4097.38   1
   0   2  22 1854.84 512.622  -2
   0  -2  22 1854.84 512.622   1
   0   2  21 31118.9 1051.63  -2
   0  -2  21 31118.9 1051.63   1
   0   2  20 624.007 475.620  -2
   0  -2  20 624.007 475.620   1
   0  -2 -19 4092.26 659.131  -2
   0   2 -19 4092.26 659.131   1
   0  -2 -18 6149.87 779.299  -2
   0   2 -18 6149.87 779.299   1
   0  -2 -17 9798.79 1316.86  -2
   0   2 -17 9798.79 1316.86   1
   0  -2 -16 194251. 4477.75  -2
   0   2 -16 194251. 4477.75   1
   0  -2 -15 50554.9 2344.77  -2
   0   2 -15 50554.9 2344.77   1
   0  -2 -14 8917.30 1329.08  -2
   0   2 -14 8917.30 1329.08   1
   0  -2 -13 5934.31 979.571  -2
   0   2 -13 5934.31 979.571   1
   0  -2 -12 32147.6 1715.13  -2
   0   2 -12 32147.6 1715.13   1
   0  -2 -11 14371.8 1390.70  -2
   0   2 -11 14371.8 1390.70   1
   0   2  10 2481.91 652.744  -2
   0  -2  10 2481.91 652.744   1
   0   2   9 153716. 2327.84  -2
   0  -2   9 153716. 2327.84   1
   0   2   8 163839. 4199.16  -2
   0  -2   8 163839. 4199.16   1
   0  -2  -7 251554. 2817.74  -2
   0   2  -7 251554. 2817.74   1
   0  -2  -6 1283.69 503.452  -2
   0   2  -6 1283.69 503.452   1
   0  -2  -5 8226.34 547.280  -2
   0   2  -5 8226.34 547.280   1
   0  -2  -4 115111. 1409.98  -2
   0   2  -4 115111. 1409.98   1
   0   2   3 6057.29 384.823  -2
   0  -2   3 6057.29 384.823   1
   0   2  -2 155.736 144.874   1
   0   2   2 108.486 129.989  -2
   0  -2   2 108.486 129.989   1
   0   2  -1 729.055 178.012   1
   0   2   1 1639.64 644.065  -2
   0  -2   1 1639.64 644.065   1
   0   2   0 366165. 13816.2   1
   0   2   0 599590. 4136.72  -2
   0  -2   0 599590. 4136.72   1
   0  -2   1 2471.14 299.888  -2
   0   2   1 2471.14 299.888   1
   0  -2  -2 5.45564 157.989   1
   0  -2   2 262.380 368.381  -2
   0   2   2 262.380 368.381   1
   0   2   3 2832.05 149.205   1
   0  -2   3 5462.29 483.144  -2
   0   2   3 5462.29 483.144   1
   0   2  -4 123187. 1672.37  -2
   0  -2  -4 123187. 1672.37   1
   0   2  -5 6106.23 500.412  -2
   0  -2  -5 6106.23 500.412   1
   0   2  -6 1225.93 476.536  -2
   0  -2  -6 1225.93 476.536   1
   0   2  -7 212247. 3283.45  -2
   0  -2  -7 212247. 3283.45   1
   0   2  -8 201995. 5399.60  -2
   0  -2  -8 201995. 5399.60   1
   0   2  -9 143981. 9987.47  -2
   0  -2  -9 143981. 9987.47   1
   0   2 -10 1026.61 1015.75  -2
   0  -2 -10 1026.61 1015.75   1
   0   2 -11 9311.96 1291.72  -2
   0  -2 -11 9311.96 1291.72   1
   0   2 -12 38936.4 2110.39  -2
   0  -2 -12 38936.4 2110.39   1
   0   2 -13 4542.30 1136.63  -2
   0  -2 -13 4542.30 1136.63   1
   0   2 -14 9700.57 1361.45  -2
   0  -2 -14 9700.57 1361.45   1
   0  -2  15 34617.8 4321.62  -2
   0   2  15 34617.8 4321.62   1
   0  -2  16 269020. 52679.3  -2
   0   2  16 269020. 52679.3   1
   0   2 -17 8954.04 1281.06  -2
   0  -2 -17 8954.04 1281.06   1
   0  -2  18 6963.62 881.899  -2
   0   2  18 6963.62 881.899   1
   0   2 -19 4221.67 732.615  -2
   0  -2 -19 4221.67 732.615   1
   0   2 -20 757.945 508.913  -2
   0  -2 -20 757.945 508.913   1
   0  -2  21 23888.8 1007.48  -2
   0   2  21 23888.8 1007.48   1
   0   2 -22 2675.60 548.235  -2
   0  -2 -22 2675.60 548.235   1
   0   2 -23 69154.2 1445.24  -2
   0  -2 -23 69154.2 1445.24   1
   0  -2  24 10864.9 610.722  -2
   0   2  24 10864.9 610.722   1
   0  -2  25 7220.71 525.349  -2
   0   2  25 7220.71 525.349   1
   0  -2  26 278.673 279.592  -2
   0   2  26 278.673 279.592   1
   0  -2 -27 554.406 105.317   1
   0  -2  27 5252.81 653.057  -2
   0   2  27 5252.81 653.057   1
   0  -2  28 17387.7 434.117  -2
   0   2  28 17387.7 434.117   1
   0  -3  27 353.257 198.038   1
   0  -3  26 2918.41 317.710   1
   0  -3  25 19339.3 642.033   1
   0   3  25 53626.3 859.946  -2
   0  -3  25 53626.3 859.946   1
   0   3  24 1200.73 421.001  -2
   0  -3  24 1200.73 421.001   1
   0   3  23 22933.1 715.493  -2
   0  -3  23 22933.1 715.493   1
   0   3  22 24467.3 1506.60  -2
   0  -3  22 24467.3 1506.60   1
   0   3  21 41752.0 886.966  -2
   0  -3  21 41752.0 886.966   1
   0   3  20 747.698 480.763  -2
   0  -3  20 747.698 480.763   1
   0   3  19 2463.53 487.537  -2
   0  -3  19 2463.53 487.537   1
   0  -3 -18 36604.0 1292.42  -2
   0   3 -18 36604.0 1292.42   1
   0   3  17 2237.68 890.276  -2
   0  -3  17 2237.68 890.276   1
   0  -3 -16 2566.83 974.130  -2
   0   3 -16 2566.83 974.130   1
   0  -3 -15 18906.6 1458.93  -2
   0   3 -15 18906.6 1458.93   1
   0  -3 -14 266891. 3885.41  -2
   0   3 -14 266891. 3885.41   1
   0  -3 -13 10591.4 1116.96  -2
   0   3 -13 10591.4 1116.96   1
   0  -3 -12 902.734 695.160  -2
   0   3 -12 902.734 695.160   1
   0  -3 -11 22526.2 1260.57  -2
   0   3 -11 22526.2 1260.57   1
   0  -3 -10 92404.3 2705.30  -2
   0   3 -10 92404.3 2705.30   1
   0   3   9 122496. 7740.16  -2
   0  -3   9 122496. 7740.16   1
   0  -3  -8 156.168 178.038  -2
   0   3  -8 156.168 178.038   1
   0  -3  -7 112034. 5639.42  -2
   0   3  -7 112034. 5639.42   1
   0   3   6 146486. 5018.12  -2
   0  -3   6 146486. 5018.12   1
   0  -3  -5 75937.6 1139.70  -2
   0   3  -5 75937.6 1139.70   1
   0   3  -4 684.827 333.378   1
   0   3   4 2076.96 407.302  -2
   0  -3   4 2076.96 407.302   1
   0   3  -3 742.372 328.470   1
   0   3   3 1739.91 381.403  -2
   0  -3   3 1739.91 381.403   1
   0   3  -2 478239. 8012.90   1
   0   3   2 788770. 4066.19  -2
   0  -3   2 788770. 4066.19   1
   0  -3   1 2865.49 295.340   1
   0   3   1 4199.73 917.834  -2
   0  -3   1 4199.73 917.834   1
   0  -3   0 446.034 110.734   1
   0   3   0 861.420 536.729  -2
   0  -3   0 861.420 536.729   1
   0  -3  -1 873.092 257.895   1
   0   3  -1 3852.88 411.013  -2
   0  -3  -1 3852.88 411.013   1
   0  -3  -2 443874. 2246.37   1
   0   3  -2 758010. 9082.65  -2
   0  -3  -2 758010. 9082.65   1
   0   3  -3 2187.64 474.254  -2
   0  -3  -3 2187.64 474.254   1
   0  -3  -4 428.040 282.448   1
   0   3  -4 1056.92 579.222  -2
   0  -3  -4 1056.92 579.222   1
   0  -3   5 88834.4 1543.12  -2
   0   3   5 88834.4 1543.12   1
   0   3   6 30015.4 494.741   1
   0  -3   6 122362. 1918.06  -2
   0   3   6 122362. 1918.06   1
   0   3  -7 150576. 2191.13  -2
   0  -3  -7 150576. 2191.13   1
   0   3  -8 440.873 472.513  -2
   0  -3  -8 440.873 472.513   1
   0  -3  -9 174662. 2434.52   1
   0  -3   9 160723. 10052.4  -2
   0   3   9 160723. 10052.4   1
   0   3 -10 78034.4 2929.22  -2
   0  -3 -10 78034.4 2929.22   1
   0   3 -11 33811.9 1767.58  -2
   0  -3 -11 33811.9 1767.58   1
   0   3 -12 1355.84 1053.35  -2
   0  -3 -12 1355.84 1053.35   1
   0  -3  13 12607.5 1271.31  -2
   0   3  13 12607.5 1271.31   1
   0  -3  14 229855. 4122.81  -2
   0   3  14 229855. 4122.81   1
   0   3 -15 23321.1 1523.68  -2
   0  -3 -15 23321.1 1523.68   1
   0   3 -16 1316.10 374.448  -2
   0  -3 -16 1316.10 374.448   1
   0   3 -17 1937.54 1282.95  -2
   0  -3 -17 1937.54 1282.95   1
   0  -3  18 28541.8 1230.48  -2
   0   3  18 28541.8 1230.48   1
   0   3  19 2093.65 1421.96   1
   0   3 -19 2251.56 567.647  -2
   0  -3 -19 2251.56 567.647   1
   0  -3  20 731.358 734.180  -2
   0   3  20 731.358 734.180   1
   0  -3  21 54164.3 1218.23  -2
   0   3  21 54164.3 1218.23   1
   0   3  22 10060.0 750.024   1
   0   3 -22 24068.0 823.590  -2
   0  -3 -22 24068.0 823.590   1
   0  -3 -23 24631.4 582.666   1
   0  -3  23 28274.2 824.105  -2
   0   3  23 28274.2 824.105   1
   0   3  24 15.6567 253.382   1
   0  -3  24 1457.09 439.075  -2
   0   3  24 1457.09 439.075   1
   0   3  25 44495.0 757.398   1
   0   3  26 1998.43 237.708   1
   0   3  27 1062.70 240.702   1
   0  -4  27 3352.77 270.655   1
   0  -4  26 208.163 245.245   1
   0  -4  25 9705.80 990.299   1
   0  -4  24 25143.6 793.994   1
   0  -4  23 28124.0 980.601   1
   0  -4  22 1667.03 473.145   1
   0  -4  21 3861.75 555.972   1
   0  -4  20 40.1531 443.954   1
   0  -4  19 2578.35 547.434   1
   0   4  19 1926.53 499.837  -2
   0  -4  19 1926.53 499.837   1
   0  -4  18 383.653 492.351   1
   0   4 -17 266.891 521.240   1
   0   4  17 747.963 423.129  -2
   0  -4  17 747.963 423.129   1
   0   4 -16 30071.8 1153.83   1
   0   4 -15 18820.0 1111.14   1
   0   4 -14 2025.63 533.735   1
   0   4 -13 955.208 566.401   1
   0  -4 -12 8444.48 989.635  -2
   0   4 -12 8444.48 989.635   1
   0  -4 -11 82256.3 2037.95  -2
   0   4 -11 82256.3 2037.95   1
   0   4 -10-16.1199 456.261   1
   0   4  10 12.4355 805.033  -2
   0  -4  10 12.4355 805.033   1
   0  -4  -9 244024. 4227.09  -2
   0   4  -9 244024. 4227.09   1
   0   4   8 106355. 8835.78  -2
   0  -4   8 106355. 8835.78   1
   0  -4  -7 315255. 4016.26  -2
   0   4  -7 315255. 4016.26   1
   0   4  -6 900.197 432.436   1
   0   4   6 3297.19 497.211  -2
   0  -4   6 3297.19 497.211   1
   0   4  -5 52659.6 1194.00   1
   0   4   5 80628.3 1218.98  -2
   0  -4   5 80628.3 1218.98   1
   0   4  -4 159.700 322.970   1
   0   4   4 162.297 410.163  -2
   0  -4   4 162.297 410.163   1
   0   4  -3 2315.73 303.298   1
   0   4   3 3073.61 459.428  -2
   0  -4   3 3073.61 459.428   1
   0   4  -2 3.81850 241.140   1
   0   4   2 118.965 374.937  -2
   0  -4   2 118.965 374.937   1
   0  -4   1 49143.2 881.827   1
   0   4   1 76545.1 1423.75  -2
   0  -4   1 76545.1 1423.75   1
   0  -4   0 39901.1 826.219   1
   0   4   0 68471.4 2074.85  -2
   0  -4   0 68471.4 2074.85   1
   0   4   1 36902.5 804.651   1
   0   4  -1 67021.7 4668.42  -2
   0  -4  -1 67021.7 4668.42   1
   0  -4  -2 44.2243 274.166   1
   0   4  -2 169.565 530.645  -2
   0  -4  -2 169.565 530.645   1
   0  -4  -3 457.449 281.922   1
   0   4  -3 2648.14 572.409  -2
   0  -4  -3 2648.14 572.409   1
   0  -4  -4 559.207 279.579   1
   0   4  -4 160.693 333.609  -2
   0  -4  -4 160.693 333.609   1
   0   4   5 41474.5 3336.63   1
   0   4  -5 79857.4 1458.27  -2
   0  -4  -5 79857.4 1458.27   1
   0  -4  -6 3881.53 304.840   1
   0   4  -6 4538.95 731.196  -2
   0  -4  -6 4538.95 731.196   1
   0   4   7 138524. 1050.29   1
   0   4  -7 306064. 3955.69  -2
   0  -4  -7 306064. 3955.69   1
   0  -4  -8 150632. 1931.20   1
   0  -4   8 139453. 2251.86  -2
   0   4   8 139453. 2251.86   1
   0  -4  -9 99689.4 1823.20   1
   0  -4   9 220694. 4455.85  -2
   0   4   9 220694. 4455.85   1
   0  -4  10 942.097 872.828  -2
   0   4  10 942.097 872.828   1
   0  -4 -11 24523.4 1000.60   1
   0  -4  11 69349.5 2149.78  -2
   0   4  11 69349.5 2149.78   1
   0  -4 -12 10991.3 4216.61   1
   0   4 -12 11998.9 1156.94  -2
   0  -4 -12 11998.9 1156.94   1
   0   4  13 588.568 444.921   1
   0   4 -13 2535.17 927.720  -2
   0  -4 -13 2535.17 927.720   1
   0   4  14 1136.42 1092.09   1
   0   4 -14 5332.89 1003.22  -2
   0  -4 -14 5332.89 1003.22   1
   0  -4 -15 2369.41 1217.87   1
   0   4  16 67143.7 12291.9   1
   0   4  17 658.539 700.234   1
   0   4 -17 2175.45 650.864  -2
   0  -4 -17 2175.45 650.864   1
   0   4  18 1846.18 469.510   1
   0  -4 -19 306.859 286.415   1
   0   4  20 320.644 298.983   1
   0  -4 -21 2193.35 389.954   1
   0   4  22 805.606 315.230   1
   0  -4 -23 9688.19 450.735   1
   0   4  24 34947.1 1251.82   1
   0  -4 -25 1103.04 290.219   1
   0  -4 -26 555.524 197.817   1
   0  -4 -27 976.685 156.293   1
   0  -5  26 218.243 222.977   1
   0  -5  25 29787.4 698.544   1
   0  -5  24 35.6923 358.352   1
   0  -5  23 15206.8 1356.99   1
   0  -5  22 300.493 433.829   1
   0  -5  21 23272.2 914.232   1
   0  -5  20-1.10446 446.354   1
   0  -5  19 1710.31 470.694   1
   0  -5  18 23735.3 967.439   1
   0  -5  17 18517.6 678.745   1
   0   5 -16 1394.22 388.685   1
   0   5 -15 8818.73 873.146   1
   0   5 -14 130417. 2885.74   1
   0   5 -13 70.6049 502.114   1
   0   5 -12 497.825 511.915   1
   0   5 -11 6428.68 784.811   1
   0   5 -10 19933.0 1122.22   1
   0   5  -9 54206.8 1589.11   1
   0  -5   8 643.981 445.577   1
   0   5  -7 42930.9 1348.55   1
   0   5   7 46341.3 1177.66  -2
   0  -5   7 46341.3 1177.66   1
   0   5  -6 73981.5 1616.13   1
   0   5   6 186424. 2045.85  -2
   0  -5   6 186424. 2045.85   1
   0   5  -5 38377.2 1111.69   1
   0   5   5 44379.6 1105.45  -2
   0  -5   5 44379.6 1105.45   1
   0   5  -4 518.975 351.669   1
   0   5   4 1225.41 711.677  -2
   0  -5   4 1225.41 711.677   1
   0   5  -3 3090.93 344.831   1
   0   5   3 9333.75 961.884  -2
   0  -5   3 9333.75 961.884   1
   0  -5   2 256297. 2095.32   1
   0   5   2 435483. 3000.23  -2
   0  -5   2 435483. 3000.23   1
   0   5  -1 3246.61 376.931   1
   0   5   1 7260.12 806.608  -2
   0  -5   1 7260.12 806.608   1
   0  -5   0 115.775 312.739   1
   0   5   0 110.319 534.338  -2
   0  -5   0 110.319 534.338   1
   0   5   1 5479.17 419.491   1
   0   5  -1 7975.47 879.558  -2
   0  -5  -1 7975.47 879.558   1
   0  -5  -2 249342. 2576.63   1
   0   5  -2 425165. 3136.62  -2
   0  -5  -2 425165. 3136.62   1
   0  -5  -3 9737.89 547.064   1
   0  -5   3 10933.0 669.621  -2
   0   5   3 10933.0 669.621   1
   0  -5  -4-21.1579 297.335   1
   0  -5   4 296.036 303.146  -2
   0   5   4 296.036 303.146   1
   0  -5  -5 12400.8 531.583   1
   0   5  -5 36840.2 1086.06  -2
   0  -5  -5 36840.2 1086.06   1
   0  -5  -6 150526. 1719.95   1
   0   5  -6 203045. 8955.19  -2
   0  -5  -6 203045. 8955.19   1
   0  -5  -7 6602.00 625.519   1
   0  -5   7 34169.4 1281.40  -2
   0   5   7 34169.4 1281.40   1
   0  -5  -8 1827.04 440.760   1
   0   5  -8 2928.62 596.149  -2
   0  -5  -8 2928.62 596.149   1
   0   5   9 9919.79 748.259   1
   0   5  -9 45883.8 1457.03  -2
   0  -5  -9 45883.8 1457.03   1
   0  -5 -10 10143.5 739.420   1
   0  -5 -11 735.093 474.636   1
   0  -5 -12 135.845 429.994   1
   0  -5 -13 7414.58 1345.08   1
   0  -5 -14 127238. 12838.3   1
   0  -5 -15 16494.3 1365.73   1
   0  -5 -16 4254.06 585.141   1
   0   5  17 5964.01 616.171   1
   0  -5 -18 34946.0 936.545   1
   0  -5 -19 3146.93 408.836   1
   0  -5 -20 152.018 292.643   1
   0   5  21 11368.2 579.551   1
   0  -5 -22 6022.27 442.026   1
   0  -5 -23 14747.1 522.493   1
   0   5  24 71.3750 254.685   1
   0  -5 -25 29893.6 621.725   1
   0   5  26 891.954 201.814   1
   0  -5 -27 1291.10 265.968   1
   0  -6  26 91.5925 200.048   1
   0  -6  25 352.964 279.943   1
   0  -6  24 11812.2 531.084   1
   0  -6  23 382.274 391.299   1
   0  -6  22 649.192 420.904   1
   0  -6  21 322.418 431.802   1
   0  -6  20 95.4978 438.358   1
   0  -6  19 2096.31 334.683   1
   0  -6  18 2994.10 400.516   1
   0  -6  17 449.442 474.283   1
   0  -6  16 186328. 2979.30   1
   0  -6  15 8327.54 744.052   1
   0   6 -14 5574.53 866.326   1
   0   6 -13 3681.37 790.478   1
   0   6 -12 16932.6 1177.32   1
   0   6 -11 1848.62 588.250   1
   0   6 -10 801.446 545.335   1
   0   6  -9 45580.8 1618.55   1
   0  -6   8 17779.5 967.945   1
   0  -6   7 113417. 3016.88   1
   0  -6   6 1066.38 472.078   1
   0   6  -5 27999.9 1042.19   1
   0   6   5 95307.7 3643.78  -2
   0  -6   5 95307.7 3643.78   1
   0   6  -4 479.143 367.041   1
   0   6   4 5154.42 583.715  -2
   0  -6   4 5154.42 583.715   1
   0  -6   3 11833.4 634.321   1
   0   6  -2 720.656 313.452   1
   0   6   2 1773.11 571.654  -2
   0  -6   2 1773.11 571.654   1
   0   6  -1 103936. 1547.47   1
   0   6   1 172076. 2339.70  -2
   0  -6   1 172076. 2339.70   1
   0   6   0 65471.1 1268.54   1
   0  -6  -1 102224. 1751.93   1
   0   6  -1 171272. 2422.01  -2
   0  -6  -1 171272. 2422.01   1
   0   6   2 621.094 415.127   1
   0  -6  -3 1824.62 448.097   1
   0  -6  -4 5956.12 841.799   1
   0  -6   4 6202.61 649.604  -2
   0   6   4 6202.61 649.604   1
   0  -6  -5 92935.1 1850.46   1
   0   6  -5 105059. 1849.18  -2
   0  -6  -5 105059. 1849.18   1
   0  -6  -6 157.567 365.422   1
   0   6  -6 1748.16 518.738  -2
   0  -6  -6 1748.16 518.738   1
   0  -6  -7 199512. 2974.04   1
   0   6  -7 265586. 3102.04  -2
   0  -6  -7 265586. 3102.04   1
   0   6   8 3981.15 552.601   1
   0  -6  -9 78924.3 1863.46   1
   0  -6 -10 429.440 438.846   1
   0  -6 -11 8405.23 996.931   1
   0   6  12 6889.31 990.435   1
   0  -6 -13 4046.92 851.555   1
   0  -6 -14 1645.71 735.000   1
   0   6  15 36856.8 1160.52   1
   0  -6 -16 6624.38 533.788   1
   0   6  17 5490.45 631.023   1
   0  -6 -18 2593.52 418.598   1
   0   6  19 9815.31 555.094   1
   0  -6 -20 338.209 458.908   1
   0   6  21 21198.7 688.215   1
   0   6  22 711.908 319.040   1
   0   6  23 49252.4 902.697   1
   0  -6 -24 15332.4 786.999   1
   0   6  25 3557.19 442.243   1
   0  -6 -26 75.5945 168.263   1
   0  -7  25 18111.6 494.962   1
   0  -7  24 22.7986 273.221   1
   0  -7  23 13091.3 581.079   1
   0  -7  22 3648.62 470.935   1
   0  -7  21 35023.6 1035.31   1
   0   7 -20 191.159 272.169   1
   0   7 -19 182.063 296.598   1
   0   7 -18 1611.59 384.387   1
   0   7 -17 29931.6 923.288   1
   0  -7  16 315.176 364.302   1
   0  -7  15 23888.7 911.523   1
   0  -7  14 10625.4 842.774   1
   0  -7  13 1514.83 565.140   1
   0   7  14 110911. 1475.36  -2
   0  -7  13 110911. 1475.36   1
   0   7 -12 44.5756 569.480   1
   0   7 -11 28862.3 1628.49   1
   0   7 -10-7.18924 514.164   1
   0  -7   9 128289. 14285.2   1
   0   7  -8 152.484 542.423   1
   0   7  -7 74476.9 2647.18   1
   0  -7   6 12720.4 953.094   1
   0  -7   5 39865.1 1362.77   1
   0   7  -4 236.014 413.464   1
   0  -7   3 84.5883 311.139   1
   0  -7  -4 150.182 440.848  -2
   0   7  -3 150.182 440.848   1
   0   7  -2 101728. 1627.74   1
   0   7   3 109730. 2174.73  -2
   0  -7   2 109730. 2174.73   1
   0  -7   1 14165.3 804.517   1
   0   7   2 100604. 1902.68  -2
   0  -7   1 100604. 1902.68   1
   0   7   0 95.3929 351.097   1
   0   7   1 9056.34 654.418  -2
   0  -7   0 9056.34 654.418   1
   0  -7  -1 10966.2 707.160   1
   0  -7  -2 128346. 2216.72   1
   0   7  -1 131131. 3209.46  -2
   0  -7  -2 131131. 3209.46   1
   0  -7  -3 6990.35 1146.06   1
   0   7  -2 76411.5 5250.52  -2
   0  -7  -3 76411.5 5250.52   1
   0   7   4-4.16421 408.698   1
   0   7  -3 148.580 482.893  -2
   0  -7  -4 148.580 482.893   1
   0  -7  -5 21342.3 1020.54   1
   0   7  -4 22936.8 1076.96  -2
   0  -7  -5 22936.8 1076.96   1
   0  -7  -6 36000.7 1317.37   1
   0   7  -5 66442.6 1651.42  -2
   0  -7  -6 66442.6 1651.42   1
   0  -7  -7 19805.7 1025.15   1
   0   7  -6 28514.1 1210.03  -2
   0  -7  -7 28514.1 1210.03   1
   0  -7  -8 1994.15 601.463   1
   0   7  -7 58038.3 1610.67  -2
   0  -7  -8 58038.3 1610.67   1
   0   7   9 40764.2 1553.97   1
   0   7  10 6174.45 792.660   1
   0   7  11 10217.4 1075.95   1
   0  -7 -12 886.206 711.731   1
   0  -7 -13 5064.02 891.186   1
   0  -7 -14 150685. 1645.65   1
   0  -7 -15 3435.76 435.719   1
   0  -7 -16 5081.81 451.631   1
   0  -7 -17 806.340 336.719   1
   0   7  18 41094.1 808.066   1
   0   7  19 1287.80 359.349   1
   0   7  20-9.58230 300.594   1
   0   7  21 157.252 322.688   1
   0   7  22 31298.4 753.037   1
   0   7  23 1185.86 297.862   1
   0   7  24 2776.86 280.173   1
   0   7  25 718.504 263.698   1
   0   7  26 2206.40 254.284   1
   0  -8  24 2958.09 295.793   1
   0  -8  23 11378.5 503.505   1
   0  -8  22 225.848 263.808   1
   0  -8  21 807.227 243.904   1
   0   8 -20-45.2559 275.098   1
   0   8 -19 429.955 321.748   1
   0  -8  18 181.418 304.462   1
   0   8  19 1619.78 487.662  -2
   0  -8  18 1619.78 487.662   1
   0  -8  17 515.985 348.237   1
   0   8  18 818.221 507.064  -2
   0  -8  17 818.221 507.064   1
   0  -8  16 168396. 1896.39   1
   0   8  17 193513. 2348.25  -2
   0  -8  16 193513. 2348.25   1
   0   8 -15 966.119 395.810   1
   0   8  16 28051.3 1410.54  -2
   0  -8  15 28051.3 1410.54   1
   0   8 -14 1391.68 804.039   1
   0  -8 -15 33992.4 1035.54  -2
   0   8 -14 33992.4 1035.54   1
   0   8 -13 352.919 2270.95   1
   0   8  14 924.101 628.219  -2
   0  -8  13 924.101 628.219   1
   0  -8  12 24161.8 1867.55   1
   0   8  13 25087.3 1207.26  -2
   0  -8  12 25087.3 1207.26   1
   0  -8  11 75.1952 586.307   1
   0  -8  10 162.647 565.344   1
   0  -8   9 302.559 483.889   1
   0  -8 -10 668.961 718.507  -2
   0   8  -9 668.961 718.507   1
   0   8   9 65213.7 1970.02  -2
   0  -8   8 65213.7 1970.02   1
   0   8   8 10673.9 913.038  -2
   0  -8   7 10673.9 913.038   1
   0   8   7 23540.7 1137.42  -2
   0  -8   6 23540.7 1137.42   1
   0   8   6 143.706 334.848  -2
   0  -8   5 143.706 334.848   1
   0  -8  -5 17779.5 1008.92  -2
   0   8  -4 17779.5 1008.92   1
   0   8  -3 187.630 286.855   1
   0  -8  -4 3887.11 636.001  -2
   0   8  -3 3887.11 636.001   1
   0   8  -2 362.197 284.614   1
   0   8   3 97.3861 259.471  -2
   0  -8   2 97.3861 259.471   1
   0   8  -1 6819.15 484.080   1
   0   8   2 6363.70 733.004  -2
   0  -8   1 6363.70 733.004   1
   0   8   1 339020. 3416.31  -2
   0  -8   0 339020. 3416.31   1
   0   8   1 20178.1 872.221   1
   0  -8   0 237956. 6347.56  -2
   0   8   1 237956. 6347.56   1
   0   8  -1 4952.87 622.305  -2
   0  -8  -2 4952.87 622.305   1
   0   8  -2 89.0518 266.110  -2
   0  -8  -3 89.0518 266.110   1
   0   8  -3 6158.88 711.982  -2
   0  -8  -4 6158.88 711.982   1
   0   8  -4 19195.9 1016.07  -2
   0  -8  -5 19195.9 1016.07   1
   0   8  -5 8.18331 523.598  -2
   0  -8  -6 8.18331 523.598   1
   0   8   7 31553.9 1322.83   1
   0   8  -6 33815.8 1498.73  -2
   0  -8  -7 33815.8 1498.73   1
   0   8   8 11052.5 1009.64   1
   0   8  -7 12261.5 944.960  -2
   0  -8  -8 12261.5 944.960   1
   0  -8  -9 41481.2 1634.51   1
   0   8  -8 65163.9 2040.02  -2
   0  -8  -9 65163.9 2040.02   1
   0  -8 -10 338.460 592.294   1
   0   8  -9 534.087 673.730  -2
   0  -8 -10 534.087 673.730   1
   0   8  11 7082.44 1010.56   1
   0   8 -10 8871.88 977.524  -2
   0  -8 -11 8871.88 977.524   1
   0   8  12 29092.3 2136.71   1
   0   8 -11 30901.0 1739.22  -2
   0  -8 -12 30901.0 1739.22   1
   0   8  13 2203.88 1119.45   1
   0   8 -12 19237.2 1065.07  -2
   0  -8 -13 19237.2 1065.07   1
   0  -8 -14 1676.93 1018.21   1
   0   8 -13 557.847 642.107  -2
   0  -8 -14 557.847 642.107   1
   0  -8 -15 42900.3 924.448   1
   0   8 -14 47164.6 1184.98  -2
   0  -8 -15 47164.6 1184.98   1
   0  -8 -16 36167.8 898.605   1
   0   8 -15 36225.0 1083.60  -2
   0  -8 -16 36225.0 1083.60   1
   0  -8 -17 18835.1 653.927   1
   0  -8  16 168256. 1909.94  -2
   0   8  17 168256. 1909.94   1
   0   8  18 307.557 304.181   1
   0  -8 -19 1186.74 288.972   1
   0   8  20 4085.57 407.206   1
   0  -8 -21 14823.7 736.015   1
   0  -8 -22 188.688 269.175   1
   0   8  23 44189.6 985.576   1
   0   8  24 3315.98 241.555   1
   0   8  25 3161.35 216.897   1
   0  -9  23 7839.91 384.830   1
   0  -9  22 2145.47 219.401   1
   0  -9  21 11278.5 420.633   1
   0   9 -20 174.487 190.583   1
   0   9  21 3719.47 421.023  -2
   0  -9  20 3719.47 421.023   1
   0  -9  19-148.698 248.241   1
   0   9  20 550.301 402.217  -2
   0  -9  19 550.301 402.217   1
   0   9  19 20374.2 1009.00  -2
   0  -9  18 20374.2 1009.00   1
   0   9  18 23328.6 868.620  -2
   0  -9  17 23328.6 868.620   1
   0   9  17 6834.52 685.871  -2
   0  -9  16 6834.52 685.871   1
   0   9  16 14894.8 869.465  -2
   0  -9  15 14894.8 869.465   1
   0   9  15 37395.6 1174.35  -2
   0  -9  14 37395.6 1174.35   1
   0   9  14 36022.2 1106.41  -2
   0  -9  13 36022.2 1106.41   1
   0  -9 -13 2325.85 617.298  -2
   0   9 -12 2325.85 617.298   1
   0  -9 -12 11099.4 884.437  -2
   0   9 -11 11099.4 884.437   1
   0   9  11 5168.29 842.998  -2
   0  -9  10 5168.29 842.998   1
   0   9  10 147974. 2564.23  -2
   0  -9   9 147974. 2564.23   1
   0  -9  -9 61450.4 2286.47  -2
   0   9  -8 61450.4 2286.47   1
   0  -9  -8 99143.6 2698.85  -2
   0   9  -7 99143.6 2698.85   1
   0   9   7 98449.9 2492.15  -2
   0  -9   6 98449.9 2492.15   1
   0   9   6 89986.3 2399.84  -2
   0  -9   5 89986.3 2399.84   1
   0  -9  -5 61696.7 1990.47  -2
   0   9  -4 61696.7 1990.47   1
   0   9   4 713.966 597.312  -2
   0  -9   3 713.966 597.312   1
   0   9  -2 6039.33 527.078   1
   0   9   3 8633.34 833.772  -2
   0  -9   2 8633.34 833.772   1
   0   9   2 52213.4 1520.96  -2
   0  -9   1 52213.4 1520.96   1
   0  -9  -1 28239.7 1157.70  -2
   0   9   0 28239.7 1157.70   1
   0   9   0 41747.4 1522.29  -2
   0  -9  -1 41747.4 1522.29   1
   0  -9   1 40045.2 1370.39  -2
   0   9   2 40045.2 1370.39   1
   0   9  -2 8577.89 824.765  -2
   0  -9  -3 8577.89 824.765   1
   0   9  -3 1340.64 584.575  -2
   0  -9  -4 1340.64 584.575   1
   0   9  -4 85963.2 2240.56  -2
   0  -9  -5 85963.2 2240.56   1
   0   9  -5 83137.9 2337.26  -2
   0  -9  -6 83137.9 2337.26   1
   0   9  -6 123397. 6429.46  -2
   0  -9  -7 123397. 6429.46   1
   0   9  -7 75755.9 2145.54  -2
   0  -9  -8 75755.9 2145.54   1
   0   9  -8 79023.0 2348.57  -2
   0  -9  -9 79023.0 2348.57   1
   0  -9   9 123857. 3190.81  -2
   0   9  10 123857. 3190.81   1
   0   9 -10 5246.03 791.248  -2
   0  -9 -11 5246.03 791.248   1
   0   9 -11 9361.90 830.184  -2
   0  -9 -12 9361.90 830.184   1
   0   9 -12 4382.38 752.618  -2
   0  -9 -13 4382.38 752.618   1
   0   9 -13 48299.8 1385.91  -2
   0  -9 -14 48299.8 1385.91   1
   0   9 -14 31138.4 1294.29  -2
   0  -9 -15 31138.4 1294.29   1
   0   9 -15 13792.0 997.866  -2
   0  -9 -16 13792.0 997.866   1
   0   9 -16 6730.87 785.839  -2
   0  -9 -17 6730.87 785.839   1
   0   9 -17 26174.0 1066.55  -2
   0  -9 -18 26174.0 1066.55   1
   0   9 -18 17884.6 905.020  -2
   0  -9 -19 17884.6 905.020   1
   0  -9  19 276.101 485.549  -2
   0   9  20 276.101 485.549   1
   0  -9  20 5097.08 574.267  -2
   0   9  21 5097.08 574.267   1
   0   9 -21 36898.6 2329.20  -2
   0  -9 -22 36898.6 2329.20   1
   0  -9 -23 1947.59 253.031   1
   0  -9 -24 893.717 195.328   1
   0  10 -22 188.876 121.958   1
   0  10  23 13438.1 390.857  -2
   0 -10  22 13438.1 390.857   1
   0 -10 -22 2729.62 344.153  -2
   0  10 -21 2729.62 344.153   1
   0 -10 -21 5131.28 452.773  -2
   0  10 -20 5131.28 452.773   1
   0  10  20 2971.65 460.588  -2
   0 -10  19 2971.65 460.588   1
   0  10  19 401.265 442.601  -2
   0 -10  18 401.265 442.601   1
   0  10  18 1462.33 534.897  -2
   0 -10  17 1462.33 534.897   1
   0  10  17 32574.3 1086.64  -2
   0 -10  16 32574.3 1086.64   1
   0 -10 -16 65569.9 3471.29  -2
   0  10 -15 65569.9 3471.29   1
   0  10  15 11024.0 911.434  -2
   0 -10  14 11024.0 911.434   1
   0  10  14 4728.90 711.132  -2
   0 -10  13 4728.90 711.132   1
   0  10  13 1325.42 617.914  -2
   0 -10  12 1325.42 617.914   1
   0  10  12 42620.1 1638.07  -2
   0 -10  11 42620.1 1638.07   1
   0 -10 -11 892.535 614.895  -2
   0  10 -10 892.535 614.895   1
   0 -10 -10 34651.3 1508.19  -2
   0  10  -9 34651.3 1508.19   1
   0 -10  -9 55229.1 2269.16  -2
   0  10  -8 55229.1 2269.16   1
   0  10   8 59753.2 1877.76  -2
   0 -10   7 59753.2 1877.76   1
   0  10   7 578.151 542.074  -2
   0 -10   6 578.151 542.074   1
   0  10   6 3081.86 745.787  -2
   0 -10   5 3081.86 745.787   1
   0 -10  -5 3494.87 753.538  -2
   0  10  -4 3494.87 753.538   1
   0 -10  -4 6439.58 866.095  -2
   0  10  -3 6439.58 866.095   1
   0  10   3 1499.86 636.416  -2
   0 -10   2 1499.86 636.416   1
   0 -10  -2 1538.74 614.636  -2
   0  10  -1 1538.74 614.636   1
   0 -10  -1 233396. 8274.59  -2
   0  10   0 233396. 8274.59   1
   0 -10   0 179991. 3743.79  -2
   0  10   1 179991. 3743.79   1
   0  10  -1 1776.46 667.796  -2
   0 -10  -2 1776.46 667.796   1
   0  10  -2 388.921 418.249  -2
   0 -10  -3 388.921 418.249   1
   0  10  -3 7313.76 895.516  -2
   0 -10  -4 7313.76 895.516   1
   0  10  -4 3128.59 752.294  -2
   0 -10  -5 3128.59 752.294   1
   0 -10   5 2272.55 758.892  -2
   0  10   6 2272.55 758.892   1
   0  10  -6 1108.69 816.877  -2
   0 -10  -7 1108.69 816.877   1
   0  10  -7 64161.6 2216.26  -2
   0 -10  -8 64161.6 2216.26   1
   0 -10   8 41522.1 1465.96  -2
   0  10   9 41522.1 1465.96   1
   0  10  -9 28371.2 1250.55  -2
   0 -10 -10 28371.2 1250.55   1
   0  10 -10 119.487 187.179  -2
   0 -10 -11 119.487 187.179   1
   0  10 -11 60637.3 1606.56  -2
   0 -10 -12 60637.3 1606.56   1
   0  10 -12 1105.82 631.699  -2
   0 -10 -13 1105.82 631.699   1
   0  10 -13 4214.28 792.413  -2
   0 -10 -14 4214.28 792.413   1
   0  10 -14 12801.9 1094.70  -2
   0 -10 -15 12801.9 1094.70   1
   0  10 -15 86178.8 2861.07  -2
   0 -10 -16 86178.8 2861.07   1
   0  10 -16 33253.3 1426.23  -2
   0 -10 -17 33253.3 1426.23   1
   0  10 -17 1578.88 692.734  -2
   0 -10 -18 1578.88 692.734   1
   0 -10  18 610.660 492.478  -2
   0  10  19 610.660 492.478   1
   0 -10  19 4374.48 499.334  -2
   0  10  20 4374.48 499.334   1
   0  10 -20 8193.54 531.347  -2
   0 -10 -21 8193.54 531.347   1
   0  10 -21 3376.94 416.323  -2
   0 -10 -22 3376.94 416.323   1
   0  10 -22 19990.9 513.351  -2
   0 -10 -23 19990.9 513.351   1
   0  11  22 13959.5 825.047  -2
   0 -11  21 13959.5 825.047   1
   0  11  21 17699.8 3854.21  -2
   0 -11  20 17699.8 3854.21   1
   0  11  20 457.729 346.712  -2
   0 -11  19 457.729 346.712   1
   0 -11 -19 19348.0 3663.42  -2
   0  11 -18 19348.0 3663.42   1
   0 -11 -18 1148.25 467.821  -2
   0  11 -17 1148.25 467.821   1
   0  11  17 2922.93 945.353  -2
   0 -11  16 2922.93 945.353   1
   0 -11 -16 2226.00 595.830  -2
   0  11 -15 2226.00 595.830   1
   0 -11 -15 82759.4 4865.95  -2
   0  11 -14 82759.4 4865.95   1
   0  11  14 1972.45 608.239  -2
   0 -11  13 1972.45 608.239   1
   0  11  13 8471.77 909.595  -2
   0 -11  12 8471.77 909.595   1
   0  11  12 426.993 636.962  -2
   0 -11  11 426.993 636.962   1
   0  11  11 19175.5 1110.23  -2
   0 -11  10 19175.5 1110.23   1
   0  11  10 36496.6 1516.87  -2
   0 -11   9 36496.6 1516.87   1
   0  11   9 83240.2 2160.36  -2
   0 -11   8 83240.2 2160.36   1
   0  11   8 30925.7 1446.79  -2
   0 -11   7 30925.7 1446.79   1
   0  11   7 62795.9 1939.19  -2
   0 -11   6 62795.9 1939.19   1
   0  11   6 13141.4 1156.03  -2
   0 -11   5 13141.4 1156.03   1
   0 -11  -5 27564.5 1337.67  -2
   0  11  -4 27564.5 1337.67   1
   0  11   4 3414.42 910.246  -2
   0 -11   3 3414.42 910.246   1
   0 -11  -3 48672.1 2172.53  -2
   0  11  -2 48672.1 2172.53   1
   0  11   2 36502.6 1692.31  -2
   0 -11   1 36502.6 1692.31   1
   0  11   1 5830.52 684.825  -2
   0 -11   0 5830.52 684.825   1
   0  11   0 6373.55 703.614  -2
   0 -11  -1 6373.55 703.614   1
   0  11  -1 42458.5 1752.10  -2
   0 -11  -2 42458.5 1752.10   1
   0  11   3 25988.1 1171.75   1
   0  11  -2 37779.9 1816.82  -2
   0 -11  -3 37779.9 1816.82   1
   0  11  -3 3502.38 711.480  -2
   0 -11  -4 3502.38 711.480   1
   0  11  -4 37639.6 1430.08  -2
   0 -11  -5 37639.6 1430.08   1
   0  11  -5 9537.44 858.623  -2
   0 -11  -6 9537.44 858.623   1
   0  11  -6 90987.3 2261.13  -2
   0 -11  -7 90987.3 2261.13   1
   0  11  -7 21519.0 1386.18  -2
   0 -11  -8 21519.0 1386.18   1
   0 -11   8 88659.7 1887.68  -2
   0  11   9 88659.7 1887.68   1
   0  11  -9 29415.1 1276.45  -2
   0 -11 -10 29415.1 1276.45   1
   0  11 -10 15299.1 995.503  -2
   0 -11 -11 15299.1 995.503   1
   0  11 -11 170.454 263.394  -2
   0 -11 -12 170.454 263.394   1
   0  11 -12 10695.5 870.511  -2
   0 -11 -13 10695.5 870.511   1
   0  11 -13 4087.92 861.385  -2
   0 -11 -14 4087.92 861.385   1
   0  11 -14 76337.5 6156.59  -2
   0 -11 -15 76337.5 6156.59   1
   0  11 -15 1529.43 664.287  -2
   0 -11 -16 1529.43 664.287   1
   0  11 -16 2430.42 675.831  -2
   0 -11 -17 2430.42 675.831   1
   0 -11  17 2172.97 580.106  -2
   0  11  18 2172.97 580.106   1
   0  11 -18 20645.9 908.339  -2
   0 -11 -19 20645.9 908.339   1
   0 -11  19 760.564 382.681  -2
   0  11  20 760.564 382.681   1
   0  11 -20 27726.8 769.394  -2
   0 -11 -21 27726.8 769.394   1
   0  11 -21 18248.9 1745.36  -2
   0 -11 -22 18248.9 1745.36   1
   0 -12 -20 973.148 800.127  -2
   0  12 -19 973.148 800.127   1
   0  12  19 795.184 603.703  -2
   0 -12  18 795.184 603.703   1
   0  12  18 3316.39 475.309  -2
   0 -12  17 3316.39 475.309   1
   0 -12 -17 466.347 438.388  -2
   0  12 -16 466.347 438.388   1
   0 -12 -16 46763.5 15160.6  -2
   0  12 -15 46763.5 15160.6   1
   0  12  15 664.863 463.428  -2
   0 -12  14 664.863 463.428   1
   0  12  14 3942.18 1163.37  -2
   0 -12  13 3942.18 1163.37   1
   0  12  13 1402.15 582.210  -2
   0 -12  12 1402.15 582.210   1
   0  12  12 60054.0 1767.18  -2
   0 -12  11 60054.0 1767.18   1
   0  12  11 3898.15 309.651  -2
   0 -12  10 3898.15 309.651   1
   0  12  10 57981.0 3433.01  -2
   0 -12   9 57981.0 3433.01   1
   0  12   9 40901.8 1579.54  -2
   0 -12   8 40901.8 1579.54   1
   0 -12  -8 200538. 11495.9  -2
   0  12  -7 200538. 11495.9   1
   0  12   7 53094.9 4575.81  -2
   0 -12   6 53094.9 4575.81   1
   0  12   6 18966.9 1087.91  -2
   0 -12   5 18966.9 1087.91   1
   0  12   5 27099.0 1121.90  -2
   0 -12   4 27099.0 1121.90   1
   0  12   4 359.451 335.005  -2
   0 -12   3 359.451 335.005   1
   0  12   3 2927.29 582.641  -2
   0 -12   2 2927.29 582.641   1
   0  12   2 3744.62 618.161  -2
   0 -12   1 3744.62 618.161   1
   0  12   1 25478.7 1258.29  -2
   0 -12   0 25478.7 1258.29   1
   0  12   0 14439.6 1104.96  -2
   0 -12  -1 14439.6 1104.96   1
   0  12  -1 2690.96 541.088  -2
   0 -12  -2 2690.96 541.088   1
   0  12  -2 3444.26 583.139  -2
   0 -12  -3 3444.26 583.139   1
   0  12  -3 1223.46 497.925  -2
   0 -12  -4 1223.46 497.925   1
   0  12  -4 35879.1 1331.76  -2
   0 -12  -5 35879.1 1331.76   1
   0  12  -5 14020.4 816.923  -2
   0 -12  -6 14020.4 816.923   1
   0  12  -6 44276.9 1469.92  -2
   0 -12  -7 44276.9 1469.92   1
   0  12  -7 149655. 2901.68  -2
   0 -12  -8 149655. 2901.68   1
   0  12  -8 36415.0 1272.95  -2
   0 -12  -9 36415.0 1272.95   1
   0  12  -9 38776.1 4507.67  -2
   0 -12 -10 38776.1 4507.67   1
   0  12 -10 6916.64 768.275  -2
   0 -12 -11 6916.64 768.275   1
   0  12 -11 56183.4 2626.39  -2
   0 -12 -12 56183.4 2626.39   1
   0  12 -12 1075.75 223.784  -2
   0 -12 -13 1075.75 223.784   1
   0  12 -13 4184.71 1046.86  -2
   0 -12 -14 4184.71 1046.86   1
   0  12 -14 688.418 625.374  -2
   0 -12 -15 688.418 625.374   1
   0  12 -15 60761.5 1842.92  -2
   0 -12 -16 60761.5 1842.92   1
   0  12 -16 1007.52 536.126  -2
   0 -12 -17 1007.52 536.126   1
   0  12 -17 3631.45 527.105  -2
   0 -12 -18 3631.45 527.105   1
   0  12 -18 1302.12 376.391  -2
   0 -12 -19 1302.12 376.391   1
   0  12 -19 721.873 312.409  -2
   0 -12 -20 721.873 312.409   1
   0 -13 -19 15300.6 1515.75  -2
   0  13 -18 15300.6 1515.75   1
   0 -13 -18 5637.19 459.306  -2
   0  13 -17 5637.19 459.306   1
   0  13  17 4465.16 457.444  -2
   0 -13  16 4465.16 457.444   1
   0 -13 -16 322.471 156.963  -2
   0  13 -15 322.471 156.963   1
   0 -13 -15 37249.5 21864.9  -2
   0  13 -14 37249.5 21864.9   1
   0 -13 -14 11850.4 1081.54  -2
   0  13 -13 11850.4 1081.54   1
   0 -13 -13 7752.07 744.433  -2
   0  13 -12 7752.07 744.433   1
   0 -13 -12 3709.06 613.822  -2
   0  13 -11 3709.06 613.822   1
   0  13  11 21067.6 1049.32  -2
   0 -13  10 21067.6 1049.32   1
   0  13  10 1162.15 564.641  -2
   0 -13   9 1162.15 564.641   1
   0  13   9 18597.7 1152.33  -2
   0 -13   8 18597.7 1152.33   1
   0  13   8 708.874 565.435  -2
   0 -13   7 708.874 565.435   1
   0  13   7 35030.7 1303.81  -2
   0 -13   6 35030.7 1303.81   1
   0  13   6 17242.9 955.288  -2
   0 -13   5 17242.9 955.288   1
   0  13   5 3031.38 644.306  -2
   0 -13   4 3031.38 644.306   1
   0  13   4 5138.86 779.720  -2
   0 -13   3 5138.86 779.720   1
   0  13   3 96361.6 2164.73  -2
   0 -13   2 96361.6 2164.73   1
   0  13   2 49770.7 1717.56  -2
   0 -13   1 49770.7 1717.56   1
   0  13   1 4617.69 904.364  -2
   0 -13   0 4617.69 904.364   1
   0  13   0 8160.81 737.054  -2
   0 -13  -1 8160.81 737.054   1
   0  13  -1 57646.3 1580.07  -2
   0 -13  -2 57646.3 1580.07   1
   0  13  -2 72575.5 1764.65  -2
   0 -13  -3 72575.5 1764.65   1
   0  13  -3 3883.97 624.330  -2
   0 -13  -4 3883.97 624.330   1
   0  13  -4 3430.38 582.766  -2
   0 -13  -5 3430.38 582.766   1
   0  13  -5 23606.2 1020.58  -2
   0 -13  -6 23606.2 1020.58   1
   0  13  -6 37197.9 1401.36  -2
   0 -13  -7 37197.9 1401.36   1
   0 -13   7 590.498 513.793  -2
   0  13   8 590.498 513.793   1
   0  13  -8 22076.9 1104.31  -2
   0 -13  -9 22076.9 1104.31   1
   0 -13   9 503.084 288.511  -2
   0  13  10 503.084 288.511   1
   0 -13  10 23334.5 1170.15  -2
   0  13  11 23334.5 1170.15   1
   0  13 -11 3879.89 682.501  -2
   0 -13 -12 3879.89 682.501   1
   0  13 -12 14146.5 3180.43  -2
   0 -13 -13 14146.5 3180.43   1
   0  13 -13 13588.4 1064.41  -2
   0 -13 -14 13588.4 1064.41   1
   0  13 -14 52628.4 2859.12  -2
   0 -13 -15 52628.4 2859.12   1
   0  13 -15 941.023 469.702  -2
   0 -13 -16 941.023 469.702   1
   0 -13  16 7454.63 566.181  -2
   0  13  17 7454.63 566.181   1
   0  13 -17 11038.7 585.857  -2
   0 -13 -18 11038.7 585.857   1
   0 -13  18 19875.5 495.457  -2
   0  13  19 19875.5 495.457   1
   0 -14 -16 21100.5 658.189  -2
   0  14 -15 21100.5 658.189   1
   0  14  15 2712.58 382.577  -2
   0 -14  14 2712.58 382.577   1
   0  14  14 1273.26 485.035  -2
   0 -14  13 1273.26 485.035   1
   0 -14 -13 263.509 379.683  -2
   0  14 -12 263.509 379.683   1
   0  14  12 8000.67 633.647  -2
   0 -14  11 8000.67 633.647   1
   0  14  11 3001.31 528.920  -2
   0 -14  10 3001.31 528.920   1
   0  14  10 18124.0 837.781  -2
   0 -14   9 18124.0 837.781   1
   0  14   9 8834.37 761.299  -2
   0 -14   8 8834.37 761.299   1
   0  14   8 58565.0 1491.35  -2
   0 -14   7 58565.0 1491.35   1
   0  14   7 40653.9 4311.84  -2
   0 -14   6 40653.9 4311.84   1
   0  14   6 7892.97 872.846  -2
   0 -14   5 7892.97 872.846   1
   0  14   5 23360.0 1661.42  -2
   0 -14   4 23360.0 1661.42   1
   0  14   4 3507.20 656.615  -2
   0 -14   3 3507.20 656.615   1
   0  14   3 61.0350 193.919  -2
   0 -14   2 61.0350 193.919   1
   0  14   2 24342.9 1008.60  -2
   0 -14   1 24342.9 1008.60   1
   0  14   1 11982.5 991.033  -2
   0 -14   0 11982.5 991.033   1
   0  14   0 15154.5 896.706  -2
   0 -14  -1 15154.5 896.706   1
   0  14  -1 17191.6 941.774  -2
   0 -14  -2 17191.6 941.774   1
   0  14  -2 661.711 487.541  -2
   0 -14  -3 661.711 487.541   1
   0  14  -3 2091.41 345.002  -2
   0 -14  -4 2091.41 345.002   1
   0  14  -4 28522.4 1011.78  -2
   0 -14  -5 28522.4 1011.78   1
   0  14  -5 6529.19 780.941  -2
   0 -14  -6 6529.19 780.941   1
   0  14  -6 50193.3 1489.74  -2
   0 -14  -7 50193.3 1489.74   1
   0  14  -7 50338.0 1623.87  -2
   0 -14  -8 50338.0 1623.87   1
   0  14  -8 13809.1 1007.19  -2
   0 -14  -9 13809.1 1007.19   1
   0  14  -9 12902.2 764.374  -2
   0 -14 -10 12902.2 764.374   1
   0 -14  10 4093.37 554.540  -2
   0  14  11 4093.37 554.540   1
   0  14 -11 9255.79 661.292  -2
   0 -14 -12 9255.79 661.292   1
   0  14 -12 104.674 294.170  -2
   0 -14 -13 104.674 294.170   1
   0  14 -13 1461.53 474.456  -2
   0 -14 -14 1461.53 474.456   1
   0  14 -14 3735.34 687.555  -2
   0 -14 -15 3735.34 687.555   1
   0 -14  15 27632.7 3724.11  -2
   0  14  16 27632.7 3724.11   1
   0  14  17 7927.37 9967.89   1
   0  15  14 36732.5 811.322  -2
   0 -15  13 36732.5 811.322   1
   0  15  13 1761.89 313.885  -2
   0 -15  12 1761.89 313.885   1
   0 -15 -12 3131.00 385.513  -2
   0  15 -11 3131.00 385.513   1
   0 -15 -11 5432.83 456.825  -2
   0  15 -10 5432.83 456.825   1
   0 -15 -10 15679.7 659.487  -2
   0  15  -9 15679.7 659.487   1
   0  15   9 1353.73 423.608  -2
   0 -15   8 1353.73 423.608   1
   0  15   8 9760.62 781.804  -2
   0 -15   7 9760.62 781.804   1
   0  15   7 9460.06 700.085  -2
   0 -15   6 9460.06 700.085   1
   0  15   6 22231.2 1008.36  -2
   0 -15   5 22231.2 1008.36   1
   0  15   5 453.688 346.681  -2
   0 -15   4 453.688 346.681   1
   0  15   4 686.458 630.703  -2
   0 -15   3 686.458 630.703   1
   0  15   3 77141.5 1686.89  -2
   0 -15   2 77141.5 1686.89   1
   0  15   2 37336.8 1326.70  -2
   0 -15   1 37336.8 1326.70   1
   0  15   1 609.184 535.548  -2
   0 -15   0 609.184 535.548   1
   0  15   0 304.556 188.294  -2
   0 -15  -1 304.556 188.294   1
   0  15  -1 46381.4 1359.38  -2
   0 -15  -2 46381.4 1359.38   1
   0  15  -2 51418.6 1422.49  -2
   0 -15  -3 51418.6 1422.49   1
   0  15  -3 26.2106 255.609  -2
   0 -15  -4 26.2106 255.609   1
   0 -15   4 451.842 499.819  -2
   0  15   5 451.842 499.819   1
   0  15  -5 24746.1 955.392  -2
   0 -15  -6 24746.1 955.392   1
   0  15  -6 6826.70 729.364  -2
   0 -15  -7 6826.70 729.364   1
   0 -15   7 6541.61 537.493  -2
   0  15   8 6541.61 537.493   1
   0 -15   8 1027.07 416.681  -2
   0  15   9 1027.07 416.681   1
   0 -15   9 16288.8 791.751  -2
   0  15  10 16288.8 791.751   1
   0  15 -10 5157.29 575.786  -2
   0 -15 -11 5157.29 575.786   1
   0  15 -11 2984.55 496.359  -2
   0 -15 -12 2984.55 496.359   1
   0  15 -12 2965.32 432.311  -2
   0 -15 -13 2965.32 432.311   1
   0  15 -13 53178.2 6864.05  -2
   0 -15 -14 53178.2 6864.05   1
   0  16  10 2093.20 337.596  -2
   0 -16   9 2093.20 337.596   1
   0  16   9 11783.6 466.949  -2
   0 -16   8 11783.6 466.949   1
   0  16   8 7800.77 591.263  -2
   0 -16   7 7800.77 591.263   1
   0  16   7 14364.6 685.561  -2
   0 -16   6 14364.6 685.561   1
   0  16   6 3033.59 398.127  -2
   0 -16   5 3033.59 398.127   1
   0  16   5 17711.1 707.976  -2
   0 -16   4 17711.1 707.976   1
   0  16   4 5646.53 613.383  -2
   0 -16   3 5646.53 613.383   1
   0  16   3 22.4057 413.714  -2
   0 -16   2 22.4057 413.714   1
   0  16   2 20599.9 2432.37  -2
   0 -16   1 20599.9 2432.37   1
   0  16   1 60983.7 5636.18  -2
   0 -16   0 60983.7 5636.18   1
   0  16   0 61835.8 3631.17  -2
   0 -16  -1 61835.8 3631.17   1
   0  16  -1 19096.3 895.637  -2
   0 -16  -2 19096.3 895.637   1
   0 -16   2-27.1562 463.784  -2
   0  16   3-27.1562 463.784   1
   0  16  -3 8617.66 692.072  -2
   0 -16  -4 8617.66 692.072   1
   0  16  -4 17651.3 694.826  -2
   0 -16  -5 17651.3 694.826   1
   0  16  -5 2123.94 407.991  -2
   0 -16  -6 2123.94 407.991   1
   0 -16   6 21663.9 780.347  -2
   0  16   7 21663.9 780.347   1
   0  16  -7 7216.50 526.459  -2
   0 -16  -8 7216.50 526.459   1
   0  16  -8 13671.8 622.289  -2
   0 -16  -9 13671.8 622.289   1
   0  16  -9 2137.89 399.650  -2
   0 -16 -10 2137.89 399.650   1
   0  16  11 667.464 177.122   1
   0  17   4 4843.40 372.236  -2
   0 -17   3 4843.40 372.236   1
   0 -17  -3 6965.21 920.145  -2
   0  17  -2 6965.21 920.145   1
   0 -17  -2 6327.60 599.439  -2
   0  17  -1 6327.60 599.439   1
   0  17   1 4152.49 2159.56  -2
   0 -17   0 4152.49 2159.56   1
   0  17   0 4396.55 1801.17  -2
   0 -17  -1 4396.55 1801.17   1
   0 -17   1 6210.17 415.064  -2
   0  17   2 6210.17 415.064   1
   0  17  -2 5128.91 779.294  -2
   0 -17  -3 5128.91 779.294   1
   0 -17   3 3129.24 937.992  -2
   0  17   4 3129.24 937.992   1
   0  17   5 3395.81 278.054   1
  -1  17  -3 806.775 362.512  -2
   1 -17  -4 806.775 362.512   1
  -1  17  -2 31819.4 4314.59  -2
   1 -17  -3 31819.4 4314.59   1
   1 -17   1 36786.6 828.338  -2
  -1  17   2 36786.6 828.338   1
  -1  17   0 9392.42 1813.33  -2
   1 -17  -1 9392.42 1813.33   1
  -1  17   1 6227.30 1515.96  -2
   1 -17   0 6227.30 1515.96   1
  -1  17   2 38010.8 1526.07  -2
   1 -17   1 38010.8 1526.07   1
  -1  17   3 43611.4 969.709  -2
   1 -17   2 43611.4 969.709   1
  -1  17   4 3788.07 3530.14  -2
   1 -17   3 3788.07 3530.14   1
  -1  16  -9 9842.48 1484.79  -2
   1 -16 -10 9842.48 1484.79   1
  -1  16  -8 9659.59 1194.71  -2
   1 -16  -9 9659.59 1194.71   1
  -1  16  -7 39273.5 18282.9  -2
   1 -16  -8 39273.5 18282.9   1
   1 -16   6 5676.64 482.314  -2
  -1  16   7 5676.64 482.314   1
   1 -16   5 1863.50 392.773  -2
  -1  16   6 1863.50 392.773   1
  -1  16  -4 3492.87 485.685  -2
   1 -16  -5 3492.87 485.685   1
  -1  16  -3 1026.18 360.513  -2
   1 -16  -4 1026.18 360.513   1
  -1  16  -2 304.733 209.681  -2
   1 -16  -3 304.733 209.681   1
  -1  16  -1 494.951 188.491  -2
   1 -16  -2 494.951 188.491   1
  -1  16   0 40151.8 1013.06  -2
   1 -16  -1 40151.8 1013.06   1
  -1  16   1 53773.9 1318.90  -2
   1 -16   0 53773.9 1318.90   1
  -1  16   2 1245.80 456.116  -2
   1 -16   1 1245.80 456.116   1
  -1  16   3 335.026 233.829  -2
   1 -16   2 335.026 233.829   1
  -1  16   4 1171.86 415.991  -2
   1 -16   3 1171.86 415.991   1
  -1  16   5 2941.75 463.994  -2
   1 -16   4 2941.75 463.994   1
  -1  16   6 3391.36 459.046  -2
   1 -16   5 3391.36 459.046   1
  -1  16   7 5151.92 464.859  -2
   1 -16   6 5151.92 464.859   1
  -1  16   8 42512.0 890.878  -2
   1 -16   7 42512.0 890.878   1
  -1  16   9 8526.59 459.362  -2
   1 -16   8 8526.59 459.362   1
  -1  16  10 9675.50 703.032  -2
   1 -16   9 9675.50 703.032   1
   1 -15  13 5295.44 449.960  -2
  -1  15  14 5295.44 449.960   1
  -1  15 -12 2704.19 466.267  -2
   1 -15 -13 2704.19 466.267   1
  -1  15 -11 2446.92 467.449  -2
   1 -15 -12 2446.92 467.449   1
  -1  15 -10 2742.09 974.547  -2
   1 -15 -11 2742.09 974.547   1
  -1  15  -9 8727.60 870.431  -2
   1 -15 -10 8727.60 870.431   1
  -1  15  -8 10616.3 604.917  -2
   1 -15  -9 10616.3 604.917   1
   1 -15   7 4871.07 760.576  -2
  -1  15   8 4871.07 760.576   1
   1 -15   6 18446.9 927.471  -2
  -1  15   7 18446.9 927.471   1
  -1  15  -5 16046.5 662.298  -2
   1 -15  -6 16046.5 662.298   1
  -1  15  -4 12421.0 619.054  -2
   1 -15  -5 12421.0 619.054   1
  -1  15  -3 1513.88 473.177  -2
   1 -15  -4 1513.88 473.177   1
  -1  15  -2 8555.44 802.464  -2
   1 -15  -3 8555.44 802.464   1
  -1  15  -1 29310.1 579.069  -2
   1 -15  -2 29310.1 579.069   1
  -1  15   0 17707.8 826.466  -2
   1 -15  -1 17707.8 826.466   1
  -1  15   1 11067.4 913.018  -2
   1 -15   0 11067.4 913.018   1
  -1  15   2 44086.6 2162.74  -2
   1 -15   1 44086.6 2162.74   1
  -1  15   3 12183.7 874.911  -2
   1 -15   2 12183.7 874.911   1
  -1  15   4 1892.77 566.690  -2
   1 -15   3 1892.77 566.690   1
  -1  15   5 9752.99 1025.67  -2
   1 -15   4 9752.99 1025.67   1
  -1  15   6 17148.4 1034.45  -2
   1 -15   5 17148.4 1034.45   1
  -1  15   7 23455.5 1075.20  -2
   1 -15   6 23455.5 1075.20   1
  -1  15   8 7296.74 607.450  -2
   1 -15   7 7296.74 607.450   1
  -1  15   9 8690.70 598.541  -2
   1 -15   8 8690.70 598.541   1
  -1  15  10 13487.7 203.685  -2
   1 -15   9 13487.7 203.685   1
  -1  15  11 1801.71 348.732  -2
   1 -15  10 1801.71 348.732   1
  -1  15  12 1610.28 325.327  -2
   1 -15  11 1610.28 325.327   1
  -1  15  13 4640.62 383.330  -2
   1 -15  12 4640.62 383.330   1
  -1  15  14 5634.76 1069.80  -2
   1 -15  13 5634.76 1069.80   1
  -1  14 -15 32731.9 7069.50  -2
   1 -14 -16 32731.9 7069.50   1
   1 -14  14 13632.4 1853.86  -2
  -1  14  15 13632.4 1853.86   1
  -1  14 -13 315.800 425.716  -2
   1 -14 -14 315.800 425.716   1
  -1  14 -12 11063.2 1659.83  -2
   1 -14 -13 11063.2 1659.83   1
  -1  14 -11 14931.0 994.447  -2
   1 -14 -12 14931.0 994.447   1
  -1  14 -10 2012.11 584.875  -2
   1 -14 -11 2012.11 584.875   1
  -1  14  -9 1425.00 563.518  -2
   1 -14 -10 1425.00 563.518   1
   1 -14   8 25801.2 1260.22  -2
  -1  14   9 25801.2 1260.22   1
  -1  14  -7 15499.8 983.550  -2
   1 -14  -8 15499.8 983.550   1
   1 -14   6 3722.47 724.560  -2
  -1  14   7 3722.47 724.560   1
  -1  14  -5 3154.26 518.585  -2
   1 -14  -6 3154.26 518.585   1
  -1  14  -4 1124.56 238.299  -2
   1 -14  -5 1124.56 238.299   1
  -1  14  -3 7408.71 723.742  -2
   1 -14  -4 7408.71 723.742   1
  -1  14  -2 4438.40 762.728  -2
   1 -14  -3 4438.40 762.728   1
  -1  14  -1 1120.04 253.933  -2
   1 -14  -2 1120.04 253.933   1
  -1  14   0 90459.0 4681.28  -2
   1 -14  -1 90459.0 4681.28   1
  -1  14   1 148975. 2923.79  -2
   1 -14   0 148975. 2923.79   1
  -1  14   2 1755.98 286.715  -2
   1 -14   1 1755.98 286.715   1
  -1  14   3 4353.03 696.731  -2
   1 -14   2 4353.03 696.731   1
  -1  14   4 9026.25 894.147  -2
   1 -14   3 9026.25 894.147   1
  -1  14   5 1666.35 572.160  -2
   1 -14   4 1666.35 572.160   1
  -1  14   6 4419.12 704.792  -2
   1 -14   5 4419.12 704.792   1
  -1  14   7 4723.08 875.681  -2
   1 -14   6 4723.08 875.681   1
  -1  14   8 19292.4 1181.21  -2
   1 -14   7 19292.4 1181.21   1
  -1  14   9 30376.9 1157.83  -2
   1 -14   8 30376.9 1157.83   1
  -1  14  10 2440.67 509.384  -2
   1 -14   9 2440.67 509.384   1
   1 -14 -11 1902.57 487.450  -2
  -1  14 -10 1902.57 487.450   1
  -1  14  12 12124.7 683.394  -2
   1 -14  11 12124.7 683.394   1
  -1  14  13 11579.4 679.223  -2
   1 -14  12 11579.4 679.223   1
  -1  14  14 573.349 345.116  -2
   1 -14  13 573.349 345.116   1
  -1  14  15 12673.1 593.352  -2
   1 -14  14 12673.1 593.352   1
  -1  14  16 28667.4 3847.85  -2
   1 -14  15 28667.4 3847.85   1
  -1  13 -17 20094.7 575.799  -2
   1 -13 -18 20094.7 575.799   1
  -1  13 -16 640.538 350.965  -2
   1 -13 -17 640.538 350.965   1
  -1  13 -15 4723.90 505.303  -2
   1 -13 -16 4723.90 505.303   1
  -1  13 -14 1417.86 559.417  -2
   1 -13 -15 1417.86 559.417   1
  -1  13 -13 29916.6 3004.46  -2
   1 -13 -14 29916.6 3004.46   1
  -1  13 -12 2205.32 643.624  -2
   1 -13 -13 2205.32 643.624   1
  -1  13 -11 4954.14 2272.53  -2
   1 -13 -12 4954.14 2272.53   1
  -1  13 -10 8914.68 1020.15  -2
   1 -13 -11 8914.68 1020.15   1
  -1  13  -9 70825.2 2056.09  -2
   1 -13 -10 70825.2 2056.09   1
  -1  13  -8 17875.5 801.541  -2
   1 -13  -9 17875.5 801.541   1
  -1  13  -7 24063.8 1128.32  -2
   1 -13  -8 24063.8 1128.32   1
  -1  13  -6 50997.2 1820.09  -2
   1 -13  -7 50997.2 1820.09   1
  -1  13  -5 36087.3 1342.40  -2
   1 -13  -6 36087.3 1342.40   1
  -1  13  -4 26769.3 1194.90  -2
   1 -13  -5 26769.3 1194.90   1
  -1  13  -3 329.928 315.991  -2
   1 -13  -4 329.928 315.991   1
  -1  13  -2 3369.11 592.278  -2
   1 -13  -3 3369.11 592.278   1
  -1  13  -1 26363.3 1111.93  -2
   1 -13  -2 26363.3 1111.93   1
  -1  13   0 13951.3 943.745  -2
   1 -13  -1 13951.3 943.745   1
  -1  13   1 11010.2 823.172  -2
   1 -13   0 11010.2 823.172   1
  -1  13   2 31051.8 1265.13  -2
   1 -13   1 31051.8 1265.13   1
  -1  13   3 4140.99 714.754  -2
   1 -13   2 4140.99 714.754   1
  -1  13   4 1003.93 596.908  -2
   1 -13   3 1003.93 596.908   1
  -1  13   5 21352.3 1185.08  -2
   1 -13   4 21352.3 1185.08   1
  -1  13   6 33793.5 1205.97  -2
   1 -13   5 33793.5 1205.97   1
   1 -13  -7 34618.3 1364.46  -2
  -1  13  -6 34618.3 1364.46   1
   1 -13  -8 33262.9 1220.31  -2
  -1  13  -7 33262.9 1220.31   1
  -1  13   9 14342.5 869.510  -2
   1 -13   8 14342.5 869.510   1
  -1  13  10 92976.0 2305.83  -2
   1 -13   9 92976.0 2305.83   1
   1 -13 -11 8692.53 762.635  -2
  -1  13 -10 8692.53 762.635   1
  -1  13  12 5794.07 608.930  -2
   1 -13  11 5794.07 608.930   1
  -1  13  13 1642.81 462.165  -2
   1 -13  12 1642.81 462.165   1
  -1  13  14 23269.4 877.818  -2
   1 -13  13 23269.4 877.818   1
  -1  13  15 1149.85 410.982  -2
   1 -13  14 1149.85 410.982   1
  -1  13  16 5473.41 563.208  -2
   1 -13  15 5473.41 563.208   1
  -1  13  17 381.588 318.386  -2
   1 -13  16 381.588 318.386   1
  -1  13  18 17647.3 963.330  -2
   1 -13  17 17647.3 963.330   1
   1 -13  18 9157.83 291.778   1
  -1  12 -19 1322.36 292.596  -2
   1 -12 -20 1322.36 292.596   1
   1 -12  18 3134.63 388.020  -2
  -1  12  19 3134.63 388.020   1
  -1  12 -17 1093.95 425.224  -2
   1 -12 -18 1093.95 425.224   1
  -1  12 -16 54665.1 1103.02  -2
   1 -12 -17 54665.1 1103.02   1
  -1  12 -15 8009.41 693.713  -2
   1 -12 -16 8009.41 693.713   1
  -1  12 -14 24121.1 1009.81  -2
   1 -12 -15 24121.1 1009.81   1
  -1  12 -13 337.639 569.279  -2
   1 -12 -14 337.639 569.279   1
  -1  12 -12 11567.0 835.143  -2
   1 -12 -13 11567.0 835.143   1
  -1  12 -11 1901.43 611.803  -2
   1 -12 -12 1901.43 611.803   1
  -1  12 -10 4984.92 611.665  -2
   1 -12 -11 4984.92 611.665   1
  -1  12  -9 3766.02 556.830  -2
   1 -12 -10 3766.02 556.830   1
  -1  12  -8 106066. 1885.35  -2
   1 -12  -9 106066. 1885.35   1
  -1  12  -7 7499.74 693.632  -2
   1 -12  -8 7499.74 693.632   1
  -1  12  -6 48206.8 1342.88  -2
   1 -12  -7 48206.8 1342.88   1
  -1  12  -5 908.846 436.802  -2
   1 -12  -6 908.846 436.802   1
  -1  12  -4 10238.0 718.120  -2
   1 -12  -5 10238.0 718.120   1
  -1  12  -3 8045.38 698.894  -2
   1 -12  -4 8045.38 698.894   1
  -1  12  -2 2091.43 498.934  -2
   1 -12  -3 2091.43 498.934   1
  -1  12  -1 5691.19 648.048  -2
   1 -12  -2 5691.19 648.048   1
  -1  12   0 66518.9 2348.61  -2
   1 -12  -1 66518.9 2348.61   1
  -1  12   1 83152.4 1966.62  -2
   1 -12   0 83152.4 1966.62   1
  -1  12   2 8887.68 835.683  -2
   1 -12   1 8887.68 835.683   1
  -1  12   3 2376.91 579.680  -2
   1 -12   2 2376.91 579.680   1
  -1  12   4 8434.27 781.283  -2
   1 -12   3 8434.27 781.283   1
  -1  12   5 9880.54 808.145  -2
   1 -12   4 9880.54 808.145   1
   1 -12  -6 1811.70 573.731  -2
  -1  12  -5 1811.70 573.731   1
   1 -12  -7 33836.2 1337.56  -2
  -1  12  -6 33836.2 1337.56   1
   1 -12  -8 10585.1 938.401  -2
  -1  12  -7 10585.1 938.401   1
   1 -12  -9 98940.9 2057.22  -2
  -1  12  -8 98940.9 2057.22   1
   1 -12 -10 4396.67 741.937  -2
  -1  12  -9 4396.67 741.937   1
  -1  12  11 4011.48 681.407  -2
   1 -12  10 4011.48 681.407   1
  -1  12  12 1409.20 591.067  -2
   1 -12  11 1409.20 591.067   1
  -1  12  13 9694.03 740.683  -2
   1 -12  12 9694.03 740.683   1
  -1  12  14 618.857 514.090  -2
   1 -12  13 618.857 514.090   1
   1 -12 -15 19585.6 799.050  -2
  -1  12 -14 19585.6 799.050   1
  -1  12  16 8199.02 609.630  -2
   1 -12  15 8199.02 609.630   1
  -1  12  17 62477.2 3991.16  -2
   1 -12  16 62477.2 3991.16   1
   1 -12 -18 750.368 364.690  -2
  -1  12 -17 750.368 364.690   1
   1 -12  18 2388.50 304.536   1
  -1  12  19 3647.29 418.601  -2
   1 -12  18 3647.29 418.601   1
   1 -12  19 640.380 212.330   1
  -1  12  20 1050.97 431.716  -2
   1 -12  19 1050.97 431.716   1
   1 -11 -21 558.593 203.606   1
   1 -11 -20 76.0046 161.127   1
   1 -11 -19 1183.77 223.655   1
   1 -11 -18 8567.52 354.253   1
  -1  11 -17 12158.5 658.429  -2
   1 -11 -18 12158.5 658.429   1
   1 -11  16 4727.71 630.152  -2
  -1  11  17 4727.71 630.152   1
  -1  11 -15 3252.66 658.101  -2
   1 -11 -16 3252.66 658.101   1
  -1  11 -14 17186.8 895.872  -2
   1 -11 -15 17186.8 895.872   1
  -1  11 -13 119508. 2054.90  -2
   1 -11 -14 119508. 2054.90   1
  -1  11 -12 3646.75 669.919  -2
   1 -11 -13 3646.75 669.919   1
  -1  11 -11 7440.98 740.842  -2
   1 -11 -12 7440.98 740.842   1
  -1  11 -10 17266.4 845.420  -2
   1 -11 -11 17266.4 845.420   1
  -1  11  -9 88264.8 1565.34  -2
   1 -11 -10 88264.8 1565.34   1
  -1  11  -8 8230.71 692.101  -2
   1 -11  -9 8230.71 692.101   1
  -1  11  -7 20706.2 823.587  -2
   1 -11  -8 20706.2 823.587   1
  -1  11   7 5272.95 1103.18   1
  -1  11  -6 26512.3 1303.33  -2
   1 -11  -7 26512.3 1303.33   1
  -1  11   6 42835.1 1636.21   1
  -1  11  -5 54281.8 1517.95  -2
   1 -11  -6 54281.8 1517.95   1
  -1  11  -4 3536.42 607.905  -2
   1 -11  -5 3536.42 607.905   1
  -1  11  -3 206.841 319.631  -2
   1 -11  -4 206.841 319.631   1
  -1  11  -2 41895.7 1421.09  -2
   1 -11  -3 41895.7 1421.09   1
  -1  11  -1 54594.8 1578.59  -2
   1 -11  -2 54594.8 1578.59   1
  -1  11   0 34.4133 233.760  -2
   1 -11  -1 34.4133 233.760   1
  -1  11   1 676.337 543.107  -2
   1 -11   0 676.337 543.107   1
  -1  11   2 39748.2 1346.12  -2
   1 -11   1 39748.2 1346.12   1
   1 -11  -3 53958.8 1625.84  -2
  -1  11  -2 53958.8 1625.84   1
  -1  11   4 559.542 515.353  -2
   1 -11   3 559.542 515.353   1
   1 -11  -5 2765.58 633.421  -2
  -1  11  -4 2765.58 633.421   1
  -1  11   6 43902.5 1430.98  -2
   1 -11   5 43902.5 1430.98   1
   1 -11  -7 30709.4 1568.01  -2
  -1  11  -6 30709.4 1568.01   1
  -1  11   8 28207.0 1224.20  -2
   1 -11   7 28207.0 1224.20   1
  -1  11   9 6782.87 779.336  -2
   1 -11   8 6782.87 779.336   1
  -1  11  10 112641. 1960.97  -2
   1 -11   9 112641. 1960.97   1
   1 -11 -11 20057.8 987.565  -2
  -1  11 -10 20057.8 987.565   1
  -1  11  12 9057.66 796.062  -2
   1 -11  11 9057.66 796.062   1
  -1  11  13 2982.11 669.516  -2
   1 -11  12 2982.11 669.516   1
  -1  11  14 86067.2 1458.83  -2
   1 -11  13 86067.2 1458.83   1
   1 -11 -15 12339.1 779.968  -2
  -1  11 -14 12339.1 779.968   1
  -1  11  16 4575.65 639.545  -2
   1 -11  15 4575.65 639.545   1
   1 -11  16 182.291 470.038   1
  -1  11  17 2679.77 488.156  -2
   1 -11  16 2679.77 488.156   1
   1 -11  17 4978.12 408.594   1
  -1  11  18 11308.2 553.825  -2
   1 -11  17 11308.2 553.825   1
   1 -11  18 141.859 227.626   1
   1 -11  19 632.707 219.600   1
   1 -11  20-132.950 180.773   1
   1 -11  21 18514.4 427.754   1
   1 -10 -23 12927.0 935.615   1
  -1  10  22 1697.73 338.037   1
   1 -10 -21 2929.13 239.504   1
   1 -10 -20 5010.00 305.724   1
   1 -10 -19 302.552 218.697   1
   1 -10 -18 390.077 244.111   1
   1 -10 -17 366.865 287.430   1
   1 -10 -16 14862.8 625.566   1
   1 -10 -15 5892.16 413.975   1
  -1  10 -14 11588.2 824.468  -2
   1 -10 -15 11588.2 824.468   1
   1 -10 -14 175.436 321.624   1
  -1  10 -13-410.562 712.675  -2
   1 -10 -14-410.562 712.675   1
   1 -10 -13 8486.18 481.255   1
  -1  10 -12 33826.8 2549.19  -2
   1 -10 -13 33826.8 2549.19   1
   1 -10 -12 9393.99 514.719   1
  -1  10 -11 17398.4 872.077  -2
   1 -10 -12 17398.4 872.077   1
   1 -10 -11 7394.59 448.265   1
  -1  10 -10 7384.32 692.707  -2
   1 -10 -11 7384.32 692.707   1
  -1  10  10 839.460 706.532   1
  -1  10  -9 19474.5 876.428  -2
   1 -10 -10 19474.5 876.428   1
  -1  10   9 73716.1 3013.57   1
  -1  10  -8 82109.3 1392.59  -2
   1 -10  -9 82109.3 1392.59   1
  -1  10   8 25115.1 1481.04   1
  -1  10  -7 96727.8 1412.25  -2
   1 -10  -8 96727.8 1412.25   1
  -1  10   7 102764. 5599.87   1
  -1  10  -6 104509. 1753.80  -2
   1 -10  -7 104509. 1753.80   1
   1 -10  -6 263.756 609.371   1
  -1  10  -5 5807.96 896.948  -2
   1 -10  -6 5807.96 896.948   1
  -1  10   5 33552.8 1307.22   1
  -1  10  -4 57239.8 1980.89  -2
   1 -10  -5 57239.8 1980.89   1
  -1  10   4 28582.8 1171.61   1
  -1  10  -3 33821.9 1561.78  -2
   1 -10  -4 33821.9 1561.78   1
  -1  10   3 894.628 551.614   1
   1 -10   2-35.4512 358.003  -2
  -1  10   3-35.4512 358.003   1
  -1  10  -1 24765.7 1363.16  -2
   1 -10  -2 24765.7 1363.16   1
   1 -10   0 50271.8 1814.42  -2
  -1  10   1 50271.8 1814.42   1
  -1  10   1 42794.9 4089.97  -2
   1 -10   0 42794.9 4089.97   1
   1 -10  -2 31531.8 1484.22  -2
  -1  10  -1 31531.8 1484.22   1
   1 -10  -3 311.557 593.261  -2
  -1  10  -2 311.557 593.261   1
   1 -10  -4 29086.5 3223.88  -2
  -1  10  -3 29086.5 3223.88   1
  -1  10  -4 27785.6 1413.34   1
  -1  10   5 56645.6 1860.35  -2
   1 -10   4 56645.6 1860.35   1
   1 -10  -6 6621.02 936.384  -2
  -1  10  -5 6621.02 936.384   1
  -1  10   7 81618.8 1775.60  -2
   1 -10   6 81618.8 1775.60   1
   1 -10   7 100212. 2707.77   1
  -1  10   8 115153. 2163.89  -2
   1 -10   7 115153. 2163.89   1
   1 -10   8 6823.01 860.650   1
  -1  10   9 67208.4 1779.68  -2
   1 -10   8 67208.4 1779.68   1
   1 -10   9 24666.8 1568.51   1
  -1  10  10 24390.7 990.567  -2
   1 -10   9 24390.7 990.567   1
  -1  10  11 5262.76 625.245  -2
   1 -10  10 5262.76 625.245   1
   1 -10  11 10044.8 838.703   1
  -1  10  12 18955.5 1785.59  -2
   1 -10  11 18955.5 1785.59   1
   1 -10  12 28788.3 1124.45   1
  -1  10  13 40615.7 1759.76  -2
   1 -10  12 40615.7 1759.76   1
  -1  10 -13-34.1646 353.974   1
  -1  10  14 932.958 593.541  -2
   1 -10  13 932.958 593.541   1
   1 -10  14 5331.69 511.842   1
   1 -10  15 6762.40 537.306   1
  -1  10 -16 49538.0 1241.06   1
   1 -10  17 2037.25 363.369   1
  -1  10 -18 1517.84 325.034   1
   1 -10  19 231.332 263.229   1
   1 -10  20 2039.88 259.065   1
   1 -10  21 643.909 201.834   1
   1 -10  22 1494.61 172.712   1
   1  -9 -24 36.4252 154.882   1
   1  -9 -23 18987.6 1120.00   1
  -1   9  22 1794.61 217.337   1
   1  -9 -21 16798.3 466.075   1
  -1   9  20 106.865 220.034   1
   1  -9 -19 307.801 241.906   1
   1  -9 -18 15135.9 575.597   1
   1  -9 -17 24500.8 963.001   1
   1  -9 -16 1172.86 349.771   1
   1  -9 -15 35787.5 1051.48   1
   1  -9 -14 78073.7 1300.55   1
   1  -9 -13 2885.89 358.443   1
   1  -9 -12 245.696 348.032   1
   1  -9 -11 3802.66 407.021   1
   1  -9 -10 5628.03 502.289   1
   1  -9  -9 7567.24 881.966   1
   1  -9  -8 357.213 537.468   1
   1  -9   8 909.082 755.154  -2
  -1   9   8 909.082 755.154   1
  -1   9   7 14720.5 1027.88   1
  -1   9  -7 24128.8 1326.97  -2
   1  -9  -7 24128.8 1326.97   1
   1  -9  -6 4481.09 642.830   1
  -1   9  -6 27793.5 1295.19  -2
   1  -9  -6 27793.5 1295.19   1
  -1   9   5 4491.10 615.097   1
  -1   9  -5 5812.63 825.306  -2
   1  -9  -5 5812.63 825.306   1
   1  -9  -4-69.2676 429.256   1
  -1   9  -4 993.721 572.609  -2
   1  -9  -4 993.721 572.609   1
  -1   9   3 631.374 414.026   1
  -1   9  -3 9223.19 1240.67  -2
   1  -9  -3 9223.19 1240.67   1
  -1   9   2 199159. 2582.88   1
  -1   9  -2 359658. 4121.22  -2
   1  -9  -2 359658. 4121.22   1
  -1   9  -1 17005.8 980.448  -2
   1  -9  -1 17005.8 980.448   1
  -1   9   0 5052.99 661.029  -2
   1  -9   0 5052.99 661.029   1
   1  -9  -1 21414.2 2934.06  -2
  -1   9  -1 21414.2 2934.06   1
  -1   9   2 365177. 4834.58  -2
   1  -9   2 365177. 4834.58   1
   1  -9  -3 7354.94 3288.76  -2
  -1   9  -3 7354.94 3288.76   1
  -1   9  -4 444.705 431.712   1
  -1   9   4 354.001 489.161  -2
   1  -9   4 354.001 489.161   1
  -1   9  -5 1409.16 502.371   1
  -1   9   5 4020.31 660.770  -2
   1  -9   5 4020.31 660.770   1
   1  -9  -6 34523.8 1905.84  -2
  -1   9  -6 34523.8 1905.84   1
  -1   9  -7 11337.1 1048.06   1
  -1   9   7 22426.9 1265.72  -2
   1  -9   7 22426.9 1265.72   1
  -1   9  -8 792.160 608.582   1
  -1   9   8 1199.53 639.787  -2
   1  -9   8 1199.53 639.787   1
   1  -9   9 6082.84 699.201   1
  -1   9   9 11565.1 1058.45  -2
   1  -9   9 11565.1 1058.45   1
   1  -9  10 9733.03 795.494   1
  -1   9  10 15198.1 674.297  -2
   1  -9  10 15198.1 674.297   1
   1  -9  11 218.726 540.225   1
  -1   9  11 3557.32 463.432  -2
   1  -9  11 3557.32 463.432   1
  -1   9 -12 980.992 530.250   1
   1  -9  13 865.102 489.290   1
   1  -9  14 55282.9 1389.99   1
   1  -9  15 1466.93 537.227   1
   1  -9  16 9913.95 639.122   1
   1  -9  17 2485.17 433.732   1
   1  -9  18 17275.0 694.111   1
   1  -9  19 28.0303 273.341   1
  -1   9 -20 51.0929 263.149   1
  -1   9 -21 7478.13 385.214   1
  -1   9 -22 14471.3 389.815   1
   1  -9  23 7274.97 373.970   1
   1  -8 -25 157.197 142.223   1
   1  -8 -24 9446.39 437.331   1
   1  -8 -23 1250.58 235.543   1
   1  -8 -22 1184.98 254.132   1
  -1   8  21 287.410 270.225   1
  -1   8  20 2973.97 345.908   1
   1  -8 -19 2559.51 321.414   1
   1  -8 -18 255.638 280.183   1
  -1   8  17 2316.45 381.440   1
   1  -8 -16 156353. 1710.56   1
   1  -8 -15 372.756 306.449   1
   1  -8 -14 1185.23 387.574   1
   1  -8 -13 3026.80 414.932   1
  -1   8  12 7172.97 512.376   1
  -1   8 -12 16039.4 1346.78  -2
   1  -8 -12 16039.4 1346.78   1
  -1   8  11 19885.5 1574.82   1
  -1   8 -11 53198.1 2034.79  -2
   1  -8 -11 53198.1 2034.79   1
  -1   8  10 1280.68 617.282   1
  -1   8 -10 605.335 738.892  -2
   1  -8 -10 605.335 738.892   1
  -1   8   9 27965.4 2722.51   1
  -1   8  -9 66030.1 2004.29  -2
   1  -8  -9 66030.1 2004.29   1
   1  -8  -8 61256.7 1832.75   1
   1  -8   8 66056.4 2658.31  -2
  -1   8   8 66056.4 2658.31   1
  -1   8  -7 182424. 2957.14  -2
   1  -8  -7 182424. 2957.14   1
  -1   8  -6 253.458 578.085  -2
   1  -8  -6 253.458 578.085   1
   1  -8  -5 41116.1 1418.58   1
  -1   8  -5 55388.6 2927.01  -2
   1  -8  -5 55388.6 2927.01   1
   1  -8  -4 8730.35 714.848   1
   1  -8   4 11340.7 1315.10  -2
  -1   8   4 11340.7 1315.10   1
  -1   8  -3 638.378 556.808  -2
   1  -8  -3 638.378 556.808   1
   1  -8  -2 89.3745 339.868   1
   1  -8   2 245.330 451.786  -2
  -1   8   2 245.330 451.786   1
  -1   8  -1 53319.0 1450.88  -2
   1  -8  -1 53319.0 1450.88   1
  -1   8   0 58640.2 1200.36   1
  -1   8   0 98695.7 2058.52  -2
   1  -8   0 98695.7 2058.52   1
   1  -8  -1 48834.3 1182.38  -2
  -1   8  -1 48834.3 1182.38   1
  -1   8  -2 115.221 381.221   1
  -1   8   2 70.4442 178.446  -2
   1  -8   2 70.4442 178.446   1
   1  -8  -3 1261.36 473.883  -2
  -1   8  -3 1261.36 473.883   1
  -1   8   4 10598.3 1641.90  -2
   1  -8   4 10598.3 1641.90   1
  -1   8   5 48062.0 1518.95  -2
   1  -8   5 48062.0 1518.95   1
  -1   8   6 274.959 569.351  -2
   1  -8   6 274.959 569.351   1
  -1   8   7 206743. 3235.11  -2
   1  -8   7 206743. 3235.11   1
  -1   8  -8 8001.59 841.341   1
  -1   8   8 55226.8 1729.06  -2
   1  -8   8 55226.8 1729.06   1
  -1   8   9 68622.5 2713.43  -2
   1  -8   9 68622.5 2713.43   1
   1  -8 -10 480.450 740.325  -2
  -1   8 -10 480.450 740.325   1
  -1   8 -11 43764.6 1878.29   1
  -1   8  11 56298.3 1963.45  -2
   1  -8  11 56298.3 1963.45   1
  -1   8 -12 13638.4 939.000   1
  -1   8  12 21326.3 842.450  -2
   1  -8  12 21326.3 842.450   1
  -1   8 -13 671.024 609.279   1
  -1   8  13 3314.72 465.634  -2
   1  -8  13 3314.72 465.634   1
   1  -8  14 750.917 482.753   1
   1  -8  15 43646.5 1242.21   1
   1  -8  16 20791.9 976.199   1
   1  -8  17 9863.14 616.597   1
   1  -8  18 294.042 334.543   1
  -1   8 -19 247.748 307.314   1
   1  -8  20 3961.24 401.262   1
   1  -8  21 6211.00 410.736   1
   1  -8  22 323.299 212.076   1
   1  -8  23 39262.6 800.367   1
   1  -8  24 1302.00 256.670   1
  -1   7  25 15539.7 534.547   1
   1  -7 -24-42.2470 235.691   1
   1  -7 -23 23909.2 617.083   1
   1  -7 -22 6081.73 505.809   1
  -1   7  21 25566.3 1392.47   1
   1  -7 -20 919.436 313.277   1
   1  -7 -19 985.462 291.960   1
   1  -7 -18 351.691 288.314   1
  -1   7  17 22075.1 683.840   1
   1  -7 -16 789.281 316.030   1
  -1   7 -16 11328.5 919.913  -2
   1  -7 -16 11328.5 919.913   1
   1  -7 -15 39291.4 1215.24   1
  -1   7 -15 41384.7 1306.16  -2
   1  -7 -15 41384.7 1306.16   1
   1  -7 -14 6696.28 482.921   1
   1  -7  14 120439. 2458.29  -2
  -1   7  14 120439. 2458.29   1
  -1   7  13 5597.71 1394.59   1
  -1   7 -13 10633.8 1153.65  -2
   1  -7 -13 10633.8 1153.65   1
  -1   7 -12 722.113 547.071  -2
   1  -7 -12 722.113 547.071   1
   1  -7  11 9344.57 2194.99  -2
  -1   7  11 9344.57 2194.99   1
   1  -7 -10 2805.91 601.279   1
  -1   7 -10 3739.49 1100.19  -2
   1  -7 -10 3739.49 1100.19   1
   1  -7   9 57261.2 2232.31  -2
  -1   7   9 57261.2 2232.31   1
   1  -7  -8 280.716 368.745   1
  -1   7  -8 2644.08 727.341  -2
   1  -7  -8 2644.08 727.341   1
  -1   7  -7 129125. 2473.81  -2
   1  -7  -7 129125. 2473.81   1
  -1   7  -6 4585.27 676.147  -2
   1  -7  -6 4585.27 676.147   1
  -1   7  -5 27529.8 1162.09  -2
   1  -7  -5 27529.8 1162.09   1
   1  -7   4 3618.73 575.806  -2
  -1   7   4 3618.73 575.806   1
   1  -7  -3 5536.61 579.695   1
   1  -7   3 10584.3 1377.94  -2
  -1   7   3 10584.3 1377.94   1
  -1   7  -2 194116. 2330.02  -2
   1  -7  -2 194116. 2330.02   1
  -1   7  -1 132512. 2210.54  -2
   1  -7  -1 132512. 2210.54   1
   1  -7   0 3619.71 524.556  -2
  -1   7   0 3619.71 524.556   1
   1  -7  -1 138187. 2521.61  -2
  -1   7  -1 138187. 2521.61   1
  -1   7   2 206024. 2687.33  -2
   1  -7   2 206024. 2687.33   1
   1  -7  -3 9488.29 540.962  -2
  -1   7  -3 9488.29 540.962   1
   1  -7  -4 3169.99 595.054  -2
  -1   7  -4 3169.99 595.054   1
  -1   7   5 21778.7 1648.99  -2
   1  -7   5 21778.7 1648.99   1
   1  -7  -6 6220.90 740.744  -2
  -1   7  -6 6220.90 740.744   1
  -1   7   7 100147. 2092.78  -2
   1  -7   7 100147. 2092.78   1
  -1   7   8 1521.78 613.948  -2
   1  -7   8 1521.78 613.948   1
  -1   7   9 48857.9 1602.27  -2
   1  -7   9 48857.9 1602.27   1
   1  -7 -10 6672.17 1533.56  -2
  -1   7 -10 6672.17 1533.56   1
  -1   7  11 7526.52 1342.26  -2
   1  -7  11 7526.52 1342.26   1
  -1   7  12 2855.72 716.634  -2
   1  -7  12 2855.72 716.634   1
   1  -7  13 4287.05 667.484   1
   1  -7 -13 6567.92 1334.42  -2
  -1   7 -13 6567.92 1334.42   1
  -1   7  14 155120. 2060.62  -2
   1  -7  14 155120. 2060.62   1
  -1   7 -15 258.277 813.374   1
  -1   7  15 32028.8 1008.91  -2
   1  -7  15 32028.8 1008.91   1
  -1   7  16 14012.9 815.654  -2
   1  -7  16 14012.9 815.654   1
   1  -7  17 646.719 557.217   1
  -1   7  17 18303.0 712.619  -2
   1  -7  17 18303.0 712.619   1
   1  -7  18 67036.0 1243.14   1
   1  -7  19 1114.33 348.862   1
  -1   7 -20 695.674 315.260   1
   1  -7  21 1334.17 324.033   1
   1  -7  22 20202.3 748.713   1
   1  -7  23 2164.52 398.206   1
   1  -7  24 2355.19 334.192   1
   1  -7  25 2748.80 278.828   1
  -1   6  26 34.9036 148.032   1
   1  -6 -25 9503.13 367.977   1
  -1   6  24 4512.65 349.270   1
  -1   6  23 7263.01 391.237   1
   1  -6 -22 228.419 260.356   1
  -1   6  21 855.742 325.371   1
  -1   6  20 64.3513 495.251   1
  -1   6 -20 138.691 583.671  -2
   1  -6 -20 138.691 583.671   1
   1  -6  19 5019.70 658.455  -2
  -1   6  19 5019.70 658.455   1
  -1   6 -18 2882.94 586.534  -2
   1  -6 -18 2882.94 586.534   1
  -1   6 -17 18246.7 909.695  -2
   1  -6 -17 18246.7 909.695   1
   1  -6  16 147864. 2248.65  -2
  -1   6  16 147864. 2248.65   1
   1  -6  15 34296.0 1402.80  -2
  -1   6  15 34296.0 1402.80   1
  -1   6 -14 4406.51 2017.76  -2
   1  -6 -14 4406.51 2017.76   1
   1  -6  13 14094.5 2379.01  -2
  -1   6  13 14094.5 2379.01   1
   1  -6  12 43018.6 1996.66  -2
  -1   6  12 43018.6 1996.66   1
   1  -6  11 46546.0 1945.67  -2
  -1   6  11 46546.0 1945.67   1
  -1   6 -10 312.102 616.277  -2
   1  -6 -10 312.102 616.277   1
  -1   6  -9 24659.0 1217.60  -2
   1  -6  -9 24659.0 1217.60   1
  -1   6  -8 102107. 2299.68  -2
   1  -6  -8 102107. 2299.68   1
   1  -6   7 91229.5 1938.13  -2
  -1   6   7 91229.5 1938.13   1
  -1   6  -6 1187.18 548.072  -2
   1  -6  -6 1187.18 548.072   1
  -1   6  -5 55506.4 1555.63  -2
   1  -6  -5 55506.4 1555.63   1
  -1   6  -4 6916.90 659.636  -2
   1  -6  -4 6916.90 659.636   1
   1  -6   3 28114.2 1056.19  -2
  -1   6   3 28114.2 1056.19   1
   1  -6   2 2754.36 503.151  -2
  -1   6   2 2754.36 503.151   1
  -1   6  -1 2423.79 484.179  -2
   1  -6  -1 2423.79 484.179   1
   1  -6   0 555677. 5353.87  -2
  -1   6   0 555677. 5353.87   1
  -1   6   1 3374.19 492.813  -2
   1  -6   1 3374.19 492.813   1
   1  -6  -2 1959.32 741.912  -2
  -1   6  -2 1959.32 741.912   1
  -1   6  -3 15049.8 499.524   1
  -1   6   3 29005.6 1279.53  -2
   1  -6   3 29005.6 1279.53   1
   1  -6  -4 10778.3 770.689  -2
  -1   6  -4 10778.3 770.689   1
  -1   6   5 63721.2 1635.67  -2
   1  -6   5 63721.2 1635.67   1
  -1   6   6 1482.84 511.651  -2
   1  -6   6 1482.84 511.651   1
   1  -6  -7 120031. 2330.65  -2
  -1   6  -7 120031. 2330.65   1
   1  -6  -8 96241.2 2624.95  -2
  -1   6  -8 96241.2 2624.95   1
   1  -6  -9 36124.9 1492.76  -2
  -1   6  -9 36124.9 1492.76   1
   1  -6 -10 555.783 636.639  -2
  -1   6 -10 555.783 636.639   1
   1  -6 -11 59732.8 3899.92  -2
  -1   6 -11 59732.8 3899.92   1
   1  -6 -12 44948.6 1765.17  -2
  -1   6 -12 44948.6 1765.17   1
   1  -6 -13 10037.9 1556.46  -2
  -1   6 -13 10037.9 1556.46   1
   1  -6 -14 4493.56 933.434  -2
  -1   6 -14 4493.56 933.434   1
  -1   6  15 34967.5 1135.12  -2
   1  -6  15 34967.5 1135.12   1
  -1   6  16 123509. 1832.46  -2
   1  -6  16 123509. 1832.46   1
  -1   6  17 16577.8 741.163  -2
   1  -6  17 16577.8 741.163   1
  -1   6  18 3273.55 624.163  -2
   1  -6  18 3273.55 624.163   1
  -1   6  19 5398.46 657.497  -2
   1  -6  19 5398.46 657.497   1
  -1   6  20 280.396 232.428  -2
   1  -6  20 280.396 232.428   1
  -1   6  21 14255.5 1718.82  -2
   1  -6  21 14255.5 1718.82   1
   1  -6  22 58.6550 428.379   1
  -1   6  22 341.164 417.481  -2
   1  -6  22 341.164 417.481   1
   1  -6  23 63696.6 1156.55   1
  -1   6  23 64394.8 1101.90  -2
   1  -6  23 64394.8 1101.90   1
   1  -6  24 329.249 312.644   1
   1  -6  25 3407.76 327.552   1
   1  -6  26 194.074 202.572   1
   1  -5 -27 742.138 135.817   1
   1  -5  26 8437.88 572.126  -2
  -1   5  26 8437.88 572.126   1
   1  -5  25 19476.1 624.175  -2
  -1   5  25 19476.1 624.175   1
   1  -5  24 1353.98 427.143  -2
  -1   5  24 1353.98 427.143   1
  -1   5 -23 13433.5 703.170  -2
   1  -5 -23 13433.5 703.170   1
   1  -5  22 44613.4 1101.64  -2
  -1   5  22 44613.4 1101.64   1
  -1   5 -21 31331.1 3476.14  -2
   1  -5 -21 31331.1 3476.14   1
  -1   5 -20 961.957 564.270  -2
   1  -5 -20 961.957 564.270   1
  -1   5 -19 6684.93 668.005  -2
   1  -5 -19 6684.93 668.005   1
  -1   5 -18 47470.5 1213.77  -2
   1  -5 -18 47470.5 1213.77   1
   1  -5  17 11917.6 954.679  -2
  -1   5  17 11917.6 954.679   1
  -1   5 -16 10753.9 1194.55  -2
   1  -5 -16 10753.9 1194.55   1
  -1   5 -15 9256.74 2210.73  -2
   1  -5 -15 9256.74 2210.73   1
   1  -5  14 93032.6 8027.88  -2
  -1   5  14 93032.6 8027.88   1
   1  -5  13 10884.1 1378.71  -2
  -1   5  13 10884.1 1378.71   1
  -1   5 -12 1530.86 883.741  -2
   1  -5 -12 1530.86 883.741   1
  -1   5 -11 25937.3 1941.55  -2
   1  -5 -11 25937.3 1941.55   1
   1  -5  10 19357.8 1419.75  -2
  -1   5  10 19357.8 1419.75   1
   1  -5   9 207827. 3356.41  -2
  -1   5   9 207827. 3356.41   1
   1  -5   8 2051.69 564.419  -2
  -1   5   8 2051.69 564.419   1
  -1   5  -7 203732. 3306.47  -2
   1  -5  -7 203732. 3306.47   1
  -1   5  -6 14990.8 1059.70  -2
   1  -5  -6 14990.8 1059.70   1
  -1   5  -5 67417.9 1912.20  -2
   1  -5  -5 67417.9 1912.20   1
  -1   5  -4 6879.87 784.269  -2
   1  -5  -4 6879.87 784.269   1
  -1   5  -3 4309.12 554.106  -2
   1  -5  -3 4309.12 554.106   1
  -1   5  -2 14249.3 761.847  -2
   1  -5  -2 14249.3 761.847   1
  -1   5  -1 78807.6 1415.93  -2
   1  -5  -1 78807.6 1415.93   1
   1  -5   0 90.0889 331.454  -2
  -1   5   0 90.0889 331.454   1
   1  -5  -1 89998.1 1717.23  -2
  -1   5  -1 89998.1 1717.23   1
  -1   5   2 20976.1 1102.68  -2
   1  -5   2 20976.1 1102.68   1
  -1   5   3 4927.41 451.281  -2
   1  -5   3 4927.41 451.281   1
  -1   5   4 6680.59 694.125  -2
   1  -5   4 6680.59 694.125   1
   1  -5  -5 76426.2 1689.45  -2
  -1   5  -5 76426.2 1689.45   1
   1  -5  -6 18418.8 1165.22  -2
  -1   5  -6 18418.8 1165.22   1
   1  -5  -7 203671. 12482.5  -2
  -1   5  -7 203671. 12482.5   1
   1  -5  -8 1528.66 566.157  -2
  -1   5  -8 1528.66 566.157   1
   1  -5  -9 225104. 3587.85  -2
  -1   5  -9 225104. 3587.85   1
   1  -5 -10 16295.9 1176.53  -2
  -1   5 -10 16295.9 1176.53   1
   1  -5 -11 23461.9 1377.95  -2
  -1   5 -11 23461.9 1377.95   1
   1  -5 -12 1473.06 743.511  -2
  -1   5 -12 1473.06 743.511   1
   1  -5 -13 13993.3 1248.37  -2
  -1   5 -13 13993.3 1248.37   1
   1  -5 -14 110796. 3146.75  -2
  -1   5 -14 110796. 3146.75   1
   1  -5 -15 12012.2 1223.15  -2
  -1   5 -15 12012.2 1223.15   1
  -1   5  16 14920.9 802.341  -2
   1  -5  16 14920.9 802.341   1
  -1   5  17 12137.1 728.032  -2
   1  -5  17 12137.1 728.032   1
  -1   5  18 51607.1 1355.45  -2
   1  -5  18 51607.1 1355.45   1
  -1   5  19 6095.64 576.184  -2
   1  -5  19 6095.64 576.184   1
  -1   5  20 1375.11 449.645  -2
   1  -5  20 1375.11 449.645   1
  -1   5  21 24676.0 851.830  -2
   1  -5  21 24676.0 851.830   1
  -1   5  22 38536.5 954.290  -2
   1  -5  22 38536.5 954.290   1
  -1   5  23 10497.9 1507.87  -2
   1  -5  23 10497.9 1507.87   1
  -1   5  24 957.890 371.866  -2
   1  -5  24 957.890 371.866   1
  -1   5  25 16238.8 497.706  -2
   1  -5  25 16238.8 497.706   1
  -1   5  26 6289.14 300.125  -2
   1  -5  26 6289.14 300.125   1
   1  -4  27 4859.26 328.882  -2
  -1   4  27 4859.26 328.882   1
  -1   4 -26 671.932 324.134  -2
   1  -4 -26 671.932 324.134   1
  -1   4 -25 32712.6 4935.45  -2
   1  -4 -25 32712.6 4935.45   1
   1  -4  24 16029.7 812.685  -2
  -1   4  24 16029.7 812.685   1
  -1   4 -23 79509.6 4155.24  -2
   1  -4 -23 79509.6 4155.24   1
  -1   4 -22 94.8445 490.865  -2
   1  -4 -22 94.8445 490.865   1
  -1   4 -21 19713.3 1263.41  -2
   1  -4 -21 19713.3 1263.41   1
   1  -4  20 3318.09 720.717  -2
  -1   4  20 3318.09 720.717   1
  -1   4 -19 111.368 243.255  -2
   1  -4 -19 111.368 243.255   1
   1  -4  18 4204.88 846.592  -2
  -1   4  18 4204.88 846.592   1
  -1   4 -17 11239.9 1032.06  -2
   1  -4 -17 11239.9 1032.06   1
   1  -4  16 148579. 24651.6  -2
  -1   4  16 148579. 24651.6   1
   1  -4  15 22706.7 6648.47  -2
  -1   4  15 22706.7 6648.47   1
  -1   4 -14 5199.18 1300.33  -2
   1  -4 -14 5199.18 1300.33   1
   1  -4  13 13407.9 2322.77  -2
  -1   4  13 13407.9 2322.77   1
  -1   4 -12 90903.9 7469.78  -2
   1  -4 -12 90903.9 7469.78   1
  -1   4 -11 4750.17 1882.77  -2
   1  -4 -11 4750.17 1882.77   1
   1  -4  10 2386.64 869.564  -2
  -1   4  10 2386.64 869.564   1
   1  -4   9 95894.3 20297.6  -2
  -1   4   9 95894.3 20297.6   1
  -1   4  -8 283759. 25660.2  -2
   1  -4  -8 283759. 25660.2   1
  -1   4  -7 49656.1 1713.83  -2
   1  -4  -7 49656.1 1713.83   1
  -1   4  -6 5177.53 664.864  -2
   1  -4  -6 5177.53 664.864   1
  -1   4   5 4484.34 122.863   1
  -1   4  -5 10464.3 827.804  -2
   1  -4  -5 10464.3 827.804   1
  -1   4  -4 10835.0 810.509  -2
   1  -4  -4 10835.0 810.509   1
   1  -4   3 26681.7 1011.87  -2
  -1   4   3 26681.7 1011.87   1
  -1   4  -2 3931.85 520.347  -2
   1  -4  -2 3931.85 520.347   1
   1  -4   1 29189.9 901.207  -2
  -1   4   1 29189.9 901.207   1
   1  -4   0 311166. 2987.93  -2
  -1   4   0 311166. 2987.93   1
   1  -4  -1 27945.6 1146.12  -2
  -1   4  -1 27945.6 1146.12   1
   1  -4  -2 6054.56 516.343  -2
  -1   4  -2 6054.56 516.343   1
  -1   4   3 26594.8 820.787  -2
   1  -4   3 26594.8 820.787   1
  -1   4   4 17320.1 806.692  -2
   1  -4   4 17320.1 806.692   1
   1  -4  -5 8626.95 879.209  -2
  -1   4  -5 8626.95 879.209   1
   1  -4  -6 7401.11 617.658  -2
  -1   4  -6 7401.11 617.658   1
  -1   4   7 42559.8 2821.65  -2
   1  -4   7 42559.8 2821.65   1
  -1   4   8 349878. 3347.46  -2
   1  -4   8 349878. 3347.46   1
   1  -4  -9 69116.2 13317.7  -2
  -1   4  -9 69116.2 13317.7   1
   1  -4 -10 2249.59 758.713  -2
  -1   4 -10 2249.59 758.713   1
   1  -4 -11 4894.43 931.053  -2
  -1   4 -11 4894.43 931.053   1
   1  -4 -12 80821.0 2814.83  -2
  -1   4 -12 80821.0 2814.83   1
   1  -4 -13 9736.45 1197.87  -2
  -1   4 -13 9736.45 1197.87   1
   1  -4 -14 5052.44 1116.87  -2
  -1   4 -14 5052.44 1116.87   1
   1  -4 -15 19657.1 1679.10  -2
  -1   4 -15 19657.1 1679.10   1
   1  -4 -16 140212. 4658.60  -2
  -1   4 -16 140212. 4658.60   1
  -1   4  17 7997.68 779.473  -2
   1  -4  17 7997.68 779.473   1
   1  -4 -18 5785.28 1333.52  -2
  -1   4 -18 5785.28 1333.52   1
  -1   4  19 838.864 471.776  -2
   1  -4  19 838.864 471.776   1
  -1   4  20 3654.62 901.425  -2
   1  -4  20 3654.62 901.425   1
  -1   4  21 16398.2 1672.77  -2
   1  -4  21 16398.2 1672.77   1
  -1   4  22 573.999 458.428  -2
   1  -4  22 573.999 458.428   1
  -1   4  23 91966.4 4050.14  -2
   1  -4  23 91966.4 4050.14   1
  -1   4  24 17525.1 875.667  -2
   1  -4  24 17525.1 875.667   1
  -1   4  25 27010.1 738.671  -2
   1  -4  25 27010.1 738.671   1
  -1   4  26 604.627 274.183  -2
   1  -4  26 604.627 274.183   1
  -1   4  27 4943.59 373.792  -2
   1  -4  27 4943.59 373.792   1
  -1   3 -27 726.358 275.231  -2
   1  -3 -27 726.358 275.231   1
  -1   3 -26 4040.69 915.923  -2
   1  -3 -26 4040.69 915.923   1
  -1   3 -25 29659.0 5102.58  -2
   1  -3 -25 29659.0 5102.58   1
   1  -3  24 764.697 532.458  -2
  -1   3  24 764.697 532.458   1
   1  -3  23 13802.1 2720.37  -2
  -1   3  23 13802.1 2720.37   1
  -1   3 -22 8749.66 953.122  -2
   1  -3 -22 8749.66 953.122   1
  -1   3 -21 36366.5 1772.38  -2
   1  -3 -21 36366.5 1772.38   1
  -1   3 -20 1710.07 890.566  -2
   1  -3 -20 1710.07 890.566   1
  -1   3 -19 560.784 185.996  -2
   1  -3 -19 560.784 185.996   1
   1  -3  18 14570.4 7774.00  -2
  -1   3  18 14570.4 7774.00   1
  -1   3 -17 3635.83 1146.77  -2
   1  -3 -17 3635.83 1146.77   1
  -1   3 -16 2323.39 999.276  -2
   1  -3 -16 2323.39 999.276   1
   1  -3  15 11945.9 2199.50  -2
  -1   3  15 11945.9 2199.50   1
   1  -3  14 135318. 92586.3  -2
  -1   3  14 135318. 92586.3   1
  -1   3 -13 10301.9 3347.12  -2
   1  -3 -13 10301.9 3347.12   1
   1  -3  12 780.786 890.269  -2
  -1   3  12 780.786 890.269   1
   1  -3  11 18441.0 14606.2  -2
  -1   3  11 18441.0 14606.2   1
  -1   3 -10 96172.2 3161.52  -2
   1  -3 -10 96172.2 3161.52   1
  -1   3  -9 291284. 124670.  -2
   1  -3  -9 291284. 124670.   1
   1  -3   8 4649.00 1557.29  -2
  -1   3   8 4649.00 1557.29   1
  -1   3  -7 119868. 3870.54  -2
   1  -3  -7 119868. 3870.54   1
   1  -3   6 115925. 6905.49  -2
  -1   3   6 115925. 6905.49   1
   1  -3   5 80139.5 4157.13  -2
  -1   3   5 80139.5 4157.13   1
  -1   3  -4 2366.28 226.762  -2
   1  -3  -4 2366.28 226.762   1
   1  -3   3 1220.41 512.248  -2
  -1   3   3 1220.41 512.248   1
   1  -3   2 10538.1 233.623  -2
  -1   3   2 10538.1 233.623   1
   1  -3   1 19840.3 835.990  -2
  -1   3   1 19840.3 835.990   1
   1  -3   0 4137.42 454.372  -2
  -1   3   0 4137.42 454.372   1
  -1   3   1 21518.4 816.677  -2
   1  -3   1 21518.4 816.677   1
  -1   3   2 10022.6 223.480  -2
   1  -3   2 10022.6 223.480   1
   1  -3  -3 1127.63 151.240  -2
  -1   3  -3 1127.63 151.240   1
   1  -3  -4 2429.06 210.201  -2
  -1   3  -4 2429.06 210.201   1
   1  -3  -5 92684.0 1454.69  -2
  -1   3  -5 92684.0 1454.69   1
  -1   3   6 78456.6 19523.2  -2
   1  -3   6 78456.6 19523.2   1
  -1   3   7 146366. 10495.0  -2
   1  -3   7 146366. 10495.0   1
  -1   3   8 6599.53 1094.35  -2
   1  -3   8 6599.53 1094.35   1
   1  -3  -9 419488. 336436.  -2
  -1   3  -9 419488. 336436.   1
  -1   3  10 74543.8 2720.34  -2
   1  -3  10 74543.8 2720.34   1
   1  -3 -11 29049.7 22208.6  -2
  -1   3 -11 29049.7 22208.6   1
   1  -3 -12 1817.97 3221.22  -2
  -1   3 -12 1817.97 3221.22   1
   1  -3 -13 16784.5 2103.57  -2
  -1   3 -13 16784.5 2103.57   1
   1  -3 -14 84092.2 3185.10  -2
  -1   3 -14 84092.2 3185.10   1
   1  -3 -15 11704.8 1832.72  -2
  -1   3 -15 11704.8 1832.72   1
   1  -3 -16 747.762 223.344  -2
  -1   3 -16 747.762 223.344   1
  -1   3  17 3822.07 735.321  -2
   1  -3  17 3822.07 735.321   1
   1  -3 -18 23146.2 2718.07  -2
  -1   3 -18 23146.2 2718.07   1
  -1   3  19 2429.20 703.042  -2
   1  -3  19 2429.20 703.042   1
  -1   3  20 1036.86 913.004  -2
   1  -3  20 1036.86 913.004   1
  -1   3  21 47021.1 4574.25  -2
   1  -3  21 47021.1 4574.25   1
  -1   3  22 23846.9 3185.91  -2
   1  -3  22 23846.9 3185.91   1
  -1   3  23 13568.3 1994.30  -2
   1  -3  23 13568.3 1994.30   1
  -1   3  24 2076.32 920.026  -2
   1  -3  24 2076.32 920.026   1
  -1   3  25 27674.7 2846.92  -2
   1  -3  25 27674.7 2846.92   1
  -1   3  26 4000.70 738.382  -2
   1  -3  26 4000.70 738.382   1
  -1   3  27 848.072 278.741  -2
   1  -3  27 848.072 278.741   1
   1  -2  27 2549.58 321.916  -2
  -1   2  27 2549.58 321.916   1
   1  -2  26 384.715 307.183  -2
  -1   2  26 384.715 307.183   1
   1  -2  25 12387.6 1131.20  -2
  -1   2  25 12387.6 1131.20   1
  -1   2 -24 47387.1 1211.59  -2
   1  -2 -24 47387.1 1211.59   1
  -1   2 -23 68170.3 1367.09  -2
   1  -2 -23 68170.3 1367.09   1
   1  -2  22 3088.00 562.604  -2
  -1   2  22 3088.00 562.604   1
   1  -2  21 10447.7 1165.19  -2
  -1   2  21 10447.7 1165.19   1
  -1   2 -20 36673.5 1144.64  -2
   1  -2 -20 36673.5 1144.64   1
  -1   2 -19 2738.32 915.520  -2
   1  -2 -19 2738.32 915.520   1
  -1   2 -18 2599.11 767.506  -2
   1  -2 -18 2599.11 767.506   1
  -1   2 -17 9574.12 1569.87  -2
   1  -2 -17 9574.12 1569.87   1
  -1   2 -16 321807. 59987.0  -2
   1  -2 -16 321807. 59987.0   1
   1  -2  15 29928.4 2433.47  -2
  -1   2  15 29928.4 2433.47   1
   1  -2  14 11483.5 9230.67  -2
  -1   2  14 11483.5 9230.67   1
   1  -2  13 13433.8 1612.69  -2
  -1   2  13 13433.8 1612.69   1
  -1   2 -12 49107.6 14188.1  -2
   1  -2 -12 49107.6 14188.1   1
   1  -2  11 63668.2 6214.76  -2
  -1   2  11 63668.2 6214.76   1
   1  -2  10 6195.18 1626.74  -2
  -1   2  10 6195.18 1626.74   1
  -1   2  -9 122978. 6484.53  -2
   1  -2  -9 122978. 6484.53   1
  -1   2  -8 144629. 98332.6  -2
   1  -2  -8 144629. 98332.6   1
  -1   2  -7 234635. 58187.3  -2
   1  -2  -7 234635. 58187.3   1
   1  -2   6 1482.08 529.395  -2
  -1   2   6 1482.08 529.395   1
  -1   2  -5 165991. 2738.65  -2
   1  -2  -5 165991. 2738.65   1
   1  -2   4 95064.6 5412.41  -2
  -1   2   4 95064.6 5412.41   1
   1  -2   3 86.0792 417.148  -2
  -1   2   3 86.0792 417.148   1
   1  -2   2 5992.78 515.554  -2
  -1   2   2 5992.78 515.554   1
  -1   2  -1 53990.0 4361.46  -2
   1  -2  -1 53990.0 4361.46   1
  -1   2   0 265598. 4950.42  -2
   1  -2   0 265598. 4950.42   1
   1  -2  -1 46025.7 767.799  -2
  -1   2  -1 46025.7 767.799   1
  -1   2   2 9248.00 269.397  -2
   1  -2   2 9248.00 269.397   1
   1  -2  -3 447.628 326.001  -2
  -1   2  -3 447.628 326.001   1
   1  -2  -4 98692.7 3239.00  -2
  -1   2  -4 98692.7 3239.00   1
   1  -2  -5 147535. 1732.93  -2
  -1   2  -5 147535. 1732.93   1
   1  -2  -6 2047.47 363.033  -2
  -1   2  -6 2047.47 363.033   1
   1  -2  -7 172197. 21746.9  -2
  -1   2  -7 172197. 21746.9   1
  -1   2   8 155024. 20460.6  -2
   1  -2   8 155024. 20460.6   1
   1  -2  -9 104019. 2977.54  -2
  -1   2  -9 104019. 2977.54   1
   1  -2 -10 4431.90 1428.60  -2
  -1   2 -10 4431.90 1428.60   1
   1  -2 -11 48709.3 2862.31  -2
  -1   2 -11 48709.3 2862.31   1
   1  -2 -12 68086.6 2904.97  -2
  -1   2 -12 68086.6 2904.97   1
   1  -2 -13 10937.9 2901.42  -2
  -1   2 -13 10937.9 2901.42   1
   1  -2 -14 17934.2 2175.65  -2
  -1   2 -14 17934.2 2175.65   1
   1  -2 -15 35020.8 1929.28  -2
  -1   2 -15 35020.8 1929.28   1
   1  -2 -16 290608. 6515.98  -2
  -1   2 -16 290608. 6515.98   1
   1  -2 -17 13916.1 1599.39  -2
  -1   2 -17 13916.1 1599.39   1
   1  -2 -18 3241.80 774.826  -2
  -1   2 -18 3241.80 774.826   1
  -1   2  19 588.177 1412.62  -2
   1  -2  19 588.177 1412.62   1
  -1   2  20 3054.32 10785.5  -2
   1  -2  20 3054.32 10785.5   1
  -1   2  21 1360.10 5116.83  -2
   1  -2  21 1360.10 5116.83   1
  -1   2  22 2930.19 569.434  -2
   1  -2  22 2930.19 569.434   1
  -1   2  23 17764.6 23312.6  -2
   1  -2  23 17764.6 23312.6   1
  -1   2  24 24449.3 8253.10  -2
   1  -2  24 24449.3 8253.10   1
  -1   2  25 7219.26 2886.06  -2
   1  -2  25 7219.26 2886.06   1
  -1   2  26 111.915 131.058  -2
   1  -2  26 111.915 131.058   1
  -1   2  27 1962.97 306.348  -2
   1  -2  27 1962.97 306.348   1
   1  -2  28 7248.10 299.385   1
   1  -1  28 212.861 273.368  -2
  -1   1  28 212.861 273.368   1
  -1   1 -27 222.068 376.367  -2
   1  -1 -27 222.068 376.367   1
   1  -1  26 1654.79 317.377  -2
  -1   1  26 1654.79 317.377   1
   1  -1  25 34408.1 790.417  -2
  -1   1  25 34408.1 790.417   1
  -1   1 -24 126.831 430.999  -2
   1  -1 -24 126.831 430.999   1
   1  -1  23 32914.8 1064.44  -2
  -1   1  23 32914.8 1064.44   1
  -1   1 -22 8290.36 705.803  -2
   1  -1 -22 8290.36 705.803   1
   1  -1  21 61225.1 2198.15  -2
  -1   1  21 61225.1 2198.15   1
  -1   1 -20 230.193 351.025  -2
   1  -1 -20 230.193 351.025   1
  -1   1 -19 2155.91 633.364  -2
   1  -1 -19 2155.91 633.364   1
  -1   1 -18 80616.5 2367.93  -2
   1  -1 -18 80616.5 2367.93   1
   1  -1  17 46916.5 2603.33  -2
  -1   1  17 46916.5 2603.33   1
   1  -1  16 6886.38 1726.71  -2
  -1   1  16 6886.38 1726.71   1
   1  -1  15 16842.1 1618.73  -2
  -1   1  15 16842.1 1618.73   1
  -1   1 -14 284280. 5030.99  -2
   1  -1 -14 284280. 5030.99   1
   1  -1  13 13497.8 1289.93  -2
  -1   1  13 13497.8 1289.93   1
  -1   1 -12 1104.74 878.547  -2
   1  -1 -12 1104.74 878.547   1
  -1   1 -11 1347.92 1195.97  -2
   1  -1 -11 1347.92 1195.97   1
   1  -1  10 2204.47 2672.89  -2
  -1   1  10 2204.47 2672.89   1
  -1   1  -9 60464.8 2159.89  -2
   1  -1  -9 60464.8 2159.89   1
  -1   1  -8 1988.44 836.780  -2
   1  -1  -8 1988.44 836.780   1
  -1   1  -7 47596.1 1730.53  -2
   1  -1  -7 47596.1 1730.53   1
  -1   1  -6 362805. 3953.86  -2
   1  -1  -6 362805. 3953.86   1
  -1   1  -5 8596.15 744.441  -2
   1  -1  -5 8596.15 744.441   1
  -1   1  -4 1506.56 458.934  -2
   1  -1  -4 1506.56 458.934   1
  -1   1  -3 754.676 324.830  -2
   1  -1  -3 754.676 324.830   1
  -1   1  -2 395968. 46225.0  -2
   1  -1  -2 395968. 46225.0   1
   1  -1  -1 6116.32 222.997   1
  -1   1  -1 8724.39 372.526  -2
   1  -1  -1 8724.39 372.526   1
   1  -1   0 7477.16 226.793   1
  -1   1   0 13086.9 551.186  -2
   1  -1   0 13086.9 551.186   1
  -1   1  -1 2678.25 169.796   1
   1  -1  -2 433414. 14408.3  -2
  -1   1  -2 433414. 14408.3   1
   1  -1  -3 1181.74 270.968  -2
  -1   1  -3 1181.74 270.968   1
   1  -1  -4 1287.83 478.668  -2
  -1   1  -4 1287.83 478.668   1
  -1   1   5 11853.1 1043.66  -2
   1  -1   5 11853.1 1043.66   1
   1  -1  -6 313161. 3003.38  -2
  -1   1  -6 313161. 3003.38   1
  -1   1   7 71545.3 2069.23  -2
   1  -1   7 71545.3 2069.23   1
  -1   1   8 2873.15 692.787  -2
   1  -1   8 2873.15 692.787   1
   1  -1  -9 67327.3 4005.33  -2
  -1   1  -9 67327.3 4005.33   1
  -1   1  10 2521.34 566.298  -2
   1  -1  10 2521.34 566.298   1
   1  -1 -11 1332.05 833.786  -2
  -1   1 -11 1332.05 833.786   1
   1  -1 -12 367.357 781.081  -2
  -1   1 -12 367.357 781.081   1
  -1   1  13 15249.2 1663.79  -2
   1  -1  13 15249.2 1663.79   1
   1  -1 -14 238850. 4752.38  -2
  -1   1 -14 238850. 4752.38   1
   1  -1 -15 17115.6 1683.81  -2
  -1   1 -15 17115.6 1683.81   1
   1  -1 -16 6853.88 1704.84  -2
  -1   1 -16 6853.88 1704.84   1
   1  -1 -17 57355.6 2628.85  -2
  -1   1 -17 57355.6 2628.85   1
   1  -1 -18 71507.3 2288.75  -2
  -1   1 -18 71507.3 2288.75   1
  -1   1  19 2255.85 651.114  -2
   1  -1  19 2255.85 651.114   1
  -1   1  20 411.968 475.664  -2
   1  -1  20 411.968 475.664   1
  -1   1  21 60968.2 1481.94  -2
   1  -1  21 60968.2 1481.94   1
  -1   1  22 6847.25 688.082  -2
   1  -1  22 6847.25 688.082   1
  -1   1  23 28724.9 1046.23  -2
   1  -1  23 28724.9 1046.23   1
  -1   1  24 310.051 412.200  -2
   1  -1  24 310.051 412.200   1
  -1   1  25 33049.0 894.525  -2
   1  -1  25 33049.0 894.525   1
  -1   1  26 1355.98 324.497  -2
   1  -1  26 1355.98 324.497   1
  -1   1  27 588.766 244.714  -2
   1  -1  27 588.766 244.714   1
  -1   1  28 64.7025 82.5352  -2
   1  -1  28 64.7025 82.5352   1
  -1   0  28 7851.75 334.972   1
  -1   0  27 3465.49 317.094   1
  -1   0 -26 80.4382 273.164  -2
   1   0 -26 80.4382 273.164   1
  -1   0  25 1122.80 322.201   1
  -1   0 -25 2245.90 502.681  -2
   1   0 -25 2245.90 502.681   1
  -1   0 -24 31239.3 800.795  -2
   1   0 -24 31239.3 800.795   1
  -1   0 -23 36775.6 933.132  -2
   1   0 -23 36775.6 933.132   1
   1   0  22 1770.59 498.110  -2
  -1   0  22 1770.59 498.110   1
   1   0  21 10292.2 673.798  -2
  -1   0  21 10292.2 673.798   1
   1   0  20 384.109 464.617  -2
  -1   0  20 384.109 464.617   1
  -1   0 -19 3262.08 586.938  -2
   1   0 -19 3262.08 586.938   1
  -1   0 -18 7077.77 754.684  -2
   1   0 -18 7077.77 754.684   1
   1   0  17 16449.6 1302.53  -2
  -1   0  17 16449.6 1302.53   1
  -1   0 -16 210901. 5230.27  -2
   1   0 -16 210901. 5230.27   1
   1   0  15 28238.5 1434.67  -2
  -1   0  15 28238.5 1434.67   1
  -1   0 -14 1300.35 726.164  -2
   1   0 -14 1300.35 726.164   1
  -1   0 -13 387.812 706.595  -2
   1   0 -13 387.812 706.595   1
  -1   0 -12 22727.3 1493.20  -2
   1   0 -12 22727.3 1493.20   1
  -1   0 -11 33203.2 1540.19  -2
   1   0 -11 33203.2 1540.19   1
   1   0  10 4596.76 860.264  -2
  -1   0  10 4596.76 860.264   1
  -1   0  -9 62328.3 1763.70  -2
   1   0  -9 62328.3 1763.70   1
  -1   0  -8 26189.2 1306.20  -2
   1   0  -8 26189.2 1306.20   1
  -1   0  -7 323991. 3493.00  -2
   1   0  -7 323991. 3493.00   1
  -1   0  -6 696.231 740.220  -2
   1   0  -6 696.231 740.220   1
  -1   0  -5 219053. 2332.37  -2
   1   0  -5 219053. 2332.37   1
  -1   0   4 592.817 113.806   1
  -1   0  -4 1902.56 546.390  -2
   1   0  -4 1902.56 546.390   1
  -1   0   3 8067.57 199.807   1
  -1   0  -3 10899.6 555.965  -2
   1   0  -3 10899.6 555.965   1
  -1   0   2 298.691 126.145   1
  -1   0  -2 1073.68 280.659  -2
   1   0  -2 1073.68 280.659   1
   1   0  -1 99644.5 728.699   1
   1   0   0 290.408 107.337   1
   1   0   0 1020.15 311.374  -2
  -1   0   0 1020.15 311.374   1
  -1   0  -1 58420.6 778.823   1
   1   0  -1 136421. 995.389  -2
  -1   0  -1 136421. 995.389   1
   1   0   2 634.229 102.145   1
   1   0  -2 909.150 354.411  -2
  -1   0  -2 909.150 354.411   1
   1   0  -3 9971.82 403.394  -2
  -1   0  -3 9971.82 403.394   1
  -1   0   4 2192.03 579.847  -2
   1   0   4 2192.03 579.847   1
   1   0  -5 213087. 1862.55  -2
  -1   0  -5 213087. 1862.55   1
   1   0  -6 542.058 678.494  -2
  -1   0  -6 542.058 678.494   1
  -1   0  -7 205053. 2106.11   1
  -1   0   7 339928. 3097.59  -2
   1   0   7 339928. 3097.59   1
   1   0  -8 31103.2 1245.46  -2
  -1   0  -8 31103.2 1245.46   1
  -1   0   9 52811.1 1563.39  -2
   1   0   9 52811.1 1563.39   1
   1   0 -10 5168.60 878.175  -2
  -1   0 -10 5168.60 878.175   1
   1   0 -11 31708.3 1432.21  -2
  -1   0 -11 31708.3 1432.21   1
   1   0 -12 33930.6 1541.01  -2
  -1   0 -12 33930.6 1541.01   1
   1   0 -13 838.231 829.953  -2
  -1   0 -13 838.231 829.953   1
  -1   0  14 1731.37 856.764  -2
   1   0  14 1731.37 856.764   1
   1   0 -15 34613.9 1677.80  -2
  -1   0 -15 34613.9 1677.80   1
   1   0 -16 210121. 7710.02  -2
  -1   0 -16 210121. 7710.02   1
   1   0 -17 16328.4 1263.47  -2
  -1   0 -17 16328.4 1263.47   1
  -1   0  18 8324.45 686.873  -2
   1   0  18 8324.45 686.873   1
  -1   0  19 2640.48 542.427  -2
   1   0  19 2640.48 542.427   1
  -1   0  20 408.235 486.448  -2
   1   0  20 408.235 486.448   1
  -1   0  21 9769.21 651.792  -2
   1   0  21 9769.21 651.792   1
  -1   0  22 1448.63 626.756  -2
   1   0  22 1448.63 626.756   1
  -1   0  23 37055.1 991.844  -2
   1   0  23 37055.1 991.844   1
  -1   0  24 28406.0 1043.08  -2
   1   0  24 28406.0 1043.08   1
  -1   0  25 1508.60 407.089  -2
   1   0  25 1508.60 407.089   1
   1   0  26-138.612 282.630   1
   1   0  27 171.264 237.915   1
   1   0  28 15671.7 397.602   1
  -1  -1  28 83.8381 190.754   1
  -1  -1  27-118.732 238.407   1
  -1  -1  26 3201.68 383.303   1
   1   1 -25 20744.5 804.398   1
  -1  -1  24 210.064 250.162   1
  -1  -1  23 28077.3 728.170   1
   1   1 -22 927.331 317.498   1
   1   1 -21 25747.6 936.517   1
  -1  -1  20 2816.68 545.933   1
  -1  -1 -20 3739.50 543.189  -2
   1   1 -20 3739.50 543.189   1
   1   1 -19 92.2759 301.372   1
  -1  -1 -19 1162.86 476.516  -2
   1   1 -19 1162.86 476.516   1
   1   1 -18 28280.9 1235.02   1
  -1  -1 -18 104389. 2594.22  -2
   1   1 -18 104389. 2594.22   1
   1   1 -17 26726.9 2268.09   1
   1   1 -16 5674.85 622.467   1
  -1  -1  15 46641.8 4321.05   1
  -1  -1 -15 52554.3 1713.50  -2
   1   1 -15 52554.3 1713.50   1
  -1  -1  14 50740.2 5303.78   1
  -1  -1 -14 225394. 6830.87  -2
   1   1 -14 225394. 6830.87   1
  -1  -1  13 10824.9 1582.10   1
  -1  -1 -13 14645.9 1130.34  -2
   1   1 -13 14645.9 1130.34   1
   1   1 -12 40.7398 350.641   1
   1   1  12 3461.90 564.187  -2
  -1  -1  12 3461.90 564.187   1
   1   1  11 8357.38 2105.44  -2
  -1  -1  11 8357.38 2105.44   1
  -1  -1 -10 8767.24 2170.08  -2
   1   1 -10 8767.24 2170.08   1
   1   1  -9 102244. 1753.13   1
   1   1   9 90603.0 1858.78  -2
  -1  -1   9 90603.0 1858.78   1
  -1  -1  -8 5060.74 753.813  -2
   1   1  -8 5060.74 753.813   1
   1   1   7 36095.2 3037.57  -2
  -1  -1   7 36095.2 3037.57   1
   1   1   6 1780.53 615.377  -2
  -1  -1   6 1780.53 615.377   1
  -1  -1   5 4705.48 395.312   1
  -1  -1  -5 11690.9 714.043  -2
   1   1  -5 11690.9 714.043   1
  -1  -1   4 11.4055 297.912   1
   1   1   4 186.666 459.331  -2
  -1  -1   4 186.666 459.331   1
   1   1  -3 16740.8 492.808   1
   1   1   3 25599.2 656.772  -2
  -1  -1   3 25599.2 656.772   1
  -1  -1   2 383401. 5425.50   1
   1   1  -1 7271.13 372.725   1
  -1  -1   0 4500.83 200.194   1
  -1  -1  -1 5617.62 230.043   1
   1   1  -1 11225.1 464.938  -2
  -1  -1  -1 11225.1 464.938   1
   1   1   2 389864. 1564.06   1
   1   1  -2 672416. 2707.60  -2
  -1  -1  -2 672416. 2707.60   1
   1   1   3 9641.51 389.811   1
   1   1  -3 22334.8 597.079  -2
  -1  -1  -3 22334.8 597.079   1
  -1  -1  -4 89.6699 259.110   1
  -1  -1   4 117.462 184.871  -2
   1   1   4 117.462 184.871   1
   1   1   5 8295.51 486.794   1
   1   1  -5 12600.7 844.221  -2
  -1  -1  -5 12600.7 844.221   1
   1   1   6 1488.74 363.313   1
   1   1  -6 2469.68 684.909  -2
  -1  -1  -6 2469.68 684.909   1
  -1  -1  -7 3363.97 646.391   1
  -1  -1   7 26750.2 1101.60  -2
   1   1   7 26750.2 1101.60   1
  -1  -1  -8 7380.86 554.920   1
  -1  -1   8 7487.73 931.796  -2
   1   1   8 7487.73 931.796   1
  -1  -1  -9 2153.68 787.063   1
  -1  -1   9 75743.5 1887.57  -2
   1   1   9 75743.5 1887.57   1
  -1  -1 -10 12501.6 819.430   1
   1   1 -10 12730.7 1090.54  -2
  -1  -1 -10 12730.7 1090.54   1
  -1  -1 -11 2116.05 557.335   1
  -1  -1  11 9185.08 1056.07  -2
   1   1  11 9185.08 1056.07   1
  -1  -1 -12 3140.63 547.759   1
  -1  -1  12 4282.74 924.556  -2
   1   1  12 4282.74 924.556   1
   1   1  13 1263.90 507.561   1
   1   1  14 231076. 4103.79   1
   1   1 -14 299795. 15122.1  -2
  -1  -1 -14 299795. 15122.1   1
   1   1  15 403.056 578.094   1
   1   1 -15 29751.6 1838.61  -2
  -1  -1 -15 29751.6 1838.61   1
   1   1  16 13900.5 867.846   1
  -1  -1 -17 7378.26 1090.65   1
  -1  -1 -18 90795.5 2090.60   1
  -1  -1  18 118942. 5457.65  -2
   1   1  18 118942. 5457.65   1
  -1  -1 -19 738.302 523.107   1
  -1  -1  19 818.168 498.940  -2
   1   1  19 818.168 498.940   1
   1   1  20 314.067 318.270   1
   1   1  21 20149.9 943.505   1
  -1  -1 -22 7968.38 598.354   1
   1   1  23 12940.6 554.411   1
   1   1  24 1007.69 422.146   1
   1   1  25 10278.9 594.877   1
   1   1  26 574.558 299.730   1
   1   1  27 82.9450 241.350   1
   1   1  28 1773.16 223.877   1
  -1  -2  27-57.9574 223.313   1
  -1  -2  26 18.3744 282.976   1
  -1  -2  25 3903.12 460.185   1
  -1  -2  24 22658.1 769.832   1
  -1  -2  23 823.070 496.316   1
   1   2 -22-77.9377 287.272   1
   1   2 -21 815.567 305.878   1
  -1  -2  20 257.239 267.667   1
  -1  -2  19 4850.65 376.464   1
  -1  -2  18 344.879 318.802   1
   1   2 -17 1190.23 411.321   1
   1   2 -16 185366. 2965.29   1
   1   2 -15 565.351 457.221   1
   1   2 -14 753.098 374.187   1
  -1  -2  13 5478.27 638.331   1
  -1  -2  12 47817.7 5105.02   1
  -1  -2  11 42952.7 2210.69   1
   1   2 -10 2728.33 629.704   1
   1   2  -9 49653.5 2316.34   1
  -1  -2   8 171622. 5906.20   1
   1   2  -7 72857.4 1522.78   1
   1   2  -6 830.822 421.362   1
  -1  -2   5 64149.1 1299.36   1
  -1  -2   4 50651.5 1743.49   1
  -1  -2   3 3040.06 371.763   1
   1   2  -2 7244.94 382.370   1
  -1  -2   1 40978.0 672.446   1
   1   2   0 68350.7 871.521   1
   1   2   1 20349.1 436.145   1
  -1  -2  -2 1070.45 210.179   1
   1   2  -2 6954.49 594.789  -2
  -1  -2  -2 6954.49 594.789   1
   1   2   3 3428.07 345.184   1
   1   2  -3 6377.94 613.880  -2
  -1  -2  -3 6377.94 613.880   1
  -1  -2  -4 33704.9 689.476   1
   1   2  -4 75279.2 1305.80  -2
  -1  -2  -4 75279.2 1305.80   1
  -1  -2  -5 74016.2 1148.51   1
  -1  -2   5 125655. 1565.59  -2
   1   2   5 125655. 1565.59   1
  -1  -2  -6 198.929 265.881   1
  -1  -2  -7 271853. 2365.20   1
  -1  -2  -8 38126.8 1191.90   1
  -1  -2  -9 124489. 2138.42   1
   1   2  10 6214.42 549.857   1
   1   2  11 46483.3 1584.05   1
  -1  -2 -12 45478.6 1616.56   1
  -1  -2 -13 129.228 477.166   1
  -1  -2 -14 321.366 478.709   1
   1   2  15 44013.0 1949.13   1
   1   2  16 3474.33 745.994   1
  -1  -2 -17 3778.93 610.427   1
   1   2  18 119.635 409.558   1
   1   2  19 4462.37 449.344   1
   1   2  20 1517.08 360.932   1
   1   2  21 19951.9 947.089   1
   1   2  22 1049.75 340.116   1
  -1  -2 -23 61652.6 1004.04   1
   1   2  24 5197.07 387.094   1
   1   2  25 6581.30 377.377   1
   1   2  26-40.8253 299.002   1
   1   2  27 3027.47 422.942   1
   1   2  28 2240.61 221.665   1
  -1  -3  27 1350.54 238.535   1
  -1  -3  26 8961.79 458.943   1
  -1  -3  25 35861.7 871.559   1
  -1  -3  24 152.948 360.243   1
  -1  -3  23 20561.8 791.381   1
  -1  -3  22 8744.79 668.874   1
  -1  -3  21 27939.9 995.535   1
  -1  -3  20 4670.55 749.735   1
  -1  -3  19 1115.41 502.420   1
  -1  -3  18 3622.78 476.666   1
   1   3 -17 7616.38 728.450   1
   1   3 -16-531.969 993.997   1
   1   3 -15 10576.6 841.363   1
   1   3 -14 1832.59 506.492   1
   1   3 -13 874.928 468.877   1
  -1  -3  12 111.019 402.519   1
  -1  -3  11 18290.6 1496.91   1
  -1  -3  10 5146.14 633.973   1
  -1  -3   9 182083. 7392.09   1
   1   3  -8 617.815 457.342   1
  -1  -3   7 236326. 10259.3   1
  -1  -3   6 2285.84 459.746   1
  -1  -3   5 36846.8 1484.74   1
   1   3  -4 2141.49 426.015   1
  -1  -3   3 2420.34 399.320   1
   1   3  -2 23545.4 767.425   1
   1   3  -1 540.159 276.741   1
  -1  -3   0 1500.58 287.495   1
  -1  -3  -1 12000.1 435.287   1
  -1  -3  -2 57275.4 822.222   1
  -1  -3  -3 123.509 293.883   1
  -1  -3  -4 334.835 288.436   1
  -1  -3  -5 57497.0 1087.51   1
   1   3   6 67033.4 1398.69   1
  -1  -3  -7 73970.3 1267.98   1
  -1  -3  -8 7257.84 644.300   1
  -1  -3  -9 114152. 1931.41   1
   1   3  10 3670.96 561.928   1
  -1  -3 -11 134.846 530.462   1
  -1  -3 -12 542.348 540.053   1
  -1  -3 -13 4813.92 688.377   1
   1   3  14 225554. 3769.50   1
  -1  -3 -15 262.947 471.437   1
  -1  -3 -16 6911.03 794.785   1
   1   3  17 120.725 546.835   1
   1   3  18 38310.5 1522.11   1
  -1  -3 -19 108.784 303.432   1
  -1  -3 -20 475.481 274.553   1
   1   3  21 1033.80 337.981   1
   1   3  22 17601.1 614.641   1
   1   3  23 1121.08 306.327   1
   1   3  24 2518.88 350.487   1
  -1  -3 -25 228.215 259.264   1
  -1  -3 -26 994.902 210.488   1
   1   3  27 134.504 228.481   1
   1   3  28 1125.65 195.902   1
  -1  -4  27 844.367 204.525   1
  -1  -4  26 87.9827 254.693   1
  -1  -4  25 15448.9 598.453   1
  -1  -4  24 7094.01 566.160   1
  -1  -4  23 31795.7 1577.84   1
  -1  -4  22 200.217 463.937   1
  -1  -4  21 8656.61 769.312   1
  -1  -4  20 331.381 477.552   1
  -1  -4  19 1707.50 505.492   1
  -1  -4  18 3933.38 571.760   1
   1   4 -17 4503.91 610.738   1
  -1  -4  16 90285.9 1885.81   1
   1   4 -15 14726.4 992.787   1
   1   4 -14 5635.62 731.828   1
   1   4 -13 4029.44 595.253   1
   1   4 -12 37930.4 1476.70   1
   1   4 -11 2741.08 1184.43   1
  -1  -4  10 236.795 525.516   1
  -1  -4   9 5783.60 1387.49   1
   1   4  -8 173970. 13897.2   1
   1   4  -7 308.502 667.896   1
   1   4  -6 392.428 409.150   1
  -1  -4   5 918.196 458.683   1
   1   4  -4 13778.7 662.703   1
  -1  -4   3 593.296 335.172   1
  -1  -4   2 269.655 332.405   1
  -1  -4   1 6869.69 463.796   1
  -1  -4   0 387687. 2293.60   1
  -1  -4  -1 3446.20 371.491   1
  -1  -4  -2 1222.15 342.181   1
  -1  -4  -3 56.7827 297.873   1
  -1  -4  -4 4067.80 415.488   1
  -1  -4  -5 23043.8 753.058   1
  -1  -4  -6 2187.41 371.705   1
  -1  -4  -7 87321.5 1360.10   1
  -1  -4  -8 95744.8 1729.59   1
  -1  -4  -9 96233.8 2183.12   1
  -1  -4 -10 848.762 434.091   1
  -1  -4 -11 25581.4 1371.69   1
  -1  -4 -12 37629.7 1445.15   1
  -1  -4 -13 2994.21 644.629   1
  -1  -4 -14 4162.95 745.128   1
  -1  -4 -15 14124.8 1390.83   1
  -1  -4 -16 35104.4 1590.33   1
   1   4  17 274.835 463.357   1
   1   4  18-45.3227 314.629   1
  -1  -4 -19 8224.73 523.278   1
  -1  -4 -20 3552.48 379.279   1
  -1  -4 -21 11021.6 545.902   1
   1   4  22 1057.28 336.481   1
  -1  -4 -23 78838.0 1287.13   1
  -1  -4 -24 361.732 255.183   1
  -1  -4 -25 18474.5 700.340   1
  -1  -4 -26 932.378 208.015   1
   1   4  27 3641.27 201.844   1
  -1  -5  26 3229.76 299.876   1
  -1  -5  25 5455.84 422.043   1
  -1  -5  24 340.797 334.323   1
  -1  -5  23 1668.92 439.649   1
  -1  -5  22 20237.5 1045.49   1
  -1  -5  21 8480.44 642.912   1
  -1  -5  20 680.620 507.268   1
  -1  -5  19 379.283 467.126   1
  -1  -5  18 36212.6 1177.57   1
   1   5 -17 290.659 289.182   1
  -1  -5  16 427.305 384.991   1
   1   5 -15 4914.45 626.259   1
   1   5 -14 47093.9 1726.03   1
   1   5 -13 1921.24 641.575   1
   1   5 -12 4125.82 737.409   1
   1   5 -11 19826.4 3544.77   1
   1   5 -10 15446.5 4559.87   1
   1   5  -9 172070. 16522.5   1
  -1  -5   8 161.899 625.791   1
   1   5  -7 140094. 16938.0   1
  -1  -5   6 26635.2 1059.27   1
   1   5  -5 29233.9 1158.17   1
  -1  -5   4 2514.64 499.213   1
   1   5   5 87351.1 1509.03  -2
  -1  -5   4 87351.1 1509.03   1
   1   5  -3 16315.8 642.235   1
   1   5   4 17948.9 974.792  -2
  -1  -5   3 17948.9 974.792   1
   1   5  -2 2899.89 410.549   1
   1   5   3 3875.77 595.678  -2
  -1  -5   2 3875.77 595.678   1
  -1  -5   1 125257. 1510.83   1
   1   5   2 129174. 1873.41  -2
  -1  -5   1 129174. 1873.41   1
  -1  -5   0 209.285 269.895   1
   1   5   1 94757.1 2336.97  -2
  -1  -5   0 94757.1 2336.97   1
  -1  -5  -1 122309. 1531.68   1
   1   5   0 123245. 2355.06  -2
  -1  -5  -1 123245. 2355.06   1
  -1  -5  -2 691.812 338.519   1
   1   5  -1 109452. 2597.88  -2
  -1  -5  -2 109452. 2597.88   1
   1   5   3 438.293 319.074   1
   1   5  -2 1652.23 575.178  -2
  -1  -5  -3 1652.23 575.178   1
  -1  -5  -4 2441.39 375.703   1
   1   5  -3 13970.1 720.463  -2
  -1  -5  -4 13970.1 720.463   1
  -1  -5  -5 112013. 1395.40   1
   1   5  -4 107507. 7738.59  -2
  -1  -5  -5 107507. 7738.59   1
   1   5   6 102.678 310.069   1
   1   5  -5 22073.6 840.257  -2
  -1  -5  -6 22073.6 840.257   1
  -1  -5  -7 141423. 1852.63   1
   1   5  -6 157679. 2370.30  -2
  -1  -5  -7 157679. 2370.30   1
   1   5   8 1842.81 400.811   1
   1   5  -7 99739.4 1750.77  -2
  -1  -5  -8 99739.4 1750.77   1
   1   5   9 245037. 4567.13   1
   1   5  -8 239942. 3122.77  -2
  -1  -5  -9 239942. 3122.77   1
  -1  -5 -10 7640.71 849.507   1
   1   5  -9 139861. 2409.20  -2
  -1  -5 -10 139861. 2409.20   1
  -1  -5 -11 17572.6 1134.97   1
  -1  -5 -12 361.682 542.503   1
  -1  -5 -13 2099.98 591.980   1
   1   5  14 60451.9 2435.11   1
   1   5  15 255.794 575.960   1
   1   5  16 6566.92 590.067   1
   1   5  17 10530.7 703.284   1
  -1  -5 -18 14129.5 673.249   1
  -1  -5 -19 2150.70 394.040   1
  -1  -5 -20 544.638 318.539   1
   1   5  21 26609.4 1131.59   1
   1   5  22 8730.72 622.990   1
   1   5  23 4965.45 543.808   1
  -1  -5 -24 3473.81 293.420   1
   1   5  25 10689.8 439.232   1
   1   5  26 2193.87 231.811   1
  -1  -5 -27 177.797 120.699   1
  -1  -6  26-107.862 175.390   1
  -1  -6  25 7911.63 418.246   1
  -1  -6  24 973.151 344.980   1
  -1  -6  23 56546.9 1049.97   1
  -1  -6  22 1408.64 496.337   1
  -1  -6  21 15339.4 2260.66   1
  -1  -6  20 5023.75 561.443   1
   1   6  21 5009.38 555.483  -2
  -1  -6  20 5009.38 555.483   1
   1   6 -19 1416.31 309.903   1
   1   6  20 3147.91 510.104  -2
  -1  -6  19 3147.91 510.104   1
   1   6 -18 2011.45 251.960   1
   1   6  19 3440.99 564.029  -2
  -1  -6  18 3440.99 564.029   1
  -1  -6 -18 25475.0 865.505  -2
   1   6 -17 25475.0 865.505   1
   1   6 -16 15361.5 1084.49   1
  -1  -6 -17 17139.9 831.479  -2
   1   6 -16 17139.9 831.479   1
   1   6 -15 13470.2 1084.57   1
   1   6  16 136540. 1611.07  -2
  -1  -6  15 136540. 1611.07   1
  -1  -6 -15 2916.24 1137.25  -2
   1   6 -14 2916.24 1137.25   1
  -1  -6 -14 4710.33 977.527  -2
   1   6 -13 4710.33 977.527   1
  -1  -6 -13 29137.4 1517.30  -2
   1   6 -12 29137.4 1517.30   1
  -1  -6 -12 49360.6 1821.40  -2
   1   6 -11 49360.6 1821.40   1
  -1  -6 -11 3502.81 746.716  -2
   1   6 -10 3502.81 746.716   1
  -1  -6 -10 56170.2 5162.40  -2
   1   6  -9 56170.2 5162.40   1
  -1  -6  -9 14046.4 964.855  -2
   1   6  -8 14046.4 964.855   1
   1   6   8 85852.6 1923.77  -2
  -1  -6   7 85852.6 1923.77   1
  -1  -6  -7 1387.27 699.772  -2
   1   6  -6 1387.27 699.772   1
   1   6   6 25285.5 1046.13  -2
  -1  -6   5 25285.5 1046.13   1
   1   6   5 33999.0 1131.40  -2
  -1  -6   4 33999.0 1131.40   1
  -1  -6  -4 9266.86 691.128  -2
   1   6  -3 9266.86 691.128   1
  -1  -6  -3 415.017 459.976  -2
   1   6  -2 415.017 459.976   1
   1   6   2 22328.4 1092.22  -2
  -1  -6   1 22328.4 1092.22   1
   1   6   1 301127. 3363.79  -2
  -1  -6   0 301127. 3363.79   1
   1   6   0 226326. 2359.06  -2
  -1  -6  -1 226326. 2359.06   1
  -1  -6   1 18005.8 784.751  -2
   1   6   2 18005.8 784.751   1
   1   6  -2 562.116 473.417  -2
  -1  -6  -3 562.116 473.417   1
  -1  -6  -4 11511.1 606.856   1
  -1  -6   3 11923.1 901.660  -2
   1   6   4 11923.1 901.660   1
   1   6  -4 27644.8 1004.49  -2
  -1  -6  -5 27644.8 1004.49   1
  -1  -6  -6 5055.46 480.645   1
   1   6  -5 20029.1 930.584  -2
  -1  -6  -6 20029.1 930.584   1
   1   6   7 2907.86 300.404   1
  -1  -6   6 3248.75 851.608  -2
   1   6   7 3248.75 851.608   1
   1   6  -7 81262.1 1831.25  -2
  -1  -6  -8 81262.1 1831.25   1
  -1  -6   8 11667.9 922.160  -2
   1   6   9 11667.9 922.160   1
   1   6  -9 42580.9 2047.35  -2
  -1  -6 -10 42580.9 2047.35   1
  -1  -6  10 2978.13 867.379  -2
   1   6  11 2978.13 867.379   1
   1   6 -11 63850.8 4208.47  -2
  -1  -6 -12 63850.8 4208.47   1
   1   6  13 7009.99 1193.47   1
   1   6 -12 25892.8 1710.88  -2
  -1  -6 -13 25892.8 1710.88   1
   1   6  14 6162.92 1278.92   1
   1   6 -13 4849.50 1243.15  -2
  -1  -6 -14 4849.50 1243.15   1
   1   6  15 3197.85 1172.61   1
   1   6 -14 3355.65 875.582  -2
  -1  -6 -15 3355.65 875.582   1
  -1  -6 -16 166490. 28292.5   1
   1   6 -15 181787. 2283.17  -2
  -1  -6 -16 181787. 2283.17   1
   1   6  17 5300.86 1430.44   1
  -1  -6  16 15798.0 949.497  -2
   1   6  17 15798.0 949.497   1
  -1  -6  17 21186.4 1340.79  -2
   1   6  18 21186.4 1340.79   1
   1   6 -18 3579.11 1064.14  -2
  -1  -6 -19 3579.11 1064.14   1
  -1  -6  19 3930.47 659.278  -2
   1   6  20 3930.47 659.278   1
  -1  -6 -21 514.907 256.782   1
  -1  -6  20 4457.65 585.557  -2
   1   6  21 4457.65 585.557   1
  -1  -6 -22 3571.48 632.557   1
  -1  -6 -23 16102.5 608.113   1
  -1  -6 -24 3851.55 305.818   1
   1   6  25 7982.48 362.365   1
  -1  -6 -26 41.5510 158.556   1
  -1  -7  25 200.148 220.693   1
   1   7  25 13674.0 417.755  -2
  -1  -7  24 13674.0 417.755   1
   1   7  24 5361.07 452.638  -2
  -1  -7  23 5361.07 452.638   1
   1   7  23 19105.9 681.337  -2
  -1  -7  22 19105.9 681.337   1
   1   7  22 5869.21 541.889  -2
  -1  -7  21 5869.21 541.889   1
   1   7  21 37165.7 911.029  -2
  -1  -7  20 37165.7 911.029   1
   1   7  20 1694.02 586.343  -2
  -1  -7  19 1694.02 586.343   1
  -1  -7 -19 82884.7 1387.76  -2
   1   7 -18 82884.7 1387.76   1
   1   7  18 2983.27 602.727  -2
  -1  -7  17 2983.27 602.727   1
  -1  -7 -17 29673.1 1062.73  -2
   1   7 -16 29673.1 1062.73   1
   1   7  16 1582.22 535.411  -2
  -1  -7  15 1582.22 535.411   1
   1   7  15 153934. 2079.61  -2
  -1  -7  14 153934. 2079.61   1
  -1  -7 -14 133.849 292.551  -2
   1   7 -13 133.849 292.551   1
  -1  -7 -13 8584.75 1101.80  -2
   1   7 -12 8584.75 1101.80   1
  -1  -7 -12 5920.75 956.990  -2
   1   7 -11 5920.75 956.990   1
  -1  -7 -11 14123.2 1146.21  -2
   1   7 -10 14123.2 1146.21   1
  -1  -7 -10 17341.8 1114.14  -2
   1   7  -9 17341.8 1114.14   1
   1   7   9 62902.6 2608.99  -2
  -1  -7   8 62902.6 2608.99   1
   1   7   8 10037.1 915.391  -2
  -1  -7   7 10037.1 915.391   1
   1   7   7 84799.2 2128.47  -2
  -1  -7   6 84799.2 2128.47   1
   1   7   6 13631.5 971.089  -2
  -1  -7   5 13631.5 971.089   1
  -1  -7  -5 42855.8 1474.28  -2
   1   7  -4 42855.8 1474.28   1
   1   7   4 7941.42 920.831  -2
  -1  -7   3 7941.42 920.831   1
   1   7   3 126878. 2242.40  -2
  -1  -7   2 126878. 2242.40   1
  -1  -7  -2 76272.7 1718.14  -2
   1   7  -1 76272.7 1718.14   1
  -1  -7  -1 29427.7 1262.78  -2
   1   7   0 29427.7 1262.78   1
  -1  -7   0 42182.9 1382.40  -2
   1   7   1 42182.9 1382.40   1
   1   7  -1 91443.9 1973.39  -2
  -1  -7  -2 91443.9 1973.39   1
   1   7  -2 100748. 2079.37  -2
  -1  -7  -3 100748. 2079.37   1
   1   7  -3 8550.08 1054.82  -2
  -1  -7  -4 8550.08 1054.82   1
   1   7  -4 54416.9 1480.71  -2
  -1  -7  -5 54416.9 1480.71   1
  -1  -7   5 12146.7 757.146  -2
   1   7   6 12146.7 757.146   1
   1   7  -6 95378.4 1986.10  -2
  -1  -7  -7 95378.4 1986.10   1
  -1  -7   7 6802.73 1042.98  -2
   1   7   8 6802.73 1042.98   1
   1   7  -8 84548.8 2168.20  -2
  -1  -7  -9 84548.8 2168.20   1
  -1  -7   9 13857.1 2416.36  -2
   1   7  10 13857.1 2416.36   1
   1   7 -10 17017.3 1369.93  -2
  -1  -7 -11 17017.3 1369.93   1
   1   7 -11 3764.84 908.960  -2
  -1  -7 -12 3764.84 908.960   1
   1   7 -12 12898.6 1336.17  -2
  -1  -7 -13 12898.6 1336.17   1
   1   7 -13 295.628 472.106  -2
  -1  -7 -14 295.628 472.106   1
  -1  -7  14 132493. 2736.88  -2
   1   7  15 132493. 2736.88   1
   1   7 -15 404.723 747.323  -2
  -1  -7 -16 404.723 747.323   1
  -1  -7  16 40693.2 1421.47  -2
   1   7  17 40693.2 1421.47   1
   1   7 -17 3837.37 1089.28  -2
  -1  -7 -18 3837.37 1089.28   1
  -1  -7  18 72265.2 4247.01  -2
   1   7  19 72265.2 4247.01   1
   1   7 -19 1208.82 1078.40  -2
  -1  -7 -20 1208.82 1078.40   1
  -1  -7  20 52685.4 1277.15  -2
   1   7  21 52685.4 1277.15   1
  -1  -7  21 5124.19 627.560  -2
   1   7  22 5124.19 627.560   1
  -1  -7  22 23457.9 803.688  -2
   1   7  23 23457.9 803.688   1
  -1  -7  23 4288.88 582.097  -2
   1   7  24 4288.88 582.097   1
  -1  -7 -25 16856.2 2259.30   1
  -1  -7  24 18992.9 1232.89  -2
   1   7  25 18992.9 1232.89   1
   1   7  26 124.639 125.570   1
   1   8  25 7264.14 376.010  -2
  -1  -8  24 7264.14 376.010   1
   1   8  24 34143.6 757.663  -2
  -1  -8  23 34143.6 757.663   1
   1   8  23 1890.06 407.372  -2
  -1  -8  22 1890.06 407.372   1
   1   8  22 17420.1 1238.21  -2
  -1  -8  21 17420.1 1238.21   1
  -1  -8 -21 214.236 434.643  -2
   1   8 -20 214.236 434.643   1
  -1  -8 -20 4206.51 565.805  -2
   1   8 -19 4206.51 565.805   1
   1   8  19 2110.27 519.595  -2
  -1  -8  18 2110.27 519.595   1
  -1  -8 -18 14403.4 831.974  -2
   1   8 -17 14403.4 831.974   1
  -1  -8 -17 9230.27 794.223  -2
   1   8 -16 9230.27 794.223   1
   1   8  16 114060. 2967.27  -2
  -1  -8  15 114060. 2967.27   1
   1   8  15 4711.36 745.536  -2
  -1  -8  14 4711.36 745.536   1
   1   8  14 2781.58 719.603  -2
  -1  -8  13 2781.58 719.603   1
   1   8  13 548.968 265.590  -2
  -1  -8  12 548.968 265.590   1
  -1  -8 -12 55427.6 2436.83  -2
   1   8 -11 55427.6 2436.83   1
   1   8  11 8018.36 1085.14  -2
  -1  -8  10 8018.36 1085.14   1
  -1  -8 -10 79675.9 2699.65  -2
   1   8  -9 79675.9 2699.65   1
  -1  -8  -9 21458.3 1483.64  -2
   1   8  -8 21458.3 1483.64   1
   1   8   8 93548.5 3362.13  -2
  -1  -8   7 93548.5 3362.13   1
   1   8   7 52977.5 2186.35  -2
  -1  -8   6 52977.5 2186.35   1
  -1  -8  -6 29051.5 1513.77  -2
   1   8  -5 29051.5 1513.77   1
   1   8   5 25435.5 1505.25  -2
  -1  -8   4 25435.5 1505.25   1
  -1  -8  -4 3699.67 618.297  -2
   1   8  -3 3699.67 618.297   1
   1   8   3 850.594 491.528  -2
  -1  -8   2 850.594 491.528   1
   1   8   2 108634. 2892.87  -2
  -1  -8   1 108634. 2892.87   1
   1   8   1 122437. 3170.01  -2
  -1  -8   0 122437. 3170.01   1
   1   8   0 103354. 2891.48  -2
  -1  -8  -1 103354. 2891.48   1
  -1  -8   1 87271.3 2523.69  -2
   1   8   2 87271.3 2523.69   1
   1   8  -2 1054.97 524.223  -2
  -1  -8  -3 1054.97 524.223   1
   1   8  -3 3250.42 556.409  -2
  -1  -8  -4 3250.42 556.409   1
   1   8  -4 30111.9 1336.54  -2
  -1  -8  -5 30111.9 1336.54   1
  -1  -8   5 21108.6 1440.60  -2
   1   8   6 21108.6 1440.60   1
   1   8  -6 80467.9 3109.65  -2
  -1  -8  -7 80467.9 3109.65   1
   1   8  -7 84963.4 2703.86  -2
  -1  -8  -8 84963.4 2703.86   1
  -1  -8   8 29137.9 1695.97  -2
   1   8   9 29137.9 1695.97   1
  -1  -8   9 64168.7 2726.20  -2
   1   8  10 64168.7 2726.20   1
   1   8 -10 7728.67 1119.14  -2
  -1  -8 -11 7728.67 1119.14   1
   1   8 -11 48608.0 2273.98  -2
  -1  -8 -12 48608.0 2273.98   1
   1   8 -12 511.681 488.514  -2
  -1  -8 -13 511.681 488.514   1
   1   8 -13 3276.41 687.840  -2
  -1  -8 -14 3276.41 687.840   1
   1   8 -14 5519.93 807.783  -2
  -1  -8 -15 5519.93 807.783   1
   1   8 -15 194947. 3658.66  -2
  -1  -8 -16 194947. 3658.66   1
   1   8 -16 7638.28 1035.44  -2
  -1  -8 -17 7638.28 1035.44   1
  -1  -8  17 13168.6 909.243  -2
   1   8  18 13168.6 909.243   1
   1   8 -18 1864.62 843.291  -2
  -1  -8 -19 1864.62 843.291   1
   1   8 -19 5481.98 1012.11  -2
  -1  -8 -20 5481.98 1012.11   1
  -1  -8  20 567.181 564.225  -2
   1   8  21 567.181 564.225   1
   1   8 -21 16599.0 1792.06  -2
  -1  -8 -22 16599.0 1792.06   1
   1   8 -22 1665.17 453.495  -2
  -1  -8 -23 1665.17 453.495   1
  -1  -8  23 31678.8 1013.63  -2
   1   8  24 31678.8 1013.63   1
  -1  -8  24 6576.65 340.813  -2
   1   8  25 6576.65 340.813   1
   1   9  24 9174.30 434.959  -2
  -1  -9  23 9174.30 434.959   1
  -1  -9 -23 15263.7 4393.84  -2
   1   9 -22 15263.7 4393.84   1
   1   9  22 5826.34 1372.40  -2
  -1  -9  21 5826.34 1372.40   1
   1   9  21 12381.6 10580.7  -2
  -1  -9  20 12381.6 10580.7   1
   1   9  20 138.364 179.047  -2
  -1  -9  19 138.364 179.047   1
  -1  -9 -19 24113.2 5834.39  -2
   1   9 -18 24113.2 5834.39   1
   1   9  18 18633.6 2052.52  -2
  -1  -9  17 18633.6 2052.52   1
  -1  -9 -17 18336.6 1085.55  -2
   1   9 -16 18336.6 1085.55   1
  -1  -9 -16 15336.9 1081.02  -2
   1   9 -15 15336.9 1081.02   1
  -1  -9 -15 63876.8 1975.14  -2
   1   9 -14 63876.8 1975.14   1
   1   9  14 60975.4 5321.17  -2
  -1  -9  13 60975.4 5321.17   1
   1   9  13 2435.04 629.345  -2
  -1  -9  12 2435.04 629.345   1
  -1  -9 -12 1196.88 602.424  -2
   1   9 -11 1196.88 602.424   1
   1   9  11 9198.41 1046.92  -2
  -1  -9  10 9198.41 1046.92   1
   1   9  10 9125.57 930.847  -2
  -1  -9   9 9125.57 930.847   1
  -1  -9  -9 22073.0 1738.08  -2
   1   9  -8 22073.0 1738.08   1
   1   9   8 6717.51 1014.68  -2
  -1  -9   7 6717.51 1014.68   1
   1   9   7 16732.5 1520.19  -2
  -1  -9   6 16732.5 1520.19   1
   1   9   6 7965.62 1067.39  -2
  -1  -9   5 7965.62 1067.39   1
   1   9   5 15954.5 1459.70  -2
  -1  -9   4 15954.5 1459.70   1
   1   9   4 3310.66 695.305  -2
  -1  -9   3 3310.66 695.305   1
   1   9   3 183954. 4869.95  -2
  -1  -9   2 183954. 4869.95   1
  -1  -9  -2 121773. 3072.77  -2
   1   9  -1 121773. 3072.77   1
   1   9   1 916.244 561.628  -2
  -1  -9   0 916.244 561.628   1
   1   9   0 945.373 341.195  -2
  -1  -9  -1 945.373 341.195   1
  -1  -9   1 154991. 4511.00  -2
   1   9   2 154991. 4511.00   1
   1   9  -2 144922. 3505.53  -2
  -1  -9  -3 144922. 3505.53   1
  -1  -9   3 2513.67 686.884  -2
   1   9   4 2513.67 686.884   1
  -1  -9   4 23304.2 686.640  -2
   1   9   5 23304.2 686.640   1
   1   9  -5 10536.5 1007.83  -2
  -1  -9  -6 10536.5 1007.83   1
   1   9  -6 19901.6 1525.81  -2
  -1  -9  -7 19901.6 1525.81   1
  -1  -9   7 7365.57 1282.83  -2
   1   9   8 7365.57 1282.83   1
  -1  -9   8 28651.5 1886.98  -2
   1   9   9 28651.5 1886.98   1
   1   9  -9 7304.67 1157.43  -2
  -1  -9 -10 7304.67 1157.43   1
   1   9 -10 8573.85 951.286  -2
  -1  -9 -11 8573.85 951.286   1
  -1  -9  11 1415.06 655.124  -2
   1   9  12 1415.06 655.124   1
   1   9 -12 3228.25 955.691  -2
  -1  -9 -13 3228.25 955.691   1
   1   9 -13 50022.0 11325.7  -2
  -1  -9 -14 50022.0 11325.7   1
   1   9 -14 55998.7 2414.98  -2
  -1  -9 -15 55998.7 2414.98   1
   1   9 -15 15275.6 1499.22  -2
  -1  -9 -16 15275.6 1499.22   1
   1   9 -16 16625.0 1894.50  -2
  -1  -9 -17 16625.0 1894.50   1
   1   9 -17 23281.4 3219.00  -2
  -1  -9 -18 23281.4 3219.00   1
  -1  -9  18 22339.7 4620.40  -2
   1   9  19 22339.7 4620.40   1
  -1  -9  19 358.051 587.416  -2
   1   9  20 358.051 587.416   1
   1   9 -20 21780.3 10713.7  -2
  -1  -9 -21 21780.3 10713.7   1
  -1  -9  21 6531.09 1478.73  -2
   1   9  22 6531.09 1478.73   1
  -1  -9  22 20011.0 776.340  -2
   1   9  23 20011.0 776.340   1
  -1  -9  23 7947.09 940.392  -2
   1   9  24 7947.09 940.392   1
   1  10  23 9464.72 3336.44  -2
  -1 -10  22 9464.72 3336.44   1
  -1 -10 -22 2929.48 803.693  -2
   1  10 -21 2929.48 803.693   1
  -1 -10 -21 1480.63 420.194  -2
   1  10 -20 1480.63 420.194   1
  -1 -10 -20 625.029 452.857  -2
   1  10 -19 625.029 452.857   1
   1  10  19 2423.72 544.221  -2
  -1 -10  18 2423.72 544.221   1
   1  10  18 633.970 499.301  -2
  -1 -10  17 633.970 499.301   1
   1  10  17 57399.3 1856.81  -2
  -1 -10  16 57399.3 1856.81   1
  -1 -10 -16 23368.9 5788.83  -2
   1  10 -15 23368.9 5788.83   1
   1  10  15 18882.0 1168.35  -2
  -1 -10  14 18882.0 1168.35   1
   1  10  14 1578.42 629.744  -2
  -1 -10  13 1578.42 629.744   1
   1  10  13 16231.8 994.397  -2
  -1 -10  12 16231.8 994.397   1
   1  10  12 30382.2 1365.76  -2
  -1 -10  11 30382.2 1365.76   1
  -1 -10 -11 5807.29 700.858  -2
   1  10 -10 5807.29 700.858   1
   1  10  10 49378.8 1899.15  -2
  -1 -10   9 49378.8 1899.15   1
   1  10   9 66438.8 2152.82  -2
  -1 -10   8 66438.8 2152.82   1
  -1 -10  -8 99672.2 2592.57  -2
   1  10  -7 99672.2 2592.57   1
   1  10   7 103546. 3268.42  -2
  -1 -10   6 103546. 3268.42   1
   1  10   6 30737.9 1886.37  -2
  -1 -10   5 30737.9 1886.37   1
  -1 -10  -5 63276.8 12823.7  -2
   1  10  -4 63276.8 12823.7   1
  -1 -10  -4 8083.84 1156.64  -2
   1  10  -3 8083.84 1156.64   1
  -1 -10  -3 3079.81 765.453  -2
   1  10  -2 3079.81 765.453   1
   1  10   2 31035.2 1668.83  -2
  -1 -10   1 31035.2 1668.83   1
   1  10   1 19902.0 1499.26  -2
  -1 -10   0 19902.0 1499.26   1
   1  10   0 19271.3 1392.30  -2
  -1 -10  -1 19271.3 1392.30   1
  -1 -10   1 20107.7 2071.34  -2
   1  10   2 20107.7 2071.34   1
  -1 -10   2 2960.17 436.934  -2
   1  10   3 2960.17 436.934   1
   1  10  -3 11006.6 737.391  -2
  -1 -10  -4 11006.6 737.391   1
   1  10  -4 71618.1 2672.22  -2
  -1 -10  -5 71618.1 2672.22   1
  -1 -10   5 26414.0 1084.08  -2
   1  10   6 26414.0 1084.08   1
   1  10  -6 147754. 815.208  -2
  -1 -10  -7 147754. 815.208   1
   1  10  -7 71766.4 2337.86  -2
  -1 -10  -8 71766.4 2337.86   1
   1  10  -8 68937.7 2171.71  -2
  -1 -10  -9 68937.7 2171.71   1
   1  10  -9 53311.7 1733.30  -2
  -1 -10 -10 53311.7 1733.30   1
   1  10 -10 6212.28 806.778  -2
  -1 -10 -11 6212.28 806.778   1
   1  10 -11 22723.0 1285.54  -2
  -1 -10 -12 22723.0 1285.54   1
  -1 -10  12 13169.2 315.851  -2
   1  10  13 13169.2 315.851   1
   1  10 -13 416.713 157.036  -2
  -1 -10 -14 416.713 157.036   1
   1  10 -14 38744.6 2224.41  -2
  -1 -10 -15 38744.6 2224.41   1
   1  10 -15 50687.6 1938.95  -2
  -1 -10 -16 50687.6 1938.95   1
  -1 -10  16 58326.1 1949.56  -2
   1  10  17 58326.1 1949.56   1
   1  10 -17 176.888 251.716  -2
  -1 -10 -18 176.888 251.716   1
   1  10 -18 3720.95 621.374  -2
  -1 -10 -19 3720.95 621.374   1
   1  10 -19 1218.67 494.263  -2
  -1 -10 -20 1218.67 494.263   1
  -1 -10  20 2311.30 1772.79  -2
   1  10  21 2311.30 1772.79   1
  -1 -10  21 5890.33 2170.82  -2
   1  10  22 5890.33 2170.82   1
   1  10 -22 9346.73 3642.20  -2
  -1 -10 -23 9346.73 3642.20   1
   1  11  22 16674.5 1524.25  -2
  -1 -11  21 16674.5 1524.25   1
   1  11  21 3600.71 366.276  -2
  -1 -11  20 3600.71 366.276   1
   1  11  20 886.605 357.678  -2
  -1 -11  19 886.605 357.678   1
   1  11  19 1276.88 420.779  -2
  -1 -11  18 1276.88 420.779   1
   1  11  18 18652.6 2610.51  -2
  -1 -11  17 18652.6 2610.51   1
   1  11  17 2587.80 582.601  -2
  -1 -11  16 2587.80 582.601   1
   1  11  16 14821.9 1527.32  -2
  -1 -11  15 14821.9 1527.32   1
   1  11  15 8371.13 1853.66  -2
  -1 -11  14 8371.13 1853.66   1
   1  11  14 69078.9 5508.05  -2
  -1 -11  13 69078.9 5508.05   1
   1  11  13 528.297 618.333  -2
  -1 -11  12 528.297 618.333   1
   1  11  12 15321.2 1792.82  -2
  -1 -11  11 15321.2 1792.82   1
   1  11  11 6644.63 882.778  -2
  -1 -11  10 6644.63 882.778   1
   1  11  10 63606.7 1923.43  -2
  -1 -11   9 63606.7 1923.43   1
   1  11   9 2054.96 645.487  -2
  -1 -11   8 2054.96 645.487   1
   1  11   8 54057.9 2802.37  -2
  -1 -11   7 54057.9 2802.37   1
   1  11   7 14432.9 1080.73  -2
  -1 -11   6 14432.9 1080.73   1
   1  11   6 30680.8 1529.22  -2
  -1 -11   5 30680.8 1529.22   1
   1  11   5 2011.03 633.457  -2
  -1 -11   4 2011.03 633.457   1
   1  11   4 1988.82 571.480  -2
  -1 -11   3 1988.82 571.480   1
   1  11   3 96577.2 2398.55  -2
  -1 -11   2 96577.2 2398.55   1
   1  11   2 68860.0 1810.97  -2
  -1 -11   1 68860.0 1810.97   1
   1  11   1 2413.79 652.507  -2
  -1 -11   0 2413.79 652.507   1
   1  11   0 4363.23 780.925  -2
  -1 -11  -1 4363.23 780.925   1
   1  11  -1 86816.4 2740.05  -2
  -1 -11  -2 86816.4 2740.05   1
   1  11  -2 63891.5 1188.24  -2
  -1 -11  -3 63891.5 1188.24   1
   1  11  -3 1778.78 633.592  -2
  -1 -11  -4 1778.78 633.592   1
   1  11  -4 1971.56 677.365  -2
  -1 -11  -5 1971.56 677.365   1
   1  11  -5 32110.4 1445.50  -2
  -1 -11  -6 32110.4 1445.50   1
  -1 -11   6 11355.5 971.263  -2
   1  11   7 11355.5 971.263   1
   1  11  -7 43958.7 1439.08  -2
  -1 -11  -8 43958.7 1439.08   1
   1  11  -8 2846.58 653.169  -2
  -1 -11  -9 2846.58 653.169   1
   1  11  -9 57182.8 1613.81  -2
  -1 -11 -10 57182.8 1613.81   1
   1  11 -10 5897.60 740.411  -2
  -1 -11 -11 5897.60 740.411   1
  -1 -11  11 10588.8 866.660  -2
   1  11  12 10588.8 866.660   1
   1  11 -12 236.748 508.467  -2
  -1 -11 -13 236.748 508.467   1
   1  11 -13 132745. 3981.48  -2
  -1 -11 -14 132745. 3981.48   1
   1  11 -14 11394.8 991.068  -2
  -1 -11 -15 11394.8 991.068   1
   1  11 -15 15912.8 1068.11  -2
  -1 -11 -16 15912.8 1068.11   1
   1  11 -16 3890.19 763.320  -2
  -1 -11 -17 3890.19 763.320   1
   1  11 -17 22257.7 1058.76  -2
  -1 -11 -18 22257.7 1058.76   1
   1  11 -18 999.509 460.616  -2
  -1 -11 -19 999.509 460.616   1
  -1 -11  19 836.716 369.899  -2
   1  11  20 836.716 369.899   1
   1  11 -20 4899.74 583.154  -2
  -1 -11 -21 4899.74 583.154   1
   1  11 -21 18449.4 562.396  -2
  -1 -11 -22 18449.4 562.396   1
  -1 -12 -20 667.014 277.126  -2
   1  12 -19 667.014 277.126   1
   1  12  19 3867.84 382.103  -2
  -1 -12  18 3867.84 382.103   1
   1  12  18 77.6550 371.307  -2
  -1 -12  17 77.6550 371.307   1
   1  12  17 51728.2 1212.82  -2
  -1 -12  16 51728.2 1212.82   1
  -1 -12 -16 2050.60 498.679  -2
   1  12 -15 2050.60 498.679   1
  -1 -12 -15 12373.1 1546.70  -2
   1  12 -14 12373.1 1546.70   1
   1  12  14 874.877 556.545  -2
  -1 -12  13 874.877 556.545   1
   1  12  13 12735.3 857.034  -2
  -1 -12  12 12735.3 857.034   1
  -1 -12 -12 6526.17 754.359  -2
   1  12 -11 6526.17 754.359   1
   1  12  11 5900.16 774.920  -2
  -1 -12  10 5900.16 774.920   1
   1  12  10 8679.59 765.352  -2
  -1 -12   9 8679.59 765.352   1
   1  12   9 75897.6 2741.41  -2
  -1 -12   8 75897.6 2741.41   1
   1  12   8 9326.59 875.419  -2
  -1 -12   7 9326.59 875.419   1
   1  12   7 67840.8 1850.29  -2
  -1 -12   6 67840.8 1850.29   1
   1  12   6 3932.43 689.538  -2
  -1 -12   5 3932.43 689.538   1
  -1 -12  -5 25364.9 1149.13  -2
   1  12  -4 25364.9 1149.13   1
   1  12   4 3859.00 583.627  -2
  -1 -12   3 3859.00 583.627   1
   1  12   3 367.210 475.861  -2
  -1 -12   2 367.210 475.861   1
   1  12   2 5662.89 719.280  -2
  -1 -12   1 5662.89 719.280   1
   1  12   1 85105.8 2595.00  -2
  -1 -12   0 85105.8 2595.00   1
   1  12   0 51647.8 1485.77  -2
  -1 -12  -1 51647.8 1485.77   1
   1  12  -1 4071.53 677.943  -2
  -1 -12  -2 4071.53 677.943   1
   1  12  -2 82.5474 252.838  -2
  -1 -12  -3 82.5474 252.838   1
   1  12  -3 3397.64 667.175  -2
  -1 -12  -4 3397.64 667.175   1
   1  12  -4 22904.0 1044.08  -2
  -1 -12  -5 22904.0 1044.08   1
   1  12  -5 5408.70 721.174  -2
  -1 -12  -6 5408.70 721.174   1
   1  12  -6 84742.6 1926.76  -2
  -1 -12  -7 84742.6 1926.76   1
   1  12  -7 9343.83 844.785  -2
  -1 -12  -8 9343.83 844.785   1
   1  12  -8 80913.4 1887.10  -2
  -1 -12  -9 80913.4 1887.10   1
   1  12  -9 7101.06 757.398  -2
  -1 -12 -10 7101.06 757.398   1
   1  12 -10 6043.64 716.671  -2
  -1 -12 -11 6043.64 716.671   1
   1  12 -11 8978.91 982.946  -2
  -1 -12 -12 8978.91 982.946   1
  -1 -12  12 14849.7 1033.52  -2
   1  12  13 14849.7 1033.52   1
   1  12 -13 160.768 135.037  -2
  -1 -12 -14 160.768 135.037   1
   1  12 -14 17438.1 851.745  -2
  -1 -12 -15 17438.1 851.745   1
   1  12 -15 2931.78 646.873  -2
  -1 -12 -16 2931.78 646.873   1
   1  12 -16 45603.3 1173.74  -2
  -1 -12 -17 45603.3 1173.74   1
  -1 -12  17 317.890 431.246  -2
   1  12  18 317.890 431.246   1
   1  12 -18 4556.82 427.603  -2
  -1 -12 -19 4556.82 427.603   1
  -1 -12  19 1319.33 282.636  -2
   1  12  20 1319.33 282.636   1
  -1 -13  17 2861.42 299.673   1
  -1 -13 -18 8925.08 833.503  -2
   1  13 -17 8925.08 833.503   1
   1  13  17 770.406 423.175  -2
  -1 -13  16 770.406 423.175   1
   1  13  16 12096.1 565.287  -2
  -1 -13  15 12096.1 565.287   1
  -1 -13 -15 1251.38 433.653  -2
   1  13 -14 1251.38 433.653   1
  -1 -13 -14 44410.3 3574.10  -2
   1  13 -13 44410.3 3574.10   1
   1  13  13 1497.37 518.638  -2
  -1 -13  12 1497.37 518.638   1
  -1 -13 -12 11793.5 763.489  -2
   1  13 -11 11793.5 763.489   1
   1  13  11 8465.53 729.312  -2
  -1 -13  10 8465.53 729.312   1
  -1 -13 -10 73606.5 1782.19  -2
   1  13  -9 73606.5 1782.19   1
   1  13   9 22575.9 991.175  -2
  -1 -13   8 22575.9 991.175   1
   1  13   8 46620.5 1337.77  -2
  -1 -13   7 46620.5 1337.77   1
   1  13   7 27054.9 1089.32  -2
  -1 -13   6 27054.9 1089.32   1
   1  13   6 35641.5 1316.53  -2
  -1 -13   5 35641.5 1316.53   1
   1  13  -4 10861.2 654.354   1
   1  13   5 36782.9 1634.95  -2
  -1 -13   4 36782.9 1634.95   1
   1  13   4 300.234 548.133  -2
  -1 -13   3 300.234 548.133   1
   1  13   3 10657.1 893.059  -2
  -1 -13   2 10657.1 893.059   1
   1  13   2 22361.6 1108.65  -2
  -1 -13   1 22361.6 1108.65   1
   1  13   1 7735.53 761.983  -2
  -1 -13   0 7735.53 761.983   1
   1  13   0 10556.9 755.309  -2
  -1 -13  -1 10556.9 755.309   1
   1  13  -1 22867.5 1140.02  -2
  -1 -13  -2 22867.5 1140.02   1
   1  13  -2 11826.6 851.249  -2
  -1 -13  -3 11826.6 851.249   1
   1  13  -3 799.923 535.732  -2
  -1 -13  -4 799.923 535.732   1
   1  13  -4 47146.8 1375.89  -2
  -1 -13  -5 47146.8 1375.89   1
   1  13  -5 31999.9 1297.95  -2
  -1 -13  -6 31999.9 1297.95   1
   1  13  -6 34066.1 1269.96  -2
  -1 -13  -7 34066.1 1269.96   1
   1  13  -7 42725.1 1336.57  -2
  -1 -13  -8 42725.1 1336.57   1
   1  13  -8 30142.8 1073.83  -2
  -1 -13  -9 30142.8 1073.83   1
  -1 -13   9 60690.2 1640.14  -2
   1  13  10 60690.2 1640.14   1
   1  13 -10 13246.9 838.953  -2
  -1 -13 -11 13246.9 838.953   1
   1  13 -11 9801.53 741.496  -2
  -1 -13 -12 9801.53 741.496   1
  -1 -13  12 459.059 536.228  -2
   1  13  13 459.059 536.228   1
  -1 -13  13 59498.4 1647.03  -2
   1  13  14 59498.4 1647.03   1
   1  13 -14 1320.75 469.399  -2
  -1 -13 -15 1320.75 469.399   1
   1  13 -15 10242.4 733.529  -2
  -1 -13 -16 10242.4 733.529   1
   1  13 -16 454.372 386.809  -2
  -1 -13 -17 454.372 386.809   1
   1  13  18 8861.59 337.849   1
   1  13 -17 10496.8 422.288  -2
  -1 -13 -18 10496.8 422.288   1
  -1 -13 -19 1414.73 130.309   1
  -1 -14  15 3292.20 551.906   1
  -1 -14  14 386.813 294.788   1
  -1 -14 -15 9443.72 457.497  -2
   1  14 -14 9443.72 457.497   1
  -1 -14 -14 1300.41 427.503  -2
   1  14 -13 1300.41 427.503   1
  -1 -14 -13 5820.78 445.077  -2
   1  14 -12 5820.78 445.077   1
   1  14  12 9968.26 696.782  -2
  -1 -14  11 9968.26 696.782   1
   1  14  11 669.071 398.149  -2
  -1 -14  10 669.071 398.149   1
   1  14  10 3471.80 504.351  -2
  -1 -14   9 3471.80 504.351   1
   1  14   9 21127.9 871.955  -2
  -1 -14   8 21127.9 871.955   1
   1  14   8 16023.1 737.161  -2
  -1 -14   7 16023.1 737.161   1
   1  14   7 3020.09 555.166  -2
  -1 -14   6 3020.09 555.166   1
   1  14  -5 3848.57 449.267   1
   1  14   6 4246.75 653.636  -2
  -1 -14   5 4246.75 653.636   1
   1  14   5 7384.21 690.372  -2
  -1 -14   4 7384.21 690.372   1
   1  14   4 1863.62 529.440  -2
  -1 -14   3 1863.62 529.440   1
   1  14   3 3291.53 583.195  -2
  -1 -14   2 3291.53 583.195   1
   1  14   2 3702.79 937.781  -2
  -1 -14   1 3702.79 937.781   1
   1  14   1 133441. 1959.71  -2
  -1 -14   0 133441. 1959.71   1
   1  14   0 96396.0 1943.47  -2
  -1 -14  -1 96396.0 1943.47   1
   1  14  -1 341.885 667.768  -2
  -1 -14  -2 341.885 667.768   1
   1  14  -2 4192.31 649.458  -2
  -1 -14  -3 4192.31 649.458   1
   1  14  -3 1287.92 535.225  -2
  -1 -14  -4 1287.92 535.225   1
   1  14  -4 4823.66 666.362  -2
  -1 -14  -5 4823.66 666.362   1
  -1 -14   5 4877.39 621.924  -2
   1  14   6 4877.39 621.924   1
   1  14  -6 4518.89 612.068  -2
  -1 -14  -7 4518.89 612.068   1
   1  14  -7 20596.7 1169.56  -2
  -1 -14  -8 20596.7 1169.56   1
   1  14  -8 19703.5 1045.79  -2
  -1 -14  -9 19703.5 1045.79   1
   1  14  -9 2799.27 544.752  -2
  -1 -14 -10 2799.27 544.752   1
   1  14 -10 734.327 485.149  -2
  -1 -14 -11 734.327 485.149   1
   1  14 -11 9558.24 605.775  -2
  -1 -14 -12 9558.24 605.775   1
  -1 -14  12 6854.96 529.792  -2
   1  14  13 6854.96 529.792   1
   1  14  14 1290.68 253.722   1
   1  14 -13 838.317 399.470  -2
  -1 -14 -14 838.317 399.470   1
  -1 -14 -15 12504.5 451.461   1
   1  14 -14 12515.0 461.349  -2
  -1 -14 -15 12515.0 461.349   1
   1  14  16 41216.7 653.346   1
   1  14  17 2419.05 278.662   1
  -1 -15  13 424.721 172.511   1
  -1 -15  12 186.178 194.442   1
  -1 -15  11 3138.40 312.306   1
  -1 -15 -12 2803.77 340.184  -2
   1  15 -11 2803.77 340.184   1
   1  15  11 2672.82 342.687  -2
  -1 -15  10 2672.82 342.687   1
   1  15  10 17949.1 656.585  -2
  -1 -15   9 17949.1 656.585   1
   1  15   9 14994.4 599.083  -2
  -1 -15   8 14994.4 599.083   1
  -1 -15  -8 17846.8 643.346  -2
   1  15  -7 17846.8 643.346   1
   1  15   7 22967.5 748.440  -2
  -1 -15   6 22967.5 748.440   1
   1  15   6 7177.97 1049.73  -2
  -1 -15   5 7177.97 1049.73   1
   1  15   5 15384.4 723.949  -2
  -1 -15   4 15384.4 723.949   1
   1  15   4 3865.04 512.990  -2
  -1 -15   3 3865.04 512.990   1
   1  15   3 15665.1 773.721  -2
  -1 -15   2 15665.1 773.721   1
   1  15   2 20038.8 860.632  -2
  -1 -15   1 20038.8 860.632   1
   1  15   1 22985.6 1076.38  -2
  -1 -15   0 22985.6 1076.38   1
   1  15   0 25534.3 1091.80  -2
  -1 -15  -1 25534.3 1091.80   1
   1  15  -1 14937.4 803.768  -2
  -1 -15  -2 14937.4 803.768   1
   1  15  -2 12771.6 818.706  -2
  -1 -15  -3 12771.6 818.706   1
   1  15  -3 2784.66 773.351  -2
  -1 -15  -4 2784.66 773.351   1
  -1 -15   4 22282.4 1171.32  -2
   1  15   5 22282.4 1171.32   1
   1  15  -5 6583.82 699.947  -2
  -1 -15  -6 6583.82 699.947   1
   1  15  -6 30156.4 984.233  -2
  -1 -15  -7 30156.4 984.233   1
   1  15  -7 14351.9 954.427  -2
  -1 -15  -8 14351.9 954.427   1
  -1 -15   8 21433.7 816.059  -2
   1  15   9 21433.7 816.059   1
   1  15  -9 18544.8 796.327  -2
  -1 -15 -10 18544.8 796.327   1
  -1 -15 -11 3278.63 302.020   1
   1  15 -10 3707.63 471.636  -2
  -1 -15 -11 3707.63 471.636   1
   1  15  12 287.685 215.114   1
   1  15 -11 3312.61 485.447  -2
  -1 -15 -12 3312.61 485.447   1
   1  15  13 2261.98 253.455   1
   1  15 -12 3255.66 424.135  -2
  -1 -15 -13 3255.66 424.135   1
   1  15  14 1653.92 222.323   1
  -1 -16   9 12625.4 1180.58   1
   1  16   9 5535.38 895.471  -2
  -1 -16   8 5535.38 895.471   1
   1  16   8 26931.5 1959.50  -2
  -1 -16   7 26931.5 1959.50   1
   1  16   7 4687.77 2356.29  -2
  -1 -16   6 4687.77 2356.29   1
   1  16   6 3601.58 1009.76  -2
  -1 -16   5 3601.58 1009.76   1
   1  16   5 3060.77 446.643  -2
  -1 -16   4 3060.77 446.643   1
   1  16   4 2418.07 881.153  -2
  -1 -16   3 2418.07 881.153   1
   1  16   3 4296.08 3050.18  -2
  -1 -16   2 4296.08 3050.18   1
   1  16   2 25921.3 13419.0  -2
  -1 -16   1 25921.3 13419.0   1
   1  16   1 78133.7 1303.35  -2
  -1 -16   0 78133.7 1303.35   1
   1  16   0 59200.1 1380.12  -2
  -1 -16  -1 59200.1 1380.12   1
   1  16  -1 12522.5 2032.17  -2
  -1 -16  -2 12522.5 2032.17   1
   1  16  -2 2117.24 727.961  -2
  -1 -16  -3 2117.24 727.961   1
   1  16  -3 2199.71 430.126  -2
  -1 -16  -4 2199.71 430.126   1
   1  16  -4 4063.68 444.172  -2
  -1 -16  -5 4063.68 444.172   1
  -1 -16   5 3360.75 477.808  -2
   1  16   6 3360.75 477.808   1
  -1 -16   6 6071.23 527.321  -2
   1  16   7 6071.23 527.321   1
   1  16   8 8918.28 447.514   1
   1  16  -7 27823.5 773.714  -2
  -1 -16  -8 27823.5 773.714   1
   1  16   9 3040.84 320.908   1
   1  16  -8 5303.16 475.283  -2
  -1 -16  -9 5303.16 475.283   1
  -1 -16 -10 368.198 193.501   1
   1  16  -9 11571.5 557.780  -2
  -1 -16 -10 11571.5 557.780   1
  -1 -16 -11 156.643 149.778   1
   1  17  -3 2596.95 528.166   1
  -1 -17  -4 39132.9 2213.49  -2
   1  17  -2 39132.9 2213.49   1
  -1 -17  -3 18091.7 16249.9  -2
   1  17  -1 18091.7 16249.9   1
   1  17   2 16865.3 4905.93  -2
  -1 -17   0 16865.3 4905.93   1
  -1 -17  -1 13114.2 1178.51  -2
   1  17   1 13114.2 1178.51   1
   1  17   0 20905.7 2039.70  -2
  -1 -17  -2 20905.7 2039.70   1
   1  17  -1 13177.8 14069.3  -2
  -1 -17  -3 13177.8 14069.3   1
   1  17  -2 30064.9 684.078  -2
  -1 -17  -4 30064.9 684.078   1
  -2  17   0 1277.58 1051.87  -2
   2 -17  -1 1277.58 1051.87   1
  -2  17   1 783.283 271.536  -2
   2 -17   0 783.283 271.536   1
  -2  16  -8 17870.0 1113.23  -2
   2 -16  -9 17870.0 1113.23   1
  -2  16  -7 5675.14 543.208  -2
   2 -16  -8 5675.14 543.208   1
  -2  16  -6 14200.9 591.998  -2
   2 -16  -7 14200.9 591.998   1
  -2  16  -5 251.349 346.184  -2
   2 -16  -6 251.349 346.184   1
  -2  16  -4 15665.2 1010.18  -2
   2 -16  -5 15665.2 1010.18   1
  -2  16  -3 14544.6 628.289  -2
   2 -16  -4 14544.6 628.289   1
   2 -16   2 2878.43 533.505  -2
  -2  16   3 2878.43 533.505   1
  -2  16  -1 11793.9 2890.57  -2
   2 -16  -2 11793.9 2890.57   1
  -2  16   0 68456.9 1406.53  -2
   2 -16  -1 68456.9 1406.53   1
  -2  16   1 66607.8 1313.94  -2
   2 -16   0 66607.8 1313.94   1
  -2  16   2 14118.8 859.401  -2
   2 -16   1 14118.8 859.401   1
  -2  16   3 3671.71 518.086  -2
   2 -16   2 3671.71 518.086   1
  -2  16   4 15128.4 727.062  -2
   2 -16   3 15128.4 727.062   1
  -2  16   5 21030.7 883.604  -2
   2 -16   4 21030.7 883.604   1
  -2  16   6 128.650 200.339  -2
   2 -16   5 128.650 200.339   1
  -2  16   7 10360.4 585.463  -2
   2 -16   6 10360.4 585.463   1
  -2  16   8 5686.85 408.228  -2
   2 -16   7 5686.85 408.228   1
  -2  16   9 15168.6 558.576  -2
   2 -16   8 15168.6 558.576   1
   2 -16   9 298.946 173.151   1
  -2  15 -12 8760.21 543.907  -2
   2 -15 -13 8760.21 543.907   1
   2 -15  11 1365.16 477.632  -2
  -2  15  12 1365.16 477.632   1
  -2  15 -10 7309.50 561.955  -2
   2 -15 -11 7309.50 561.955   1
  -2  15  -9 23825.1 754.342  -2
   2 -15 -10 23825.1 754.342   1
  -2  15  -8 2161.05 441.166  -2
   2 -15  -9 2161.05 441.166   1
  -2  15  -7 5814.46 599.948  -2
   2 -15  -8 5814.46 599.948   1
  -2  15  -6 16862.7 720.403  -2
   2 -15  -7 16862.7 720.403   1
  -2  15  -5 26472.7 744.750  -2
   2 -15  -6 26472.7 744.750   1
  -2  15  -4 578.717 399.053  -2
   2 -15  -5 578.717 399.053   1
  -2  15  -3 1431.40 456.804  -2
   2 -15  -4 1431.40 456.804   1
  -2  15  -2 32768.7 1223.10  -2
   2 -15  -3 32768.7 1223.10   1
  -2  15  -1 34747.1 1817.44  -2
   2 -15  -2 34747.1 1817.44   1
  -2  15   0 3201.16 571.486  -2
   2 -15  -1 3201.16 571.486   1
  -2  15   1 3174.93 583.046  -2
   2 -15   0 3174.93 583.046   1
  -2  15   2 29604.2 1113.14  -2
   2 -15   1 29604.2 1113.14   1
  -2  15   3 44861.8 1449.90  -2
   2 -15   2 44861.8 1449.90   1
  -2  15   4 1773.86 515.533  -2
   2 -15   3 1773.86 515.533   1
  -2  15   5 521.087 288.328  -2
   2 -15   4 521.087 288.328   1
  -2  15   6 22341.2 912.642  -2
   2 -15   5 22341.2 912.642   1
  -2  15   7 19825.1 821.589  -2
   2 -15   6 19825.1 821.589   1
  -2  15   8 7524.53 594.993  -2
   2 -15   7 7524.53 594.993   1
  -2  15   9 1885.53 415.958  -2
   2 -15   8 1885.53 415.958   1
   2 -15   9 25084.8 649.583   1
  -2  15  10 28416.3 813.446  -2
   2 -15   9 28416.3 813.446   1
  -2  15  11 6653.26 447.216  -2
   2 -15  10 6653.26 447.216   1
  -2  15  12 1547.51 377.085  -2
   2 -15  11 1547.51 377.085   1
   2 -15 -13 6051.06 351.017  -2
  -2  15 -12 6051.06 351.017   1
  -2  14 -15 41522.4 757.187  -2
   2 -14 -16 41522.4 757.187   1
  -2  14 -14 7538.36 508.144  -2
   2 -14 -15 7538.36 508.144   1
   2 -14  13 1600.91 425.246  -2
  -2  14  14 1600.91 425.246   1
   2 -14  12 2317.26 454.926  -2
  -2  14  13 2317.26 454.926   1
  -2  14 -11 2899.38 458.927  -2
   2 -14 -12 2899.38 458.927   1
  -2  14 -10 4051.30 493.862  -2
   2 -14 -11 4051.30 493.862   1
  -2  14  -9 3982.86 497.502  -2
   2 -14 -10 3982.86 497.502   1
  -2  14  -8 15575.2 720.476  -2
   2 -14  -9 15575.2 720.476   1
  -2  14  -7 52151.0 1229.73  -2
   2 -14  -8 52151.0 1229.73   1
  -2  14  -6 21317.8 1022.09  -2
   2 -14  -7 21317.8 1022.09   1
  -2  14  -5 5877.48 606.935  -2
   2 -14  -6 5877.48 606.935   1
  -2  14  -4 26527.1 931.830  -2
   2 -14  -5 26527.1 931.830   1
  -2  14  -3 4103.06 566.790  -2
   2 -14  -4 4103.06 566.790   1
  -2  14  -2 755.733 447.748  -2
   2 -14  -3 755.733 447.748   1
  -2  14  -1 15016.4 1616.40  -2
   2 -14  -2 15016.4 1616.40   1
  -2  14   0 34399.7 1215.99  -2
   2 -14  -1 34399.7 1215.99   1
  -2  14   1 26721.1 1288.45  -2
   2 -14   0 26721.1 1288.45   1
  -2  14   2 20777.4 1106.55  -2
   2 -14   1 20777.4 1106.55   1
  -2  14   3 890.710 666.602  -2
   2 -14   2 890.710 666.602   1
  -2  14   4 3795.99 607.915  -2
   2 -14   3 3795.99 607.915   1
  -2  14   5 22673.3 959.497  -2
   2 -14   4 22673.3 959.497   1
  -2  14   6 9155.93 823.946  -2
   2 -14   5 9155.93 823.946   1
   2 -14  -7 17573.0 871.775  -2
  -2  14  -6 17573.0 871.775   1
  -2  14   8 58614.4 1511.80  -2
   2 -14   7 58614.4 1511.80   1
   2 -14  -9 14020.8 847.452  -2
  -2  14  -8 14020.8 847.452   1
   2 -14 -10 5921.59 640.198  -2
  -2  14  -9 5921.59 640.198   1
  -2  14  11 3847.00 513.578  -2
   2 -14  10 3847.00 513.578   1
  -2  14  12 2652.57 441.558  -2
   2 -14  11 2652.57 441.558   1
  -2  14  13 2167.22 475.218  -2
   2 -14  12 2167.22 475.218   1
  -2  14  14 2191.05 366.136  -2
   2 -14  13 2191.05 366.136   1
   2 -14 -15 6016.39 718.740  -2
  -2  14 -14 6016.39 718.740   1
   2 -14  15 22698.9 527.265   1
   2 -14 -16 41773.8 682.559  -2
  -2  14 -15 41773.8 682.559   1
   2 -13 -18 7372.86 232.720   1
   2 -13 -17 7776.76 279.494   1
   2 -13 -16 174.946 223.142   1
   2 -13 -15 23984.4 651.061   1
  -2  13 -14 55206.9 1131.78  -2
   2 -13 -15 55206.9 1131.78   1
   2 -13 -14 15602.0 417.835   1
  -2  13 -13 21193.1 1131.10  -2
   2 -13 -14 21193.1 1131.10   1
   2 -13 -13 13780.8 449.364   1
  -2  13 -12 14058.1 730.060  -2
   2 -13 -13 14058.1 730.060   1
   2 -13 -12-156.561 232.536   1
  -2  13 -11 592.288 525.405  -2
   2 -13 -12 592.288 525.405   1
  -2  13 -10 12713.5 790.152  -2
   2 -13 -11 12713.5 790.152   1
   2 -13 -10-8.77918 311.049   1
  -2  13  -9 288.436 435.713  -2
   2 -13 -10 288.436 435.713   1
   2 -13  -9 6153.55 505.050   1
  -2  13  -8 11498.4 678.535  -2
   2 -13  -9 11498.4 678.535   1
  -2  13  -7 700.530 491.925  -2
   2 -13  -8 700.530 491.925   1
  -2  13  -6 46909.7 1197.08  -2
   2 -13  -7 46909.7 1197.08   1
  -2  13  -5 18487.3 851.813  -2
   2 -13  -6 18487.3 851.813   1
  -2  13  -4 814.573 479.522  -2
   2 -13  -5 814.573 479.522   1
  -2  13  -3 9571.51 721.957  -2
   2 -13  -4 9571.51 721.957   1
  -2  13  -2 61370.4 1318.85  -2
   2 -13  -3 61370.4 1318.85   1
  -2  13  -1 44168.7 1730.77  -2
   2 -13  -2 44168.7 1730.77   1
  -2  13   0 8937.86 1005.95  -2
   2 -13  -1 8937.86 1005.95   1
  -2  13   1 8225.50 767.550  -2
   2 -13   0 8225.50 767.550   1
  -2  13   2 42084.3 1980.08  -2
   2 -13   1 42084.3 1980.08   1
  -2  13   3 69888.2 1544.03  -2
   2 -13   2 69888.2 1544.03   1
  -2  13   4 12591.8 937.232  -2
   2 -13   3 12591.8 937.232   1
  -2  13   5 211.722 441.481  -2
   2 -13   4 211.722 441.481   1
   2 -13  -6 17471.0 940.757  -2
  -2  13  -5 17471.0 940.757   1
  -2  13   7 50274.0 1527.12  -2
   2 -13   6 50274.0 1527.12   1
  -2  13   8 1834.17 580.948  -2
   2 -13   7 1834.17 580.948   1
  -2  13   9 11139.2 718.478  -2
   2 -13   8 11139.2 718.478   1
   2 -13 -10 749.452 519.751  -2
  -2  13  -9 749.452 519.751   1
   2 -13  10 12551.6 734.646   1
   2 -13 -11 14758.3 738.536  -2
  -2  13 -10 14758.3 738.536   1
  -2  13  12 517.868 446.371  -2
   2 -13  11 517.868 446.371   1
  -2  13  13 10040.6 602.575  -2
   2 -13  12 10040.6 602.575   1
   2 -13  13 7520.38 770.372   1
  -2  13  14 19296.2 2107.45  -2
   2 -13  13 19296.2 2107.45   1
  -2  13 -14 29120.8 769.012   1
  -2  13  15 49488.4 878.672  -2
   2 -13  14 49488.4 878.672   1
  -2  13 -15 974.532 252.139   1
   2 -13  16 2238.54 266.128   1
  -2  13 -17 368.053 194.369   1
   2 -12 -20 4689.30 171.451   1
   2 -12 -19 1151.61 138.805   1
   2 -12 -18 30.1456 139.243   1
   2 -12 -17 2346.40 233.009   1
   2 -12 -16 29123.9 747.193   1
   2 -12 -15 1134.81 262.673   1
   2 -12 -14 83.5771 233.473   1
   2 -12 -13 2426.87 301.925   1
   2 -12 -12 4303.71 391.704   1
   2 -12 -11 8529.81 735.853   1
  -2  12 -10 8137.11 634.120  -2
   2 -12 -11 8137.11 634.120   1
   2 -12 -10 2251.50 362.008   1
  -2  12  -9 21232.7 856.844  -2
   2 -12 -10 21232.7 856.844   1
   2 -12  -9 10209.5 625.514   1
  -2  12  -8 45513.4 1456.41  -2
   2 -12  -9 45513.4 1456.41   1
   2 -12  -8 135535. 1835.98   1
  -2  12  -7 205933. 2050.37  -2
   2 -12  -8 205933. 2050.37   1
   2 -12  -7 24684.5 901.786   1
  -2  12  -6 23391.1 802.353  -2
   2 -12  -7 23391.1 802.353   1
  -2  12  -5 6677.50 821.096  -2
   2 -12  -6 6677.50 821.096   1
  -2  12  -4 30711.3 973.553  -2
   2 -12  -5 30711.3 973.553   1
  -2  12  -3 1466.58 490.819  -2
   2 -12  -4 1466.58 490.819   1
  -2  12  -2 774.901 561.062  -2
   2 -12  -3 774.901 561.062   1
  -2  12  -1 2257.44 510.146  -2
   2 -12  -2 2257.44 510.146   1
  -2  12   0 18986.2 1074.25  -2
   2 -12  -1 18986.2 1074.25   1
  -2  12   1 24297.7 791.227  -2
   2 -12   0 24297.7 791.227   1
  -2  12   2 1817.63 593.648  -2
   2 -12   1 1817.63 593.648   1
  -2  12   3 1188.02 609.102  -2
   2 -12   2 1188.02 609.102   1
  -2  12   4 2535.93 552.005  -2
   2 -12   3 2535.93 552.005   1
  -2  12   5 26375.0 980.238  -2
   2 -12   4 26375.0 980.238   1
  -2  12   6 7508.77 952.558  -2
   2 -12   5 7508.77 952.558   1
  -2  12   7 21069.8 1096.44  -2
   2 -12   6 21069.8 1096.44   1
  -2  12   8 207490. 2347.49  -2
   2 -12   7 207490. 2347.49   1
  -2  12   9 56108.9 1546.41  -2
   2 -12   8 56108.9 1546.41   1
   2 -12   9 24281.6 1074.27   1
   2 -12 -10 25885.1 960.061  -2
  -2  12  -9 25885.1 960.061   1
  -2  12 -10 302.141 440.153   1
  -2  12  11 6148.25 593.701  -2
   2 -12  10 6148.25 593.701   1
   2 -12  11 30363.4 960.569   1
  -2  12  12 33132.9 1552.00  -2
   2 -12  11 33132.9 1552.00   1
   2 -12  12 228.588 345.289   1
  -2  12  13 2595.99 556.951  -2
   2 -12  12 2595.99 556.951   1
   2 -12  13 1010.43 378.501   1
  -2  12 -14 64.4341 334.822   1
  -2  12 -15 13676.1 622.804   1
   2 -12  16 465.766 306.106   1
   2 -12  17 881.090 262.572   1
  -2  12 -18 3008.12 255.879   1
   2 -12  19 83.4353 166.360   1
   2 -11 -21 7099.05 203.180   1
   2 -11 -20 14.2411 128.272   1
   2 -11 -19 293.125 159.339   1
   2 -11 -18 1884.59 247.623   1
   2 -11 -17 2213.07 246.625   1
   2 -11 -16 10.3903 243.437   1
   2 -11 -15 16448.1 580.619   1
   2 -11 -14 515.928 280.555   1
   2 -11 -13 6737.60 425.795   1
   2 -11 -12 1036.85 284.575   1
  -2  11 -11 7042.10 633.512  -2
   2 -11 -11 7042.10 633.512   1
   2 -11 -10 10796.4 962.322   1
  -2  11 -10 22372.0 965.625  -2
   2 -11 -10 22372.0 965.625   1
   2 -11  -9 46512.9 1078.17   1
  -2  11  -9 68487.2 1412.62  -2
   2 -11  -9 68487.2 1412.62   1
   2 -11  -8 596.538 321.497   1
  -2  11  -8 2327.32 607.263  -2
   2 -11  -8 2327.32 607.263   1
  -2  11  -7 106784. 1600.05  -2
   2 -11  -7 106784. 1600.05   1
  -2  11   6 2955.25 839.822   1
  -2  11  -6 8895.89 702.915  -2
   2 -11  -6 8895.89 702.915   1
  -2  11  -5 19367.1 889.703  -2
   2 -11  -5 19367.1 889.703   1
   2 -11  -4-828.122 422.386   1
  -2  11  -4 2179.12 583.361  -2
   2 -11  -4 2179.12 583.361   1
  -2  11  -3 6124.20 767.051  -2
   2 -11  -3 6124.20 767.051   1
   2 -11   2 49243.2 1434.90  -2
  -2  11   2 49243.2 1434.90   1
  -2  11  -1 43289.6 1399.21  -2
   2 -11  -1 43289.6 1399.21   1
  -2  11   0 1756.62 601.661  -2
   2 -11   0 1756.62 601.661   1
   2 -11  -1 51376.9 1615.79  -2
  -2  11  -1 51376.9 1615.79   1
  -2  11   2 49166.2 1448.76  -2
   2 -11   2 49166.2 1448.76   1
  -2  11   3 6414.03 964.176  -2
   2 -11   3 6414.03 964.176   1
  -2  11   4 2031.51 647.191  -2
   2 -11   4 2031.51 647.191   1
  -2  11   5 19840.5 969.289  -2
   2 -11   5 19840.5 969.289   1
  -2  11   6 9369.90 762.729  -2
   2 -11   6 9369.90 762.729   1
  -2  11   7 81389.5 1747.76  -2
   2 -11   7 81389.5 1747.76   1
  -2  11   8 4393.99 740.262  -2
   2 -11   8 4393.99 740.262   1
   2 -11   9 29499.1 1208.36   1
  -2  11   9 66651.0 1505.52  -2
   2 -11   9 66651.0 1505.52   1
   2 -11  10 12728.2 992.906   1
  -2  11  10 21754.8 894.425  -2
   2 -11  10 21754.8 894.425   1
   2 -11  11-19.9620 535.571   1
  -2  11  11 6892.13 567.398  -2
   2 -11  11 6892.13 567.398   1
   2 -11  12 31.2575 526.525   1
  -2  11  12 833.865 418.393  -2
   2 -11  12 833.865 418.393   1
   2 -11  13 15769.6 700.917   1
  -2  11  13 17990.0 773.649  -2
   2 -11  13 17990.0 773.649   1
  -2  11 -14 61333.4 1209.32   1
   2 -11  15 3289.10 434.377   1
   2 -11  16 7605.14 567.860   1
   2 -11  17 4109.19 410.525   1
  -2  11 -18 10397.7 675.071   1
   2 -11  19 758.888 239.508   1
  -2  11 -20-63.5687 173.166   1
   2 -11  21 575.462 153.915   1
   2 -10 -22 344.379 128.434   1
   2 -10 -21 3690.49 209.654   1
   2 -10 -20 3746.24 241.743   1
   2 -10 -19 46.8279 185.140   1
   2 -10 -18 71.1923 210.935   1
   2 -10 -17 20199.9 545.392   1
   2 -10 -16 51819.0 962.893   1
   2 -10 -15 18506.5 631.452   1
  -2  10 -15 26423.0 955.446  -2
   2 -10 -15 26423.0 955.446   1
   2 -10 -14 28.7241 306.448   1
  -2  10 -14 1456.33 588.628  -2
   2 -10 -14 1456.33 588.628   1
  -2  10 -13 12327.8 764.002  -2
   2 -10 -13 12327.8 764.002   1
  -2  10 -12 40188.9 1003.18  -2
   2 -10 -12 40188.9 1003.18   1
  -2  10 -11 20414.3 1017.10  -2
   2 -10 -11 20414.3 1017.10   1
  -2  10  10-2873.61 1203.87   1
  -2  10 -10 1158.67 529.752  -2
   2 -10 -10 1158.67 529.752   1
  -2  10  -9 13859.9 885.655  -2
   2 -10  -9 13859.9 885.655   1
  -2  10  -8 139019. 1907.22  -2
   2 -10  -8 139019. 1907.22   1
  -2  10  -7 26618.2 995.183  -2
   2 -10  -7 26618.2 995.183   1
  -2  10  -6 3292.74 603.585  -2
   2 -10  -6 3292.74 603.585   1
  -2  10  -5 5148.40 585.301  -2
   2 -10  -5 5148.40 585.301   1
  -2  10  -4 1080.41 664.143  -2
   2 -10  -4 1080.41 664.143   1
  -2  10  -3 1067.48 634.094  -2
   2 -10  -3 1067.48 634.094   1
  -2  10  -2 4768.01 798.482  -2
   2 -10  -2 4768.01 798.482   1
  -2  10  -1 9719.39 1020.80  -2
   2 -10  -1 9719.39 1020.80   1
  -2  10   0 232682. 11058.0  -2
   2 -10   0 232682. 11058.0   1
  -2  10   1 7257.30 903.690  -2
   2 -10   1 7257.30 903.690   1
  -2  10   2 4868.02 1057.62  -2
   2 -10   2 4868.02 1057.62   1
  -2  10   3 1081.76 622.484  -2
   2 -10   3 1081.76 622.484   1
  -2  10   4 1278.85 699.815  -2
   2 -10   4 1278.85 699.815   1
  -2  10   5 6527.46 721.654  -2
   2 -10   5 6527.46 721.654   1
  -2  10   6 4311.34 671.792  -2
   2 -10   6 4311.34 671.792   1
  -2  10   7 36633.6 1617.08  -2
   2 -10   7 36633.6 1617.08   1
  -2  10   8 144313. 2343.59  -2
   2 -10   8 144313. 2343.59   1
  -2  10   9 19448.9 1041.97  -2
   2 -10   9 19448.9 1041.97   1
  -2  10  10 1423.77 509.053  -2
   2 -10  10 1423.77 509.053   1
  -2  10  11 22201.8 918.856  -2
   2 -10  11 22201.8 918.856   1
  -2  10  12 31125.2 1063.87  -2
   2 -10  12 31125.2 1063.87   1
   2 -10  13 1739.01 533.529   1
  -2  10  13 8529.02 681.546  -2
   2 -10  13 8529.02 681.546   1
   2 -10  14 2176.44 530.681   1
  -2  10  14 1303.24 807.158  -2
   2 -10  14 1303.24 807.158   1
   2 -10  15 11046.6 795.316   1
  -2  10  15 24651.7 835.876  -2
   2 -10  15 24651.7 835.876   1
   2 -10  16 19721.0 749.288   1
   2 -10  17 421.308 315.203   1
   2 -10  18 131.904 279.230   1
   2 -10  19-9.35901 248.601   1
  -2  10 -20 1064.62 251.250   1
  -2  10 -21 859.882 226.560   1
   2 -10  22 2431.98 185.639   1
   2  -9 -23 715.508 188.298   1
   2  -9 -22 50986.2 632.707   1
   2  -9 -21 4769.99 265.867   1
   2  -9 -20-103.754 189.727   1
  -2   9 -20 471.593 521.387  -2
   2  -9 -20 471.593 521.387   1
  -2   9  19 888.393 243.398   1
  -2   9 -19 1409.45 567.845  -2
   2  -9 -19 1409.45 567.845   1
   2  -9 -18 10606.5 443.643   1
  -2   9 -18 23473.8 1354.09  -2
   2  -9 -18 23473.8 1354.09   1
  -2   9 -17 23373.9 893.023  -2
   2  -9 -17 23373.9 893.023   1
  -2   9 -16 6923.32 721.163  -2
   2  -9 -16 6923.32 721.163   1
  -2   9 -15 11413.4 810.845  -2
   2  -9 -15 11413.4 810.845   1
  -2   9 -14 57061.5 1808.07  -2
   2  -9 -14 57061.5 1808.07   1
  -2   9 -13 3938.67 604.033  -2
   2  -9 -13 3938.67 604.033   1
   2  -9 -12 1350.56 878.941   1
  -2   9 -12 2188.45 677.450  -2
   2  -9 -12 2188.45 677.450   1
  -2   9 -11 6214.65 728.125  -2
   2  -9 -11 6214.65 728.125   1
  -2   9 -10 45173.4 1242.01  -2
   2  -9 -10 45173.4 1242.01   1
  -2   9  -9 116695. 2232.58  -2
   2  -9  -9 116695. 2232.58   1
  -2   9  -8 727.897 525.399  -2
   2  -9  -8 727.897 525.399   1
  -2   9  -7 124423. 3096.65  -2
   2  -9  -7 124423. 3096.65   1
   2  -9   6 93296.9 2564.01  -2
  -2   9   6 93296.9 2564.01   1
  -2   9  -5 33392.6 1712.10  -2
   2  -9  -5 33392.6 1712.10   1
  -2   9  -4 1822.92 639.432  -2
   2  -9  -4 1822.92 639.432   1
  -2   9  -3 271.275 424.611  -2
   2  -9  -3 271.275 424.611   1
  -2   9  -2 2332.10 701.672  -2
   2  -9  -2 2332.10 701.672   1
  -2   9  -1 52316.2 1985.67  -2
   2  -9  -1 52316.2 1985.67   1
  -2   9   0 55.6739 534.905  -2
   2  -9   0 55.6739 534.905   1
  -2   9   1 73710.1 2333.83  -2
   2  -9   1 73710.1 2333.83   1
   2  -9  -2 2427.62 690.773  -2
  -2   9  -2 2427.62 690.773   1
  -2   9   3 1663.49 617.453  -2
   2  -9   3 1663.49 617.453   1
  -2   9   4 2594.03 692.177  -2
   2  -9   4 2594.03 692.177   1
  -2   9   5 36774.2 1777.14  -2
   2  -9   5 36774.2 1777.14   1
  -2   9   6 75980.0 3845.88  -2
   2  -9   6 75980.0 3845.88   1
  -2   9   7 106485. 3769.36  -2
   2  -9   7 106485. 3769.36   1
  -2   9   8 486.317 306.813  -2
   2  -9   8 486.317 306.813   1
  -2   9   9 127133. 2749.90  -2
   2  -9   9 127133. 2749.90   1
  -2   9  10 38309.5 1465.32  -2
   2  -9  10 38309.5 1465.32   1
   2  -9 -11 5985.00 678.725  -2
  -2   9 -11 5985.00 678.725   1
  -2   9  12 2717.93 550.008  -2
   2  -9  12 2717.93 550.008   1
  -2   9  13 4656.47 634.108  -2
   2  -9  13 4656.47 634.108   1
  -2   9  14 62369.6 1383.06  -2
   2  -9  14 62369.6 1383.06   1
  -2   9  15 13797.6 891.347  -2
   2  -9  15 13797.6 891.347   1
  -2   9  16 7851.26 684.211  -2
   2  -9  16 7851.26 684.211   1
  -2   9  17 27241.7 960.647  -2
   2  -9  17 27241.7 960.647   1
  -2   9  18 22377.5 800.060  -2
   2  -9  18 22377.5 800.060   1
   2  -9  19 186.432 253.503   1
  -2   9  19 1054.48 398.399  -2
   2  -9  19 1054.48 398.399   1
  -2   9 -20 632.534 287.716   1
  -2   9  20 1399.23 342.423  -2
   2  -9  20 1399.23 342.423   1
  -2   9 -21 14922.5 487.329   1
  -2   9 -22 2238.37 318.105   1
   2  -9  23 1749.06 264.170   1
   2  -8  24 15270.8 479.187  -2
  -2   8  24 15270.8 479.187   1
  -2   8 -23 36748.0 767.323  -2
   2  -8 -23 36748.0 767.323   1
  -2   8 -22 3656.69 514.858  -2
   2  -8 -22 3656.69 514.858   1
   2  -8 -21 14232.0 374.830   1
  -2   8 -21 17091.2 2220.56  -2
   2  -8 -21 17091.2 2220.56   1
  -2   8 -20 5378.23 565.852  -2
   2  -8 -20 5378.23 565.852   1
  -2   8 -19 238.444 472.234  -2
   2  -8 -19 238.444 472.234   1
  -2   8 -18 8022.08 686.670  -2
   2  -8 -18 8022.08 686.670   1
  -2   8 -17 54956.1 1313.09  -2
   2  -8 -17 54956.1 1313.09   1
  -2   8 -16 161551. 2617.47  -2
   2  -8 -16 161551. 2617.47   1
  -2   8 -15 34079.0 1184.30  -2
   2  -8 -15 34079.0 1184.30   1
  -2   8 -14 9747.47 843.670  -2
   2  -8 -14 9747.47 843.670   1
  -2   8 -13 11760.7 937.385  -2
   2  -8 -13 11760.7 937.385   1
   2  -8  12 33358.8 1337.75  -2
  -2   8  12 33358.8 1337.75   1
  -2   8 -11 3537.55 937.829  -2
   2  -8 -11 3537.55 937.829   1
  -2   8 -10 1816.75 890.822  -2
   2  -8 -10 1816.75 890.822   1
   2  -8   9 24947.2 1502.96  -2
  -2   8   9 24947.2 1502.96   1
   2  -8   8 26961.7 1679.44  -2
  -2   8   8 26961.7 1679.44   1
  -2   8  -7 17836.9 1292.71  -2
   2  -8  -7 17836.9 1292.71   1
  -2   8  -6 979.646 603.078  -2
   2  -8  -6 979.646 603.078   1
  -2   8  -5 18825.0 1421.95  -2
   2  -8  -5 18825.0 1421.95   1
  -2   8  -4 49505.7 1885.23  -2
   2  -8  -4 49505.7 1885.23   1
  -2   8  -3 1752.10 550.296  -2
   2  -8  -3 1752.10 550.296   1
  -2   8  -2 11450.3 1149.88  -2
   2  -8  -2 11450.3 1149.88   1
  -2   8  -1 131186. 2911.32  -2
   2  -8  -1 131186. 2911.32   1
   2  -8   0 601629. 6346.37  -2
  -2   8   0 601629. 6346.37   1
  -2   8   1 115426. 3864.42  -2
   2  -8   1 115426. 3864.42   1
  -2   8   2 13684.0 1043.86  -2
   2  -8   2 13684.0 1043.86   1
  -2   8   3 756.829 234.924  -2
   2  -8   3 756.829 234.924   1
  -2   8   4 47450.1 2377.12  -2
   2  -8   4 47450.1 2377.12   1
  -2   8   5 14146.9 1293.58  -2
   2  -8   5 14146.9 1293.58   1
   2  -8  -6 2223.75 1313.77  -2
  -2   8  -6 2223.75 1313.77   1
  -2   8   7 14283.4 1409.10  -2
   2  -8   7 14283.4 1409.10   1
  -2   8   8 37454.4 2658.54  -2
   2  -8   8 37454.4 2658.54   1
  -2   8   9 18018.8 1681.73  -2
   2  -8   9 18018.8 1681.73   1
  -2   8  10 3702.68 2189.15  -2
   2  -8  10 3702.68 2189.15   1
   2  -8 -11 3457.48 624.038  -2
  -2   8 -11 3457.48 624.038   1
  -2   8  12 29923.9 1145.07  -2
   2  -8  12 29923.9 1145.07   1
  -2   8  13 9430.95 788.452  -2
   2  -8  13 9430.95 788.452   1
  -2   8  14 10166.6 772.517  -2
   2  -8  14 10166.6 772.517   1
  -2   8  15 24389.5 989.559  -2
   2  -8  15 24389.5 989.559   1
  -2   8  16 175904. 2895.78  -2
   2  -8  16 175904. 2895.78   1
  -2   8  17 42004.5 1326.72  -2
   2  -8  17 42004.5 1326.72   1
  -2   8  18 8244.89 641.805  -2
   2  -8  18 8244.89 641.805   1
  -2   8  19 346.316 440.853  -2
   2  -8  19 346.316 440.853   1
  -2   8  20 4005.08 563.720  -2
   2  -8  20 4005.08 563.720   1
   2  -8 -21 11415.6 506.445  -2
  -2   8 -21 11415.6 506.445   1
   2  -8 -22 3275.29 399.148  -2
  -2   8 -22 3275.29 399.148   1
  -2   8  23 27426.4 555.524  -2
   2  -8  23 27426.4 555.524   1
  -2   8  24 12854.5 378.099  -2
   2  -8  24 12854.5 378.099   1
  -2   7 -25 15252.3 538.598  -2
   2  -7 -25 15252.3 538.598   1
  -2   7 -24 578.958 372.554  -2
   2  -7 -24 578.958 372.554   1
   2  -7  23 5813.17 595.514  -2
  -2   7  23 5813.17 595.514   1
  -2   7 -22 21823.8 3944.42  -2
   2  -7 -22 21823.8 3944.42   1
  -2   7 -21 26456.0 1002.31  -2
   2  -7 -21 26456.0 1002.31   1
  -2   7 -20 385.967 462.886  -2
   2  -7 -20 385.967 462.886   1
  -2   7 -19 10307.3 777.584  -2
   2  -7 -19 10307.3 777.584   1
  -2   7 -18 48226.1 1485.78  -2
   2  -7 -18 48226.1 1485.78   1
  -2   7 -17 32895.5 1521.57  -2
   2  -7 -17 32895.5 1521.57   1
  -2   7 -16 924.607 654.986  -2
   2  -7 -16 924.607 654.986   1
   2  -7  15 18704.3 1212.39  -2
  -2   7  15 18704.3 1212.39   1
  -2   7 -14 109633. 4053.17  -2
   2  -7 -14 109633. 4053.17   1
  -2   7 -13 22383.6 1211.27  -2
   2  -7 -13 22383.6 1211.27   1
   2  -7  12 1186.28 922.920  -2
  -2   7  12 1186.28 922.920   1
   2  -7  11 15058.9 2108.18  -2
  -2   7  11 15058.9 2108.18   1
  -2   7 -10 43311.4 2109.90  -2
   2  -7 -10 43311.4 2109.90   1
   2  -7   9 101378. 8655.71  -2
  -2   7   9 101378. 8655.71   1
   2  -7   8 4195.59 874.874  -2
  -2   7   8 4195.59 874.874   1
  -2   7  -7 95966.5 5166.28  -2
   2  -7  -7 95966.5 5166.28   1
  -2   7  -6 132388. 3229.58  -2
   2  -7  -6 132388. 3229.58   1
  -2   7  -5 104864. 2783.81  -2
   2  -7  -5 104864. 2783.81   1
  -2   7  -4 3943.69 686.835  -2
   2  -7  -4 3943.69 686.835   1
   2  -7   3 30194.0 1608.93  -2
  -2   7   3 30194.0 1608.93   1
   2  -7   2 179591. 3006.55  -2
  -2   7   2 179591. 3006.55   1
   2  -7   1 33144.3 1525.07  -2
  -2   7   1 33144.3 1525.07   1
   2  -7   0 11350.5 852.655  -2
  -2   7   0 11350.5 852.655   1
  -2   7   1 40203.4 1591.42  -2
   2  -7   1 40203.4 1591.42   1
  -2   7   2 169953. 12591.0  -2
   2  -7   2 169953. 12591.0   1
  -2   7   3 31390.4 1785.98  -2
   2  -7   3 31390.4 1785.98   1
  -2   7   4 4359.68 688.078  -2
   2  -7   4 4359.68 688.078   1
  -2   7   5 122318. 3283.07  -2
   2  -7   5 122318. 3283.07   1
   2  -7  -6 122502. 6567.96  -2
  -2   7  -6 122502. 6567.96   1
  -2   7   7 122386. 3018.68  -2
   2  -7   7 122386. 3018.68   1
   2  -7  -8 5956.02 862.087  -2
  -2   7  -8 5956.02 862.087   1
  -2   7   9 139942. 5343.05  -2
   2  -7   9 139942. 5343.05   1
   2  -7 -10 41805.9 2059.53  -2
  -2   7 -10 41805.9 2059.53   1
  -2   7  11 16927.5 1380.25  -2
   2  -7  11 16927.5 1380.25   1
   2  -7 -12 577.137 763.715  -2
  -2   7 -12 577.137 763.715   1
   2  -7 -13 16082.0 1105.78  -2
  -2   7 -13 16082.0 1105.78   1
  -2   7  14 72729.0 1903.60  -2
   2  -7  14 72729.0 1903.60   1
  -2   7  15 16080.2 979.480  -2
   2  -7  15 16080.2 979.480   1
  -2   7  16 978.326 526.476  -2
   2  -7  16 978.326 526.476   1
  -2   7  17 41055.9 1556.14  -2
   2  -7  17 41055.9 1556.14   1
  -2   7  18 31943.4 1320.89  -2
   2  -7  18 31943.4 1320.89   1
   2  -7 -19 7037.51 663.287  -2
  -2   7 -19 7037.51 663.287   1
  -2   7  20 180.569 250.647  -2
   2  -7  20 180.569 250.647   1
  -2   7  21 29682.2 939.857  -2
   2  -7  21 29682.2 939.857   1
  -2   7  22 16606.9 642.595  -2
   2  -7  22 16606.9 642.595   1
  -2   7  23 6237.42 578.455  -2
   2  -7  23 6237.42 578.455   1
  -2   7  24 635.959 280.101  -2
   2  -7  24 635.959 280.101   1
  -2   7  25 16342.9 420.523  -2
   2  -7  25 16342.9 420.523   1
   2  -6  26 159.024 222.982  -2
  -2   6  26 159.024 222.982   1
  -2   6 -25 7030.78 3162.29  -2
   2  -6 -25 7030.78 3162.29   1
  -2   6 -24 44253.4 21348.9  -2
   2  -6 -24 44253.4 21348.9   1
  -2   6 -23 22969.5 1209.11  -2
   2  -6 -23 22969.5 1209.11   1
  -2   6 -22 4613.69 625.346  -2
   2  -6 -22 4613.69 625.346   1
  -2   6 -21 37687.0 3461.45  -2
   2  -6 -21 37687.0 3461.45   1
  -2   6 -20 5679.75 695.084  -2
   2  -6 -20 5679.75 695.084   1
  -2   6 -19 2058.06 592.498  -2
   2  -6 -19 2058.06 592.498   1
  -2   6 -18 8711.46 819.775  -2
   2  -6 -18 8711.46 819.775   1
  -2   6 -17 19119.8 1263.03  -2
   2  -6 -17 19119.8 1263.03   1
  -2   6 -16 203287. 3041.23  -2
   2  -6 -16 203287. 3041.23   1
  -2   6 -15 83017.4 2274.82  -2
   2  -6 -15 83017.4 2274.82   1
  -2   6 -14 6812.95 694.740  -2
   2  -6 -14 6812.95 694.740   1
   2  -6  13 1454.69 1109.68  -2
  -2   6  13 1454.69 1109.68   1
  -2   6 -12 18113.2 1857.23  -2
   2  -6 -12 18113.2 1857.23   1
   2  -6  11 10439.2 1392.20  -2
  -2   6  11 10439.2 1392.20   1
  -2   6 -10 3046.91 899.024  -2
   2  -6 -10 3046.91 899.024   1
  -2   6  -9 118911. 3217.32  -2
   2  -6  -9 118911. 3217.32   1
  -2   6  -8 16539.2 528.813  -2
   2  -6  -8 16539.2 528.813   1
   2  -6   7 100832. 3228.09  -2
  -2   6   7 100832. 3228.09   1
  -2   6  -6 2026.99 609.289  -2
   2  -6  -6 2026.99 609.289   1
  -2   6  -5 31178.1 1570.98  -2
   2  -6  -5 31178.1 1570.98   1
  -2   6  -4 1623.45 210.060  -2
   2  -6  -4 1623.45 210.060   1
   2  -6   3 8843.36 269.640  -2
  -2   6   3 8843.36 269.640   1
  -2   6  -2 1884.99 506.052  -2
   2  -6  -2 1884.99 506.052   1
   2  -6   1 86022.3 2393.81  -2
  -2   6   1 86022.3 2393.81   1
  -2   6   0 381506. 4712.17  -2
   2  -6   0 381506. 4712.17   1
   2  -6  -1 72437.6 1748.90  -2
  -2   6  -1 72437.6 1748.90   1
   2  -6  -2 2818.79 475.733  -2
  -2   6  -2 2818.79 475.733   1
   2  -6  -3 9771.55 1682.54  -2
  -2   6  -3 9771.55 1682.54   1
  -2   6   4 2519.66 574.197  -2
   2  -6   4 2519.66 574.197   1
   2  -6  -5 27703.6 1410.55  -2
  -2   6  -5 27703.6 1410.55   1
  -2   6   6 1179.98 182.343  -2
   2  -6   6 1179.98 182.343   1
  -2   6   7 101221. 2630.98  -2
   2  -6   7 101221. 2630.98   1
  -2   6   8 14305.7 1347.05  -2
   2  -6   8 14305.7 1347.05   1
  -2   6   9 98313.8 11659.2  -2
   2  -6   9 98313.8 11659.2   1
   2  -6 -10 4188.68 1215.24  -2
  -2   6 -10 4188.68 1215.24   1
   2  -6 -11 8469.85 1585.60  -2
  -2   6 -11 8469.85 1585.60   1
  -2   6  12 20672.7 1745.26  -2
   2  -6  12 20672.7 1745.26   1
  -2   6  13 3524.30 861.512  -2
   2  -6  13 3524.30 861.512   1
  -2   6  14 10762.7 855.822  -2
   2  -6  14 10762.7 855.822   1
  -2   6  15 52013.8 1792.51  -2
   2  -6  15 52013.8 1792.51   1
   2  -6 -16 139199. 3208.73  -2
  -2   6 -16 139199. 3208.73   1
  -2   6  17 16389.5 2077.93  -2
   2  -6  17 16389.5 2077.93   1
  -2   6  18 9775.45 747.910  -2
   2  -6  18 9775.45 747.910   1
  -2   6  19 2107.44 566.375  -2
   2  -6  19 2107.44 566.375   1
  -2   6  20 3060.83 564.758  -2
   2  -6  20 3060.83 564.758   1
  -2   6  21 21476.3 2055.36  -2
   2  -6  21 21476.3 2055.36   1
  -2   6  22 4360.54 490.245  -2
   2  -6  22 4360.54 490.245   1
  -2   6  23 18130.4 3104.18  -2
   2  -6  23 18130.4 3104.18   1
  -2   6  24 31792.7 6365.24  -2
   2  -6  24 31792.7 6365.24   1
  -2   6  25 4701.76 1881.47  -2
   2  -6  25 4701.76 1881.47   1
  -2   6  26-0.28015 176.442  -2
   2  -6  26-0.28015 176.442   1
   2  -5  26 4053.64 1437.69  -2
  -2   5  26 4053.64 1437.69   1
  -2   5 -25 49985.6 31087.5  -2
   2  -5 -25 49985.6 31087.5   1
  -2   5 -24 364.802 441.009  -2
   2  -5 -24 364.802 441.009   1
   2  -5  23 33715.3 1083.66  -2
  -2   5  23 33715.3 1083.66   1
  -2   5 -22 7020.84 849.115  -2
   2  -5 -22 7020.84 849.115   1
  -2   5 -21 43082.6 2079.65  -2
   2  -5 -21 43082.6 2079.65   1
  -2   5 -20 1125.40 252.460  -2
   2  -5 -20 1125.40 252.460   1
  -2   5 -19 3980.74 2741.13  -2
   2  -5 -19 3980.74 2741.13   1
  -2   5 -18 58665.5 74975.0  -2
   2  -5 -18 58665.5 74975.0   1
  -2   5 -17 9140.44 1887.59  -2
   2  -5 -17 9140.44 1887.59   1
  -2   5 -16 6495.99 963.574  -2
   2  -5 -16 6495.99 963.574   1
   2  -5  15 14139.9 20473.7  -2
  -2   5  15 14139.9 20473.7   1
   2  -5  14 134825. 28321.3  -2
  -2   5  14 134825. 28321.3   1
   2  -5  13 18685.7 20255.8  -2
  -2   5  13 18685.7 20255.8   1
   2  -5  12 86.7633 1719.45  -2
  -2   5  12 86.7633 1719.45   1
   2  -5  11 12432.9 12052.9  -2
  -2   5  11 12432.9 12052.9   1
  -2   5 -10 80138.8 18172.7  -2
   2  -5 -10 80138.8 18172.7   1
   2  -5   9 51363.3 2428.45  -2
  -2   5   9 51363.3 2428.45   1
   2  -5   8 13728.2 1869.81  -2
  -2   5   8 13728.2 1869.81   1
  -2   5  -7 18758.8 3258.73  -2
   2  -5  -7 18758.8 3258.73   1
   2  -5   6 82501.1 2954.01  -2
  -2   5   6 82501.1 2954.01   1
  -2   5  -5 18109.0 1777.78  -2
   2  -5  -5 18109.0 1777.78   1
  -2   5  -4 842.252 544.065  -2
   2  -5  -4 842.252 544.065   1
  -2   5  -3 78317.4 1888.57  -2
   2  -5  -3 78317.4 1888.57   1
   2  -5   2 588579. 15279.3  -2
  -2   5   2 588579. 15279.3   1
  -2   5  -1 35885.2 1244.47  -2
   2  -5  -1 35885.2 1244.47   1
  -2   5   0 14466.6 435.940  -2
   2  -5   0 14466.6 435.940   1
  -2   5   1 46857.4 1465.75  -2
   2  -5   1 46857.4 1465.75   1
  -2   5   2 621627. 15433.7  -2
   2  -5   2 621627. 15433.7   1
   2  -5  -3 76150.1 1850.79  -2
  -2   5  -3 76150.1 1850.79   1
   2  -5  -4 994.185 339.797  -2
  -2   5  -4 994.185 339.797   1
   2  -5  -5 38389.7 1985.80  -2
  -2   5  -5 38389.7 1985.80   1
  -2   5   6 64655.5 10473.5  -2
   2  -5   6 64655.5 10473.5   1
   2  -5  -7 15813.4 4317.37  -2
  -2   5  -7 15813.4 4317.37   1
  -2   5   8 15386.8 2771.57  -2
   2  -5   8 15386.8 2771.57   1
   2  -5  -9 61722.7 2742.15  -2
  -2   5  -9 61722.7 2742.15   1
   2  -5 -10 84120.0 2733.74  -2
  -2   5 -10 84120.0 2733.74   1
  -2   5  11 8255.34 1024.77  -2
   2  -5  11 8255.34 1024.77   1
   2  -5 -12 2092.51 899.121  -2
  -2   5 -12 2092.51 899.121   1
   2  -5 -13 30407.9 1891.40  -2
  -2   5 -13 30407.9 1891.40   1
   2  -5 -14 147959. 35524.0  -2
  -2   5 -14 147959. 35524.0   1
  -2   5  15 33656.0 2724.33  -2
   2  -5  15 33656.0 2724.33   1
  -2   5  16 9807.76 906.383  -2
   2  -5  16 9807.76 906.383   1
   2  -5 -17 14301.2 3473.11  -2
  -2   5 -17 14301.2 3473.11   1
  -2   5  18 14444.6 8556.33  -2
   2  -5  18 14444.6 8556.33   1
  -2   5  19 843.953 629.392  -2
   2  -5  19 843.953 629.392   1
  -2   5  20 435.437 459.432  -2
   2  -5  20 435.437 459.432   1
  -2   5  21 42587.6 4494.53  -2
   2  -5  21 42587.6 4494.53   1
  -2   5  22 3859.93 817.426  -2
   2  -5  22 3859.93 817.426   1
  -2   5  23 11967.6 5074.96  -2
   2  -5  23 11967.6 5074.96   1
  -2   5  24 142.896 350.097  -2
   2  -5  24 142.896 350.097   1
  -2   5  25 32133.8 2364.26  -2
   2  -5  25 32133.8 2364.26   1
  -2   5  26 2765.36 614.965  -2
   2  -5  26 2765.36 614.965   1
  -2   4 -27 3142.25 375.384  -2
   2  -4 -27 3142.25 375.384   1
  -2   4 -26 666.379 310.502  -2
   2  -4 -26 666.379 310.502   1
  -2   4 -25 3397.21 437.880  -2
   2  -4 -25 3397.21 437.880   1
   2  -4  24 51939.7 1241.88  -2
  -2   4  24 51939.7 1241.88   1
  -2   4 -23 26319.6 997.470  -2
   2  -4 -23 26319.6 997.470   1
  -2   4 -22 1427.89 544.839  -2
   2  -4 -22 1427.89 544.839   1
  -2   4 -21 7548.83 857.433  -2
   2  -4 -21 7548.83 857.433   1
  -2   4 -20 2245.35 658.430  -2
   2  -4 -20 2245.35 658.430   1
  -2   4 -19 4893.86 815.164  -2
   2  -4 -19 4893.86 815.164   1
  -2   4 -18 855.365 748.766  -2
   2  -4 -18 855.365 748.766   1
   2  -4  17 1767.62 611.529  -2
  -2   4  17 1767.62 611.529   1
  -2   4 -16 98964.4 2943.10  -2
   2  -4 -16 98964.4 2943.10   1
  -2   4 -15 32137.3 2529.49  -2
   2  -4 -15 32137.3 2529.49   1
  -2   4 -14 2626.94 1466.99  -2
   2  -4 -14 2626.94 1466.99   1
   2  -4  13 2893.10 1089.83  -2
  -2   4  13 2893.10 1089.83   1
   2  -4  12 22198.0 1941.54  -2
  -2   4  12 22198.0 1941.54   1
  -2   4 -11 14080.7 2582.36  -2
   2  -4 -11 14080.7 2582.36   1
   2  -4  10 4719.21 1532.56  -2
  -2   4  10 4719.21 1532.56   1
   2  -4   9 132902. 4405.62  -2
  -2   4   9 132902. 4405.62   1
  -2   4  -8 200492. 3415.22  -2
   2  -4  -8 200492. 3415.22   1
  -2   4  -7 298115. 6944.88  -2
   2  -4  -7 298115. 6944.88   1
   2  -4   6 2379.75 645.362  -2
  -2   4   6 2379.75 645.362   1
  -2   4  -5 92554.3 2260.36  -2
   2  -4  -5 92554.3 2260.36   1
   2  -4   4 5226.23 687.769  -2
  -2   4   4 5226.23 687.769   1
  -2   4  -3 2676.34 556.339  -2
   2  -4  -3 2676.34 556.339   1
   2  -4   2 3952.50 555.130  -2
  -2   4   2 3952.50 555.130   1
   2  -4   1 41607.8 740.018  -2
  -2   4   1 41607.8 740.018   1
   2  -4   0 60175.6 1385.68  -2
  -2   4   0 60175.6 1385.68   1
  -2   4   1 33636.2 1081.47  -2
   2  -4   1 33636.2 1081.47   1
   2  -4  -2 3553.36 413.477  -2
  -2   4  -2 3553.36 413.477   1
  -2   4  -3 287.482 64.6593   1
   2  -4  -3 2135.74 507.780  -2
  -2   4  -3 2135.74 507.780   1
   2  -4  -4 5926.27 815.669  -2
  -2   4  -4 5926.27 815.669   1
  -2   4   5 98717.5 3876.73  -2
   2  -4   5 98717.5 3876.73   1
   2  -4  -6 2631.71 683.983  -2
  -2   4  -6 2631.71 683.983   1
   2  -4  -7 479472. 7584.05  -2
  -2   4  -7 479472. 7584.05   1
   2  -4  -8 147044. 5103.02  -2
  -2   4  -8 147044. 5103.02   1
   2  -4  -9 145758. 10135.5  -2
  -2   4  -9 145758. 10135.5   1
   2  -4 -10 3460.78 923.013  -2
  -2   4 -10 3460.78 923.013   1
   2  -4 -11 12595.8 3173.09  -2
  -2   4 -11 12595.8 3173.09   1
   2  -4 -12 20325.5 2795.99  -2
  -2   4 -12 20325.5 2795.99   1
   2  -4 -13 3954.01 1129.33  -2
  -2   4 -13 3954.01 1129.33   1
   2  -4 -14 4486.28 965.806  -2
  -2   4 -14 4486.28 965.806   1
   2  -4 -15 51063.5 2605.99  -2
  -2   4 -15 51063.5 2605.99   1
  -2   4  16 108086. 2258.43  -2
   2  -4  16 108086. 2258.43   1
   2  -4 -17 2069.22 628.398  -2
  -2   4 -17 2069.22 628.398   1
  -2   4  18 1255.55 484.179  -2
   2  -4  18 1255.55 484.179   1
  -2   4  19 4027.57 692.785  -2
   2  -4  19 4027.57 692.785   1
  -2   4  20 1632.59 528.905  -2
   2  -4  20 1632.59 528.905   1
  -2   4  21 5378.51 641.911  -2
   2  -4  21 5378.51 641.911   1
  -2   4  22 2103.68 633.439  -2
   2  -4  22 2103.68 633.439   1
  -2   4  23 27850.5 2981.45  -2
   2  -4  23 27850.5 2981.45   1
  -2   4  24 35143.4 3484.48  -2
   2  -4  24 35143.4 3484.48   1
  -2   4  25 4393.79 505.949  -2
   2  -4  25 4393.79 505.949   1
  -2   4  26 647.726 271.400  -2
   2  -4  26 647.726 271.400   1
  -2   4  27 2691.29 246.231  -2
   2  -4  27 2691.29 246.231   1
   2  -3  27 668.168 232.369  -2
  -2   3  27 668.168 232.369   1
  -2   3 -26 7495.37 409.331  -2
   2  -3 -26 7495.37 409.331   1
  -2   3 -25 54018.3 928.314  -2
   2  -3 -25 54018.3 928.314   1
  -2   3 -24 6133.03 578.475  -2
   2  -3 -24 6133.03 578.475   1
  -2   3 -23 30686.3 930.842  -2
   2  -3 -23 30686.3 930.842   1
  -2   3 -22 29960.9 988.361  -2
   2  -3 -22 29960.9 988.361   1
  -2   3 -21 20917.2 921.848  -2
   2  -3 -21 20917.2 921.848   1
  -2   3 -20 923.291 539.379  -2
   2  -3 -20 923.291 539.379   1
  -2   3 -19 1724.88 566.525  -2
   2  -3 -19 1724.88 566.525   1
   2  -3  18 33366.4 1396.85  -2
  -2   3  18 33366.4 1396.85   1
   2  -3  17 29514.3 1580.75  -2
  -2   3  17 29514.3 1580.75   1
   2  -3  16 15309.1 1369.17  -2
  -2   3  16 15309.1 1369.17   1
   2  -3  15 32748.8 2059.90  -2
  -2   3  15 32748.8 2059.90   1
   2  -3  14 150398. 9675.08  -2
  -2   3  14 150398. 9675.08   1
   2  -3  13 9747.11 1339.86  -2
  -2   3  13 9747.11 1339.86   1
   2  -3  12 2942.22 1035.14  -2
  -2   3  12 2942.22 1035.14   1
   2  -3  11 20323.7 1537.73  -2
  -2   3  11 20323.7 1537.73   1
  -2   3 -10 63659.7 8253.12  -2
   2  -3 -10 63659.7 8253.12   1
  -2   3  -9 111101. 4657.09  -2
   2  -3  -9 111101. 4657.09   1
  -2   3  -8 17200.1 1225.46  -2
   2  -3  -8 17200.1 1225.46   1
   2  -3   7 149785. 3662.04  -2
  -2   3   7 149785. 3662.04   1
  -2   3  -6 92671.1 1973.20  -2
   2  -3  -6 92671.1 1973.20   1
  -2   3  -5 23555.3 995.381  -2
   2  -3  -5 23555.3 995.381   1
  -2   3  -4 1378.30 476.658  -2
   2  -3  -4 1378.30 476.658   1
  -2   3  -3 25587.5 864.128  -2
   2  -3  -3 25587.5 864.128   1
  -2   3  -2 774612. 4278.78  -2
   2  -3  -2 774612. 4278.78   1
   2  -3   1 55942.5 1076.78  -2
  -2   3   1 55942.5 1076.78   1
  -2   3   0 8976.66 433.947  -2
   2  -3   0 8976.66 433.947   1
   2  -3  -1 58826.5 1003.89  -2
  -2   3  -1 58826.5 1003.89   1
  -2   3  -2 459952. 1178.98   1
   2  -3  -2 749898. 3652.73  -2
  -2   3  -2 749898. 3652.73   1
   2  -3  -3 23130.7 800.814  -2
  -2   3  -3 23130.7 800.814   1
  -2   3   4 841.375 488.790  -2
   2  -3   4 841.375 488.790   1
  -2   3   5 21092.5 1043.60  -2
   2  -3   5 21092.5 1043.60   1
  -2   3   6 113585. 2113.10  -2
   2  -3   6 113585. 2113.10   1
   2  -3  -7 117647. 3202.47  -2
  -2   3  -7 117647. 3202.47   1
   2  -3  -8 22064.1 1369.95  -2
  -2   3  -8 22064.1 1369.95   1
   2  -3  -9 88396.4 2535.53  -2
  -2   3  -9 88396.4 2535.53   1
   2  -3 -10 81995.7 2382.53  -2
  -2   3 -10 81995.7 2382.53   1
   2  -3 -11 14879.4 3973.74  -2
  -2   3 -11 14879.4 3973.74   1
   2  -3 -12 1502.22 863.970  -2
  -2   3 -12 1502.22 863.970   1
   2  -3 -13 7267.12 2035.58  -2
  -2   3 -13 7267.12 2035.58   1
   2  -3 -14 172642. 18515.1  -2
  -2   3 -14 172642. 18515.1   1
   2  -3 -15 22481.8 1855.62  -2
  -2   3 -15 22481.8 1855.62   1
   2  -3 -16 19138.4 1405.70  -2
  -2   3 -16 19138.4 1405.70   1
   2  -3 -17 23824.2 1088.99  -2
  -2   3 -17 23824.2 1088.99   1
  -2   3  18 39536.8 1105.64  -2
   2  -3  18 39536.8 1105.64   1
  -2   3  19 1795.91 570.339  -2
   2  -3  19 1795.91 570.339   1
  -2   3  20 526.188 444.535  -2
   2  -3  20 526.188 444.535   1
  -2   3  21 16937.1 1110.49  -2
   2  -3  21 16937.1 1110.49   1
  -2   3  22 27028.1 865.247  -2
   2  -3  22 27028.1 865.247   1
  -2   3  23 23180.6 975.007  -2
   2  -3  23 23180.6 975.007   1
  -2   3  24 7768.09 557.584  -2
   2  -3  24 7768.09 557.584   1
  -2   3  25 48645.2 3891.53  -2
   2  -3  25 48645.2 3891.53   1
  -2   3  26 6337.28 361.727  -2
   2  -3  26 6337.28 361.727   1
   2  -3  27-149.090 191.844   1
   2  -2 -27 276.996 120.885   1
   2  -2 -26 185.252 156.817   1
   2  -2 -25 1926.78 254.661   1
   2  -2 -24 14858.3 472.478   1
   2  -2 -23 4813.75 332.224   1
   2  -2  23 85405.1 1131.15  -2
  -2   2  23 85405.1 1131.15   1
  -2   2  22 109.471 302.100   1
  -2   2 -22 319.885 546.346  -2
   2  -2 -22 319.885 546.346   1
   2  -2 -21 2409.78 306.439   1
  -2   2 -21 8104.81 838.155  -2
   2  -2 -21 8104.81 838.155   1
  -2   2 -20 14950.7 801.622  -2
   2  -2 -20 14950.7 801.622   1
  -2   2 -19 4808.60 728.233  -2
   2  -2 -19 4808.60 728.233   1
   2  -2 -18 179.602 545.195   1
  -2   2 -18 153.699 323.021  -2
   2  -2 -18 153.699 323.021   1
  -2   2  17 11444.6 1194.66   1
  -2   2 -17 14557.1 864.510  -2
   2  -2 -17 14557.1 864.510   1
  -2   2  16 143622. 3503.84   1
   2  -2  16 159207. 9904.78  -2
  -2   2  16 159207. 9904.78   1
  -2   2  15 9084.40 1211.34   1
  -2   2 -15 43099.6 2740.63  -2
   2  -2 -15 43099.6 2740.63   1
  -2   2 -14 3250.42 1086.88  -2
   2  -2 -14 3250.42 1086.88   1
  -2   2 -13 10098.4 1180.67  -2
   2  -2 -13 10098.4 1180.67   1
   2  -2  12 17468.5 1861.31  -2
  -2   2  12 17468.5 1861.31   1
  -2   2 -11 33183.4 2870.15  -2
   2  -2 -11 33183.4 2870.15   1
   2  -2  10 4880.85 965.565  -2
  -2   2  10 4880.85 965.565   1
  -2   2  -9 65364.0 1780.47  -2
   2  -2  -9 65364.0 1780.47   1
  -2   2  -8 313516. 3140.07  -2
   2  -2  -8 313516. 3140.07   1
  -2   2  -7 95502.4 1686.82  -2
   2  -2  -7 95502.4 1686.82   1
   2  -2  -6 5174.43 793.040   1
  -2   2  -6 13448.3 700.712  -2
   2  -2  -6 13448.3 700.712   1
  -2   2  -5 24464.0 840.713  -2
   2  -2  -5 24464.0 840.713   1
  -2   2  -4 4136.13 392.527  -2
   2  -2  -4 4136.13 392.527   1
   2  -2  -3 2673.20 344.818   1
  -2   2  -3 5836.38 507.368  -2
   2  -2  -3 5836.38 507.368   1
   2  -2  -2 2054.40 301.108   1
  -2   2  -2 3582.75 581.735  -2
   2  -2  -2 3582.75 581.735   1
   2  -2  -1 779.568 252.962   1
  -2   2  -1 1409.79 622.777  -2
   2  -2  -1 1409.79 622.777   1
   2  -2   0 633557. 2635.97   1
  -2   2   0 999999. 4809.68  -2
   2  -2   0 999999. 4809.68   1
   2  -2   1 1700.00 229.475   1
  -2   2   1 2157.89 431.922  -2
   2  -2   1 2157.89 431.922   1
  -2   2  -2 1176.93 173.134   1
  -2   2   2 2534.84 814.241  -2
   2  -2   2 2534.84 814.241   1
  -2   2  -3 3091.46 357.565   1
  -2   2   3 5288.22 478.973  -2
   2  -2   3 5288.22 478.973   1
  -2   2   4 5586.20 560.046  -2
   2  -2   4 5586.20 560.046   1
  -2   2   5 32029.6 1059.03  -2
   2  -2   5 32029.6 1059.03   1
   2  -2  -6 14908.8 976.697  -2
  -2   2  -6 14908.8 976.697   1
   2  -2  -7 129090. 2114.35  -2
  -2   2  -7 129090. 2114.35   1
   2  -2  -8 291991. 3861.68  -2
  -2   2  -8 291991. 3861.68   1
   2  -2  -9 76748.1 2179.64  -2
  -2   2  -9 76748.1 2179.64   1
  -2   2 -10 1072.56 590.642   1
   2  -2 -10 4147.16 1008.65  -2
  -2   2 -10 4147.16 1008.65   1
   2  -2 -11 45733.3 1671.77  -2
  -2   2 -11 45733.3 1671.77   1
  -2   2 -12 5519.71 499.187   1
   2  -2 -12 16007.4 1320.01  -2
  -2   2 -12 16007.4 1320.01   1
  -2   2 -13 13487.7 691.802   1
   2  -2 -13 12935.4 1726.55  -2
  -2   2 -13 12935.4 1726.55   1
   2  -2 -14 2567.71 1026.03  -2
  -2   2 -14 2567.71 1026.03   1
   2  -2 -15 52302.7 2063.68  -2
  -2   2 -15 52302.7 2063.68   1
   2  -2 -16 117201. 3308.07  -2
  -2   2 -16 117201. 3308.07   1
  -2   2 -17-602.582 447.429   1
  -2   2  17 9784.91 683.628  -2
   2  -2  17 9784.91 683.628   1
   2  -2 -18 964.916 546.340  -2
  -2   2 -18 964.916 546.340   1
  -2   2  19 5335.90 586.519  -2
   2  -2  19 5335.90 586.519   1
  -2   2  20 16856.6 758.165  -2
   2  -2  20 16856.6 758.165   1
  -2   2  21 9285.43 722.509  -2
   2  -2  21 9285.43 722.509   1
   2  -2  22 144.963 445.333   1
   2  -2  23 93893.0 1558.04   1
   2  -2  24 538.999 406.239   1
   2  -2  25 5719.19 477.607   1
   2  -2  26-18.1022 274.033   1
   2  -2  27 2413.67 259.028   1
   2  -1 -27 150.922 119.305   1
   2  -1 -26 2709.17 219.418   1
  -2   1  25 15844.7 466.087   1
   2  -1 -24-15.0717 221.739   1
   2  -1 -23 15285.9 530.853   1
   2  -1 -22 48267.0 906.251   1
   2  -1 -21 16981.9 592.632   1
  -2   1  20 2717.59 343.710   1
   2  -1 -19 1391.92 316.037   1
   2  -1 -18 6293.01 448.402   1
   2  -1 -17 3786.45 456.073   1
   2  -1 -16 4707.06 797.841   1
   2  -1 -15 12201.8 1228.38   1
   2  -1 -14 1149.11 615.077   1
  -2   1  13 1062.16 606.856   1
  -2   1  12 5669.13 957.680   1
   2  -1 -11 32709.6 2388.00   1
   2  -1 -10 7532.84 616.296   1
   2  -1  -9 112738. 1920.44   1
   2  -1  -8 3479.98 183.789   1
  -2   1  -8 9405.08 881.804  -2
   2  -1  -8 9405.08 881.804   1
   2  -1  -7 120998. 1822.86   1
  -2   1  -7 105663. 794.261  -2
   2  -1  -7 105663. 794.261   1
   2  -1  -6 23372.0 803.750   1
  -2   1  -6 29871.6 448.920  -2
   2  -1  -6 29871.6 448.920   1
   2  -1  -5 100256. 912.460   1
  -2   1  -5 218789. 1138.95  -2
   2  -1  -5 218789. 1138.95   1
   2  -1  -4 979.757 278.993   1
  -2   1  -4 6248.39 293.536  -2
   2  -1  -4 6248.39 293.536   1
   2  -1  -3 7392.94 425.191   1
  -2   1  -3 7352.58 321.191  -2
   2  -1  -3 7352.58 321.191   1
   2  -1  -2 168182. 1362.07   1
  -2   1  -2 343021. 1665.16  -2
   2  -1  -2 343021. 1665.16   1
   2  -1  -1 74583.9 2791.07   1
   2  -1   0 2331.94 277.894   1
  -2   1   0 3978.86 424.895  -2
   2  -1   0 3978.86 424.895   1
  -2   1  -1 140760. 1013.99   1
  -2   1   1 191708. 1703.53  -2
   2  -1   1 191708. 1703.53   1
   2  -1   2 237931. 1529.62   1
  -2   1  -3 91.2621 141.305   1
  -2   1  -4 7950.49 304.234   1
  -2   1  -5 175018. 2413.59   1
  -2   1  -6 18108.9 759.406   1
  -2   1  -7 29302.1 1152.61   1
   2  -1   8 7014.39 600.237   1
  -2   1  -9 46021.3 1365.90   1
  -2   1 -10 11052.0 712.076   1
   2  -1  11 3733.76 573.986   1
  -2   1 -12 378.813 410.868   1
  -2   1 -13 10544.6 759.002   1
  -2   1 -14 173722. 2672.81   1
  -2   1 -15 2383.24 518.168   1
  -2   1 -16 26278.0 1166.09   1
  -2   1 -17 15286.4 1069.04   1
  -2   1 -18 40004.9 1257.95   1
  -2   1 -19 160.712 467.403   1
   2  -1  20 55.7479 421.634   1
   2  -1  21 9393.83 680.703   1
   2  -1  22 17772.0 836.271   1
   2  -1  23 628.083 486.627   1
   2  -1  24 4651.63 500.621   1
   2  -1  25 216.755 336.369   1
   2  -1  26 227.180 272.212   1
   2  -1  27 91.3429 233.122   1
   2  -1  28 2478.70 208.437   1
   2   0 -27 455.362 123.588   1
   2   0 -26 68.3468 144.864   1
   2   0 -25 2422.89 250.347   1
   2   0 -24 85.3758 223.107   1
  -2   0  23 29844.1 688.880   1
  -2   0  22 181.845 259.375   1
   2   0 -21 22140.4 654.325   1
   2   0 -20 1465.65 352.591   1
   2   0 -19 6792.74 454.420   1
   2   0 -18 310.703 342.677   1
   2   0 -17 45444.0 1014.55   1
  -2   0  16 163471. 5716.17   1
  -2   0  15 55141.6 2589.76   1
  -2   0  14 234.695 507.194   1
   2   0 -13 15584.8 1518.43   1
  -2   0  12 31139.4 4983.31   1
   2   0 -11 596.470 403.466   1
  -2   0  10 1247.21 546.957   1
   2   0  -9 7670.90 661.244   1
   2   0  -8 31502.6 1122.86   1
  -2   0   7 7862.63 570.933   1
  -2   0   6 688.982 239.959   1
   2   0  -5 5441.38 312.465   1
   2   0  -4 57815.4 833.006   1
   2   0  -3 13679.6 441.520   1
   2   0  -2 9008.74 360.781   1
  -2   0   1 42925.1 543.769   1
  -2   0   0 704418. 7160.11   1
  -2   0  -1 28904.0 532.408   1
   2   0   2 10681.0 288.064   1
   2   0   3 14840.4 351.996   1
  -2   0  -4 42000.8 705.007   1
   2   0   5 35021.7 1043.87   1
   2   0   6 8479.19 571.680   1
  -2   0  -7 31825.6 1000.60   1
  -2   0  -8 74609.3 1598.29   1
  -2   0  -9 1357.62 463.031   1
  -2   0 -10 982.579 447.191   1
   2   0  11 158.792 378.068   1
  -2   0 -12 1421.76 437.298   1
  -2   0 -13 99.7496 425.802   1
  -2   0 -14 17307.3 941.630   1
  -2   0 -15 12728.0 874.581   1
  -2   0 -16 141763. 2592.54   1
  -2   0 -17 2242.45 503.816   1
   2   0  18 1976.25 527.175   1
   2   0  19 2056.23 539.342   1
   2   0  20-17.5489 416.801   1
   2   0  21 7572.53 1405.05   1
   2   0  22 1635.67 505.077   1
   2   0  23 62381.0 1555.52   1
   2   0  24 4275.95 502.435   1
   2   0  25 2432.22 394.014   1
   2   0  26 168.474 282.168   1
   2   0  27 2077.50 274.271   1
   2   0  28 227.977 180.143   1
  -2  -1  27 206.743 227.357   1
   2   1 -26 110.795 131.934   1
   2   1 -25 1494.37 212.598   1
  -2  -1  24-11.5384 196.625   1
  -2  -1  23 3055.48 334.598   1
   2   1 -22 32516.2 737.301   1
  -2  -1  21 11872.7 518.644   1
  -2  -1  20 373.350 257.770   1
  -2  -1  19 8759.71 478.025   1
  -2  -1  18 64220.8 1426.68   1
  -2  -1  17 1350.95 356.732   1
   2   1 -16 3806.62 691.057   1
  -2  -1  15 1367.27 908.144   1
   2   1 -14 123303. 2249.46   1
   2   1 -13 14811.4 881.926   1
   2   1 -12 118.541 419.380   1
   2   1 -11 43022.8 1404.00   1
   2   1 -10 28137.9 2781.94   1
   2   1  -9 85558.7 10360.6   1
  -2  -1   8 11720.3 761.595   1
   2   1  -7 153798. 4118.05   1
  -2  -1   6 45740.8 982.559   1
  -2  -1   5 49994.9 1153.64   1
  -2  -1   4 3594.52 408.705   1
   2   1  -3 608.598 297.176   1
   2   1  -2 141223. 3639.18   1
   2   1  -1 14264.4 428.069   1
  -2  -1   0 4303.96 186.528   1
  -2  -1  -1 80934.7 577.042   1
  -2  -1  -2 57730.4 904.040   1
  -2  -1  -3 4912.39 329.762   1
   2   1   4 358.454 282.527   1
  -2  -1  -5 104329. 1455.70   1
  -2  -1  -6 23867.2 814.297   1
  -2  -1  -7 79832.8 1551.56   1
  -2  -1  -8 3941.53 534.848   1
  -2  -1  -9 176317. 2599.80   1
   2   1  10 13744.3 736.771   1
  -2  -1 -11 14134.5 838.114   1
  -2  -1 -12 238.685 519.428   1
  -2  -1 -13 15587.7 982.689   1
   2   1  14 6955.69 793.582   1
  -2  -1 -15 15683.7 965.308   1
  -2  -1 -16 9724.31 1206.75   1
  -2  -1 -17 37282.8 1403.41   1
   2   1  18 31305.2 1162.74   1
   2   1  19 350.129 534.727   1
   2   1  20 825.478 466.061   1
   2   1  21 30502.8 1085.47   1
   2   1  22 8614.56 692.162   1
   2   1  23 5023.19 590.924   1
   2   1  24 2959.39 469.486   1
   2   1  25 9012.95 963.452   1
   2   1  26 2414.86 356.474   1
   2   1  27-128.110 247.660   1
   2   1  28 1979.24 238.435   1
  -2  -2  27 2727.98 262.138   1
  -2  -2  26-42.2021 248.081   1
  -2  -2  25 15725.1 987.906   1
   2   2 -24 15316.6 468.570   1
  -2  -2  23 41367.4 774.484   1
  -2  -2  22 1284.56 369.611   1
  -2  -2  21 17434.6 579.725   1
   2   2 -20 1831.46 303.114   1
   2   2 -19 329.752 264.315   1
   2   2 -18 1778.73 315.736   1
   2   2 -17 16068.6 673.647   1
  -2  -2  16 24982.8 1139.05   1
   2   2 -15 43872.7 1456.57   1
   2   2 -14 199.499 429.758   1
   2   2 -13 7662.46 1650.42   1
   2   2 -12 9037.07 1405.87   1
   2   2 -11 34370.8 3411.09   1
   2   2 -10 76.6171 410.311   1
   2   2  -9 119851. 7160.07   1
   2   2  -8 585.866 476.721   1
   2   2  -7 107401. 2468.28   1
  -2  -2   6 6591.83 667.057   1
   2   2  -5 38415.2 1021.29   1
  -2  -2   4 5593.64 497.366   1
   2   2  -3 4353.91 423.260   1
   2   2  -2 127.287 269.445   1
   2   2  -1 173295. 1379.92   1
   2   2   0 914118. 23453.3   1
  -2  -2  -1 63585.5 879.452   1
   2   2   2 5567.12 325.083   1
  -2  -2  -3 9945.81 347.826   1
  -2  -2  -4 1947.81 346.311   1
  -2  -2  -5 3078.42 404.040   1
   2   2   6 4032.25 468.282   1
  -2  -2  -7 43455.6 1152.70   1
   2   2   8 87492.9 1597.70   1
  -2  -2  -9 918.637 396.717   1
   2   2  10 3525.30 535.077   1
  -2  -2 -11 6023.54 627.632   1
  -2  -2 -12 68133.9 2042.42   1
  -2  -2 -13 3100.43 660.372   1
  -2  -2 -14 22090.8 1208.02   1
  -2  -2 -15 3585.98 662.006   1
  -2  -2 -16 212707. 3281.52   1
   2   2  17 2060.06 585.084   1
  -2  -2 -18 4811.99 662.593   1
   2   2  19 3659.72 621.774   1
   2   2  20 62.4855 472.596   1
   2   2  21 3765.73 605.821   1
   2   2  22 2589.86 374.489   1
   2   2  23 13877.8 742.051   1
   2   2  24 10674.8 646.994   1
   2   2  25 369.197 384.136   1
   2   2  26 104.089 289.097   1
   2   2  27 294.543 228.687   1
   2   2  28 10180.5 766.510   1
  -2  -3  27 853.198 212.266   1
  -2  -3  26 798.278 228.663   1
  -2  -3  25 5041.98 431.994   1
  -2  -3  24 1138.43 431.747   1
   2   3 -23 4816.56 329.558   1
   2   3 -22 9926.97 450.906   1
  -2  -3  21 1493.18 282.937   1
   2   3 -20 713.539 299.694   1
   2   3 -19 316.615 259.627   1
   2   3 -18 42542.9 1153.51   1
   2   3 -17 7076.13 517.386   1
   2   3 -16 59.9022 361.435   1
   2   3 -15 11885.1 824.817   1
   2   3 -14 144848. 17142.5   1
  -2  -3  13 19939.2 1056.04   1
   2   3 -12 271.195 439.760   1
   2   3 -11 4759.03 682.416   1
   2   3 -10 29230.0 4067.16   1
   2   3  -9 9751.64 814.106   1
   2   3  -8 4937.09 587.268   1
   2   3   9 153196. 2102.99  -2
  -2  -3   8 153196. 2102.99   1
  -2  -3   7 16377.7 800.555   1
   2   3   8 18435.8 992.014  -2
  -2  -3   7 18435.8 992.014   1
  -2  -3   6 66082.4 2307.22   1
   2   3   7 154132. 2098.33  -2
  -2  -3   6 154132. 2098.33   1
   2   3  -5 28038.3 3622.35   1
   2   3   6 76492.0 1472.91  -2
  -2  -3   5 76492.0 1472.91   1
   2   3  -4 1288.43 384.466   1
   2   3   5 85423.5 1426.02  -2
  -2  -3   4 85423.5 1426.02   1
  -2  -3   3 3159.13 412.000   1
   2   3   4 4357.00 556.323  -2
  -2  -3   3 4357.00 556.323   1
   2   3  -2 103293. 1609.25   1
   2   3   3 108759. 1479.88  -2
  -2  -3   2 108759. 1479.88   1
  -2  -3   1 20108.1 721.736   1
  -2  -3   0 8931.86 392.016   1
   2   3   1 17693.3 907.805  -2
  -2  -3   0 17693.3 907.805   1
   2   3   1 10523.5 435.215   1
   2   3   0 18444.8 921.219  -2
  -2  -3  -1 18444.8 921.219   1
  -2  -3  -2 84404.0 1109.19   1
   2   3  -1 99540.0 2298.35  -2
  -2  -3  -2 99540.0 2298.35   1
  -2  -3  -3 8754.65 478.182   1
  -2  -3   2 92862.0 2896.13  -2
   2   3   3 92862.0 2896.13   1
  -2  -3  -4 1507.54 283.619   1
   2   3  -3 4413.66 614.175  -2
  -2  -3  -4 4413.66 614.175   1
  -2  -3  -5 110246. 1517.30   1
   2   3  -4 120496. 7829.66  -2
  -2  -3  -5 120496. 7829.66   1
  -2  -3  -6 55444.1 1259.80   1
   2   3  -5 81202.2 1578.77  -2
  -2  -3  -6 81202.2 1578.77   1
  -2  -3  -7 111830. 3165.11   1
   2   3  -6 166412. 2161.03  -2
  -2  -3  -7 166412. 2161.03   1
   2   3   8 1481.28 462.553   1
  -2  -3   7 12467.0 854.261  -2
   2   3   8 12467.0 854.261   1
   2   3   9 212552. 2349.80   1
   2   3  -8 212908. 2679.45  -2
  -2  -3  -9 212908. 2679.45   1
  -2  -3 -10 3390.57 524.026   1
   2   3  -9 9757.61 920.548  -2
  -2  -3 -10 9757.61 920.548   1
  -2  -3 -11 15878.5 843.197   1
   2   3 -10 38477.0 1512.07  -2
  -2  -3 -11 38477.0 1512.07   1
   2   3  12 3273.57 740.795   1
   2   3 -11 7276.91 933.949  -2
  -2  -3 -12 7276.91 933.949   1
   2   3  13-104.010 646.311   1
   2   3 -12 1522.69 862.236  -2
  -2  -3 -13 1522.69 862.236   1
  -2  -3 -14 30906.4 1507.11   1
  -2  -3 -15 1468.39 652.044   1
  -2  -3 -16 442.064 552.744   1
  -2  -3 -17 6541.30 721.054   1
  -2  -3  16 9380.31 776.673  -2
   2   3  17 9380.31 776.673   1
  -2  -3 -18 4128.47 430.287   1
  -2  -3  17 9897.83 742.247  -2
   2   3  18 9897.83 742.247   1
   2   3  19 1604.16 347.931   1
   2   3  20 3664.92 415.179   1
   2   3  21 57924.8 1369.96   1
  -2  -3 -22 694.214 292.719   1
  -2  -3 -23 11305.8 534.665   1
  -2  -3 -24 790.330 299.678   1
  -2  -3 -25 55997.7 912.694   1
   2   3  26 671.908 321.453   1
   2   3  27 938.380 236.064   1
  -2  -4  26 105.325 228.813   1
  -2  -4  25 8573.55 648.204   1
  -2  -4  24 29736.6 4080.86   1
   2   4  24 40101.3 876.513  -2
  -2  -4  23 40101.3 876.513   1
   2   4  23 5736.63 519.749  -2
  -2  -4  22 5736.63 519.749   1
   2   4  22 14770.4 726.028  -2
  -2  -4  21 14770.4 726.028   1
  -2  -4 -21 5730.43 1519.26  -2
   2   4 -20 5730.43 1519.26   1
   2   4  20 298.609 221.547  -2
  -2  -4  19 298.609 221.547   1
  -2  -4 -19 2988.87 507.452  -2
   2   4 -18 2988.87 507.452   1
  -2  -4 -18 10895.7 1109.99  -2
   2   4 -17 10895.7 1109.99   1
  -2  -4 -17 17637.2 848.360  -2
   2   4 -16 17637.2 848.360   1
  -2  -4 -16 82435.1 2795.17  -2
   2   4 -15 82435.1 2795.17   1
  -2  -4 -15 21535.6 1497.10  -2
   2   4 -14 21535.6 1497.10   1
   2   4  14 48801.9 75973.0  -2
  -2  -4  13 48801.9 75973.0   1
   2   4  13 3053.19 768.428  -2
  -2  -4  12 3053.19 768.428   1
   2   4  12 82032.3 5136.12  -2
  -2  -4  11 82032.3 5136.12   1
   2   4  11 15458.8 1038.78  -2
  -2  -4  10 15458.8 1038.78   1
   2   4  10 247974. 17423.7  -2
  -2  -4   9 247974. 17423.7   1
   2   4   9 84631.8 6043.81  -2
  -2  -4   8 84631.8 6043.81   1
   2   4   8 233065. 2851.40  -2
  -2  -4   7 233065. 2851.40   1
   2   4   7 291782. 4166.04  -2
  -2  -4   6 291782. 4166.04   1
   2   4   6 86300.2 1626.24  -2
  -2  -4   5 86300.2 1626.24   1
  -2  -4  -5 47924.8 2164.95  -2
   2   4  -4 47924.8 2164.95   1
   2   4   4 14113.6 757.095  -2
  -2  -4   3 14113.6 757.095   1
   2   4  -2 11.1767 266.233   1
   2   4   3 1534.63 603.206  -2
  -2  -4   2 1534.63 603.206   1
   2   4  -1 24613.5 1080.32   1
   2   4   2 24193.8 1016.49  -2
  -2  -4   1 24193.8 1016.49   1
   2   4   1 1928.38 402.015  -2
  -2  -4   0 1928.38 402.015   1
   2   4   0 1914.12 396.244  -2
  -2  -4  -1 1914.12 396.244   1
  -2  -4  -2 1767.76 326.510   1
  -2  -4   1 20225.4 742.976  -2
   2   4   2 20225.4 742.976   1
  -2  -4  -3 1065.26 216.425   1
   2   4  -2 1480.34 446.109  -2
  -2  -4  -3 1480.34 446.109   1
  -2  -4  -4 13870.6 448.676   1
   2   4  -3 16133.8 766.729  -2
  -2  -4  -4 16133.8 766.729   1
   2   4  -4 61322.7 1237.29  -2
  -2  -4  -5 61322.7 1237.29   1
  -2  -4  -6 1385.01 491.376   1
  -2  -4   5 62409.0 1427.78  -2
   2   4   6 62409.0 1427.78   1
  -2  -4   6 372602. 3561.32  -2
   2   4   7 372602. 3561.32   1
  -2  -4   7 175413. 2016.58  -2
   2   4   8 175413. 2016.58   1
  -2  -4   8 98237.2 2152.61  -2
   2   4   9 98237.2 2152.61   1
   2   4  -9 193888. 2586.14  -2
  -2  -4 -10 193888. 2586.14   1
   2   4 -10 19404.0 1229.99  -2
  -2  -4 -11 19404.0 1229.99   1
   2   4 -11 89095.8 4697.32  -2
  -2  -4 -12 89095.8 4697.32   1
  -2  -4  12 4613.23 1037.08  -2
   2   4  13 4613.23 1037.08   1
   2   4 -13 27396.3 1924.31  -2
  -2  -4 -14 27396.3 1924.31   1
  -2  -4  14 23156.1 3055.45  -2
   2   4  15 23156.1 3055.45   1
   2   4 -15 86373.9 3054.24  -2
  -2  -4 -16 86373.9 3054.24   1
  -2  -4  16 14359.1 946.704  -2
   2   4  17 14359.1 946.704   1
   2   4  18 8294.38 1263.91   1
   2   4 -17 11580.3 771.796  -2
  -2  -4 -18 11580.3 771.796   1
  -2  -4  18 4277.34 659.171  -2
   2   4  19 4277.34 659.171   1
  -2  -4  19 1320.45 880.991  -2
   2   4  20 1320.45 880.991   1
   2   4 -20 4920.10 555.793  -2
  -2  -4 -21 4920.10 555.793   1
   2   4 -21 12837.0 754.178  -2
  -2  -4 -22 12837.0 754.178   1
  -2  -4  22 6655.66 574.437  -2
   2   4  23 6655.66 574.437   1
  -2  -4 -24 24377.9 460.489   1
   2   4 -23 39344.1 917.442  -2
  -2  -4 -24 39344.1 917.442   1
  -2  -4 -25 433.059 310.661   1
   2   4  26 554.836 265.397   1
   2   4  27 618.500 298.570   1
   2   5  27 615.716 216.933  -2
  -2  -5  26 615.716 216.933   1
   2   5  26 24048.6 612.660  -2
  -2  -5  25 24048.6 612.660   1
   2   5  25 25018.4 1841.18  -2
  -2  -5  24 25018.4 1841.18   1
   2   5  24 23520.9 733.267  -2
  -2  -5  23 23520.9 733.267   1
   2   5  23 7908.05 649.539  -2
  -2  -5  22 7908.05 649.539   1
   2   5  22 17045.6 788.809  -2
  -2  -5  21 17045.6 788.809   1
   2   5  21 21355.6 1006.79  -2
  -2  -5  20 21355.6 1006.79   1
   2   5  20 2559.89 538.776  -2
  -2  -5  19 2559.89 538.776   1
   2   5  19 20544.3 950.788  -2
  -2  -5  18 20544.3 950.788   1
   2   5  18 27660.0 1124.54  -2
  -2  -5  17 27660.0 1124.54   1
  -2  -5 -17 737.084 661.360  -2
   2   5 -16 737.084 661.360   1
  -2  -5 -16 34511.7 1413.84  -2
   2   5 -15 34511.7 1413.84   1
  -2  -5 -15 132036. 3381.97  -2
   2   5 -14 132036. 3381.97   1
  -2  -5 -14 111732. 3150.21  -2
   2   5 -13 111732. 3150.21   1
  -2  -5 -13 5371.62 2241.12  -2
   2   5 -12 5371.62 2241.12   1
   2   5  12 28209.6 1950.72  -2
  -2  -5  11 28209.6 1950.72   1
   2   5  11 15380.8 2059.28  -2
  -2  -5  10 15380.8 2059.28   1
  -2  -5 -10 27396.0 1636.69  -2
   2   5  -9 27396.0 1636.69   1
   2   5   9 30106.7 1492.24  -2
  -2  -5   8 30106.7 1492.24   1
  -2  -5  -8 39700.4 2009.55  -2
   2   5  -7 39700.4 2009.55   1
  -2  -5  -7 46416.6 1703.05  -2
   2   5  -6 46416.6 1703.05   1
   2   5   6 68786.0 2043.98  -2
  -2  -5   5 68786.0 2043.98   1
   2   5   5 604.564 526.551  -2
  -2  -5   4 604.564 526.551   1
   2   5   4 4841.38 676.533  -2
  -2  -5   3 4841.38 676.533   1
   2   5   3 137871. 2058.75  -2
  -2  -5   2 137871. 2058.75   1
  -2  -5  -2 115528. 2560.75  -2
   2   5  -1 115528. 2560.75   1
   2   5   1 11575.8 635.208  -2
  -2  -5   0 11575.8 635.208   1
   2   5   0 12466.8 988.463  -2
  -2  -5  -1 12466.8 988.463   1
   2   5  -1 146325. 2414.48  -2
  -2  -5  -2 146325. 2414.48   1
  -2  -5   2 107888. 1680.01  -2
   2   5   3 107888. 1680.01   1
  -2  -5   3 4905.52 569.459  -2
   2   5   4 4905.52 569.459   1
  -2  -5   4 106.561 421.843  -2
   2   5   5 106.561 421.843   1
  -2  -5   5 78636.6 2146.60  -2
   2   5   6 78636.6 2146.60   1
   2   5  -6 47867.4 1406.27  -2
  -2  -5  -7 47867.4 1406.27   1
  -2  -5   7 37879.6 1403.78  -2
   2   5   8 37879.6 1403.78   1
   2   5  -8 37487.2 1494.31  -2
  -2  -5  -9 37487.2 1494.31   1
   2   5  -9 29234.0 1711.45  -2
  -2  -5 -10 29234.0 1711.45   1
   2   5 -10 12126.4 1267.36  -2
  -2  -5 -11 12126.4 1267.36   1
   2   5 -11 23056.5 1576.29  -2
  -2  -5 -12 23056.5 1576.29   1
   2   5 -12 8473.09 1316.53  -2
  -2  -5 -13 8473.09 1316.53   1
  -2  -5  13 157370. 5172.44  -2
   2   5  14 157370. 5172.44   1
  -2  -5  14 84024.1 3554.03  -2
   2   5  15 84024.1 3554.03   1
  -2  -5  15 31570.9 1466.26  -2
   2   5  16 31570.9 1466.26   1
   2   5 -16 738.321 816.490  -2
  -2  -5 -17 738.321 816.490   1
  -2  -5  17 37636.5 1254.03  -2
   2   5  18 37636.5 1254.03   1
  -2  -5  18 20319.5 1009.22  -2
   2   5  19 20319.5 1009.22   1
   2   5 -19 2825.51 668.212  -2
  -2  -5 -20 2825.51 668.212   1
   2   5 -20 35930.8 2911.65  -2
  -2  -5 -21 35930.8 2911.65   1
  -2  -5  21 17824.0 864.952  -2
   2   5  22 17824.0 864.952   1
  -2  -5  22 10477.3 754.235  -2
   2   5  23 10477.3 754.235   1
  -2  -5  23 20333.4 711.585  -2
   2   5  24 20333.4 711.585   1
   2   5 -24 35647.2 797.628  -2
  -2  -5 -25 35647.2 797.628   1
   2   5 -25 18797.3 575.043  -2
  -2  -5 -26 18797.3 575.043   1
  -2  -5  26 862.253 229.837  -2
   2   5  27 862.253 229.837   1
   2   6  26 610.943 249.818  -2
  -2  -6  25 610.943 249.818   1
   2   6  25 12719.8 568.476  -2
  -2  -6  24 12719.8 568.476   1
   2   6  24 6587.96 2242.21  -2
  -2  -6  23 6587.96 2242.21   1
   2   6  23 19009.7 4140.08  -2
  -2  -6  22 19009.7 4140.08   1
   2   6  22-128.574 372.699  -2
  -2  -6  21-128.574 372.699   1
   2   6  21 5005.55 4329.18  -2
  -2  -6  20 5005.55 4329.18   1
  -2  -6 -20 671.751 548.606  -2
   2   6 -19 671.751 548.606   1
  -2  -6 -19 390.508 819.045  -2
   2   6 -18 390.508 819.045   1
  -2  -6 -18 3735.28 2119.87  -2
   2   6 -17 3735.28 2119.87   1
   2   6  17 110182. 35314.8  -2
  -2  -6  16 110182. 35314.8   1
  -2  -6 -16 2108.17 629.632  -2
   2   6 -15 2108.17 629.632   1
   2   6  15 17325.5 4708.22  -2
  -2  -6  14 17325.5 4708.22   1
  -2  -6 -14 7778.12 1305.53  -2
   2   6 -13 7778.12 1305.53   1
  -2  -6 -13-2.05477 830.145  -2
   2   6 -12-2.05477 830.145   1
  -2  -6 -12 36392.6 2966.75  -2
   2   6 -11 36392.6 2966.75   1
  -2  -6 -11 24665.3 1787.55  -2
   2   6 -10 24665.3 1787.55   1
  -2  -6 -10 50607.9 7559.38  -2
   2   6  -9 50607.9 7559.38   1
   2   6   9 108798. 3541.17  -2
  -2  -6   8 108798. 3541.17   1
   2   6   8 63872.0 3389.71  -2
  -2  -6   7 63872.0 3389.71   1
   2   6   7 176937. 4544.41  -2
  -2  -6   6 176937. 4544.41   1
   2   6   6 13001.8 1072.95  -2
  -2  -6   5 13001.8 1072.95   1
  -2  -6  -5 31001.7 1496.78  -2
   2   6  -4 31001.7 1496.78   1
   2   6   4 13501.9 928.133  -2
  -2  -6   3 13501.9 928.133   1
   2   6   3 6170.49 723.505  -2
  -2  -6   2 6170.49 723.505   1
   2   6   2 99176.6 2254.18  -2
  -2  -6   1 99176.6 2254.18   1
  -2  -6  -1 102328. 1992.93  -2
   2   6   0 102328. 1992.93   1
   2   6   0 92774.8 2114.18  -2
  -2  -6  -1 92774.8 2114.18   1
   2   6  -1 83556.0 2174.68  -2
  -2  -6  -2 83556.0 2174.68   1
   2   6  -2 6054.94 655.636  -2
  -2  -6  -3 6054.94 655.636   1
   2   6  -3 17044.8 922.827  -2
  -2  -6  -4 17044.8 922.827   1
   2   6  -4 42531.5 1506.59  -2
  -2  -6  -5 42531.5 1506.59   1
  -2  -6   5 13455.0 964.587  -2
   2   6   6 13455.0 964.587   1
  -2  -6   6 220093. 3492.53  -2
   2   6   7 220093. 3492.53   1
   2   6  -7 45875.8 2031.16  -2
  -2  -6  -8 45875.8 2031.16   1
   2   6  -8 119024. 3062.14  -2
  -2  -6  -9 119024. 3062.14   1
  -2  -6   9 43947.2 2965.34  -2
   2   6  10 43947.2 2965.34   1
  -2  -6  10 29520.1 1810.05  -2
   2   6  11 29520.1 1810.05   1
   2   6 -11 31464.0 2042.93  -2
  -2  -6 -12 31464.0 2042.93   1
   2   6 -12 161.125 592.709  -2
  -2  -6 -13 161.125 592.709   1
  -2  -6  13 7522.61 1668.08  -2
   2   6  14 7522.61 1668.08   1
   2   6 -14 35409.7 1149.54  -2
  -2  -6 -15 35409.7 1149.54   1
  -2  -6  15 3187.29 746.625  -2
   2   6  16 3187.29 746.625   1
   2   6 -16 100326. 18074.3  -2
  -2  -6 -17 100326. 18074.3   1
  -2  -6  17 9229.06 842.101  -2
   2   6  18 9229.06 842.101   1
  -2  -6  18 974.626 729.354  -2
   2   6  19 974.626 729.354   1
   2   6 -19 676.752 611.610  -2
  -2  -6 -20 676.752 611.610   1
   2   6 -20 10046.9 4192.82  -2
  -2  -6 -21 10046.9 4192.82   1
   2   6 -21 369.291 445.275  -2
  -2  -6 -22 369.291 445.275   1
  -2  -6  22 63284.8 8490.73  -2
   2   6  23 63284.8 8490.73   1
  -2  -6  23 8114.23 607.744  -2
   2   6  24 8114.23 607.744   1
   2   6 -24 12225.1 545.624  -2
  -2  -6 -25 12225.1 545.624   1
   2   6 -25 562.015 236.429  -2
  -2  -6 -26 562.015 236.429   1
   2   7  26 7925.18 411.199  -2
  -2  -7  25 7925.18 411.199   1
   2   7  25 752.092 382.574  -2
  -2  -7  24 752.092 382.574   1
   2   7  24 13905.3 704.626  -2
  -2  -7  23 13905.3 704.626   1
   2   7  23 8477.71 685.799  -2
  -2  -7  22 8477.71 685.799   1
   2   7  22 25779.1 11705.0  -2
  -2  -7  21 25779.1 11705.0   1
  -2  -7 -21 1676.64 172.909  -2
   2   7 -20 1676.64 172.909   1
   2   7  20 1293.21 655.434  -2
  -2  -7  19 1293.21 655.434   1
   2   7  19 375.565 234.609  -2
  -2  -7  18 375.565 234.609   1
   2   7  18 30721.5 7681.72  -2
  -2  -7  17 30721.5 7681.72   1
  -2  -7 -17 1181.74 594.028  -2
   2   7 -16 1181.74 594.028   1
   2   7  16 73464.4 1916.35  -2
  -2  -7  15 73464.4 1916.35   1
  -2  -7 -15 12899.2 906.660  -2
   2   7 -14 12899.2 906.660   1
  -2  -7 -14 165221. 18477.8  -2
   2   7 -13 165221. 18477.8   1
  -2  -7 -13 796.044 920.763  -2
   2   7 -12 796.044 920.763   1
  -2  -7 -12 17538.0 1541.91  -2
   2   7 -11 17538.0 1541.91   1
   2   7  11 340.814 687.920  -2
  -2  -7  10 340.814 687.920   1
  -2  -7 -10 35633.1 24281.5  -2
   2   7  -9 35633.1 24281.5   1
   2   7   9 11027.8 4716.74  -2
  -2  -7   8 11027.8 4716.74   1
   2   7   8 93976.9 9714.40  -2
  -2  -7   7 93976.9 9714.40   1
   2   7   7 17867.6 4469.82  -2
  -2  -7   6 17867.6 4469.82   1
   2   7   6 38911.3 1871.76  -2
  -2  -7   5 38911.3 1871.76   1
   2   7   5 35272.4 1800.08  -2
  -2  -7   4 35272.4 1800.08   1
  -2  -7  -4 4119.24 506.010  -2
   2   7  -3 4119.24 506.010   1
   2   7   3 92690.7 2521.93  -2
  -2  -7   2 92690.7 2521.93   1
   2   7   2 86990.2 2371.16  -2
  -2  -7   1 86990.2 2371.16   1
  -2  -7  -1 42648.4 895.722  -2
   2   7   0 42648.4 895.722   1
   2   7   0 45575.5 1703.47  -2
  -2  -7  -1 45575.5 1703.47   1
   2   7  -1 107982. 2736.72  -2
  -2  -7  -2 107982. 2736.72   1
   2   7  -2 74551.2 970.611  -2
  -2  -7  -3 74551.2 970.611   1
   2   7  -3 2588.52 286.496  -2
  -2  -7  -4 2588.52 286.496   1
  -2  -7   4 45140.4 785.090  -2
   2   7   5 45140.4 785.090   1
   2   7  -5 45168.9 660.848  -2
  -2  -7  -6 45168.9 660.848   1
   2   7  -6 22174.1 1453.67  -2
  -2  -7  -7 22174.1 1453.67   1
  -2  -7   7 98519.9 6762.14  -2
   2   7   8 98519.9 6762.14   1
   2   7  -8 17928.5 1425.46  -2
  -2  -7  -9 17928.5 1425.46   1
   2   7  -9 51576.7 2416.47  -2
  -2  -7 -10 51576.7 2416.47   1
   2   7 -10-6.96274 282.016  -2
  -2  -7 -11-6.96274 282.016   1
  -2  -7  11 12952.7 1479.38  -2
   2   7  12 12952.7 1479.38   1
  -2  -7  12 480.167 197.597  -2
   2   7  13 480.167 197.597   1
   2   7 -13 140377. 876.896  -2
  -2  -7 -14 140377. 876.896   1
   2   7 -14 6519.89 1258.95  -2
  -2  -7 -15 6519.89 1258.95   1
   2   7 -15 90440.9 896.476  -2
  -2  -7 -16 90440.9 896.476   1
  -2  -7  16 999.762 266.271  -2
   2   7  17 999.762 266.271   1
  -2  -7  17 85468.9 19791.7  -2
   2   7  18 85468.9 19791.7   1
  -2  -7  18 85.2895 215.650  -2
   2   7  19 85.2895 215.650   1
  -2  -7  19 920.360 644.939  -2
   2   7  20 920.360 644.939   1
  -2  -7  20 2760.58 1625.20  -2
   2   7  21 2760.58 1625.20   1
   2   7 -21 28051.9 5108.62  -2
  -2  -7 -22 28051.9 5108.62   1
   2   7 -22 1468.06 5537.99  -2
  -2  -7 -23 1468.06 5537.99   1
   2   7 -23 29910.4 869.891  -2
  -2  -7 -24 29910.4 869.891   1
   2   7 -24 1738.13 1535.44  -2
  -2  -7 -25 1738.13 1535.44   1
  -2  -7  25 10272.4 156.017  -2
   2   7  26 10272.4 156.017   1
   2   8  25 2903.65 256.926  -2
  -2  -8  24 2903.65 256.926   1
   2   8  24 5616.73 393.723  -2
  -2  -8  23 5616.73 393.723   1
   2   8  23 41844.9 1021.69  -2
  -2  -8  22 41844.9 1021.69   1
  -2  -8 -22 568.737 595.070  -2
   2   8 -21 568.737 595.070   1
   2   8  21 21242.9 918.262  -2
  -2  -8  20 21242.9 918.262   1
   2   8  20 452.964 368.786  -2
  -2  -8  19 452.964 368.786   1
   2   8  19 9848.67 722.165  -2
  -2  -8  18 9848.67 722.165   1
   2   8  18 5301.58 780.744  -2
  -2  -8  17 5301.58 780.744   1
   2   8  17 144483. 3134.78  -2
  -2  -8  16 144483. 3134.78   1
   2   8  16 21637.2 1498.51  -2
  -2  -8  15 21637.2 1498.51   1
   2   8  15 56724.3 1654.95  -2
  -2  -8  14 56724.3 1654.95   1
  -2  -8 -14 11110.4 1267.66  -2
   2   8 -13 11110.4 1267.66   1
   2   8  13 9912.23 825.457  -2
  -2  -8  12 9912.23 825.457   1
   2   8  12 3140.51 675.192  -2
  -2  -8  11 3140.51 675.192   1
  -2  -8 -11 2857.98 949.897  -2
   2   8 -10 2857.98 949.897   1
  -2  -8 -10 1174.45 906.328  -2
   2   8  -9 1174.45 906.328   1
  -2  -8  -9 48364.8 2249.24  -2
   2   8  -8 48364.8 2249.24   1
   2   8   8 21222.3 1758.70  -2
  -2  -8   7 21222.3 1758.70   1
   2   8   7 59910.1 2356.12  -2
  -2  -8   6 59910.1 2356.12   1
   2   8   6 5846.56 910.245  -2
  -2  -8   5 5846.56 910.245   1
  -2  -8  -5 26537.6 1692.11  -2
   2   8  -4 26537.6 1692.11   1
   2   8   4 646.481 306.907  -2
  -2  -8   3 646.481 306.907   1
  -2  -8  -3 5751.66 435.361  -2
   2   8  -2 5751.66 435.361   1
   2   8   2 7356.84 447.235  -2
  -2  -8   1 7356.84 447.235   1
  -2  -8  -1 259130. 4999.32  -2
   2   8   0 259130. 4999.32   1
   2   8   0 190511. 3758.29  -2
  -2  -8  -1 190511. 3758.29   1
   2   8  -1 5726.94 858.533  -2
  -2  -8  -2 5726.94 858.533   1
  -2  -8   2 3922.71 736.064  -2
   2   8   3 3922.71 736.064   1
   2   8  -3 613.641 488.976  -2
  -2  -8  -4 613.641 488.976   1
   2   8  -4 26924.7 1476.19  -2
  -2  -8  -5 26924.7 1476.19   1
   2   8  -5 5964.58 1011.12  -2
  -2  -8  -6 5964.58 1011.12   1
  -2  -8   6 70262.0 4887.48  -2
   2   8   7 70262.0 4887.48   1
   2   8  -7 20815.5 1865.05  -2
  -2  -8  -8 20815.5 1865.05   1
  -2  -8   8 36770.3 9108.61  -2
   2   8   9 36770.3 9108.61   1
  -2  -8   9 498.413 830.674  -2
   2   8  10 498.413 830.674   1
  -2  -8  10 4267.29 1077.35  -2
   2   8  11 4267.29 1077.35   1
   2   8 -11 4754.12 851.371  -2
  -2  -8 -12 4754.12 851.371   1
   2   8 -12 8374.11 1442.81  -2
  -2  -8 -13 8374.11 1442.81   1
   2   8 -13 13718.2 1719.74  -2
  -2  -8 -14 13718.2 1719.74   1
   2   8 -14 54124.1 8792.59  -2
  -2  -8 -15 54124.1 8792.59   1
   2   8 -15 22935.5 1468.13  -2
  -2  -8 -16 22935.5 1468.13   1
   2   8 -16 133173. 2609.30  -2
  -2  -8 -17 133173. 2609.30   1
  -2  -8  17 5619.40 863.267  -2
   2   8  18 5619.40 863.267   1
  -2  -8  18 10720.7 997.385  -2
   2   8  19 10720.7 997.385   1
  -2  -8  19 348.778 587.773  -2
   2   8  20 348.778 587.773   1
   2   8 -20 21553.9 6620.60  -2
  -2  -8 -21 21553.9 6620.60   1
   2   8 -21 1449.12 534.555  -2
  -2  -8 -22 1449.12 534.555   1
   2   8 -22 42791.7 2246.23  -2
  -2  -8 -23 42791.7 2246.23   1
   2   8 -23 6452.90 462.118  -2
  -2  -8 -24 6452.90 462.118   1
  -2  -8  24 3177.09 317.550  -2
   2   8  25 3177.09 317.550   1
   2   9  24 12601.1 374.566  -2
  -2  -9  23 12601.1 374.566   1
   2   9  23 10512.3 443.573  -2
  -2  -9  22 10512.3 443.573   1
  -2  -9 -22 34191.7 1529.39  -2
   2   9 -21 34191.7 1529.39   1
  -2  -9 -21 5145.63 487.548  -2
   2   9 -20 5145.63 487.548   1
   2   9  20 143.704 324.907  -2
  -2  -9  19 143.704 324.907   1
   2   9  19 9453.97 720.903  -2
  -2  -9  18 9453.97 720.903   1
   2   9  18 27020.9 1019.98  -2
  -2  -9  17 27020.9 1019.98   1
   2   9  17 4399.11 844.016  -2
  -2  -9  16 4399.11 844.016   1
   2   9  16 17237.0 864.994  -2
  -2  -9  15 17237.0 864.994   1
  -2  -9 -15 32985.1 1125.18  -2
   2   9 -14 32985.1 1125.18   1
   2   9  14 33461.9 1274.70  -2
  -2  -9  13 33461.9 1274.70   1
   2   9  13 10915.4 861.603  -2
  -2  -9  12 10915.4 861.603   1
   2   9  12 8399.84 847.790  -2
  -2  -9  11 8399.84 847.790   1
   2   9  11 15939.1 1032.20  -2
  -2  -9  10 15939.1 1032.20   1
  -2  -9 -10 77725.7 2256.13  -2
   2   9  -9 77725.7 2256.13   1
  -2  -9  -9 58292.8 2563.82  -2
   2   9  -8 58292.8 2563.82   1
   2   9   8 128741. 3409.56  -2
  -2  -9   7 128741. 3409.56   1
  -2  -9  -7 47976.5 2203.06  -2
   2   9  -6 47976.5 2203.06   1
   2   9   6 42273.4 1963.27  -2
  -2  -9   5 42273.4 1963.27   1
   2   9   5 45645.2 2476.36  -2
  -2  -9   4 45645.2 2476.36   1
   2   9   4 3465.68 824.423  -2
  -2  -9   3 3465.68 824.423   1
   2   9   3 3175.72 709.105  -2
  -2  -9   2 3175.72 709.105   1
   2   9   2 18996.2 1353.81  -2
  -2  -9   1 18996.2 1353.81   1
   2   9   1 33316.2 1801.85  -2
  -2  -9   0 33316.2 1801.85   1
   2   9   0 50512.8 2068.89  -2
  -2  -9  -1 50512.8 2068.89   1
   2   9  -1 14999.4 1154.49  -2
  -2  -9  -2 14999.4 1154.49   1
  -2  -9   2 5509.96 828.711  -2
   2   9   3 5509.96 828.711   1
   2   9  -3 2376.67 603.191  -2
  -2  -9  -4 2376.67 603.191   1
   2   9  -4 58229.6 2624.20  -2
  -2  -9  -5 58229.6 2624.20   1
   2   9  -5 27300.4 1946.80  -2
  -2  -9  -6 27300.4 1946.80   1
   2   9  -6 59724.0 2477.58  -2
  -2  -9  -7 59724.0 2477.58   1
   2   9  -7 70324.7 6847.31  -2
  -2  -9  -8 70324.7 6847.31   1
  -2  -9   8 68916.2 1976.79  -2
   2   9   9 68916.2 1976.79   1
   2   9  -9 55868.5 1808.00  -2
  -2  -9 -10 55868.5 1808.00   1
   2   9 -10 12440.9 1342.46  -2
  -2  -9 -11 12440.9 1342.46   1
   2   9 -11 7940.92 920.951  -2
  -2  -9 -12 7940.92 920.951   1
   2   9 -12 14286.8 1344.57  -2
  -2  -9 -13 14286.8 1344.57   1
   2   9 -13 51251.8 2548.80  -2
  -2  -9 -14 51251.8 2548.80   1
   2   9 -14 27391.0 1290.83  -2
  -2  -9 -15 27391.0 1290.83   1
   2   9 -15 17595.0 1083.86  -2
  -2  -9 -16 17595.0 1083.86   1
   2   9 -16 4921.12 757.711  -2
  -2  -9 -17 4921.12 757.711   1
  -2  -9  17 28864.6 1077.80  -2
   2   9  18 28864.6 1077.80   1
  -2  -9  18 8750.90 734.406  -2
   2   9  19 8750.90 734.406   1
   2   9 -19 318.472 565.363  -2
  -2  -9 -20 318.472 565.363   1
   2   9 -20 7739.35 1444.19  -2
  -2  -9 -21 7739.35 1444.19   1
  -2  -9  21 38015.2 2036.26  -2
   2   9  22 38015.2 2036.26   1
  -2  -9  22 10537.8 538.830  -2
   2   9  23 10537.8 538.830   1
   2   9 -23 12682.4 434.487  -2
  -2  -9 -24 12682.4 434.487   1
  -2 -10  22 1939.31 244.816   1
  -2 -10  21 6735.02 272.133   1
   2  10  21 3951.35 387.269  -2
  -2 -10  20 3951.35 387.269   1
  -2 -10 -20 1271.10 404.926  -2
   2  10 -19 1271.10 404.926   1
  -2 -10 -19 1578.33 453.754  -2
   2  10 -18 1578.33 453.754   1
   2  10  18 9318.63 585.776  -2
  -2 -10  17 9318.63 585.776   1
  -2 -10 -17 29772.3 939.752  -2
   2  10 -16 29772.3 939.752   1
  -2 -10 -16 62483.0 1341.65  -2
   2  10 -15 62483.0 1341.65   1
   2  10  15 2263.05 563.784  -2
  -2 -10  14 2263.05 563.784   1
   2  10  14 16077.5 794.243  -2
  -2 -10  13 16077.5 794.243   1
   2  10  13 3338.90 563.482  -2
  -2 -10  12 3338.90 563.482   1
   2  10  12 37117.2 1231.54  -2
  -2 -10  11 37117.2 1231.54   1
  -2 -10 -11 6243.37 731.712  -2
   2  10 -10 6243.37 731.712   1
  -2 -10 -10 45572.5 1580.46  -2
   2  10  -9 45572.5 1580.46   1
   2  10   9 35415.3 1392.72  -2
  -2 -10   8 35415.3 1392.72   1
   2  10   8 74848.4 2221.22  -2
  -2 -10   7 74848.4 2221.22   1
   2  10   7 11708.4 950.569  -2
  -2 -10   6 11708.4 950.569   1
   2  10   6 3978.52 752.448  -2
  -2 -10   5 3978.52 752.448   1
   2  10   5 19041.3 1432.68  -2
  -2 -10   4 19041.3 1432.68   1
   2  10   4 6043.50 943.561  -2
  -2 -10   3 6043.50 943.561   1
   2  10   3 11058.0 1440.48  -2
  -2 -10   2 11058.0 1440.48   1
  -2 -10  -2 6643.75 931.715  -2
   2  10  -1 6643.75 931.715   1
   2  10   1 264056. 4610.20  -2
  -2 -10   0 264056. 4610.20   1
   2  10   0 195193. 3748.29  -2
  -2 -10  -1 195193. 3748.29   1
   2  10  -1 4384.77 728.770  -2
  -2 -10  -2 4384.77 728.770   1
  -2 -10   2 9935.94 1236.12  -2
   2  10   3 9935.94 1236.12   1
  -2 -10   3 6324.17 1020.21  -2
   2  10   4 6324.17 1020.21   1
   2  10  -4 16018.4 1163.42  -2
  -2 -10  -5 16018.4 1163.42   1
   2  10  -5 4522.66 1009.62  -2
  -2 -10  -6 4522.66 1009.62   1
   2  10  -6 7643.54 880.035  -2
  -2 -10  -7 7643.54 880.035   1
   2  10  -7 86578.3 2381.63  -2
  -2 -10  -8 86578.3 2381.63   1
  -2 -10   8 28254.7 1656.63  -2
   2  10   9 28254.7 1656.63   1
   2  10  -9 35362.4 1421.32  -2
  -2 -10 -10 35362.4 1421.32   1
   2  10 -10 7495.61 747.612  -2
  -2 -10 -11 7495.61 747.612   1
  -2 -10  11 49374.5 1403.21  -2
   2  10  12 49374.5 1403.21   1
   2  10 -12 3505.67 696.920  -2
  -2 -10 -13 3505.67 696.920   1
   2  10 -13 19951.9 1321.38  -2
  -2 -10 -14 19951.9 1321.38   1
   2  10 -14 3689.64 721.338  -2
  -2 -10 -15 3689.64 721.338   1
   2  10 -15 85845.4 1712.98  -2
  -2 -10 -16 85845.4 1712.98   1
   2  10 -16 25540.1 1122.92  -2
  -2 -10 -17 25540.1 1122.92   1
   2  10 -17 10173.7 734.013  -2
  -2 -10 -18 10173.7 734.013   1
   2  10  19 1442.67 418.983   1
   2  10 -18 1939.85 525.099  -2
  -2 -10 -19 1939.85 525.099   1
   2  10 -19 2326.45 638.054  -2
  -2 -10 -20 2326.45 638.054   1
  -2 -10  20 5736.55 514.475  -2
   2  10  21 5736.55 514.475   1
   2  10 -21 8571.17 471.414  -2
  -2 -10 -22 8571.17 471.414   1
   2  10  23 32493.0 442.968   1
  -2 -11  20 870.825 370.236   1
   2  11 -19 504.696 209.662   1
   2  11 -18 24986.3 714.968   1
  -2 -11  17 641.800 346.441   1
  -2 -11 -18 1150.42 528.027  -2
   2  11 -17 1150.42 528.027   1
  -2 -11 -17 1630.57 495.269  -2
   2  11 -16 1630.57 495.269   1
   2  11  16 1649.87 529.659  -2
  -2 -11  15 1649.87 529.659   1
   2  11  15 60589.9 1228.28  -2
  -2 -11  14 60589.9 1228.28   1
   2  11  14 2801.92 533.148  -2
  -2 -11  13 2801.92 533.148   1
  -2 -11 -13 12801.8 752.506  -2
   2  11 -12 12801.8 752.506   1
  -2 -11 -12 8553.91 718.153  -2
   2  11 -11 8553.91 718.153   1
   2  11  11 25948.8 1177.48  -2
  -2 -11  10 25948.8 1177.48   1
  -2 -11 -10 39807.5 1754.68  -2
   2  11  -9 39807.5 1754.68   1
   2  11   9 89488.4 2975.82  -2
  -2 -11   8 89488.4 2975.82   1
  -2 -11  -8 58282.7 1423.32  -2
   2  11  -7 58282.7 1423.32   1
   2  11   7 66510.3 1615.81  -2
  -2 -11   6 66510.3 1615.81   1
   2  11   6 9896.36 840.477  -2
  -2 -11   5 9896.36 840.477   1
  -2 -11  -5 46903.9 1609.07  -2
   2  11  -4 46903.9 1609.07   1
   2  11   4 218.823 387.771  -2
  -2 -11   3 218.823 387.771   1
   2  11   3 56221.3 1569.42  -2
  -2 -11   2 56221.3 1569.42   1
   2  11   2 20424.9 1467.69  -2
  -2 -11   1 20424.9 1467.69   1
   2  11   1 3067.74 800.066  -2
  -2 -11   0 3067.74 800.066   1
   2  11   0 5158.39 810.137  -2
  -2 -11  -1 5158.39 810.137   1
   2  11  -1 26390.6 1131.44  -2
  -2 -11  -2 26390.6 1131.44   1
  -2 -11   2 41176.9 1586.55  -2
   2  11   3 41176.9 1586.55   1
   2  11  -3 1030.22 759.580  -2
  -2 -11  -4 1030.22 759.580   1
   2  11  -4 65861.7 1930.84  -2
  -2 -11  -5 65861.7 1930.84   1
   2  11  -5 7230.93 834.333  -2
  -2 -11  -6 7230.93 834.333   1
   2  11   7 76444.0 2320.28   1
   2  11  -6 79319.5 1866.77  -2
  -2 -11  -7 79319.5 1866.77   1
   2  11  -7 39259.3 1142.44  -2
  -2 -11  -8 39259.3 1142.44   1
   2  11  -8 113921. 1942.98  -2
  -2 -11  -9 113921. 1942.98   1
   2  11  -9 29227.5 1057.64  -2
  -2 -11 -10 29227.5 1057.64   1
   2  11 -10 21487.4 1019.00  -2
  -2 -11 -11 21487.4 1019.00   1
   2  11 -11 6996.78 707.899  -2
  -2 -11 -12 6996.78 707.899   1
   2  11 -12 16272.5 884.150  -2
  -2 -11 -13 16272.5 884.150   1
   2  11 -13 2425.84 628.335  -2
  -2 -11 -14 2425.84 628.335   1
   2  11 -14 51205.6 1265.38  -2
  -2 -11 -15 51205.6 1265.38   1
   2  11 -15 1327.21 595.026  -2
  -2 -11 -16 1327.21 595.026   1
   2  11  17 2679.65 377.446   1
   2  11 -16 1866.08 640.653  -2
  -2 -11 -17 1866.08 640.653   1
  -2 -11 -18 608.934 313.733   1
   2  11 -17 543.411 536.155  -2
  -2 -11 -18 543.411 536.155   1
   2  11  19 3215.88 450.496   1
  -2 -11 -20 21.7251 175.333   1
  -2 -11 -21 31522.0 572.170   1
   2  11  22 5604.47 254.042   1
   2  12 -19 304.638 150.987   1
  -2 -12  18 578.060 192.089   1
   2  12 -17 2213.11 258.807   1
  -2 -12  16 461.032 256.521   1
  -2 -12  15 8379.94 446.090   1
  -2 -12  14 966.852 534.579   1
  -2 -12 -15 1381.10 633.761  -2
   2  12 -14 1381.10 633.761   1
  -2 -12  13 43.3442 370.896   1
   2  12  14 4670.20 1830.67  -2
  -2 -12  13 4670.20 1830.67   1
   2  12  13 1073.33 455.238  -2
  -2 -12  12 1073.33 455.238   1
  -2 -12 -12 26062.7 1215.80  -2
   2  12 -11 26062.7 1215.80   1
   2  12  11 560.266 531.586  -2
  -2 -12  10 560.266 531.586   1
  -2 -12 -10 75725.9 1555.49  -2
   2  12  -9 75725.9 1555.49   1
   2  12   9 8467.72 759.113  -2
  -2 -12   8 8467.72 759.113   1
  -2 -12  -8 92869.9 1783.16  -2
   2  12  -7 92869.9 1783.16   1
   2  12   7 25308.5 1031.82  -2
  -2 -12   6 25308.5 1031.82   1
  -2 -12  -6 14163.4 893.189  -2
   2  12  -5 14163.4 893.189   1
  -2 -12  -5 20558.8 945.512  -2
   2  12  -4 20558.8 945.512   1
   2  12  -3 943.870 453.350   1
   2  12   4 5795.58 872.354  -2
  -2 -12   3 5795.58 872.354   1
   2  12   3 1728.63 583.473  -2
  -2 -12   2 1728.63 583.473   1
   2  12   2 12756.6 1002.90  -2
  -2 -12   1 12756.6 1002.90   1
   2  12   1 58047.6 1941.62  -2
  -2 -12   0 58047.6 1941.62   1
   2  12   0 35320.8 2051.82  -2
  -2 -12  -1 35320.8 2051.82   1
   2  12  -1 9733.26 896.135  -2
  -2 -12  -2 9733.26 896.135   1
   2  12  -2 2370.47 922.952  -2
  -2 -12  -3 2370.47 922.952   1
   2  12  -3 7309.82 685.664  -2
  -2 -12  -4 7309.82 685.664   1
   2  12  -4 16324.6 1082.79  -2
  -2 -12  -5 16324.6 1082.79   1
   2  12  -5 12559.6 847.588  -2
  -2 -12  -6 12559.6 847.588   1
   2  12  -6 35809.6 1270.40  -2
  -2 -12  -7 35809.6 1270.40   1
  -2 -12   7 89293.1 1787.60  -2
   2  12   8 89293.1 1787.60   1
   2  12  -8 8838.68 737.889  -2
  -2 -12  -9 8838.68 737.889   1
  -2 -12   9 55916.2 1336.26  -2
   2  12  10 55916.2 1336.26   1
   2  12 -10 570.034 566.803  -2
  -2 -12 -11 570.034 566.803   1
   2  12 -11 29918.1 1056.52  -2
  -2 -12 -12 29918.1 1056.52   1
  -2 -12 -13 92.7754 323.936   1
  -2 -12  12 542.928 571.665  -2
   2  12  13 542.928 571.665   1
   2  12  14 7330.39 524.811   1
   2  12 -13 6563.91 746.677  -2
  -2 -12 -14 6563.91 746.677   1
  -2 -12 -15-6.62740 327.529   1
   2  12 -14 2352.86 732.879  -2
  -2 -12 -15 2352.86 732.879   1
  -2 -12 -16 55652.9 934.368   1
   2  12  17 90.1803 253.967   1
  -2 -12 -18 721.720 227.962   1
   2  12  19 216.170 172.371   1
   2  12  20 89.1897 166.048   1
   2  13 -17 4180.08 289.084   1
   2  13 -16-7.54684 213.860   1
   2  13 -15 594.275 241.032   1
   2  13 -14 43691.6 1570.90   1
  -2 -13  13 86.0338 370.313   1
   2  13 -12-82.4740 291.062   1
   2  13 -11 3559.87 374.631   1
   2  13  12 4546.82 478.238  -2
  -2 -13  11 4546.82 478.238   1
   2  13  11 14424.5 713.558  -2
  -2 -13  10 14424.5 713.558   1
   2  13  10 2691.94 493.717  -2
  -2 -13   9 2691.94 493.717   1
   2  13   9 26483.2 861.523  -2
  -2 -13   8 26483.2 861.523   1
   2  13   8 3805.92 606.942  -2
  -2 -13   7 3805.92 606.942   1
   2  13   7 20482.7 979.845  -2
  -2 -13   6 20482.7 979.845   1
   2  13   6 15359.9 788.865  -2
  -2 -13   5 15359.9 788.865   1
   2  13   5 5660.55 664.205  -2
  -2 -13   4 5660.55 664.205   1
   2  13   4 5447.10 756.366  -2
  -2 -13   3 5447.10 756.366   1
   2  13   3 98661.2 2713.11  -2
  -2 -13   2 98661.2 2713.11   1
   2  13   2 43862.2 1370.76  -2
  -2 -13   1 43862.2 1370.76   1
   2  13   1 7553.69 1033.53  -2
  -2 -13   0 7553.69 1033.53   1
   2  13   0 9367.17 635.676  -2
  -2 -13  -1 9367.17 635.676   1
   2  13  -1 55906.5 1414.84  -2
  -2 -13  -2 55906.5 1414.84   1
   2  13  -2 71725.4 1700.16  -2
  -2 -13  -3 71725.4 1700.16   1
   2  13  -3 11837.2 2491.44  -2
  -2 -13  -4 11837.2 2491.44   1
   2  13  -4 7612.10 642.410  -2
  -2 -13  -5 7612.10 642.410   1
   2  13  -5 20219.5 909.973  -2
  -2 -13  -6 20219.5 909.973   1
  -2 -13   6 22467.9 936.304  -2
   2  13   7 22467.9 936.304   1
   2  13  -7 5476.06 589.199  -2
  -2 -13  -8 5476.06 589.199   1
   2  13   9 27946.2 918.626   1
   2  13  -8 31918.2 981.290  -2
  -2 -13  -9 31918.2 981.290   1
   2  13  -9 2706.34 563.138  -2
  -2 -13 -10 2706.34 563.138   1
   2  13  11 111.375 409.645   1
   2  13 -10 11394.6 1181.94  -2
  -2 -13 -11 11394.6 1181.94   1
   2  13  12 606.969 336.638   1
   2  13 -11 3358.41 723.135  -2
  -2 -13 -12 3358.41 723.135   1
  -2 -13 -13 5818.38 418.379   1
  -2 -13 -14 16437.1 549.074   1
  -2 -13 -15 2091.11 320.870   1
   2  13  16 1038.36 266.097   1
  -2 -13 -17 931.576 219.593   1
   2  13  18 2924.79 211.387   1
  -2 -14  15 1776.25 204.758   1
   2  14 -14 346.747 209.530   1
  -2 -14  13 863.344 237.415   1
   2  14 -12 568.154 279.284   1
   2  14 -11 10893.1 465.608   1
  -2 -14  10 771.868 326.360   1
  -2 -14 -12 11876.3 855.865  -2
   2  14 -10 11876.3 855.865   1
  -2 -14   9 27620.0 745.260   1
  -2 -14 -11 30422.8 794.438  -2
   2  14  -9 30422.8 794.438   1
  -2 -14 -10 5068.60 517.658  -2
   2  14  -8 5068.60 517.658   1
   2  14   9 37919.6 921.684  -2
  -2 -14   7 37919.6 921.684   1
  -2 -14   6 41.3822 437.621   1
   2  14   8 6799.68 2749.02  -2
  -2 -14   6 6799.68 2749.02   1
   2  14   7 52667.0 1091.30  -2
  -2 -14   5 52667.0 1091.30   1
   2  14   6 4437.27 854.251  -2
  -2 -14   4 4437.27 854.251   1
   2  14   5 18891.3 794.606  -2
  -2 -14   3 18891.3 794.606   1
   2  14   4 2707.56 507.658  -2
  -2 -14   2 2707.56 507.658   1
   2  14   3 32203.0 1171.03  -2
  -2 -14   1 32203.0 1171.03   1
   2  14   2 15966.3 4368.68  -2
  -2 -14   0 15966.3 4368.68   1
   2  14   1 6438.72 699.903  -2
  -2 -14  -1 6438.72 699.903   1
   2  14   0 1272.22 828.471  -2
  -2 -14  -2 1272.22 828.471   1
   2  14  -1 25310.4 1056.23  -2
  -2 -14  -3 25310.4 1056.23   1
   2  14  -2 2781.00 590.240  -2
  -2 -14  -4 2781.00 590.240   1
   2  14  -3 22742.7 938.598  -2
  -2 -14  -5 22742.7 938.598   1
   2  14  -4 5460.51 587.617  -2
  -2 -14  -6 5460.51 587.617   1
   2  14  -5 71429.5 1364.52  -2
  -2 -14  -7 71429.5 1364.52   1
  -2 -14   6 10212.7 892.013  -2
   2  14   8 10212.7 892.013   1
   2  14  -7 37091.2 998.805  -2
  -2 -14  -9 37091.2 998.805   1
   2  14  -8 4324.88 560.435  -2
  -2 -14 -10 4324.88 560.435   1
   2  14  11 4669.77 471.431   1
   2  14  -9 27799.1 2593.30  -2
  -2 -14 -11 27799.1 2593.30   1
   2  14  12 14556.1 563.039   1
   2  14 -10 16048.0 1361.05  -2
  -2 -14 -12 16048.0 1361.05   1
   2  14  13 21.4600 264.742   1
   2  14 -11 9360.88 1467.06  -2
  -2 -14 -13 9360.88 1467.06   1
  -2 -14 -14 1208.60 244.954   1
   2  14  15 9475.45 553.077   1
  -2 -14 -16 24004.9 424.989   1
  -2 -15 -14 31148.1 556.927  -2
   2  15 -12 31148.1 556.927   1
  -2 -15 -13 5640.36 379.108  -2
   2  15 -11 5640.36 379.108   1
   2  15  12 4224.41 342.166  -2
  -2 -15  10 4224.41 342.166   1
   2  15  11 10868.4 463.270  -2
  -2 -15   9 10868.4 463.270   1
   2  15  10 208.663 309.833  -2
  -2 -15   8 208.663 309.833   1
  -2 -15  -9 11643.2 509.956  -2
   2  15  -7 11643.2 509.956   1
   2  15   8 8370.93 451.601  -2
  -2 -15   6 8370.93 451.601   1
   2  15   7 5954.85 556.533  -2
  -2 -15   5 5954.85 556.533   1
   2  15   6 13052.2 2921.91  -2
  -2 -15   4 13052.2 2921.91   1
   2  15   5 4353.41 577.317  -2
  -2 -15   3 4353.41 577.317   1
   2  15   4 77957.1 1583.68  -2
  -2 -15   2 77957.1 1583.68   1
   2  15   3 22763.4 15895.3  -2
  -2 -15   1 22763.4 15895.3   1
   2  15   2 34489.4 1060.74  -2
  -2 -15   0 34489.4 1060.74   1
   2  15   1 2151.65 631.261  -2
  -2 -15  -1 2151.65 631.261   1
   2  15   0 45521.6 1368.14  -2
  -2 -15  -2 45521.6 1368.14   1
   2  15  -1 35446.2 9665.57  -2
  -2 -15  -3 35446.2 9665.57   1
   2  15  -2 59357.8 1312.94  -2
  -2 -15  -4 59357.8 1312.94   1
   2  15  -3 4121.43 551.922  -2
  -2 -15  -5 4121.43 551.922   1
   2  15  -4 18188.2 808.533  -2
  -2 -15  -6 18188.2 808.533   1
   2  15  -5 4940.46 643.982  -2
  -2 -15  -7 4940.46 643.982   1
   2  15  -6 8211.05 669.838  -2
  -2 -15  -8 8211.05 669.838   1
   2  15  -7 11071.0 651.026  -2
  -2 -15  -9 11071.0 651.026   1
   2  15  -8 135.318 222.726  -2
  -2 -15 -10 135.318 222.726   1
   2  15  -9 9534.94 564.222  -2
  -2 -15 -11 9534.94 564.222   1
   2  15 -10 4961.04 450.787  -2
  -2 -15 -12 4961.04 450.787   1
   2  15 -11 5002.72 384.957  -2
  -2 -15 -13 5002.72 384.957   1
   2  15  14 36075.6 753.145   1
   2  15 -12 41709.2 641.936  -2
  -2 -15 -14 41709.2 641.936   1
  -2 -16 -10 11730.5 563.630  -2
   2  16  -8 11730.5 563.630   1
   2  16   9 12139.8 500.587  -2
  -2 -16   7 12139.8 500.587   1
   2  16   8 1833.94 334.311  -2
  -2 -16   6 1833.94 334.311   1
   2  16   7 31020.2 849.228  -2
  -2 -16   5 31020.2 849.228   1
   2  16   6 8623.91 487.465  -2
  -2 -16   4 8623.91 487.465   1
   2  16   5 11166.0 1915.54  -2
  -2 -16   3 11166.0 1915.54   1
   2  16   4 3617.48 602.644  -2
  -2 -16   2 3617.48 602.644   1
   2  16   3 23652.9 822.818  -2
  -2 -16   1 23652.9 822.818   1
   2  16   2 38594.5 1673.88  -2
  -2 -16   0 38594.5 1673.88   1
   2  16   1 22730.8 2308.02  -2
  -2 -16  -1 22730.8 2308.02   1
   2  16   0 28118.6 2535.92  -2
  -2 -16  -2 28118.6 2535.92   1
   2  16  -1 17464.6 756.874  -2
  -2 -16  -3 17464.6 756.874   1
   2  16  -2 3731.82 488.404  -2
  -2 -16  -4 3731.82 488.404   1
   2  16  -3 16353.4 732.730  -2
  -2 -16  -5 16353.4 732.730   1
   2  16  -4 7338.50 534.968  -2
  -2 -16  -6 7338.50 534.968   1
   2  16  -5 37262.5 1110.10  -2
  -2 -16  -7 37262.5 1110.10   1
   2  16  -6 1794.29 409.638  -2
  -2 -16  -8 1794.29 409.638   1
   2  16  -7 13071.2 735.767  -2
  -2 -16  -9 13071.2 735.767   1
   2  16  -8 10592.1 676.010  -2
  -2 -16 -10 10592.1 676.010   1
   2  17   3 4689.39 2301.52  -2
  -2 -17   1 4689.39 2301.52   1
   2  17   2 7580.13 2085.22  -2
  -2 -17   0 7580.13 2085.22   1
  -2 -17  -1 12559.5 541.853  -2
   2  17   1 12559.5 541.853   1
  -2 -17   0 8753.36 1769.49  -2
   2  17   2 8753.36 1769.49   1
  -2 -17   1 2124.40 359.940  -2
   2  17   3 2124.40 359.940   1
  -3  16  -6 4732.94 369.688  -2
   3 -16  -7 4732.94 369.688   1
  -3  16  -5 4045.95 479.803  -2
   3 -16  -6 4045.95 479.803   1
  -3  16  -4 5067.54 421.500  -2
   3 -16  -5 5067.54 421.500   1
  -3  16  -3 5297.61 446.809  -2
   3 -16  -4 5297.61 446.809   1
  -3  16  -2 1628.30 362.527  -2
   3 -16  -3 1628.30 362.527   1
  -3  16  -1 1172.07 326.364  -2
   3 -16  -2 1172.07 326.364   1
  -3  16   0 27079.2 3546.04  -2
   3 -16  -1 27079.2 3546.04   1
  -3  16   1 37749.7 997.705  -2
   3 -16   0 37749.7 997.705   1
  -3  16   2 980.304 367.916  -2
   3 -16   1 980.304 367.916   1
  -3  16   3 1613.29 376.968  -2
   3 -16   2 1613.29 376.968   1
  -3  16   4 4657.15 583.600  -2
   3 -16   3 4657.15 583.600   1
  -3  16   5 5298.73 427.202  -2
   3 -16   4 5298.73 427.202   1
  -3  16   6 3702.38 377.668  -2
   3 -16   5 3702.38 377.668   1
  -3  16   7 5010.21 371.723  -2
   3 -16   6 5010.21 371.723   1
  -3  16   8 39380.1 1432.77  -2
   3 -16   7 39380.1 1432.77   1
   3 -15 -12 289.588 138.059   1
   3 -15 -11 630.106 145.368   1
  -3  15 -10 1254.43 352.292  -2
   3 -15 -11 1254.43 352.292   1
   3 -15 -10 9925.39 322.651   1
  -3  15  -9 17678.6 610.056  -2
   3 -15 -10 17678.6 610.056   1
   3 -15  -9 5754.41 709.057   1
  -3  15  -8 6654.44 499.110  -2
   3 -15  -9 6654.44 499.110   1
   3 -15  -8 966.191 345.219   1
  -3  15  -7 4673.48 3229.37  -2
   3 -15  -8 4673.48 3229.37   1
   3 -15  -7 25729.9 658.019   1
  -3  15  -6 28194.3 728.380  -2
   3 -15  -7 28194.3 728.380   1
  -3  15  -5 10119.7 575.996  -2
   3 -15  -6 10119.7 575.996   1
  -3  15  -4 6104.80 529.350  -2
   3 -15  -5 6104.80 529.350   1
  -3  15  -3 4122.10 511.000  -2
   3 -15  -4 4122.10 511.000   1
  -3  15  -2 17880.5 828.145  -2
   3 -15  -3 17880.5 828.145   1
  -3  15  -1 61818.1 2225.92  -2
   3 -15  -2 61818.1 2225.92   1
  -3  15   0 15850.5 874.937  -2
   3 -15  -1 15850.5 874.937   1
  -3  15   1 14241.6 4238.19  -2
   3 -15   0 14241.6 4238.19   1
  -3  15   2 87346.4 1393.13  -2
   3 -15   1 87346.4 1393.13   1
  -3  15   3 18937.6 949.188  -2
   3 -15   2 18937.6 949.188   1
  -3  15   4 3933.64 662.866  -2
   3 -15   3 3933.64 662.866   1
  -3  15   5 7218.19 543.397  -2
   3 -15   4 7218.19 543.397   1
  -3  15   6 9969.66 570.798  -2
   3 -15   5 9969.66 570.798   1
  -3  15   7 22924.4 731.415  -2
   3 -15   6 22924.4 731.415   1
  -3  15   8 2151.92 431.421  -2
   3 -15   7 2151.92 431.421   1
   3 -15   8 695.273 372.440   1
  -3  15   9 5536.02 432.946  -2
   3 -15   8 5536.02 432.946   1
   3 -15   9 8222.43 443.895   1
  -3  15  10 16095.6 543.536  -2
   3 -15   9 16095.6 543.536   1
  -3  15 -10 399.077 246.794   1
  -3  15  11 664.816 223.004  -2
   3 -15  10 664.816 223.004   1
   3 -15  11 167.915 196.091   1
  -3  15  12 89.1850 180.583  -2
   3 -15  11 89.1850 180.583   1
   3 -15  12 58.3548 195.465   1
   3 -14 -15 12525.3 309.189   1
   3 -14 -14 371.966 136.510   1
   3 -14 -13 19287.4 414.118   1
   3 -14 -12 1365.32 210.749   1
   3 -14 -11 1297.57 242.265   1
   3 -14 -10 82.2220 219.546   1
  -3  14 -10 1127.45 397.073  -2
   3 -14 -10 1127.45 397.073   1
   3 -14  -9 1396.20 346.340   1
  -3  14  -9 1614.40 427.466  -2
   3 -14  -9 1614.40 427.466   1
   3 -14  -8 10477.6 442.050   1
  -3  14  -8 28396.6 1747.37  -2
   3 -14  -8 28396.6 1747.37   1
  -3  14  -7 7917.99 812.279  -2
   3 -14  -7 7917.99 812.279   1
  -3  14  -6 4409.56 545.931  -2
   3 -14  -6 4409.56 545.931   1
  -3  14  -5 6887.90 596.012  -2
   3 -14  -5 6887.90 596.012   1
  -3  14  -4 23.6675 462.083  -2
   3 -14  -4 23.6675 462.083   1
   3 -14  -3 732.751 314.050   1
  -3  14  -3 5046.49 765.326  -2
   3 -14  -3 5046.49 765.326   1
  -3  14  -2 5551.45 572.733  -2
   3 -14  -2 5551.45 572.733   1
  -3  14  -1 27231.9 1416.51  -2
   3 -14  -1 27231.9 1416.51   1
  -3  14   0 161972. 2159.70  -2
   3 -14   0 161972. 2159.70   1
  -3  14   1 22068.5 2781.14  -2
   3 -14   1 22068.5 2781.14   1
  -3  14   2 5536.46 649.594  -2
   3 -14   2 5536.46 649.594   1
  -3  14   3 6168.41 828.529  -2
   3 -14   3 6168.41 828.529   1
  -3  14   4 1249.12 491.549  -2
   3 -14   4 1249.12 491.549   1
  -3  14   5 9677.80 752.215  -2
   3 -14   5 9677.80 752.215   1
  -3  14   6 4475.97 571.262  -2
   3 -14   6 4475.97 571.262   1
   3 -14   7 9230.26 730.579   1
   3 -14  -7 10300.9 657.009  -2
  -3  14  -7 10300.9 657.009   1
   3 -14   8 23762.5 899.622   1
   3 -14  -8 33716.3 965.357  -2
  -3  14  -8 33716.3 965.357   1
   3 -14   9 581.599 439.967   1
   3 -14  -9 2103.81 473.300  -2
  -3  14  -9 2103.81 473.300   1
   3 -14  10 865.763 518.686   1
  -3  14  10 658.678 416.733  -2
   3 -14  10 658.678 416.733   1
   3 -14  11 8587.01 580.199   1
  -3  14  11 10663.9 546.413  -2
   3 -14  11 10663.9 546.413   1
   3 -14  12 152.943 245.028   1
  -3  14 -13 248.000 231.984   1
   3 -14  14 5918.15 318.834   1
   3 -13 -17-115.368 140.567   1
   3 -13 -16 1174.28 283.115   1
   3 -13 -15 362.642 175.698   1
   3 -13 -14 29905.8 1079.64   1
   3 -13 -13 1958.10 269.202   1
  -3  13 -13 13757.6 748.754  -2
   3 -13 -13 13757.6 748.754   1
   3 -13 -12 64.1335 227.633   1
  -3  13 -12 129.044 446.410  -2
   3 -13 -12 129.044 446.410   1
  -3  13 -11 7843.24 576.940  -2
   3 -13 -11 7843.24 576.940   1
  -3  13 -10 32728.6 941.019  -2
   3 -13 -10 32728.6 941.019   1
  -3  13  -9 45408.4 1227.01  -2
   3 -13  -9 45408.4 1227.01   1
  -3  13  -8 3287.59 547.314  -2
   3 -13  -8 3287.59 547.314   1
  -3  13  -7 25556.1 908.873  -2
   3 -13  -7 25556.1 908.873   1
  -3  13  -6 49909.4 1195.72  -2
   3 -13  -6 49909.4 1195.72   1
  -3  13  -5 20740.5 922.972  -2
   3 -13  -5 20740.5 922.972   1
   3 -13  -4 7.71955 332.756   1
  -3  13  -4 889.650 495.414  -2
   3 -13  -4 889.650 495.414   1
  -3  13  -3 1404.01 520.893  -2
   3 -13  -3 1404.01 520.893   1
  -3  13  -2 5987.88 677.717  -2
   3 -13  -2 5987.88 677.717   1
  -3  13  -1 28072.8 1072.57  -2
   3 -13  -1 28072.8 1072.57   1
  -3  13   0 2958.44 643.575  -2
   3 -13   0 2958.44 643.575   1
  -3  13   1 33219.9 1172.20  -2
   3 -13   1 33219.9 1172.20   1
  -3  13   2 7220.36 831.650  -2
   3 -13   2 7220.36 831.650   1
  -3  13   3 1741.94 559.223  -2
   3 -13   3 1741.94 559.223   1
  -3  13   4 1075.21 636.713  -2
   3 -13   4 1075.21 636.713   1
  -3  13   5 25897.6 1118.74  -2
   3 -13   5 25897.6 1118.74   1
  -3  13   6 43163.5 1234.86  -2
   3 -13   6 43163.5 1234.86   1
  -3  13   7 22658.6 1211.27  -2
   3 -13   7 22658.6 1211.27   1
  -3  13   8 3434.44 587.723  -2
   3 -13   8 3434.44 587.723   1
  -3  13   9 51290.6 1203.30  -2
   3 -13   9 51290.6 1203.30   1
   3 -13  10 8455.36 666.250   1
   3 -13 -10 31408.7 868.866  -2
  -3  13 -10 31408.7 868.866   1
   3 -13  11 1997.58 477.704   1
  -3  13  11 6168.99 530.196  -2
   3 -13  11 6168.99 530.196   1
   3 -13  12 309.726 434.431   1
   3 -13 -12 203.555 408.772  -2
  -3  13 -12 203.555 408.772   1
   3 -13  13 10393.9 591.862   1
  -3  13  13 13262.9 600.917  -2
   3 -13  13 13262.9 600.917   1
  -3  13 -14 4334.73 364.742   1
   3 -13  15 1530.49 281.726   1
  -3  13 -16 1722.76 236.256   1
  -3  13 -17 19906.4 3040.54   1
   3 -12 -19 105.464 116.024   1
   3 -12 -18 1330.99 176.003   1
   3 -12 -17 9188.30 411.387   1
   3 -12 -16 3780.47 274.371   1
   3 -12 -15 11921.7 433.652   1
  -3  12 -15 16949.5 607.678  -2
   3 -12 -15 16949.5 607.678   1
  -3  12 -14 4295.84 584.944  -2
   3 -12 -14 4295.84 584.944   1
  -3  12 -13 17882.0 723.347  -2
   3 -12 -13 17882.0 723.347   1
  -3  12 -12 10285.2 694.187  -2
   3 -12 -12 10285.2 694.187   1
  -3  12 -11 2006.11 534.338  -2
   3 -12 -11 2006.11 534.338   1
  -3  12 -10 3989.08 576.707  -2
   3 -12 -10 3989.08 576.707   1
  -3  12  -9 51796.2 1245.88  -2
   3 -12  -9 51796.2 1245.88   1
  -3  12  -8 36576.6 1211.35  -2
   3 -12  -8 36576.6 1211.35   1
  -3  12  -7 31748.0 1170.95  -2
   3 -12  -7 31748.0 1170.95   1
  -3  12  -6 3324.43 595.420  -2
   3 -12  -6 3324.43 595.420   1
  -3  12  -5 9094.29 693.938  -2
   3 -12  -5 9094.29 693.938   1
   3 -12  -4 408.177 377.830   1
  -3  12  -4 573.372 449.305  -2
   3 -12  -4 573.372 449.305   1
  -3  12  -3 21398.1 1021.83  -2
   3 -12  -3 21398.1 1021.83   1
  -3  12  -2 2219.86 719.161  -2
   3 -12  -2 2219.86 719.161   1
  -3  12  -1 54467.5 1465.79  -2
   3 -12  -1 54467.5 1465.79   1
  -3  12   0 90587.5 1933.83  -2
   3 -12   0 90587.5 1933.83   1
  -3  12   1 43765.2 1294.43  -2
   3 -12   1 43765.2 1294.43   1
  -3  12   2 2722.64 570.149  -2
   3 -12   2 2722.64 570.149   1
  -3  12   3 26085.4 1204.70  -2
   3 -12   3 26085.4 1204.70   1
  -3  12   4 843.068 578.151  -2
   3 -12   4 843.068 578.151   1
  -3  12   5 7379.48 725.311  -2
   3 -12   5 7379.48 725.311   1
  -3  12   6 4432.33 655.728  -2
   3 -12   6 4432.33 655.728   1
  -3  12   7 32614.7 1396.97  -2
   3 -12   7 32614.7 1396.97   1
  -3  12   8 49916.6 1592.79  -2
   3 -12   8 49916.6 1592.79   1
  -3  12   9 38402.6 1172.39  -2
   3 -12   9 38402.6 1172.39   1
  -3  12  10 4267.89 597.935  -2
   3 -12  10 4267.89 597.935   1
  -3  12  11 2164.97 516.110  -2
   3 -12  11 2164.97 516.110   1
  -3  12  12 9140.99 634.145  -2
   3 -12  12 9140.99 634.145   1
   3 -12  13 1187.56 466.332   1
   3 -12 -13 13056.1 708.324  -2
  -3  12 -13 13056.1 708.324   1
   3 -12  14 4161.81 495.175   1
   3 -12 -14 5063.26 536.918  -2
  -3  12 -14 5063.26 536.918   1
   3 -12  15 5328.43 447.936   1
   3 -12 -15 14977.3 621.117  -2
  -3  12 -15 14977.3 621.117   1
  -3  12  16 34132.8 785.774  -2
   3 -12  16 34132.8 785.774   1
   3 -12  17 688.854 279.977   1
  -3  12  17 7040.39 430.372  -2
   3 -12  17 7040.39 430.372   1
  -3  12 -18 2282.80 246.990   1
  -3  12 -19 3235.12 391.868   1
   3 -11 -20 131.522 119.094   1
  -3  11 -20 197.739 79.3571  -2
   3 -11 -20 197.739 79.3571   1
   3 -11 -19 1720.49 185.437   1
  -3  11 -19 1685.72 278.108  -2
   3 -11 -19 1685.72 278.108   1
  -3  11 -18 7481.63 426.205  -2
   3 -11 -18 7481.63 426.205   1
  -3  11 -17 8502.77 634.439  -2
   3 -11 -17 8502.77 634.439   1
  -3  11 -16 1945.40 468.860  -2
   3 -11 -16 1945.40 468.860   1
  -3  11 -15 14739.1 784.723  -2
   3 -11 -15 14739.1 784.723   1
  -3  11 -14 34459.9 1028.80  -2
   3 -11 -14 34459.9 1028.80   1
  -3  11 -13 8668.47 837.955  -2
   3 -11 -13 8668.47 837.955   1
  -3  11 -12 129.044 505.356  -2
   3 -11 -12 129.044 505.356   1
  -3  11 -11 1495.97 543.046  -2
   3 -11 -11 1495.97 543.046   1
  -3  11 -10 54343.5 1492.88  -2
   3 -11 -10 54343.5 1492.88   1
  -3  11  -9 66065.1 1679.53  -2
   3 -11  -9 66065.1 1679.53   1
  -3  11  -8 14845.1 871.414  -2
   3 -11  -8 14845.1 871.414   1
  -3  11  -7 13095.5 972.054  -2
   3 -11  -7 13095.5 972.054   1
  -3  11  -6 93418.9 1918.67  -2
   3 -11  -6 93418.9 1918.67   1
  -3  11  -5 9725.28 747.074  -2
   3 -11  -5 9725.28 747.074   1
  -3  11  -4 203.287 245.604  -2
   3 -11  -4 203.287 245.604   1
  -3  11  -3 1011.75 533.571  -2
   3 -11  -3 1011.75 533.571   1
  -3  11  -2 40809.4 1577.51  -2
   3 -11  -2 40809.4 1577.51   1
  -3  11  -1 666.049 546.782  -2
   3 -11  -1 666.049 546.782   1
  -3  11   0 8173.30 819.293  -2
   3 -11   0 8173.30 819.293   1
  -3  11   1 1063.91 684.467  -2
   3 -11   1 1063.91 684.467   1
  -3  11   2 38466.1 1512.72  -2
   3 -11   2 38466.1 1512.72   1
  -3  11   3 250.811 209.094  -2
   3 -11   3 250.811 209.094   1
  -3  11   4 163.898 169.262  -2
   3 -11   4 163.898 169.262   1
  -3  11   5 11709.3 978.908  -2
   3 -11   5 11709.3 978.908   1
  -3  11   6 85153.5 1859.00  -2
   3 -11   6 85153.5 1859.00   1
  -3  11   7 16118.2 949.041  -2
   3 -11   7 16118.2 949.041   1
  -3  11   8 16711.1 1089.41  -2
   3 -11   8 16711.1 1089.41   1
  -3  11   9 78642.5 1829.75  -2
   3 -11   9 78642.5 1829.75   1
  -3  11  10 54803.6 1444.82  -2
   3 -11  10 54803.6 1444.82   1
  -3  11  11 1207.83 543.810  -2
   3 -11  11 1207.83 543.810   1
  -3  11  12-212.614 526.362  -2
   3 -11  12-212.614 526.362   1
  -3  11  13 5800.64 620.846  -2
   3 -11  13 5800.64 620.846   1
  -3  11  14 23105.0 877.722  -2
   3 -11  14 23105.0 877.722   1
  -3  11  15 12201.1 628.348  -2
   3 -11  15 12201.1 628.348   1
  -3  11  16 1773.59 450.292  -2
   3 -11  16 1773.59 450.292   1
  -3  11  17 8028.22 574.904  -2
   3 -11  17 8028.22 574.904   1
   3 -11 -18 5219.94 392.732  -2
  -3  11 -18 5219.94 392.732   1
   3 -11 -19 1022.39 293.653  -2
  -3  11 -19 1022.39 293.653   1
   3 -11 -20 668.246 238.227  -2
  -3  11 -20 668.246 238.227   1
  -3  10 -22 1855.40 280.785  -2
   3 -10 -22 1855.40 280.785   1
  -3  10 -21 2039.66 298.562  -2
   3 -10 -21 2039.66 298.562   1
  -3  10 -20 15198.2 570.262  -2
   3 -10 -20 15198.2 570.262   1
  -3  10 -19 222.546 366.867  -2
   3 -10 -19 222.546 366.867   1
  -3  10 -18 3243.25 492.666  -2
   3 -10 -18 3243.25 492.666   1
  -3  10 -17 2388.71 536.787  -2
   3 -10 -17 2388.71 536.787   1
  -3  10 -16 44746.8 1280.11  -2
   3 -10 -16 44746.8 1280.11   1
  -3  10 -15 46143.7 1382.97  -2
   3 -10 -15 46143.7 1382.97   1
  -3  10 -14 7905.36 910.238  -2
   3 -10 -14 7905.36 910.238   1
  -3  10 -13 16870.7 1050.90  -2
   3 -10 -13 16870.7 1050.90   1
  -3  10 -12 21495.6 1093.88  -2
   3 -10 -12 21495.6 1093.88   1
  -3  10 -11 11621.5 881.006  -2
   3 -10 -11 11621.5 881.006   1
  -3  10 -10 5079.88 690.275  -2
   3 -10 -10 5079.88 690.275   1
  -3  10  -9 74606.2 1942.32  -2
   3 -10  -9 74606.2 1942.32   1
  -3  10  -8 43326.0 1914.66  -2
   3 -10  -8 43326.0 1914.66   1
  -3  10  -7 88227.9 3134.53  -2
   3 -10  -7 88227.9 3134.53   1
  -3  10  -6 132.573 258.124  -2
   3 -10  -6 132.573 258.124   1
   3 -10   5 19341.6 1536.29  -2
  -3  10   5 19341.6 1536.29   1
  -3  10  -4 42757.0 1520.33  -2
   3 -10  -4 42757.0 1520.33   1
  -3  10  -3 11252.7 966.611  -2
   3 -10  -3 11252.7 966.611   1
   3 -10   2 4072.08 713.796  -2
  -3  10   2 4072.08 713.796   1
   3 -10   1 75983.7 2112.21  -2
  -3  10   1 75983.7 2112.21   1
  -3  10   0 8063.51 882.794  -2
   3 -10   0 8063.51 882.794   1
  -3  10   1 60427.5 1897.08  -2
   3 -10   1 60427.5 1897.08   1
  -3  10   2 5520.85 688.357  -2
   3 -10   2 5520.85 688.357   1
  -3  10   3 12251.0 913.088  -2
   3 -10   3 12251.0 913.088   1
  -3  10   4 41636.7 1362.31  -2
   3 -10   4 41636.7 1362.31   1
  -3  10   5 15628.9 1121.62  -2
   3 -10   5 15628.9 1121.62   1
  -3  10   6 401.328 388.466  -2
   3 -10   6 401.328 388.466   1
  -3  10   7 105366. 2279.42  -2
   3 -10   7 105366. 2279.42   1
  -3  10   8 38167.9 2115.19  -2
   3 -10   8 38167.9 2115.19   1
  -3  10   9 63250.9 2013.89  -2
   3 -10   9 63250.9 2013.89   1
  -3  10  10 5361.95 715.223  -2
   3 -10  10 5361.95 715.223   1
  -3  10  11 10468.8 874.401  -2
   3 -10  11 10468.8 874.401   1
  -3  10  12 23500.9 1046.18  -2
   3 -10  12 23500.9 1046.18   1
  -3  10  13 12525.6 858.533  -2
   3 -10  13 12525.6 858.533   1
  -3  10  14 7956.32 932.530  -2
   3 -10  14 7956.32 932.530   1
  -3  10  15 51605.7 1674.68  -2
   3 -10  15 51605.7 1674.68   1
  -3  10  16 40968.4 1299.71  -2
   3 -10  16 40968.4 1299.71   1
  -3  10  17 2789.72 537.547  -2
   3 -10  17 2789.72 537.547   1
   3 -10 -18 3904.39 585.712  -2
  -3  10 -18 3904.39 585.712   1
  -3  10  19 126.016 357.469  -2
   3 -10  19 126.016 357.469   1
  -3  10  20 10695.7 458.081  -2
   3 -10  20 10695.7 458.081   1
  -3  10  21 970.825 197.439  -2
   3 -10  21 970.825 197.439   1
  -3  10  22 2748.56 227.357  -2
   3 -10  22 2748.56 227.357   1
  -3   9 -23 17757.4 3393.79  -2
   3  -9 -23 17757.4 3393.79   1
  -3   9 -22 31647.2 789.703  -2
   3  -9 -22 31647.2 789.703   1
  -3   9 -21 14746.8 564.399  -2
   3  -9 -21 14746.8 564.399   1
  -3   9 -20 1128.31 422.417  -2
   3  -9 -20 1128.31 422.417   1
  -3   9 -19 3083.61 547.545  -2
   3  -9 -19 3083.61 547.545   1
  -3   9 -18 21633.5 1067.87  -2
   3  -9 -18 21633.5 1067.87   1
  -3   9 -17 29101.5 1327.34  -2
   3  -9 -17 29101.5 1327.34   1
  -3   9 -16 14158.9 1023.34  -2
   3  -9 -16 14158.9 1023.34   1
  -3   9 -15 93684.6 2485.05  -2
   3  -9 -15 93684.6 2485.05   1
  -3   9 -14 148190. 4311.77  -2
   3  -9 -14 148190. 4311.77   1
  -3   9 -13 15761.8 1173.42  -2
   3  -9 -13 15761.8 1173.42   1
  -3   9 -12 4699.15 696.013  -2
   3  -9 -12 4699.15 696.013   1
  -3   9 -11 184.821 549.406  -2
   3  -9 -11 184.821 549.406   1
  -3   9 -10 20888.4 1309.50  -2
   3  -9 -10 20888.4 1309.50   1
  -3   9  -9 12673.4 1022.39  -2
   3  -9  -9 12673.4 1022.39   1
  -3   9  -8 9002.19 867.259  -2
   3  -9  -8 9002.19 867.259   1
  -3   9  -7 18693.7 1218.25  -2
   3  -9  -7 18693.7 1218.25   1
  -3   9  -6 45496.8 2207.66  -2
   3  -9  -6 45496.8 2207.66   1
   3  -9   5 580.149 265.595  -2
  -3   9   5 580.149 265.595   1
  -3   9  -4 1160.08 620.337  -2
   3  -9  -4 1160.08 620.337   1
  -3   9  -3 11009.3 1179.44  -2
   3  -9  -3 11009.3 1179.44   1
  -3   9  -2 136057. 3629.89  -2
   3  -9  -2 136057. 3629.89   1
  -3   9  -1 43444.5 1591.59  -2
   3  -9  -1 43444.5 1591.59   1
  -3   9   0 26612.3 5397.00  -2
   3  -9   0 26612.3 5397.00   1
  -3   9   1 48067.7 11284.2  -2
   3  -9   1 48067.7 11284.2   1
  -3   9   2 134791. 10705.1  -2
   3  -9   2 134791. 10705.1   1
  -3   9   3 11859.4 1205.95  -2
   3  -9   3 11859.4 1205.95   1
  -3   9   4 957.977 604.312  -2
   3  -9   4 957.977 604.312   1
  -3   9   5 568.670 644.204  -2
   3  -9   5 568.670 644.204   1
  -3   9   6 54514.7 2344.37  -2
   3  -9   6 54514.7 2344.37   1
  -3   9   7 18034.3 1410.79  -2
   3  -9   7 18034.3 1410.79   1
  -3   9   8 12238.1 956.121  -2
   3  -9   8 12238.1 956.121   1
   3  -9  -9 16201.2 1055.54  -2
  -3   9  -9 16201.2 1055.54   1
  -3   9  10 24631.4 1226.44  -2
   3  -9  10 24631.4 1226.44   1
  -3   9  11 245.046 427.879  -2
   3  -9  11 245.046 427.879   1
  -3   9  12 3378.27 622.461  -2
   3  -9  12 3378.27 622.461   1
  -3   9  13 12986.9 919.688  -2
   3  -9  13 12986.9 919.688   1
  -3   9  14 116887. 2352.74  -2
   3  -9  14 116887. 2352.74   1
  -3   9  15 61645.0 1812.23  -2
   3  -9  15 61645.0 1812.23   1
  -3   9  16 12928.3 818.982  -2
   3  -9  16 12928.3 818.982   1
  -3   9  17 15578.6 1665.26  -2
   3  -9  17 15578.6 1665.26   1
  -3   9  18 18118.5 992.367  -2
   3  -9  18 18118.5 992.367   1
   3  -9 -19 2744.41 468.696  -2
  -3   9 -19 2744.41 468.696   1
   3  -9 -20 1083.43 385.502  -2
  -3   9 -20 1083.43 385.502   1
   3  -9 -21 14324.9 611.973  -2
  -3   9 -21 14324.9 611.973   1
   3  -9 -22 29035.5 628.974  -2
  -3   9 -22 29035.5 628.974   1
  -3   9  23 12568.9 365.387  -2
   3  -9  23 12568.9 365.387   1
  -3   8 -24 16352.7 23651.1  -2
   3  -8 -24 16352.7 23651.1   1
  -3   8 -23 38430.0 20754.3  -2
   3  -8 -23 38430.0 20754.3   1
  -3   8 -22 444.094 378.610  -2
   3  -8 -22 444.094 378.610   1
  -3   8 -21 2794.81 444.419  -2
   3  -8 -21 2794.81 444.419   1
  -3   8 -20 8135.87 622.377  -2
   3  -8 -20 8135.87 622.377   1
  -3   8 -19 1261.65 294.723  -2
   3  -8 -19 1261.65 294.723   1
  -3   8 -18 4876.54 753.947  -2
   3  -8 -18 4876.54 753.947   1
  -3   8 -17 11480.3 466.601  -2
   3  -8 -17 11480.3 466.601   1
  -3   8 -16 194086. 43359.1  -2
   3  -8 -16 194086. 43359.1   1
  -3   8 -15 27452.1 803.080  -2
   3  -8 -15 27452.1 803.080   1
  -3   8 -14 2096.94 670.718  -2
   3  -8 -14 2096.94 670.718   1
  -3   8 -13 496.563 161.598  -2
   3  -8 -13 496.563 161.598   1
  -3   8 -12 16954.8 1172.25  -2
   3  -8 -12 16954.8 1172.25   1
  -3   8 -11 19695.1 1158.75  -2
   3  -8 -11 19695.1 1158.75   1
  -3   8 -10 2192.93 679.970  -2
   3  -8 -10 2192.93 679.970   1
  -3   8  -9 27635.3 1945.18  -2
   3  -8  -9 27635.3 1945.18   1
  -3   8  -8 68232.7 10506.4  -2
   3  -8  -8 68232.7 10506.4   1
  -3   8  -7 112296. 3366.50  -2
   3  -8  -7 112296. 3366.50   1
  -3   8  -6 11162.7 1124.45  -2
   3  -8  -6 11162.7 1124.45   1
  -3   8  -5 31468.5 769.601  -2
   3  -8  -5 31468.5 769.601   1
  -3   8  -4 47987.2 739.537  -2
   3  -8  -4 47987.2 739.537   1
  -3   8  -3 3480.79 327.085  -2
   3  -8  -3 3480.79 327.085   1
  -3   8  -2 10425.3 502.904  -2
   3  -8  -2 10425.3 502.904   1
  -3   8  -1 32903.4 1751.71  -2
   3  -8  -1 32903.4 1751.71   1
  -3   8   0 27228.2 4402.13  -2
   3  -8   0 27228.2 4402.13   1
  -3   8   1 25258.5 4807.12  -2
   3  -8   1 25258.5 4807.12   1
   3  -8  -2 9308.76 358.581  -2
  -3   8  -2 9308.76 358.581   1
   3  -8  -3 2932.25 694.786  -2
  -3   8  -3 2932.25 694.786   1
  -3   8   4 40013.6 3774.31  -2
   3  -8   4 40013.6 3774.31   1
   3  -8  -5 24413.9 2731.63  -2
  -3   8  -5 24413.9 2731.63   1
  -3   8   6 10845.0 1166.84  -2
   3  -8   6 10845.0 1166.84   1
   3  -8  -7 113101. 4663.00  -2
  -3   8  -7 113101. 4663.00   1
  -3   8   8 60641.5 2631.21  -2
   3  -8   8 60641.5 2631.21   1
   3  -8  -9 24559.7 1771.12  -2
  -3   8  -9 24559.7 1771.12   1
  -3   8  10 2229.66 645.390  -2
   3  -8  10 2229.66 645.390   1
  -3   8  11 18648.6 1136.30  -2
   3  -8  11 18648.6 1136.30   1
  -3   8  12 18807.3 1686.52  -2
   3  -8  12 18807.3 1686.52   1
  -3   8  13 2269.36 333.196  -2
   3  -8  13 2269.36 333.196   1
  -3   8  14 1239.75 546.203  -2
   3  -8  14 1239.75 546.203   1
  -3   8  15 35004.8 2673.31  -2
   3  -8  15 35004.8 2673.31   1
  -3   8  16 18493.8 10843.0  -2
   3  -8  16 18493.8 10843.0   1
  -3   8  17 9186.25 818.880  -2
   3  -8  17 9186.25 818.880   1
  -3   8  18 5441.95 762.662  -2
   3  -8  18 5441.95 762.662   1
  -3   8  19 1287.52 214.751  -2
   3  -8  19 1287.52 214.751   1
  -3   8  20 6295.76 593.284  -2
   3  -8  20 6295.76 593.284   1
  -3   8  21 1761.18 208.753  -2
   3  -8  21 1761.18 208.753   1
   3  -8 -22 306.002 195.726  -2
  -3   8 -22 306.002 195.726   1
  -3   8  23 13903.3 11570.1  -2
   3  -8  23 13903.3 11570.1   1
  -3   8  24 9314.64 445.436  -2
   3  -8  24 9314.64 445.436   1
  -3   7 -25 11386.7 428.511  -2
   3  -7 -25 11386.7 428.511   1
  -3   7 -24 3465.08 616.857  -2
   3  -7 -24 3465.08 616.857   1
  -3   7 -23 26583.5 2323.22  -2
   3  -7 -23 26583.5 2323.22   1
  -3   7 -22 38968.1 6527.14  -2
   3  -7 -22 38968.1 6527.14   1
  -3   7 -21 17022.2 1895.18  -2
   3  -7 -21 17022.2 1895.18   1
  -3   7 -20 1345.11 557.276  -2
   3  -7 -20 1345.11 557.276   1
  -3   7 -19 5684.31 702.791  -2
   3  -7 -19 5684.31 702.791   1
  -3   7 -18 33331.5 1591.47  -2
   3  -7 -18 33331.5 1591.47   1
  -3   7 -17 20031.6 1464.22  -2
   3  -7 -17 20031.6 1464.22   1
  -3   7 -16 27593.3 3213.53  -2
   3  -7 -16 27593.3 3213.53   1
  -3   7 -15 44679.6 2788.74  -2
   3  -7 -15 44679.6 2788.74   1
  -3   7 -14 58252.3 2097.16  -2
   3  -7 -14 58252.3 2097.16   1
  -3   7 -13 18777.1 1186.43  -2
   3  -7 -13 18777.1 1186.43   1
  -3   7 -12 762.817 743.869  -2
   3  -7 -12 762.817 743.869   1
   3  -7  11 3488.21 1049.94  -2
  -3   7  11 3488.21 1049.94   1
  -3   7 -10 31244.5 1941.10  -2
   3  -7 -10 31244.5 1941.10   1
  -3   7  -9 19622.1 2306.04  -2
   3  -7  -9 19622.1 2306.04   1
   3  -7   8 5337.25 881.322  -2
  -3   7   8 5337.25 881.322   1
   3  -7   7 82484.0 4268.26  -2
  -3   7   7 82484.0 4268.26   1
  -3   7  -6 10658.7 1051.82  -2
   3  -7  -6 10658.7 1051.82   1
  -3   7  -5 9637.03 961.514  -2
   3  -7  -5 9637.03 961.514   1
  -3   7  -4 5825.30 767.468  -2
   3  -7  -4 5825.30 767.468   1
  -3   7  -3 24166.9 1202.54  -2
   3  -7  -3 24166.9 1202.54   1
  -3   7  -2 210367. 3600.87  -2
   3  -7  -2 210367. 3600.87   1
  -3   7  -1 180690. 5091.76  -2
   3  -7  -1 180690. 5091.76   1
  -3   7   0 22707.6 1477.71  -2
   3  -7   0 22707.6 1477.71   1
  -3   7   1 216815. 4290.29  -2
   3  -7   1 216815. 4290.29   1
   3  -7  -2 218275. 7981.39  -2
  -3   7  -2 218275. 7981.39   1
   3  -7  -3 18102.7 1433.50  -2
  -3   7  -3 18102.7 1433.50   1
  -3   7   4 5359.18 760.482  -2
   3  -7   4 5359.18 760.482   1
  -3   7   5 8204.49 921.792  -2
   3  -7   5 8204.49 921.792   1
  -3   7   6 11714.0 1578.34  -2
   3  -7   6 11714.0 1578.34   1
  -3   7   7 53388.4 11382.4  -2
   3  -7   7 53388.4 11382.4   1
  -3   7   8 6355.99 904.301  -2
   3  -7   8 6355.99 904.301   1
  -3   7   9 15346.3 1341.39  -2
   3  -7   9 15346.3 1341.39   1
  -3   7  10 22374.0 1608.70  -2
   3  -7  10 22374.0 1608.70   1
   3  -7 -11 2840.68 833.170  -2
  -3   7 -11 2840.68 833.170   1
   3  -7 -12 87.3708 170.184  -2
  -3   7 -12 87.3708 170.184   1
  -3   7  13 20935.0 1048.08  -2
   3  -7  13 20935.0 1048.08   1
   3  -7 -14 60925.8 1589.86  -2
  -3   7 -14 60925.8 1589.86   1
  -3   7  15 36798.8 1683.76  -2
   3  -7  15 36798.8 1683.76   1
  -3   7  16 27647.2 1173.13  -2
   3  -7  16 27647.2 1173.13   1
  -3   7  17 18114.8 1186.75  -2
   3  -7  17 18114.8 1186.75   1
  -3   7  18 39118.2 2535.71  -2
   3  -7  18 39118.2 2535.71   1
  -3   7  19 4497.21 577.820  -2
   3  -7  19 4497.21 577.820   1
  -3   7  20 403.329 446.282  -2
   3  -7  20 403.329 446.282   1
   3  -7 -21 8323.62 693.674  -2
  -3   7 -21 8323.62 693.674   1
  -3   7  22 30429.9 1555.23  -2
   3  -7  22 30429.9 1555.23   1
  -3   7  23 16088.0 711.019  -2
   3  -7  23 16088.0 711.019   1
  -3   7  24 2971.00 313.095  -2
   3  -7  24 2971.00 313.095   1
  -3   7  25 8186.69 300.998  -2
   3  -7  25 8186.69 300.998   1
   3  -6  25 6524.42 941.338  -2
  -3   6  25 6524.42 941.338   1
   3  -6  24 7994.01 490.529  -2
  -3   6  24 7994.01 490.529   1
  -3   6 -23 46355.5 1043.97  -2
   3  -6 -23 46355.5 1043.97   1
  -3   6 -22 1062.25 491.775  -2
   3  -6 -22 1062.25 491.775   1
  -3   6 -21 4535.86 602.131  -2
   3  -6 -21 4535.86 602.131   1
  -3   6 -20 1999.29 544.486  -2
   3  -6 -20 1999.29 544.486   1
  -3   6 -19 5330.23 734.547  -2
   3  -6 -19 5330.23 734.547   1
  -3   6 -18 98.0320 318.440  -2
   3  -6 -18 98.0320 318.440   1
  -3   6 -17 21028.9 1306.84  -2
   3  -6 -17 21028.9 1306.84   1
  -3   6 -16 126600. 2830.99  -2
   3  -6 -16 126600. 2830.99   1
  -3   6 -15 53354.0 2073.33  -2
   3  -6 -15 53354.0 2073.33   1
  -3   6 -14 8574.76 991.931  -2
   3  -6 -14 8574.76 991.931   1
   3  -6  13 37137.5 2290.17  -2
  -3   6  13 37137.5 2290.17   1
   3  -6  12 4641.14 1113.24  -2
  -3   6  12 4641.14 1113.24   1
  -3   6 -11 39359.6 2180.96  -2
   3  -6 -11 39359.6 2180.96   1
  -3   6 -10 3407.12 934.971  -2
   3  -6 -10 3407.12 934.971   1
  -3   6  -9 8740.77 949.731  -2
   3  -6  -9 8740.77 949.731   1
   3  -6   8 181048. 8277.19  -2
  -3   6   8 181048. 8277.19   1
  -3   6  -7 106786. 3050.84  -2
   3  -6  -7 106786. 3050.84   1
  -3   6  -6 14836.2 1100.39  -2
   3  -6  -6 14836.2 1100.39   1
   3  -6   5 61518.9 2081.49  -2
  -3   6   5 61518.9 2081.49   1
  -3   6  -4 9452.49 1025.18  -2
   3  -6  -4 9452.49 1025.18   1
  -3   6  -3 56120.2 1942.80  -2
   3  -6  -3 56120.2 1942.80   1
  -3   6  -2 25949.2 1782.00  -2
   3  -6  -2 25949.2 1782.00   1
  -3   6  -1 8212.10 727.246  -2
   3  -6  -1 8212.10 727.246   1
  -3   6   0 190774. 3450.64  -2
   3  -6   0 190774. 3450.64   1
  -3   6   1 7734.10 883.800  -2
   3  -6   1 7734.10 883.800   1
  -3   6   2 22938.4 1511.12  -2
   3  -6   2 22938.4 1511.12   1
   3  -6  -3 70879.6 1952.17  -2
  -3   6  -3 70879.6 1952.17   1
   3  -6  -4 8855.80 930.470  -2
  -3   6  -4 8855.80 930.470   1
  -3   6   5 62415.0 4759.67  -2
   3  -6   5 62415.0 4759.67   1
  -3   6   6 16210.1 1224.62  -2
   3  -6   6 16210.1 1224.62   1
   3  -6  -7 135906. 6409.31  -2
  -3   6  -7 135906. 6409.31   1
  -3   6   8 174978. 7729.71  -2
   3  -6   8 174978. 7729.71   1
   3  -6  -9 9027.25 950.212  -2
  -3   6  -9 9027.25 950.212   1
  -3   6  10 5493.98 962.783  -2
   3  -6  10 5493.98 962.783   1
   3  -6 -11 43086.2 1862.59  -2
  -3   6 -11 43086.2 1862.59   1
   3  -6 -12 5826.59 886.371  -2
  -3   6 -12 5826.59 886.371   1
  -3   6  13 29073.6 2684.66  -2
   3  -6  13 29073.6 2684.66   1
   3  -6 -14 12657.7 1163.63  -2
  -3   6 -14 12657.7 1163.63   1
   3  -6 -15 52200.8 1497.46  -2
  -3   6 -15 52200.8 1497.46   1
  -3   6  16 91859.7 3498.76  -2
   3  -6  16 91859.7 3498.76   1
  -3   6  17 15474.6 965.308  -2
   3  -6  17 15474.6 965.308   1
  -3   6  18 109.512 187.002  -2
   3  -6  18 109.512 187.002   1
  -3   6  19 4602.74 568.510  -2
   3  -6  19 4602.74 568.510   1
  -3   6  20 1600.16 448.424  -2
   3  -6  20 1600.16 448.424   1
  -3   6  21 5351.53 524.502  -2
   3  -6  21 5351.53 524.502   1
  -3   6  22 1130.18 409.941  -2
   3  -6  22 1130.18 409.941   1
  -3   6  23 53264.4 957.775  -2
   3  -6  23 53264.4 957.775   1
  -3   6  24 6860.45 696.049  -2
   3  -6  24 6860.45 696.049   1
  -3   6  25 5181.85 302.177  -2
   3  -6  25 5181.85 302.177   1
   3  -5 -26 15036.9 745.767   1
   3  -5 -25 8460.23 328.565   1
  -3   5  24 392.762 252.277   1
  -3   5 -24 5155.17 509.421  -2
   3  -5 -24 5155.17 509.421   1
   3  -5 -23 8759.38 356.001   1
  -3   5 -23 9045.33 613.937  -2
   3  -5 -23 9045.33 613.937   1
   3  -5 -22 39607.8 681.129   1
  -3   5 -22 52530.6 1098.68  -2
   3  -5 -22 52530.6 1098.68   1
  -3   5 -21 13082.8 1033.43  -2
   3  -5 -21 13082.8 1033.43   1
  -3   5 -20 5.09924 531.867  -2
   3  -5 -20 5.09924 531.867   1
  -3   5 -19 4740.85 712.839  -2
   3  -5 -19 4740.85 712.839   1
  -3   5 -18 27670.6 1112.68  -2
   3  -5 -18 27670.6 1112.68   1
  -3   5 -17 20337.9 956.450  -2
   3  -5 -17 20337.9 956.450   1
  -3   5 -16 16431.6 989.783  -2
   3  -5 -16 16431.6 989.783   1
  -3   5 -15 14951.4 1233.21  -2
   3  -5 -15 14951.4 1233.21   1
   3  -5 -14 21907.8 683.992   1
   3  -5  14 66475.2 3133.99  -2
  -3   5  14 66475.2 3133.99   1
  -3   5 -13 31248.2 2936.62  -2
   3  -5 -13 31248.2 2936.62   1
  -3   5 -12 1250.11 750.958  -2
   3  -5 -12 1250.11 750.958   1
  -3   5 -11 12207.1 1213.97  -2
   3  -5 -11 12207.1 1213.97   1
   3  -5  10 40413.5 1796.31  -2
  -3   5  10 40413.5 1796.31   1
  -3   5  -9 167209. 5201.16  -2
   3  -5  -9 167209. 5201.16   1
  -3   5  -8 6586.15 897.180  -2
   3  -5  -8 6586.15 897.180   1
  -3   5  -7 194040. 3068.57  -2
   3  -5  -7 194040. 3068.57   1
  -3   5  -6 22271.4 1363.40  -2
   3  -5  -6 22271.4 1363.40   1
   3  -5   5 28022.1 1210.41  -2
  -3   5   5 28022.1 1210.41   1
  -3   5  -4 6721.23 785.791  -2
   3  -5  -4 6721.23 785.791   1
  -3   5  -3 1368.51 525.172  -2
   3  -5  -3 1368.51 525.172   1
  -3   5  -2 26328.6 943.313  -2
   3  -5  -2 26328.6 943.313   1
  -3   5  -1 49277.8 1278.50  -2
   3  -5  -1 49277.8 1278.50   1
  -3   5   0 354.114 370.917  -2
   3  -5   0 354.114 370.917   1
  -3   5  -1 66670.5 843.424   1
  -3   5   1 66881.4 1439.61  -2
   3  -5   1 66881.4 1439.61   1
  -3   5   2 37634.3 1125.53  -2
   3  -5   2 37634.3 1125.53   1
   3  -5  -3 1109.81 518.655  -2
  -3   5  -3 1109.81 518.655   1
   3  -5  -4 4735.51 943.608  -2
  -3   5  -4 4735.51 943.608   1
  -3   5   5 32821.1 1295.74  -2
   3  -5   5 32821.1 1295.74   1
  -3   5   6 17150.3 1152.46  -2
   3  -5   6 17150.3 1152.46   1
   3  -5  -7 159140. 2948.46  -2
  -3   5  -7 159140. 2948.46   1
   3  -5  -8 6505.00 867.812  -2
  -3   5  -8 6505.00 867.812   1
   3  -5  -9 182013. 2930.42  -2
  -3   5  -9 182013. 2930.42   1
   3  -5 -10 28681.0 1388.40  -2
  -3   5 -10 28681.0 1388.40   1
   3  -5 -11 7764.07 963.099  -2
  -3   5 -11 7764.07 963.099   1
   3  -5 -12 624.079 671.460  -2
  -3   5 -12 624.079 671.460   1
  -3   5  13 37372.0 1561.07  -2
   3  -5  13 37372.0 1561.07   1
   3  -5 -14 77316.2 2378.79  -2
  -3   5 -14 77316.2 2378.79   1
  -3   5  15 15294.4 826.968  -2
   3  -5  15 15294.4 826.968   1
  -3   5  16 17683.7 947.201  -2
   3  -5  16 17683.7 947.201   1
  -3   5  17 21606.7 856.125  -2
   3  -5  17 21606.7 856.125   1
  -3   5  18 31653.5 1011.05  -2
   3  -5  18 31653.5 1011.05   1
  -3   5  19 4514.44 519.792  -2
   3  -5  19 4514.44 519.792   1
  -3   5  20 160.675 336.235  -2
   3  -5  20 160.675 336.235   1
  -3   5  21 10711.5 568.330  -2
   3  -5  21 10711.5 568.330   1
  -3   5  22 42475.4 1428.12  -2
   3  -5  22 42475.4 1428.12   1
   3  -5  23 121.509 323.013   1
  -3   5  23 5874.15 537.113  -2
   3  -5  23 5874.15 537.113   1
   3  -5  24 4792.20 404.828   1
   3  -5  25 2427.51 411.492   1
   3  -5  26 382.345 204.267   1
   3  -4 -26 886.230 165.245   1
   3  -4 -25 17018.6 425.595   1
   3  -4 -24 4432.36 287.874   1
   3  -4 -23 20389.9 483.539   1
   3  -4 -22-99.2431 232.799   1
  -3   4  21 10769.8 495.969   1
   3  -4 -20 3812.48 316.020   1
   3  -4 -19 809.476 246.339   1
   3  -4 -18 1809.44 294.103   1
  -3   4 -18 4316.31 669.913  -2
   3  -4 -18 4316.31 669.913   1
   3  -4 -17 17328.7 668.905   1
  -3   4 -17 21633.7 948.839  -2
   3  -4 -17 21633.7 948.839   1
   3  -4 -16 28696.8 1039.14   1
  -3   4 -16 85461.5 2604.11  -2
   3  -4 -16 85461.5 2604.11   1
  -3   4  15 33689.9 2145.36   1
  -3   4 -15 39814.2 1808.35  -2
   3  -4 -15 39814.2 1808.35   1
   3  -4 -14 1193.99 644.286   1
   3  -4 -13 30763.5 4469.62   1
   3  -4  12 59887.8 2106.95  -2
  -3   4  12 59887.8 2106.95   1
  -3   4 -11 14807.3 1156.17  -2
   3  -4 -11 14807.3 1156.17   1
   3  -4  10 10184.0 1888.69  -2
  -3   4  10 10184.0 1888.69   1
  -3   4  -9 60216.5 3493.85  -2
   3  -4  -9 60216.5 3493.85   1
   3  -4  -8 67748.3 1759.19   1
  -3   4  -8 173741. 13085.2  -2
   3  -4  -8 173741. 13085.2   1
   3  -4  -7 16518.2 932.687   1
   3  -4   7 18285.6 1416.94  -2
  -3   4   7 18285.6 1416.94   1
  -3   4  -6 21816.6 1028.04  -2
   3  -4  -6 21816.6 1028.04   1
  -3   4  -5 6842.57 825.629  -2
   3  -4  -5 6842.57 825.629   1
  -3   4  -4 8696.53 1522.35  -2
   3  -4  -4 8696.53 1522.35   1
  -3   4  -3 54399.5 1270.41  -2
   3  -4  -3 54399.5 1270.41   1
   3  -4  -2 8058.65 601.282   1
  -3   4  -2 17660.5 1377.37  -2
   3  -4  -2 17660.5 1377.37   1
  -3   4  -1 97722.2 1361.97  -2
   3  -4  -1 97722.2 1361.97   1
  -3   4   0 156021. 1583.88   1
  -3   4   0 258505. 2165.36  -2
   3  -4   0 258505. 2165.36   1
  -3   4  -1 31737.9 2653.44   1
   3  -4  -1 77963.9 1445.58  -2
  -3   4  -1 77963.9 1445.58   1
  -3   4  -2 13481.8 848.173   1
  -3   4   2 20078.1 870.414  -2
   3  -4   2 20078.1 870.414   1
  -3   4  -3 52167.7 1104.42   1
   3  -4  -3 64208.8 1362.73  -2
  -3   4  -3 64208.8 1362.73   1
  -3   4  -4 5631.14 488.098   1
   3  -4  -4 10129.3 866.173  -2
  -3   4  -4 10129.3 866.173   1
   3  -4  -5 9161.96 741.033  -2
  -3   4  -5 9161.96 741.033   1
  -3   4   6 23606.9 1062.34  -2
   3  -4   6 23606.9 1062.34   1
   3  -4  -7 15401.6 960.708  -2
  -3   4  -7 15401.6 960.708   1
  -3   4  -8 149849. 7597.43   1
   3  -4  -8 183584. 2948.79  -2
  -3   4  -8 183584. 2948.79   1
  -3   4  -9 1856.41 814.446   1
   3  -4  -9 45706.5 2170.19  -2
  -3   4  -9 45706.5 2170.19   1
  -3   4 -10 13772.5 1269.00   1
   3  -4 -10 13626.2 1417.72  -2
  -3   4 -10 13626.2 1417.72   1
  -3   4 -11 16944.3 929.047   1
  -3   4  11 17145.0 1002.55  -2
   3  -4  11 17145.0 1002.55   1
  -3   4 -12 34726.5 1759.94   1
   3  -4 -12 64115.1 1987.31  -2
  -3   4 -12 64115.1 1987.31   1
  -3   4 -13 2625.80 553.585   1
   3  -4 -13 23961.2 1481.99  -2
  -3   4 -13 23961.2 1481.99   1
  -3   4 -14 13285.4 864.781   1
   3  -4 -14 13620.4 1575.36  -2
  -3   4 -14 13620.4 1575.36   1
  -3   4 -15-42.7738 509.209   1
   3  -4 -15 20279.6 2132.17  -2
  -3   4 -15 20279.6 2132.17   1
  -3   4 -16 62732.1 8110.91   1
  -3   4  16 93009.0 1501.87  -2
   3  -4  16 93009.0 1501.87   1
  -3   4 -17 3946.14 628.506   1
  -3   4  17 17837.2 717.906  -2
   3  -4  17 17837.2 717.906   1
   3  -4  18 2520.56 472.466   1
  -3   4  18 3738.04 531.939  -2
   3  -4  18 3738.04 531.939   1
   3  -4  19 14058.5 724.095   1
  -3   4  19 13595.0 743.525  -2
   3  -4  19 13595.0 743.525   1
   3  -4  20 271.870 399.143   1
   3  -4  21 6846.78 566.485   1
   3  -4  22 6181.99 540.427   1
   3  -4  23 39801.9 973.389   1
   3  -4  24 14369.9 756.551   1
   3  -4  25 2397.90 654.127   1
   3  -4  26 155.105 224.038   1
   3  -3 -26 8589.18 607.433   1
   3  -3 -25 1467.47 204.318   1
   3  -3 -24 683.277 230.887   1
   3  -3 -23 1894.28 277.661   1
   3  -3 -22 26353.5 623.331   1
   3  -3 -21 446.964 292.282   1
   3  -3 -20 68.2336 217.396   1
   3  -3 -19 3691.44 576.960   1
   3  -3 -18 21600.8 602.836   1
   3  -3 -17 2608.40 406.532   1
   3  -3 -16 2811.82 355.579   1
  -3   3  15 743.550 719.385   1
  -3   3  14 74153.7 2992.03   1
   3  -3 -13 4405.07 804.023   1
   3  -3 -12 1929.52 638.073   1
   3  -3 -11 964.443 584.611   1
  -3   3  10 73249.4 4226.41   1
  -3   3   9 36422.4 3544.52   1
   3  -3  -8 24275.1 1966.53   1
   3  -3  -7 59585.6 8042.63   1
  -3   3   6 116893. 1920.86   1
   3  -3  -5 2850.81 1225.37   1
   3  -3  -4 267.043 310.269   1
   3  -3  -3 4298.34 468.479   1
   3  -3  -2 9259.22 546.661   1
   3  -3  -1 3097.13 425.565   1
   3  -3   0 12977.3 553.233   1
  -3   3  -1 30666.3 722.337   1
   3  -3   2 210.337 197.633   1
  -3   3  -3 622.843 322.447   1
  -3   3  -4 11990.9 740.991   1
  -3   3   4 12531.9 586.659  -2
   3  -3   4 12531.9 586.659   1
  -3   3  -5 95613.6 1933.96   1
  -3   3   5 99667.2 1394.01  -2
   3  -3   5 99667.2 1394.01   1
  -3   3  -6 57418.4 1414.95   1
  -3   3  -7 77930.2 1806.08   1
   3  -3   8 10146.3 832.502   1
   3  -3   9 220072. 2916.65   1
   3  -3  10 14841.6 1051.22   1
  -3   3 -11 291.351 481.245   1
  -3   3 -12 507.742 467.884   1
  -3   3 -13 26235.3 1160.79   1
  -3   3 -14 6975.81 705.154   1
  -3   3 -15 2415.70 663.821   1
  -3   3 -16 3418.01 580.986   1
   3  -3  17 25232.7 1105.36   1
  -3   3 -18 5384.27 613.996   1
   3  -3  19 838.516 461.548   1
   3  -3  20 871.056 445.517   1
   3  -3  21 34955.2 1039.04   1
   3  -3  22 368.408 411.559   1
   3  -3  23 3593.20 467.475   1
   3  -3  24 470.689 443.757   1
   3  -3  25 30448.4 3660.15   1
   3  -3  26 87.7998 235.901   1
   3  -3  27 189.593 174.007   1
   3  -2 -27 2345.39 161.774   1
   3  -2 -26 530.751 156.044   1
   3  -2 -25 9910.23 380.846   1
   3  -2 -24 37703.5 702.606   1
   3  -2 -23 23108.1 679.222   1
   3  -2 -22 124.682 271.327   1
   3  -2 -21 6217.81 422.461   1
   3  -2 -20 10115.9 454.327   1
   3  -2 -19 525.753 329.500   1
   3  -2 -18 2876.58 306.681   1
   3  -2 -17 24667.3 833.602   1
   3  -2 -16 307.417 305.092   1
   3  -2 -15 20072.5 1374.99   1
   3  -2 -14 493.830 584.618   1
  -3   2  13 15952.7 1220.27   1
  -3   2  12 42516.0 1691.22   1
   3  -2 -11 7564.86 670.724   1
   3  -2 -10 6093.39 621.747   1
   3  -2  -9 96057.4 1855.29   1
   3  -2  -8 3077.82 484.350   1
   3  -2  -7 104065. 1730.66   1
   3  -2  -6 205.472 167.517   1
   3  -2  -5 36491.1 787.399   1
  -3   2   4 46412.1 1048.74   1
   3  -2  -3 1276.53 318.816   1
   3  -2  -2 1621.36 324.870   1
   3  -2  -1 96188.5 3520.17   1
   3  -2   0 95903.9 1123.55   1
  -3   2  -1 13349.9 520.315   1
   3  -2   2 22759.0 665.965   1
   3  -2   3 2100.03 321.965   1
  -3   2  -4 31138.7 799.528   1
  -3   2  -5 1278.11 383.673   1
   3  -2   6 4230.64 513.640   1
   3  -2   7 110025. 1962.01   1
   3  -2   8 113272. 1971.34   1
   3  -2   9 932.858 522.822   1
   3  -2  10 7626.50 730.393   1
  -3   2 -11 4952.11 624.978   1
  -3   2 -12 49025.2 2190.40   1
  -3   2 -13 93.3362 386.716   1
  -3   2 -14 17282.7 965.290   1
  -3   2 -15 9150.01 738.994   1
  -3   2 -16 125059. 2391.46   1
  -3   2 -17 6389.48 637.155   1
  -3   2 -18 8319.01 706.231   1
   3  -2  19-23.8093 442.741   1
   3  -2  20 826.187 431.589   1
   3  -2  21 463.950 423.565   1
   3  -2  22 11642.1 635.445   1
   3  -2  23 2438.57 636.546   1
   3  -2  24 18733.2 712.501   1
   3  -2  25 949.704 334.927   1
   3  -2  26 382.042 255.558   1
   3  -2  27 732.467 194.505   1
   3  -1 -27 178.270 109.482   1
   3  -1 -26 122.813 146.128   1
   3  -1 -25 2751.85 257.118   1
   3  -1 -24 425.078 243.678   1
   3  -1 -23 15288.0 580.603   1
   3  -1 -22 1432.03 314.937   1
  -3   1  21 5854.41 431.175   1
   3  -1 -20 3669.21 384.354   1
   3  -1 -19 803.138 263.703   1
   3  -1 -18 57504.6 1672.54   1
   3  -1 -17 21750.4 790.511   1
   3  -1 -16 2262.08 418.936   1
  -3   1  15 41796.9 1793.26   1
  -3   1  14 91471.0 3079.28   1
   3  -1 -13 4406.71 680.147   1
  -3   1  12-33.0651 499.201   1
   3  -1 -11-111.312 460.061   1
   3  -1 -10 21563.5 1136.99   1
   3  -1  -9 2299.68 577.420   1
  -3   1   8 16716.4 1000.03   1
   3  -1  -7 159.105 259.110   1
   3  -1  -6 54443.1 1823.83   1
   3  -1  -5 189.868 216.989   1
  -3   1   4 329.593 243.305   1
   3  -1  -3 2269.12 326.818   1
  -3   1   2 151832. 1576.81   1
  -3   1   1 1385.23 298.299   1
  -3   1   0 44180.8 676.744   1
  -3   1  -1 2400.13 291.003   1
  -3   1  -2 82004.5 1070.28   1
  -3   1  -3 7325.90 456.755   1
   3  -1   4 2837.40 223.705   1
  -3   1  -5 14303.9 475.260   1
  -3   1  -6 76448.7 1265.94   1
  -3   1  -7 16930.2 641.521   1
  -3   1  -8 12688.0 729.881   1
  -3   1  -9 74627.4 1925.79   1
  -3   1 -10 31189.3 1233.66   1
  -3   1 -11 6952.38 740.229   1
  -3   1 -12 5160.47 637.608   1
  -3   1 -13 11998.6 772.840   1
  -3   1 -14 18682.2 1096.10   1
  -3   1 -15 516.163 418.945   1
  -3   1 -16 1285.27 471.506   1
  -3   1 -17 8836.27 742.197   1
  -3   1 -18 1628.29 535.586   1
   3  -1  19 4518.25 578.214   1
   3  -1  20 10021.5 703.003   1
   3  -1  21 42424.9 1142.13   1
   3  -1  22 12357.8 677.928   1
   3  -1  23 7790.29 571.124   1
   3  -1  24 486.120 362.064   1
   3  -1  25 28357.0 3366.45   1
   3  -1  26 983.198 271.752   1
   3  -1  27 418.367 185.760   1
   3   0 -27 3363.88 167.050   1
   3   0 -26-28.1475 138.330   1
   3   0 -25 577.209 196.424   1
   3   0 -24 27610.0 944.601   1
   3   0 -23 15695.7 532.072   1
   3   0 -22 96.3786 289.694   1
   3   0 -21 9251.49 483.730   1
   3   0 -20 14069.5 574.346   1
   3   0 -19 432.329 290.908   1
   3   0 -18 6486.90 535.292   1
   3   0 -17 2990.56 413.704   1
  -3   0  16 105520. 1401.79   1
   3   0 -15 179.060 610.960   1
   3   0 -14 480.212 567.289   1
   3   0 -13 1805.04 549.028   1
  -3   0  12 1717.35 521.937   1
   3   0 -11 64726.5 3305.86   1
   3   0 -10 4262.25 763.582   1
   3   0  -9 99591.5 3868.93   1
  -3   0   8 99500.8 5715.68   1
  -3   0  -9 118955. 1332.44  -2
   3   0  -8 118955. 1332.44   1
   3   0  -7 90024.2 1384.70   1
  -3   0  -8 93278.3 1167.61  -2
   3   0  -7 93278.3 1167.61   1
   3   0  -6 1485.15 392.860   1
  -3   0  -7 163045. 1660.50  -2
   3   0  -6 163045. 1660.50   1
   3   0  -5 70101.7 1445.08   1
  -3   0  -6 73650.3 1015.91  -2
   3   0  -5 73650.3 1015.91   1
  -3   0   4 17540.3 644.868   1
   3   0  -3 960.486 283.783   1
   3   0   4 8282.75 700.870  -2
  -3   0   3 8282.75 700.870   1
  -3   0   2 9548.87 402.203   1
   3   0   3 17144.8 788.439  -2
  -3   0   2 17144.8 788.439   1
  -3   0   1 220280. 1163.10   1
   3   0   2 236909. 2159.47  -2
  -3   0   1 236909. 2159.47   1
   3   0   0 1552.20 333.825   1
   3   0   1 30355.9 992.789  -2
  -3   0   0 30355.9 992.789   1
   3   0   1 40158.3 985.763   1
   3   0   0 38245.1 1276.62  -2
  -3   0  -1 38245.1 1276.62   1
  -3   0  -2 5048.27 382.281   1
  -3   0   1 172701. 8564.66  -2
   3   0   2 172701. 8564.66   1
  -3   0  -3 7029.09 351.835   1
  -3   0   2 14347.1 448.432  -2
   3   0   3 14347.1 448.432   1
  -3   0  -4 10023.2 436.259   1
   3   0  -3 10804.2 1165.47  -2
  -3   0  -4 10804.2 1165.47   1
  -3   0  -5 41624.1 749.142   1
   3   0  -4 57034.2 999.126  -2
  -3   0  -5 57034.2 999.126   1
  -3   0  -6 302.148 272.787   1
  -3   0   5 53285.3 749.228  -2
   3   0   6 53285.3 749.228   1
  -3   0  -7 209255. 2307.42   1
  -3   0   6 215687. 1622.79  -2
   3   0   7 215687. 1622.79   1
  -3   0  -8 1944.08 528.781   1
  -3   0   7 74646.6 1042.34  -2
   3   0   8 74646.6 1042.34   1
  -3   0  -9 13211.5 767.919   1
  -3   0 -10 1196.31 484.504   1
  -3   0 -11 13085.7 905.361   1
  -3   0 -12 15602.0 924.426   1
  -3   0 -13 2313.10 474.420   1
  -3   0 -14 5326.91 622.240   1
   3   0  15 111175. 4150.97   1
  -3   0 -16 90427.5 2151.23   1
  -3   0 -17 6494.36 776.461   1
  -3   0 -18 4929.58 632.055   1
   3   0  19 385.003 450.306   1
   3   0  20 55.0729 414.151   1
   3   0  21 4171.49 557.921   1
   3   0  22 3968.40 523.023   1
   3   0  23 17071.7 749.094   1
   3   0  24 2305.86 522.853   1
   3   0  25 78.1936 341.057   1
   3   0  26 47.2040 248.068   1
   3   0  27 32.6339 195.899   1
   3   1 -27 171.353 152.996   1
  -3  -1  26 7253.50 281.718   1
   3   1 -25 7167.54 317.202   1
   3   1 -24 317.703 224.436   1
   3   1 -23 31909.4 771.672   1
   3   1 -22 585.846 286.942   1
  -3  -1  21 18868.6 698.628   1
  -3  -1 -22 31352.0 860.045  -2
   3   1 -21 31352.0 860.045   1
   3   1 -20 3517.67 358.432   1
  -3  -1 -21 29553.2 2234.18  -2
   3   1 -20 29553.2 2234.18   1
   3   1  20 6356.60 637.825  -2
  -3  -1  19 6356.60 637.825   1
   3   1 -18 9190.70 2847.82   1
  -3  -1 -19 15004.1 806.623  -2
   3   1 -18 15004.1 806.623   1
  -3  -1  17 31843.4 2070.05   1
  -3  -1 -18 64133.2 1333.96  -2
   3   1 -17 64133.2 1333.96   1
  -3  -1  16 3184.93 983.545   1
  -3  -1 -17 4726.30 773.836  -2
   3   1 -16 4726.30 773.836   1
  -3  -1  15 59194.0 2264.10   1
  -3  -1 -16 80794.3 2237.14  -2
   3   1 -15 80794.3 2237.14   1
  -3  -1 -15 47680.8 4324.78  -2
   3   1 -14 47680.8 4324.78   1
  -3  -1  13 17681.3 1465.41   1
  -3  -1 -14 121661. 3166.73  -2
   3   1 -13 121661. 3166.73   1
  -3  -1  12-3.76009 686.476   1
  -3  -1 -13 4429.66 911.903  -2
   3   1 -12 4429.66 911.903   1
   3   1  12 8590.77 1000.48  -2
  -3  -1  11 8590.77 1000.48   1
   3   1  11 9895.47 946.322  -2
  -3  -1  10 9895.47 946.322   1
  -3  -1 -10 9057.44 958.203  -2
   3   1  -9 9057.44 958.203   1
   3   1   9 7421.12 865.695  -2
  -3  -1   8 7421.12 865.695   1
  -3  -1   7 26293.0 672.876   1
   3   1   8 33014.4 1259.47  -2
  -3  -1   7 33014.4 1259.47   1
  -3  -1   6 1050.08 292.236   1
   3   1   7 8366.65 793.231  -2
  -3  -1   6 8366.65 793.231   1
  -3  -1   5 390.983 309.800   1
   3   1   6 38769.5 3675.65  -2
  -3  -1   5 38769.5 3675.65   1
  -3  -1   4 371.518 326.510   1
   3   1   5 5441.31 564.136  -2
  -3  -1   4 5441.31 564.136   1
   3   1   4 56085.3 949.305  -2
  -3  -1   3 56085.3 949.305   1
  -3  -1   2 240775. 5406.52   1
  -3  -1  -3 278272. 10819.4  -2
   3   1  -2 278272. 10819.4   1
   3   1   2 185917. 1797.93  -2
  -3  -1   1 185917. 1797.93   1
   3   1   1 89168.3 1644.37  -2
  -3  -1   0 89168.3 1644.37   1
   3   1   1 78762.4 1547.62   1
   3   1   0 99745.0 1737.73  -2
  -3  -1  -1 99745.0 1737.73   1
  -3  -1  -2 219123. 1854.89   1
   3   1  -1 231062. 2234.57  -2
  -3  -1  -2 231062. 2234.57   1
  -3  -1  -3 19938.3 488.616   1
   3   1  -2 196663. 8535.26  -2
  -3  -1  -3 196663. 8535.26   1
  -3  -1  -4 120.073 232.538   1
   3   1  -3 41587.4 1595.27  -2
  -3  -1  -4 41587.4 1595.27   1
  -3  -1  -5 6839.95 517.557   1
   3   1  -4 7424.15 544.142  -2
  -3  -1  -5 7424.15 544.142   1
  -3  -1  -6 52360.0 868.919   1
   3   1  -5 53171.1 1103.78  -2
  -3  -1  -6 53171.1 1103.78   1
   3   1  -6 11040.3 710.459  -2
  -3  -1  -7 11040.3 710.459   1
  -3  -1  -8 10817.5 832.809   1
   3   1  -7 27040.5 1139.23  -2
  -3  -1  -8 27040.5 1139.23   1
  -3  -1  -9 7225.67 602.354   1
  -3  -1   8 8849.74 786.180  -2
   3   1   9 8849.74 786.180   1
  -3  -1 -10 440.356 506.394   1
   3   1  -9 8847.30 752.683  -2
  -3  -1 -10 8847.30 752.683   1
   3   1  11 7160.81 845.408   1
  -3  -1  10 10705.6 899.096  -2
   3   1  11 10705.6 899.096   1
   3   1  12 9267.61 1029.76   1
   3   1 -11 10844.7 1125.85  -2
  -3  -1 -12 10844.7 1125.85   1
   3   1  13 2232.25 842.952   1
   3   1 -12 2340.22 597.240  -2
  -3  -1 -13 2340.22 597.240   1
   3   1  14 161588. 3518.46   1
   3   1 -13 171065. 3236.75  -2
  -3  -1 -14 171065. 3236.75   1
   3   1 -14 34406.0 4383.36  -2
  -3  -1 -15 34406.0 4383.36   1
   3   1 -15 68295.0 7969.95  -2
  -3  -1 -16 68295.0 7969.95   1
  -3  -1 -17 3276.82 625.330   1
  -3  -1  16 5937.36 836.094  -2
   3   1  17 5937.36 836.094   1
  -3  -1  17 73528.1 1564.44  -2
   3   1  18 73528.1 1564.44   1
  -3  -1  18 13282.8 897.430  -2
   3   1  19 13282.8 897.430   1
  -3  -1  19 5314.54 520.351  -2
   3   1  20 5314.54 520.351   1
   3   1  21 33899.6 1014.04   1
  -3  -1  20 36589.3 1044.41  -2
   3   1  21 36589.3 1044.41   1
   3   1  22 14855.0 723.305   1
  -3  -1  21 31887.9 878.795  -2
   3   1  22 31887.9 878.795   1
   3   1  23 5593.85 525.611   1
  -3  -1  22 5618.63 546.987  -2
   3   1  23 5618.63 546.987   1
   3   1  24 2349.95 459.332   1
   3   1  25 10294.3 1613.53   1
   3   1  26 187.675 258.237   1
   3   1  27 249.793 205.121   1
   3   2 -26 228.192 96.4262   1
  -3  -2 -27 544.772 269.562  -2
   3   2 -26 544.772 269.562   1
   3   2  26 6517.56 366.389  -2
  -3  -2  25 6517.56 366.389   1
  -3  -2 -25 27945.0 666.337  -2
   3   2 -24 27945.0 666.337   1
  -3  -2 -24 1093.06 430.785  -2
   3   2 -23 1093.06 430.785   1
  -3  -2 -23 45685.8 1788.43  -2
   3   2 -22 45685.8 1788.43   1
   3   2  22 5711.54 635.452  -2
  -3  -2  21 5711.54 635.452   1
  -3  -2 -21 4112.26 579.815  -2
   3   2 -20 4112.26 579.815   1
  -3  -2 -20 3533.83 599.214  -2
   3   2 -19 3533.83 599.214   1
  -3  -2 -19 491.397 514.669  -2
   3   2 -18 491.397 514.669   1
  -3  -2 -18 5367.00 755.316  -2
   3   2 -17 5367.00 755.316   1
  -3  -2 -17 123205. 1799.20  -2
   3   2 -16 123205. 1799.20   1
   3   2  16 16283.7 2097.89  -2
  -3  -2  15 16283.7 2097.89   1
   3   2  15 58051.3 2159.01  -2
  -3  -2  14 58051.3 2159.01   1
   3   2  14 37314.4 1696.70  -2
  -3  -2  13 37314.4 1696.70   1
  -3  -2 -13 7977.28 1051.00  -2
   3   2 -12 7977.28 1051.00   1
   3   2  12 35452.9 4568.37  -2
  -3  -2  11 35452.9 4568.37   1
   3   2  11 38196.9 2658.41  -2
  -3  -2  10 38196.9 2658.41   1
   3   2  10 49326.9 8033.46  -2
  -3  -2   9 49326.9 8033.46   1
  -3  -2  -9 143627. 4188.49  -2
   3   2  -8 143627. 4188.49   1
  -3  -2  -8 106243. 1948.85  -2
   3   2  -7 106243. 1948.85   1
  -3  -2  -7 208341. 10957.2  -2
   3   2  -6 208341. 10957.2   1
  -3  -2  -6 99739.7 1890.78  -2
   3   2  -5 99739.7 1890.78   1
  -3  -2  -5 54537.3 2491.75  -2
   3   2  -4 54537.3 2491.75   1
  -3  -2  -4 2427.19 503.561  -2
   3   2  -3 2427.19 503.561   1
   3   2   3 28177.1 883.343  -2
  -3  -2   2 28177.1 883.343   1
   3   2   2 15369.8 589.118  -2
  -3  -2   1 15369.8 589.118   1
   3   2   1 262021. 1642.18  -2
  -3  -2   0 262021. 1642.18   1
   3   2   1 1736.22 857.376   1
  -3  -2   0 206631. 2314.95  -2
   3   2   1 206631. 2314.95   1
  -3  -2  -2 254.773 66.8354   1
   3   2  -1 12266.0 535.484  -2
  -3  -2  -2 12266.0 535.484   1
  -3  -2   2 22657.5 677.402  -2
   3   2   3 22657.5 677.402   1
   3   2  -3 1749.22 487.022  -2
  -3  -2  -4 1749.22 487.022   1
   3   2  -4 69292.1 1269.35  -2
  -3  -2  -5 69292.1 1269.35   1
   3   2  -5 77287.5 1293.25  -2
  -3  -2  -6 77287.5 1293.25   1
   3   2  -6 289467. 2767.75  -2
  -3  -2  -7 289467. 2767.75   1
   3   2  -7 99851.8 2378.03  -2
  -3  -2  -8 99851.8 2378.03   1
   3   2  -8 129618. 2564.88  -2
  -3  -2  -9 129618. 2564.88   1
   3   2  -9 33986.1 1524.32  -2
  -3  -2 -10 33986.1 1524.32   1
   3   2 -10 50121.5 1733.41  -2
  -3  -2 -11 50121.5 1733.41   1
   3   2 -11 23841.1 1322.98  -2
  -3  -2 -12 23841.1 1322.98   1
   3   2 -12 6616.06 864.128  -2
  -3  -2 -13 6616.06 864.128   1
   3   2 -13 28105.6 2989.34  -2
  -3  -2 -14 28105.6 2989.34   1
   3   2 -14 85128.9 3107.60  -2
  -3  -2 -15 85128.9 3107.60   1
   3   2 -15 22324.3 1859.62  -2
  -3  -2 -16 22324.3 1859.62   1
  -3  -2  16 97551.8 2345.49  -2
   3   2  17 97551.8 2345.49   1
  -3  -2  17 5423.42 695.425  -2
   3   2  18 5423.42 695.425   1
  -3  -2  18 625.098 484.623  -2
   3   2  19 625.098 484.623   1
  -3  -2  19 2902.78 504.659  -2
   3   2  20 2902.78 504.659   1
  -3  -2  20 5078.30 634.309  -2
   3   2  21 5078.30 634.309   1
  -3  -2  21 5536.24 517.553  -2
   3   2  22 5536.24 517.553   1
  -3  -2  22 57505.9 1383.69  -2
   3   2  23 57505.9 1383.69   1
  -3  -2  23 386.390 195.363  -2
   3   2  24 386.390 195.363   1
  -3  -2  24 20971.6 2535.31  -2
   3   2  25 20971.6 2535.31   1
  -3  -2  25 4233.30 924.806  -2
   3   2  26 4233.30 924.806   1
  -3  -2  26 468.668 261.238  -2
   3   2  27 468.668 261.238   1
   3   3  27 11772.2 2353.24  -2
  -3  -3  26 11772.2 2353.24   1
   3   3  26 17815.4 569.681  -2
  -3  -3  25 17815.4 569.681   1
  -3  -3 -25 794.221 370.510  -2
   3   3 -24 794.221 370.510   1
  -3  -3 -24 32666.9 3197.88  -2
   3   3 -23 32666.9 3197.88   1
  -3  -3 -23 14550.5 2210.68  -2
   3   3 -22 14550.5 2210.68   1
  -3  -3 -22 15667.0 3251.68  -2
   3   3 -21 15667.0 3251.68   1
  -3  -3 -21 4360.73 1003.37  -2
   3   3 -20 4360.73 1003.37   1
  -3  -3 -20 5232.36 735.638  -2
   3   3 -19 5232.36 735.638   1
  -3  -3 -19-388.948 516.460  -2
   3   3 -18-388.948 516.460   1
   3   3  18 26663.5 3490.86  -2
  -3  -3  17 26663.5 3490.86   1
  -3  -3 -17 8693.85 1157.26  -2
   3   3 -16 8693.85 1157.26   1
  -3  -3 -16 40349.4 5698.82  -2
   3   3 -15 40349.4 5698.82   1
   3   3  15 4064.46 975.772  -2
  -3  -3  14 4064.46 975.772   1
  -3  -3 -14 114093. 20135.7  -2
   3   3 -13 114093. 20135.7   1
   3   3  13 36920.9 6670.97  -2
  -3  -3  12 36920.9 6670.97   1
   3   3  12 34619.8 9605.08  -2
  -3  -3  11 34619.8 9605.08   1
   3   3  11 51110.9 18232.4  -2
  -3  -3  10 51110.9 18232.4   1
   3   3  10 100706. 21752.0  -2
  -3  -3   9 100706. 21752.0   1
   3   3   9 58160.6 1900.94  -2
  -3  -3   8 58160.6 1900.94   1
   3   3   8 270336. 13023.1  -2
  -3  -3   7 270336. 13023.1   1
  -3  -3  -7 53605.1 1761.01  -2
   3   3  -6 53605.1 1761.01   1
   3   3   6 5468.88 714.236  -2
  -3  -3   5 5468.88 714.236   1
   3   3   5 37673.4 1518.78  -2
  -3  -3   4 37673.4 1518.78   1
   3   3   4 39425.2 1264.27  -2
  -3  -3   3 39425.2 1264.27   1
   3   3   3 126256. 1891.22  -2
  -3  -3   2 126256. 1891.22   1
   3   3   2 169201. 2093.99  -2
  -3  -3   1 169201. 2093.99   1
  -3  -3  -1 108516. 1929.50  -2
   3   3   0 108516. 1929.50   1
   3   3   0 142458. 1832.51  -2
  -3  -3  -1 142458. 1832.51   1
   3   3  -1 181302. 1717.70  -2
  -3  -3  -2 181302. 1717.70   1
   3   3  -2 106635. 2042.93  -2
  -3  -3  -3 106635. 2042.93   1
   3   3  -3 30356.3 1103.94  -2
  -3  -3  -4 30356.3 1103.94   1
   3   3  -4 38399.8 1162.49  -2
  -3  -3  -5 38399.8 1162.49   1
  -3  -3   5 3971.28 603.994  -2
   3   3   6 3971.28 603.994   1
   3   3  -6 51899.8 1477.67  -2
  -3  -3  -7 51899.8 1477.67   1
   3   3  -7 198314. 3283.43  -2
  -3  -3  -8 198314. 3283.43   1
  -3  -3   8 79906.2 2077.41  -2
   3   3   9 79906.2 2077.41   1
   3   3  -9 82011.5 2365.16  -2
  -3  -3 -10 82011.5 2365.16   1
   3   3 -10 36651.9 1697.26  -2
  -3  -3 -11 36651.9 1697.26   1
   3   3 -11 24607.0 1543.68  -2
  -3  -3 -12 24607.0 1543.68   1
   3   3 -12 43390.7 2170.20  -2
  -3  -3 -13 43390.7 2170.20   1
   3   3 -13 131502. 3754.42  -2
  -3  -3 -14 131502. 3754.42   1
   3   3 -14 884.928 384.912  -2
  -3  -3 -15 884.928 384.912   1
   3   3 -15 37279.8 10824.7  -2
  -3  -3 -16 37279.8 10824.7   1
   3   3 -16 11190.6 1531.93  -2
  -3  -3 -17 11190.6 1531.93   1
   3   3 -17 38470.1 2139.93  -2
  -3  -3 -18 38470.1 2139.93   1
  -3  -3  18 253.312 486.646  -2
   3   3  19 253.312 486.646   1
  -3  -3  19 6613.33 730.384  -2
   3   3  20 6613.33 730.384   1
  -3  -3  20 4974.12 636.665  -2
   3   3  21 4974.12 636.665   1
  -3  -3  21 19615.9 790.364  -2
   3   3  22 19615.9 790.364   1
  -3  -3  22 13797.7 761.423  -2
   3   3  23 13797.7 761.423   1
  -3  -3  23 30610.2 1637.57  -2
   3   3  24 30610.2 1637.57   1
  -3  -3  24 596.624 355.645  -2
   3   3  25 596.624 355.645   1
  -3  -3  25 15163.1 3660.52  -2
   3   3  26 15163.1 3660.52   1
  -3  -3  26 13658.3 497.195  -2
   3   3  27 13658.3 497.195   1
  -3  -4 -27 1742.28 364.752  -2
   3   4 -26 1742.28 364.752   1
   3   4  26 8643.33 3057.74  -2
  -3  -4  25 8643.33 3057.74   1
   3   4  25 7549.43 8419.36  -2
  -3  -4  24 7549.43 8419.36   1
  -3  -4 -24 19438.2 25771.8  -2
   3   4 -23 19438.2 25771.8   1
  -3  -4 -23 47852.1 112336.  -2
   3   4 -22 47852.1 112336.   1
  -3  -4 -22 1059.39 2410.04  -2
   3   4 -21 1059.39 2410.04   1
  -3  -4 -21 696.412 7065.79  -2
   3   4 -20 696.412 7065.79   1
  -3  -4 -20-494.560 3526.87  -2
   3   4 -19-494.560 3526.87   1
  -3  -4 -19 1370.22 6077.86  -2
   3   4 -18 1370.22 6077.86   1
   3   4  18 17925.0 4107.02  -2
  -3  -4  17 17925.0 4107.02   1
  -3  -4 -17 50497.2 4388.90  -2
   3   4 -16 50497.2 4388.90   1
  -3  -4 -16 23480.2 3466.98  -2
   3   4 -15 23480.2 3466.98   1
   3   4  15 11918.1 1426.05  -2
  -3  -4  14 11918.1 1426.05   1
   3   4  14 12688.1 9418.99  -2
  -3  -4  13 12688.1 9418.99   1
   3   4  13 22670.8 6041.64  -2
  -3  -4  12 22670.8 6041.64   1
   3   4  12 29457.2 12693.9  -2
  -3  -4  11 29457.2 12693.9   1
  -3  -4 -11 39408.7 14966.5  -2
   3   4 -10 39408.7 14966.5   1
  -3  -4 -10 9803.22 4206.08  -2
   3   4  -9 9803.22 4206.08   1
   3   4   9 133425. 21893.5  -2
  -3  -4   8 133425. 21893.5   1
  -3  -4  -8 110610. 2622.64  -2
   3   4  -7 110610. 2622.64   1
   3   4   7 142471. 14191.9  -2
  -3  -4   6 142471. 14191.9   1
   3   4   6 48889.7 5025.13  -2
  -3  -4   5 48889.7 5025.13   1
   3   4   5 106202. 2363.61  -2
  -3  -4   4 106202. 2363.61   1
   3   4   4 24483.4 1200.15  -2
  -3  -4   3 24483.4 1200.15   1
   3   4   3 37532.6 1918.28  -2
  -3  -4   2 37532.6 1918.28   1
  -3  -4  -2 6309.71 683.956  -2
   3   4  -1 6309.71 683.956   1
   3   4   1 101227. 2092.80  -2
  -3  -4   0 101227. 2092.80   1
   3   4   0 87769.6 1951.45  -2
  -3  -4  -1 87769.6 1951.45   1
   3   4  -1 5341.91 552.316  -2
  -3  -4  -2 5341.91 552.316   1
   3   4  -2 43586.5 1260.78  -2
  -3  -4  -3 43586.5 1260.78   1
   3   4  -3 29732.6 985.290  -2
  -3  -4  -4 29732.6 985.290   1
  -3  -4   4 118651. 2615.30  -2
   3   4   5 118651. 2615.30   1
   3   4  -5 57269.7 1969.03  -2
  -3  -4  -6 57269.7 1969.03   1
   3   4  -6 189663. 3518.96  -2
  -3  -4  -7 189663. 3518.96   1
   3   4  -7 133468. 2692.62  -2
  -3  -4  -8 133468. 2692.62   1
  -3  -4   8 134261. 3550.41  -2
   3   4   9 134261. 3550.41   1
  -3  -4   9 7333.18 914.903  -2
   3   4  10 7333.18 914.903   1
   3   4 -10 48431.1 1781.59  -2
  -3  -4 -11 48431.1 1781.59   1
   3   4 -11 34178.0 2133.35  -2
  -3  -4 -12 34178.0 2133.35   1
   3   4 -12 12044.6 1623.86  -2
  -3  -4 -13 12044.6 1623.86   1
   3   4 -13 12731.2 1653.87  -2
  -3  -4 -14 12731.2 1653.87   1
   3   4 -14 13916.8 3885.29  -2
  -3  -4 -15 13916.8 3885.29   1
  -3  -4  15 47005.5 1855.91  -2
   3   4  16 47005.5 1855.91   1
   3   4 -16 37819.2 2697.23  -2
  -3  -4 -17 37819.2 2697.23   1
  -3  -4  17 46332.3 6529.45  -2
   3   4  18 46332.3 6529.45   1
  -3  -4  18 17392.7 1645.16  -2
   3   4  19 17392.7 1645.16   1
  -3  -4  19 5272.14 679.527  -2
   3   4  20 5272.14 679.527   1
  -3  -4  20 8524.52 255.028  -2
   3   4  21 8524.52 255.028   1
   3   4 -21 10837.3 793.505  -2
  -3  -4 -22 10837.3 793.505   1
  -3  -4  22 69029.2 1268.17  -2
   3   4  23 69029.2 1268.17   1
   3   4 -23 15452.5 712.924  -2
  -3  -4 -24 15452.5 712.924   1
  -3  -4  24 6732.21 937.074  -2
   3   4  25 6732.21 937.074   1
  -3  -4  25 15474.3 813.370  -2
   3   4  26 15474.3 813.370   1
  -3  -4  26 2723.67 310.151  -2
   3   4  27 2723.67 310.151   1
  -3  -5 -26 9044.38 469.322  -2
   3   5 -25 9044.38 469.322   1
   3   5  25 11359.3 1339.31  -2
  -3  -5  24 11359.3 1339.31   1
   3   5  24 6618.34 1554.22  -2
  -3  -5  23 6618.34 1554.22   1
   3   5  23 31090.8 3592.11  -2
  -3  -5  22 31090.8 3592.11   1
  -3  -5 -22 6662.81 1243.48  -2
   3   5 -21 6662.81 1243.48   1
  -3  -5 -21 19206.4 4133.04  -2
   3   5 -20 19206.4 4133.04   1
  -3  -5 -20 4127.70 599.358  -2
   3   5 -19 4127.70 599.358   1
  -3  -5 -19 18518.0 3348.36  -2
   3   5 -18 18518.0 3348.36   1
  -3  -5 -18 11639.5 6592.55  -2
   3   5 -17 11639.5 6592.55   1
  -3  -5 -17 7257.05 967.307  -2
   3   5 -16 7257.05 967.307   1
  -3  -5 -16 6421.64 921.836  -2
   3   5 -15 6421.64 921.836   1
  -3  -5 -15 17966.3 2812.71  -2
   3   5 -14 17966.3 2812.71   1
   3   5  14 54080.4 46026.3  -2
  -3  -5  13 54080.4 46026.3   1
  -3  -5 -13 14143.6 10034.8  -2
   3   5 -12 14143.6 10034.8   1
   3   5  12 42193.0 2553.37  -2
  -3  -5  11 42193.0 2553.37   1
   3   5  11 67730.5 17714.5  -2
  -3  -5  10 67730.5 17714.5   1
   3   5  10 115056. 33931.0  -2
  -3  -5   9 115056. 33931.0   1
  -3  -5  -9 148020. 3541.27  -2
   3   5  -8 148020. 3541.27   1
   3   5   8 135813. 3498.68  -2
  -3  -5   7 135813. 3498.68   1
   3   5   7 126742. 2944.75  -2
  -3  -5   6 126742. 2944.75   1
   3   5   6 10753.7 1055.28  -2
  -3  -5   5 10753.7 1055.28   1
   3   5   5 86561.1 3462.46  -2
  -3  -5   4 86561.1 3462.46   1
   3   5   4 17589.8 1395.91  -2
  -3  -5   3 17589.8 1395.91   1
   3   5   3 1782.83 178.963  -2
  -3  -5   2 1782.83 178.963   1
   3   5   2 3378.17 330.410  -2
  -3  -5   1 3378.17 330.410   1
   3   5   1 20809.7 756.454  -2
  -3  -5   0 20809.7 756.454   1
   3   5   0 29835.7 585.830  -2
  -3  -5  -1 29835.7 585.830   1
   3   5  -1 4831.17 537.390  -2
  -3  -5  -2 4831.17 537.390   1
   3   5  -2 2451.49 511.242  -2
  -3  -5  -3 2451.49 511.242   1
  -3  -5   3 18512.5 954.574  -2
   3   5   4 18512.5 954.574   1
  -3  -5   4 102325. 2291.57  -2
   3   5   5 102325. 2291.57   1
   3   5  -5 10350.0 1024.01  -2
  -3  -5  -6 10350.0 1024.01   1
   3   5  -6 132450. 2699.77  -2
  -3  -5  -7 132450. 2699.77   1
   3   5  -7 105231. 4724.67  -2
  -3  -5  -8 105231. 4724.67   1
   3   5  -8 215004. 3708.80  -2
  -3  -5  -9 215004. 3708.80   1
   3   5  -9 81617.7 2609.44  -2
  -3  -5 -10 81617.7 2609.44   1
   3   5 -10 52297.1 2522.46  -2
  -3  -5 -11 52297.1 2522.46   1
   3   5 -11 26726.8 1902.38  -2
  -3  -5 -12 26726.8 1902.38   1
   3   5 -12 16626.6 1796.71  -2
  -3  -5 -13 16626.6 1796.71   1
  -3  -5  13 87938.5 11926.7  -2
   3   5  14 87938.5 11926.7   1
  -3  -5  14 32960.0 2390.54  -2
   3   5  15 32960.0 2390.54   1
   3   5 -15 7791.29 982.407  -2
  -3  -5 -16 7791.29 982.407   1
  -3  -5  16 13071.1 1046.52  -2
   3   5  17 13071.1 1046.52   1
   3   5 -17 12894.0 934.231  -2
  -3  -5 -18 12894.0 934.231   1
   3   5 -18 18417.6 3052.57  -2
  -3  -5 -19 18417.6 3052.57   1
  -3  -5  19 3406.57 699.310  -2
   3   5  20 3406.57 699.310   1
  -3  -5  20 18022.0 975.516  -2
   3   5  21 18022.0 975.516   1
  -3  -5  21 5737.27 696.066  -2
   3   5  22 5737.27 696.066   1
   3   5 -22 22216.9 1082.90  -2
  -3  -5 -23 22216.9 1082.90   1
   3   5 -23 6433.77 1005.65  -2
  -3  -5 -24 6433.77 1005.65   1
  -3  -5  24 9123.02 470.041  -2
   3   5  25 9123.02 470.041   1
  -3  -5  25 7056.41 547.243  -2
   3   5  26 7056.41 547.243   1
  -3  -6 -26 9735.95 333.141  -2
   3   6 -25 9735.95 333.141   1
   3   6  25 10603.1 417.753  -2
  -3  -6  24 10603.1 417.753   1
   3   6  24 32139.6 730.468  -2
  -3  -6  23 32139.6 730.468   1
   3   6  23 22100.0 692.019  -2
  -3  -6  22 22100.0 692.019   1
   3   6  22 19603.7 778.465  -2
  -3  -6  21 19603.7 778.465   1
   3   6  21 8627.69 624.724  -2
  -3  -6  20 8627.69 624.724   1
   3   6  20 1578.99 450.902  -2
  -3  -6  19 1578.99 450.902   1
  -3  -6 -19 2434.13 557.530  -2
   3   6 -18 2434.13 557.530   1
  -3  -6 -18 35142.1 1270.85  -2
   3   6 -17 35142.1 1270.85   1
  -3  -6 -17 12065.8 900.243  -2
   3   6 -16 12065.8 900.243   1
  -3  -6 -16 94424.3 2319.41  -2
   3   6 -15 94424.3 2319.41   1
  -3  -6 -15 2993.50 691.343  -2
   3   6 -14 2993.50 691.343   1
  -3  -6 -14 12079.6 1590.85  -2
   3   6 -13 12079.6 1590.85   1
  -3  -6 -13 22655.9 2107.05  -2
   3   6 -12 22655.9 2107.05   1
  -3  -6 -12 31839.7 11576.5  -2
   3   6 -11 31839.7 11576.5   1
   3   6  11 191.977 303.622  -2
  -3  -6  10 191.977 303.622   1
   3   6  10 68795.7 2662.82  -2
  -3  -6   9 68795.7 2662.82   1
  -3  -6  -9 13706.6 1546.64  -2
   3   6  -8 13706.6 1546.64   1
  -3  -6  -8 52007.0 2332.03  -2
   3   6  -7 52007.0 2332.03   1
   3   6   7 741.470 641.300  -2
  -3  -6   6 741.470 641.300   1
  -3  -6  -6 41962.5 1811.27  -2
   3   6  -5 41962.5 1811.27   1
   3   6   5 44467.2 2228.84  -2
  -3  -6   4 44467.2 2228.84   1
   3   6   4 20634.2 1268.37  -2
  -3  -6   3 20634.2 1268.37   1
  -3  -6  -3 117.130 437.839  -2
   3   6  -2 117.130 437.839   1
  -3  -6  -2 141614. 3197.86  -2
   3   6  -1 141614. 3197.86   1
  -3  -6  -1 278181. 3160.83  -2
   3   6   0 278181. 3160.83   1
   3   6   0 232039. 3634.97  -2
  -3  -6  -1 232039. 3634.97   1
   3   6  -1 115811. 2614.88  -2
  -3  -6  -2 115811. 2614.88   1
   3   6  -2 231.357 365.456  -2
  -3  -6  -3 231.357 365.456   1
   3   6  -3 20481.8 1207.84  -2
  -3  -6  -4 20481.8 1207.84   1
   3   6  -4 32389.7 1584.53  -2
  -3  -6  -5 32389.7 1584.53   1
   3   6  -5 43344.3 1821.49  -2
  -3  -6  -6 43344.3 1821.49   1
   3   6  -6 143.657 308.689  -2
  -3  -6  -7 143.657 308.689   1
   3   6  -7 58260.6 2033.41  -2
  -3  -6  -8 58260.6 2033.41   1
   3   6  -8 11746.8 1101.94  -2
  -3  -6  -9 11746.8 1101.94   1
   3   6  -9 57540.1 2631.75  -2
  -3  -6 -10 57540.1 2631.75   1
   3   6 -10 709.399 499.723  -2
  -3  -6 -11 709.399 499.723   1
   3   6 -11 35119.8 2038.27  -2
  -3  -6 -12 35119.8 2038.27   1
   3   6 -12 21100.1 2079.76  -2
  -3  -6 -13 21100.1 2079.76   1
   3   6 -13 16876.3 1048.97  -2
  -3  -6 -14 16876.3 1048.97   1
  -3  -6  14 2148.37 828.715  -2
   3   6  15 2148.37 828.715   1
   3   6 -15 116573. 5407.48  -2
  -3  -6 -16 116573. 5407.48   1
  -3  -6  16 9454.51 996.310  -2
   3   6  17 9454.51 996.310   1
  -3  -6  17 27327.0 1421.88  -2
   3   6  18 27327.0 1421.88   1
   3   6 -18 2916.30 691.869  -2
  -3  -6 -19 2916.30 691.869   1
  -3  -6  19 1191.84 784.466  -2
   3   6  20 1191.84 784.466   1
  -3  -6  20 6672.14 714.941  -2
   3   6  21 6672.14 714.941   1
   3   6 -21 19572.6 949.965  -2
  -3  -6 -22 19572.6 949.965   1
   3   6 -22 24424.0 763.131  -2
  -3  -6 -23 24424.0 763.131   1
   3   6 -23 29169.9 834.395  -2
  -3  -6 -24 29169.9 834.395   1
   3   6 -24 10607.9 469.329  -2
  -3  -6 -25 10607.9 469.329   1
  -3  -6  25 9839.02 366.996  -2
   3   6  26 9839.02 366.996   1
  -3  -7  24 467.306 220.305   1
  -3  -7  23 2940.18 226.381   1
   3   7  24 3275.86 284.081  -2
  -3  -7  23 3275.86 284.081   1
   3   7  23 13357.2 512.070  -2
  -3  -7  22 13357.2 512.070   1
   3   7  22 658.691 374.607  -2
  -3  -7  21 658.691 374.607   1
   3   7  21 44462.2 875.122  -2
  -3  -7  20 44462.2 875.122   1
   3   7  20 6989.14 573.416  -2
  -3  -7  19 6989.14 573.416   1
   3   7  19 64664.7 1363.11  -2
  -3  -7  18 64664.7 1363.11   1
  -3  -7 -18 5150.49 621.190  -2
   3   7 -17 5150.49 621.190   1
  -3  -7 -17 25486.6 1415.89  -2
   3   7 -16 25486.6 1415.89   1
   3   7  16 2180.36 571.048  -2
  -3  -7  15 2180.36 571.048   1
  -3  -7 -15 64906.3 1503.37  -2
   3   7 -14 64906.3 1503.37   1
   3   7  14 2117.45 563.252  -2
  -3  -7  13 2117.45 563.252   1
   3   7  13 16434.1 914.125  -2
  -3  -7  12 16434.1 914.125   1
  -3  -7 -12 5450.94 1543.76  -2
   3   7 -11 5450.94 1543.76   1
   3   7  11 23522.8 2703.44  -2
  -3  -7  10 23522.8 2703.44   1
   3   7  10 24121.8 1642.02  -2
  -3  -7   9 24121.8 1642.02   1
   3   7   9 80591.9 2557.38  -2
  -3  -7   8 80591.9 2557.38   1
  -3  -7  -8 23899.5 1550.37  -2
   3   7  -7 23899.5 1550.37   1
  -3  -7  -7 69323.9 2376.82  -2
   3   7  -6 69323.9 2376.82   1
   3   7   6 31523.9 1586.21  -2
  -3  -7   5 31523.9 1586.21   1
   3   7   5 52233.2 1880.74  -2
  -3  -7   4 52233.2 1880.74   1
   3   7   4 8379.84 813.748  -2
  -3  -7   3 8379.84 813.748   1
   3   7   3 120063. 2412.53  -2
  -3  -7   2 120063. 2412.53   1
   3   7   2 54367.9 1718.48  -2
  -3  -7   1 54367.9 1718.48   1
   3   7   1 46291.9 2053.45  -2
  -3  -7   0 46291.9 2053.45   1
   3   7   0 58890.9 1814.67  -2
  -3  -7  -1 58890.9 1814.67   1
   3   7  -1 57009.7 1746.89  -2
  -3  -7  -2 57009.7 1746.89   1
  -3  -7   2 91373.9 2401.27  -2
   3   7   3 91373.9 2401.27   1
   3   7  -3 10939.2 969.966  -2
  -3  -7  -4 10939.2 969.966   1
   3   7  -4 72063.1 2603.77  -2
  -3  -7  -5 72063.1 2603.77   1
   3   7  -5 34599.6 1580.92  -2
  -3  -7  -6 34599.6 1580.92   1
   3   7  -6 73251.7 2277.39  -2
  -3  -7  -7 73251.7 2277.39   1
  -3  -7   7 22306.2 1263.01  -2
   3   7   8 22306.2 1263.01   1
   3   7  -8 107355. 3309.37  -2
  -3  -7  -9 107355. 3309.37   1
   3   7  -9 17299.5 1589.65  -2
  -3  -7 -10 17299.5 1589.65   1
  -3  -7  10 24927.1 2501.09  -2
   3   7  11 24927.1 2501.09   1
   3   7 -11 3500.73 1069.18  -2
  -3  -7 -12 3500.73 1069.18   1
   3   7 -12 21091.7 948.019  -2
  -3  -7 -13 21091.7 948.019   1
   3   7 -13 1670.41 809.755  -2
  -3  -7 -14 1670.41 809.755   1
   3   7 -14 52705.6 1651.74  -2
  -3  -7 -15 52705.6 1651.74   1
  -3  -7  15 1767.57 692.873  -2
   3   7  16 1767.57 692.873   1
   3   7 -16 28815.2 1162.41  -2
  -3  -7 -17 28815.2 1162.41   1
  -3  -7  17 3401.38 712.993  -2
   3   7  18 3401.38 712.993   1
  -3  -7  18 52571.2 1429.69  -2
   3   7  19 52571.2 1429.69   1
  -3  -7  19 6325.88 657.790  -2
   3   7  20 6325.88 657.790   1
  -3  -7  20 54016.0 2185.35  -2
   3   7  21 54016.0 2185.35   1
  -3  -7  21 1124.34 519.971  -2
   3   7  22 1124.34 519.971   1
   3   7 -22 14130.0 652.703  -2
  -3  -7 -23 14130.0 652.703   1
  -3  -7 -24 727.418 161.236   1
   3   7 -23 3376.73 412.445  -2
  -3  -7 -24 3376.73 412.445   1
  -3  -7 -25 12698.4 318.368   1
  -3  -8  23 19387.5 464.925   1
  -3  -8  22 236.576 247.166   1
  -3  -8  21 9557.51 353.947   1
   3   8 -20 2104.73 271.415   1
   3   8  21 2733.72 381.937  -2
  -3  -8  20 2733.72 381.937   1
   3   8 -19 1352.70 215.225   1
   3   8  20 735.546 402.782  -2
  -3  -8  19 735.546 402.782   1
  -3  -8 -19 2333.20 474.144  -2
   3   8 -18 2333.20 474.144   1
   3   8  18 26589.1 886.847  -2
  -3  -8  17 26589.1 886.847   1
   3   8  17 6704.81 664.818  -2
  -3  -8  16 6704.81 664.818   1
  -3  -8 -16 100833. 1679.24  -2
   3   8 -15 100833. 1679.24   1
   3   8  15 16166.9 837.582  -2
  -3  -8  14 16166.9 837.582   1
   3   8  14 7970.15 673.295  -2
  -3  -8  13 7970.15 673.295   1
   3   8  13 609.984 512.885  -2
  -3  -8  12 609.984 512.885   1
  -3  -8 -12 25828.9 1264.12  -2
   3   8 -11 25828.9 1264.12   1
   3   8  11 2995.79 703.798  -2
  -3  -8  10 2995.79 703.798   1
  -3  -8 -10 44824.5 1994.25  -2
   3   8  -9 44824.5 1994.25   1
  -3  -8  -9 21190.2 1446.24  -2
   3   8  -8 21190.2 1446.24   1
   3   8   8 44011.0 1842.74  -2
  -3  -8   7 44011.0 1842.74   1
   3   8   7 42266.5 1766.69  -2
  -3  -8   6 42266.5 1766.69   1
   3   8   6 26879.3 1435.37  -2
  -3  -8   5 26879.3 1435.37   1
   3   8   5 22629.9 1704.86  -2
  -3  -8   4 22629.9 1704.86   1
   3   8   4 5032.31 888.555  -2
  -3  -8   3 5032.31 888.555   1
   3   8   3 1326.05 558.866  -2
  -3  -8   2 1326.05 558.866   1
   3   8   2 135456. 2933.04  -2
  -3  -8   1 135456. 2933.04   1
   3   8   1 96621.2 2111.45  -2
  -3  -8   0 96621.2 2111.45   1
   3   8   0 73344.5 1901.27  -2
  -3  -8  -1 73344.5 1901.27   1
  -3  -8   1 105112. 2789.55  -2
   3   8   2 105112. 2789.55   1
  -3  -8   2 1742.27 680.819  -2
   3   8   3 1742.27 680.819   1
   3   8  -3 6641.53 815.681  -2
  -3  -8  -4 6641.53 815.681   1
   3   8  -4 24873.3 1360.38  -2
  -3  -8  -5 24873.3 1360.38   1
  -3  -8   5 19690.0 1219.71  -2
   3   8   6 19690.0 1219.71   1
   3   8   7 53666.2 1359.98   1
  -3  -8   6 55930.3 2057.85  -2
   3   8   7 55930.3 2057.85   1
  -3  -8   7 34170.5 1938.40  -2
   3   8   8 34170.5 1938.40   1
   3   8  -8 14264.6 1962.39  -2
  -3  -8  -9 14264.6 1962.39   1
  -3  -8 -10 2712.68 836.518   1
  -3  -8   9 37564.5 2437.46  -2
   3   8  10 37564.5 2437.46   1
   3   8 -10 1585.05 488.548  -2
  -3  -8 -11 1585.05 488.548   1
  -3  -8  11 23895.8 1010.61  -2
   3   8  12 23895.8 1010.61   1
  -3  -8 -13 998.773 1255.06   1
   3   8 -12 1053.96 607.777  -2
  -3  -8 -13 1053.96 607.777   1
   3   8 -13 10620.9 815.671  -2
  -3  -8 -14 10620.9 815.671   1
   3   8 -14 22219.5 1088.24  -2
  -3  -8 -15 22219.5 1088.24   1
   3   8 -15 142877. 2162.49  -2
  -3  -8 -16 142877. 2162.49   1
   3   8 -16 5914.00 756.074  -2
  -3  -8 -17 5914.00 756.074   1
   3   8 -17 23933.2 924.917  -2
  -3  -8 -18 23933.2 924.917   1
  -3  -8 -19 989.436 384.963   1
  -3  -8  18 2437.37 642.060  -2
   3   8  19 2437.37 642.060   1
   3   8  20-34.2974 502.489   1
   3   8 -19 867.599 653.841  -2
  -3  -8 -20 867.599 653.841   1
   3   8  21 234.025 320.151   1
  -3  -8  20 1845.06 393.164  -2
   3   8  21 1845.06 393.164   1
   3   8  22 6650.22 613.725   1
  -3  -8 -23 201.177 221.209   1
  -3  -8 -24 2044.47 266.569   1
  -3  -9  22 729.125 229.513   1
   3   9 -21 5723.51 279.275   1
   3   9 -20 3092.55 302.681   1
  -3  -9  19 3385.56 342.013   1
   3   9 -18 35684.6 1387.71   1
   3   9 -17 5324.11 429.115   1
   3   9 -16 475.228 369.326   1
   3   9  17 11899.4 588.685  -2
  -3  -9  16 11899.4 588.685   1
   3   9 -15 26668.8 702.424   1
   3   9  16 36097.8 1021.72  -2
  -3  -9  15 36097.8 1021.72   1
   3   9  15 47350.2 1185.99  -2
  -3  -9  14 47350.2 1185.99   1
   3   9  14 54892.6 1164.39  -2
  -3  -9  13 54892.6 1164.39   1
   3   9  13 1567.77 543.725  -2
  -3  -9  12 1567.77 543.725   1
   3   9  12 1228.65 563.095  -2
  -3  -9  11 1228.65 563.095   1
   3   9  11 3273.46 904.796  -2
  -3  -9  10 3273.46 904.796   1
   3   9  10 7063.60 910.894  -2
  -3  -9   9 7063.60 910.894   1
   3   9   9 18350.5 1058.29  -2
  -3  -9   8 18350.5 1058.29   1
   3   9   8 6160.52 797.209  -2
  -3  -9   7 6160.52 797.209   1
   3   9   7 27486.1 1510.15  -2
  -3  -9   6 27486.1 1510.15   1
   3   9   6 33226.4 1477.57  -2
  -3  -9   5 33226.4 1477.57   1
   3   9   5 21443.9 1550.64  -2
  -3  -9   4 21443.9 1550.64   1
   3   9   4 15938.6 1272.96  -2
  -3  -9   3 15938.6 1272.96   1
   3   9   3 177473. 3448.56  -2
  -3  -9   2 177473. 3448.56   1
   3   9   2 68920.7 2710.14  -2
  -3  -9   1 68920.7 2710.14   1
  -3  -9  -1 17336.3 1213.87  -2
   3   9   0 17336.3 1213.87   1
  -3  -9   0 12476.7 1070.83  -2
   3   9   1 12476.7 1070.83   1
   3   9   2 90924.3 2092.06   1
   3   9  -1 101728. 2616.35  -2
  -3  -9  -2 101728. 2616.35   1
   3   9   3 15708.5 948.913   1
   3   9  -2 141412. 3076.55  -2
  -3  -9  -3 141412. 3076.55   1
   3   9   4-207.521 435.849   1
   3   9  -3 12896.5 1211.89  -2
  -3  -9  -4 12896.5 1211.89   1
   3   9   5 28891.4 1086.04   1
   3   9  -4 29334.8 1564.65  -2
  -3  -9  -5 29334.8 1564.65   1
   3   9  -5 44391.3 1874.31  -2
  -3  -9  -6 44391.3 1874.31   1
  -3  -9  -7 9209.13 1018.96   1
   3   9  -6 22938.6 1799.32  -2
  -3  -9  -7 22938.6 1799.32   1
  -3  -9  -8 5833.80 873.240   1
   3   9  -7 7728.70 834.383  -2
  -3  -9  -8 7728.70 834.383   1
  -3  -9  -9 12582.2 1071.44   1
   3   9  -8 17414.1 880.209  -2
  -3  -9  -9 17414.1 880.209   1
   3   9  -9 5836.60 693.880  -2
  -3  -9 -10 5836.60 693.880   1
  -3  -9 -11 25.5482 1301.48   1
   3   9 -10 2654.66 637.080  -2
  -3  -9 -11 2654.66 637.080   1
   3   9 -11 2055.45 717.550  -2
  -3  -9 -12 2055.45 717.550   1
   3   9 -12 2020.88 583.573  -2
  -3  -9 -13 2020.88 583.573   1
   3   9 -13 68474.8 1536.84  -2
  -3  -9 -14 68474.8 1536.84   1
   3   9  15 1121.71 433.960   1
   3   9 -14 41218.7 1561.88  -2
  -3  -9 -15 41218.7 1561.88   1
  -3  -9 -16 11098.5 737.652   1
   3   9 -15 34677.1 1367.82  -2
  -3  -9 -16 34677.1 1367.82   1
   3   9  17 15962.1 733.922   1
  -3  -9 -18 2029.07 397.043   1
   3   9  19 2908.74 459.115   1
   3   9  20 408.028 340.097   1
   3   9  21 46195.7 1222.42   1
  -3  -9 -22 1015.84 255.119   1
   3   9  23 7695.72 391.101   1
  -3  -9 -24 361.000 135.957   1
   3  10 -21 4365.69 346.422   1
   3  10 -20 197.393 182.903   1
  -3 -10  19 2409.32 277.693   1
  -3 -10  18 2350.44 314.312   1
  -3 -10  17 450.440 296.429   1
  -3 -10  16 42012.8 1029.05   1
   3  10 -15 603.903 349.620   1
  -3 -10  14 500.098 371.423   1
   3  10 -13 375.781 295.542   1
   3  10  14 814.907 475.156  -2
  -3 -10  13 814.907 475.156   1
   3  10 -12 452.129 312.853   1
   3  10  13 840.688 467.651  -2
  -3 -10  12 840.688 467.651   1
   3  10  12 28980.8 1037.58  -2
  -3 -10  11 28980.8 1037.58   1
   3  10  11 6341.82 690.629  -2
  -3 -10  10 6341.82 690.629   1
   3  10  10 78643.1 1437.78  -2
  -3 -10   9 78643.1 1437.78   1
   3  10   9 68223.6 1401.91  -2
  -3 -10   8 68223.6 1401.91   1
   3  10   8 37449.7 1220.30  -2
  -3 -10   7 37449.7 1220.30   1
   3  10   7 96241.8 1837.40  -2
  -3 -10   6 96241.8 1837.40   1
  -3 -10  -6 26047.2 1152.76  -2
   3  10  -5 26047.2 1152.76   1
  -3 -10  -5 20112.3 1038.32  -2
   3  10  -4 20112.3 1038.32   1
  -3 -10   3 1384.11 1089.72   1
   3  10   4 4701.85 835.276  -2
  -3 -10   3 4701.85 835.276   1
  -3 -10   2 4434.31 1082.63   1
   3  10   3 5321.82 694.204  -2
  -3 -10   2 5321.82 694.204   1
  -3 -10   1 27517.7 1583.07   1
  -3 -10  -2 28319.5 1221.25  -2
   3  10  -1 28319.5 1221.25   1
  -3 -10   0 784.673 710.823   1
   3  10   1 2564.79 618.239  -2
  -3 -10   0 2564.79 618.239   1
   3  10   1 1001.26 1044.44   1
   3  10   0 2860.42 663.952  -2
  -3 -10  -1 2860.42 663.952   1
  -3 -10  -2 909.657 676.556   1
   3  10  -1 19469.0 978.952  -2
  -3 -10  -2 19469.0 978.952   1
  -3 -10  -3 1364.07 681.530   1
   3  10  -2 5927.61 763.084  -2
  -3 -10  -3 5927.61 763.084   1
   3  10   4 3826.03 600.155   1
   3  10  -3 5061.41 797.831  -2
  -3 -10  -4 5061.41 797.831   1
  -3 -10  -5 15121.4 1438.28   1
   3  10  -4 21743.2 1012.49  -2
  -3 -10  -5 21743.2 1012.49   1
  -3 -10  -6-290.968 1045.47   1
   3  10  -5 17009.8 1031.24  -2
  -3 -10  -6 17009.8 1031.24   1
  -3 -10  -7 123301. 3399.37   1
   3  10  -6 130802. 2225.30  -2
  -3 -10  -7 130802. 2225.30   1
  -3 -10  -8 2122.90 1306.16   1
   3  10  -7 25413.4 965.107  -2
  -3 -10  -8 25413.4 965.107   1
   3  10   9 37170.7 1824.10   1
   3  10  -8 65437.0 1608.08  -2
  -3 -10  -9 65437.0 1608.08   1
   3  10  10 2877.17 560.455   1
   3  10  -9 56728.8 1348.33  -2
  -3 -10 -10 56728.8 1348.33   1
  -3 -10 -11 4157.07 494.436   1
   3  10 -10 6506.96 701.933  -2
  -3 -10 -11 6506.96 701.933   1
  -3 -10 -12 1337.35 420.821   1
   3  10 -11 22940.8 1466.85  -2
  -3 -10 -12 22940.8 1466.85   1
  -3 -10 -13 464.433 392.607   1
  -3 -10 -14 9.59648 379.844   1
  -3 -10 -15 35229.2 1030.49   1
  -3 -10 -16 18781.8 784.138   1
   3  10  17-105.392 345.410   1
  -3 -10 -18 355.459 322.194   1
  -3 -10 -19 1926.55 409.284   1
   3  10  20 875.791 394.689   1
  -3 -10 -21 1420.72 260.171   1
   3  10  22 1539.77 227.659   1
   3  11 -20 74.2918 106.405   1
   3  11 -19-9.33572 167.847   1
  -3 -11  18 2946.07 268.603   1
  -3 -11  17 2701.26 315.630   1
  -3 -11  16 784.962 309.916   1
  -3 -11  15 14010.6 647.222   1
  -3 -11  14 9753.15 513.367   1
   3  11 -13 3380.07 427.221   1
  -3 -11  12 472.915 380.580   1
  -3 -11  11 10723.8 608.780   1
   3  11  13 12017.2 640.873  -2
  -3 -11  11 12017.2 640.873   1
  -3 -11  10 2299.21 468.080   1
  -3 -11 -12 2255.98 574.770  -2
   3  11 -10 2255.98 574.770   1
   3  11  11 45319.1 1124.44  -2
  -3 -11   9 45319.1 1124.44   1
   3  11  10 10471.1 809.930  -2
  -3 -11   8 10471.1 809.930   1
   3  11   9 37784.1 1127.48  -2
  -3 -11   7 37784.1 1127.48   1
   3  11   8 15974.3 914.095  -2
  -3 -11   6 15974.3 914.095   1
   3  11   7 7505.30 757.093  -2
  -3 -11   5 7505.30 757.093   1
   3  11   6 12485.8 891.174  -2
  -3 -11   4 12485.8 891.174   1
  -3 -11   3 8487.05 1124.65   1
   3  11   5 11923.4 770.254  -2
  -3 -11   3 11923.4 770.254   1
  -3 -11   2 49796.2 2321.91   1
  -3 -11  -4 50757.5 1555.45  -2
   3  11  -2 50757.5 1555.45   1
  -3 -11   1 7144.37 1253.34   1
   3  11   3 13442.9 1202.09  -2
  -3 -11   1 13442.9 1202.09   1
   3  11   0 3130.79 884.017   1
   3  11   2 42210.2 1250.98  -2
  -3 -11   0 42210.2 1250.98   1
  -3 -11  -1 11737.0 1177.58   1
   3  11   1 20751.6 1079.76  -2
  -3 -11  -1 20751.6 1079.76   1
  -3 -11  -2 53281.0 5282.60   1
   3  11   0 55805.4 1257.58  -2
  -3 -11  -2 55805.4 1257.58   1
  -3 -11  -3 1289.88 1376.95   1
   3  11  -1 13187.9 1377.41  -2
  -3 -11  -3 13187.9 1377.41   1
  -3 -11  -4 400.124 1544.21   1
   3  11  -2 39903.7 1336.46  -2
  -3 -11  -4 39903.7 1336.46   1
   3  11  -3 10734.1 752.532  -2
  -3 -11  -5 10734.1 752.532   1
   3  11  -4 14343.3 797.434  -2
  -3 -11  -6 14343.3 797.434   1
   3  11  -5 4396.07 593.381  -2
  -3 -11  -7 4396.07 593.381   1
   3  11  -6 18174.1 1013.64  -2
  -3 -11  -8 18174.1 1013.64   1
  -3 -11  -9 556.675 413.589   1
   3  11  -7 27920.0 1357.00  -2
  -3 -11  -9 27920.0 1357.00   1
   3  11  -8 11459.7 780.478  -2
  -3 -11 -10 11459.7 780.478   1
   3  11  11 441.329 434.071   1
   3  11  -9 31984.9 1160.26  -2
  -3 -11 -11 31984.9 1160.26   1
   3  11  12 983.459 429.247   1
   3  11 -10 2601.50 563.500  -2
  -3 -11 -12 2601.50 563.500   1
  -3 -11 -13 1866.84 500.678   1
   3  11 -11 9700.24 771.961  -2
  -3 -11 -13 9700.24 771.961   1
  -3 -11 -14 75062.8 1580.69   1
  -3 -11 -15 133.652 364.932   1
  -3 -11 -16 5317.68 437.630   1
   3  11  17 101.824 314.708   1
   3  11  18 21999.3 734.429   1
  -3 -11 -19 2083.80 360.041   1
   3  11  20 1379.92 259.616   1
   3  11  21 11975.9 740.083   1
   3  12 -18 681.853 148.295   1
  -3 -12  17 1220.03 455.270   1
   3  12 -16 48465.3 1719.90   1
   3  12 -15 2859.90 339.295   1
  -3 -12  14 478.730 315.210   1
   3  12  16 1204.69 358.311  -2
  -3 -12  14 1204.69 358.311   1
  -3 -12  13 40.4004 374.446   1
  -3 -12 -15 10273.8 1401.93  -2
   3  12 -13 10273.8 1401.93   1
  -3 -12  12 8839.14 570.557   1
  -3 -12 -14 9191.82 853.080  -2
   3  12 -12 9191.82 853.080   1
  -3 -12  11 7436.33 562.984   1
   3  12  13 8399.59 834.693  -2
  -3 -12  11 8399.59 834.693   1
   3  12  12 10627.4 696.784  -2
  -3 -12  10 10627.4 696.784   1
   3  12  11 10928.4 698.669  -2
  -3 -12   9 10928.4 698.669   1
   3  12  10 60367.4 1354.89  -2
  -3 -12   8 60367.4 1354.89   1
   3  12   9 25456.5 944.937  -2
  -3 -12   7 25456.5 944.937   1
  -3 -12  -8 13832.0 787.527  -2
   3  12  -6 13832.0 787.527   1
  -3 -12   5 11125.2 1042.39   1
   3  12   7 88941.9 1958.28  -2
  -3 -12   5 88941.9 1958.28   1
   3  12   6 14168.9 920.224  -2
  -3 -12   4 14168.9 920.224   1
   3  12   5 16340.2 881.747  -2
  -3 -12   3 16340.2 881.747   1
   3  12   4 5334.85 1981.30  -2
  -3 -12   2 5334.85 1981.30   1
   3  12   3 2408.57 642.860  -2
  -3 -12   1 2408.57 642.860   1
   3  12   2 80991.7 1815.00  -2
  -3 -12   0 80991.7 1815.00   1
   3  12   1 27029.4 6637.54  -2
  -3 -12  -1 27029.4 6637.54   1
   3  12   0 59633.0 1822.51  -2
  -3 -12  -2 59633.0 1822.51   1
   3  12  -1 1573.39 561.503  -2
  -3 -12  -3 1573.39 561.503   1
   3  12  -2 4831.90 661.219  -2
  -3 -12  -4 4831.90 661.219   1
   3  12  -3 19588.7 1013.84  -2
  -3 -12  -5 19588.7 1013.84   1
   3  12  -4 15511.4 1091.25  -2
  -3 -12  -6 15511.4 1091.25   1
   3  12  -5 112344. 2005.69  -2
  -3 -12  -7 112344. 2005.69   1
   3  12  -6 13759.5 852.573  -2
  -3 -12  -8 13759.5 852.573   1
   3  12  -7 26314.1 1044.91  -2
  -3 -12  -9 26314.1 1044.91   1
   3  12  -8 42348.5 1162.76  -2
  -3 -12 -10 42348.5 1162.76   1
   3  12  -9 9845.48 752.047  -2
  -3 -12 -11 9845.48 752.047   1
   3  12 -10 8995.48 735.811  -2
  -3 -12 -12 8995.48 735.811   1
   3  12 -11 6459.26 846.169  -2
  -3 -12 -13 6459.26 846.169   1
  -3 -12  12 7900.45 695.240  -2
   3  12  14 7900.45 695.240   1
   3  12  15 12795.6 788.432   1
   3  12 -13 14476.1 756.580  -2
  -3 -12 -15 14476.1 756.580   1
  -3 -12 -16 582.971 311.842   1
  -3 -12 -17 396.496 249.207   1
   3  12  18 180.724 177.799   1
   3  12  19 7035.45 288.544   1
  -3 -12 -20 364.538 160.762   1
   3  13 -16 420.600 190.367   1
  -3 -13 -17 10434.5 1662.89  -2
   3  13 -15 10434.5 1662.89   1
  -3 -13  14-46.9629 257.866   1
  -3 -13 -16 4377.13 405.733  -2
   3  13 -14 4377.13 405.733   1
  -3 -13  13 827.296 332.307   1
   3  13  15 295.160 540.398  -2
  -3 -13  13 295.160 540.398   1
   3  13  14 36279.9 1888.43  -2
  -3 -13  12 36279.9 1888.43   1
  -3 -13 -13 12202.7 589.417  -2
   3  13 -11 12202.7 589.417   1
   3  13  12 5981.55 605.082  -2
  -3 -13  10 5981.55 605.082   1
   3  13  11 31627.5 1210.28  -2
  -3 -13   9 31627.5 1210.28   1
   3  13  10-22.6901 216.991  -2
  -3 -13   8-22.6901 216.991   1
   3  13   9 83107.1 1456.81  -2
  -3 -13   7 83107.1 1456.81   1
   3  13   8 4341.81 624.635  -2
  -3 -13   6 4341.81 624.635   1
  -3 -13  -7 23467.9 956.041  -2
   3  13  -5 23467.9 956.041   1
   3  13   6 4314.22 677.217  -2
  -3 -13   4 4314.22 677.217   1
   3  13   5 39690.0 1319.20  -2
  -3 -13   3 39690.0 1319.20   1
   3  13   4 19716.3 1029.12  -2
  -3 -13   2 19716.3 1029.12   1
   3  13   3 7400.33 3169.29  -2
  -3 -13   1 7400.33 3169.29   1
   3  13   2 18439.8 928.529  -2
  -3 -13   0 18439.8 928.529   1
   3  13   1 19073.4 1068.03  -2
  -3 -13  -1 19073.4 1068.03   1
   3  13   0 24362.9 1626.56  -2
  -3 -13  -2 24362.9 1626.56   1
   3  13  -1 4385.09 669.376  -2
  -3 -13  -3 4385.09 669.376   1
   3  13  -2 14700.1 925.358  -2
  -3 -13  -4 14700.1 925.358   1
   3  13  -3 51613.6 1375.43  -2
  -3 -13  -5 51613.6 1375.43   1
   3  13  -4 5066.87 631.133  -2
  -3 -13  -6 5066.87 631.133   1
   3  13  -5 23361.6 1022.71  -2
  -3 -13  -7 23361.6 1022.71   1
   3  13  -6 3301.62 788.014  -2
  -3 -13  -8 3301.62 788.014   1
   3  13  -7 73927.6 1662.79  -2
  -3 -13  -9 73927.6 1662.79   1
   3  13  -8 597.001 566.651  -2
  -3 -13 -10 597.001 566.651   1
   3  13  -9 23473.9 1307.45  -2
  -3 -13 -11 23473.9 1307.45   1
   3  13 -10 4918.46 633.866  -2
  -3 -13 -12 4918.46 633.866   1
   3  13 -11 12228.1 719.056  -2
  -3 -13 -13 12228.1 719.056   1
   3  13 -12 54625.1 1174.38  -2
  -3 -13 -14 54625.1 1174.38   1
   3  13 -13 853.171 490.099  -2
  -3 -13 -15 853.171 490.099   1
   3  13 -14 5496.35 537.484  -2
  -3 -13 -16 5496.35 537.484   1
   3  13 -15 9282.30 454.563  -2
  -3 -13 -17 9282.30 454.563   1
  -3 -13 -18 9715.47 384.952   1
  -3 -13  16 10250.5 473.049  -2
   3  13  18 10250.5 473.049   1
  -3 -14 -16 25281.7 822.917  -2
   3  14 -14 25281.7 822.917   1
  -3 -14 -15 3448.69 476.471  -2
   3  14 -13 3448.69 476.471   1
   3  14  14 6319.44 357.811  -2
  -3 -14  12 6319.44 357.811   1
   3  14  13 757.169 320.832  -2
  -3 -14  11 757.169 320.832   1
  -3 -14 -12 8069.02 463.526  -2
   3  14 -10 8069.02 463.526   1
   3  14  11 5603.76 447.192  -2
  -3 -14   9 5603.76 447.192   1
   3  14  10 7396.55 541.970  -2
  -3 -14   8 7396.55 541.970   1
   3  14   9 3577.13 520.281  -2
  -3 -14   7 3577.13 520.281   1
  -3 -14  -8 9455.45 685.421  -2
   3  14  -6 9455.45 685.421   1
   3  14   7 5914.16 588.071  -2
  -3 -14   5 5914.16 588.071   1
   3  14   6 17892.4 1071.10  -2
  -3 -14   4 17892.4 1071.10   1
   3  14   5 1271.69 444.655  -2
  -3 -14   3 1271.69 444.655   1
   3  14   4 1621.47 469.996  -2
  -3 -14   2 1621.47 469.996   1
   3  14   3 3199.99 544.610  -2
  -3 -14   1 3199.99 544.610   1
   3  14   2 89852.7 2350.63  -2
  -3 -14   0 89852.7 2350.63   1
   3  14   1 11010.2 9867.36  -2
  -3 -14  -1 11010.2 9867.36   1
   3  14   0 69659.7 1615.81  -2
  -3 -14  -2 69659.7 1615.81   1
   3  14  -1 2985.96 549.895  -2
  -3 -14  -3 2985.96 549.895   1
   3  14  -2 660.554 452.741  -2
  -3 -14  -4 660.554 452.741   1
   3  14  -3 785.600 454.680  -2
  -3 -14  -5 785.600 454.680   1
   3  14  -4 16880.5 885.026  -2
  -3 -14  -6 16880.5 885.026   1
   3  14  -5 6419.39 652.305  -2
  -3 -14  -7 6419.39 652.305   1
   3  14  -6 12014.3 774.680  -2
  -3 -14  -8 12014.3 774.680   1
   3  14  -7 4539.35 599.710  -2
  -3 -14  -9 4539.35 599.710   1
   3  14  -8 7561.00 671.928  -2
  -3 -14 -10 7561.00 671.928   1
   3  14  -9 5603.56 614.142  -2
  -3 -14 -11 5603.56 614.142   1
   3  14 -10 12117.7 850.347  -2
  -3 -14 -12 12117.7 850.347   1
   3  14 -11 522.366 442.118  -2
  -3 -14 -13 522.366 442.118   1
   3  14 -12 7106.53 541.375  -2
  -3 -14 -14 7106.53 541.375   1
   3  14 -13 4935.13 449.951  -2
  -3 -14 -15 4935.13 449.951   1
   3  14 -14 30045.9 680.576  -2
  -3 -14 -16 30045.9 680.576   1
  -3 -15 -13 9803.39 422.136  -2
   3  15 -11 9803.39 422.136   1
  -3 -15 -12 5987.80 758.959  -2
   3  15 -10 5987.80 758.959   1
   3  15  -9 17987.1 376.779   1
   3  15  11 18485.6 1323.39  -2
  -3 -15   9 18485.6 1323.39   1
   3  15  10 241.337 345.340  -2
  -3 -15   8 241.337 345.340   1
  -3 -15  -9 35789.3 2038.18  -2
   3  15  -7 35789.3 2038.18   1
   3  15   8 7699.40 560.733  -2
  -3 -15   6 7699.40 560.733   1
   3  15   7 18509.6 866.039  -2
  -3 -15   5 18509.6 866.039   1
   3  15   6 3462.50 498.313  -2
  -3 -15   4 3462.50 498.313   1
   3  15   5 22559.6 1912.71  -2
  -3 -15   3 22559.6 1912.71   1
   3  15   4 8509.28 1025.79  -2
  -3 -15   2 8509.28 1025.79   1
   3  15   3 9143.16 671.986  -2
  -3 -15   1 9143.16 671.986   1
   3  15   2 724.313 463.691  -2
  -3 -15   0 724.313 463.691   1
   3  15   1 38489.2 1298.20  -2
  -3 -15  -1 38489.2 1298.20   1
   3  15   0 1764.99 1642.02  -2
  -3 -15  -2 1764.99 1642.02   1
  -3 -15   1 9121.20 849.516  -2
   3  15   3 9121.20 849.516   1
   3  15  -2 7023.79 631.874  -2
  -3 -15  -4 7023.79 631.874   1
   3  15  -3 38259.3 1436.52  -2
  -3 -15  -5 38259.3 1436.52   1
   3  15  -4 3565.38 537.877  -2
  -3 -15  -6 3565.38 537.877   1
   3  15  -5 25965.2 1218.47  -2
  -3 -15  -7 25965.2 1218.47   1
   3  15  -6 5126.31 1078.36  -2
  -3 -15  -8 5126.31 1078.36   1
   3  15  -7 42899.2 1610.01  -2
  -3 -15  -9 42899.2 1610.01   1
   3  15  -8 513.341 449.705  -2
  -3 -15 -10 513.341 449.705   1
   3  15  -9 20233.9 814.636  -2
  -3 -15 -11 20233.9 814.636   1
   3  15 -10 5457.73 486.925  -2
  -3 -15 -12 5457.73 486.925   1
   3  15 -11 9761.05 498.156  -2
  -3 -15 -13 9761.05 498.156   1
   3  16   9 9909.20 424.230  -2
  -3 -16   7 9909.20 424.230   1
   3  16   8 2941.77 129.712  -2
  -3 -16   6 2941.77 129.712   1
   3  16   7 3661.40 467.108  -2
  -3 -16   5 3661.40 467.108   1
   3  16   6 2942.29 373.792  -2
  -3 -16   4 2942.29 373.792   1
   3  16   5 1215.03 350.108  -2
  -3 -16   3 1215.03 350.108   1
   3  16   4 141.712 183.791  -2
  -3 -16   2 141.712 183.791   1
   3  16   3 12835.7 644.407  -2
  -3 -16   1 12835.7 644.407   1
   3  16   2 55517.8 1230.99  -2
  -3 -16   0 55517.8 1230.99   1
   3  16   1 6745.10 1884.64  -2
  -3 -16  -1 6745.10 1884.64   1
   3  16   0 43349.1 1069.01  -2
  -3 -16  -2 43349.1 1069.01   1
   3  16  -1 11519.2 1827.82  -2
  -3 -16  -3 11519.2 1827.82   1
   3  16  -2 622.292 386.840  -2
  -3 -16  -4 622.292 386.840   1
   3  16  -3 1088.41 418.679  -2
  -3 -16  -5 1088.41 418.679   1
   3  16  -4 2269.58 547.850  -2
  -3 -16  -6 2269.58 547.850   1
   3  16  -5 4995.73 453.543  -2
  -3 -16  -7 4995.73 453.543   1
   3  16  -6 5317.78 651.863  -2
  -3 -16  -8 5317.78 651.863   1
   3  16  -7 7711.57 1662.08  -2
  -3 -16  -9 7711.57 1662.08   1
   4 -16  -6 79.3288 145.589   1
  -4  16  -5 3850.86 355.110  -2
   4 -16  -5 3850.86 355.110   1
  -4  16  -4 5869.19 413.588  -2
   4 -16  -4 5869.19 413.588   1
  -4  16  -3 5972.76 444.663  -2
   4 -16  -3 5972.76 444.663   1
  -4  16  -2 3824.13 430.683  -2
   4 -16  -2 3824.13 430.683   1
  -4  16  -1 58788.4 4615.42  -2
   4 -16  -1 58788.4 4615.42   1
  -4  16   0 27924.4 3483.81  -2
   4 -16   0 27924.4 3483.81   1
  -4  16   1 47751.8 1611.70  -2
   4 -16   1 47751.8 1611.70   1
  -4  16   2 5391.40 453.070  -2
   4 -16   2 5391.40 453.070   1
  -4  16   3 6697.74 435.139  -2
   4 -16   3 6697.74 435.139   1
  -4  16   4 5209.95 444.542  -2
   4 -16   4 5209.95 444.542   1
  -4  16   5 2713.44 343.717  -2
   4 -16   5 2713.44 343.717   1
   4 -15 -11 443.956 122.635   1
  -4  15 -10 23950.2 796.835  -2
   4 -15 -10 23950.2 796.835   1
  -4  15  -9 15809.6 793.448  -2
   4 -15  -9 15809.6 793.448   1
   4 -15  -8 2167.03 243.685   1
  -4  15  -8 7963.85 509.773  -2
   4 -15  -8 7963.85 509.773   1
  -4  15  -7 2763.19 421.040  -2
   4 -15  -7 2763.19 421.040   1
  -4  15  -6 45988.7 1434.93  -2
   4 -15  -6 45988.7 1434.93   1
  -4  15  -5 5672.32 538.558  -2
   4 -15  -5 5672.32 538.558   1
  -4  15  -4 96.0902 393.078  -2
   4 -15  -4 96.0902 393.078   1
  -4  15  -3 16314.5 787.559  -2
   4 -15  -3 16314.5 787.559   1
  -4  15  -2 22510.4 1011.91  -2
   4 -15  -2 22510.4 1011.91   1
  -4  15  -1 1749.66 498.304  -2
   4 -15  -1 1749.66 498.304   1
  -4  15   0 18541.3 784.616  -2
   4 -15   0 18541.3 784.616   1
  -4  15   1 2633.49 540.915  -2
   4 -15   1 2633.49 540.915   1
  -4  15   2 23351.7 892.296  -2
   4 -15   2 23351.7 892.296   1
  -4  15   3 13674.1 763.915  -2
   4 -15   3 13674.1 763.915   1
  -4  15   4 641.203 545.335  -2
   4 -15   4 641.203 545.335   1
  -4  15   5 7486.43 628.644  -2
   4 -15   5 7486.43 628.644   1
  -4  15   6 46818.7 1025.80  -2
   4 -15   6 46818.7 1025.80   1
[truncated: 546,908 more chars]
