# Supplementary material
Source: MDPI journal article supplement (https://www.mdpi.com/2304-6740/7/3/28)
Supplement: s1 [file s1 › inorganics-445955-supplementary/cif and checkcif files/complex 5.cif]

 
data_VV_ML83_III_0ma_a
 
_audit_creation_method            'SHELXL-2014/7'
_shelx_SHELXL_version_number      '2014/7'
_chemical_name_systematic         ?
_chemical_name_common             ?
_chemical_melting_point           ?
_chemical_formula_moiety          ?
_chemical_formula_sum
 'C49 H49 Au2 F6 O P2 Sb' 
_chemical_formula_weight          1345.50

loop_
 _atom_type_symbol
 _atom_type_description
 _atom_type_scat_dispersion_real
 _atom_type_scat_dispersion_imag
 _atom_type_scat_source
 'C'  'C'   0.0033   0.0016
 'International Tables Vol C Tables 4.2.6.8 and 6.1.1.4'
 'H'  'H'   0.0000   0.0000
 'International Tables Vol C Tables 4.2.6.8 and 6.1.1.4'
 'O'  'O'   0.0106   0.0060
 'International Tables Vol C Tables 4.2.6.8 and 6.1.1.4'
 'F'  'F'   0.0171   0.0103
 'International Tables Vol C Tables 4.2.6.8 and 6.1.1.4'
 'P'  'P'   0.1023   0.0942
 'International Tables Vol C Tables 4.2.6.8 and 6.1.1.4'
 'Sb'  'Sb'  -0.5866   1.5461
 'International Tables Vol C Tables 4.2.6.8 and 6.1.1.4'
 'Au'  'Au'  -2.0133   8.8022
 'International Tables Vol C Tables 4.2.6.8 and 6.1.1.4'
 
_space_group_crystal_system       monoclinic
_space_group_IT_number            14
_space_group_name_H-M_alt         'P 21/c'
_space_group_name_Hall            '-P 2ybc'
 
_shelx_space_group_comment
;
The symmetry employed for this shelxl refinement is uniquely defined
by the following loop, which should always be used as a source of
symmetry information in preference to the above space-group names.
They are only intended as comments.
;
 
loop_
 _space_group_symop_operation_xyz
 'x, y, z'
 '-x, y+1/2, -z+1/2'
 '-x, -y, -z'
 'x, -y-1/2, z-1/2'
 
_cell_length_a                    13.9459(8)
_cell_length_b                    31.1012(19)
_cell_length_c                    10.9557(7)
_cell_angle_alpha                 90
_cell_angle_beta                  105.449(2)
_cell_angle_gamma                 90
_cell_volume                      4580.2(5)
_cell_formula_units_Z             4
_cell_measurement_temperature     150(2)
_cell_measurement_reflns_used     105
_cell_measurement_theta_min       4.4409
_cell_measurement_theta_max       18.4554
 
_exptl_crystal_description        needle
_exptl_crystal_colour             'colorless'
_exptl_crystal_density_meas       ?
_exptl_crystal_density_method     'not measured'
_exptl_crystal_density_diffrn     1.951          
_exptl_crystal_F_000              2576
_exptl_transmission_factor_min    0.4744
_exptl_transmission_factor_max    0.7452
_exptl_crystal_size_max           0.364
_exptl_crystal_size_mid           0.115
_exptl_crystal_size_min           0.095
_exptl_absorpt_coefficient_mu     7.107
_shelx_estimated_absorpt_T_min    ?
_shelx_estimated_absorpt_T_max    ?
_exptl_absorpt_correction_type    multi-scan
_exptl_absorpt_correction_T_min   ?
_exptl_absorpt_correction_T_max   ?
_exptl_absorpt_process_details    'SADABS V2014/5 (Bruker AXS Inc.)'
_exptl_absorpt_special_details    ?
_diffrn_ambient_temperature       150(2)
_diffrn_radiation_wavelength      0.71073
_diffrn_radiation_type            MoK\a
_diffrn_source                    ?
_diffrn_measurement_device_type   'Bruker ApexII Triumph monochromator sealed tube'
_diffrn_measurement_method        'Photon 50 CMOS detector'
_diffrn_detector_area_resol_mean  ?
_diffrn_reflns_number             25854
_diffrn_reflns_av_unetI/netI      0.0720
_diffrn_reflns_av_R_equivalents   0.0557
_diffrn_reflns_limit_h_min        -15
_diffrn_reflns_limit_h_max        16
_diffrn_reflns_limit_k_min        -37
_diffrn_reflns_limit_k_max        37
_diffrn_reflns_limit_l_min        -13
_diffrn_reflns_limit_l_max        11
_diffrn_reflns_theta_min          2.331
_diffrn_reflns_theta_max          25.188
_diffrn_reflns_theta_full         25.188
_diffrn_measured_fraction_theta_max   0.995
_diffrn_measured_fraction_theta_full  0.995
_diffrn_reflns_Laue_measured_fraction_max    0.995
_diffrn_reflns_Laue_measured_fraction_full   0.995
_diffrn_reflns_point_group_measured_fraction_max   0.995
_diffrn_reflns_point_group_measured_fraction_full  0.995
_reflns_number_total              8204
_reflns_number_gt                 6409
_reflns_threshold_expression      'I > 2\s(I)'
_reflns_Friedel_coverage          0.000
_reflns_Friedel_fraction_max      .
_reflns_Friedel_fraction_full     .
 
_reflns_special_details
;
 Reflections were merged by SHELXL according to the crystal
 class for the calculation of statistics and refinement.
 
 _reflns_Friedel_fraction is defined as the number of unique
 Friedel pairs measured divided by the number that would be
 possible theoretically, ignoring centric projections and
 systematic absences.
;
 
_computing_data_collection        ?
_computing_cell_refinement        ?
_computing_data_reduction         ?
_computing_structure_solution     ?
_computing_structure_refinement 'SHELXL-2014/7 (Sheldrick, 2014)'
_computing_molecular_graphics     ?
_computing_publication_material   ?
_refine_special_details           ?
_refine_ls_structure_factor_coef  Fsqd
_refine_ls_matrix_type            full
_refine_ls_weighting_scheme       calc
_refine_ls_weighting_details
'w=1/[\s^2^(Fo^2^)+(0.0478P)^2^+4.0769P] where P=(Fo^2^+2Fc^2^)/3'
_atom_sites_solution_primary      ?
_atom_sites_solution_secondary    ?
_atom_sites_solution_hydrogens    geom
_refine_ls_hydrogen_treatment     constr
_refine_ls_extinction_method      none
_refine_ls_extinction_coef        .
_refine_ls_number_reflns          8204
_refine_ls_number_parameters      603
_refine_ls_number_restraints      21
_refine_ls_R_factor_all           0.0661
_refine_ls_R_factor_gt            0.0419
_refine_ls_wR_factor_ref          0.1088
_refine_ls_wR_factor_gt           0.0942
_refine_ls_goodness_of_fit_ref    1.083
_refine_ls_restrained_S_all       1.082
_refine_ls_shift/su_max           0.006
_refine_ls_shift/su_mean          0.000
 
loop_
 _atom_site_label
 _atom_site_type_symbol
 _atom_site_fract_x
 _atom_site_fract_y
 _atom_site_fract_z
 _atom_site_U_iso_or_equiv
 _atom_site_adp_type
 _atom_site_occupancy
 _atom_site_site_symmetry_order  
 _atom_site_calc_flag
 _atom_site_refinement_flags_posn
 _atom_site_refinement_flags_adp
 _atom_site_refinement_flags_occupancy
 _atom_site_disorder_assembly
 _atom_site_disorder_group
Au1 Au 0.79305(2) 0.51327(2) 0.88514(3) 0.02529(11) Uani 1 1 d . . . . .
Au2 Au 0.68624(2) 0.59021(2) 0.74965(3) 0.02746(11) Uani 1 1 d . . . . .
P1 P 0.87803(15) 0.46732(7) 0.79561(19) 0.0235(5) Uani 1 1 d . . . . .
P2 P 0.65510(16) 0.60769(7) 0.54191(19) 0.0253(5) Uani 1 1 d . . . . .
O1 O 0.7154(4) 0.51102(16) 0.5741(5) 0.0190(11) Uani 1 1 d . . . . .
C1 C 0.7259(6) 0.4670(3) 0.5695(7) 0.0213(17) Uani 1 1 d . . . . .
C2 C 0.7953(6) 0.4422(3) 0.6566(7) 0.0253(18) Uani 1 1 d . . . . .
C3 C 0.7936(6) 0.3990(3) 0.6333(8) 0.032(2) Uani 1 1 d . . . . .
H3 H 0.8386 0.3808 0.6911 0.039 Uiso 1 1 calc R U . . .
C4 C 0.7274(7) 0.3806(3) 0.5263(9) 0.036(2) Uani 1 1 d . . . . .
H4 H 0.7311 0.3507 0.5100 0.043 Uiso 1 1 calc R U . . .
C5 C 0.6573(6) 0.4056(3) 0.4451(8) 0.031(2) Uani 1 1 d . . . . .
H5 H 0.6098 0.3929 0.3761 0.037 Uiso 1 1 calc R U . . .
C6 C 0.6564(5) 0.4492(3) 0.4646(7) 0.0216(17) Uani 1 1 d . . . . .
C7 C 0.6343(6) 0.5215(3) 0.4755(7) 0.0223(18) Uani 1 1 d . . . . .
C8 C 0.5953(6) 0.5622(3) 0.4477(7) 0.0250(18) Uani 1 1 d . . . . .
C9 C 0.5100(6) 0.5655(3) 0.3469(7) 0.0272(19) Uani 1 1 d . . . . .
H9 H 0.4790 0.5927 0.3261 0.033 Uiso 1 1 calc R U . . .
C10 C 0.4694(6) 0.5291(3) 0.2758(8) 0.033(2) Uani 1 1 d . . . . .
H10 H 0.4118 0.5323 0.2068 0.039 Uiso 1 1 calc R U . . .
C11 C 0.5106(6) 0.4897(3) 0.3036(7) 0.029(2) Uani 1 1 d . . . . .
H11 H 0.4822 0.4654 0.2545 0.035 Uiso 1 1 calc R U . . .
C12 C 0.5948(6) 0.4850(3) 0.4046(7) 0.0238(18) Uani 1 1 d . . . . .
C13 C 0.9754(6) 0.4924(3) 0.7401(7) 0.0257(18) Uani 1 1 d . . . . .
C14 C 1.0194(7) 0.4697(3) 0.6580(7) 0.032(2) Uani 1 1 d . . . . .
H14 H 0.9964 0.4418 0.6297 0.038 Uiso 1 1 calc R U . . .
C15 C 1.0956(7) 0.4880(3) 0.6187(9) 0.042(2) Uani 1 1 d . . . . .
H15 H 1.1247 0.4730 0.5619 0.050 Uiso 1 1 calc R U . . .
C16 C 1.1294(7) 0.5278(3) 0.6619(9) 0.041(2) Uani 1 1 d . . . . .
H16 H 1.1818 0.5405 0.6338 0.049 Uiso 1 1 calc R U . . .
C17 C 1.0898(7) 0.5498(4) 0.7441(9) 0.045(3) Uani 1 1 d . . . . .
H17 H 1.1155 0.5772 0.7742 0.054 Uiso 1 1 calc R U . . .
C18 C 1.0115(7) 0.5320(3) 0.7844(8) 0.035(2) Uani 1 1 d . . . . .
H18 H 0.9835 0.5473 0.8419 0.043 Uiso 1 1 calc R U . . .
C19 C 0.9329(6) 0.4224(3) 0.8963(8) 0.0290(19) Uani 1 1 d . . . . .
C20 C 0.8718(7) 0.3992(3) 0.9531(8) 0.035(2) Uani 1 1 d . . . . .
H20 H 0.8036 0.4067 0.9374 0.042 Uiso 1 1 calc R U . . .
C21 C 0.9096(7) 0.3650(3) 1.0327(9) 0.042(2) Uani 1 1 d . . . . .
H21 H 0.8673 0.3490 1.0708 0.050 Uiso 1 1 calc R U . . .
C22 C 1.0079(7) 0.3545(3) 1.0560(8) 0.036(2) Uani 1 1 d . . . . .
H22 H 1.0339 0.3312 1.1110 0.043 Uiso 1 1 calc R U . . .
C23 C 1.0697(6) 0.3773(3) 1.0005(8) 0.031(2) Uani 1 1 d . . . . .
H23 H 1.1377 0.3695 1.0169 0.037 Uiso 1 1 calc R U . . .
C24 C 1.0331(6) 0.4122(3) 0.9199(8) 0.031(2) Uani 1 1 d . . . . .
H24 H 1.0758 0.4284 0.8826 0.037 Uiso 1 1 calc R U . . .
C25 C 0.5732(7) 0.6537(3) 0.4968(8) 0.031(2) Uani 1 1 d . . . . .
C26 C 0.5373(7) 0.6720(3) 0.5915(9) 0.037(2) Uani 1 1 d . . . . .
H26 H 0.5551 0.6604 0.6747 0.044 Uiso 1 1 calc R U . . .
C27 C 0.4750(8) 0.7075(3) 0.5624(12) 0.055(3) Uani 1 1 d . . . . .
H27 H 0.4487 0.7198 0.6261 0.066 Uiso 1 1 calc R U . . .
C28 C 0.4511(9) 0.7251(4) 0.4446(14) 0.069(4) Uani 1 1 d . . . . .
H28 H 0.4094 0.7497 0.4268 0.083 Uiso 1 1 calc R U . . .
C29 C 0.4873(9) 0.7070(4) 0.3514(12) 0.065(3) Uani 1 1 d . . . . .
H29 H 0.4691 0.7187 0.2682 0.078 Uiso 1 1 calc R U . . .
C30 C 0.5502(7) 0.6720(3) 0.3786(9) 0.044(2) Uani 1 1 d . . . . .
H30 H 0.5777 0.6605 0.3151 0.053 Uiso 1 1 calc R U . . .
C31 C 0.7644(6) 0.6180(3) 0.4854(8) 0.033(2) Uani 1 1 d . . . . .
C32 C 0.8530(7) 0.6273(3) 0.5730(11) 0.046(3) Uani 1 1 d . . . . .
H32 H 0.8588 0.6262 0.6614 0.055 Uiso 1 1 calc R U . . .
C33 C 0.9340(9) 0.6383(4) 0.5271(17) 0.075(4) Uani 1 1 d . . . . .
H33 H 0.9957 0.6452 0.5854 0.090 Uiso 1 1 calc R U . . .
C34 C 0.9267(11) 0.6396(4) 0.4011(17) 0.074(5) Uani 1 1 d . . . . .
H34 H 0.9831 0.6469 0.3725 0.089 Uiso 1 1 calc R U . . .
C35 C 0.8396(11) 0.6304(4) 0.3164(14) 0.062(3) Uani 1 1 d . . . . .
H35 H 0.8347 0.6314 0.2283 0.074 Uiso 1 1 calc R U . . .
C36 C 0.7589(8) 0.6198(3) 0.3571(9) 0.041(2) Uani 1 1 d . . . . .
H36 H 0.6978 0.6134 0.2968 0.050 Uiso 1 1 calc R U . . .
C37 C 0.7015(6) 0.5650(3) 0.9270(8) 0.0292(19) Uani 1 1 d . . . . .
C38 C 0.6937(6) 0.5448(3) 1.0148(8) 0.029(2) Uani 1 1 d . . . . .
C39 C 0.6688(8) 0.5252(4) 1.1225(8) 0.047(3) Uani 1 1 d . . . . .
H39A H 0.7266 0.5266 1.1965 0.070 Uiso 1 1 calc R U . . .
H39B H 0.6500 0.4951 1.1031 0.070 Uiso 1 1 calc R U . . .
H39C H 0.6130 0.5408 1.1406 0.070 Uiso 1 1 calc R U . . .
Sb1 Sb 0.5833(5) 0.3756(2) 0.0245(6) 0.0330(7) Uani 0.605(15) 1 d D . P A 1
F1 F 0.5633(15) 0.4344(5) 0.0412(19) 0.114(6) Uani 0.605(15) 1 d D . P A 1
F2 F 0.5305(11) 0.3635(9) 0.1582(10) 0.115(9) Uani 0.605(15) 1 d D . P A 1
F3 F 0.604(2) 0.3187(4) 0.002(2) 0.145(11) Uani 0.605(15) 1 d D . P A 1
F4 F 0.6365(12) 0.3882(6) -0.1087(12) 0.062(5) Uani 0.605(15) 1 d D . P A 1
F5 F 0.4582(11) 0.3727(6) -0.0877(15) 0.058(4) Uani 0.605(15) 1 d D . P A 1
F6 F 0.7108(7) 0.3808(6) 0.1417(11) 0.077(5) Uani 0.605(15) 1 d D . P A 1
Sb1' Sb 0.5994(6) 0.3714(3) 0.0509(7) 0.0330(7) Uani 0.395(15) 1 d D . P A 2
F1' F 0.5487(15) 0.4188(7) 0.116(2) 0.085(8) Uani 0.395(15) 1 d D . P A 2
F2' F 0.5606(16) 0.3348(7) 0.160(2) 0.077(8) Uani 0.395(15) 1 d D . P A 2
F3' F 0.652(2) 0.3260(7) -0.016(3) 0.107(12) Uani 0.395(15) 1 d D . P A 2
F4' F 0.6390(16) 0.4077(9) -0.061(2) 0.087(11) Uani 0.395(15) 1 d D . P A 2
F5' F 0.4800(17) 0.3636(12) -0.070(2) 0.15(2) Uani 0.395(15) 1 d D . P A 2
F6' F 0.7230(15) 0.3805(9) 0.171(3) 0.114(6) Uani 0.395(15) 1 d D . P A 2
C40 C 0.2870(13) 0.2809(6) -0.0768(14) 0.096(5) Uani 1 1 d . . . B 2
H40A H 0.2752 0.3012 -0.1489 0.115 Uiso 1 1 calc R U . B 2
H40B H 0.3392 0.2603 -0.0840 0.115 Uiso 1 1 calc R U . B 2
C41 C 0.3172(9) 0.3039(4) 0.0418(13) 0.068(3) Uani 1 1 d . . . B 2
H41A H 0.3020 0.3349 0.0277 0.081 Uiso 1 1 calc R U . B 2
H41B H 0.3897 0.3007 0.0792 0.081 Uiso 1 1 calc R U . B 2
C42 C 0.2617(9) 0.2857(4) 0.1293(11) 0.064(3) Uani 1 1 d . . . B 2
H42A H 0.3085 0.2723 0.2037 0.076 Uiso 1 1 calc R U . B 2
H42B H 0.2245 0.3087 0.1594 0.076 Uiso 1 1 calc R U . B 2
C43 C 0.1916(11) 0.2529(5) 0.0566(13) 0.078(4) Uani 1 1 d . . . B 2
H43A H 0.1232 0.2579 0.0635 0.093 Uiso 1 1 calc R U . B 2
H43B H 0.2127 0.2235 0.0874 0.093 Uiso 1 1 calc R U . B 2
C44 C 0.1971(15) 0.2587(8) -0.0767(16) 0.150(10) Uani 1 1 d . . . B 2
H44A H 0.1960 0.2303 -0.1179 0.180 Uiso 1 1 calc R U . B 2
H44B H 0.1390 0.2754 -0.1251 0.180 Uiso 1 1 calc R U . B 2
C45 C 0.8895(14) 0.2804(5) 0.7582(18) 0.104(5) Uani 1 1 d . . . C 2
H45A H 0.9414 0.2946 0.8259 0.125 Uiso 1 1 calc R U . C 2
H45B H 0.8906 0.2930 0.6756 0.125 Uiso 1 1 calc R U . C 2
C46 C 0.9060(15) 0.2335(6) 0.759(2) 0.120(7) Uani 1 1 d . . . C 2
H46A H 0.9778 0.2266 0.7859 0.144 Uiso 1 1 calc R U . C 2
H46B H 0.8767 0.2210 0.6741 0.144 Uiso 1 1 calc R U . C 2
C47 C 0.8534(14) 0.2172(6) 0.854(2) 0.127(7) Uani 1 1 d . . . C 2
H47A H 0.8303 0.1873 0.8339 0.153 Uiso 1 1 calc R U . C 2
H47B H 0.8981 0.2181 0.9407 0.153 Uiso 1 1 calc R U . C 2
C48 C 0.7698(12) 0.2461(7) 0.8415(17) 0.111(6) Uani 1 1 d . . . C 2
H48A H 0.7603 0.2530 0.9258 0.133 Uiso 1 1 calc R U . C 2
H48B H 0.7079 0.2329 0.7888 0.133 Uiso 1 1 calc R U . C 2
C49 C 0.7954(15) 0.2854(5) 0.780(2) 0.132(8) Uani 1 1 d . . . C 2
H49A H 0.7449 0.2903 0.6986 0.158 Uiso 1 1 calc R U . C 2
H49B H 0.7958 0.3106 0.8351 0.158 Uiso 1 1 calc R U . C 2
 
loop_
 _atom_site_aniso_label
 _atom_site_aniso_U_11
 _atom_site_aniso_U_22
 _atom_site_aniso_U_33
 _atom_site_aniso_U_23
 _atom_site_aniso_U_13
 _atom_site_aniso_U_12
Au1 0.02024(17) 0.0326(2) 0.02395(17) -0.00555(14) 0.00749(12) -0.00057(14)
Au2 0.03146(19) 0.0302(2) 0.02215(17) -0.00277(13) 0.00965(13) -0.00241(14)
P1 0.0182(10) 0.0307(12) 0.0229(10) -0.0039(9) 0.0076(8) -0.0013(9)
P2 0.0281(12) 0.0264(12) 0.0239(10) 0.0011(9) 0.0113(9) -0.0010(9)
O1 0.015(3) 0.023(3) 0.020(3) -0.006(2) 0.006(2) -0.005(2)
C1 0.026(4) 0.023(4) 0.020(4) -0.006(3) 0.014(3) -0.004(3)
C2 0.023(4) 0.031(5) 0.024(4) -0.004(4) 0.010(3) -0.006(4)
C3 0.030(5) 0.028(5) 0.038(5) 0.005(4) 0.009(4) 0.005(4)
C4 0.034(5) 0.017(4) 0.055(6) -0.013(4) 0.009(4) -0.004(4)
C5 0.027(5) 0.032(5) 0.033(5) -0.010(4) 0.009(4) -0.007(4)
C6 0.016(4) 0.030(5) 0.020(4) -0.006(3) 0.007(3) -0.007(3)
C7 0.022(4) 0.035(5) 0.014(4) 0.000(3) 0.012(3) -0.004(3)
C8 0.024(4) 0.040(5) 0.016(4) 0.004(4) 0.014(3) -0.004(4)
C9 0.024(4) 0.033(5) 0.025(4) 0.007(4) 0.008(3) 0.004(4)
C10 0.029(5) 0.047(6) 0.020(4) 0.000(4) 0.003(4) -0.001(4)
C11 0.028(5) 0.042(5) 0.020(4) -0.001(4) 0.012(4) -0.013(4)
C12 0.025(4) 0.031(5) 0.019(4) -0.005(3) 0.012(3) -0.006(4)
C13 0.020(4) 0.035(5) 0.023(4) 0.001(4) 0.008(3) -0.002(4)
C14 0.039(5) 0.034(5) 0.025(4) 0.003(4) 0.014(4) 0.011(4)
C15 0.038(6) 0.054(7) 0.038(5) 0.002(5) 0.018(4) 0.014(5)
C16 0.032(5) 0.060(7) 0.037(5) 0.007(5) 0.022(4) -0.005(5)
C17 0.038(6) 0.055(7) 0.042(5) -0.006(5) 0.011(5) -0.024(5)
C18 0.037(5) 0.044(6) 0.031(5) -0.007(4) 0.019(4) -0.006(4)
C19 0.027(5) 0.030(5) 0.027(4) -0.002(4) 0.002(4) -0.004(4)
C20 0.024(5) 0.043(6) 0.039(5) 0.004(4) 0.010(4) -0.001(4)
C21 0.046(6) 0.034(5) 0.050(6) 0.013(5) 0.023(5) -0.003(4)
C22 0.038(6) 0.034(5) 0.034(5) 0.004(4) 0.004(4) 0.006(4)
C23 0.023(4) 0.032(5) 0.039(5) 0.002(4) 0.009(4) 0.001(4)
C24 0.026(5) 0.038(5) 0.029(4) -0.002(4) 0.009(4) -0.001(4)
C25 0.032(5) 0.030(5) 0.034(5) -0.002(4) 0.011(4) -0.001(4)
C26 0.048(6) 0.027(5) 0.040(5) -0.010(4) 0.019(4) -0.012(4)
C27 0.045(6) 0.043(6) 0.072(8) -0.035(6) 0.009(6) 0.008(5)
C28 0.057(8) 0.044(7) 0.092(10) -0.017(7) -0.006(7) 0.016(6)
C29 0.068(8) 0.048(7) 0.070(8) 0.017(6) 0.005(7) 0.011(6)
C30 0.043(6) 0.047(6) 0.043(5) 0.008(5) 0.013(5) 0.011(5)
C31 0.033(5) 0.027(5) 0.044(5) -0.001(4) 0.018(4) -0.003(4)
C32 0.031(5) 0.047(6) 0.063(7) 0.001(5) 0.018(5) -0.002(5)
C33 0.042(7) 0.037(7) 0.152(15) -0.004(8) 0.037(8) -0.007(5)
C34 0.080(10) 0.031(6) 0.146(14) 0.010(8) 0.092(11) 0.004(6)
C35 0.079(9) 0.042(7) 0.090(9) 0.005(6) 0.068(8) 0.002(6)
C36 0.055(6) 0.030(5) 0.049(6) 0.007(4) 0.031(5) 0.005(5)
C37 0.030(5) 0.038(5) 0.024(4) -0.011(4) 0.014(4) -0.003(4)
C38 0.018(4) 0.046(6) 0.024(4) -0.004(4) 0.009(3) 0.009(4)
C39 0.049(6) 0.067(7) 0.028(5) 0.009(5) 0.018(5) 0.009(5)
Sb1 0.0295(16) 0.0424(11) 0.0276(19) 0.0011(12) 0.0088(13) -0.0070(10)
F1 0.135(14) 0.079(10) 0.116(13) -0.024(9) 0.013(11) -0.006(9)
F2 0.048(9) 0.27(3) 0.026(6) -0.007(10) 0.015(6) -0.066(13)
F3 0.24(3) 0.039(9) 0.143(18) 0.030(10) 0.029(18) 0.019(13)
F4 0.034(7) 0.120(14) 0.037(6) 0.019(7) 0.019(5) -0.001(8)
F5 0.038(7) 0.093(10) 0.042(9) -0.012(7) 0.008(6) -0.024(7)
F6 0.014(5) 0.169(15) 0.048(7) 0.010(8) 0.009(4) -0.016(6)
Sb1' 0.0295(16) 0.0424(11) 0.0276(19) 0.0011(12) 0.0088(13) -0.0070(10)
F1' 0.070(13) 0.074(16) 0.110(19) -0.034(14) 0.020(13) 0.033(12)
F2' 0.063(14) 0.096(16) 0.086(15) 0.050(13) 0.044(11) 0.002(11)
F3' 0.14(2) 0.070(19) 0.13(2) -0.054(17) 0.072(19) 0.013(15)
F4' 0.021(9) 0.12(2) 0.11(2) 0.10(2) 0.011(14) 0.006(13)
F5' 0.07(2) 0.35(7) 0.030(13) 0.00(2) 0.006(12) -0.07(3)
F6' 0.135(14) 0.079(10) 0.116(13) -0.024(9) 0.013(11) -0.006(9)
C40 0.109(13) 0.105(13) 0.078(10) -0.018(9) 0.031(9) -0.029(10)
C41 0.059(8) 0.055(8) 0.094(10) -0.009(7) 0.030(7) -0.002(6)
C42 0.071(8) 0.061(8) 0.051(7) 0.006(6) 0.003(6) -0.009(6)
C43 0.089(10) 0.071(9) 0.083(9) -0.013(7) 0.040(8) -0.023(8)
C44 0.137(17) 0.24(3) 0.082(12) -0.085(14) 0.045(12) -0.108(18)
C45 0.105(14) 0.084(12) 0.129(15) -0.006(10) 0.043(12) -0.031(10)
C46 0.130(16) 0.095(14) 0.156(17) -0.049(12) 0.074(14) -0.013(11)
C47 0.107(14) 0.110(15) 0.18(2) 0.073(14) 0.062(14) 0.036(12)
C48 0.074(11) 0.166(19) 0.095(12) 0.035(12) 0.026(9) 0.036(12)
C49 0.108(16) 0.057(10) 0.21(2) -0.003(12) 0.002(15) -0.015(10)
 
_geom_special_details
;
 All esds (except the esd in the dihedral angle between two l.s. planes)
 are estimated using the full covariance matrix.  The cell esds are taken
 into account individually in the estimation of esds in distances, angles
 and torsion angles; correlations between esds in cell parameters are only
 used when they are defined by crystal symmetry.  An approximate (isotropic)
 treatment of cell esds is used for estimating esds involving l.s. planes.
;
 
loop_
 _geom_bond_atom_site_label_1
 _geom_bond_atom_site_label_2
 _geom_bond_distance
 _geom_bond_site_symmetry_2
 _geom_bond_publ_flag
Au1 C37 2.178(8) . ?
Au1 P1 2.242(2) . ?
Au1 C38 2.439(8) . ?
Au1 Au2 2.9952(5) . ?
Au2 C37 2.053(9) . ?
Au2 P2 2.267(2) . ?
P1 C13 1.805(8) . ?
P1 C19 1.817(9) . ?
P1 C2 1.823(8) . ?
P2 C8 1.817(9) . ?
P2 C25 1.817(9) . ?
P2 C31 1.820(9) . ?
O1 C1 1.379(10) . ?
O1 C7 1.379(9) . ?
C1 C2 1.396(11) . ?
C1 C6 1.405(10) . ?
C2 C3 1.368(12) . ?
C3 C4 1.407(12) . ?
C3 H3 0.9500 . ?
C4 C5 1.375(12) . ?
C4 H4 0.9500 . ?
C5 C6 1.373(12) . ?
C5 H5 0.9500 . ?
C6 C12 1.452(12) . ?
C7 C8 1.379(12) . ?
C7 C12 1.404(11) . ?
C8 C9 1.395(11) . ?
C9 C10 1.404(12) . ?
C9 H9 0.9500 . ?
C10 C11 1.355(13) . ?
C10 H10 0.9500 . ?
C11 C12 1.390(11) . ?
C11 H11 0.9500 . ?
C13 C18 1.371(13) . ?
C13 C14 1.406(12) . ?
C14 C15 1.372(13) . ?
C14 H14 0.9500 . ?
C15 C16 1.365(14) . ?
C15 H15 0.9500 . ?
C16 C17 1.358(14) . ?
C16 H16 0.9500 . ?
C17 C18 1.397(13) . ?
C17 H17 0.9500 . ?
C18 H18 0.9500 . ?
C19 C20 1.385(13) . ?
C19 C24 1.389(12) . ?
C20 C21 1.387(13) . ?
C20 H20 0.9500 . ?
C21 C22 1.365(13) . ?
C21 H21 0.9500 . ?
C22 C23 1.376(13) . ?
C22 H22 0.9500 . ?
C23 C24 1.406(12) . ?
C23 H23 0.9500 . ?
C24 H24 0.9500 . ?
C25 C30 1.372(13) . ?
C25 C26 1.387(12) . ?
C26 C27 1.389(14) . ?
C26 H26 0.9500 . ?
C27 C28 1.359(17) . ?
C27 H27 0.9500 . ?
C28 C29 1.374(18) . ?
C28 H28 0.9500 . ?
C29 C30 1.380(15) . ?
C29 H29 0.9500 . ?
C30 H30 0.9500 . ?
C31 C32 1.378(13) . ?
C31 C36 1.389(13) . ?
C32 C33 1.396(16) . ?
C32 H32 0.9500 . ?
C33 C34 1.36(2) . ?
C33 H33 0.9500 . ?
C34 C35 1.348(19) . ?
C34 H34 0.9500 . ?
C35 C36 1.357(15) . ?
C35 H35 0.9500 . ?
C36 H36 0.9500 . ?
C37 C38 1.177(12) . ?
C38 C39 1.450(13) . ?
C39 H39A 0.9800 . ?
C39 H39B 0.9800 . ?
C39 H39C 0.9800 . ?
Sb1 F3 1.819(13) . ?
Sb1 F2 1.844(10) . ?
Sb1 F5 1.849(13) . ?
Sb1 F4 1.848(10) . ?
Sb1 F1 1.867(13) . ?
Sb1 F6 1.903(9) . ?
Sb1' F3' 1.831(14) . ?
Sb1' F2' 1.835(13) . ?
Sb1' F5' 1.848(16) . ?
Sb1' F4' 1.860(13) . ?
Sb1' F1' 1.857(14) . ?
Sb1' F6' 1.889(15) . ?
C40 C44 1.43(2) . ?
C40 C41 1.445(18) . ?
C40 H40A 0.9900 . ?
C40 H40B 0.9900 . ?
C41 C42 1.495(17) . ?
C41 H41A 0.9900 . ?
C41 H41B 0.9900 . ?
C42 C43 1.490(17) . ?
C42 H42A 0.9900 . ?
C42 H42B 0.9900 . ?
C43 C44 1.49(2) . ?
C43 H43A 0.9900 . ?
C43 H43B 0.9900 . ?
C44 H44A 0.9900 . ?
C44 H44B 0.9900 . ?
C45 C49 1.40(2) . ?
C45 C46 1.48(2) . ?
C45 H45A 0.9900 . ?
C45 H45B 0.9900 . ?
C46 C47 1.51(2) . ?
C46 H46A 0.9900 . ?
C46 H46B 0.9900 . ?
C47 C48 1.45(2) . ?
C47 H47A 0.9900 . ?
C47 H47B 0.9900 . ?
C48 C49 1.49(2) . ?
C48 H48A 0.9900 . ?
C48 H48B 0.9900 . ?
C49 H49A 0.9900 . ?
C49 H49B 0.9900 . ?
 
loop_
 _geom_angle_atom_site_label_1
 _geom_angle_atom_site_label_2
 _geom_angle_atom_site_label_3
 _geom_angle
 _geom_angle_site_symmetry_1
 _geom_angle_site_symmetry_3
 _geom_angle_publ_flag
C37 Au1 P1 166.1(2) . . ?
C37 Au1 C38 28.8(3) . . ?
P1 Au1 C38 163.7(2) . . ?
C37 Au1 Au2 43.3(2) . . ?
P1 Au1 Au2 122.92(6) . . ?
C38 Au1 Au2 71.5(2) . . ?
C37 Au2 P2 170.3(2) . . ?
C37 Au2 Au1 46.6(2) . . ?
P2 Au2 Au1 128.77(6) . . ?
C13 P1 C19 107.6(4) . . ?
C13 P1 C2 105.6(4) . . ?
C19 P1 C2 104.4(4) . . ?
C13 P1 Au1 113.9(3) . . ?
C19 P1 Au1 114.2(3) . . ?
C2 P1 Au1 110.4(3) . . ?
C8 P2 C25 107.4(4) . . ?
C8 P2 C31 104.1(4) . . ?
C25 P2 C31 106.9(4) . . ?
C8 P2 Au2 108.7(3) . . ?
C25 P2 Au2 113.6(3) . . ?
C31 P2 Au2 115.5(3) . . ?
C1 O1 C7 106.2(6) . . ?
O1 C1 C2 125.8(7) . . ?
O1 C1 C6 111.3(7) . . ?
C2 C1 C6 122.9(7) . . ?
C3 C2 C1 116.2(7) . . ?
C3 C2 P1 123.6(6) . . ?
C1 C2 P1 120.2(6) . . ?
C2 C3 C4 122.0(8) . . ?
C2 C3 H3 119.0 . . ?
C4 C3 H3 119.0 . . ?
C5 C4 C3 120.3(8) . . ?
C5 C4 H4 119.9 . . ?
C3 C4 H4 119.9 . . ?
C6 C5 C4 119.6(8) . . ?
C6 C5 H5 120.2 . . ?
C4 C5 H5 120.2 . . ?
C5 C6 C1 118.9(8) . . ?
C5 C6 C12 135.7(7) . . ?
C1 C6 C12 105.4(7) . . ?
C8 C7 O1 125.7(7) . . ?
C8 C7 C12 123.1(7) . . ?
O1 C7 C12 111.1(7) . . ?
C7 C8 C9 116.4(8) . . ?
C7 C8 P2 119.6(6) . . ?
C9 C8 P2 123.9(7) . . ?
C8 C9 C10 120.9(8) . . ?
C8 C9 H9 119.5 . . ?
C10 C9 H9 119.5 . . ?
C11 C10 C9 121.3(8) . . ?
C11 C10 H10 119.3 . . ?
C9 C10 H10 119.3 . . ?
C10 C11 C12 119.4(8) . . ?
C10 C11 H11 120.3 . . ?
C12 C11 H11 120.3 . . ?
C11 C12 C7 118.7(8) . . ?
C11 C12 C6 135.5(8) . . ?
C7 C12 C6 105.8(7) . . ?
C18 C13 C14 119.7(8) . . ?
C18 C13 P1 120.5(6) . . ?
C14 C13 P1 119.7(7) . . ?
C15 C14 C13 120.0(9) . . ?
C15 C14 H14 120.0 . . ?
C13 C14 H14 120.0 . . ?
C16 C15 C14 119.5(9) . . ?
C16 C15 H15 120.3 . . ?
C14 C15 H15 120.3 . . ?
C17 C16 C15 121.4(9) . . ?
C17 C16 H16 119.3 . . ?
C15 C16 H16 119.3 . . ?
C16 C17 C18 120.1(9) . . ?
C16 C17 H17 119.9 . . ?
C18 C17 H17 119.9 . . ?
C13 C18 C17 119.2(9) . . ?
C13 C18 H18 120.4 . . ?
C17 C18 H18 120.4 . . ?
C20 C19 C24 120.4(8) . . ?
C20 C19 P1 117.6(7) . . ?
C24 C19 P1 121.9(7) . . ?
C19 C20 C21 120.4(8) . . ?
C19 C20 H20 119.8 . . ?
C21 C20 H20 119.8 . . ?
C22 C21 C20 119.7(9) . . ?
C22 C21 H21 120.1 . . ?
C20 C21 H21 120.1 . . ?
C21 C22 C23 120.6(8) . . ?
C21 C22 H22 119.7 . . ?
C23 C22 H22 119.7 . . ?
C22 C23 C24 120.7(8) . . ?
C22 C23 H23 119.6 . . ?
C24 C23 H23 119.6 . . ?
C19 C24 C23 118.1(8) . . ?
C19 C24 H24 120.9 . . ?
C23 C24 H24 120.9 . . ?
C30 C25 C26 119.8(9) . . ?
C30 C25 P2 123.7(7) . . ?
C26 C25 P2 116.5(7) . . ?
C25 C26 C27 118.8(9) . . ?
C25 C26 H26 120.6 . . ?
C27 C26 H26 120.6 . . ?
C28 C27 C26 121.2(11) . . ?
C28 C27 H27 119.4 . . ?
C26 C27 H27 119.4 . . ?
C27 C28 C29 119.8(11) . . ?
C27 C28 H28 120.1 . . ?
C29 C28 H28 120.1 . . ?
C28 C29 C30 120.0(11) . . ?
C28 C29 H29 120.0 . . ?
C30 C29 H29 120.0 . . ?
C25 C30 C29 120.4(10) . . ?
C25 C30 H30 119.8 . . ?
C29 C30 H30 119.8 . . ?
C32 C31 C36 119.7(9) . . ?
C32 C31 P2 118.5(7) . . ?
C36 C31 P2 121.7(7) . . ?
C31 C32 C33 117.5(11) . . ?
C31 C32 H32 121.3 . . ?
C33 C32 H32 121.3 . . ?
C34 C33 C32 121.7(13) . . ?
C34 C33 H33 119.2 . . ?
C32 C33 H33 119.2 . . ?
C35 C34 C33 120.3(11) . . ?
C35 C34 H34 119.9 . . ?
C33 C34 H34 119.9 . . ?
C34 C35 C36 120.0(12) . . ?
C34 C35 H35 120.0 . . ?
C36 C35 H35 120.0 . . ?
C35 C36 C31 121.0(11) . . ?
C35 C36 H36 119.5 . . ?
C31 C36 H36 119.5 . . ?
C38 C37 Au2 165.4(8) . . ?
C38 C37 Au1 88.0(6) . . ?
Au2 C37 Au1 90.1(3) . . ?
C37 C38 C39 169.4(9) . . ?
C37 C38 Au1 63.2(5) . . ?
C39 C38 Au1 126.9(7) . . ?
C38 C39 H39A 109.5 . . ?
C38 C39 H39B 109.5 . . ?
H39A C39 H39B 109.5 . . ?
C38 C39 H39C 109.5 . . ?
H39A C39 H39C 109.5 . . ?
H39B C39 H39C 109.5 . . ?
F3 Sb1 F2 91.2(11) . . ?
F3 Sb1 F5 90.9(8) . . ?
F2 Sb1 F5 90.8(6) . . ?
F3 Sb1 F4 89.3(9) . . ?
F2 Sb1 F4 179.4(9) . . ?
F5 Sb1 F4 89.5(7) . . ?
F3 Sb1 F1 177.5(10) . . ?
F2 Sb1 F1 91.2(10) . . ?
F5 Sb1 F1 88.5(7) . . ?
F4 Sb1 F1 88.3(8) . . ?
F3 Sb1 F6 91.4(9) . . ?
F2 Sb1 F6 88.9(5) . . ?
F5 Sb1 F6 177.8(7) . . ?
F4 Sb1 F6 90.9(6) . . ?
F1 Sb1 F6 89.3(7) . . ?
F3' Sb1' F2' 90.1(12) . . ?
F3' Sb1' F5' 89.7(12) . . ?
F2' Sb1' F5' 91.2(11) . . ?
F3' Sb1' F4' 89.1(12) . . ?
F2' Sb1' F4' 179.2(13) . . ?
F5' Sb1' F4' 88.5(10) . . ?
F3' Sb1' F1' 177.9(13) . . ?
F2' Sb1' F1' 91.9(11) . . ?
F5' Sb1' F1' 91.0(12) . . ?
F4' Sb1' F1' 88.9(12) . . ?
F3' Sb1' F6' 90.1(11) . . ?
F2' Sb1' F6' 90.7(10) . . ?
F5' Sb1' F6' 178.0(13) . . ?
F4' Sb1' F6' 89.5(10) . . ?
F1' Sb1' F6' 89.1(10) . . ?
C44 C40 C41 106.5(13) . . ?
C44 C40 H40A 110.4 . . ?
C41 C40 H40A 110.4 . . ?
C44 C40 H40B 110.4 . . ?
C41 C40 H40B 110.4 . . ?
H40A C40 H40B 108.6 . . ?
C40 C41 C42 108.2(11) . . ?
C40 C41 H41A 110.1 . . ?
C42 C41 H41A 110.1 . . ?
C40 C41 H41B 110.1 . . ?
C42 C41 H41B 110.1 . . ?
H41A C41 H41B 108.4 . . ?
C43 C42 C41 107.1(10) . . ?
C43 C42 H42A 110.3 . . ?
C41 C42 H42A 110.3 . . ?
C43 C42 H42B 110.3 . . ?
C41 C42 H42B 110.3 . . ?
H42A C42 H42B 108.5 . . ?
C42 C43 C44 104.1(11) . . ?
C42 C43 H43A 110.9 . . ?
C44 C43 H43A 110.9 . . ?
C42 C43 H43B 110.9 . . ?
C44 C43 H43B 110.9 . . ?
H43A C43 H43B 109.0 . . ?
C40 C44 C43 109.4(13) . . ?
C40 C44 H44A 109.8 . . ?
C43 C44 H44A 109.8 . . ?
C40 C44 H44B 109.8 . . ?
C43 C44 H44B 109.8 . . ?
H44A C44 H44B 108.2 . . ?
C49 C45 C46 105.0(15) . . ?
C49 C45 H45A 110.7 . . ?
C46 C45 H45A 110.7 . . ?
C49 C45 H45B 110.7 . . ?
C46 C45 H45B 110.7 . . ?
H45A C45 H45B 108.8 . . ?
C45 C46 C47 103.5(14) . . ?
C45 C46 H46A 111.1 . . ?
C47 C46 H46A 111.1 . . ?
C45 C46 H46B 111.1 . . ?
C47 C46 H46B 111.1 . . ?
H46A C46 H46B 109.0 . . ?
C48 C47 C46 104.7(15) . . ?
C48 C47 H47A 110.8 . . ?
C46 C47 H47A 110.8 . . ?
C48 C47 H47B 110.8 . . ?
C46 C47 H47B 110.8 . . ?
H47A C47 H47B 108.9 . . ?
C47 C48 C49 105.5(15) . . ?
C47 C48 H48A 110.6 . . ?
C49 C48 H48A 110.6 . . ?
C47 C48 H48B 110.6 . . ?
C49 C48 H48B 110.6 . . ?
H48A C48 H48B 108.8 . . ?
C45 C49 C48 109.6(16) . . ?
C45 C49 H49A 109.7 . . ?
C48 C49 H49A 109.7 . . ?
C45 C49 H49B 109.7 . . ?
C48 C49 H49B 109.7 . . ?
H49A C49 H49B 108.2 . . ?
 
_refine_diff_density_max    1.133
_refine_diff_density_min   -1.283
_refine_diff_density_rms    0.195

_shelx_res_file
;

    VV_ML83_III_0ma_a.res created by SHELXL-2014/7


TITL VV_ML83_III_0ma_a.res in P2(1)/c
CELL  0.71073  13.9459  31.1012  10.9557   90.000  105.449   90.000
ZERR    4.000   0.0008   0.0019   0.0007    0.000    0.002    0.000
LATT 1
SYMM -X, 1/2+Y, 1/2-Z
SFAC C  H  O  F  P  Sb Au
UNIT 196  196  4  24  8  4  8
REM Old TITL VV_ML83_III_0ma in P2(1)/c
REM SHELXT solution in P2(1)/c
REM R1 0.127,  Rweak 0.012,  Alpha 0.062,  Orientation as input
REM Formula found by SHELXT:  C43 O3 F6 P2 Sb Au2
rem anion
rem solvent
rem solvent 2
L.S. 10
BOND $H
ACTA
FMAP 2
PLAN 10
TEMP -123.150
WGHT    0.047800    4.076900
FVAR       0.16264   0.60455
PART 0
AU1   7    0.793052    0.513269    0.885139    11.00000    0.02024    0.03259 =
         0.02395   -0.00555    0.00749   -0.00057
AU2   7    0.686237    0.590214    0.749649    11.00000    0.03146    0.03022 =
         0.02215   -0.00277    0.00965   -0.00241
P1    5    0.878032    0.467319    0.795605    11.00000    0.01819    0.03070 =
         0.02286   -0.00393    0.00761   -0.00126
P2    5    0.655102    0.607689    0.541911    11.00000    0.02806    0.02641 =
         0.02395    0.00108    0.01134   -0.00099
O1    3    0.715436    0.511024    0.574096    11.00000    0.01475    0.02331 =
         0.01992   -0.00589    0.00637   -0.00462
C1    1    0.725919    0.467015    0.569495    11.00000    0.02553    0.02256 =
         0.02012   -0.00606    0.01386   -0.00368
C2    1    0.795306    0.442214    0.656597    11.00000    0.02315    0.03087 =
         0.02375   -0.00390    0.00965   -0.00620
C3    1    0.793632    0.398979    0.633260    11.00000    0.02988    0.02803 =
         0.03807    0.00454    0.00855    0.00468
AFIX  43
H3    2    0.838614    0.380814    0.691104    11.00000   -1.20000
AFIX   0
C4    1    0.727365    0.380583    0.526261    11.00000    0.03391    0.01727 =
         0.05462   -0.01288    0.00911   -0.00383
AFIX  43
H4    2    0.731058    0.350711    0.509986    11.00000   -1.20000
AFIX   0
C5    1    0.657286    0.405636    0.445140    11.00000    0.02711    0.03244 =
         0.03256   -0.00963    0.00882   -0.00662
AFIX  43
H5    2    0.609769    0.392869    0.376051    11.00000   -1.20000
AFIX   0
C6    1    0.656389    0.449227    0.464585    11.00000    0.01574    0.03031 =
         0.01989   -0.00572    0.00677   -0.00656
C7    1    0.634325    0.521543    0.475544    11.00000    0.02159    0.03523 =
         0.01408   -0.00030    0.01195   -0.00401
C8    1    0.595343    0.562219    0.447707    11.00000    0.02379    0.04006 =
         0.01642    0.00413    0.01438   -0.00400
C9    1    0.510045    0.565492    0.346923    11.00000    0.02409    0.03294 =
         0.02548    0.00717    0.00819    0.00379
AFIX  43
H9    2    0.479022    0.592695    0.326083    11.00000   -1.20000
AFIX   0
C10   1    0.469376    0.529127    0.275813    11.00000    0.02854    0.04676 =
         0.02023    0.00037    0.00267   -0.00100
AFIX  43
H10   2    0.411781    0.532253    0.206818    11.00000   -1.20000
AFIX   0
C11   1    0.510625    0.489673    0.303622    11.00000    0.02831    0.04152 =
         0.02021   -0.00118    0.01181   -0.01274
AFIX  43
H11   2    0.482240    0.465406    0.254492    11.00000   -1.20000
AFIX   0
C12   1    0.594790    0.485004    0.404604    11.00000    0.02513    0.03080 =
         0.01906   -0.00501    0.01206   -0.00608
C13   1    0.975397    0.492374    0.740148    11.00000    0.01997    0.03534 =
         0.02316    0.00135    0.00796   -0.00175
C14   1    1.019422    0.469731    0.658023    11.00000    0.03936    0.03397 =
         0.02460    0.00338    0.01381    0.01076
AFIX  43
H14   2    0.996377    0.441769    0.629741    11.00000   -1.20000
AFIX   0
C15   1    1.095643    0.487997    0.618714    11.00000    0.03787    0.05423 =
         0.03760    0.00186    0.01818    0.01356
AFIX  43
H15   2    1.124682    0.473026    0.561902    11.00000   -1.20000
AFIX   0
C16   1    1.129421    0.527837    0.661856    11.00000    0.03230    0.06049 =
         0.03745    0.00719    0.02167   -0.00482
AFIX  43
H16   2    1.181757    0.540522    0.633787    11.00000   -1.20000
AFIX   0
C17   1    1.089844    0.549757    0.744065    11.00000    0.03811    0.05532 =
         0.04199   -0.00624    0.01123   -0.02449
AFIX  43
H17   2    1.115509    0.577201    0.774161    11.00000   -1.20000
AFIX   0
C18   1    1.011474    0.532024    0.784448    11.00000    0.03715    0.04387 =
         0.03074   -0.00654    0.01859   -0.00559
AFIX  43
H18   2    0.983541    0.547250    0.841880    11.00000   -1.20000
AFIX   0
C19   1    0.932922    0.422411    0.896264    11.00000    0.02678    0.03021 =
         0.02693   -0.00192    0.00156   -0.00447
C20   1    0.871813    0.399200    0.953059    11.00000    0.02418    0.04272 =
         0.03892    0.00400    0.01034   -0.00141
AFIX  43
H20   2    0.803592    0.406728    0.937420    11.00000   -1.20000
AFIX   0
C21   1    0.909635    0.365021    1.032652    11.00000    0.04598    0.03439 =
         0.05028    0.01278    0.02328   -0.00314
AFIX  43
H21   2    0.867336    0.348984    1.070779    11.00000   -1.20000
AFIX   0
C22   1    1.007878    0.354526    1.055965    11.00000    0.03751    0.03360 =
         0.03438    0.00410    0.00428    0.00633
AFIX  43
H22   2    1.033866    0.331247    1.110987    11.00000   -1.20000
AFIX   0
C23   1    1.069655    0.377349    1.000515    11.00000    0.02321    0.03230 =
         0.03857    0.00165    0.00902    0.00126
AFIX  43
H23   2    1.137707    0.369450    1.016893    11.00000   -1.20000
AFIX   0
C24   1    1.033143    0.412221    0.919903    11.00000    0.02580    0.03805 =
         0.02895   -0.00164    0.00934   -0.00061
AFIX  43
H24   2    1.075831    0.428363    0.882646    11.00000   -1.20000
AFIX   0
C25   1    0.573153    0.653746    0.496838    11.00000    0.03204    0.02979 =
         0.03365   -0.00201    0.01088   -0.00116
C26   1    0.537308    0.672006    0.591495    11.00000    0.04775    0.02660 =
         0.03959   -0.00997    0.01860   -0.01247
AFIX  43
H26   2    0.555053    0.660421    0.674737    11.00000   -1.20000
AFIX   0
C27   1    0.475033    0.707515    0.562437    11.00000    0.04516    0.04267 =
         0.07244   -0.03456    0.00932    0.00828
AFIX  43
H27   2    0.448712    0.719762    0.626090    11.00000   -1.20000
AFIX   0
C28   1    0.451062    0.725060    0.444627    11.00000    0.05667    0.04438 =
         0.09242   -0.01717   -0.00553    0.01618
AFIX  43
H28   2    0.409382    0.749693    0.426771    11.00000   -1.20000
AFIX   0
C29   1    0.487325    0.707046    0.351365    11.00000    0.06840    0.04771 =
         0.07024    0.01652    0.00486    0.01065
AFIX  43
H29   2    0.469143    0.718699    0.268211    11.00000   -1.20000
AFIX   0
C30   1    0.550189    0.672008    0.378606    11.00000    0.04315    0.04727 =
         0.04309    0.00794    0.01342    0.01083
AFIX  43
H30   2    0.577714    0.660473    0.315095    11.00000   -1.20000
AFIX   0
C31   1    0.764423    0.618032    0.485409    11.00000    0.03251    0.02666 =
         0.04417   -0.00094    0.01782   -0.00347
C32   1    0.853003    0.627273    0.573041    11.00000    0.03086    0.04728 =
         0.06294    0.00071    0.01750   -0.00240
AFIX  43
H32   2    0.858777    0.626159    0.661364    11.00000   -1.20000
AFIX   0
C33   1    0.933968    0.638337    0.527060    11.00000    0.04239    0.03722 =
         0.15177   -0.00355    0.03697   -0.00721
AFIX  43
H33   2    0.995723    0.645171    0.585440    11.00000   -1.20000
AFIX   0
C34   1    0.926659    0.639573    0.401059    11.00000    0.07960    0.03077 =
         0.14650    0.01027    0.09203    0.00444
AFIX  43
H34   2    0.983136    0.646934    0.372453    11.00000   -1.20000
AFIX   0
C35   1    0.839586    0.630399    0.316377    11.00000    0.07920    0.04157 =
         0.09039    0.00498    0.06840    0.00219
AFIX  43
H35   2    0.834692    0.631383    0.228258    11.00000   -1.20000
AFIX   0
C36   1    0.758942    0.619759    0.357064    11.00000    0.05485    0.02981 =
         0.04899    0.00692    0.03084    0.00471
AFIX  43
H36   2    0.697772    0.613391    0.296831    11.00000   -1.20000
AFIX   0
C37   1    0.701530    0.565020    0.926991    11.00000    0.02963    0.03769 =
         0.02400   -0.01071    0.01387   -0.00301
C38   1    0.693740    0.544839    1.014762    11.00000    0.01792    0.04635 =
         0.02363   -0.00380    0.00931    0.00862
C39   1    0.668804    0.525244    1.122471    11.00000    0.04890    0.06737 =
         0.02839    0.00862    0.01831    0.00854
AFIX 137
H39A  2    0.726564    0.526574    1.196508    11.00000   -1.50000
H39B  2    0.649987    0.495149    1.103078    11.00000   -1.50000
H39C  2    0.613012    0.540770    1.140607    11.00000   -1.50000
AFIX   0

rem constraints
EADP SB1 SB1'
EADP F1 F6'

rem constraints
SIMU 0.01 SB1 F6'

rem anion
PART 1
SB1   6    0.583259    0.375608    0.024534    21.00000    0.02952    0.04242 =
         0.02765    0.00107    0.00875   -0.00697
F1    4    0.563333    0.434442    0.041186    21.00000    0.13465    0.07879 =
         0.11648   -0.02381    0.01254   -0.00618
F2    4    0.530503    0.363526    0.158217    21.00000    0.04807    0.27348 =
         0.02631   -0.00707    0.01482   -0.06625
F3    4    0.603509    0.318748    0.001638    21.00000    0.23969    0.03888 =
         0.14270    0.02987    0.02890    0.01853
F4    4    0.636538    0.388248   -0.108737    21.00000    0.03357    0.12027 =
         0.03682    0.01930    0.01869   -0.00098
F5    4    0.458193    0.372747   -0.087707    21.00000    0.03794    0.09284 =
         0.04240   -0.01183    0.00835   -0.02363
F6    4    0.710795    0.380774    0.141726    21.00000    0.01434    0.16859 =
         0.04801    0.00984    0.00888   -0.01556

PART 2
SAME SB1 > F6
SB1'  6    0.599420    0.371389    0.050917   -21.00000    0.02952    0.04242 =
         0.02765    0.00107    0.00875   -0.00697
F1'   4    0.548689    0.418802    0.115794   -21.00000    0.07004    0.07364 =
         0.11020   -0.03427    0.02015    0.03285
F2'   4    0.560608    0.334847    0.160392   -21.00000    0.06314    0.09643 =
         0.08568    0.05011    0.04354    0.00204
F3'   4    0.652271    0.325992   -0.015562   -21.00000    0.13836    0.06974 =
         0.13316   -0.05433    0.07205    0.01282
F4'   4    0.639030    0.407742   -0.061446   -21.00000    0.02122    0.12372 =
         0.11149    0.09728    0.01106    0.00561
F5'   4    0.480022    0.363582   -0.070157   -21.00000    0.06957    0.34859 =
         0.02982    0.00259    0.00612   -0.07225
F6'   4    0.723038    0.380525    0.170632   -21.00000    0.13465    0.07879 =
         0.11648   -0.02381    0.01254   -0.00618

rem solvent
C40   1    0.287011    0.280920   -0.076813    11.00000    0.10865    0.10515 =
         0.07761   -0.01775    0.03052   -0.02882
AFIX  23
H40A  2    0.275220    0.301202   -0.148938    11.00000   -1.20000
H40B  2    0.339226    0.260255   -0.084003    11.00000   -1.20000
AFIX   0
C41   1    0.317195    0.303937    0.041834    11.00000    0.05919    0.05488 =
         0.09442   -0.00897    0.02955   -0.00167
AFIX  23
H41A  2    0.301987    0.334923    0.027738    11.00000   -1.20000
H41B  2    0.389721    0.300721    0.079232    11.00000   -1.20000
AFIX   0
C42   1    0.261657    0.285713    0.129333    11.00000    0.07096    0.06100 =
         0.05132    0.00649    0.00312   -0.00932
AFIX  23
H42A  2    0.308455    0.272338    0.203743    11.00000   -1.20000
H42B  2    0.224462    0.308699    0.159441    11.00000   -1.20000
AFIX   0
C43   1    0.191636    0.252852    0.056573    11.00000    0.08871    0.07098 =
         0.08292   -0.01284    0.03959   -0.02325
AFIX  23
H43A  2    0.123206    0.257923    0.063522    11.00000   -1.20000
H43B  2    0.212678    0.223509    0.087382    11.00000   -1.20000
AFIX   0
C44   1    0.197143    0.258684   -0.076723    11.00000    0.13688    0.23967 =
         0.08206   -0.08521    0.04461   -0.10823
AFIX  23
H44A  2    0.195980    0.230288   -0.117928    11.00000   -1.20000
H44B  2    0.138974    0.275404   -0.125066    11.00000   -1.20000
AFIX   0
C45   1    0.889538    0.280405    0.758245    11.00000    0.10491    0.08413 =
         0.12917   -0.00552    0.04300   -0.03141
AFIX  23
H45A  2    0.941396    0.294560    0.825854    11.00000   -1.20000
H45B  2    0.890614    0.292967    0.675591    11.00000   -1.20000
AFIX   0
C46   1    0.905956    0.233519    0.758901    11.00000    0.13027    0.09542 =
         0.15622   -0.04897    0.07430   -0.01283
AFIX  23
H46A  2    0.977815    0.226605    0.785900    11.00000   -1.20000
H46B  2    0.876706    0.220999    0.674053    11.00000   -1.20000
AFIX   0
C47   1    0.853406    0.217176    0.853725    11.00000    0.10666    0.11008 =
         0.17881    0.07344    0.06178    0.03624
AFIX  23
H47A  2    0.830272    0.187251    0.833923    11.00000   -1.20000
H47B  2    0.898106    0.218114    0.940651    11.00000   -1.20000
AFIX   0
C48   1    0.769813    0.246055    0.841544    11.00000    0.07414    0.16594 =
         0.09510    0.03474    0.02634    0.03612
AFIX  23
H48A  2    0.760349    0.252976    0.925769    11.00000   -1.20000
H48B  2    0.707928    0.232909    0.788816    11.00000   -1.20000
AFIX   0
C49   1    0.795433    0.285362    0.779929    11.00000    0.10772    0.05738 =
         0.20721   -0.00258    0.00222   -0.01538
AFIX  23
H49A  2    0.744924    0.290323    0.698561    11.00000   -1.20000
H49B  2    0.795773    0.310606    0.835089    11.00000   -1.20000
AFIX   0
HKLF 4

REM  VV_ML83_III_0ma_a.res in P2(1)/c
REM R1 =  0.0419 for    6409 Fo > 4sig(Fo)  and  0.0661 for all    8204 data
REM    603 parameters refined using     21 restraints

END

WGHT      0.0418      0.0000

REM Highest difference peak  1.133,  deepest hole -1.283,  1-sigma level  0.195
Q1    1   0.8028  0.4843  0.9402  11.00000  0.05    1.13
Q2    1   0.9000  0.4358  1.0249  11.00000  0.05    0.96
Q3    1   0.5184  0.5493  1.1006  11.00000  0.05    0.91
Q4    1   0.7923  0.5359  0.8422  11.00000  0.05    0.86
Q5    1   0.8419  0.3053  0.6151  11.00000  0.05    0.86
Q6    1   0.7799  0.4870  0.8285  11.00000  0.05    0.83
Q7    1   0.9482  0.3835  0.7320  11.00000  0.05    0.81
Q8    1   0.7637  0.4582  0.9183  11.00000  0.05    0.78
Q9    1   0.8430  0.5136  0.9223  11.00000  0.05    0.77
Q10   1   0.3411  0.5225  0.1186  11.00000  0.05    0.75
;
_shelx_res_checksum   21941

_shelx_hkl_file
;
   0   0  -2  557.74   41.70
   0   0   2  518.75   41.60
   0   0   2  569.84   41.90
   0   0  -2  610.74   41.80
   0   0  -3   -0.50    6.20
   0   0  -4  106.39   10.50
   0   0  -4   95.99   13.10
   0   0  -5    2.30    9.30
   0   0  -5   -6.10    6.00
   0   0  -6 1968.90  141.29
   0   0  -6 1914.41  142.09
   0   0  -7    3.80   12.50
   0   0  -7  -14.30    7.50
   0   0  -8 1799.92  126.79
   0   0  -8 1665.93  128.89
   0   0  -9    9.10   10.30
   0   0  -9   17.00   16.90
   0   0 -10  242.78   28.30
   0   0 -10  257.17   24.50
   0   0 -11  -14.70   13.90
   0   0 -11  -23.00   22.10
   0   0 -12   -8.90   25.40
   0   1   2  233.88   18.80
   0   1   2  243.58   19.10
   0   1  -2  248.28   19.90
   0  -1  -2  223.98   18.70
   0  -1  -2  245.48   19.00
   0  -1   2  262.07   19.50
   0  -1   2  247.88   19.70
   0   1  -3   94.49   11.00
   0  -1  -3   85.09   10.90
   0   1  -4   -1.70    5.10
   0   1  -4    0.80    7.80
   0  -1  -4   -8.30    7.60
   0  -1  -4    1.70    5.20
   0   1  -5  692.43   51.49
   0   1  -5  697.83   52.99
   0  -1  -5  692.33   52.99
   0  -1  -5  710.23   51.39
   0   1  -6    8.30    7.10
   0   1  -6   14.80   10.60
   0  -1  -6    2.70    6.80
   0  -1  -6   10.60   10.80
   0   1  -7   70.39    9.30
   0   1  -7   59.39   14.00
   0  -1  -7   55.79    9.20
   0  -1  -7   65.19   13.80
   0   1  -8  244.88   25.60
   0   1  -8  209.48   20.30
   0  -1  -8  191.18   26.00
   0  -1  -8  214.68   19.80
   0   1  -9  680.93   52.39
   0   1  -9  700.43   55.89
   0  -1  -9  685.73   51.99
   0  -1  -9  681.33   55.59
   0   1 -10   55.69   13.70
   0   1 -10   63.99   19.90
   0  -1 -10   63.09   12.50
   0  -1 -10   58.39   19.70
   0   1 -11    4.00   14.70
   0   1 -11   -9.30   21.60
   0  -1 -11  -13.10   22.50
   0  -1 -11  -10.40   15.70
   0   1 -12  -10.00   15.80
   0   1 -12   32.40   29.60
   0  -1 -12    3.30   24.70
   0   2   1    0.40    2.60
   0   2  -2  503.05   39.00
   0   2   2  523.35   38.50
   0   2  -2  520.25   39.20
   0   2   2  498.45   38.40
   0  -2  -2  483.95   38.40
   0  -2  -2  554.94   38.50
   0  -2   2  489.05   39.10
   0   2  -3  288.77   22.90
   0  -2  -3  286.57   22.80
   0   2  -4  334.97   24.70
   0   2  -4  318.57   26.00
   0  -2  -4  310.57   26.00
   0   2  -5 3097.29  224.58
   0   2  -5 3060.79  225.28
   0  -2  -5 3189.08  224.58
   0  -2  -5 3032.60  225.08
   0   2  -6  734.83   55.89
   0   2  -6  733.83   54.59
   0  -2  -6  720.03   55.99
   0  -2  -6  752.62   54.29
   0   2  -7  112.59   15.60
   0   2  -7  125.59   12.30
   0  -2  -7  115.79   15.80
   0  -2  -7  107.49   13.20
   0   2  -8  968.80   69.59
   0   2  -8  946.71   71.79
   0  -2  -8  966.40   69.49
   0  -2  -8  838.82   77.19
   0   2  -9 1129.19   82.39
   0   2  -9 1081.29   85.09
   0  -2  -9 1142.79   84.59
   0  -2  -9 1084.09   82.09
   0   2 -10    7.70   20.10
   0   2 -10   12.10   13.10
   0  -2 -10   52.59   11.60
   0  -2 -10   34.90   18.80
   0   2 -11  115.59   25.30
   0  -2 -11   83.29   25.40
   0  -2 -11  126.59   15.80
   0   2 -12   35.80   26.60
   0   2 -12   19.40   17.00
   0  -2 -12   55.49   26.20
   0   3   1   15.60    4.30
   0   3  -1   15.20    5.80
   0  -3   1   16.50    5.20
   0   3  -2  717.43   52.79
   0   3   2  741.03   51.99
   0   3  -2  576.64   52.69
   0  -3  -2  704.53   51.99
   0  -3  -2  797.22   52.09
   0  -3   2  658.33   52.69
   0  -3   2  694.63   52.59
   0   3  -3 1534.65  110.69
   0   3  -3 1517.15  111.09
   0  -3  -3 1518.15  111.09
   0   3  -4    7.90    5.40
   0   3  -4    0.70    7.80
   0  -3  -4    6.20    8.00
   0   3  -5 1037.60   76.49
   0   3  -5 1048.00   77.49
   0  -3  -5 1072.79   76.29
   0  -3  -5 1013.00   77.29
   0   3  -6    9.20    7.80
   0   3  -6   16.60   10.90
   0  -3  -6   13.90   11.20
   0  -3  -6   18.40    6.40
   0   3  -7   73.79   14.00
   0   3  -7   97.09   10.50
   0  -3  -7   74.59   13.90
   0  -3  -7   60.99    9.10
   0   3  -8   93.59   16.30
   0   3  -8  111.99   12.60
   0  -3  -8  117.19   27.20
   0  -3  -8   91.29   11.10
   0   3  -9  799.92   63.69
   0   3  -9  807.32   61.09
   0  -3  -9  798.32   60.09
   0  -3  -9  819.52   63.59
   0   3 -10   50.79   13.60
   0   3 -10   63.89   20.10
   0  -3 -10   46.90   20.70
   0  -3 -10   63.49   12.60
   0   3 -11   -6.40   13.30
   0   3 -11    3.80   22.90
   0  -3 -11   -2.80   12.50
   0  -3 -11   -0.30   21.60
   0   3 -12    5.50   17.40
   0   3 -12   23.20   27.10
   0  -3 -12   14.90   26.40
   0   4   0  108.59   14.50
   0  -4   0  142.39   14.50
   0   4   1 1080.19   80.99
   0   4   1 1067.79   80.99
   0   4  -1 1130.49   81.39
   0  -4  -1 1134.59   81.09
   0  -4   1 1070.59   82.39
   0  -4   1 1137.29   81.39
   0   4  -2 1052.89   71.29
   0   4   2  965.20   70.39
   0  -4  -2  880.81   70.29
   0  -4   2  970.40   71.09
   0  -4  -2  920.31   70.19
   0   4  -3 1005.70   74.39
   0   4  -3 1032.20   73.89
   0  -4  -3 1001.80   74.19
   0   4  -4 5113.09  366.96
   0   4  -4 5077.79  367.26
   0  -4  -4 5002.70  367.26
   0   4  -5  739.03   55.29
   0   4  -5  722.13   53.89
   0  -4  -5  742.23   53.59
   0  -4  -5  714.63   54.99
   0   4  -6    8.10    7.50
   0   4  -6    7.30   10.40
   0  -4  -6   14.80    6.10
   0  -4  -6   11.90   10.90
   0   4  -7 1075.89   81.29
   0   4  -7 1077.19   79.39
   0  -4  -7 1098.59   80.89
   0  -4  -7 1071.99   79.09
   0   4  -8   12.00   14.80
   0   4  -8   27.00    9.80
   0  -4  -8   24.20   25.70
   0  -4  -8   24.90    8.00
   0   4  -9  463.05   40.80
   0   4  -9  460.95   37.00
   0  -4  -9  427.56   35.50
   0  -4  -9  465.05   40.70
   0   4 -10  924.81   76.29
   0   4 -10  992.00   71.79
   0  -4 -10  937.31   71.09
   0  -4 -10  970.40   75.49
   0   4 -11   76.79   24.20
   0   4 -11   86.49   17.60
   0  -4 -11   84.69   15.50
   0  -4 -11   81.79   23.70
   0   4 -12  220.28   32.10
   0   4 -12  218.78   24.90
   0  -4 -12  239.18   32.50
   0   5   0   -5.60    8.20
   0  -5   0   -5.40    8.40
   0   5  -1   23.90    9.10
   0   5  -1   27.80    9.20
   0   5   1   23.20    7.40
   0  -5   1   23.50    8.70
   0  -5   1   28.10    9.30
   0  -5  -1   28.20    8.00
   0   5  -2    7.60    5.30
   0   5  -2   -6.00    5.00
   0   5  -3  749.42   56.89
   0   5  -3  793.12   56.49
   0  -5  -3  758.12   56.89
   0   5  -4    4.90    6.30
   0   5  -4    9.00    8.00
   0  -5  -4   10.60    8.70
   0   5  -5  444.36   35.20
   0   5  -5  454.45   33.80
   0  -5  -5  439.86   35.50
   0  -5  -5  434.46   33.00
   0   5  -6  575.74   44.90
   0   5  -6  580.84   43.40
   0  -5  -6  564.84   42.60
   0  -5  -6  578.04   44.90
   0   5  -7  128.29   16.50
   0   5  -7  119.99   13.10
   0  -5  -7  145.89   16.80
   0  -5  -7  108.99   12.60
   0   5  -8  168.58   19.50
   0   5  -8  143.19   17.30
   0  -5  -8  140.59   15.30
   0   5  -9  418.46   38.10
   0   5  -9  401.96   33.50
   0  -5  -9  397.66   32.60
   0  -5  -9  414.06   37.70
   0   5 -10   58.69   19.60
   0  -5 -10   60.19   20.40
   0  -5 -10   20.60   11.00
   0   5 -11   18.20   21.90
   0   5 -11   11.40   14.70
   0  -5 -11   29.30   23.10
   0   5 -12   28.90   29.60
   0   5 -12    1.70   18.70
   0  -5 -12   12.30   26.30
   0   6   0   59.79   11.40
   0   6   0   52.89   11.80
   0  -6   0   56.99   11.40
   0  -6   0   59.19   12.50
   0   6   1  147.99   17.10
   0   6  -1  152.98   19.40
   0   6  -1  139.69   18.60
   0   6   1  136.99   18.00
   0  -6  -1  155.28   17.80
   0  -6   1  139.09   18.80
   0  -6   1  136.09   20.00
   0   6  -2 1755.72  127.59
   0   6  -3  208.48   18.20
   0   6  -3  203.68   17.50
   0  -6  -3  208.78   18.30
   0   6  -4 4106.69  301.47
   0   6  -4 4224.08  301.17
   0  -6  -4 4126.49  301.47
   0   6  -5 1176.18   85.69
   0   6  -5 1161.78   86.39
   0  -6  -5 1143.59   86.49
   0  -6  -5 1196.08   85.19
   0   6  -6  541.65   41.40
   0   6  -6  537.35   40.00
   0  -6  -6  511.95   41.40
   0  -6  -6  505.25   38.90
   0   6  -7  682.73   50.89
   0   6  -7  688.43   52.49
   0  -6  -7  642.24   49.90
   0  -6  -7  689.23   52.49
   0   6  -8   15.30   10.80
   0   6  -8   26.20   14.90
   0  -6  -8   67.39   26.50
   0  -6  -8   13.70    7.60
   0   6  -9  185.48   22.70
   0   6  -9  185.68   18.10
   0  -6  -9  169.28   17.80
   0  -6  -9  176.68   23.30
   0   6 -10 1137.59   83.99
   0   6 -10 1104.69   86.99
   0  -6 -10 1181.68   83.69
   0  -6 -10 1058.29   87.79
   0   6 -11   36.00   15.60
   0   6 -11   55.59   22.50
   0  -6 -11   48.60   23.60
   0   6 -12  489.15   50.19
   0   6 -12  449.36   43.40
   0  -6 -12  484.55   49.99
   0   7   0    5.20   11.30
   0   7   0    2.10   11.90
   0  -7   0   -3.20   11.20
   0  -7   0    3.60   12.90
   0   7  -1 1064.39   77.69
   0   7  -2  560.84   45.30
   0   7   2  603.94   43.10
   0   7   2  536.45   44.00
   0   7  -2  578.24   45.60
   0  -7  -2  560.14   43.90
   0  -7  -2  532.25   43.50
   0  -7   2  576.14   45.10
   0  -7   2  553.04   45.40
   0   7  -3  106.99   11.50
   0   7  -3   89.29   12.10
   0  -7  -3   94.89   12.40
   0   7  -4  128.19   15.60
   0   7  -4  123.19   11.80
   0  -7  -4  110.39   15.30
   0   7  -5  237.68   20.60
   0   7  -5  234.98   22.40
   0  -7  -5  249.28   23.00
   0   7  -6  540.05   40.40
   0   7  -6  515.65   41.70
   0  -7  -6  518.05   42.00
   0   7  -7  149.59   17.40
   0   7  -7  145.39   14.50
   0  -7  -7  110.19   13.70
   0  -7  -7  129.09   17.20
   0   7  -8  133.89   18.70
   0   7  -8  140.39   15.20
   0  -7  -8  109.39   27.10
   0  -7  -8  129.89   12.50
   0   7  -9  111.19   19.20
   0   7  -9  129.39   14.70
   0  -7  -9   97.09   20.20
   0  -7  -9   84.59   11.50
   0   7 -10   27.30   13.20
   0   7 -10   40.50   19.70
   0  -7 -10   30.20   21.20
   0   7 -11   63.19   16.40
   0   7 -11   75.09   25.00
   0  -7 -11   69.59   24.20
   0   7 -12   13.30   26.80
   0   7 -12   21.20   16.90
   0  -7 -12   53.79   26.00
   0   8   0 6835.22  495.25
   0   8  -1  735.13   54.39
   0   8  -2 1887.11  132.69
   0  -8  -2 1794.12  132.69
   0  -8   2 1789.52  132.79
   0   8  -3 4388.96  309.37
   0  -8  -3 4141.79  309.37
   0   8  -4  475.05   36.30
   0   8  -4  469.75   37.00
   0  -8  -4  479.15   37.10
   0   8  -5 1871.61  134.49
   0   8  -5 1763.32  134.99
   0   8   5 1931.81  133.99
   0  -8  -5 1809.12  134.89
   0   8  -6   -4.40    9.30
   0   8  -6   -0.30   11.60
   0  -8  -6    7.50   11.80
   0   8  -7   71.79   14.50
   0   8  -7   74.79   11.70
   0  -8  -7   54.09   15.00
   0   8  -8   93.59   17.10
   0   8  -8  100.59   13.80
   0  -8  -8   78.49   21.00
   0   8  -9  405.66   38.10
   0  -8  -9  381.86   38.80
   0   8 -10   77.69   15.50
   0   8 -10  105.79   22.50
   0  -8 -10  105.29   22.70
   0   8 -11  509.35   43.40
   0   8 -11  542.55   50.99
   0  -8 -11  477.75   50.69
   0   8 -12  168.08   33.50
   0   8 -12  201.08   25.20
   0  -8 -12  230.18   32.10
   0   9   0    2.20   13.40
   0   9   0    7.80   13.80
   0  -9   0    5.80   13.60
   0  -9   0   14.30   15.30
   0   9   1  667.63   47.90
   0   9  -1  650.13   47.70
   0  -9   1  610.34   47.80
   0   9  -2 1371.76   97.39
   0  -9   2 1298.97   97.49
   0  -9  -2 1329.67   97.39
   0   9  -3  148.49   13.80
   0  -9  -3  104.49   14.40
   0   9  -4  663.73   48.90
   0   9  -4  632.74   49.30
   0  -9  -4  656.03   49.40
   0   9  -5  556.54   44.30
   0   9  -5  586.44   43.50
   0   9   5  587.24   42.30
   0  -9  -5  547.45   44.60
   0   9   6   26.30    6.70
   0   9  -6   22.60   11.90
   0   9  -6   22.60   10.10
   0  -9  -6   29.50   12.20
   0   9   7  152.08   15.00
   0   9  -7  138.89   16.00
   0   9  -7  150.18   18.20
   0  -9  -7  173.48   18.90
   0   9  -8   34.50   15.60
   0   9  -8   31.70   12.10
   0  -9  -8   20.50   18.10
   0   9  -9  197.28   24.40
   0   9  -9  200.38   20.10
   0  -9  -9  192.98   25.10
   0   9 -10  236.48   28.80
   0   9 -10  210.08   24.60
   0   9 -11   41.40   27.40
   0   9 -11   13.30   16.10
   0  -9 -11   37.80   24.70
   0   9 -12   28.30   17.80
   0   9 -12   42.80   28.70
   0  -9 -12   42.70   27.70
   0  10   0 3704.93  268.67
   0  10  -1   48.40    8.30
   0  10   1   68.49    7.40
   0 -10   1   42.90    8.50
   0 -10  -1   41.80   10.90
   0  10  -2  756.72   55.59
   0  10   2  769.72   54.99
   0 -10  -2  756.42   55.79
   0 -10   2  714.83   55.89
   0  10  -3 3890.21  268.77
   0  10   3 3506.45  268.37
   0 -10   3 3708.23  269.07
   0 -10  -3 3712.43  268.77
   0  10   4   -1.60    5.20
   0  10  -4  -15.50    8.50
   0 -10  -4   -2.10    9.80
   0  10   5  424.16   31.40
   0  10  -5  400.26   34.50
   0  10  -5  431.86   33.50
   0 -10  -5  402.96   34.50
   0  10  -6 1357.66  105.49
   0  10  -6 1446.56  104.49
   0  10   6 1506.05  103.69
   0 -10  -6 1377.06  105.09
   0  10   7  153.58   15.30
   0  10  -7  144.59   22.20
   0  10  -7  179.98   16.70
   0 -10  -7  150.68   19.60
   0  10  -8 1172.18   88.59
   0  10  -8 1105.89   86.69
   0  10   8 1233.08   85.79
   0 -10  -8 1158.48   88.49
   0  10  -9   11.70   13.50
   0  10  -9   16.80   19.10
   0  10   9    8.50   10.90
   0 -10  -9    7.50   18.50
   0  10 -10   74.89   16.30
   0  10 -10   90.99   23.10
   0 -10 -10   74.29   22.30
   0  10 -11  511.45   49.90
   0  10 -11  449.26   41.90
   0 -10 -11  470.45   49.40
   0  10 -12    7.10   27.70
   0  10 -12   12.20   18.60
   0 -10 -12   17.50   27.20
   0  11   0    6.70    7.10
   0  11  -1   18.80    7.90
   0  11   1   45.70    7.00
   0 -11  -1    8.60    9.20
   0 -11   1   28.00    8.70
   0  11  -2  546.25   43.20
   0  11   2  634.54   42.70
   0 -11   2  556.44   43.70
   0 -11  -2  556.34   43.60
   0  11  -3  346.87   28.40
   0  11   3  391.36   26.80
   0 -11   3  324.57   29.00
   0 -11  -3  332.17   28.70
   0  11  -4   31.30   10.10
   0  11   4   59.09    6.90
   0 -11  -4   52.59   11.10
   0  11  -5  556.74   43.30
   0  11   5  570.74   41.90
   0 -11  -5  555.54   44.40
   0  11  -6  475.05   36.80
   0  11   6  439.06   34.40
   0  11  -6  463.65   37.70
   0 -11  -6  444.06   38.00
   0  11  -7   85.79   14.00
   0  11   7   92.19   10.30
   0 -11  -7   86.09   16.20
   0  11  -8   41.90   16.40
   0  11   8    7.20    9.30
   0 -11  -8   27.30   16.90
   0  11   9  165.88   16.70
   0  11  -9  157.18   22.70
   0  11  -9  143.39   18.70
   0 -11  -9  135.89   22.70
   0  11 -10  287.07   30.20
   0  11 -10  335.77   37.50
   0 -11 -10  336.37   37.10
   0  11 -11   12.90   17.10
   0  11 -11    9.10   31.20
   0 -11 -11   24.10   24.80
   0  11 -12   71.39   34.10
   0  11 -12  103.39   21.20
   0 -11 -12  102.19   29.90
   0  12   0   72.19   10.20
   0 -12   0  125.39   14.90
   0  12  -1 1189.98   90.69
   0  12   1 1257.07   90.59
   0 -12   1 1196.58   90.89
   0 -12  -1 1308.47   91.09
   0  12  -2 1871.21  138.29
   0  12   2 1934.11  137.89
   0 -12   2 1816.52  138.39
   0 -12  -2 1960.30  138.29
   0  12  -3   87.99   12.10
   0 -12   3  103.79   13.00
   0 -12  -3  118.59   12.80
   0  12   4   61.69    7.30
   0  12  -4   36.90   10.70
   0 -12   4   46.40   12.50
   0 -12  -4   48.50   11.70
   0  12  -5   14.10   10.40
   0  12   5   -9.70    6.30
   0 -12  -5    4.90   12.20
   0  12   6 1955.80  139.49
   0  12  -6 1925.31  140.39
   0 -12  -6 1871.71  140.99
   0  12   7  983.50   69.99
   0  12  -7  925.01   72.49
   0  12  -7  963.60   71.69
   0 -12  -7  923.01   72.89
   0  12  -8 1036.20   78.59
   0  12  -8  975.40   76.59
   0  12   8 1068.99   75.39
   0 -12  -8  993.60   78.99
   0  12  -9  191.28   25.20
   0  12  -9  176.78   20.50
   0  12   9  195.38   19.10
   0 -12  -9  196.28   24.90
   0  12 -10   27.40   22.60
   0  12 -10   37.50   16.80
   0 -12 -10   47.60   22.40
   0  12 -11    6.30   16.80
   0  12 -11  -28.80   25.60
   0 -12 -11   -7.50   25.50
   0  13   0  -11.30    7.90
   0  13   1   26.70    8.40
   0  13  -1    1.00    8.60
   0 -13   1   35.50   10.60
   0  13  -2   81.49   11.60
   0 -13   2   94.39   11.70
   0 -13  -2   59.79   12.00
   0  13  -3  147.19   18.00
   0 -13   3  174.68   18.40
   0 -13  -3  168.88   18.70
   0  13  -4   91.99   12.60
   0  13   4   78.09    8.60
   0 -13  -4   76.69   12.90
   0 -13   4   59.19   13.20
   0  13  -5  629.24   46.30
   0  13   5  582.94   44.50
   0 -13  -5  589.34   47.00
   0  13   6 1487.85  109.59
   0  13  -6 1544.95  110.69
   0 -13  -6 1479.65  111.39
   0  13  -7   45.20   15.30
   0 -13  -7   61.29   16.50
   0  13  -8  317.37   29.40
   0  13   8  327.97   27.00
   0 -13  -8  290.87   34.40
   0  13   9   11.90   13.20
   0  13  -9   23.90   15.40
   0 -13  -9   21.70   19.60
   0  13 -10  143.49   20.40
   0 -13 -10  130.19   25.90
   0  13 -11   15.70   17.70
   0 -13 -11  -17.80   25.50
   0  14   1 2882.81  208.38
   0  14  -1 2825.72  208.48
   0 -14   1 2766.52  208.68
   0 -14  -1 2998.10  208.78
   0  14   2   77.09    9.10
   0  14  -2   16.50   10.50
   0 -14   2   49.30   11.40
   0  14   3  498.15   34.20
   0  14  -3  415.56   35.60
   0 -14   3  426.26   36.00
   0 -14  -3  436.86   35.80
   0  14   4  423.16   31.30
   0  14  -4  436.86   33.80
   0 -14  -4  391.26   34.30
   0 -14   4  381.26   34.10
   0  14  -5   10.70   11.50
   0  14   5    7.30    6.80
   0 -14   5   20.10   13.80
   0 -14  -5    9.40   12.80
   0  14  -6   87.49   14.30
   0  14   6   64.29    9.40
   0 -14  -6   73.29   16.10
   0  14  -7 2829.52  213.98
   0  14   7 3035.30  213.08
   0 -14  -7 2931.31  214.58
   0  14   8   21.90   11.60
   0  14  -8   50.19   15.10
   0 -14  -8   40.60   18.80
   0  14  -9  206.38   24.20
   0  14   9  231.08   25.60
   0 -14  -9  261.37   28.40
   0  14 -10   30.80   16.70
   0 -14 -10   33.20   23.10
   0  14 -11   47.40   19.30
   0 -14 -11   37.40   26.50
   0 -15   0   75.59   14.40
   0  15  -1  747.23   57.99
   0  15   1  780.72   57.79
   0 -15   1  831.92   58.99
   0 -15  -1  737.03   58.89
   0  15   2  510.95   35.90
   0  15  -2  445.16   36.80
   0 -15  -2  419.66   37.30
   0 -15   2  477.55   37.50
   0  15  -3  159.88   17.60
   0  15   3  220.18   17.30
   0 -15  -3  171.98   20.90
   0 -15   3  180.98   21.40
   0  15  -4    6.50   11.50
   0  15   4   11.70    7.10
   0 -15   4    5.60   13.00
   0 -15  -4   -1.10   12.30
   0  15   5   68.29    9.20
   0  15  -5   76.89   13.90
   0 -15   5   72.69   15.90
   0 -15  -5   75.09   14.80
   0  15   6  757.92   58.89
   0  15  -6  823.52   60.89
   0 -15   6  807.02   62.79
   0 -15  -6  806.12   61.89
   0  15   7    0.70    9.10
   0  15  -7   43.70   14.60
   0 -15  -7   33.90   17.20
   0  15  -8  175.18   20.20
   0  15   8  147.79   16.20
   0 -15  -8  162.48   22.90
   0  15  -9   -0.90   16.50
   0 -15  -9   14.60   21.50
   0 -15 -10  171.98   28.40
   0  15 -11   32.10   19.80
   0 -15 -11   -0.10   27.60
   0  16   0   81.09   11.60
   0  16  -1  964.90   74.29
   0  16   1 1033.60   74.19
   0 -16  -1  977.90   75.19
   0 -16   1 1034.90   75.29
   0  16   2 3404.36  246.98
   0  16  -2 3329.97  247.28
   0 -16  -2 3504.95  247.38
   0 -16   2 3359.96  247.48
   0  16  -3  381.86   34.60
   0  16   3  450.25   33.00
   0 -16   3  435.06   35.80
   0 -16  -3  423.36   34.90
   0  16   4  643.94   48.50
   0  16  -4  695.23   50.29
   0 -16  -4  639.84   50.79
   0 -16   4  624.14   51.29
   0  16   5    9.80    7.80
   0  16  -5   -6.00   12.80
   0 -16  -5  -22.90   13.70
   0 -16   5   14.80   14.80
   0  16  -6  614.54   52.89
   0  16   6  601.44   47.00
   0 -16  -6  646.64   50.99
   0 -16   6  634.24   50.69
   0  16  -7  783.72   60.89
   0  16   7  761.52   58.59
   0 -16   7  819.32   63.69
   0 -16  -7  784.32   62.49
   0  16  -8  246.98   27.20
   0  16   8  190.98   23.50
   0 -16  -8  249.18   26.80
   0 -16   8  251.57   32.50
   0  16  -9   36.10   17.40
   0 -16  -9   51.79   22.30
   0  16 -10  208.68   25.00
   0 -16 -10  218.68   30.70
   0  16 -11   78.49   20.80
   0 -16 -11   26.80   27.50
   0  17   0  -20.70    9.50
   0 -17   0   45.30   14.10
   0  17   1   90.99   11.60
   0 -17   1  118.59   15.40
   0 -17  -1   61.29   14.90
   0  17   2 1638.54  119.39
   0  17  -2 1623.54  119.79
   0 -17  -2 1663.93  119.99
   0 -17   2 1600.84  120.19
   0  17   3  150.98   16.70
   0  17  -3  151.68   16.80
   0 -17   3  157.08   20.80
   0 -17  -3  141.29   19.50
   0  17   4  399.66   31.60
   0  17  -4  415.16   34.30
   0 -17   4  393.96   35.60
   0 -17  -4  397.76   34.90
   0  17  -5   13.40   13.80
   0  17   5    0.90    8.60
   0 -17   5  -12.90   15.70
   0 -17  -5   -9.30   14.30
   0  17  -6   27.10   15.10
   0  17   6   21.90    9.40
   0 -17  -6   18.50   16.50
   0  17  -7   48.10   16.10
   0  17   7   10.80    9.90
   0 -17   7   19.60   20.20
   0 -17  -7   20.50   18.50
   0  17   8  -30.30   11.90
   0  17  -8    5.80   17.10
   0 -17  -8    7.50   19.80
   0 -17   8   13.40   21.70
   0  17  -9    0.80   18.00
   0 -17   9   -3.50   23.40
   0 -17  -9   -5.00   22.80
   0  17 -10  369.76   39.10
   0 -17  10  393.96   45.90
   0 -17 -10  378.86   44.30
   0  17 -11   29.80   21.50
   0 -17 -11   31.10   28.10
   0 -17  11   25.40   30.60
   0  18   0  344.57   30.40
   0 -18   0  411.06   33.50
   0  18  -1   15.50   10.60
   0  18   1   20.00    9.50
   0 -18  -1   -5.90   13.40
   0 -18   1   52.99   14.70
   0  18  -2  665.83   51.49
   0  18   2  671.53   50.79
   0 -18   2  662.53   52.49
   0 -18  -2  680.33   52.09
   0  18   3 2702.63  198.98
   0  18  -3 2728.43  199.48
   0 -18   3 2701.73  199.78
   0 -18  -3 2810.02  199.48
   0  18  -4  409.36   35.90
   0  18   4  425.56   33.30
   0 -18  -4  419.96   36.60
   0 -18   4  430.56   37.30
   0  18   5  329.87   27.00
   0  18  -5  289.97   33.50
   0 -18   5  325.97   31.60
   0 -18  -5  328.77   31.70
   0  18  -6  283.77   29.00
   0  18   6  282.97   24.40
   0 -18  -6  277.57   31.30
   0 -18   6  279.17   32.30
   0  18  -7    3.10   16.70
   0  18   7  -10.40   10.40
   0 -18  -7    7.60   21.00
   0 -18   7   16.70   20.90
   0  18  -8   95.59   19.20
   0  18   8   59.29   12.80
   0 -18  -8   70.19   21.90
   0 -18   8   74.99   23.40
   0  18  -9   86.89   20.10
   0 -18   9   40.20   25.40
   0 -18  -9   91.29   24.70
   0  18 -10  112.29   22.90
   0 -18  10  138.39   35.20
   0 -18 -10   89.69   27.40
   0  18 -11  627.44   53.89
   0 -18  11  688.43   73.09
   0 -18 -11  598.04   61.79
   0  19   0  -17.90   10.30
   0 -19   0   14.30   14.70
   0  19   1  493.95   39.70
   0  19  -1  491.95   40.10
   0 -19   1  528.45   41.80
   0 -19  -1  511.05   41.00
   0  19   2 1195.68   88.09
   0  19  -2 1203.08   88.69
   0 -19  -2 1228.58   89.09
   0 -19   2 1154.88   89.49
   0  19   3  109.99   13.70
   0  19  -3  121.89   16.10
   0 -19  -3  114.59   16.30
   0  19   4   87.29   12.40
   0  19  -4   75.89   15.70
   0 -19  -4   91.39   16.30
   0 -19   4   89.19   17.80
   0  19   5   71.09   11.50
   0  19  -5   54.69   15.80
   0 -19   5   57.79   18.10
   0 -19  -5   68.19   16.90
   0  19   6  159.58   15.70
   0  19  -6  137.49   19.90
   0 -19   6  146.49   22.90
   0 -19  -6  154.38   21.70
   0  19  -7  -10.40   17.40
   0  19   7  -24.40   11.20
   0 -19   7    9.80   20.80
   0  19  -8    0.70   18.10
   0  19   8  -29.10   13.40
   0 -19   8   -2.00   22.30
   0 -19  -8    4.30   21.80
   0  19  -9   27.00   19.70
   0 -19   9   11.20   27.00
   0 -19  -9   15.40   24.00
   0  19 -10  314.67   34.60
   0 -19  10  301.37   38.30
   0 -19 -10  265.47   35.90
   0  20   0  297.67   26.30
   0 -20   0  303.37   29.90
   0  20  -1   39.80   12.30
   0  20   1   42.00   11.50
   0 -20   1   46.30   16.20
   0 -20  -1   51.59   14.60
   0  20   2  309.37   26.90
   0  20  -2  307.77   28.20
   0 -20   2  309.07   30.80
   0 -20  -2  315.27   28.60
   0  20   3 2415.66  176.68
   0  20  -3 2432.36  177.18
   0 -20   3 2417.06  177.78
   0 -20  -3 2430.76  177.28
   0  20  -4   16.80   17.80
   0  20   4   50.29   11.80
   0 -20   4   41.80   16.80
   0 -20  -4   44.90   15.60
   0  20   5  931.91   69.49
   0  20  -5  954.00   71.39
   0 -20  -5  923.51   71.79
   0 -20   5  909.31   72.49
   0  20  -6  119.59   19.80
   0  20   6  136.09   15.50
   0 -20   6  133.79   23.40
   0 -20  -6  137.99   21.10
   0  20   7   -6.80   11.70
   0  20  -7   -6.70   17.30
   0 -20  -7    2.80   21.10
   0 -20   7   -6.60   21.20
   0  20  -8    3.50   19.60
   0 -20  -8    1.00   22.40
   0 -20   8   15.30   23.80
   0  20  -9  366.86   37.50
   0 -20   9  365.96   43.70
   0 -20  -9  355.76   44.50
   0  20 -10   68.49   22.90
   0 -20  10   70.29   31.40
   0 -20 -10   58.79   28.20
   0  21   0    2.10   11.10
   0 -21   0    2.10   15.60
   0  21   1   59.49   12.60
   0  21  -1   74.99   13.80
   0 -21  -1   66.39   15.90
   0 -21   1   75.29   17.30
   0  21   2  456.85   36.30
   0  21  -2  464.45   37.20
   0 -21  -2  451.25   37.70
   0 -21   2  418.46   39.40
   0  21   3   16.20   10.90
   0  21  -3   25.60   15.50
   0 -21  -3   16.00   14.80
   0 -21   3    8.00   17.00
   0  21  -4   29.90   15.50
   0 -21  -4   47.10   16.20
   0 -21   4   50.29   17.60
   0  21  -5    1.60   16.60
   0  21   5   14.90   11.80
   0 -21   5   19.00   25.00
   0 -21  -5   -8.40   16.90
   0  21   6  773.12   61.09
   0  21  -6  800.02   63.59
   0 -21  -6  827.62   64.09
   0 -21   6  832.62   66.59
   0  21  -7  -12.10   18.30
   0  21   7   -8.60   13.00
   0 -21  -7  -10.40   20.90
   0 -21   7   -3.30   22.30
   0  21  -8  195.78   26.60
   0 -21  -8  226.38   28.90
   0  21  -9   38.70   22.00
   0 -21   9   29.10   29.10
   0 -21  -9   36.40   25.50
   0  21 -10   59.19   23.00
   0 -21 -10   32.40   29.10
   0 -21  10   67.39   41.60
   0  22   0  244.18   24.40
   0 -22   0  227.68   27.80
   0  22  -1  314.87   28.40
   0  22   1  313.67   28.00
   0 -22   1  305.77   32.40
   0 -22  -1  311.57   30.30
   0  22  -2  582.64   47.20
   0  22   2  619.84   46.30
   0 -22  -2  595.44   47.90
   0 -22   2  577.24   49.30
   0  22  -3  261.27   27.00
   0  22   3  260.07   24.30
   0 -22   3  231.98   29.80
   0 -22  -3  258.37   27.80
   0  22   4 1016.00   75.69
   0  22  -4  980.90   77.09
   0 -22   4 1039.90   78.19
   0 -22  -4 1010.10   77.19
   0  22   5  136.59   16.30
   0  22  -5  138.89   20.70
   0 -22   5  129.99   23.50
   0 -22  -5  143.79   20.90
   0  22   6  607.64   46.60
   0  22  -6  580.04   49.40
   0 -22   6  575.34   52.19
   0 -22  -6  575.14   50.09
   0  22  -7  297.57   34.10
   0  22   7  293.17   30.00
   0 -22  -7  322.47   36.10
   0 -22   7  314.77   39.80
   0  22  -8  141.69   23.70
   0 -22  -8  129.59   26.80
   0 -22   8  125.19   32.80
   0  22  -9   39.80   22.40
   0 -22  -9   31.10   26.00
   0 -22   9   40.40   27.60
   0  22 -10  181.98   29.20
   0 -22  10  197.88   38.10
   0 -22 -10  213.98   34.00
   0  23   0   -9.80   13.00
   0 -23   0   -8.80   17.10
   0  23  -1  113.59   16.50
   0  23   1  118.59   15.40
   0 -23  -1  115.19   18.30
   0 -23   1  114.09   20.20
   0  23   2  319.37   27.90
   0 -23   2  296.17   32.80
   0 -23  -2  294.37   30.60
   0  23   3  258.17   24.50
   0  23  -3  240.58   24.30
   0 -23  -3  206.18   27.20
   0 -23   3  226.28   30.10
   0  23  -4    4.50   17.40
   0  23   4   32.10   12.90
   0 -23   4   14.90   19.90
   0 -23  -4   17.80   17.10
   0  23  -5  136.39   22.30
   0  23   5  195.98   21.90
   0 -23  -5  159.58   22.80
   0 -23   5  161.58   24.70
   0  23  -6  525.75   47.50
   0  23   6  558.64   44.40
   0 -23  -6  544.35   48.80
   0 -23   6  566.74   50.89
   0  23   7   11.80   14.90
   0  23  -7    6.50   20.30
   0 -23  -7   27.30   22.80
   0 -23   7   24.80   25.70
   0  23  -8  187.78   26.80
   0 -23   8  196.18   35.90
   0 -23  -8  184.58   29.20
   0  23  -9   50.39   23.60
   0 -23  -9   38.10   27.10
   0 -23   9   52.79   30.80
   0  24   0  144.59   17.80
   0 -24   0  158.48   21.60
   0  24  -1 1307.27  108.79
   0  24   1 1399.56  104.59
   0 -24   1 1482.15  106.69
   0 -24  -1 1455.95  105.69
   0  24  -2   45.50   15.10
   0  24   2   61.79   13.80
   0 -24  -2   41.40   17.40
   0 -24   2   53.39   20.60
   0  24  -3   -8.60   15.40
   0  24   3   13.80   12.80
   0 -24   3    1.70   20.40
   0 -24  -3  -19.10   16.90
   0  24  -4  541.15   46.70
   0  24   4  579.44   44.30
   0 -24   4  572.24   52.49
   0 -24  -4  517.15   46.90
   0  24   5  147.89   17.90
   0  24  -5  133.99   22.60
   0 -24   5  161.98   25.50
   0 -24  -5  150.58   22.80
   0  24  -6   20.90   19.50
   0  24   6   26.80   14.90
   0 -24  -6   48.60   33.40
   0 -24   6   47.80   23.80
   0  24   7  779.82   61.89
   0  24  -7  733.53   64.59
   0 -24   7  821.72   70.59
   0 -24  -7  829.32   65.69
   0  24  -8   24.00   22.70
   0 -24   8    1.30   28.70
   0 -24  -8   17.00   25.50
   0  24  -9  121.49   26.80
   0 -24  -9  140.49   29.80
   0 -24   9  113.39   36.20
   0  25   0   -0.70   16.00
   0 -25   0  -13.00   18.20
   0  25  -1   22.00   15.20
   0  25   1   38.90   13.20
   0 -25   1   19.20   20.40
   0 -25  -1   17.70   17.30
   0  25   2  409.66   34.70
   0  25  -2  430.76   36.10
   0 -25   2  386.36   41.00
   0 -25  -2  379.76   37.30
   0  25   3   70.49   14.50
   0  25  -3   51.89   17.30
   0 -25  -3   46.20   18.00
   0 -25   3   53.19   22.40
   0  25   4   24.70   13.90
   0  25  -4    5.20   17.60
   0 -25  -4   14.00   18.00
   0 -25   4   14.50   28.00
   0  25   5  140.59   17.50
   0  25  -5  116.09   22.00
   0 -25  -5  125.39   22.60
   0 -25   5  122.99   25.40
   0  25   6  102.29   16.40
   0  25  -6   67.89   21.60
   0 -25   6   80.99   26.10
   0 -25  -6   75.19   24.40
   0  25  -7   22.30   21.80
   0 -25  -7   43.00   24.40
   0 -25   7   37.10   31.70
   0  25  -8   22.40   23.90
   0 -25   8    7.30   30.50
   0 -25  -8   16.30   26.40
   0  25  -9   48.70   26.90
   0 -25  -9   19.90   28.30
   0 -25   9    3.30   43.00
   0  26   0  847.32   64.09
   0 -26   0  824.02   65.39
   0  26   1 1277.37   96.19
   0  26  -1 1293.17   96.09
   0 -26  -1 1274.97   96.69
   0 -26   1 1300.87   98.09
   0  26  -2   48.30   16.70
   0  26   2   60.09   14.30
   0 -26  -2   56.09   18.90
   0 -26   2   40.30   22.60
   0  26  -3  -15.80   17.50
   0  26   3   -2.40   14.10
   0 -26   3   -9.10   22.90
   0 -26  -3  -11.40   18.00
   0  26   4   15.90   14.50
   0  26  -4   -9.70   18.00
   0 -26   4   10.00   24.70
   0 -26  -4    0.20   18.60
   0  26  -5  205.18   26.40
   0  26   5  236.48   26.30
   0 -26   5  227.28   31.20
   0 -26  -5  201.88   26.70
   0  26  -6  211.38   27.20
   0  26   6  208.18   22.40
   0 -26   6  188.78   31.80
   0 -26  -6  218.08   27.90
   0  26  -7  431.86   45.50
   0 -26  -7  435.46   47.60
   0 -26   7  534.85   56.49
   0  26  -8  169.48   28.80
   0 -26   8  199.28   33.90
   0 -26  -8  192.28   30.70
   0 -26  -9  137.09   31.40
   0 -26   9  117.89   38.50
   0  27   0   20.70   15.40
   0 -27   0   20.10   19.40
   0  27   1  248.08   25.80
   0  27  -1  219.18   27.10
   0 -27  -1  249.18   29.70
   0 -27   1  239.68   32.80
   0  27   2  205.68   24.70
   0  27  -2  217.98   24.00
   0 -27  -2  218.58   25.20
   0 -27   2  203.18   28.80
   0  27  -3   -2.30   17.80
   0  27   3   24.00   15.00
   0 -27  -3   -5.20   18.60
   0  27   4   39.30   15.90
   0  27  -4    8.10   19.90
   0 -27   4   22.80   26.40
   0 -27  -4   11.50   19.30
   0  27  -5   44.80   20.80
   0  27   5   78.29   16.40
   0 -27  -5   62.59   23.60
   0 -27   5   39.00   28.30
   0  27   6   60.59   17.30
   0  27  -6    9.30   21.60
   0 -27   6   24.40   29.00
   0 -27  -6   36.20   22.90
   0  27  -7   42.40   24.20
   0 -27  -7   46.40   26.10
   0 -27   7   25.00   35.70
   0  27  -8   33.00   25.10
   0 -27   8   16.90   33.70
   0 -27  -8    1.50   26.70
   0  28   0 1347.57   97.49
   0 -28   0 1256.57   98.59
   0  28  -1  106.99   18.20
   0  28   1   99.59   17.40
   0 -28  -1   69.39   20.70
   0 -28   1   36.00   23.60
   0  28  -2   81.09   19.20
   0  28   2  115.99   18.00
   0 -28   2   47.90   24.80
   0 -28  -2   89.69   20.60
   0  28  -3  123.59   22.50
   0 -28   3  136.39   28.60
   0 -28  -3  135.49   22.30
   0  28  -4   91.89   21.40
   0  28   4  106.89   17.30
   0 -28   4   80.69   28.50
   0 -28  -4   66.19   21.20
   0  28  -5  104.79   23.40
   0  28   5  162.78   19.70
   0 -28  -5  105.39   28.40
   0 -28   5  108.09   31.00
   0  28   6  331.77   31.40
   0  28  -6  228.08   30.30
   0 -28   6  276.37   39.60
   0 -28  -6  215.38   30.80
   0  28  -7   59.69   25.10
   0 -28   7   12.40   32.70
   0 -28  -7   32.70   26.70
   0  28  -8  442.86   50.79
   0 -28  -8  526.25   53.59
   0 -28   8  593.64   62.49
   0  29   0   12.90   17.90
   0 -29   0   22.70   21.20
   0  29   1  215.48   23.10
   0  29  -1  187.08   23.90
   0 -29   1  173.48   27.80
   0 -29  -1  233.28   29.20
   0  29   2   46.20   17.30
   0  29  -2   52.09   19.00
   0 -29  -2   37.30   19.70
   0  29  -3   14.20   20.40
   0  29   3   54.99   17.20
   0 -29  -3   38.70   20.60
   0 -29   3    9.10   26.90
   0  29  -4  -15.90   20.80
   0 -29   4    9.70   31.30
   0 -29  -4    8.90   20.60
   0  29  -5  142.39   25.60
   0  29   5  165.98   20.70
   0 -29  -5  125.39   24.80
   0 -29   5   83.29   33.70
   0  29   6  317.47   30.00
   0  29  -6  179.08   28.20
   0 -29  -6  182.28   29.20
   0 -29   6  180.08   40.10
   0  29  -7   64.69   26.70
   0 -29  -7   24.50   27.10
   0 -29   7   15.00   32.80
   0  30   0  224.98   26.30
   0 -30   0  245.78   32.50
   0  30  -1  113.89   19.90
   0  30   1  103.29   19.20
   0 -30  -1  131.99   22.20
   0 -30   1   32.00   25.70
   0  30  -2   -2.40   19.40
   0  30   2   15.30   17.70
   0 -30   2   -3.00   26.60
   0 -30  -2   35.00   20.20
   0  30   3  646.74   49.70
   0  30  -3  583.04   50.19
   0 -30   3  526.05   56.59
   0 -30  -3  558.04   49.90
   0  30  -4   37.20   22.80
   0  30   4   78.59   18.30
   0 -30   4   -2.40   30.70
   0 -30  -4   47.00   30.20
   0  30   5  384.06   38.70
   0  30  -5  356.46   38.10
   0 -30  -5  274.67   38.30
   0 -30   5  339.77   43.90
   0  30   6  113.29   24.60
   0  30  -6   32.00   23.80
   0 -30  -6   -4.00   31.20
   0 -30   6   -2.60   38.10
   0  30  -7    7.80   26.90
   0 -30  -7  -16.10   27.10
   0 -30   7   -2.60   35.50
   0  31   0   -1.10   19.20
   0 -31   0   25.90   24.00
   0  31   1   -1.70   18.10
   0  31  -1   22.40   19.10
   0 -31  -1   36.40   20.80
   0 -31   1   -1.60   31.10
   0  31  -2   39.60   20.00
   0  31   2   42.10   18.30
   0 -31  -2   47.50   20.80
   0 -31   2  -40.80   28.70
   0  31  -3  170.18   25.30
   0  31   3  183.88   22.90
   0 -31   3   99.19   34.50
   0 -31  -3  180.38   34.90
   0  31  -4   10.50   22.60
   0  31   4   43.80   19.60
   0 -31  -4   19.10   21.60
   0 -31   4  -17.30   32.20
   0  31  -5  167.48   26.60
   0 -31  -5  135.99   26.90
   0 -31   5  141.69   39.40
   0  31  -6  144.49   27.90
   0 -31   6   80.99   42.50
   0 -31  -6  133.89   27.60
   0 -31   7   -8.20   38.60
   0  32   0   65.99   20.70
   0 -32   0   68.49   29.10
   0  32   1   43.00   19.70
   0  32  -1   48.00   20.20
   0 -32   1   18.50   25.90
   0  32  -2  136.29   23.40
   0  32   2  178.08   22.40
   0 -32   2   38.90   31.80
   0  32   3  417.66   37.40
   0  32  -3  386.56   39.00
   0 -32   3  290.37   42.90
   0 -32  -3  351.06   39.30
   0  32   4  892.01   64.59
   0  32  -4  770.52   65.89
   0 -32   4  758.52   76.69
   0 -32  -4  746.43   64.79
   0  32   5  140.09   22.20
   0  32  -5   88.09   26.10
   0 -32   5   25.00   39.20
   0 -32  -5   46.80   25.50
   0  32  -6   21.30   26.10
   0 -32   6  -61.49   42.60
   0 -32  -6  -26.00   26.40
   0  33   0   14.60   20.30
   0 -33   0   38.40   22.70
   0  33  -1   45.70   22.50
   0  33   1   42.80   20.60
   0 -33  -1   82.39   23.00
   0 -33   1   19.50   26.30
   0  33  -2   67.19   23.10
   0  33   2  124.29   22.00
   0 -33  -2   92.79   22.70
   0 -33   2  -18.20   29.30
   0  33   3  120.89   22.40
   0  33  -3   80.59   24.00
   0 -33  -3  117.99   23.80
   0 -33   3   16.40   34.10
   0  33  -4   88.69   26.50
   0  33   4  129.59   22.70
   0 -33  -4  114.09   24.60
   0 -33   4    5.40   39.10
   0  33  -5  120.79   28.90
   0  33   5  213.78   26.40
   0 -33   5   53.69   42.40
   0 -33  -5  124.19   27.80
   0  34   0   19.10   21.50
   0 -34   0   55.89   24.80
   0  34   1   68.99   22.00
   0  34  -1   86.29   24.00
   0 -34   1   14.30   27.00
   0 -34  -1  138.69   24.30
   0  34   2  383.96   39.70
   0  34  -2  305.27   39.30
   0 -34  -2  383.26   38.70
   0  34  -3   69.79   24.70
   0  34   3   43.60   23.30
   0 -34   3 -102.79   36.30
   0 -34  -3   27.40   23.10
   0  34  -4  595.74   53.79
   0  34   4  719.53   53.29
   0 -34   4  445.26   60.59
   0 -34  -4  546.75   51.89
   0  34  -5   49.20   27.40
   0  34   5   95.39   24.10
   0 -34   5  -46.30   47.20
   0  35   0   13.50   22.50
   0 -35   0   73.49   25.50
   0  35  -1  207.68   29.90
   0  35   1  198.98   28.80
   0 -35  -1  344.67   36.60
   0 -35   1  205.18   34.90
   0  35  -2   43.40   25.80
   0  35   2   51.69   24.30
   0 -35  -2   85.39   25.20
   0  35  -3   18.20   25.80
   0  35   3   37.00   23.80
   0 -35  -3   30.20   23.90
   0  35  -4   47.80   27.30
   0  35   4   96.19   23.90
   0 -35   4  -64.69   39.60
   0  36   0  238.78   30.60
   0  36  -1  155.18   27.80
   0  36   1  144.19   27.60
   0 -36   1  119.99   31.60
   0 -36  -1  200.28   28.10
   0  36  -2   75.29   26.00
   0  36   2   92.09   25.30
   0 -36   2  -65.19   33.20
   0 -36   3  -33.70   39.30
   0  37   0   62.79   26.50
   0 -37   0   98.49   28.40
   0  37  -1  128.89   28.40
   0  37   1  146.89   28.80
   0 -37   1  160.08   35.00
   1   0 -12   31.50   25.90
   1   0 -11   -7.50   12.70
   1   0 -11   12.70   21.70
   1   0 -10  871.11   64.69
   1   0 -10  837.72   69.79
   1   0  -9    1.40    9.50
   1   0  -9   23.10   16.80
   1   0  -8  497.45   38.10
   1   0  -7   24.60    7.80
   1   0  -7   35.50   12.10
   1   0  -6 1107.29   84.89
   1   0  -6 1181.18   83.69
   1   0  -5   -9.20    5.50
   1   0  -5   -1.50    9.00
   1   0  -4 1668.13  121.79
   1   0  -3    3.20    6.20
  -1   0   2  143.69   15.30
  -1   0   2  175.08   14.80
   1   0  -2  154.28   14.10
  -1   0  -3   -1.20    4.80
  -1   0  -3   -2.30    6.30
  -1   0  -4  530.05   38.80
  -1   0  -4  506.15   39.60
  -1   0  -5  -15.50    6.40
  -1   0  -5   -1.10    9.20
  -1   0  -6 1506.45  109.09
  -1   0  -6 1481.75  109.99
  -1   0  -7   15.70    8.40
  -1   0  -7   25.50   12.80
  -1   0  -8  342.27   33.20
  -1   0  -8  370.26   29.20
  -1   0  -9   -3.10   10.50
  -1   0  -9  -10.10   16.60
  -1   0 -10   16.70   19.30
  -1   0 -10   -0.10   13.20
  -1   0 -11  -19.30   15.10
  -1   0 -11   -7.40   22.40
  -1   0 -12  286.57   34.40
  -1   0 -12  241.98   28.60
   1   1 -12  105.59   27.90
   1  -1 -12   93.59   28.60
   1   1 -11    5.80   23.00
   1   1 -11  -24.20   13.00
   1  -1 -11   -0.70   21.70
   1  -1 -11   -1.70   14.20
   1   1 -10   43.70   19.40
   1  -1 -10   53.89   19.80
   1  -1 -10   27.90   11.70
   1   1  -9  599.64   45.00
   1   1  -9  578.64   50.09
   1  -1  -9  575.04   49.00
   1  -1  -9  591.74   45.10
   1   1  -8  458.25   51.59
   1   1  -8  539.85   39.80
   1  -1  -8  528.65   39.60
   1   1  -7 3757.12  272.17
   1   1  -7 3721.73  273.17
   1  -1  -7 3796.52  272.07
   1  -1  -7 3732.23  273.07
   1   1  -6  237.38   22.70
   1   1  -6  235.68   19.50
   1  -1  -6  242.28   19.30
   1  -1  -6  218.58   22.60
   1   1  -5  146.99   16.20
   1   1  -5  115.09   12.30
   1  -1  -5  133.99   11.80
   1  -1  -5  138.19   15.90
   1   1  -4  101.69   12.90
   1  -1  -4  102.39   13.10
   1   1  -3  175.78   15.60
   1  -1  -3  174.68   16.00
  -1   1   2   11.00    5.70
  -1   1   2    7.60    5.10
   1   1  -2    5.90    6.10
  -1  -1   2    5.90    6.20
  -1  -1   2    0.50    9.50
   1  -1  -2    8.40    5.20
  -1   1  -2  618.84   46.90
   1  -1   2  647.24   46.80
  -1   1  -3   69.69    7.50
  -1   1  -3   66.99    8.90
  -1  -1  -3   69.49    7.90
  -1  -1  -3   76.39    8.60
  -1   1  -4  106.49   11.60
  -1   1  -4  125.89   13.80
  -1  -1  -4  102.89   13.50
  -1  -1  -4  107.19   11.60
  -1   1  -5  369.86   29.20
  -1   1  -5  384.86   30.80
  -1  -1  -5  389.16   29.00
  -1  -1  -5  364.56   31.10
  -1   1  -6  774.32   57.59
  -1   1  -6  783.22   59.29
  -1  -1  -6  775.12   57.59
  -1  -1  -6  777.32   58.99
  -1   1  -7 1963.50  140.19
  -1   1  -7 1884.21  141.49
  -1  -1  -7 1879.31  141.19
  -1  -1  -7 1964.90  140.19
  -1   1  -8   31.00   15.20
  -1   1  -8   49.60   10.40
  -1  -1  -8   59.89   15.60
  -1  -1  -8   34.20    9.80
  -1   1  -9   36.30   18.00
  -1   1  -9   42.20   11.30
  -1  -1  -9   35.50   17.80
  -1  -1  -9   41.40   11.30
  -1   1 -10  106.19   21.40
  -1   1 -10  113.69   16.20
  -1  -1 -10  110.09   21.80
  -1  -1 -10   93.79   15.40
  -1   1 -11    4.60   21.50
  -1   1 -11  -13.70   14.90
  -1  -1 -11  -13.90   22.30
  -1   1 -12   69.59   26.30
  -1   1 -12   30.70   20.30
  -1  -1 -12   59.49   26.50
   1   2 -12   65.89   26.10
   1  -2 -12   54.69   26.30
   1   2 -11    3.30   13.60
   1   2 -11   -2.10   22.20
   1  -2 -11  -11.40   13.30
   1  -2 -11   -2.40   23.10
   1   2 -10  529.85   40.30
   1   2 -10  462.85   46.70
   1  -2 -10  503.95   39.90
   1  -2 -10  485.75   46.60
   1   2  -9  423.36   38.80
   1   2  -9  425.06   34.40
   1  -2  -9  430.16   33.40
   1  -2  -9  424.06   40.10
   1   2  -8  175.48   17.70
   1   2  -8  181.88   24.80
   1  -2  -8  162.08   16.50
   1   2  -7   69.89   13.80
   1   2  -7   69.79    9.80
   1  -2  -7   81.79    8.90
   1   2  -6  466.35   37.40
   1   2  -6  449.06   34.80
   1  -2  -6  455.65   37.00
   1  -2  -6  464.85   34.50
   1   2  -5  127.89   12.40
   1   2  -5  129.69   15.90
   1  -2  -5  124.09   15.80
   1   2  -4  126.29   14.10
   1   2  -4  132.59   11.70
   1  -2  -4  118.59   14.30
   1   2  -3  226.38   19.00
   1  -2  -3  221.88   19.20
  -1   2   2 1746.53  122.59
   1   2  -2 1681.63  122.79
  -1   2   2 1608.64  122.49
  -1  -2   2 1620.34  122.69
  -1  -2   2 1759.32  122.89
   1  -2  -2 1658.03  122.49
  -1   2   1    2.30    4.00
   1   2  -1    6.50    5.60
  -1  -2   1    3.60    3.90
  -1   2  -1 1948.71  152.28
   1  -2   1 2232.88  152.08
   1  -2   1 2069.49  152.18
  -1   2  -2 1252.57   91.99
  -1   2  -3  164.98   14.50
  -1   2  -3  165.48   15.50
  -1  -2  -3  180.78   15.70
  -1   2  -4  877.51   66.09
  -1   2  -4  891.01   65.39
  -1  -2  -4  939.11   65.39
  -1  -2  -4  862.11   65.99
  -1   2  -5 1428.46  104.19
  -1   2  -5 1418.46  104.89
  -1  -2  -5 1448.16  104.09
  -1  -2  -5 1415.66  104.79
  -1   2  -6  746.03   57.19
  -1   2  -6  750.62   55.79
  -1  -2  -6  733.73   55.49
  -1  -2  -6  773.72   56.99
  -1   2  -7   23.60   13.20
  -1   2  -7    8.60    9.00
  -1  -2  -7    2.90    8.10
  -1  -2  -7   24.90   12.50
  -1   2  -8  255.37   27.10
  -1   2  -8  264.47   22.50
  -1  -2  -8  224.48   26.80
  -1  -2  -8  241.88   22.10
  -1   2  -9  105.59   18.60
  -1   2  -9   76.19   12.90
  -1  -2  -9   90.99   18.80
  -1  -2  -9   77.69   11.90
  -1   2 -10   65.79   16.50
  -1   2 -10   70.39   20.50
  -1  -2 -10   71.89   20.50
  -1  -2 -10   64.29   13.80
  -1   2 -11   35.90   23.30
  -1   2 -11   30.60   14.30
  -1  -2 -11   37.30   24.10
  -1  -2 -11   35.50   16.40
  -1   2 -12  219.88   33.70
  -1   2 -12  259.17   29.70
  -1  -2 -12  271.97   33.60
   1   3 -12  222.98   23.30
   1   3 -12  200.08   33.20
   1  -3 -12  207.98   31.20
   1   3 -11  231.28   29.00
   1   3 -11  244.28   25.30
   1  -3 -11  244.98   29.80
   1   3 -10  206.58   25.20
   1   3 -10  189.58   22.50
   1  -3 -10  235.38   29.80
   1  -3 -10  189.98   20.60
   1   3  -9   18.00   16.70
   1   3  -9   16.00   10.50
   1  -3  -9    5.60    8.80
   1  -3  -9   25.90   17.30
   1   3  -8 1349.56  101.39
   1   3  -8 1360.26   98.79
   1  -3  -8 1335.17   98.39
   1   3  -7  500.65   39.80
   1   3  -7  490.85   37.40
   1  -3  -7  485.95   36.70
   1  -3  -7  469.25   39.80
   1   3  -6  423.96   34.60
   1   3  -6  407.56   32.40
   1  -3  -6  436.06   31.90
   1  -3  -6  423.66   34.60
   1   3  -5  204.58   18.00
   1   3  -5  220.18   21.10
   1  -3  -5  221.68   20.50
   1   3  -4 1554.94  114.79
   1   3  -4 1615.44  114.29
   1  -3  -4 1543.45  114.79
   1   3  -3 1491.75  107.09
   1  -3  -3 1444.36  107.09
  -1   3   2 2556.34  180.88
   1   3  -2 2380.86  181.08
  -1   3   2 2529.45  180.88
  -1  -3   2 2365.86  180.88
  -1  -3   2 2509.35  181.08
   1  -3  -2 2550.24  180.88
  -1   3   1 2915.61  218.18
   1   3  -1 3079.09  218.28
   1  -3  -1 3101.69  218.18
  -1  -3   1 2925.51  218.18
  -1   3   0 1114.69   76.39
   1  -3   0  962.80   75.89
  -1   3  -1    5.20    8.00
   1   3   1   19.70    4.60
   1   3   1   14.50    6.00
   1  -3   1   10.00    9.70
  -1  -3  -1   22.30    4.70
   1  -3   1   13.00    7.20
  -1   3  -2 2661.63  193.68
  -1   3  -2 2670.53  193.68
  -1   3  -3 1655.53  120.39
  -1   3  -3 1663.43  120.09
  -1  -3  -3 1639.14  120.39
  -1   3  -4  528.55   39.90
  -1   3  -4  527.35   40.80
  -1  -3  -4  525.25   40.90
  -1  -3  -4  561.24   39.70
  -1   3  -5  325.07   26.00
  -1   3  -5  325.77   27.50
  -1  -3  -5  327.97   25.50
  -1  -3  -5  323.87   27.30
  -1   3  -6 1722.53  126.19
  -1   3  -6 1727.13  125.39
  -1  -3  -6 1711.03  125.19
  -1  -3  -6 1717.13  126.29
  -1   3  -7  179.48   22.60
  -1   3  -7  185.68   18.00
  -1  -3  -7  177.78   17.10
  -1  -3  -7  166.68   21.70
  -1   3  -8  603.14   45.50
  -1   3  -8  586.04   49.10
  -1  -3  -8  599.34   48.00
  -1  -3  -8  585.64   45.10
  -1   3  -9   39.50   16.90
  -1   3  -9   25.80   11.90
  -1  -3  -9   27.40   10.40
  -1  -3  -9   42.80   17.30
  -1   3 -10  306.87   29.10
  -1   3 -10  245.88   33.70
  -1  -3 -10  260.27   33.30
  -1  -3 -10  250.07   25.40
  -1   3 -11  282.47   37.80
  -1   3 -11  286.97   33.20
  -1  -3 -11  317.47   29.90
  -1  -3 -11  294.27   33.30
  -1   3 -12  169.88   23.90
  -1   3 -12  128.79   32.60
  -1  -3 -12  140.19   30.00
   1   4 -12   88.29   17.90
   1   4 -12   72.59   26.80
   1  -4 -12   96.49   27.10
   1   4 -11   56.39   22.40
   1  -4 -11   20.20   22.80
   1   4 -10  205.28   23.20
   1   4 -10  183.58   25.10
   1  -4 -10  180.58   20.20
   1  -4 -10  224.08   25.30
   1   4  -9  148.69   20.50
   1   4  -9  149.69   15.50
   1  -4  -9  130.99   21.40
   1  -4  -9  134.59   15.30
   1   4  -8  149.29   18.70
   1   4  -8  137.89   14.20
   1  -4  -8  116.09   13.90
   1   4  -7   23.00   12.00
   1   4  -7    4.00    8.40
   1  -4  -7   15.50    6.30
   1  -4  -7   10.10   13.10
   1   4  -6  427.66   34.40
   1   4  -6  431.36   32.50
   1  -4  -6  411.06   31.40
   1  -4  -6  409.96   35.10
   1   4  -5    9.60    9.30
   1   4  -5    4.20    6.90
   1  -4  -5    3.60   10.00
   1   4  -4  509.85   36.60
   1   4  -4  472.45   37.60
   1  -4  -4  489.55   37.70
   1   4  -3  111.49   12.30
   1   4  -3  117.69   11.30
   1  -4  -3  115.49   13.10
  -1   4   2 2237.28  162.78
   1   4  -2 2325.87  163.08
  -1   4   2 2132.59  162.68
  -1  -4   2 2231.38  162.98
  -1  -4   2 2182.88  162.88
   1  -4  -2 2255.97  162.78
   1   4  -1  772.92   54.29
  -1   4   1  670.53   53.89
  -1   4   1  709.13   53.99
   1  -4  -1  731.53   53.99
  -1  -4   1  749.23   54.19
   1   4   0 2853.11  205.68
  -1   4   0 2726.73  205.78
  -1  -4   0 2892.21  205.68
   1  -4   0 2850.31  205.78
   1   4   1    9.30    5.60
  -1   4  -1   -1.40    9.20
   1   4   1    2.00    7.40
  -1  -4  -1    9.50    5.90
  -1  -4  -1    1.50    8.10
   1  -4   1   10.60    8.90
   1  -4   1    5.50    8.60
  -1   4  -2 3757.92  272.37
  -1   4  -3    2.50    6.70
  -1   4  -3    3.50    5.20
  -1  -4  -3   18.70    6.60
  -1   4  -4   -2.10    6.20
  -1   4  -4   12.90    8.10
  -1  -4  -4    9.50    5.40
  -1  -4  -4    6.80    7.80
  -1   4  -5  483.75   36.50
  -1   4  -5  487.75   37.90
  -1  -4  -5  473.05   36.20
  -1  -4  -5  483.65   38.10
  -1   4  -6   63.09    9.90
  -1   4  -6   78.79   12.40
  -1  -4  -6   68.09    8.50
  -1  -4  -6   60.89   12.60
  -1   4  -7  155.88   17.60
  -1   4  -7  140.69   16.60
  -1  -4  -7  151.58   20.20
  -1  -4  -7  132.69   14.90
  -1   4  -8  179.48   18.80
  -1   4  -8  169.18   19.90
  -1  -4  -8  149.19   16.90
  -1   4  -9   21.60   17.00
  -1   4  -9   -6.20   11.10
  -1  -4  -9   -0.10    9.80
  -1  -4  -9    6.00   16.70
  -1   4 -10  724.03   54.49
  -1   4 -10  702.33   59.89
  -1  -4 -10  674.43   59.39
  -1  -4 -10  698.03   54.19
  -1   4 -11   74.59   23.30
  -1   4 -11   41.90   15.80
  -1  -4 -11   49.50   23.30
  -1  -4 -11   29.30   15.10
  -1   4 -12  170.28   30.90
  -1   4 -12  180.98   22.10
  -1  -4 -12  171.08   30.70
   1   5 -12    6.10   16.10
   1   5 -12    5.10   26.00
   1  -5 -12    8.70   26.30
   1   5 -11  925.21   74.09
   1   5 -11  909.21   68.99
   1  -5 -11  901.41   73.79
   1   5 -10   93.19   14.40
   1   5 -10   83.99   21.00
   1  -5 -10   96.19   11.80
   1  -5 -10   90.69   22.10
   1   5  -9  101.09   19.70
   1   5  -9  110.29   13.60
   1  -5  -9   82.99   13.70
   1  -5  -9  115.19   20.00
   1   5  -8   73.89   16.00
   1   5  -8   80.69   11.10
   1  -5  -8   52.39    8.40
   1   5  -7   24.10    8.90
   1   5  -7   11.50   12.70
   1  -5  -7   21.60    6.20
   1  -5  -7   28.90   13.40
   1   5  -6  226.68   21.80
   1   5  -6  195.18   18.00
   1  -5  -6  175.68   17.60
   1  -5  -6  192.08   20.90
   1   5  -5 2012.90  149.59
   1   5  -5 2093.19  149.09
   1  -5  -5 2042.10  149.79
   1   5  -4   17.80    8.20
   1   5  -4   12.30    6.70
   1  -5  -4   21.80    8.70
   1   5  -3 3224.28  233.88
   1   5  -3 3284.67  233.68
   1  -5  -3 3156.58  233.88
   1   5  -2  242.08   20.00
  -1   5   1  266.67   23.10
  -1   5   1  260.47   22.70
   1   5  -1  309.27   23.70
   1   5  -1  283.27   23.60
   1  -5  -1  283.57   23.30
  -1  -5   1  287.27   24.00
  -1  -5   1  290.57   23.50
   1  -5  -1  225.68   22.60
  -1   5   0  742.93   57.69
   1   5   0  755.72   57.39
   1   5   0  824.92   57.69
  -1   5   0  744.83   57.99
  -1  -5   0  760.32   57.39
   1  -5   0  774.42   57.69
   1  -5   0  757.02   57.89
  -1   5  -1  719.03   57.29
   1   5   1  701.73   56.09
  -1  -5  -1  752.32   56.49
   1  -5   1  651.03   56.99
   1  -5   1  891.51   56.89
  -1   5  -2  203.78   16.40
  -1   5  -3 4219.58  301.97
  -1   5  -3 4187.28  301.67
  -1  -5  -3 4077.79  301.77
  -1   5  -4  -16.40    6.30
  -1   5  -4    0.70    8.50
  -1  -5  -4    0.10    5.40
  -1  -5  -4   -2.30    7.90
  -1   5  -5 1182.98   86.29
  -1   5  -5 1162.48   86.89
  -1  -5  -5 1187.18   85.89
  -1  -5  -5 1174.38   86.89
  -1   5  -6  158.68   19.00
  -1   5  -6  155.48   16.20
  -1  -5  -6  157.58   14.70
  -1  -5  -6  143.89   18.70
  -1   5  -7   58.39   10.40
  -1   5  -7   44.70   13.50
  -1  -5  -7   63.09   13.60
  -1  -5  -7   43.40    8.20
  -1   5  -8  600.34   45.10
  -1   5  -8  601.14   47.80
  -1  -5  -8  547.25   44.00
  -1  -5  -8  590.14   48.50
  -1   5  -9  501.15   43.60
  -1   5  -9  502.55   39.70
  -1  -5  -9  482.15   43.60
  -1  -5  -9  482.65   38.90
  -1   5 -10   41.00   20.30
  -1   5 -10   37.10   13.70
  -1  -5 -10   42.90   20.70
  -1  -5 -10   11.20   14.70
  -1   5 -11  800.92   60.79
  -1   5 -11  754.22   67.09
  -1  -5 -11  770.32   65.49
  -1  -5 -11  774.52   59.59
  -1   5 -12   13.90   27.30
  -1   5 -12    0.00   17.10
  -1  -5 -12   14.20   26.80
   1   6 -12  134.69   30.60
   1   6 -12  141.99   21.10
   1  -6 -12  165.68   30.30
   1   6 -11   91.49   17.30
   1   6 -11  109.19   24.90
   1  -6 -11   87.19   24.70
   1   6 -10   61.19   20.20
   1   6 -10   70.79   14.20
   1  -6 -10   40.80   20.00
   1  -6 -10   45.90   10.30
   1   6  -9  144.59   16.00
   1   6  -9  138.79   21.60
   1  -6  -9  145.79   15.60
   1  -6  -9  148.49   21.80
   1   6  -8   32.20   14.90
   1   6  -8   26.30   10.40
   1  -6  -8   21.30    7.20
   1   6  -7   -9.20    9.00
   1   6  -7   -4.20   12.70
   1  -6  -7    4.90   12.80
   1  -6  -7   -1.20    5.90
   1   6  -6 1620.84  114.89
   1   6  -6 1566.34  115.69
   1  -6  -6 1532.45  115.69
   1   6  -5  624.34   47.00
   1   6  -5  628.64   46.10
   1  -6  -5  590.54   47.10
   1   6  -4   95.19   11.40
   1   6  -4  105.89   10.50
   1  -6  -4   95.39   11.80
   1   6  -3  142.19   13.30
   1   6  -3  134.29   13.80
   1  -6  -3  117.49   14.30
   1   6  -2  336.07   26.90
   1  -6  -2  361.66   27.10
  -1   6   1 1934.51  140.99
   1   6  -1 1935.21  141.39
  -1   6   1 1955.60  141.09
   1   6  -1 2004.00  141.29
  -1  -6   1 1932.81  141.29
  -1  -6   1 1941.11  141.39
   1  -6  -1 1913.31  141.19
   1  -6  -1 1830.22  140.99
  -1   6   0  390.56   33.30
   1   6   0  451.35   33.40
  -1   6   0  381.66   33.40
   1   6   0  397.16   32.70
   1  -6   0  421.16   33.60
   1  -6   0  407.16   33.70
  -1  -6   0  402.46   32.90
  -1   6  -1 6046.59  437.96
  -1   6  -2 2400.46  171.38
   1  -6   2 2323.07  171.68
  -1   6  -3   -3.70    5.90
   1   6   3   11.60    4.50
  -1  -6  -3    2.50    7.10
  -1   6  -4   48.50    9.90
  -1   6  -4   33.20    7.80
  -1  -6  -4   51.09    9.40
  -1  -6  -4   59.39    6.70
  -1   6  -5   12.10    7.70
  -1   6  -5   25.60    9.90
  -1  -6  -5   18.80    9.80
  -1  -6  -5   13.70    6.20
  -1   6  -6  142.79   16.10
  -1   6  -6  140.19   13.50
  -1  -6  -6  117.59   13.60
  -1  -6  -6  138.69   18.00
  -1   6  -7  218.68   20.20
  -1   6  -7  222.38   24.00
  -1  -6  -7  205.98   18.90
  -1  -6  -7  229.88   24.90
  -1   6  -8  443.26   37.60
  -1   6  -8  428.56   34.50
  -1  -6  -8  396.66   40.90
  -1  -6  -8  416.36   33.00
  -1   6  -9  391.06   38.80
  -1  -6  -9  388.56   37.90
  -1  -6  -9  360.26   30.50
  -1   6 -10  529.25   44.00
  -1   6 -10  513.95   52.29
  -1  -6 -10  511.15   45.40
  -1  -6 -10  600.54   49.50
  -1   6 -11   13.30   15.40
  -1   6 -11   38.80   23.90
  -1  -6 -11   46.40   23.50
  -1   6 -12   77.39   17.90
  -1   6 -12   70.09   27.30
  -1  -6 -12   54.99   27.70
   1   7 -12  435.26   48.30
   1   7 -12  367.36   39.30
   1  -7 -12  399.96   47.20
   1   7 -11  684.73   56.39
   1   7 -11  599.14   51.39
   1  -7 -11  591.54   57.79
   1   7 -10  185.58   26.60
   1  -7 -10  232.58   27.00
   1   7  -9   36.70   12.20
   1   7  -9   38.00   17.40
   1  -7  -9   41.10   17.60
   1  -7  -9   43.60    9.00
   1   7  -8   33.70   15.10
   1   7  -8   22.80   10.80
   1  -7  -8   25.70   21.20
   1  -7  -8   16.30    7.10
   1   7  -7   46.20   10.50
   1   7  -7   39.70   13.20
   1  -7  -7   45.60   14.20
   1   7  -6  383.76   31.80
   1   7  -6  368.96   29.80
   1  -7  -6  373.56   32.00
   1   7  -5 1326.67   93.99
   1   7  -5 1263.47   94.39
   1  -7  -5 1255.17   94.69
   1   7  -4 4054.59  280.57
   1   7  -4 3786.52  280.77
   1  -7  -4 3763.42  280.77
   1   7  -3 1820.22  127.79
   1   7  -3 1717.43  127.89
   1  -7  -3 1727.93  127.99
   1   7  -2  808.12   60.89
   1   7  -2  804.42   61.29
   1  -7  -2  874.31   61.29
   1   7  -1 1251.67   91.19
  -1   7   0    9.50   10.70
  -1   7   0    7.20   10.00
   1   7   0   15.00    9.40
   1   7   0   17.30   10.70
   1  -7   0   12.40   11.00
  -1  -7   0   14.20    9.60
  -1  -7   0   10.80   10.20
   1  -7   0    9.40   11.00
  -1   7  -1    1.10    5.20
   1  -7   1   10.50    6.90
  -1   7  -2 2847.62  203.98
   1  -7   2 2775.12  204.28
   1   7   3 2832.92  203.08
  -1   7  -3 2791.12  203.38
  -1  -7  -3 2778.62  203.38
  -1   7  -4 1303.77   96.19
  -1   7  -4 1288.07   95.59
  -1  -7  -4 1332.97   95.99
  -1   7  -5  733.13   54.79
  -1   7  -5  715.73   53.69
  -1  -7  -5  714.73   54.59
  -1   7  -6  232.58   20.00
  -1   7  -6  197.78   22.80
  -1  -7  -6  223.38   18.70
  -1  -7  -6  221.08   22.20
  -1   7  -7   95.49   12.00
  -1   7  -7   72.49   15.10
  -1  -7  -7   83.69   15.10
  -1  -7  -7   83.79   10.10
  -1   7  -8   15.00   10.70
  -1   7  -8   33.90   15.40
  -1  -7  -8   17.50   17.00
  -1  -7  -8   -0.60    8.50
  -1   7  -9  623.24   50.69
  -1   7  -9  593.44   47.30
  -1  -7  -9  603.24   50.39
  -1  -7  -9  584.14   45.90
  -1   7 -10  377.96   35.50
  -1   7 -10  432.36   41.40
  -1  -7 -10  361.36   34.80
  -1  -7 -10  440.86   40.70
  -1   7 -11  303.57   32.30
  -1   7 -11  350.76   41.20
  -1  -7 -11  326.47   40.20
  -1   7 -12  123.79   31.40
  -1   7 -12  130.49   21.00
  -1  -7 -12  172.98   30.10
   1   8 -12  114.39   31.20
   1   8 -12  122.69   21.70
   1  -8 -12  148.79   30.10
   1   8 -11    9.20   16.10
   1   8 -11   30.70   23.10
   1  -8 -11   11.80   25.60
   1   8 -10  134.19   22.40
   1   8 -10  125.79   17.40
   1  -8 -10  113.69   23.30
   1   8  -9    8.40   17.30
   1   8  -9   11.90   12.30
   1  -8  -9    5.90   17.60
   1   8  -8   38.40   15.20
   1   8  -8   63.29   12.20
   1  -8  -8   60.59   20.10
   1   8  -7  547.55   45.40
   1   8  -7  571.24   43.30
   1  -8  -7  553.64   45.60
   1   8  -6 1923.91  136.79
   1   8  -6 1868.91  137.49
   1  -8  -6 1828.92  137.39
   1   8  -5 1503.65  112.59
   1   8  -5 1596.14  112.09
   1  -8  -5 1499.35  112.59
   1   8  -4  590.14   45.00
   1   8  -4  618.04   44.40
   1  -8  -4  558.74   45.20
   1   8  -3   31.60    7.90
   1   8  -3   41.60    7.80
   1  -8  -3   45.30    9.10
   1   8  -2  112.99   12.70
   1  -8  -2  121.19   14.00
   1   8  -1   48.60    7.90
  -1   8   0   89.59   11.90
   1   8   0  133.79   11.70
   1  -8   0  159.58   15.10
   1   8   1 1236.38   91.59
  -1   8  -1 1341.97   91.89
   1  -8   1 1200.58   92.09
   1   8   2  799.02   58.49
  -1   8  -2  818.82   58.89
   1  -8   2  783.12   59.39
   1   8   3  122.09   11.70
   1  -8   3  170.28   15.90
  -1  -8  -3  113.69   14.00
   1   8   4    1.90    5.40
  -1   8  -4   -5.80    7.60
  -1  -8  -4   14.70    9.20
  -1   8  -5    9.30   10.40
  -1   8  -5    8.80    8.30
  -1  -8  -5    4.50   10.40
  -1   8  -6  869.51   63.99
  -1   8  -6  856.01   65.29
  -1  -8  -6  845.82   64.59
  -1   8  -7   45.40   22.00
  -1   8  -7   43.90   10.90
  -1  -8  -7   56.89   14.40
  -1   8  -8  527.55   44.90
  -1   8  -8  518.65   40.40
  -1  -8  -8  489.45   45.10
  -1   8  -9  516.55   43.20
  -1   8  -9  540.95   47.00
  -1  -8  -9  549.15   46.40
  -1   8 -10   51.89   23.70
  -1   8 -10   56.89   15.60
  -1  -8 -10   55.69   21.60
  -1   8 -11   58.89   25.70
  -1   8 -11   32.00   17.10
  -1  -8 -11   61.39   24.00
  -1   8 -12   30.20   29.90
  -1   8 -12   34.60   18.30
  -1  -8 -12   40.60   27.20
   1   9 -12  275.27   37.30
   1   9 -12  289.27   31.40
   1  -9 -12  324.27   42.50
   1   9 -11   35.40   23.70
   1   9 -11   38.70   15.50
   1  -9 -11   34.70   25.10
   1   9 -10  678.43   54.89
   1   9 -10  644.74   50.79
   1  -9 -10  594.24   56.09
   1   9  -9  182.58   22.00
   1   9  -9  210.08   28.30
  -1   9   9  221.78   19.70
   1  -9  -9  191.28   25.70
   1   9  -8   39.90   15.60
   1   9  -8   38.60   12.40
  -1   9   8   43.70    8.30
   1  -9  -8   42.20   17.10
   1   9  -7  898.01   70.19
   1   9  -7  902.71   68.79
  -1   9   7  969.70   67.69
   1  -9  -7  916.61   70.29
   1   9  -6 1421.56  106.39
   1   9  -6 1462.75  105.69
   1  -9  -6 1442.26  106.49
   1   9  -5   20.70   10.20
   1   9  -5    0.60    9.00
   1  -9  -5   13.80   11.00
   1   9  -4 3477.65  247.18
   1   9  -4 3374.26  247.28
   1  -9  -4 3359.76  247.38
   1   9  -3   24.70    8.30
   1   9  -3   41.20    8.10
   1  -9  -3   29.00    9.40
   1   9  -2  642.04   49.10
  -1  -9   2  660.73   49.30
   1  -9  -2  680.33   49.70
   1   9  -1  852.91   64.59
   1  -9  -1  898.51   65.09
  -1   9   0  111.89   12.10
   1   9   0  135.79   12.40
   1  -9   0  140.19   15.60
  -1   9  -1 1366.16   90.99
   1   9   1 1200.68   90.69
   1  -9   1 1173.58   91.29
  -1   9  -2 3262.87  227.88
   1   9   2 3062.19  227.68
   1  -9   2 3097.89  228.18
   1   9   3  139.59   12.30
  -1   9  -3  132.59   14.00
   1  -9   3  130.29   16.30
  -1  -9  -3  126.79   14.80
  -1   9  -4 3490.95  251.47
   1   9   4 3534.15  251.07
  -1  -9  -4 3364.96  251.57
  -1   9  -5  137.19   15.80
   1   9   5  151.98   13.80
  -1  -9  -5  133.49   17.80
  -1   9  -6   12.20   11.80
   1   9   6    8.70    6.80
  -1   9  -6    5.60    9.40
  -1  -9  -6    9.90   11.90
  -1   9  -7  745.33   54.79
  -1   9  -7  657.63   62.59
  -1  -9  -7  743.03   56.69
  -1   9  -8  125.19   19.20
  -1   9  -8  122.69   17.20
  -1  -9  -8  119.89   19.70
  -1   9  -9   78.29   20.00
  -1   9  -9   65.79   14.60
  -1  -9  -9   66.19   19.70
  -1   9 -10  433.16   38.90
  -1   9 -10  474.45   44.80
  -1  -9 -10  446.76   43.60
  -1   9 -11   13.00   16.40
  -1   9 -11   14.30   24.00
  -1  -9 -11   25.40   24.10
  -1   9 -12  241.48   35.50
  -1  -9 -12  273.37   35.10
   1  10 -12   10.20   17.40
   1  10 -12   10.80   28.20
   1 -10 -12   10.30   27.30
   1  10 -11   23.90   16.00
   1  10 -11   17.30   23.50
   1 -10 -11   17.60   25.30
   1  10 -10  244.98   28.90
   1  10 -10  314.37   37.50
   1 -10 -10  317.77   37.60
  -1  10   9  387.26   30.40
   1  10  -9  378.76   36.40
   1  10  -9  325.27   32.60
   1 -10  -9  352.76   38.20
   1  10  -8   88.09   17.50
   1  10  -8   91.99   13.80
  -1  10   8   92.49   10.60
   1 -10  -8   76.89   18.50
   1  10  -7 1166.58   90.79
  -1  10   7 1277.07   88.69
   1  10  -7 1232.58   89.99
   1 -10  -7 1175.18   91.39
   1  10  -6  153.28   20.20
   1  10  -6  154.28   18.90
   1 -10  -6  188.58   21.90
   1  10  -5  705.83   54.99
   1  10  -5  760.12   54.29
   1 -10  -5  698.63   54.89
   1  10  -4   98.19   12.10
   1  10  -4  104.09   12.40
   1 -10  -4   97.89   13.30
   1  10  -3  302.27   26.00
   1 -10  -3  333.27   26.80
   1  10  -2 1504.35  111.49
  -1 -10   2 1465.85  111.49
   1 -10  -2 1614.04  111.79
  -1  10   1    5.20    5.80
   1  10  -1    9.20    7.70
   1 -10  -1   23.20    9.50
  -1  10   0  307.27   25.30
   1  10   0  325.47   25.30
   1 -10   0  347.37   27.30
  -1  10  -1  381.56   28.50
   1  10   1  366.46   27.80
   1 -10   1  357.86   29.80
  -1  10  -2  131.09   14.60
   1  10   2  153.18   12.60
  -1 -10  -2  131.89   14.20
   1 -10   2  142.09   15.80
  -1  10  -3  541.05   39.90
   1  10   3  545.15   39.00
  -1 -10  -3  501.65   39.90
   1 -10   3  509.85   40.80
  -1  10  -4  562.64   42.00
   1  10   4  546.75   40.90
  -1 -10  -4  542.75   42.40
   1 -10   4  543.35   43.70
  -1  10  -5  949.40   68.99
   1  10   5  932.71   68.09
  -1 -10  -5  900.81   69.39
  -1  10  -6  816.52   61.09
   1  10   6  814.52   60.19
  -1 -10  -6  817.82   62.39
  -1  10  -7  213.08   24.80
  -1  10  -7  206.58   21.00
   1  10   7  206.38   18.90
  -1 -10  -7  205.28   25.00
   1  10   8   58.39   10.00
  -1  10  -8   53.89   13.90
  -1  10  -8   42.50   17.30
  -1 -10  -8   44.20   17.60
   1  10   9  289.37   23.90
  -1  10  -9  211.98   26.40
  -1  10  -9  254.97   31.60
  -1 -10  -9  233.08   28.00
  -1  10 -10  -11.70   14.10
   1  10  10    5.90   15.60
  -1  10 -10   -1.70   23.70
  -1 -10 -10  -12.50   20.70
  -1  10 -11    3.00   24.40
  -1  10 -11    5.50   17.10
  -1 -10 -11   -4.70   24.50
   1  11 -12   59.19   18.70
   1  11 -12   56.29   31.90
   1 -11 -12   54.39   29.70
   1  11 -11   28.20   17.00
   1  11 -11   27.90   25.50
   1 -11 -11   38.70   26.10
   1  11 -10   57.99   16.10
   1  11 -10   71.29   23.30
   1 -11 -10   88.09   23.70
  -1  11   9  767.32   55.19
   1  11  -9  691.43   56.19
   1  11  -9  744.93   59.59
   1 -11  -9  708.43   59.59
   1  11  -8  611.84   51.19
   1  11  -8  663.23   54.59
  -1  11   8  700.63   49.00
   1 -11  -8  627.74   53.89
  -1  11   7 1122.09   78.99
   1  11  -7 1039.10   81.79
   1  11  -7 1081.69   80.29
   1 -11  -7 1066.49   81.59
   1  11  -6  148.79   17.30
   1  11  -6  156.68   17.60
   1 -11  -6  137.99   18.40
   1  11  -5  530.45   42.00
   1  11  -5  516.45   42.70
   1 -11  -5  577.04   42.70
   1  11  -4  957.30   70.59
   1 -11  -4  945.81   71.09
   1  11  -3   -9.70    9.40
   1 -11  -3    1.90   10.10
  -1  11   2   81.29    8.00
   1  11  -2   65.39   10.10
   1 -11  -2   48.60   11.50
  -1 -11   2   58.39    9.50
  -1  11   1 6176.58  463.25
   1  11  -1 6385.46  463.45
   1 -11  -1 6924.61  463.75
  -1 -11   1 6096.79  463.65
   1  11   0  512.45   38.70
  -1  11   0  502.35   38.60
   1 -11   0  521.25   39.90
  -1  11  -1 1222.68   84.29
   1  11   1 1137.79   83.99
   1 -11   1 1089.79   84.79
  -1  11  -2  461.85   35.30
   1  11   2  493.35   34.30
  -1 -11  -2  455.85   35.00
   1 -11   2  410.36   35.90
  -1  11  -3   10.60    8.50
   1  11   3   33.70    6.10
   1 -11   3   16.90   10.90
  -1 -11  -3   11.50    8.80
  -1  11  -4  921.61   64.89
   1  11   4  906.11   63.99
   1 -11   4  810.12   65.69
  -1 -11  -4  844.02   64.89
   1  11   5 1455.15  106.89
  -1  11  -5 1503.25  107.59
  -1 -11  -5 1442.86  107.99
   1  11   6  411.96   31.30
  -1  11  -6  414.56   33.50
  -1 -11  -6  384.26   34.80
   1  11   7 1007.80   72.79
  -1  11  -7  996.80   73.79
  -1 -11  -7  954.00   75.29
  -1  11  -8   89.09   14.70
   1  11   8   99.99   11.80
  -1 -11  -8   69.49   18.70
  -1  11  -9  716.63   55.09
   1  11   9  718.63   53.89
  -1 -11  -9  652.73   58.19
   1  11  10   48.00   16.00
  -1  11 -10   34.10   15.90
  -1 -11 -10   40.70   22.10
  -1  11 -11   12.40   17.10
  -1 -11 -11   25.80   25.10
   1  12 -12  -17.80   30.10
   1  12 -12   -1.50   18.60
   1 -12 -12  -20.60   30.30
   1  12 -11   58.89   17.70
   1  12 -11   67.09   26.20
   1 -12 -11   11.80   27.20
   1  12 -10  146.39   20.00
   1  12 -10  166.88   25.50
   1 -12 -10  143.89   26.80
   1  12  -9  385.66   40.80
   1  12  -9  369.56   34.30
   1 -12  -9  379.46   38.40
  -1  12   8   26.70    8.80
   1  12  -8   50.09   17.70
   1 -12  -8   42.90   17.50
   1  12  -7  232.98   23.00
  -1  12   7  210.88   18.90
   1  12  -7  236.98   26.70
   1 -12  -7  227.48   27.50
   1  12  -6   -4.80   11.10
   1  12  -6    3.20   11.90
   1 -12  -6   -4.30   13.80
   1  12  -5   95.49   13.10
   1  12  -5   80.69   13.30
   1 -12  -5   96.89   14.50
   1  12  -4  144.89   15.10
   1 -12  -4  136.59   18.80
   1  12  -3  627.64   51.89
  -1  12   3  743.83   50.99
  -1 -12   3  671.83   52.29
   1 -12  -3  703.23   52.49
   1  12  -2 3354.66  250.27
  -1  12   2 3459.75  249.88
   1 -12  -2 3581.54  250.47
  -1 -12   2 3389.16  250.17
   1  12  -1  605.04   44.30
  -1  12   1  567.04   43.70
   1 -12  -1  604.64   45.30
  -1 -12   1  568.04   44.20
   1  12   0   15.30    7.60
  -1  12   0  -11.60    7.10
  -1  12  -1   22.60    8.40
   1  12   1   54.09    7.50
   1 -12   1   43.00   10.90
  -1  12  -2   89.09   11.50
   1 -12   2   79.59   12.50
  -1 -12  -2   97.59   11.00
  -1  12  -3  108.79   12.60
   1  12   3  132.19   11.40
   1 -12   3   74.59   13.70
  -1 -12  -3  106.99   12.60
   1  12   4  876.61   63.19
  -1  12  -4  894.21   64.19
  -1 -12  -4  842.72   64.39
   1 -12   4  821.52   64.89
   1  12   5 1656.03  120.29
  -1  12  -5 1683.73  120.99
   1 -12   5 1618.14  121.99
  -1 -12  -5 1645.04  121.39
  -1  12  -6  167.28   16.60
   1  12   6  133.69   15.10
  -1 -12  -6  150.38   17.80
  -1  12  -7   58.89   19.80
   1  12   7   49.99    9.80
  -1 -12  -7   72.09   16.00
  -1  12  -8   40.90   14.00
   1  12   8   41.20   11.10
  -1 -12  -8   44.50   17.40
   1  12   9  180.48   19.20
  -1  12  -9  172.88   20.30
  -1 -12  -9  194.38   25.00
  -1  12 -10   36.10   15.80
  -1 -12 -10   69.39   22.30
  -1  12 -11   20.50   18.00
  -1 -12 -11   37.50   25.90
   1  13 -12   -7.90   33.50
   1 -13 -12   37.20   29.80
   1  13 -11   19.80   17.80
   1  13 -11    7.60   27.30
   1 -13 -11    0.80   26.10
   1  13 -10  251.37   29.60
   1  13 -10  264.27   35.60
   1 -13 -10  260.87   32.20
   1  13  -9  205.18   22.70
   1  13  -9  196.48   28.40
   1 -13  -9  234.28   27.10
   1  13  -8  998.60   78.79
   1  13  -8  983.20   76.69
  -1  13   8 1029.20   74.39
   1 -13  -8 1030.10   77.99
   1  13  -7  262.37   23.50
  -1  13   7  198.98   18.50
   1 -13  -7  224.98   27.30
   1  13  -6  980.90   71.39
  -1  13   6  883.61   69.19
   1  13  -6  980.20   71.19
   1 -13  -6  955.30   72.19
   1  13  -5    0.10   11.10
  -1  13   5   -1.60    6.00
   1 -13  -5   -3.70   13.10
  -1  13   4   37.20    6.60
   1  13  -4   -1.80   10.30
  -1 -13   4   15.90   11.70
   1 -13  -4   11.10   11.90
   1  13  -3   16.40   10.70
  -1  13   3   61.39    8.20
  -1 -13   3   41.60   10.80
   1 -13  -3   25.60   11.80
   1  13  -2 1463.55  109.59
  -1  13   2 1505.55  109.09
   1 -13  -2 1533.25  110.09
  -1 -13   2 1485.15  109.59
   1  13  -1 2152.88  152.98
  -1  13   1 2038.90  152.68
   1 -13  -1 2137.29  153.38
  -1 -13   1 2069.09  152.98
  -1  13   0 4339.67  325.97
   1  13   0 4244.08  325.97
  -1 -13   0 4866.81  326.17
   1 -13   0 4528.75  326.37
  -1  13  -1   27.80    8.90
   1 -13   1   56.69   12.00
  -1  13  -2  -16.00    9.30
   1  13   2   36.40    6.90
   1 -13   2   18.60   10.60
  -1 -13  -2  -11.30    9.00
   1  13   3   62.29    7.40
  -1  13  -3   26.80   10.40
   1 -13   3   30.30   12.00
  -1 -13  -3   46.50   10.50
   1  13   4  289.07   22.30
  -1  13  -4  264.77   24.60
  -1 -13  -4  274.97   25.10
   1 -13   4  264.87   26.20
   1  13   5  119.49   14.60
  -1  13  -5  152.58   17.70
   1 -13   5  140.09   17.80
  -1 -13  -5  154.88   19.90
  -1  13  -6  763.92   58.29
   1  13   6  786.32   56.79
  -1 -13  -6  759.72   59.19
   1 -13   6  746.13   60.09
   1  13   7  646.54   49.00
  -1  13  -7  652.53   50.49
  -1 -13  -7  650.73   52.59
  -1  13  -8 1352.76  103.09
   1  13   8 1431.06  101.79
  -1 -13  -8 1365.86  104.29
   1  13   9  182.18   18.60
  -1  13  -9  163.98   20.80
  -1 -13  -9  162.88   24.50
  -1  13 -10    9.30   16.80
  -1 -13 -10   19.20   22.90
  -1  13 -11   -5.70   17.30
  -1 -13 -11   -5.10   26.30
   1  14 -11  301.77   33.20
   1  14 -11  279.87   36.20
   1 -14 -11  304.17   35.30
   1  14 -10  109.79   26.20
   1  14 -10   59.59   18.60
   1 -14 -10   55.09   25.20
   1  14  -9  185.98   27.50
   1  14  -9  176.78   22.00
   1 -14  -9  211.28   26.40
   1  14  -8   60.99   16.00
   1  14  -8   49.70   18.30
   1 -14  -8   48.00   19.60
   1  14  -7   63.69   16.90
  -1  14   7   44.90    8.20
   1 -14  -7   61.69   17.40
   1  14  -6  296.17   25.30
  -1  14   6  225.98   21.00
   1 -14  -6  294.37   27.60
   1  14  -5  338.87   29.80
  -1  14   5  338.57   26.40
   1 -14  -5  346.97   30.90
   1  14  -4   20.40   11.30
  -1  14   4   48.40    7.70
   1 -14  -4   19.00   12.90
  -1 -14   4   19.70   12.40
   1  14  -3 1592.54  121.29
  -1  14   3 1708.63  120.69
   1 -14  -3 1717.53  121.59
  -1 -14   3 1602.54  121.29
   1  14  -2  361.76   28.70
  -1  14   2  352.76   27.30
   1 -14  -2  279.87   30.10
  -1 -14   2  378.86   28.50
   1  14  -1 1871.21  134.39
  -1  14   1 1774.72  134.09
  -1 -14   1 1832.72  134.49
   1 -14  -1 1885.01  134.99
   1  14   0  131.79   15.60
  -1  14  -1  333.87   30.60
   1  14   1  428.66   30.10
  -1  14  -2   46.50   10.60
  -1 -14  -2   49.40   10.80
   1 -14   2   77.49   12.50
  -1  14  -3   77.49   12.40
   1  14   3  118.19   11.60
   1 -14   3   78.39   13.90
  -1 -14  -3   89.79   12.60
   1  14   4   60.79    8.70
  -1  14  -4   75.19   12.30
  -1 -14  -4   54.69   12.30
   1 -14   4   54.89   14.00
   1  14   5  688.03   51.89
  -1  14  -5  724.83   53.39
  -1 -14  -5  708.83   53.79
   1 -14   5  665.83   54.69
   1  14   6   -5.40    8.60
  -1  14  -6   23.30   12.70
  -1 -14  -6   20.00   14.30
   1 -14   6   28.10   16.40
  -1  14  -7  543.55   45.30
   1  14   7  581.24   43.60
  -1 -14  -7  567.34   47.40
   1 -14   7  578.14   48.50
   1  14   8  124.59   15.30
  -1  14  -8  129.29   18.40
  -1 -14  -8  163.48   21.50
   1  14   9  252.97   23.10
  -1  14  -9  195.58   24.30
  -1 -14  -9  223.68   27.50
  -1  14 -10   51.39   18.60
  -1 -14 -10   13.40   23.70
  -1  14 -11   62.09   19.00
  -1 -14 -11   65.59   26.70
   1  15 -11  182.88   24.80
   1 -15 -11  198.18   31.30
   1  15 -10  102.39   19.90
   1 -15 -10  102.29   25.90
   1  15  -9  175.88   21.60
   1 -15  -9  170.08   25.80
  -1  15   8 1066.79   81.19
   1  15  -8 1146.09   83.29
   1 -15  -8 1116.49   85.49
   1  15  -7   42.10   14.90
  -1  15   7   26.60    8.20
   1 -15  -7   25.20   17.80
  -1  15   6  603.14   47.40
   1  15  -6  685.73   49.99
   1 -15  -6  639.94   51.29
  -1  15   5 1245.28   93.09
   1  15  -5 1297.77   94.59
  -1 -15   5 1248.18   95.09
   1 -15  -5 1312.57   94.99
   1  15  -4  184.68   18.20
  -1  15   4  186.38   16.60
  -1 -15   4  151.28   21.00
   1 -15  -4  156.68   21.10
   1  15  -3  134.79   15.10
  -1  15   3  130.89   14.20
  -1 -15   3  121.69   15.20
   1 -15  -3  115.99   16.10
  -1  15   2  710.33   51.89
   1  15  -2  675.33   52.69
   1 -15  -2  669.23   53.69
  -1 -15   2  726.63   52.99
  -1  15   1 1199.08   90.69
   1  15  -1 1222.48   90.99
   1 -15  -1 1199.78   91.99
  -1 -15   1 1321.77   91.29
   1  15   0 3786.62  285.17
  -1  15   0 3647.93  285.07
   1 -15   0 4069.29  285.67
  -1 -15   0 4207.58  285.37
   1  15   1   41.90    9.00
  -1  15  -1  -35.60    9.50
   1 -15   1   53.19   12.70
  -1  15  -2   26.00   10.80
  -1 -15  -2   22.10   10.40
   1 -15   2   39.20   13.00
  -1  15  -3 1136.49   79.69
   1  15   3 1052.59   78.69
  -1 -15  -3 1080.79   79.49
   1 -15   3 1024.80   80.39
   1  15   4   10.40    7.40
  -1  15  -4    8.60   11.30
  -1 -15  -4   -7.70   11.50
   1 -15   4    5.00   13.50
  -1  15  -5  378.76   30.60
   1  15   5  333.57   27.90
   1 -15   5  331.57   32.20
  -1 -15  -5  347.37   31.00
   1  15   6  590.14   45.00
  -1  15  -6  539.85   53.19
  -1 -15  -6  620.84   48.00
   1  15   7   99.39   12.80
  -1  15  -7  109.49   16.40
  -1 -15  -7   93.09   18.60
   1 -15   7   88.09   20.20
   1  15   8 1193.98   87.09
  -1  15  -8 1142.39   87.99
   1 -15   8 1143.99   91.29
  -1 -15  -8 1205.88   90.19
   1  15   9  195.78   21.10
  -1  15  -9  186.58   22.90
   1 -15   9  153.98   28.40
  -1 -15  -9  184.68   26.10
  -1  15 -10    1.70   18.60
   1 -15  10  -20.80   29.00
  -1 -15 -10    6.20   23.70
  -1  15 -11    9.30   19.20
   1 -15  11   19.20   31.70
  -1 -15 -11   23.30   25.80
   1  16 -11   97.69   21.90
   1 -16 -11   77.39   29.50
   1 -16 -10   11.10   24.90
   1  16  -9  270.77   29.80
   1 -16  -9  272.77   36.40
   1  16  -8   66.89   16.70
  -1  16   8   -1.30    9.40
   1 -16  -8   33.20   19.60
   1  16  -7   18.60   14.80
  -1  16   7   -9.20    8.40
   1 -16  -7   -0.30   18.80
  -1  16   6  683.63   52.69
   1  16  -6  728.03   57.09
   1 -16  -6  735.83   56.59
  -1 -16   6  704.63   57.09
  -1  16   5  266.07   22.90
   1  16  -5  284.27   26.80
   1 -16  -5  298.57   28.40
  -1 -16   5  258.37   27.50
  -1  16   4   25.80    8.50
   1  16  -4   -1.80   12.50
   1 -16  -4   14.70   13.30
  -1 -16   4    1.10   12.50
  -1  16   3  807.32   59.39
   1  16  -3  778.32   60.29
  -1 -16   3  784.92   60.59
   1 -16  -3  823.52   60.99
  -1  16   2  332.57   27.00
   1  16  -2  330.37   28.40
   1 -16  -2  296.47   30.70
  -1 -16   2  367.96   28.80
  -1  16   1  710.13   55.09
   1  16  -1  733.63   55.69
   1 -16  -1  710.03   56.89
  -1 -16   1  802.82   56.39
  -1  16   0   33.10    9.90
   1  16   0   55.99   10.60
  -1  16  -1  226.28   24.50
   1  16   1  318.47   24.50
   1 -16   1  337.07   27.70
  -1 -16  -1  255.87   25.50
   1  16   2  510.35   39.00
  -1  16  -2  513.75   40.30
  -1 -16  -2  505.85   40.00
   1 -16   2  524.05   41.90
   1  16   3   84.79   10.10
  -1  16  -3   78.19   12.90
   1 -16   3   61.39   14.00
  -1 -16  -3   68.89   12.60
   1  16   4   14.20    7.90
  -1  16  -4   13.10   11.60
  -1 -16  -4   14.80   12.10
   1 -16   4   19.90   13.70
   1  16   5  764.92   58.39
  -1  16  -5  802.62   60.09
   1 -16   5  765.12   61.69
  -1 -16  -5  801.52   60.49
  -1  16  -6   10.50   14.10
   1  16   6   -5.70    9.20
  -1 -16  -6   18.40   14.90
   1 -16   6    6.20   16.80
  -1  16  -7  128.09   17.90
   1  16   7  110.99   14.00
   1 -16   7  139.39   22.50
  -1 -16  -7  122.49   19.90
   1  16   8  427.16   37.00
  -1  16  -8  456.85   39.10
   1 -16   8  449.46   43.20
  -1 -16  -8  465.95   43.40
  -1  16  -9  333.97   35.20
   1 -16   9  328.87   42.60
  -1 -16  -9  346.77   39.20
  -1  16 -10   12.80   19.50
  -1 -16 -10   -1.70   24.80
   1 -16  10   25.80   27.20
  -1  16 -11   31.60   20.20
  -1 -16 -11   -3.00   27.40
   1 -16  11    8.00   30.80
   1  17 -11  176.88   25.40
   1 -17 -11  193.98   32.80
   1  17 -10  191.78   24.60
   1 -17 -10  183.68   30.40
   1  17  -9  443.16   40.00
   1 -17  -9  435.36   45.50
   1  17  -8  529.55   43.60
   1 -17  -8  453.05   45.80
   1  17  -7  330.97   32.30
  -1  17   7  288.97   26.40
  -1 -17   7  369.86   35.90
   1 -17  -7  331.77   39.50
   1  17  -6   40.80   15.40
  -1  17   6   44.30    9.30
  -1 -17   6   22.70   16.50
   1 -17  -6   40.70   17.10
  -1  17   5 1307.37   98.39
   1  17  -5 1352.56   99.79
  -1 -17   5 1358.76  100.39
   1 -17  -5 1362.46  100.29
  -1  17   4  725.23   52.89
   1  17  -4  670.13   54.19
  -1 -17   4  702.03   54.99
   1 -17  -4  720.83   55.49
   1  17  -3  693.23   53.49
  -1  17   3  714.63   52.89
  -1 -17   3  678.03   54.29
   1 -17  -3  737.63   54.79
  -1  17   2   -6.40    8.60
   1  17  -2   -9.30   11.00
   1 -17  -2  -32.40   13.30
  -1 -17   2    9.40   12.20
   1  17  -1 1675.73  123.99
  -1  17   1 1659.33  123.69
   1 -17  -1 1699.13  124.59
  -1 -17   1 1737.03  124.29
   1  17   0  745.23   58.69
  -1  17   0  718.73   58.49
  -1 -17   0  848.12   59.69
   1 -17   0  822.62   60.59
  -1  17  -1  388.96   34.10
   1  17   1  469.55   33.70
  -1 -17  -1  386.16   34.80
   1 -17   1  456.45   36.90
  -1  17  -2   26.10   11.40
   1  17   2   40.60    9.60
  -1 -17  -2   40.80   11.60
   1 -17   2   52.89   14.60
  -1  17  -3 1671.33  118.19
   1  17   3 1565.84  117.39
  -1 -17  -3 1645.74  117.99
   1 -17   3 1548.25  118.59
   1  17   4 2028.30  152.98
  -1  17  -4 2148.69  153.88
  -1 -17  -4 2159.08  153.78
   1 -17   4 2072.59  154.58
   1  17   5  326.67   27.10
   1 -17   5  325.77   33.50
  -1 -17  -5  328.77   31.10
  -1  17  -6  416.26   34.60
   1  17   6  380.76   31.80
   1 -17   6  376.26   36.70
  -1 -17  -6  388.76   36.50
  -1  17  -7  111.49   18.20
   1  17   7   87.19   13.20
   1 -17   7   94.49   22.20
  -1 -17  -7   98.99   19.60
   1  17   8  -16.00   13.10
  -1  17  -8   17.60   17.50
  -1 -17  -8   22.80   20.00
   1 -17   8   14.20   22.00
  -1  17  -9  287.67   32.20
   1 -17   9  263.77   32.50
  -1 -17  -9  234.28   30.60
  -1  17 -10  144.29   23.40
   1 -17  10  133.39   31.80
  -1 -17 -10  142.19   27.60
   1 -17  11   93.39   35.70
   1  18 -11   26.20   21.30
   1 -18 -11   42.40   29.70
  -1 -18  11   24.50   32.70
   1  18 -10   59.19   20.40
   1 -18 -10   68.69   27.40
  -1 -18  10   43.30   29.10
   1  18  -9  292.17   34.00
   1 -18  -9  265.47   33.10
  -1 -18   9  299.97   39.40
   1  18  -8   60.99   18.00
   1 -18  -8   31.70   21.40
  -1 -18   8   46.90   21.90
  -1  18   7  328.57   28.50
   1  18  -7  349.67   33.10
  -1 -18   7  375.26   36.50
   1 -18  -7  316.27   40.80
   1  18  -6  211.98   22.70
  -1  18   6  195.88   20.00
  -1 -18   6  208.58   24.20
   1 -18  -6  205.58   23.80
   1  18  -5  340.17   39.40
  -1  18   5  362.76   29.30
   1 -18  -5  364.96   34.00
  -1 -18   5  364.56   33.90
  -1  18   4  182.28   18.20
   1  18  -4  189.38   19.30
   1 -18  -4  189.08   24.40
  -1 -18   4  157.88   20.20
  -1  18   3  240.48   21.00
   1  18  -3  226.98   24.00
   1 -18  -3  241.58   26.10
  -1 -18   3  234.08   24.70
  -1  18   2  208.58   19.40
   1  18  -2  199.78   21.20
   1 -18  -2  186.28   23.60
  -1 -18   2  217.18   23.10
  -1  18   1   16.80    9.70
   1  18  -1   19.50   11.10
   1 -18  -1   11.60   14.40
  -1 -18   1   36.10   13.50
  -1  18   0   14.10   10.70
   1  18   0   22.70   10.60
   1 -18   0   47.20   15.70
  -1 -18   0   25.90   13.40
  -1  18  -1  222.28   23.00
   1  18   1  255.87   22.40
   1 -18   1  273.77   27.00
  -1 -18  -1  228.98   24.00
  -1  18  -2  130.29   16.10
   1  18   2  136.69   14.50
  -1 -18  -2  144.99   16.00
   1 -18   2  133.29   18.40
  -1  18  -3  815.42   59.69
   1  18   3  738.93   58.29
  -1 -18  -3  801.72   59.19
   1 -18   3  768.82   60.79
   1  18   4   48.20   10.00
  -1  18  -4   47.50   13.60
  -1 -18  -4   53.99   14.20
   1 -18   4   67.59   17.00
   1  18   5  541.75   41.60
  -1  18  -5  543.05   43.90
   1 -18   5  528.35   46.30
  -1 -18  -5  527.15   44.20
  -1  18  -6   13.20   15.50
   1  18   6    0.40   10.50
  -1 -18  -6    5.20   16.50
   1 -18   6    9.50   18.00
  -1  18  -7  132.39   20.00
   1  18   7  126.19   15.70
   1 -18   7  131.99   24.50
  -1 -18  -7  158.18   21.60
  -1  18  -8  145.09   21.00
   1  18   8  128.39   17.80
   1 -18   8  134.99   25.50
  -1 -18  -8  150.08   23.90
  -1  18  -9  395.06   39.20
  -1 -18  -9  426.56   44.00
   1 -18   9  431.56   48.70
  -1  18 -10   36.00   20.00
   1 -18  10   45.10   28.20
  -1 -18 -10   24.50   25.80
   1  19 -11   15.30   21.80
  -1 -19  11   13.10   36.70
   1 -19 -11  -15.70   30.20
   1  19 -10  572.64   48.90
  -1 -19  10  492.35   58.09
   1 -19 -10  508.25   53.69
   1  19  -9   42.50   20.50
   1 -19  -9   53.69   24.70
  -1 -19   9   42.80   24.70
   1  19  -8   31.20   19.00
   1 -19  -8   25.70   22.30
  -1 -19   8   12.60   23.10
   1  19  -7   95.79   19.30
  -1  19   7  131.29   14.40
  -1 -19   7  117.49   22.10
   1 -19  -7  143.69   22.10
   1  19  -6  338.37   34.40
  -1  19   6  383.96   30.40
   1 -19  -6  365.36   36.10
   1  19  -5  -16.30   14.80
  -1  19   5   13.90    9.60
  -1 -19   5   -3.40   16.80
   1 -19  -5   -1.20   16.40
  -1  19   4 2117.89  154.58
   1  19  -4 2097.99  155.58
  -1 -19   4 2098.49  155.88
   1 -19  -4 2176.38  155.88
  -1  19   3  627.84   47.20
   1  19  -3  618.04   48.50
   1 -19  -3  625.84   49.40
  -1 -19   3  605.94   49.60
   1  19  -2  520.25   41.20
  -1  19   2  525.05   40.20
  -1 -19   2  497.15   42.10
   1 -19  -2  535.95   42.60
  -1  19   1  223.08   22.30
   1  19  -1  250.67   23.00
   1 -19  -1  226.08   25.90
  -1 -19   1  243.48   25.30
  -1  19   0   10.10   10.80
   1  19   0   16.10   10.30
  -1 -19   0   14.50   13.90
   1 -19   0   37.40   16.20
  -1  19  -1  314.47   28.20
   1  19   1  318.57   28.20
   1 -19   1  347.67   31.80
  -1 -19  -1  315.67   29.00
   1  19   2 1004.90   72.19
  -1  19  -2  959.30   72.79
   1 -19   2  927.71   74.09
  -1 -19  -2  985.60   72.59
  -1  19  -3    7.30   13.20
   1  19   3   18.80   10.00
  -1 -19  -3   18.30   12.60
   1 -19   3   21.20   15.80
  -1  19  -4 3053.89  236.78
   1  19   4 3207.88  234.08
  -1 -19  -4 3373.66  234.68
   1 -19   4 3233.08  235.38
  -1  19  -5    3.00   14.80
   1  19   5    4.00   10.30
  -1 -19  -5   -0.40   15.00
   1  19   6    6.80   10.80
  -1  19  -6    4.30   16.20
  -1 -19  -6   -0.30   17.00
   1 -19   6    9.10   19.00
  -1  19  -7   39.60   17.40
  -1 -19  -7   39.40   19.70
   1 -19   7   24.40   22.80
   1  19   8  178.58   20.50
  -1  19  -8  202.78   24.40
  -1 -19  -8  216.78   26.80
   1 -19   8  187.68   31.60
  -1  19  -9   66.59   20.30
  -1 -19  -9   40.40   24.50
   1 -19   9   61.19   27.90
  -1  19 -10  469.35   44.00
   1 -19  10  467.55   52.89
   1  20 -10   61.59   22.00
  -1 -20  10   35.10   38.30
   1 -20 -10   13.70   27.30
   1  20  -9  122.79   23.60
   1 -20  -9  156.08   27.70
  -1 -20   9  127.19   28.40
   1  20  -8  -14.40   19.40
  -1 -20   8    8.50   23.10
   1 -20  -8    9.90   23.90
  -1  20   7  341.57   28.50
   1  20  -7  282.27   34.80
   1 -20  -7  330.87   35.90
  -1 -20   7  308.47   36.80
  -1  20   6   90.69   12.50
   1  20  -6   67.09   18.60
   1 -20  -6   74.99   19.80
  -1 -20   6   81.19   19.80
   1  20  -5  416.56   38.00
  -1  20   5  439.66   34.70
  -1 -20   5  450.25   39.40
   1 -20  -5  417.96   40.00
  -1  20   4  221.88   21.00
  -1 -20   4  196.28   26.10
   1 -20  -4  228.78   26.20
  -1  20   3  204.78   20.30
   1  20  -3  193.88   22.90
   1 -20  -3  185.78   25.50
  -1 -20   3  217.48   24.70
  -1  20   2  205.58   21.00
   1  20  -2  226.28   22.80
  -1 -20   2  212.58   25.20
   1 -20  -2  218.28   24.80
  -1  20   1    9.30   10.90
   1  20  -1    2.70   11.60
  -1 -20   1   -5.50   14.80
   1 -20  -1   -4.40   15.20
  -1  20   0   47.20   11.90
   1  20   0   52.39   11.90
   1 -20   0   54.49   17.10
  -1 -20   0   48.00   14.80
   1  20   1  935.51   70.89
  -1  20  -1  956.20   71.29
   1 -20   1  949.31   72.89
  -1 -20  -1  960.50   71.49
  -1  20  -2  256.57   27.00
   1  20   2  264.97   26.00
  -1 -20  -2  293.47   27.20
   1 -20   2  337.27   30.80
   1  20   3  453.45   36.00
  -1  20  -3  426.86   37.80
  -1 -20  -3  447.46   37.20
   1 -20   3  459.35   40.10
   1  20   4   99.49   13.50
  -1  20  -4   96.69   16.70
   1 -20   4   81.59   19.20
  -1 -20  -4   92.09   16.20
   1  20   5  290.97   25.30
  -1  20  -5  268.47   28.90
   1 -20   5  267.77   32.80
  -1 -20  -5  259.47   29.50
  -1  20  -6   34.50   17.50
   1  20   6   27.10   12.20
   1 -20   6   24.00   20.40
  -1 -20  -6   35.70   18.40
   1  20   7   21.40   12.90
  -1  20  -7   23.90   17.70
   1 -20   7   26.40   23.20
  -1 -20  -7   25.80   24.70
  -1  20  -8   26.80   19.00
   1  20   8  -11.50   15.60
  -1 -20  -8   11.80   22.20
   1 -20   8   24.50   25.40
  -1  20  -9  518.05   46.50
   1 -20   9  489.35   50.29
  -1 -20  -9  448.16   48.90
  -1  20 -10   37.10   23.10
  -1 -20 -10    8.80   27.20
   1 -20  10   21.30   32.70
   1  21 -10   63.19   24.10
  -1 -21  10   84.19   32.80
   1 -21 -10   71.59   29.70
   1  21  -9  107.09   22.60
   1 -21  -9   60.69   27.20
  -1 -21   9   78.89   27.70
   1  21  -8   -8.50   19.70
  -1 -21   8  -15.90   24.30
   1 -21  -8    5.20   23.40
  -1  21   7  104.99   13.80
   1  21  -7   71.99   19.80
   1 -21  -7   82.59   23.20
  -1 -21   7   78.19   24.50
  -1  21   6    6.60   11.10
   1  21  -6  -15.40   17.60
   1 -21  -6    9.80   19.50
  -1 -21   6   -6.50   20.30
   1  21  -5  410.46   39.50
  -1  21   5  464.85   36.20
  -1 -21   5  452.65   41.30
   1 -21  -5  457.45   40.70
  -1  21   4 1380.26   98.09
   1 -21  -4 1289.97   99.59
  -1 -21   4 1322.87   99.79
   1  21  -3  147.59   18.50
  -1  21   3  109.89   14.40
  -1 -21   3  133.79   19.40
   1 -21  -3  133.19   19.20
   1  21  -2  145.99   17.30
  -1  21   2  148.79   15.90
  -1 -21   2  142.59   20.00
   1 -21  -2  158.68   20.10
  -1  21   1  449.76   34.50
   1  21  -1  412.46   35.20
  -1 -21   1  416.46   37.30
   1 -21  -1  428.26   37.60
   1  21   0  566.04   44.40
  -1  21   0  562.44   44.20
   1 -21   0  562.04   46.90
  -1 -21   0  577.94   45.90
   1  21   1  171.38   20.00
  -1  21  -1  148.49   17.60
   1 -21   1  146.29   21.70
  -1 -21  -1  182.78   21.50
  -1  21  -2 1918.11  137.39
   1  21   2 1890.81  136.99
   1 -21   2 1802.92  138.29
  -1 -21  -2 1870.81  137.19
   1  21   3  586.44   45.30
  -1 -21  -3  591.84   46.40
   1 -21   3  558.94   48.90
  -1  21  -4  348.77   32.70
   1  21   4  365.06   29.90
  -1 -21  -4  330.27   32.50
   1 -21   4  332.87   35.50
   1  21   5  218.48   23.30
  -1  21  -5  224.28   23.90
   1 -21   5  234.38   26.60
  -1 -21  -5  219.18   27.50
  -1  21  -6   27.50   18.10
   1  21   6   27.90   13.00
  -1 -21  -6   34.90   19.30
   1 -21   6   28.70   21.10
  -1  21  -7   78.69   19.90
   1  21   7   73.49   15.50
   1 -21   7   79.09   23.80
  -1 -21  -7  110.59   31.70
  -1  21  -8   27.00   20.10
   1  21   8  -19.70   15.80
  -1 -21  -8   35.50   22.70
   1 -21   8   39.10   25.40
  -1  21  -9  276.87   30.30
  -1 -21  -9  270.47   33.30
   1 -21   9  243.28   37.80
  -1  21 -10  375.06   41.20
   1 -21  10  374.56   51.79
  -1 -21 -10  413.06   47.60
   1  22 -10   -0.60   23.10
   1 -22 -10    5.90   28.50
  -1 -22  10   22.90   31.10
   1  22  -9  125.89   24.60
   1 -22  -9  105.89   28.30
  -1 -22   9  127.09   31.00
   1  22  -8   16.70   21.10
  -1 -22   8   13.00   25.10
   1 -22  -8   31.20   25.00
  -1  22   7   59.69   13.20
   1  22  -7   24.40   19.50
   1 -22  -7   43.80   22.20
  -1 -22   7   30.10   24.70
  -1  22   6  192.08   20.20
   1  22  -6  138.49   22.60
  -1 -22   6  151.88   25.50
   1 -22  -6  141.19   35.70
  -1  22   5  314.57   27.10
   1  22  -5  276.07   30.90
   1 -22  -5  302.17   33.60
  -1 -22   5  288.77   33.10
   1  22  -4   69.19   17.00
  -1  22   4   95.59   13.20
  -1 -22   4   78.29   19.30
   1 -22  -4   60.39   18.30
   1  22  -3  469.85   37.30
  -1  22   3  449.36   36.40
  -1 -22   3  459.45   40.10
   1 -22  -3  436.66   39.50
  -1  22   2   -6.50   11.60
   1  22  -2    1.90   13.90
  -1 -22   2  -10.40   16.60
   1 -22  -2   14.10   16.50
  -1  22   1  249.97   23.50
   1  22  -1  252.27   24.40
  -1 -22   1  240.38   27.80
   1 -22  -1  230.18   28.70
   1  22   0   17.00   12.10
  -1  22   0   31.40   12.30
  -1 -22   0   30.40   15.30
   1 -22   0   12.30   17.60
  -1  22  -1  878.31   65.79
   1  22   1  850.01   65.29
  -1 -22  -1  885.51   65.89
   1 -22   1  854.81   67.59
   1  22   2  358.36   30.60
  -1  22  -2  337.97   31.90
  -1 -22  -2  355.06   31.70
   1 -22   2  369.86   35.80
  -1  22  -3   14.10   15.80
   1  22   3   37.90   12.80
  -1 -22  -3   35.70   15.00
   1 -22   3   55.49   19.10
  -1  22  -4   18.70   16.20
   1  22   4   42.30   13.10
  -1 -22  -4   27.70   16.40
   1 -22   4   32.60   21.50
  -1  22  -5   74.49   18.40
   1  22   5  101.99   15.50
  -1 -22  -5   85.79   19.10
   1 -22   5   97.19   22.40
  -1  22  -6   -7.80   18.40
   1  22   6   -9.30   13.30
  -1 -22  -6  -11.30   19.50
   1 -22   6    3.70   21.50
  -1  22  -7   51.39   20.60
   1  22   7   31.50   15.50
  -1 -22  -7   65.69   23.30
   1 -22   7   39.60   24.30
  -1  22  -8   80.39   21.60
   1 -22   8   80.49   27.60
  -1 -22  -8   74.19   24.60
  -1  22  -9  251.47   30.80
  -1 -22  -9  279.27   34.50
   1 -22   9  262.67   44.30
   1  23 -10    4.30   24.50
   1 -23 -10    7.90   29.50
  -1 -23  10   25.20   34.30
   1  23  -9   98.59   24.90
  -1 -23   9   66.69   31.50
   1 -23  -9   81.89   28.40
   1  23  -8  264.27   30.80
  -1 -23   8  284.37   35.40
   1 -23  -8  286.07   33.90
  -1  23   7  288.47   30.90
   1  23  -7  268.27   29.40
  -1 -23   7  284.37   34.60
   1 -23  -7  248.08   31.20
   1  23  -6  315.07   34.50
  -1  23   6  355.66   29.20
   1 -23  -6  273.77   37.30
  -1 -23   6  316.17   37.00
   1  23  -5  102.09   19.80
  -1  23   5  149.59   15.50
  -1 -23   5  113.49   26.10
   1 -23  -5  115.89   21.90
   1  23  -4   93.19   18.00
  -1  23   4  117.79   14.40
  -1 -23   4  112.99   21.00
   1 -23  -4   92.29   20.00
   1  23  -3 1448.36  108.29
  -1  23   3 1502.95  107.49
  -1 -23   3 1467.65  109.09
   1 -23  -3 1414.46  108.59
   1  23  -2  362.56   37.70
  -1  23   2  431.86   33.90
  -1 -23   2  395.66   37.90
   1 -23  -2  401.36   37.30
   1  23  -1    5.20   13.30
  -1  23   1    4.60   12.70
   1 -23  -1    1.50   17.10
  -1 -23   1   -5.30   17.40
  -1  23   0 1301.17   97.49
   1  23   0 1322.17   97.79
   1 -23   0 1344.87   98.99
  -1 -23   0 1301.27   98.29
  -1  23  -1  679.93   49.30
   1  23   1  608.34   49.20
   1 -23   1  600.44   52.19
  -1 -23  -1  616.74   49.99
   1  23   2   48.20   13.70
  -1  23  -2   51.69   17.90
  -1 -23  -2   58.99   15.30
   1 -23   2   50.39   20.50
  -1  23  -3  591.54   48.00
   1  23   3  571.24   46.20
  -1 -23  -3  574.74   47.20
   1 -23   3  593.54   50.69
   1  23   4   17.70   13.80
  -1  23  -4  -17.70   16.20
   1 -23   4   25.20   24.40
  -1 -23  -4    8.20   16.20
   1  23   5  303.07   29.30
  -1  23  -5  285.97   32.00
   1 -23   5  298.47   37.30
  -1 -23  -5  331.37   33.10
  -1  23  -6  192.58   26.00
   1  23   6  205.38   21.40
   1 -23   6  199.48   28.60
  -1 -23  -6  212.78   25.80
   1  23   7  195.48   23.90
  -1  23  -7  234.28   27.40
  -1 -23  -7  249.68   28.90
   1 -23   7  242.68   32.10
  -1  23  -8  203.28   27.30
   1 -23   8  185.78   34.40
  -1 -23  -8  199.18   29.20
  -1  23  -9   37.90   24.10
   1 -23   9   31.20   30.10
  -1 -23  -9    8.50   27.30
   1  24  -9  285.17   33.90
  -1 -24   9  317.47   47.30
   1  24  -8   55.39   22.60
  -1 -24   8   43.70   33.80
   1 -24  -8   48.90   26.70
   1  24  -7   -5.80   20.80
   1 -24  -7   14.10   23.70
  -1 -24   7   18.60   25.60
  -1  24   6   70.59   14.10
   1  24  -6   27.90   20.80
   1 -24  -6   54.09   21.70
  -1 -24   6   38.90   23.00
   1  24  -5  -18.70   17.90
  -1  24   5   28.60   12.70
   1 -24  -5    4.40   19.40
  -1 -24   5   15.10   25.70
   1  24  -4  103.19   19.40
  -1  24   4  122.99   15.40
   1 -24  -4  103.39   20.60
  -1 -24   4  101.89   22.50
   1  24  -3  588.24   47.00
  -1  24   3  612.84   45.90
   1 -24  -3  513.75   47.80
  -1 -24   3  583.64   49.99
   1  24  -2  142.89   18.90
  -1  24   2  146.39   17.50
  -1 -24   2  164.18   22.80
   1 -24  -2  149.19   21.60
  -1  24   1  414.76   34.90
   1 -24  -1  406.96   37.40
  -1 -24   1  395.96   37.90
   1  24   0  214.48   24.40
  -1  24   0  206.68   24.30
   1 -24   0  196.38   25.20
  -1 -24   0  206.48   25.10
   1  24   1   82.09   14.60
   1 -24   1   94.29   21.70
  -1 -24  -1   80.69   16.90
  -1  24  -2   56.99   16.60
   1  24   2   65.09   14.60
   1 -24   2   66.79   21.80
  -1 -24  -2   68.39   16.50
  -1  24  -3  -17.10   16.20
   1  24   3    0.90   13.50
  -1 -24  -3    3.30   15.80
   1 -24   3  -15.00   21.20
  -1  24  -4  -14.80   16.90
   1  24   4   -1.60   14.50
  -1 -24  -4   14.90   17.30
   1 -24   4   -2.20   22.80
  -1  24  -5  445.46   42.50
   1  24   5  476.55   40.50
   1 -24   5  491.75   47.70
  -1 -24  -5  488.05   43.60
   1  24   6  -12.50   15.40
  -1  24  -6   17.60   19.90
  -1 -24  -6    2.40   20.80
   1 -24   6    9.60   26.20
  -1  24  -7   78.09   22.30
   1  24   7   59.99   18.40
  -1 -24  -7   75.99   23.40
   1 -24   7   77.39   28.90
  -1  24  -8   41.10   23.20
  -1 -24  -8    8.10   24.60
   1 -24   8   45.20   36.10
  -1  24  -9   62.99   25.30
   1 -24   9   41.70   35.30
  -1 -24  -9   90.99   28.60
   1  25  -9   49.10   25.50
   1 -25  -9   30.20   28.90
  -1 -25   9   45.80   43.60
   1  25  -8 1024.00   85.09
   1 -25  -8 1071.59   87.69
  -1 -25   8 1154.58   89.49
   1  25  -7   38.40   21.80
   1 -25  -7   14.00   24.70
  -1 -25   7   34.00   26.50
   1  25  -6  314.67   37.30
  -1  25   6  422.46   32.50
  -1 -25   6  350.16   43.20
   1 -25  -6  306.97   38.20
   1  25  -5   -7.90   19.20
  -1  25   5   50.99   13.50
   1 -25  -5   11.70   25.00
  -1 -25   5   15.70   23.40
   1  25  -4   -4.40   18.00
  -1  25   4    9.60   13.40
  -1 -25   4   -1.60   21.80
   1 -25  -4   -1.70   19.10
  -1  25   3  157.98   18.40
   1  25  -3  158.38   20.80
   1 -25  -3  138.19   22.20
  -1 -25   3  170.18   24.50
  -1  25   2  901.71   66.69
   1  25  -2  876.01   67.49
   1 -25  -2  819.42   68.19
  -1 -25   2  914.11   69.99
   1  25  -1  282.77   27.60
  -1  25   1  288.47   27.00
   1 -25  -1  256.57   32.20
  -1 -25   1  289.47   31.40
  -1  25   0 1246.98   92.39
  -1 -25   0 1240.48   93.09
   1 -25   0 1235.78   94.49
   1  25   1    9.10   13.20
  -1  25  -1  -13.30   15.10
  -1 -25  -1    3.10   15.90
   1 -25   1  -17.50   21.10
  -1  25  -2  389.76   37.30
   1  25   2  433.76   36.10
  -1 -25  -2  414.46   36.70
   1 -25   2  437.26   43.00
  -1  25  -3   -7.60   16.80
   1  25   3   30.20   14.70
  -1 -25  -3  -15.20   16.60
   1  25   4   39.20   15.40
  -1  25  -4   11.80   18.30
   1 -25   4   51.99   24.70
  -1 -25  -4   52.49   18.10
  -1  25  -5   -0.20   19.10
   1  25   5   36.00   16.50
  -1 -25  -5   36.40   20.00
   1 -25   5   32.90   26.30
  -1  25  -6  791.12   68.29
   1  25   6  880.91   66.59
  -1 -25  -6  863.91   69.29
   1 -25   6  876.11   74.09
   1  25   7   17.40   19.10
  -1  25  -7   53.49   22.80
  -1 -25  -7   31.80   23.50
   1 -25   7   35.40   32.60
  -1  25  -8  261.97   31.40
  -1 -25  -8  253.37   32.80
   1 -25   8  249.88   36.70
  -1  25  -9   19.60   25.90
   1 -25   9   37.70   46.60
  -1 -25  -9    9.40   28.40
   1  26  -9  268.37   34.40
   1 -26  -9  261.17   37.00
  -1 -26   9  321.07   53.09
   1  26  -8   38.50   24.40
  -1 -26   8   35.30   31.20
   1 -26  -8   70.29   28.00
   1  26  -7   29.50   22.70
  -1 -26   7   28.30   26.70
   1 -26  -7   15.90   25.20
   1  26  -6    1.20   20.70
  -1  26   6   22.70   15.00
  -1 -26   6    0.30   26.30
   1 -26  -6    7.80   22.50
  -1  26   5   47.10   14.60
   1  26  -5    6.40   19.40
   1 -26  -5    6.70   24.70
  -1 -26   5   -9.60   24.30
  -1  26   4   18.70   13.80
   1  26  -4  -23.50   17.40
   1 -26  -4  -11.20   19.80
  -1 -26   4   -1.50   23.50
   1  26  -3  147.09   21.20
  -1  26   3  182.98   19.10
   1 -26  -3  165.38   23.50
  -1 -26   3  154.28   26.50
  -1  26   2  303.97   28.80
   1  26  -2  281.47   30.20
  -1 -26   2  289.27   35.10
   1 -26  -2  289.67   33.20
  -1  26   1  283.77   28.70
   1  26  -1  286.07   29.00
   1 -26  -1  294.27   32.90
  -1 -26   1  278.47   33.00
   1  26   0   47.20   15.00
  -1  26   0   45.70   16.40
  -1 -26   0   37.70   18.30
   1 -26   0   55.99   21.40
  -1  26  -1    2.80   16.30
  -1 -26  -1   27.80   16.90
   1 -26   1   21.60   22.40
  -1  26  -2   -7.00   17.20
   1  26   2   31.70   15.00
  -1 -26  -2   18.90   16.90
   1 -26   2    9.80   23.60
   1  26   3   13.80   15.20
  -1  26  -3    7.60   17.90
  -1 -26  -3   -5.80   17.50
   1 -26   3   -0.90   23.70
   1  26   4  130.49   19.00
  -1  26  -4  104.59   21.80
  -1 -26  -4  137.59   21.50
   1 -26   4   99.89   27.60
  -1  26  -5  445.66   44.30
   1  26   5  504.55   42.70
  -1 -26  -5  493.85   45.40
   1 -26   5  523.65   52.49
   1  26   6  189.58   23.50
  -1  26  -6  163.18   25.80
   1 -26   6  177.48   33.90
  -1 -26  -6  211.28   31.30
   1  26   7  -16.00   21.40
  -1  26  -7   13.70   23.70
   1 -26   7    5.90   30.30
  -1 -26  -7   -1.00   23.40
  -1  26  -8   12.90   24.10
  -1 -26  -8  -13.00   25.90
   1 -26   8  -34.10   32.80
   1  27  -8  290.17   33.30
   1 -27  -8  262.37   36.00
  -1 -27   8  295.47   40.10
   1  27  -7  502.15   47.50
   1 -27  -7  467.35   50.69
  -1 -27   7  523.05   52.89
   1  27  -6   31.00   22.00
  -1  27   6   72.79   16.60
   1 -27  -6   66.09   23.70
  -1 -27   6    1.50   29.60
   1  27  -5    7.90   20.00
  -1  27   5   28.30   15.20
   1 -27  -5    1.90   21.30
  -1 -27   5  -43.80   26.10
  -1  27   4   12.50   14.50
   1  27  -4    7.10   19.40
   1 -27  -4    6.10   21.60
  -1  27   3  303.77   28.40
   1  27  -3  268.67   30.70
  -1 -27   3  270.47   37.40
   1 -27  -3  273.67   33.20
  -1  27   2  125.39   18.00
   1  27  -2  112.79   19.30
  -1 -27   2   98.59   23.80
   1 -27  -2  119.79   22.00
   1  27  -1  317.87   31.10
  -1  27   1  285.77   34.90
   1 -27  -1  328.57   34.40
  -1 -27   1  293.57   34.10
  -1  27   0  552.24   43.80
   1  27   0  542.75   43.90
   1 -27   0  495.65   47.80
  -1 -27   0  521.25   45.30
  -1  27  -1  562.64   48.70
   1  27   1  611.64   48.80
  -1 -27  -1  598.14   48.90
   1 -27   1  614.94   52.79
  -1  27  -2   16.50   17.60
   1  27   2   20.80   16.00
  -1 -27  -2   31.50   17.40
  -1  27  -3   28.60   19.60
  -1 -27  -3   31.80   18.30
   1 -27   3   27.20   25.30
  -1  27  -4  118.99   22.30
   1  27   4  147.79   19.90
   1 -27   4  105.79   28.40
  -1 -27  -4  123.59   21.90
   1  27   5   90.79   19.10
  -1  27  -5   55.49   21.50
  -1 -27  -5   79.29   21.30
   1 -27   5   73.49   28.40
  -1  27  -6  203.58   28.90
   1  27   6  239.48   26.50
  -1 -27  -6  235.68   33.80
   1 -27   6  257.37   35.50
  -1  27  -7  717.73   62.79
  -1 -27  -7  716.83   63.79
   1 -27   7  764.12   66.89
  -1  27  -8   58.39   26.70
   1 -27   8   69.19   44.00
  -1 -27  -8   47.40   27.10
   1  28  -8   20.50   26.00
  -1 -28   8   19.80   33.00
   1 -28  -8   15.40   29.00
   1  28  -7   33.30   24.90
  -1 -28   7  -21.30   31.80
   1 -28  -7   32.80   26.50
   1  28  -6   49.50   22.60
  -1  28   6   86.89   17.90
   1 -28  -6   27.50   24.40
  -1 -28   6   37.60   33.30
   1  28  -5   80.39   22.60
  -1  28   5   99.39   17.80
   1 -28  -5   60.29   23.20
  -1 -28   5   64.59   31.10
   1  28  -4   98.19   21.40
  -1  28   4  124.99   18.40
  -1 -28   4  116.89   28.60
   1 -28  -4  110.49   28.30
   1  28  -3   65.19   19.30
  -1  28   3   55.69   16.20
  -1 -28   3   34.10   26.00
   1 -28  -3   57.79   21.10
   1  28  -2  192.38   23.50
  -1 -28   2  171.18   27.70
   1 -28  -2  237.98   30.20
  -1  28   1   88.09   17.50
   1  28  -1   85.69   18.30
   1 -28  -1   67.99   21.10
  -1 -28   1   30.40   21.80
  -1  28   0  174.68   21.30
   1  28   0  160.78   21.20
   1 -28   0  155.18   25.50
  -1 -28   0  183.08   23.40
   1  28   1  166.68   20.70
  -1  28  -1  138.59   22.10
  -1 -28  -1  196.98   22.70
   1 -28   1  154.28   31.50
  -1  28  -2   20.10   18.30
   1  28   2   54.49   16.80
  -1 -28  -2   51.59   18.30
   1 -28   2   37.50   25.30
  -1  28  -3   -2.10   19.40
   1  28   3   12.40   16.50
  -1 -28  -3   30.40   18.60
   1 -28   3  -23.40   26.50
  -1  28  -4  246.18   29.00
   1  28   4  262.57   29.30
   1 -28   4  285.17   35.80
  -1 -28  -4  268.57   32.70
  -1  28  -5   14.30   21.50
  -1 -28  -5   23.70   21.00
   1 -28   5   16.70   28.50
  -1  28  -6  192.28   27.80
   1  28   6  218.08   25.70
   1 -28   6  200.28   36.40
  -1 -28  -6  178.78   28.00
  -1  28  -7   28.40   26.00
   1 -28   7   21.40   34.10
  -1 -28  -7    5.10   26.40
  -1  28  -8   13.00   27.60
   1 -28   8    3.30   38.30
  -1 -28  -8  -34.60   28.10
   1  29  -8   34.20   27.50
  -1 -29   8   44.50   34.10
   1 -29  -8   17.70   29.60
   1  29  -7  262.57   32.30
   1 -29  -7  275.27   34.70
  -1 -29   7  280.97   41.20
   1  29  -6    7.00   23.80
   1 -29  -6   10.10   24.70
  -1 -29   6  -29.70   32.70
  -1  29   5   37.30   16.70
   1  29  -5   20.60   22.10
   1 -29  -5   12.20   22.90
  -1 -29   5    7.90   30.80
   1  29  -4  557.24   50.89
  -1  29   4  636.74   48.90
  -1 -29   4  567.24   58.69
   1 -29  -4  586.14   52.19
   1  29  -3   35.30   19.60
  -1 -29   3   -4.20   27.60
   1  29  -2  111.69   20.50
  -1  29   2  110.59   18.70
   1 -29  -2  121.09   23.70
  -1 -29   2   83.89   26.10
  -1  29   1  250.77   29.80
   1  29  -1  268.67   29.90
  -1 -29   1  234.18   30.40
   1 -29  -1  308.57   31.90
  -1  29   0   46.40   18.60
   1  29   0   44.80   17.90
  -1 -29   0   81.79   19.80
   1 -29   0   46.50   26.80
  -1  29  -1  373.06   36.60
   1  29   1  361.96   35.40
   1 -29   1  302.27   44.90
  -1 -29  -1  469.85   37.60
   1  29   2  649.93   52.19
  -1  29  -2  627.64   52.59
  -1 -29  -2  642.24   52.29
   1 -29   2  603.64   57.29
  -1  29  -3   -6.40   19.70
   1  29   3   25.60   17.40
  -1 -29  -3   13.30   18.90
   1 -29   3  -46.70   29.20
  -1  29  -4  123.49   23.70
   1  29   4  136.39   20.90
  -1 -29  -4  134.89   23.20
   1 -29   4  133.59   33.30
   1  29   5   58.99   19.60
  -1  29  -5   26.90   21.90
  -1 -29  -5   10.00   21.90
   1 -29   5   24.10   31.60
  -1  29  -6   78.49   25.20
   1  29   6   93.09   26.50
   1 -29   6   84.49   35.70
  -1 -29  -6   97.69   25.30
  -1  29  -7  433.36   48.10
   1 -29   7  489.95   66.59
  -1 -29  -7  489.55   49.30
   1  30  -7   47.00   27.00
   1 -30  -7   33.50   27.30
  -1 -30   7   10.00   35.40
   1  30  -6  148.79   27.60
   1 -30  -6  168.18   28.80
  -1 -30   6  170.18   39.40
   1  30  -5  144.99   26.10
  -1  30   5  167.98   21.10
  -1 -30   5  117.39   34.50
   1 -30  -5  103.09   26.00
   1  30  -4   20.80   21.50
  -1 -30   4  -13.40   30.60
   1 -30  -4   24.10   22.10
  -1  30   3   17.60   17.50
   1  30  -3   17.90   20.00
   1 -30  -3   29.00   21.90
  -1 -30   3  -35.20   29.90
   1  30  -2  286.77   33.50
  -1  30   2  324.57   32.60
  -1 -30   2  271.67   35.20
   1 -30  -2  387.26   42.90
  -1  30   1    5.50   17.00
   1  30  -1   12.90   18.50
   1 -30  -1   37.40   27.70
  -1 -30   1  -15.60   22.30
  -1  30   0    9.10   18.00
   1  30   0    9.90   17.40
  -1 -30   0   28.80   19.50
   1 -30   0   67.89   23.80
   1  30   1  217.98   25.90
  -1  30  -1  225.58   26.40
   1 -30   1  176.88   30.70
  -1 -30  -1  299.57   30.10
   1  30   2  125.69   19.70
  -1  30  -2  117.79   21.70
  -1 -30  -2  131.99   21.20
   1 -30   2   74.09   30.00
   1  30   3   63.39   27.20
  -1  30  -3   48.10   21.30
   1 -30   3   18.10   30.60
  -1 -30  -3   52.59   19.90
  -1  30  -4  110.29   24.60
   1  30   4  137.49   22.10
  -1 -30  -4  135.29   23.20
   1 -30   4  101.89   34.50
   1  30   5   22.50   20.40
  -1  30  -5   -8.70   22.90
   1 -30   5  -32.20   34.70
  -1  30  -6   65.19   26.20
   1  30   6   96.89   23.90
  -1 -30  -6   39.80   25.60
   1 -30   6   28.00   39.60
  -1  30  -7  -22.60   26.20
   1 -30   7   16.70   39.40
  -1 -30  -7  -38.30   29.60
   1  31  -7    0.20   26.30
  -1 -31   7  -23.50   37.40
   1 -31  -7  -18.50   27.70
   1  31  -6   41.60   25.00
   1 -31  -6   42.40   26.60
  -1 -31   6  -19.30   39.30
   1  31  -5  139.29   26.40
   1 -31  -5  135.19   26.70
  -1 -31   5  114.09   36.30
   1  31  -4  498.85   47.60
  -1  31   4  588.84   44.50
   1 -31  -4  498.65   48.60
  -1 -31   4  411.76   58.59
  -1  31   3  412.46   40.10
   1  31  -3  443.76   39.50
  -1 -31   3  325.27   41.70
   1 -31  -3  380.96   40.50
   1  31  -2  198.88   25.30
  -1  31   2  218.18   24.30
   1 -31  -2  264.37   32.90
  -1 -31   2  127.09   31.00
   1  31  -1  144.79   22.90
  -1  31   1  151.58   22.30
  -1 -31   1   90.79   25.50
   1 -31  -1  194.88   26.20
   1  31   0   13.30   19.00
  -1  31   0   18.40   18.90
   1 -31   0   18.00   23.90
  -1 -31   0   49.99   20.60
   1  31   1   58.29   20.00
  -1  31  -1   24.80   19.90
   1 -31   1  -11.80   26.50
  -1 -31  -1   89.59   20.60
  -1  31  -2  567.04   48.30
   1  31   2  558.84   47.90
   1 -31   2  498.15   55.39
  -1 -31  -2  554.14   47.50
   1  31   3  197.78   25.20
  -1  31  -3  161.88   27.20
   1 -31   3  195.28   35.80
  -1 -31  -3  227.58   25.90
   1  31   4  201.68   24.60
  -1  31  -4  193.68   27.90
  -1 -31  -4  185.58   25.90
   1 -31   4  147.69   37.90
   1  31   5   30.90   20.40
  -1  31  -5  -15.10   24.50
   1 -31   5  -78.79   36.90
  -1 -31  -5  -38.00   22.90
  -1  31  -6  115.89   28.40
   1  31   6  157.58   27.20
  -1 -31  -6   99.39   32.20
   1 -31   6   51.89   38.70
   1  32  -6  207.58   31.60
  -1 -32   6  212.38   48.00
   1 -32  -6  213.68   32.00
  -1  32   5  116.59   21.80
   1  32  -5   88.19   26.00
  -1 -32   5  -22.60   39.60
   1 -32  -5   74.19   26.00
  -1  32   4  100.99   21.00
   1  32  -4   83.79   24.00
   1 -32  -4   95.49   24.60
  -1 -32   4   11.00   34.00
   1  32  -3   31.80   22.40
  -1  32   3   37.00   19.40
   1 -32  -3   39.00   22.90
  -1 -32   3  -65.69   29.50
   1  32  -2  201.68   26.20
  -1  32   2  226.98   25.50
   1 -32  -2  234.78   28.40
  -1 -32   2  109.29   32.50
   1  32  -1   23.50   20.10
  -1  32   1    5.90   19.90
   1 -32  -1   57.29   23.80
  -1 -32   1  -23.10   22.50
   1  32   0  115.79   22.30
  -1  32   0   98.59   23.00
  -1 -32   0  173.98   23.30
   1 -32   0  108.59   27.20
  -1  32  -1   37.10   20.30
   1  32   1   53.29   20.50
  -1 -32  -1   72.99   21.10
   1 -32   1  -14.60   27.80
   1  32   2  147.19   23.60
  -1  32  -2  152.98   24.90
  -1 -32  -2  171.98   23.00
   1 -32   2   47.20   34.10
   1  32   3   77.89   20.20
  -1  32  -3   27.00   22.20
   1 -32   3  -42.30   33.00
  -1 -32  -3   43.10   20.20
  -1  32  -4    2.20   23.70
   1  32   4   33.30   20.60
  -1 -32  -4   15.60   23.60
   1 -32   4  -49.90   37.50
   1  32   5   88.29   22.90
  -1  32  -5   13.10   25.10
   1 -32   5  -96.09   36.00
  -1  32  -6    9.90   26.60
   1 -32   6  -48.90   40.40
  -1 -33   6  -87.99   45.50
   1  33  -5  315.87   38.40
  -1  33   5  484.95   40.50
  -1 -33   5  287.67   50.39
   1 -33  -5  359.96   42.80
  -1  33   4   59.59   21.50
   1  33  -4   36.60   24.60
   1 -33  -4   36.10   24.50
  -1 -33   4  -75.79   37.60
   1  33  -3  736.23   61.39
  -1  33   3  781.72   59.89
  -1 -33   3  619.14   67.29
   1 -33  -3  762.92   61.79
   1  33  -2   12.70   21.50
  -1  33   2    4.90   20.00
  -1 -33   2  -82.79   27.00
   1 -33  -2   77.79   24.10
   1  33  -1    7.70   21.90
  -1  33   1   10.10   21.20
   1 -33  -1   61.49   24.90
   1  33   0   -4.10   20.60
  -1  33   0    5.40   21.60
  -1 -33   0   63.99   21.50
   1 -33   0   22.10   26.70
   1  33   1  153.68   23.40
  -1  33  -1  102.79   24.40
   1 -33   1   92.99   29.70
   1  33   2   55.59   21.60
  -1  33  -2   31.10   22.80
  -1 -33  -2   24.70   19.10
   1 -33   2  -57.49   31.80
  -1  33  -3  673.63   54.49
   1  33   3  707.13   53.79
   1 -33   3  499.85   65.29
  -1 -33  -3  556.04   55.79
   1  33   4  155.38   25.30
  -1  33  -4  124.89   27.40
   1 -33   4   27.40   41.20
  -1  33  -5  127.49   28.20
   1  33   5  208.18   28.20
   1 -33   5   52.19   46.60
   1  34  -5   17.30   26.70
  -1 -34   5  -96.79   42.50
   1 -34  -5   16.10   26.10
  -1  34   4   54.39   23.00
   1  34  -4   10.00   25.70
  -1 -34   4 -118.79   38.60
   1 -34  -4   20.10   25.20
   1  34  -3   47.20   24.40
  -1  34   3   71.19   22.30
   1 -34  -3   55.79   25.00
   1  34  -2   52.29   23.00
  -1  34   2   68.09   22.50
   1 -34  -2  118.29   25.40
  -1 -34   2  -20.30   29.50
   1  34  -1   78.69   23.70
  -1  34   1   51.49   22.80
  -1 -34   1    5.20   24.50
   1 -34  -1  101.19   25.70
  -1  34   0   39.10   22.10
   1  34   0   47.80   22.90
   1 -34   0   93.29   27.30
  -1  34  -1    5.10   22.40
   1  34   1   18.10   22.00
  -1 -34  -1   75.69   20.70
   1 -34   1   -2.00   29.90
   1  34   2  255.07   28.60
  -1  34  -2  247.48   29.80
   1 -34   2  127.99   37.80
  -1  34  -3   24.70   24.40
   1  34   3   69.99   24.30
   1  34   4   59.09   23.60
  -1  34  -4   40.30   25.80
   1 -34   4 -122.89   39.50
  -1  35   4   60.59   24.30
   1  35  -4   23.90   28.20
   1 -35  -4   57.29   26.40
  -1  35   3  153.48   27.10
   1  35  -3  136.99   28.50
   1 -35  -3  176.08   28.40
   1  35  -2  132.59   26.60
  -1  35   2  126.59   24.80
   1 -35  -2  134.69   26.80
  -1 -35   2   61.99   30.60
   1  35  -1   21.70   24.80
  -1  35   1   41.20   23.70
  -1 -35   1   37.30   26.50
   1 -35  -1   84.49   26.90
   1  35   0  103.99   26.40
  -1  35   0   86.79   24.20
   1 -35   0  129.69   29.30
  -1 -35   0  160.98   28.30
  -1  35  -1   29.40   23.80
   1  35   1   45.30   24.00
   1 -35   1    2.00   31.00
   1  35   2  193.28   28.60
  -1  35  -2  201.48   28.00
   1 -35   2   51.09   37.80
  -1  35  -3  414.76   46.10
   1  35   3  495.65   50.79
   1 -35   4 -124.49   45.10
   1  36  -3   57.19   28.00
   1 -36  -3   68.59   27.00
   1  36  -2   82.39   26.30
  -1  36   2  103.19   25.50
   1 -36  -2  130.69   26.60
  -1 -36   2    3.20   31.20
   1  36  -1  100.19   27.10
  -1  36   1   85.39   25.90
   1 -36  -1  138.79   28.40
   1  36   0   44.30   25.20
  -1  36   0   21.20   25.10
   1 -36   0   90.39   29.00
   1  36   1   49.50   25.80
  -1  36  -1   24.30   26.20
   1 -36   1   -9.10   29.50
   1  36   2  211.38   29.50
  -1  36  -2  165.28   29.00
   1 -36   2   47.20   38.40
  -1  37   1  206.08   30.90
   1  37  -1  193.98   33.00
   1 -37  -1  321.27   39.10
  -1  37   0  151.48   30.80
   1  37   0  180.88   31.00
   1 -37   0  200.38   32.50
   2   0 -12   33.50   26.40
   2   0 -11   49.20   24.80
   2   0 -11   28.10   13.00
   2   0 -10  422.06   42.40
   2   0 -10  427.06   34.90
   2   0  -9    5.20    9.30
   2   0  -9   16.70   17.20
   2   0  -8 1222.98   86.19
   2   0  -8 1109.79   91.99
   2   0  -7   -0.40   11.90
   2   0  -7   -0.80    6.80
   2   0  -6 1193.18   90.39
   2   0  -6 1249.77   89.09
   2   0  -5   -9.10    9.40
   2   0  -4  544.25   41.40
   2   0  -3    1.20    6.60
  -2   0   2 4323.77  327.27
   2   0  -2 4287.17  327.27
   2   0  -2 4424.86  327.27
  -2   0   2 4999.00  327.47
  -2   0   1   -2.50    4.90
   2   0  -1   -4.60    5.00
   2   0   0 2266.87  169.58
  -2   0   0 2488.75  169.08
   2   0   0 2224.58  169.28
   2   0   1    4.20    4.70
   2   0   1   -2.50    4.50
  -2   0  -1    1.20    4.70
  -2   0  -1    0.70    4.40
  -2   0  -2  772.62   54.59
  -2   0  -2  714.93   54.89
  -2   0  -3    0.60    6.90
  -2   0  -3   -0.10    5.70
  -2   0  -4   12.30    8.50
  -2   0  -4   21.00    6.40
  -2   0  -5   -5.70    7.30
  -2   0  -5   -0.20    9.30
  -2   0  -6  715.73   53.89
  -2   0  -6  728.63   55.09
  -2   0  -7   12.30    9.30
  -2   0  -7   19.10   12.90
  -2   0  -8 1284.17   98.39
  -2   0  -8 1335.57   96.39
  -2   0  -9   -3.00   11.80
  -2   0  -9   12.20   16.60
  -2   0 -10   73.79   16.10
  -2   0 -10   82.89   21.40
  -2   0 -11   12.90   17.70
  -2   0 -11   37.10   23.10
  -2   0 -12   72.89   27.40
  -2   0 -12   78.39   23.00
   2   1 -12   38.80   26.30
   2  -1 -12   42.60   26.80
   2   1 -11  711.13   61.19
   2   1 -11  698.53   55.29
   2  -1 -11  724.03   61.59
   2  -1 -11  742.23   55.29
   2   1 -10   49.00   19.50
   2   1 -10   34.70   11.80
   2  -1 -10   32.30   11.10
   2  -1 -10   37.00   19.90
   2   1  -9 1017.00   73.09
   2   1  -9  971.60   75.89
   2  -1  -9  995.70   72.89
   2  -1  -9  960.20   75.99
   2   1  -8  350.26   27.70
   2   1  -8  347.57   39.20
   2  -1  -8  344.57   27.50
   2  -1  -8  344.07   40.70
   2   1  -7   24.30   12.50
   2  -1  -7   30.90    7.00
   2  -1  -7   22.30   12.90
   2   1  -6   74.89   12.20
   2   1  -6   79.19    8.60
   2  -1  -6   62.19   12.30
   2  -1  -6   72.29    8.00
   2   1  -5   82.59    8.10
   2   1  -5   63.79   11.00
   2  -1  -5   68.99   11.30
   2   1  -4  193.18   17.60
   2  -1  -4  183.08   17.80
   2   1  -3 8819.52  635.04
   2  -1  -3 8716.63  635.14
  -2   1   2 1647.34  128.79
   2   1  -2 1713.03  128.89
  -2   1   2 1881.71  129.09
   2   1  -2 1828.42  128.99
  -2  -1   2 1701.53  128.99
   2  -1  -2 1717.23  128.89
  -2  -1   2 1869.11  129.09
   2   1  -1  133.19   13.40
  -2   1   1  143.49   13.40
  -2  -1   1  134.69   13.20
   2  -1  -1  143.29   13.70
  -2   1   0   18.00    5.30
   2   1   0   16.20    4.70
  -2  -1   0   16.60    4.80
   2  -1   0   22.90    5.50
   2  -1   0   17.30    5.80
  -2   1  -1   80.59    9.80
   2   1   1   87.79    8.40
   2   1   1   92.39    9.20
  -2   1  -1   89.19   10.30
   2  -1   1   84.79   10.30
   2  -1   1   90.69    9.70
  -2  -1  -1   66.79    8.50
  -2  -1  -1   82.69    8.90
  -2   1  -2 1989.60  151.38
  -2   1  -2 2136.69  151.28
  -2  -1  -2 2127.29  151.28
  -2   1  -3  365.46   28.50
  -2   1  -3  365.06   27.90
  -2  -1  -3  379.06   27.90
  -2  -1  -3  350.36   28.50
  -2   1  -4  120.59   12.50
  -2   1  -4  118.69   15.30
  -2  -1  -4  127.79   12.30
  -2  -1  -4  116.39   14.90
  -2   1  -5 1963.90  148.39
  -2   1  -5 2075.09  147.89
  -2  -1  -5 2004.60  148.39
  -2  -1  -5 2083.49  147.79
  -2   1  -6  552.54   41.90
  -2   1  -6  558.14   43.50
  -2  -1  -6  543.55   43.80
  -2  -1  -6  558.94   42.00
  -2   1  -7  550.54   44.50
  -2   1  -7  555.14   42.30
  -2  -1  -7  558.34   42.60
  -2  -1  -7  554.14   45.10
  -2   1  -8   24.30   10.50
  -2   1  -8   30.90   15.00
  -2  -1  -8   29.10   14.60
  -2  -1  -8   20.00   10.20
  -2   1  -9  186.28   22.80
  -2   1  -9  181.78   20.90
  -2  -1  -9  196.78   19.00
  -2  -1  -9  163.98   22.70
  -2   1 -10   73.99   16.40
  -2   1 -10   80.39   21.30
  -2  -1 -10   73.39   21.10
  -2   1 -11  534.75   43.40
  -2   1 -11  527.15   49.40
  -2  -1 -11  498.55   42.90
  -2  -1 -11  500.85   49.30
  -2   1 -12   62.29   27.40
  -2   1 -12   31.90   18.60
  -2  -1 -12   37.00   21.80
  -2  -1 -12   63.59   27.30
   2   2 -12   88.69   26.90
   2  -2 -12   85.49   27.50
   2   2 -11  351.16   40.50
   2   2 -11  359.96   32.90
   2  -2 -11  400.36   41.10
   2   2 -10   43.10   19.70
   2   2 -10   64.79   12.40
   2  -2 -10   47.00   10.70
   2  -2 -10   44.10   21.40
   2   2  -9   77.39   11.50
   2   2  -9   81.09   18.30
   2  -2  -9   69.39   10.30
   2  -2  -9   78.99   18.00
   2   2  -8 1238.48   88.39
   2  -2  -8 1261.17   88.09
   2  -2  -8 1065.69   94.99
   2   2  -7  570.94   46.60
   2   2  -7  577.54   43.60
   2  -2  -7  579.94   46.60
   2  -2  -7  592.74   43.20
   2   2  -6   24.60    7.10
   2   2  -6   20.80   11.00
   2  -2  -6   25.50   11.00
   2   2  -5  465.05   36.60
   2   2  -5  476.45   34.80
   2  -2  -5  451.85   36.60
   2   2  -4  448.46   35.00
   2   2  -4  468.65   34.40
   2  -2  -4  444.16   35.10
   2   2  -3   66.59    8.20
   2  -2  -3   60.79    8.60
   2   2  -2  222.08   20.80
   2   2  -2  217.58   19.70
  -2   2   2  214.98   19.90
  -2   2   2  240.28   20.50
   2  -2  -2  210.18   19.90
  -2  -2   2  236.18   20.60
  -2  -2   2  223.28   20.40
   2   2  -1 3517.75  249.48
  -2   2   1 3606.14  249.48
   2   2  -1 3051.29  249.88
   2  -2  -1 3664.13  249.48
  -2  -2   1 3325.57  249.38
   2   2   0 1595.34  124.39
   2   2   0 1608.24  123.89
  -2   2   0 1759.12  124.19
   2  -2   0 1722.03  124.19
   2  -2   0 1822.72  124.29
  -2   2  -1    6.20    5.80
   2   2   1    4.60    4.60
   2   2   1    4.20    4.20
  -2   2  -1    6.30    5.70
   2  -2   1    9.30    5.90
  -2  -2  -1    4.30    4.60
   2  -2   1    8.40    5.90
  -2  -2  -1    3.20    4.70
  -2   2  -2 1478.85  108.09
  -2  -2  -2 1495.65  108.09
  -2   2  -3 1427.36  100.79
  -2   2  -3 1366.56  101.09
  -2  -2  -3 1413.66  100.69
  -2  -2  -3 1322.47  100.99
  -2   2  -4  601.84   45.60
  -2   2  -4  602.54   46.50
  -2  -2  -4  649.83   45.40
  -2  -2  -4  586.74   46.20
  -2   2  -5   34.40    8.00
  -2   2  -5   45.20   10.40
  -2  -2  -5   40.30   10.10
  -2  -2  -5   42.50    7.90
  -2   2  -6 1042.90   78.29
  -2   2  -6 1070.79   77.29
  -2  -2  -6 1035.60   78.39
  -2  -2  -6 1044.20   77.09
  -2   2  -7 1207.28   92.59
  -2   2  -7 1292.07   91.29
  -2  -2  -7 1236.28   92.39
  -2  -2  -7 1229.38   91.09
  -2   2  -8  196.78   25.80
  -2   2  -8  186.18   20.20
  -2  -2  -8  186.18   25.40
  -2  -2  -8  192.88   19.20
  -2   2  -9  118.09   15.20
  -2   2  -9  114.49   20.20
  -2  -2  -9  128.09   14.50
  -2  -2  -9  114.99   20.10
  -2   2 -10  160.78   23.50
  -2   2 -10  147.79   18.50
  -2  -2 -10  155.08   24.00
  -2  -2 -10  151.28   19.00
  -2   2 -11   35.60   23.20
  -2   2 -11   37.20   15.30
  -2  -2 -11   67.49   23.90
  -2  -2 -11   22.10   14.80
  -2   2 -12   22.60   27.10
  -2   2 -12   -7.20   20.80
  -2  -2 -12   12.30   25.70
   2   3 -12  112.99   27.70
   2  -3 -12  120.69   28.70
   2   3 -11  191.78   26.90
   2   3 -11  190.28   19.70
   2  -3 -11  184.08   29.10
   2   3 -10  248.78   22.90
   2   3 -10  206.28   25.80
   2  -3 -10  198.18   20.90
   2  -3 -10  212.08   26.40
   2   3  -9  345.37   28.60
   2   3  -9  341.67   33.80
   2  -3  -9  341.37   27.10
   2  -3  -9  319.67   35.80
   2   3  -8  548.05   41.50
   2  -3  -8  546.15   41.00
   2   3  -7 1054.49   77.39
   2   3  -7 1048.30   78.99
   2  -3  -7 1031.80   79.09
   2  -3  -7 1078.89   76.99
   2   3  -6   64.89    8.90
   2   3  -6   80.69   12.30
   2  -3  -6   62.89   12.70
   2   3  -5   33.90    7.20
   2   3  -5   35.30   10.00
   2  -3  -5   36.70   10.60
   2   3  -4 1136.99   79.39
   2   3  -4 1073.89   79.89
   2  -3  -4 1050.09   79.99
   2   3  -3  516.85   38.70
   2  -3  -3  511.25   38.80
   2   3  -2 3214.08  229.88
  -2   3   2 3122.49  229.58
  -2   3   2 3286.87  229.68
   2   3  -2 2980.20  229.58
  -2  -3   2 3059.49  229.68
  -2  -3   2 3145.59  229.78
   2  -3  -2 3288.07  229.68
   2   3  -1  285.37   23.30
  -2   3   1  270.77   23.20
   2   3  -1  257.17   22.80
  -2   3   1  279.37   23.30
   2  -3  -1  295.97   23.40
   2  -3  -1  274.27   23.20
  -2  -3   1  277.37   22.90
  -2  -3   1  268.87   23.50
   2   3   0  134.19   12.90
  -2   3   0  127.59   13.40
  -2  -3   0  124.49   13.10
   2  -3   0  136.99   13.80
   2  -3   0  136.89   13.70
   2   3   1 2805.42  195.58
  -2   3  -1 2622.04  195.88
  -2   3  -1 2573.64  195.78
   2  -3   1 2685.23  195.88
  -2  -3  -1 2724.33  195.48
   2  -3   1 2613.74  195.88
  -2  -3  -1 2823.62  195.58
  -2   3  -2  701.53   52.49
   2  -3   2  710.53   53.19
  -2  -3  -2  736.03   52.49
  -2   3  -3   63.49    8.00
  -2   3  -3   71.89    9.00
  -2  -3  -3   76.79    8.70
  -2  -3  -3   57.49    7.70
  -2   3  -4  644.64   48.50
  -2   3  -4  651.43   47.80
  -2  -3  -4  628.14   48.40
  -2  -3  -4  643.64   47.60
  -2   3  -5  609.04   45.30
  -2   3  -5  593.34   46.30
  -2  -3  -5  583.64   46.20
  -2  -3  -5  617.54   44.90
  -2   3  -6 1369.06  101.49
  -2   3  -6 1379.96  100.49
  -2  -3  -6 1351.76  100.39
  -2  -3  -6 1392.56  101.49
  -2   3  -7  104.09   12.70
  -2   3  -7  119.39   16.00
  -2  -3  -7  118.79   15.80
  -2  -3  -7   92.39   11.70
  -2   3  -8   31.50   10.90
  -2   3  -8   36.40   15.00
  -2  -3  -8   19.10    9.80
  -2  -3  -8   29.40   15.30
  -2   3  -9  269.17   30.30
  -2  -3  -9  256.17   24.30
  -2  -3  -9  221.28   31.60
  -2   3 -10  237.18   24.60
  -2   3 -10  264.07   31.90
  -2  -3 -10  222.48   25.30
  -2  -3 -10  201.98   27.80
  -2   3 -11   37.60   16.30
  -2   3 -11   50.49   24.90
  -2  -3 -11   30.40   23.70
  -2  -3 -11   19.80   16.10
  -2   3 -12  156.78   29.40
  -2   3 -12  134.89   24.00
  -2  -3 -12  145.09   29.50
   2   4 -12  252.17   35.20
   2   4 -12  240.38   27.30
   2  -4 -12  255.57   35.40
   2   4 -11   97.09   23.90
   2   4 -11   95.59   15.30
   2  -4 -11   87.99   24.00
   2   4 -10  320.57   27.70
   2   4 -10  297.37   34.50
   2  -4 -10  323.17   34.40
   2  -4 -10  285.87   27.00
   2   4  -9  137.19   14.80
   2   4  -9  133.99   20.00
   2  -4  -9  121.89   12.40
   2  -4  -9  136.39   20.70
   2   4  -8  600.74   44.40
   2  -4  -8  571.94   43.50
   2   4  -7  446.86   33.90
   2   4  -7  463.95   36.70
   2  -4  -7  437.56   36.80
   2  -4  -7  415.66   33.00
   2   4  -6 1136.69   83.49
   2   4  -6 1137.69   82.39
   2  -4  -6 1098.49   83.59
   2   4  -5  102.19   12.40
   2   4  -5   99.49   10.50
   2  -4  -5   95.79   12.80
   2   4  -4 1440.56  106.69
   2   4  -4 1522.95  106.19
   2  -4  -4 1407.86  106.69
   2   4  -3   77.59    8.90
   2   4  -3   73.79    8.60
   2  -4  -3   77.59    9.80
   2  -4  -2 1337.87   97.69
  -2   4   1 1275.67   96.19
   2   4  -1 1322.97   96.29
   2   4  -1 1304.97   96.19
  -2   4   1 1247.08   96.09
   2  -4  -1 1408.66   96.29
  -2  -4   1 1343.97   96.39
  -2  -4   1 1279.97   96.19
   2  -4  -1 1271.17   96.19
  -2   4   0 1125.99   83.39
  -2   4   0 1113.29   83.49
   2  -4   0 1112.79   83.59
  -2  -4   0 1154.48   83.29
   2  -4   0 1171.08   83.59
  -2   4  -1 1105.09   78.69
   2  -4   1 1055.79   79.09
  -2   4  -2 4752.22  352.06
   2  -4   2 4859.81  352.36
  -2  -4  -2 4964.60  351.96
  -2   4  -3   34.90    6.60
  -2  -4  -3   39.80    7.20
  -2  -4  -3   32.50    6.40
  -2   4  -4 3426.76  251.27
  -2   4  -4 3434.46  251.67
  -2  -4  -4 3461.45  251.47
  -2  -4  -4 3532.75  251.17
  -2   4  -5  666.03   50.19
  -2   4  -5  638.14   48.70
  -2  -4  -5  646.14   49.50
  -2  -4  -5  659.53   48.50
  -2   4  -6  720.73   54.09
  -2   4  -6  701.23   52.59
  -2  -4  -6  703.23   54.09
  -2  -4  -6  688.93   52.29
  -2   4  -7  579.14   43.20
  -2   4  -7  559.84   45.50
  -2  -4  -7  553.44   45.50
  -2  -4  -7  564.94   43.00
  -2   4  -8  286.37   28.90
  -2   4  -8  257.37   23.70
  -2  -4  -8  252.87   28.90
  -2  -4  -8  254.77   23.50
  -2   4  -9  128.09   16.90
  -2   4  -9  119.69   20.80
  -2  -4  -9  123.99   20.30
  -2  -4  -9  113.59   14.00
  -2   4 -10  362.56   39.30
  -2   4 -10  328.77   31.50
  -2  -4 -10  320.47   31.20
  -2  -4 -10  343.57   38.40
  -2   4 -11    4.20   22.70
  -2   4 -11   24.90   19.50
  -2  -4 -11   13.90   24.50
  -2  -4 -11   -6.90   16.80
  -2   4 -12  106.99   28.20
  -2   4 -12  129.79   21.40
  -2  -4 -12  111.39   29.00
   2   5 -12    6.70   16.50
   2   5 -12   14.20   26.40
   2  -5 -12   18.50   27.10
   2   5 -11    2.10   22.40
   2   5 -11    6.60   14.30
   2  -5 -11    6.70   23.70
   2   5 -10  208.78   22.30
   2   5 -10  199.28   26.30
   2  -5 -10  177.18   18.10
   2  -5 -10  211.38   26.00
   2   5  -9   35.10   17.70
   2   5  -9   37.00   11.30
   2  -5  -9   24.80    7.70
   2  -5  -9   39.10   18.60
   2   5  -8   13.20   18.50
   2   5  -8   -3.50    9.80
   2  -5  -8   -0.80    6.20
   2   5  -7 2459.65  176.68
   2   5  -7 2440.66  177.58
   2  -5  -7 2384.46  177.78
   2   5  -6  104.09   11.20
   2   5  -6   97.09   13.70
   2  -5  -6  101.79   14.20
   2   5  -5 1124.99   84.29
   2   5  -5 1186.38   83.69
   2  -5  -5 1112.79   84.49
   2   5  -4  292.97   24.50
   2   5  -4  297.67   23.90
   2  -5  -4  305.57   25.00
   2   5  -3  145.09   14.00
   2   5  -3  156.78   14.40
   2  -5  -3  144.69   15.50
   2   5  -2  493.35   35.30
   2  -5  -2  449.86   35.80
  -2   5   1  584.34   47.50
  -2   5   1  581.54   47.10
   2   5  -1  650.13   47.70
   2   5  -1  641.94   47.50
  -2  -5   1  663.43   47.70
   2  -5  -1  587.14   47.20
  -2  -5   1  621.94   47.30
   2  -5  -1  634.44   47.50
   2   5   0 2016.70  136.99
   2   5   0 1876.61  137.09
  -2   5   0 1761.82  137.09
  -2   5   0 1781.92  136.99
   2  -5   0 1874.41  137.09
   2  -5   0 1943.51  137.19
   2  -5   1 9961.10  721.43
  -2   5  -2    4.10    5.40
   2  -5   2    1.30    7.90
  -2   5  -3 1620.84  119.49
  -2  -5  -3 1614.24  119.59
  -2  -5  -3 1689.03  119.39
  -2   5  -4 1106.19   82.09
  -2   5  -4 1109.99   81.49
  -2  -5  -4 1112.29   81.89
  -2  -5  -4 1120.99   81.29
  -2   5  -5   94.99   12.80
  -2   5  -5  105.69   10.90
  -2  -5  -5   95.89   10.20
  -2  -5  -5   88.59   12.60
  -2   5  -6   34.80    9.00
  -2   5  -6   30.60   11.80
  -2  -5  -6   30.70   11.90
  -2  -5  -6   29.60    7.90
  -2   5  -7  706.33   57.89
  -2   5  -7  744.83   54.39
  -2  -5  -7  700.83   53.69
  -2  -5  -7  720.33   55.99
  -2   5  -8   -3.60   15.50
  -2   5  -8   14.40   11.10
  -2  -5  -8   10.60    9.10
  -2  -5  -8    8.70   14.90
  -2   5  -9  811.12   62.29
  -2   5  -9  842.72   65.59
  -2  -5  -9  832.82   65.29
  -2  -5  -9  812.32   61.89
  -2   5 -10    8.80   20.40
  -2   5 -10    7.30   14.50
  -2  -5 -10   19.60   20.20
  -2  -5 -10   15.50   13.50
  -2   5 -11   42.30   24.00
  -2   5 -11   22.00   19.80
  -2  -5 -11   24.80   24.90
  -2  -5 -11   30.00   18.40
  -2   5 -12   45.50   28.20
  -2  -5 -12   51.79   26.90
   2   6 -12  360.96   49.60
   2   6 -12  389.66   37.10
   2  -6 -12  427.46   47.90
   2   6 -11  254.77   30.10
   2   6 -11  247.28   31.10
   2  -6 -11  261.37   30.80
   2   6 -10  373.06   33.60
   2   6 -10  374.76   40.60
   2  -6 -10  403.16   39.40
   2   6  -9  129.59   21.90
   2   6  -9  156.08   16.60
   2  -6  -9  157.78   14.70
   2  -6  -9  137.79   22.00
   2   6  -8   54.09   15.50
   2   6  -8   63.49   11.20
   2  -6  -8   59.89   25.40
   2  -6  -8   48.60    7.40
   2   6  -7  109.59   12.40
   2   6  -7  104.09   15.20
   2  -6  -7   91.19   16.40
   2   6  -6  776.02   58.39
   2   6  -6  756.82   57.19
   2  -6  -6  774.62   58.99
   2   6  -5 1103.09   78.49
   2   6  -5 1043.50   78.99
   2  -6  -5 1056.49   79.49
   2   6  -4 2785.22  203.08
   2   6  -4 2863.11  202.88
   2  -6  -4 2732.63  203.18
   2   6  -3   74.39    8.70
   2   6  -3   67.09    9.00
   2  -6  -3   73.49    9.90
   2   6  -2  101.49   10.90
   2  -6  -2   73.99   10.20
   2   6  -1  130.99   11.40
   2  -6  -1  116.09   13.10
   2   6   0  531.85   39.70
   2  -6   0  544.55   41.00
  -2   6  -1  948.81   69.89
   2   6   1  981.00   69.89
   2  -6   1  940.41   70.49
  -2   6  -2 3404.76  250.17
   2   6   2 3496.95  250.07
   2  -6   2 3450.25  250.57
  -2   6  -3 1862.01  135.99
  -2  -6  -3 1852.61  136.09
   2  -6   3 1895.01  136.59
  -2   6  -4 2520.75  184.68
  -2  -6  -4 2592.54  184.48
  -2  -6  -4 2512.05  184.88
  -2   6  -5   56.09   11.40
  -2   6  -5   52.69    9.50
  -2  -6  -5   52.39    8.10
  -2  -6  -5   63.09   10.80
  -2   6  -6   30.10    9.30
  -2   6  -6   33.10   11.70
  -2  -6  -6   25.20    7.70
  -2  -6  -6   26.80   11.80
  -2   6  -7   21.50    9.70
  -2  -6  -7    8.70    8.20
  -2  -6  -7   12.20   12.90
  -2   6  -8   75.79   13.20
  -2   6  -8   69.79   16.60
  -2  -6  -8   81.19   11.20
  -2  -6  -8   72.19   16.60
  -2   6  -9   87.79   19.30
  -2   6  -9   36.20   12.90
  -2  -6  -9   25.90   18.20
  -2  -6  -9   22.20   10.80
  -2   6 -10  603.14   48.70
  -2   6 -10  581.94   54.19
  -2  -6 -10  612.34   52.79
  -2  -6 -10  598.54   47.90
  -2   6 -11   38.00   25.10
  -2   6 -11   32.80   16.50
  -2  -6 -11   53.89   25.10
   2   7 -12  164.98   30.50
   2   7 -12  153.78   25.10
   2  -7 -12  143.79   30.70
   2   7 -11   24.70   23.60
   2   7 -11   36.30   14.40
   2  -7 -11   37.90   23.70
   2   7 -10   12.00   12.80
   2   7 -10    0.60   19.20
   2  -7 -10   19.40   19.70
   2   7  -9   22.30   17.50
   2   7  -9   23.90   11.50
   2  -7  -9    7.70   18.70
   2   7  -8  325.37   27.90
   2   7  -8  328.47   31.40
   2  -7  -8  323.27   33.60
   2   7  -7  734.73   56.89
   2   7  -7  741.53   54.99
   2  -7  -7  718.73   56.89
   2   7  -6  883.21   64.19
   2   7  -6  860.71   65.39
   2  -7  -6  848.52   65.79
   2   7  -5 2010.70  149.69
   2   7  -5 2126.99  149.29
   2  -7  -5 2013.90  149.79
   2   7  -4  482.65   36.40
   2   7  -4  455.15   36.10
   2  -7  -4  465.05   36.70
   2   7  -3  767.22   58.29
   2   7  -3  790.12   58.19
   2  -7  -3  805.12   58.79
   2   7  -2  286.57   21.80
   2  -7  -2  251.57   22.60
   2   7  -1 1348.86  102.19
   2  -7  -1 1462.45  102.89
  -2   7   0   20.50    5.20
   2   7   0   26.90    5.40
   2  -7   0   48.90    9.30
   2   7   1 1524.85  107.79
  -2   7  -1 1509.35  107.79
   2  -7   1 1413.66  108.29
  -2   7  -2 1644.74  121.89
   2   7   2 1717.03  121.79
   2  -7   2 1666.53  122.49
   2   7   3  568.94   41.30
  -2   7  -3  536.05   41.70
   2  -7   3  571.04   43.00
  -2  -7  -3  555.24   41.90
  -2   7  -4  108.59   11.20
  -2  -7  -4  100.19   14.00
  -2   7  -5   12.20    8.40
  -2  -7  -5   -0.50    6.80
  -2  -7  -5   12.00    9.90
  -2   7  -6  247.18   24.50
  -2   7  -6  239.08   21.70
  -2  -7  -6  246.88   21.00
  -2  -7  -6  245.48   24.40
  -2   7  -7   89.99   12.50
  -2   7  -7   91.89   16.10
  -2  -7  -7   99.89   11.20
  -2  -7  -7   91.49   15.50
  -2   7  -8  466.95   40.10
  -2  -7  -8  462.25   39.80
  -2  -7  -8  424.16   35.30
  -2   7  -9 1090.89   81.49
  -2   7  -9 1074.99   79.19
  -2  -7  -9 1016.40   78.09
  -2  -7  -9 1029.10   81.69
  -2   7 -10  253.27   28.90
  -2   7 -10  269.47   35.70
  -2  -7 -10  273.67   34.40
  -2  -7 -10  277.07   26.50
  -2   7 -11    5.50   17.00
  -2   7 -11    7.00   26.50
  -2  -7 -11   15.00   25.10
   2   8 -12  170.58   22.20
   2   8 -12  165.08   30.40
   2  -8 -12  146.79   31.30
   2   8 -11  446.46   38.10
   2   8 -11  492.85   53.29
   2  -8 -11  391.46   49.10
   2   8 -10    7.40   19.40
   2  -8 -10  -11.50   21.40
   2   8  -9   99.09   14.60
   2   8  -9   81.09   19.10
   2  -8  -9   90.89   19.90
   2   8  -8   20.30   14.60
   2   8  -8    8.60   11.10
   2  -8  -8   18.60   17.20
   2   8  -7  120.39   16.30
   2   8  -7  126.69   14.10
   2  -8  -7  124.99   18.00
   2   8  -6  153.28   17.00
   2   8  -6  174.48   20.40
   2  -8  -6  154.08   21.40
   2   8  -5 2116.89  150.98
   2   8  -5 2060.19  151.28
   2  -8  -5 2038.90  151.48
   2   8  -4 4495.95  325.07
   2   8  -4 4404.26  324.97
   2  -8  -4 4541.45  325.27
   2   8  -3 1625.74  118.49
   2   8  -3 1589.74  118.59
   2  -8  -3 1661.03  118.89
   2   8  -2 1061.99   79.99
   2  -8  -2 1120.59   80.39
   2   8  -1  168.58   15.00
   2  -8  -1  173.38   18.00
  -2   8   0  683.73   48.70
   2   8   0  643.54   48.60
   2  -8   0  655.73   49.90
   2   8   1  641.44   46.40
  -2   8  -1  642.64   46.40
   2  -8   1  599.04   47.40
   2   8   2 1395.26   98.59
  -2   8  -2 1357.06   98.69
   2  -8   2 1305.67   99.39
   2   8   3 1434.96  104.09
  -2  -8  -3 1437.16  104.39
   2  -8   3 1416.66  105.19
  -2   8  -4  314.87   25.30
   2   8   4  324.87   24.20
  -2  -8  -4  309.77   25.70
   2  -8   4  284.27   28.30
  -2   8  -5  419.66   33.30
  -2  -8  -5  433.36   34.40
  -2   8  -6    8.70    9.70
  -2  -8  -6   27.20   11.90
  -2   8  -7   20.10   10.30
  -2   8  -7   10.50   13.80
  -2  -8  -7   16.00   13.80
  -2   8  -8  309.87   29.80
  -2   8  -8  354.96   34.90
  -2  -8  -8  351.86   33.60
  -2   8  -9  196.08   24.70
  -2   8  -9  191.38   19.80
  -2  -8  -9  195.88   24.00
  -2   8 -10  374.16   35.70
  -2   8 -10  388.46   42.00
  -2  -8 -10  424.96   41.80
  -2   8 -11  299.27   32.70
  -2  -8 -11  326.47   42.00
   2   9 -12   91.79   18.20
   2   9 -12  113.99   29.90
   2  -9 -12   92.79   29.90
   2   9 -11  118.99   18.30
   2   9 -11  135.59   26.40
   2  -9 -11  117.69   28.00
   2   9 -10   74.89   14.80
   2   9 -10   58.59   22.40
   2  -9 -10   49.40   22.40
   2   9  -9  262.57   25.00
   2   9  -9  250.17   29.80
   2  -9  -9  215.58   30.50
   2   9  -8  258.77   24.10
   2   9  -8  239.18   27.00
   2  -9  -8  235.78   28.70
   2   9  -7   17.70   11.00
   2   9  -7   12.60   13.40
   2  -9  -7   11.10   14.80
   2   9  -6 2353.46  164.88
   2   9  -6 2221.18  165.28
   2  -9  -6 2208.78  165.38
   2   9  -5  304.07   24.80
   2   9  -5  295.57   25.30
   2  -9  -5  273.57   26.50
   2   9  -4  158.58   15.80
   2   9  -4  147.79   14.90
   2  -9  -4  142.39   17.70
   2   9  -3 2611.44  193.18
   2   9  -3 2663.73  192.98
   2  -9  -3 2696.13  193.38
   2   9  -2   81.49    9.70
   2  -9  -2   55.19   11.30
   2   9  -1   35.70    6.60
   2  -9  -1   33.80   10.80
  -2   9   0 3806.02  260.07
   2   9   0 3408.36  260.07
   2  -9   0 3549.54  260.57
   2   9   1    7.10    5.30
  -2   9  -1    5.70    5.90
   2  -9   1   14.20    8.90
  -2   9  -2  417.06   32.40
   2   9   2  442.76   32.10
   2  -9   2  421.96   33.90
  -2   9  -3   24.50    7.80
   2   9   3   33.90    6.60
   2  -9   3   30.30   10.70
  -2  -9  -3   39.70    8.30
   2   9   4  147.49   13.40
  -2   9  -4  130.59   15.40
   2  -9   4  137.99   18.90
  -2  -9  -4  145.29   16.50
   2   9   5  744.93   54.79
  -2   9  -5  733.43   55.39
  -2  -9  -5  742.33   55.99
  -2   9  -6    4.10    9.70
  -2  -9  -6    7.80   11.90
  -2   9  -7   -2.70   10.50
  -2  -9  -7   -9.60   13.70
  -2   9  -8  766.92   59.59
  -2  -9  -8  790.42   61.49
  -2   9  -9  125.49   16.50
  -2  -9  -9  112.09   20.90
  -2   9 -10  366.46   35.30
  -2  -9 -10  397.36   41.40
  -2   9 -11  128.19   20.10
  -2  -9 -11  105.19   27.70
   2  10 -12   -1.20   27.20
   2  10 -12    9.60   17.00
   2 -10 -12    9.00   28.70
   2  10 -11  100.99   17.60
   2  10 -11   90.29   25.70
   2 -10 -11   77.89   27.40
   2  10 -10  189.78   26.10
   2  10 -10  170.18   20.40
   2 -10 -10  185.58   26.40
   2  10  -9   57.29   14.50
   2  10  -9   62.49   18.50
   2 -10  -9   53.69   20.10
   2  10  -8  657.33   50.89
   2  10  -8  679.13   53.99
   2 -10  -8  627.54   54.09
   2  10  -7    8.30   11.30
   2  10  -7   18.60   13.20
   2 -10  -7    8.30   15.00
   2  10  -6  304.87   26.90
   2  10  -6  292.07   28.00
   2 -10  -6  320.67   28.60
   2  10  -5 1367.06  101.79
   2  10  -5 1402.76  101.49
   2 -10  -5 1379.96  102.09
   2  10  -4   19.30   10.00
   2  10  -4   56.59    9.40
   2 -10  -4   37.30   11.50
   2  10  -3 1476.55  112.29
   2  10  -3 1576.34  112.19
   2 -10  -3 1556.44  112.69
   2  10  -2  733.53   54.39
   2 -10  -2  724.23   55.19
  -2  10   1  259.77   20.20
   2  10  -1  252.47   20.90
   2 -10  -1  247.88   23.50
   2  10   0 3148.89  240.28
  -2  10   0 3499.75  240.38
   2 -10   0 3293.37  240.98
  -2  10  -1  472.35   34.50
   2  10   1  454.65   34.30
   2 -10   1  437.46   36.30
   2  10   2   23.00    5.80
  -2  10  -2    0.50    7.00
   2 -10   2   14.20    9.50
   2  10   3  252.67   20.10
  -2  10  -3  238.28   21.20
  -2 -10  -3  256.97   21.60
   2 -10   3  236.88   24.20
  -2  10  -4   70.49   10.20
   2  10   4   57.89    8.10
  -2 -10  -4   64.19   10.70
   2 -10   4   46.70   12.40
  -2  10  -5  582.34   44.30
   2  10   5  564.94   43.30
   2 -10   5  577.74   46.10
  -2 -10  -5  587.64   45.00
  -2  10  -6  814.82   60.19
   2  10   6  787.72   59.09
  -2 -10  -6  792.62   60.79
  -2  10  -7  351.76   31.40
   2  10   7  338.27   28.40
  -2 -10  -7  371.96   32.80
   2  10   8  548.75   41.10
  -2  10  -8  507.75   42.40
  -2 -10  -8  536.35   45.30
  -2  10  -9   88.49   17.50
   2  10   9  115.39   15.10
  -2 -10  -9  172.08   22.10
  -2  10 -10   22.50   16.10
  -2 -10 -10   70.39   22.00
  -2  10 -11  228.08   27.90
  -2 -10 -11  263.97   32.30
   2  11 -12   14.20   19.30
   2  11 -12   18.50   29.30
   2 -11 -12   19.50   29.10
   2  11 -11  165.38   30.00
   2  11 -11  174.98   21.70
   2 -11 -11  189.88   30.00
   2  11 -10  132.59   19.40
   2  11 -10  190.08   24.50
   2 -11 -10  142.29   25.80
   2  11  -9  755.92   60.19
   2  11  -9  811.92   62.49
   2 -11  -9  762.32   64.09
   2  11  -8   84.49   17.30
   2  11  -8   71.69   14.60
   2 -11  -8   76.89   18.90
   2  11  -7   24.90   12.10
   2  11  -7   22.20   14.10
   2 -11  -7   29.50   16.10
   2  11  -6  829.72   63.39
   2  11  -6  865.31   62.99
   2 -11  -6  817.62   64.39
   2  11  -5 1106.69   80.79
   2  11  -5 1093.29   81.09
   2 -11  -5 1077.09   81.69
   2  11  -4  129.39   15.40
   2  11  -4  108.69   13.80
   2 -11  -4  114.19   15.20
   2  11  -3 1003.70   74.69
   2 -11  -3 1014.90   75.09
  -2  11   2 1637.64  118.39
   2  11  -2 1593.34  118.59
  -2 -11   2 1603.64  118.29
   2 -11  -2 1654.23  119.09
   2  11  -1 1760.42  135.89
  -2  11   1 1927.51  135.69
   2 -11  -1 1910.31  136.69
   2  11   0  572.14   44.10
  -2  11   0  601.04   44.10
   2 -11   0  604.24   46.20
   2  11   1   19.70    6.10
  -2  11  -1    3.20    7.10
   2 -11   1   28.10   10.60
  -2  11  -2  233.88   21.20
   2  11   2  271.87   20.30
   2 -11   2  232.28   23.90
   2  11   3  349.77   25.70
  -2  11  -3  306.87   26.70
   2 -11   3  309.37   28.80
  -2 -11  -3  336.97   26.60
   2  11   4  185.88   16.80
  -2  11  -4  184.28   18.30
   2 -11   4  171.88   21.40
  -2 -11  -4  193.68   18.50
   2  11   5 2148.58  157.18
  -2  11  -5 2188.38  157.68
   2 -11   5 2171.28  158.78
  -2 -11  -5 2139.99  157.88
   2  11   6  322.67   26.60
  -2  11  -6  346.77   28.60
  -2 -11  -6  345.77   30.20
   2 -11   6  316.97   33.10
   2  11   7   18.80    8.90
  -2  11  -7   15.40   14.70
  -2 -11  -7   14.70   14.50
  -2  11  -8  314.37   28.90
   2  11   8  346.17   27.10
  -2 -11  -8  279.67   32.90
   2  11   9   58.39   12.70
  -2  11  -9   44.70   14.70
  -2 -11  -9   50.59   19.60
  -2  11 -10   20.90   16.30
  -2 -11 -10   32.80   21.80
  -2  11 -11  117.29   21.10
  -2 -11 -11  126.19   27.80
   2  12 -12   -2.30   18.40
   2  12 -12   11.10   32.00
   2 -12 -12    2.60   29.60
   2  12 -11   -1.30   24.50
   2  12 -11   10.60   17.10
   2 -12 -11    5.40   26.30
   2  12 -10   54.19   16.70
   2  12 -10   68.79   21.90
   2 -12 -10   77.69   23.20
   2  12  -9  426.16   37.10
   2  12  -9  421.86   41.50
   2 -12  -9  426.26   42.80
   2  12  -8  989.20   74.89
   2  12  -8  985.00   75.99
   2 -12  -8 1003.80   76.69
   2  12  -7  298.97   27.60
   2  12  -7  294.87   28.50
   2 -12  -7  286.97   30.20
   2  12  -6   -2.00   11.60
   2  12  -6    1.00   11.80
   2 -12  -6    2.40   14.20
   2  12  -5   76.09   12.30
   2  12  -5   82.09   12.70
   2 -12  -5   83.09   14.60
   2  12  -4  301.67   24.50
   2  12  -4  239.08   24.90
   2 -12  -4  289.27   25.90
   2  12  -3  -10.60    9.80
   2 -12  -3  -15.00   11.70
  -2  12   2  113.59   10.40
   2  12  -2  144.99   15.30
   2 -12  -2   79.29   15.00
  -2 -12   2  105.49   13.90
   2  12  -1 2430.26  183.78
  -2  12   1 2600.54  183.58
   2 -12  -1 2554.64  184.58
   2  12   0 1467.55  112.59
  -2  12   0 1605.24  112.59
   2 -12   0 1561.44  113.69
   2  12   1  252.57   20.20
  -2  12  -1  211.98   20.70
   2 -12   1  265.07   23.30
   2  12   2  208.48   17.20
  -2  12  -2  170.78   18.60
   2 -12   2  206.88   21.80
  -2  12  -3  101.69   11.90
   2  12   3  105.09   11.60
  -2 -12  -3   97.09   11.70
   2 -12   3   71.89   14.20
   2  12   4  112.59   13.20
  -2  12  -4  141.69   13.90
   2 -12   4  118.29   16.20
  -2 -12  -4  117.69   16.40
   2  12   5  226.48   20.50
  -2  12  -5  250.37   22.40
  -2 -12  -5  254.27   23.90
   2 -12   5  216.88   26.80
   2  12   6 1878.01  132.19
  -2  12  -6 1852.61  132.89
  -2 -12  -6 1878.51  133.29
   2 -12   6 1617.94  136.39
   2  12   7  769.62   56.29
  -2  12  -7  742.93   57.49
   2 -12   7  744.63   60.09
  -2 -12  -7  742.33   58.89
  -2  12  -8   63.89   14.90
   2  12   8   73.29   11.60
  -2 -12  -8   52.69   18.40
  -2  12  -9   19.60   14.90
   2  12   9   14.20   11.90
  -2 -12  -9   16.20   19.60
  -2  12 -10   67.79   18.00
  -2 -12 -10   61.39   23.80
  -2  12 -11   45.50   18.70
  -2 -12 -11   23.60   25.30
   2  13 -12   -4.90   19.30
   2  13 -12    6.20   30.80
   2 -13 -12    1.10   28.90
   2  13 -11   40.50   17.70
   2  13 -11   34.00   27.10
   2 -13 -11   17.00   26.70
   2  13 -10  946.11   74.29
   2  13 -10  892.51   71.29
   2 -13 -10  938.31   74.89
   2  13  -9  334.87   36.20
   2  13  -9  313.27   31.50
   2 -13  -9  301.57   37.60
   2  13  -8   56.29   23.50
   2  13  -8   74.99   17.30
   2 -13  -8   68.39   19.30
   2  13  -7   55.19   13.20
   2 -13  -7   30.30   17.20
   2  13  -6   59.39   13.70
   2  13  -6   68.29   13.90
   2 -13  -6   76.49   16.20
   2  13  -5  217.58   21.10
   2  13  -5  191.98   21.30
   2 -13  -5  187.58   23.70
   2  13  -4 1060.59   81.09
   2 -13  -4 1124.39   81.79
  -2  13   3  132.59   15.20
   2  13  -3  161.78   18.60
   2 -13  -3  192.98   18.40
  -2 -13   3  186.68   18.60
   2  13  -2 1325.07   96.69
  -2  13   2 1284.57   95.99
  -2 -13   2 1348.37   96.29
   2 -13  -2 1299.97   97.39
  -2  13   1 1248.38   92.59
   2  13  -1 1275.27   92.99
   2 -13  -1 1274.27   94.09
   2  13   0  607.24   47.00
  -2  13   0  591.14   47.10
   2 -13   0  689.33   49.30
   2  13   1  233.08   18.90
  -2  13  -1  190.58   19.80
   2 -13   1  240.78   22.70
   2  13   2  270.87   19.20
  -2  13  -2  211.18   20.80
   2 -13   2  227.28   22.90
  -2 -13  -2  204.78   20.00
  -2  13  -3  277.97   24.80
   2  13   3  296.77   22.80
   2 -13   3  247.98   26.60
  -2 -13  -3  304.87   24.20
  -2  13  -4 2743.13  195.78
   2  13   4 2697.33  195.28
   2 -13   4 2599.54  196.38
  -2 -13  -4 2713.03  195.68
  -2  13  -5  466.15   36.60
   2  13   5  441.76   35.10
   2 -13   5  446.66   39.90
  -2 -13  -5  467.95   37.40
   2  13   6  498.45   38.70
  -2  13  -6  505.55   41.40
   2 -13   6  476.15   48.20
  -2 -13  -6  518.15   41.70
  -2  13  -7   -3.40   12.90
   2  13   7    5.30    9.50
  -2 -13  -7    2.60   15.20
   2 -13   7   10.10   18.70
   2  13   8    2.30   11.60
  -2  13  -8   -8.70   14.40
   2 -13   8    7.90   19.80
  -2 -13  -8  -14.90   17.40
   2  13   9    5.90   12.60
  -2  13  -9    6.30   15.90
   2 -13   9    3.40   21.80
  -2 -13  -9    3.90   19.70
  -2  13 -10   41.10   17.20
   2 -13  10   31.10   28.60
  -2 -13 -10   63.89   23.10
  -2  13 -11   13.20   17.80
   2 -13  11   19.20   28.30
  -2 -13 -11    9.90   25.60
   2  14 -12   15.80   33.70
   2 -14 -12   22.40   29.80
   2  14 -11   14.50   28.00
   2  14 -11   15.30   17.90
   2 -14 -11   20.10   27.20
   2  14 -10   95.69   19.20
   2  14 -10  119.99   26.50
   2 -14 -10  107.09   26.30
   2  14  -9 1134.09   84.69
   2  14  -9 1111.39   86.79
   2 -14  -9 1099.39   87.39
   2  14  -8  109.19   20.50
   2  14  -8  125.79   17.60
   2 -14  -8  111.79   21.80
   2  14  -7  694.33   52.79
   2  14  -7  675.33   53.59
   2 -14  -7  658.63   55.19
   2  14  -6  112.99   15.90
   2  14  -6  110.19   16.20
   2 -14  -6  110.29   18.70
   2  14  -5   -4.50   11.90
   2 -14  -5   -3.40   14.00
   2  14  -4  243.08   23.50
  -2  14   4  245.98   21.70
   2  14  -3  175.98   19.70
  -2  14   3  171.88   17.00
   2 -14  -3  175.88   22.40
  -2 -14   3  228.48   20.10
  -2  14   2  148.69   13.50
   2  14  -2  173.58   17.80
  -2 -14   2  168.68   17.10
   2 -14  -2  106.49   17.20
   2  14  -1 2190.28  158.88
  -2  14   1 2187.98  158.58
   2 -14  -1 2207.28  159.78
  -2 -14   1 2137.39  158.68
  -2  14   0   27.60    8.60
   2  14   1 2050.09  152.18
  -2  14  -1 2176.88  152.38
   2 -14   1 2046.70  153.18
  -2  14  -2    6.10    9.50
   2  14   2   44.90    7.60
   2 -14   2   35.40   12.80
  -2 -14  -2   13.60    8.70
   2  14   3  364.56   27.70
  -2  14  -3  355.76   29.30
   2 -14   3  320.07   31.70
  -2 -14  -3  353.26   28.80
  -2  14  -4   95.89   12.90
   2  14   4   90.19   10.40
  -2 -14  -4   91.99   13.00
   2 -14   4   70.99   15.50
   2  14   5 1088.29   80.59
  -2  14  -5 1129.49   81.69
   2 -14   5 1060.19   83.19
  -2 -14  -5 1107.99   81.89
   2  14   6  290.97   25.70
  -2  14  -6  309.17   28.50
   2 -14   6  305.57   33.40
  -2 -14  -6  323.47   29.60
   2  14   7 1012.80   73.59
  -2  14  -7  978.50   74.79
   2 -14   7  936.51   77.29
  -2 -14  -7 1038.00   76.09
   2  14   8    2.40   11.50
  -2  14  -8    1.10   15.20
  -2 -14  -8   -4.50   17.60
   2 -14   8   -6.60   20.50
  -2  14  -9  127.09   19.40
   2  14   9  133.69   16.90
   2 -14   9  111.89   25.40
  -2 -14  -9  127.39   23.10
  -2  14 -10   39.50   17.60
   2 -14  10   51.99   27.40
  -2 -14 -10   65.59   24.20
  -2  14 -11    4.40   19.80
  -2 -14 -11   -0.90   26.30
   2 -14  11  -14.00   28.40
   2  15 -11   46.30   18.40
   2  15 -11   15.00   26.70
   2 -15 -11   41.20   28.10
   2  15 -10  778.82   71.99
   2  15 -10  789.92   61.19
   2 -15 -10  751.82   67.69
   2  15  -9  129.49   23.20
   2  15  -9  120.49   19.90
   2 -15  -9  113.79   24.80
   2  15  -8  180.18   21.00
   2  15  -8  188.78   24.20
   2 -15  -8  159.68   24.90
   2  15  -7   58.69   24.40
   2 -15  -7   33.00   24.30
   2  15  -6  132.09   17.50
   2 -15  -6  147.99   19.90
   2  15  -5 1008.80   78.29
   2 -15  -5 1084.29   78.99
  -2  15   4 1027.30   76.49
   2  15  -4 1043.30   77.49
   2 -15  -4 1074.79   78.39
  -2 -15   4 1037.10   78.09
   2  15  -3  164.68   19.20
  -2  15   3  160.68   16.20
  -2 -15   3  194.28   18.80
   2 -15  -3  158.38   22.00
  -2  15   2  983.60   75.79
   2  15  -2 1067.69   76.59
   2 -15  -2 1015.40   77.59
  -2 -15   2 1058.89   76.29
  -2  15   1  275.57   27.40
   2  15  -1  363.46   28.60
  -2 -15   1  383.66   28.70
   2 -15  -1  338.47   30.70
  -2  15   0  266.27   25.40
   2  15   0  348.37   25.70
  -2  15  -1  413.96   33.90
   2  15   1  465.75   33.20
  -2 -15  -1  375.16   34.30
   2 -15   1  456.65   36.20
   2  15   2  169.98   15.60
  -2  15  -2  156.08   15.60
  -2 -15  -2  128.79   16.40
   2 -15   2  150.58   18.00
  -2  15  -3   45.40   11.70
   2  15   3   71.29    9.40
   2 -15   3   69.89   14.60
  -2 -15  -3   69.29   11.60
  -2  15  -4 2287.67  164.58
   2  15   4 2255.67  164.08
  -2 -15  -4 2326.57  164.58
   2 -15   4 2145.89  165.28
  -2  15  -5  218.28   22.60
   2  15   5  200.48   19.20
  -2 -15  -5  196.68   23.20
   2 -15   5  232.58   27.30
  -2  15  -6  405.16   33.30
   2  15   6  355.36   31.20
  -2 -15  -6  409.26   34.80
   2 -15   6  370.36   37.70
  -2  15  -7  103.89   16.10
   2  15   7   87.09   13.10
  -2 -15  -7   93.99   17.90
   2 -15   7   73.79   20.60
   2  15   8  -11.20   11.90
  -2  15  -8   -1.30   15.30
  -2 -15  -8   -4.20   18.40
   2 -15   8   -8.10   21.90
   2  15   9  310.07   30.00
  -2  15  -9  293.17   30.90
  -2 -15  -9  299.17   37.80
   2 -15   9  278.37   33.70
  -2  15 -10    4.10   17.70
  -2 -15 -10   -4.90   23.50
   2 -15  10    2.40   28.40
  -2 -15 -11   19.00   27.40
   2 -15  11   21.70   32.70
   2  16 -11   86.59   21.10
   2 -16 -11   61.89   29.20
   2  16 -10  147.19   21.50
   2 -16 -10  141.99   28.80
   2  16  -9  265.47   29.30
   2 -16  -9  243.58   31.30
   2  16  -8  340.57   34.10
   2 -16  -8  352.96   38.30
   2  16  -7  563.34   44.90
   2 -16  -7  517.55   56.19
   2  16  -6  131.99   18.20
   2 -16  -6  159.48   20.50
   2  16  -5  198.78   22.90
  -2  16   5  209.08   17.90
  -2 -16   5  191.08   24.40
   2 -16  -5  207.88   25.60
   2  16  -4 2026.30  145.59
  -2  16   4 1909.51  144.59
  -2 -16   4 1989.10  145.69
   2 -16  -4 2032.70  146.09
  -2  16   3   85.59   10.50
   2  16  -3   74.79   12.70
   2 -16  -3   78.59   15.60
  -2 -16   3  101.79   13.40
   2  16  -2  119.49   13.90
  -2  16   2  113.39   12.10
  -2 -16   2  112.69   13.60
   2 -16  -2   75.79   16.90
  -2  16   1 1145.59   88.69
   2  16  -1 1192.68   89.09
  -2 -16   1 1291.67   89.19
   2 -16  -1 1196.58   90.39
  -2  16   0  213.38   22.70
   2  16   0  286.37   22.50
  -2 -16   0  242.68   23.10
   2  16   1  687.23   50.69
  -2  16  -1  676.13   50.99
   2 -16   1  700.73   53.09
  -2 -16  -1  633.24   50.49
  -2  16  -2  356.56   29.80
   2  16   2  363.76   28.50
   2 -16   2  340.57   32.70
  -2 -16  -2  356.16   29.10
  -2  16  -3  392.36   33.90
   2  16   3  396.76   32.20
   2 -16   3  416.96   36.50
  -2 -16  -3  434.86   33.30
  -2  16  -4  149.79   16.50
   2  16   4  159.18   15.80
   2 -16   4  127.89   18.60
  -2 -16  -4  138.89   19.40
   2  16   5    9.90    9.10
  -2 -16  -5    4.40   13.40
   2 -16   5   11.60   16.60
  -2  16  -6  238.58   24.90
   2  16   6  194.38   21.50
   2 -16   6  216.38   28.60
  -2 -16  -6  248.68   26.50
   2  16   7  917.81   66.89
  -2  16  -7  884.51   67.99
   2 -16   7  852.31   70.49
  -2 -16  -7  886.41   69.39
   2  16   8   14.10   14.70
  -2  16  -8   35.90   16.60
   2 -16   8   17.20   21.80
  -2 -16  -8   34.10   19.20
   2  16   9   -4.00   16.20
  -2  16  -9   42.00   17.60
  -2 -16  -9   -8.50   21.50
   2 -16   9    7.20   25.20
  -2  16 -10  309.57   33.30
   2 -16  10  299.47   37.70
  -2 -16 -10  313.07   40.70
   2  17 -11  181.68   25.80
   2 -17 -11  157.78   32.70
   2  17 -10  144.79   22.80
   2 -17 -10  118.49   28.20
   2  17  -9  271.47   31.20
   2 -17  -9  214.78   30.90
   2  17  -8   25.40   16.70
   2 -17  -8    5.10   21.00
   2  17  -7   46.90   16.50
   2 -17  -7   48.30   20.50
   2  17  -6  517.05   46.30
  -2  17   6  544.25   42.30
   2 -17  -6  588.74   46.90
   2  17  -5  975.80   75.09
  -2  17   5  997.60   73.29
   2 -17  -5 1026.30   75.69
  -2 -17   5  982.20   75.59
   2  17  -4   16.10   13.40
  -2  17   4   15.20    8.20
  -2 -17   4   -0.50   13.00
   2 -17  -4   18.50   15.10
  -2  17   3   18.10    8.70
   2  17  -3   25.70   12.10
   2 -17  -3   16.70   14.80
  -2 -17   3   23.70   11.90
  -2  17   2  942.71   72.29
   2  17  -2  989.90   72.99
   2 -17  -2  977.60   74.09
  -2 -17   2 1001.60   72.89
  -2  17   1  719.13   59.69
   2  17  -1  805.52   60.39
  -2 -17   1  848.82   60.59
   2 -17  -1  825.92   61.99
   2  17   0 2076.59  156.88
  -2  17   0 2112.09  156.88
  -2 -17   0 2163.78  156.88
   2 -17   0 2256.37  157.98
   2  17   1  321.07   25.30
  -2  17  -1  298.97   26.10
  -2 -17  -1  265.47   25.50
   2 -17   1  322.77   29.20
   2  17   2  294.47   25.10
  -2  17  -2  308.37   26.90
  -2 -17  -2  302.67   26.10
   2 -17   2  313.47   29.30
  -2  17  -3  346.57   30.10
   2  17   3  340.67   28.20
  -2 -17  -3  352.16   29.30
   2 -17   3  345.47   32.90
  -2  17  -4   24.30   13.10
   2  17   4   31.30    9.20
   2 -17   4   26.30   15.60
  -2 -17  -4   14.90   12.40
   2  17   5  108.19   12.70
  -2  17  -5   76.79   15.30
  -2 -17  -5  108.49   16.00
   2  17   6  131.39   15.10
  -2  17  -6  160.98   18.90
   2 -17   6  124.49   21.90
  -2 -17  -6  140.59   19.40
   2  17   7  319.27   28.90
  -2  17  -7  331.77   32.10
   2 -17   7  333.27   38.60
  -2 -17  -7  345.87   34.80
  -2  17  -8  385.16   37.20
   2  17   8  329.27   34.30
  -2 -17  -8  399.76   38.80
   2 -17   8  414.46   41.40
   2  17   9  318.67   34.90
  -2  17  -9  330.77   33.30
  -2 -17  -9  305.47   38.60
   2 -17   9  296.77   41.50
  -2  17 -10  113.29   21.60
  -2 -17 -10  100.49   26.70
   2 -17  10  106.99   32.60
   2  18 -11  122.89   23.90
   2 -18 -11  144.19   31.60
   2  18 -10   73.29   21.00
   2 -18 -10   78.09   27.70
   2  18  -9   10.50   18.80
   2 -18  -9   35.50   23.90
   2  18  -8  154.08   21.70
   2 -18  -8  175.38   26.00
   2  18  -7   91.49   18.40
  -2 -18   7  102.09   20.70
   2 -18  -7   86.49   21.50
  -2  18   6  110.99   11.40
   2  18  -6   73.09   17.10
   2 -18  -6   80.49   20.30
  -2 -18   6  102.89   19.90
  -2  18   5  697.53   52.89
   2  18  -5  671.13   55.89
  -2 -18   5  740.43   55.89
   2 -18  -5  720.13   56.49
  -2  18   4  540.45   40.70
   2  18  -4  524.15   42.70
  -2 -18   4  522.75   43.10
   2 -18  -4  541.65   44.50
   2  18  -3 1536.15  111.69
  -2  18   3 1458.05  110.89
  -2 -18   3 1532.35  111.69
   2 -18  -3 1542.95  112.19
  -2  18   2  449.36   36.50
   2  18  -2  478.35   37.80
   2 -18  -2  458.15   39.80
  -2 -18   2  490.05   38.00
  -2  18   1  990.00   77.69
   2  18  -1 1052.69   78.19
   2 -18  -1 1043.30   79.49
  -2 -18   1 1113.79   78.29
   2  18   0   29.10   11.00
  -2  18   0   25.60   10.60
  -2 -18   0   25.10   11.90
   2 -18   0   44.70   16.30
  -2  18  -1  619.94   48.20
   2  18   1  606.34   47.10
  -2 -18  -1  614.94   47.40
   2 -18   1  640.14   50.49
  -2  18  -2  200.18   21.80
   2  18   2  208.08   20.30
  -2 -18  -2  204.08   20.60
   2 -18   2  213.48   25.10
   2  18   3  689.33   52.59
  -2  18  -3  701.23   53.79
  -2 -18  -3  724.93   53.19
   2 -18   3  666.33   55.19
   2  18   4   72.29   11.20
  -2  18  -4   51.49   16.40
  -2 -18  -4   63.89   13.70
   2 -18   4   50.99   16.70
   2  18   5  458.95   35.80
  -2  18  -5  426.46   38.00
   2 -18   5  417.46   41.40
  -2 -18  -5  463.65   38.10
  -2  18  -6  123.59   19.20
   2  18   6  143.19   15.90
  -2 -18  -6  152.98   19.80
   2 -18   6  160.68   23.40
   2  18   7  221.38   25.20
  -2  18  -7  269.07   28.40
  -2 -18  -7  274.37   31.70
   2 -18   7  262.57   35.60
   2  18   8   35.60   15.70
  -2  18  -8   74.19   18.60
   2 -18   8   89.49   25.10
  -2 -18  -8   49.90   20.90
  -2  18  -9  167.68   23.40
   2 -18   9  180.48   33.20
  -2 -18  -9  167.18   27.00
  -2  18 -10  106.19   21.90
   2 -18  10   89.39   31.20
  -2 -18 -10   74.39   27.20
   2  19 -11  123.49   24.00
   2 -19 -11  101.69   32.50
   2  19 -10   52.79   21.40
   2 -19 -10   40.70   28.40
   2  19  -9  -10.70   20.50
   2 -19  -9   -9.00   24.50
   2  19  -8  214.48   26.00
   2 -19  -8  215.48   29.60
  -2 -19   8  250.37   30.70
  -2  19   7   66.29   13.20
   2  19  -7   26.30   18.20
  -2 -19   7   41.10   21.30
   2 -19  -7   53.99   20.60
   2  19  -6 1129.29   86.09
  -2  19   6 1187.28   83.89
  -2 -19   6 1115.89   86.59
   2 -19  -6 1120.79   87.29
   2  19  -5   61.19   16.10
  -2  19   5   73.19   10.50
   2 -19  -5   50.39   18.30
  -2 -19   5   37.30   16.60
  -2  19   4  138.19   13.80
   2  19  -4  127.09   17.30
   2 -19  -4  138.29   19.50
  -2 -19   4  123.39   18.30
  -2  19   3  303.67   28.60
   2  19  -3  330.07   30.40
   2 -19  -3  397.66   33.00
  -2 -19   3  367.86   31.30
  -2  19   2  124.49   14.20
   2  19  -2  147.89   16.50
   2 -19  -2  125.99   18.80
  -2 -19   2  133.29   17.00
   2  19  -1   65.29   12.40
  -2  19   1   39.40   11.10
   2 -19  -1   49.60   16.90
   2  19   0 1932.11  142.39
  -2  19   0 1896.21  142.19
   2 -19   0 1973.70  143.59
  -2 -19   0 1983.00  142.29
  -2  19  -1   49.00   13.00
   2  19   1   71.39   11.80
  -2 -19  -1   78.49   12.90
   2 -19   1   67.99   17.80
  -2  19  -2 1301.47   93.89
   2  19   2 1264.07   93.29
  -2 -19  -2 1284.67   93.39
   2 -19   2 1209.98   95.39
  -2  19  -3   81.29   14.80
   2  19   3   92.39   11.90
  -2 -19  -3   60.49   13.40
   2 -19   3   74.89   17.70
  -2  19  -4  170.78   19.60
   2  19   4  165.98   19.50
   2 -19   4  189.68   22.60
  -2 -19  -4  160.18   21.60
  -2  19  -5   19.40   15.30
   2  19   5   30.20   10.90
  -2 -19  -5   24.60   15.40
   2 -19   5   19.30   18.80
   2  19   6   18.30   12.30
  -2  19  -6   40.50   16.50
  -2 -19  -6   26.30   17.00
   2 -19   6   28.20   20.20
  -2  19  -7  115.99   19.70
   2  19   7  110.69   16.40
  -2 -19  -7  138.39   21.50
   2 -19   7  109.79   24.10
  -2  19  -8  949.21   73.99
   2  19   8  938.11   72.79
   2 -19   8  938.01   78.59
  -2 -19  -8  974.00   75.29
  -2  19  -9   -5.30   20.80
  -2 -19  -9   -6.60   23.70
   2 -19   9    5.90   26.40
  -2  19 -10  122.89   24.10
  -2 -19 -10  132.29   28.80
   2 -19  10  148.39   34.60
   2  20 -10   18.10   21.70
  -2 -20  10    4.00   28.30
   2 -20 -10   12.80   27.40
   2  20  -9   10.40   20.80
   2 -20  -9   78.59   26.30
  -2 -20   9    7.80   29.80
   2  20  -8   67.09   19.80
  -2 -20   8   44.80   23.60
   2 -20  -8   53.69   24.20
  -2  20   7   20.90   10.60
   2  20  -7    1.70   18.10
  -2 -20   7  -12.50   21.30
   2 -20  -7  -15.00   20.90
   2  20  -6    4.70   16.60
  -2 -20   6   -0.10   18.30
   2 -20  -6   24.50   24.70
  -2  20   5  777.92   58.39
   2  20  -5  754.32   60.69
   2 -20  -5  790.72   61.99
  -2 -20   5  793.62   61.79
  -2  20   4  238.68   21.80
  -2 -20   4  242.38   27.20
   2 -20  -4  225.28   28.20
   2  20  -3  881.61   65.99
  -2  20   3  878.31   64.79
  -2 -20   3  869.21   66.29
   2 -20  -3  843.62   67.29
   2  20  -2  148.39   17.70
  -2  20   2  142.49   15.90
  -2 -20   2  154.98   18.70
   2 -20  -2  181.38   24.00
  -2  20   1  221.98   22.70
   2  20  -1  234.38   23.60
  -2 -20   1  246.38   24.90
   2 -20  -1  246.68   27.60
   2  20   0  206.08   21.80
  -2  20   0  200.98   21.60
   2 -20   0  209.18   27.40
  -2 -20   0  214.88   22.40
  -2  20  -1  335.17   30.20
   2  20   1  340.37   29.60
  -2 -20  -1  362.36   29.80
   2 -20   1  344.77   33.50
   2  20   2  117.79   13.60
  -2  20  -2   90.59   15.40
  -2 -20  -2  112.89   14.60
   2 -20   2   77.89   19.30
   2  20   3 1950.01  142.19
  -2  20  -3 1981.10  143.29
   2 -20   3 1840.82  143.69
  -2 -20  -3 2004.40  142.39
   2  20   4   37.30   11.30
  -2  20  -4   11.30   15.10
  -2 -20  -4   33.80   14.30
   2 -20   4   19.40   23.00
   2  20   5  250.67   24.30
  -2  20  -5  273.87   28.40
   2 -20   5  235.08   30.90
  -2 -20  -5  266.57   28.20
   2  20   6   78.19   14.30
  -2  20  -6   88.09   18.80
  -2 -20  -6  102.99   19.20
   2 -20   6  110.69   24.40
   2  20   7   20.70   13.90
  -2  20  -7   20.40   17.90
  -2 -20  -7   17.80   19.60
   2 -20   7   26.90   22.80
   2  20   8  -12.60   16.80
  -2  20  -8   27.00   19.20
   2 -20   8   19.90   25.90
  -2 -20  -8   24.40   21.60
  -2  20  -9  216.48   25.70
   2 -20   9  164.08   34.40
  -2 -20  -9  167.98   29.30
  -2  20 -10   44.30   23.50
   2 -20  10   36.40   31.80
  -2 -20 -10   31.60   27.70
   2  21 -10  236.58   30.70
  -2 -21  10  255.67   36.50
   2 -21 -10  239.58   35.70
   2  21  -9  104.99   24.00
  -2 -21   9  135.59   34.20
   2 -21  -9  174.58   29.20
   2  21  -8  178.08   24.90
   2 -21  -8  171.38   28.00
  -2 -21   8  150.18   26.50
   2  21  -7  117.29   21.80
   2 -21  -7  136.09   24.70
  -2 -21   7  129.09   23.60
  -2  21   6  951.30   66.29
   2  21  -6  839.02   68.89
   2 -21  -6  844.92   73.99
   2  21  -5  581.44   48.60
  -2  21   5  594.64   45.60
  -2 -21   5  616.74   49.70
   2 -21  -5  585.44   50.19
   2  21  -4   17.60   14.80
  -2  21   4   42.20   11.10
  -2 -21   4   34.30   16.50
   2 -21  -4   36.10   17.90
   2  21  -3    1.60   16.90
  -2  21   3   11.00   10.90
   2 -21  -3    5.80   17.00
  -2 -21   3    0.70   15.30
  -2  21   2   36.80   11.50
   2  21  -2   28.40   13.40
  -2 -21   2   20.60   15.30
   2 -21  -2   32.70   17.40
   2  21  -1  416.26   35.70
  -2  21   1  421.36   34.80
   2 -21  -1  434.06   38.70
  -2 -21   1  448.76   36.80
   2  21   0  114.19   15.90
  -2  21   0  129.89   15.90
   2 -21   0  117.59   20.70
  -2 -21   0  133.59   16.60
   2  21   1  431.06   36.50
  -2  21  -1  413.56   36.40
  -2 -21  -1  460.85   35.80
   2 -21   1  438.86   40.30
   2  21   2 2333.67  169.58
  -2  21  -2 2295.97  169.98
  -2 -21  -2 2388.66  169.58
   2 -21   2 2273.77  171.28
   2  21   3  472.55   38.60
  -2  21  -3  473.05   40.10
   2 -21   3  501.05   44.00
  -2 -21  -3  475.35   39.50
  -2  21  -4  187.88   21.50
   2  21   4  168.48   18.10
   2 -21   4  168.88   25.10
  -2 -21  -4  169.38   23.40
  -2  21  -5   68.99   17.60
   2  21   5   83.39   14.10
  -2 -21  -5   80.09   17.70
   2 -21   5   62.89   21.70
  -2  21  -6    6.50   17.80
   2  21   6   -5.40   13.20
   2 -21   6    8.40   22.20
  -2 -21  -6   -3.80   18.20
  -2  21  -7   99.59   20.50
   2  21   7   82.09   16.40
   2 -21   7   83.09   27.20
  -2 -21  -7   82.49   21.70
   2  21   8  470.05   44.90
  -2  21  -8  474.55   44.40
   2 -21   8  474.75   52.69
  -2 -21  -8  502.25   47.70
  -2  21  -9  124.69   24.50
  -2 -21  -9  127.19   27.30
   2 -21   9  120.69   33.10
   2  22 -10   86.99   24.60
  -2 -22  10   63.29   33.20
   2 -22 -10   60.99   29.80
   2  22  -9  142.59   26.40
   2 -22  -9  184.78   31.70
  -2 -22   9  164.98   37.30
   2  22  -8   85.19   22.80
  -2 -22   8  104.69   25.90
   2 -22  -8   95.99   27.00
   2  22  -7   96.59   21.60
   2 -22  -7  120.29   24.20
  -2 -22   7  112.29   25.50
   2  22  -6  141.99   23.50
  -2  22   6  229.58   21.00
  -2 -22   6  199.18   27.30
   2 -22  -6  197.68   25.80
   2  22  -5   76.19   18.60
  -2  22   5  105.69   13.40
  -2 -22   5   80.79   20.30
   2 -22  -5   80.99   20.70
   2  22  -4  415.76   37.70
  -2  22   4  448.96   35.40
  -2 -22   4  444.76   38.70
   2 -22  -4  411.56   39.90
  -2  22   3   45.60   11.90
   2  22  -3   28.40   14.40
   2 -22  -3   39.80   18.00
  -2 -22   3   26.60   17.40
   2  22  -2  269.97   28.30
  -2  22   2  289.37   25.70
  -2 -22   2  268.67   29.00
   2 -22  -2  281.67   30.40
   2  22  -1  232.88   22.90
  -2  22   1  198.18   22.60
  -2 -22   1  180.88   25.10
   2 -22  -1  217.78   27.40
  -2  22   0   60.49   13.70
   2  22   0   57.99   14.20
  -2 -22   0   71.19   14.90
   2 -22   0   48.40   19.20
  -2  22  -1  108.99   17.30
   2  22   1  128.79   16.60
  -2 -22  -1  146.69   16.60
   2 -22   1  136.89   21.80
  -2  22  -2  563.94   51.39
   2  22   2  567.74   44.90
   2 -22   2  570.44   49.50
  -2 -22  -2  580.44   45.40
   2  22   3 1476.35  110.09
  -2  22  -3 1497.85  110.79
  -2 -22  -3 1536.15  110.29
   2 -22   3 1458.05  112.69
  -2  22  -4  361.56   38.10
   2  22   4  503.65   36.60
  -2 -22  -4  403.56   37.50
   2 -22   4  420.36   42.30
  -2  22  -5   71.09   19.30
   2  22   5   89.89   15.90
  -2 -22  -5  103.69   19.50
   2 -22   5  100.99   23.40
   2  22   6   85.99   16.50
  -2  22  -6   76.39   20.50
   2 -22   6   78.19   24.60
  -2 -22  -6  139.79   21.00
   2  22   7    9.50   16.00
  -2  22  -7   58.09   20.20
   2 -22   7   18.10   26.30
  -2 -22  -7   18.10   25.20
  -2  22  -8   72.19   21.50
   2  22   8   25.50   19.50
  -2 -22  -8   46.80   23.50
   2 -22   8   41.00   29.10
  -2  22  -9   37.30   23.20
  -2 -22  -9   -5.70   25.60
   2 -22   9   31.90   31.90
   2  23 -10  523.35   48.80
   2 -23 -10  475.55   55.29
  -2 -23  10  481.95   60.69
   2  23  -9   39.90   24.00
  -2 -23   9   27.90   30.90
   2 -23  -9   51.69   28.40
   2  23  -8   31.10   21.50
   2 -23  -8   13.40   25.70
  -2 -23   8   12.00   25.60
   2  23  -7  528.95   47.70
   2 -23  -7  538.65   50.29
  -2 -23   7  543.05   51.19
  -2  23   6  206.78   21.10
   2  23  -6  143.79   23.70
  -2 -23   6  185.68   26.20
   2 -23  -6  169.48   26.00
  -2  23   5   68.39   13.50
   2  23  -5   29.20   17.30
  -2 -23   5   52.49   20.10
   2 -23  -5   35.30   27.00
  -2  23   4  537.75   43.00
   2  23  -4  544.25   45.10
  -2 -23   4  592.34   47.40
   2 -23  -4  493.15   46.70
  -2  23   3  237.48   24.10
   2  23  -3  245.58   26.40
  -2 -23   3  244.88   30.20
   2 -23  -3  212.98   29.60
  -2  23   2  338.47   30.60
   2  23  -2  371.36   31.90
   2 -23  -2  343.57   34.90
  -2 -23   2  355.66   34.60
   2  23  -1   51.09   14.50
  -2  23   1   57.49   13.70
  -2 -23   1   52.39   16.80
   2 -23  -1   47.90   18.60
  -2  23   0   -3.90   13.70
   2  23   0  -11.80   13.30
   2 -23   0   -0.70   19.10
  -2 -23   0    2.90   14.40
   2  23   1  548.05   43.20
  -2  23  -1  502.45   43.40
   2 -23   1  538.15   47.40
  -2 -23  -1  550.14   43.20
   2  23   2  231.48   24.30
  -2  23  -2  211.58   25.90
  -2 -23  -2  244.98   24.90
   2 -23   2  230.88   30.60
  -2  23  -3  413.56   39.30
   2  23   3  484.55   38.30
  -2 -23  -3  461.15   38.70
  -2  23  -4  416.56   38.20
   2  23   4  402.96   36.10
  -2 -23  -4  434.96   37.70
   2 -23   4  433.56   43.20
   2  23   5    9.10   13.90
  -2  23  -5  -10.00   17.60
  -2 -23  -5    2.30   18.50
   2 -23   5   10.70   23.60
  -2  23  -6  231.48   27.10
   2  23   6  214.88   23.90
   2 -23   6  288.97   36.00
  -2 -23  -6  227.58   31.30
   2  23   7  279.07   32.00
  -2  23  -7  302.07   34.70
  -2 -23  -7  319.47   40.30
   2 -23   7  292.87   40.60
  -2  23  -8   28.50   22.10
  -2 -23  -8  -29.50   24.00
   2 -23   8   15.20   28.90
  -2  23  -9  102.09   25.20
   2 -23   9   73.09   35.90
  -2 -23  -9   63.59   27.40
   2  24  -9  345.67   40.70
   2 -24  -9  332.57   46.70
  -2 -24   9  401.86   50.09
   2  24  -8   26.60   22.40
   2 -24  -8   14.80   26.50
  -2 -24   8   26.00   31.40
   2  24  -7  703.93   60.49
   2 -24  -7  725.13   62.29
  -2 -24   7  766.92   62.69
  -2  24   6  244.78   23.20
   2  24  -6  167.98   26.00
  -2 -24   6  209.88   28.80
   2 -24  -6  183.88   27.60
   2  24  -5   -8.40   17.10
  -2  24   5   24.20   12.70
  -2 -24   5  -15.40   20.90
   2 -24  -5  -11.50   25.60
   2  24  -4  133.59   20.50
  -2  24   4  150.48   16.60
  -2 -24   4  136.69   23.20
   2 -24  -4  141.69   23.10
  -2  24   3   45.70   13.40
   2  24  -3   47.10   16.70
  -2 -24   3   47.80   19.90
   2 -24  -3   35.40   19.70
   2  24  -2  171.48   20.10
  -2  24   2  190.28   21.60
  -2 -24   2  155.48   23.10
   2 -24  -2  190.28   23.70
  -2  24   1  954.50   72.99
   2  24  -1  978.90   73.49
  -2 -24   1  979.60   74.19
   2 -24  -1  977.80   75.39
  -2  24   0   -2.00   14.40
   2  24   0   34.90   16.40
  -2 -24   0   36.40   15.20
   2 -24   0   54.19   20.30
   2  24   1  310.37   30.90
  -2 -24  -1  322.37   30.10
   2 -24   1  318.77   36.30
   2  24   2  165.08   18.70
  -2  24  -2  140.49   19.90
   2 -24   2  161.38   26.00
  -2 -24  -2  154.58   18.90
   2  24   3  161.28   18.90
  -2  24  -3  112.89   20.50
   2 -24   3  147.99   26.50
  -2 -24  -3  167.18   19.90
  -2  24  -4  297.27   31.70
   2  24   4  290.67   29.40
   2 -24   4  252.37   35.80
  -2 -24  -4  315.07   30.90
  -2  24  -5  177.68   25.20
   2  24   5  221.28   23.90
  -2 -24  -5  276.47   30.00
   2 -24   5  204.38   30.20
   2  24   6    5.70   17.20
  -2  24  -6   15.90   19.90
  -2 -24  -6   28.60   20.30
   2 -24   6   24.10   27.70
  -2  24  -7  435.96   43.20
   2  24   7  422.96   40.90
  -2 -24  -7  466.35   45.80
   2 -24   7  424.06   50.89
  -2  24  -8   19.00   23.40
   2 -24   8  -12.30   36.40
  -2 -24  -8    0.50   29.00
  -2  24  -9  -11.00   25.10
  -2 -24  -9  -37.70   26.10
   2 -24   9  -17.60   34.50
   2  25  -9   39.00   25.20
  -2 -25   9   55.69   33.30
   2 -25  -9   63.29   30.00
   2  25  -8  323.27   37.80
  -2 -25   8  331.87   42.70
   2 -25  -8  295.27   36.70
   2  25  -7  112.79   24.10
   2 -25  -7  120.39   26.90
  -2 -25   7  119.19   26.80
  -2  25   6   21.40   14.20
   2  25  -6    8.80   20.40
  -2 -25   6  -16.70   24.20
   2 -25  -6  -18.10   22.60
   2  25  -5   -6.00   18.60
  -2 -25   5  -13.00   22.40
   2 -25  -5  -19.10   21.10
   2  25  -4  234.48   26.20
  -2  25   4  255.87   25.00
   2 -25  -4  207.38   30.20
  -2 -25   4  261.57   33.50
  -2  25   3   31.80   13.60
   2  25  -3   33.70   16.90
  -2 -25   3   21.60   20.50
   2 -25  -3   33.40   20.10
   2  25  -2 1784.12  130.99
  -2  25   2 1805.22  130.39
  -2 -25   2 1826.02  131.79
   2 -25  -2 1678.63  131.69
  -2  25   1  138.19   18.30
   2  25  -1  141.89   19.10
   2 -25  -1  137.59   23.10
  -2 -25   1  133.09   20.80
   2  25   0  123.59   17.80
  -2  25   0  120.39   18.40
  -2 -25   0  141.49   18.70
   2 -25   0  128.69   23.80
  -2  25  -1  168.28   22.00
  -2 -25  -1  186.38   24.40
   2 -25   1  223.48   27.30
   2  25   2   85.49   16.90
  -2  25  -2   62.59   17.70
  -2 -25  -2  101.59   16.60
   2 -25   2   90.19   38.80
   2  25   3   -4.80   15.60
  -2  25  -3  -14.10   16.90
  -2 -25  -3  -12.90   15.70
   2 -25   3  -10.10   23.10
   2  25   4  321.27   31.60
  -2  25  -4  282.67   33.60
   2 -25   4  326.97   41.30
  -2 -25  -4  326.77   32.60
  -2  25  -5  116.49   22.10
   2  25   5  121.49   19.40
  -2 -25  -5  160.98   22.90
   2 -25   5  134.99   28.20
  -2  25  -6  491.25   47.70
   2  25   6  559.84   45.60
  -2 -25  -6  537.65   47.60
   2 -25   6  491.95   54.49
   2  25   7  -31.10   20.00
  -2  25  -7   18.90   22.90
  -2 -25  -7   28.40   23.00
   2 -25   7   15.40   34.30
  -2  25  -8   41.40   24.10
   2 -25   8   -9.70   30.90
  -2 -25  -8  -10.00   26.00
   2  26  -9  151.48   29.00
   2 -26  -9  145.39   33.30
  -2 -26   9  153.18   45.80
   2  26  -8  264.37   32.30
  -2 -26   8  247.88   41.50
   2 -26  -8  256.57   34.30
   2  26  -7  567.04   53.89
   2 -26  -7  579.64   55.79
  -2 -26   7  690.53   60.09
   2  26  -6  -29.50   20.00
  -2  26   6   31.60   14.70
   2 -26  -6   -5.30   24.10
  -2 -26   6  -13.60   24.70
   2  26  -5  -13.80   18.60
  -2  26   5   16.90   14.00
   2 -26  -5  -19.40   21.80
   2  26  -4   -5.60   18.20
  -2  26   4   12.80   14.00
  -2 -26   4   15.50   22.10
   2 -26  -4   -6.80   25.60
  -2  26   3   28.60   14.30
   2  26  -3   13.00   16.80
   2 -26  -3   19.50   20.30
  -2 -26   3   -1.60   21.00
  -2  26   2  227.78   26.30
   2  26  -2  230.08   26.40
  -2 -26   2  198.38   26.60
   2 -26  -2  235.88   30.20
  -2  26   1  988.80   75.79
   2  26  -1 1014.00   76.49
  -2 -26   1 1016.60   77.09
   2 -26  -1 1003.50   78.39
   2  26   0  262.57   27.90
  -2 -26   0  265.27   28.60
   2 -26   0  262.37   33.80
  -2  26  -1   72.79   17.70
  -2 -26  -1   92.29   21.10
   2 -26   1   67.09   29.70
  -2  26  -2    7.80   17.60
   2  26   2   23.90   16.80
   2 -26   2   44.90   24.80
  -2 -26  -2   25.20   15.60
  -2  26  -3  -30.80   17.50
  -2 -26  -3  -10.10   16.60
   2 -26   3  -31.50   24.10
   2  26   4    9.60   21.00
  -2  26  -4   11.10   19.20
  -2 -26  -4   -3.20   18.00
   2 -26   4   -9.10   26.40
  -2  26  -5   31.50   20.50
   2  26   5   45.70   18.40
  -2 -26  -5   46.80   20.20
   2 -26   5   39.00   28.20
   2  26   6  216.48   27.20
  -2  26  -6  175.28   27.10
  -2 -26  -6  200.18   26.40
   2 -26   6  197.38   33.20
   2  26   7  500.25   50.99
  -2  26  -7  496.35   48.80
   2 -26   7  509.85   55.19
  -2 -26  -7  536.45   50.09
  -2  26  -8   88.49   26.80
  -2 -26  -8  104.99   28.20
   2 -26   8   81.29   37.30
   2  27  -8   65.19   26.10
  -2 -27   8   45.70   37.90
   2  27  -7  101.59   26.10
   2 -27  -7  112.59   27.90
  -2 -27   7   99.29   33.10
   2  27  -6   46.50   23.10
  -2  27   6   56.79   20.10
   2 -27  -6   32.00   24.70
  -2 -27   6   47.00   29.20
  -2  27   5   17.50   14.80
   2  27  -5   -4.70   20.10
   2 -27  -5   -6.40   22.60
  -2 -27   5  -17.30   25.70
   2  27  -4  127.79   21.40
  -2  27   4  121.99   17.40
  -2 -27   4   91.89   26.00
   2 -27  -4   91.59   23.60
   2  27  -3 1247.58   93.79
  -2  27   3 1315.97   92.79
   2 -27  -3 1078.49  102.09
  -2 -27   3 1264.17   95.79
  -2  27   2  652.23   49.10
   2  27  -2  631.74   49.90
   2 -27  -2  563.44   53.69
  -2 -27   2  575.74   52.59
   2  27  -1  233.98   27.30
  -2  27   1  207.28   32.10
   2 -27  -1  252.37   32.90
  -2 -27   1  225.48   29.40
  -2  27   0  159.58   21.00
   2  27   0  150.58   20.80
  -2 -27   0  175.48   21.20
   2 -27   0  162.28   37.60
   2  27   1   -9.90   15.50
  -2  27  -1   -5.20   17.10
  -2 -27  -1    1.40   16.50
   2 -27   1  -30.90   23.80
  -2  27  -2   -3.10   17.20
   2  27   2    3.00   15.70
   2 -27   2   -5.40   24.80
  -2 -27  -2   24.20   16.30
  -2  27  -3  336.07   35.00
   2  27   3  360.66   34.40
  -2 -27  -3  329.47   34.30
   2 -27   3  342.57   44.00
   2  27   4   72.79   18.80
  -2  27  -4   46.90   20.10
   2 -27   4   50.29   27.50
  -2 -27  -4   61.89   19.10
  -2  27  -5  227.68   28.50
   2  27   5  240.18   27.80
  -2 -27  -5  267.97   32.80
   2 -27   5  216.38   36.30
   2  27   6  148.19   25.20
  -2  27  -6  152.88   26.80
   2 -27   6  171.78   35.30
  -2 -27  -6  201.48   26.30
  -2  27  -7  152.48   29.30
   2  27   7  194.88   29.80
  -2 -27  -7  223.38   29.30
   2 -27   7  195.08   37.80
  -2  27  -8   14.10   25.80
   2 -27   8   -6.20   46.10
  -2 -27  -8   -1.10   28.50
   2  28  -8  229.38   31.50
  -2 -28   8  225.18   37.80
   2 -28  -8  207.18   34.30
   2  28  -7   73.89   25.40
  -2 -28   7   91.79   34.80
   2 -28  -7   64.99   27.20
   2  28  -6   49.90   22.50
  -2 -28   6   56.49   30.80
   2 -28  -6   61.29   25.90
  -2  28   5   77.79   16.70
   2  28  -5   50.79   20.80
   2 -28  -5   52.69   23.90
  -2 -28   5   50.09   28.70
  -2  28   4   19.30   16.20
   2  28  -4    9.90   18.90
  -2 -28   4    0.10   26.00
   2 -28  -4   20.50   22.40
  -2  28   3  135.29   18.40
   2  28  -3   99.59   20.90
   2 -28  -3  115.99   23.70
  -2 -28   3   81.39   27.00
  -2  28   2  397.36   45.10
   2  28  -2  429.66   37.20
   2 -28  -2  404.96   40.70
  -2 -28   2  354.66   40.50
  -2  28   1   93.09   17.40
   2  28  -1   82.29   18.30
  -2 -28   1   62.29   20.40
   2 -28  -1   82.39   26.10
  -2  28   0  460.35   40.60
   2  28   0  488.25   41.90
  -2 -28   0  472.65   40.90
   2 -28   0  441.56   45.50
   2  28   1   -2.70   17.10
  -2  28  -1  -14.80   18.00
   2 -28   1  -28.30   25.10
  -2 -28  -1   18.20   16.90
   2  28   2  101.39   19.60
  -2  28  -2  101.39   20.70
  -2 -28  -2  125.59   19.40
   2 -28   2   84.79   28.40
  -2  28  -3  237.18   26.70
   2  28   3  253.97   26.30
   2 -28   3  227.28   33.50
  -2 -28  -3  219.08   29.60
   2  28   4   13.80   19.00
  -2  28  -4   -4.00   20.40
   2 -28   4  -11.20   30.40
  -2 -28  -4   -9.30   18.10
   2  28   5  -24.20   22.10
  -2  28  -5  -17.20   21.80
  -2 -28  -5    1.30   21.00
   2 -28   5  -33.60   30.20
   2  28   6  297.47   32.20
  -2  28  -6  285.07   33.10
  -2 -28  -6  283.07   37.20
   2 -28   6  316.37   44.00
  -2  28  -7   62.59   25.40
   2 -28   7   71.79   42.00
  -2 -28  -7   82.49   39.60
   2  29  -8   69.89   27.90
  -2 -29   8   42.10   34.40
   2 -29  -8   73.19   30.40
   2  29  -7   41.30   25.60
  -2 -29   7   26.80   32.00
   2 -29  -7   27.60   27.60
   2  29  -6  239.08   29.20
   2 -29  -6  200.88   31.00
  -2 -29   6  207.18   37.80
   2  29  -5    8.50   21.90
  -2  29   5   29.10   17.30
  -2 -29   5   -7.20   30.80
   2 -29  -5   -2.50   24.20
   2  29  -4    6.30   19.50
  -2  29   4   -7.70   17.00
   2 -29  -4   30.60   23.20
   2  29  -3  798.02   60.29
  -2  29   3  762.22   61.19
   2 -29  -3  687.73   62.09
  -2 -29   3  737.63   64.89
  -2  29   2    4.50   17.10
   2  29  -2   13.40   18.20
  -2 -29   2  -45.60   22.40
   2 -29  -2   24.50   22.10
  -2  29   1   60.49   18.90
   2  29  -1   98.39   19.60
  -2 -29   1   90.49   20.90
   2 -29  -1  118.39   24.00
  -2  29   0   82.69   20.00
   2  29   0   84.09   19.20
   2 -29   0   80.49   25.60
  -2 -29   0  131.09   19.60
   2  29   1   10.20   17.20
  -2  29  -1   -3.80   18.30
   2 -29   1  -10.80   26.10
  -2 -29  -1   17.90   16.30
   2  29   2  554.04   45.20
  -2  29  -2  523.85   46.40
  -2 -29  -2  532.85   45.00
   2 -29   2  500.75   52.79
  -2  29  -3  138.39   23.20
   2  29   3  126.79   21.80
   2 -29   3   84.59   32.70
  -2 -29  -3  168.18   21.90
  -2  29  -4  -18.40   21.60
   2  29   4   -7.20   19.60
  -2 -29  -4  -28.90   19.00
   2 -29   4  -20.70   32.20
   2  29   5  268.47   29.50
  -2  29  -5  193.68   28.90
   2 -29   5  217.68   38.80
  -2 -29  -5  234.98   26.90
  -2  29  -6   -1.20   24.00
   2  29   6  -11.30   23.40
   2 -29   6  -30.10   32.30
  -2  29  -7   34.10   26.20
   2 -29   7    7.80   36.30
   2  30  -7   17.10   27.10
  -2 -30   7  -50.19   33.60
   2 -30  -7  -17.10   28.10
   2  30  -6   66.49   24.60
   2 -30  -6   36.60   26.80
  -2 -30   6   35.10   33.60
  -2  30   5  428.76   36.10
   2  30  -5  292.77   35.70
   2 -30  -5  351.26   42.70
  -2 -30   5  355.76   44.40
  -2  30   4   99.59   19.60
   2  30  -4  135.89   23.10
  -2 -30   4   23.30   30.10
   2 -30  -4  105.49   25.30
  -2  30   3  238.08   26.90
   2  30  -3  173.48   26.40
  -2 -30   3  145.99   30.80
   2 -30  -3  245.28   32.00
   2  30  -2   34.30   19.80
  -2  30   2   54.89   18.30
   2 -30  -2   79.99   23.70
  -2 -30   2   -9.60   23.10
  -2  30   1   26.10   18.50
   2  30  -1    3.30   18.80
   2 -30  -1   33.10   23.10
  -2 -30   1   26.30   20.80
  -2  30   0  333.17   34.10
   2  30   0  337.87   34.00
   2 -30   0  273.97   35.70
  -2 -30   0  375.06   33.40
   2  30   1   16.40   18.10
  -2  30  -1   39.70   18.80
   2 -30   1  -16.30   26.70
  -2 -30  -1   45.80   17.50
  -2  30  -2    9.70   20.40
   2  30   2   26.90   19.50
   2 -30   2  -49.80   29.50
  -2 -30  -2   45.00   17.10
   2  30   3  623.54   52.09
  -2  30  -3  626.84   52.39
   2 -30   3  553.54   59.49
  -2 -30  -3  605.64   50.59
   2  30   4    1.60   20.50
  -2  30  -4  -18.60   22.30
  -2 -30  -4    0.10   22.20
   2 -30   4  -35.80   33.00
  -2  30  -5   -0.20   24.70
   2  30   5   -5.50   24.50
   2 -30   5  -13.30   37.70
   2  30   6  165.48   29.30
  -2  30  -6  123.69   28.80
   2 -30   6  102.99   40.10
   2  31  -7  176.68   30.70
  -2 -31   7  194.58   40.60
   2 -31  -7  185.28   32.50
   2  31  -6  260.17   32.20
   2 -31  -6  247.28   33.70
  -2 -31   6  238.48   43.60
  -2  31   5   43.30   19.80
   2  31  -5   39.80   23.90
  -2 -31   5  -32.00   34.20
   2 -31  -5   30.40   25.50
  -2  31   4   25.70   19.90
   2  31  -4   49.20   21.70
   2 -31  -4   64.19   25.00
  -2 -31   4  -33.30   30.20
   2  31  -3   56.49   22.00
  -2  31   3   68.69   19.50
   2 -31  -3   90.29   24.60
  -2  31   2  111.09   24.00
   2  31  -2  121.69   22.60
   2 -31  -2  144.49   26.40
  -2 -31   2   33.70   25.80
  -2  31   1   30.10   19.20
   2  31  -1   34.10   20.40
  -2 -31   1   22.10   19.80
   2 -31  -1   45.70   23.80
   2  31   0  130.99   21.60
  -2  31   0  128.99   22.60
  -2 -31   0  150.18   20.70
   2 -31   0   91.39   28.00
   2  31   1  189.58   25.60
  -2  31  -1  180.68   25.50
   2 -31   1  139.99   32.50
  -2 -31  -1  250.07   26.80
   2  31   2  496.55   41.40
  -2  31  -2  439.46   42.10
   2 -31   2  366.36   51.09
  -2 -31  -2  439.16   39.60
  -2  31  -3   22.30   22.10
   2  31   3   54.29   21.70
   2 -31   3    6.00   33.20
   2  31   4   -0.30   20.70
  -2  31  -4  -35.30   23.30
   2 -31   4  -50.99   36.30
  -2  31  -5   95.09   26.50
   2  31   5  161.78   26.00
   2 -31   5   29.80   36.10
  -2  31  -6    9.90   27.50
   2  31   6   69.89   27.30
   2 -31   6  -28.70   45.30
   2  32  -6  286.87   33.50
   2 -32  -6  234.18   34.40
  -2 -32   6  254.87   48.10
   2  32  -5  100.79   25.90
   2 -32  -5  112.19   27.40
  -2 -32   5   52.19   37.40
   2  32  -4  311.27   36.30
  -2  32   4  358.26   34.00
  -2 -32   4  181.58   39.70
   2 -32  -4  303.77   39.70
  -2  32   3  156.08   23.00
   2  32  -3  150.28   25.70
   2 -32  -3  170.28   28.00
  -2  32   2   44.70   20.20
   2  32  -2   61.99   22.30
  -2 -32   2    4.10   25.50
   2 -32  -2  117.99   25.20
  -2  32   1    8.00   20.90
   2  32  -1   -6.30   20.70
   2 -32  -1   33.30   25.10
  -2 -32   1    3.50   21.60
   2  32   0   49.80   21.90
  -2  32   0   26.30   21.00
  -2 -32   0  105.79   19.60
   2 -32   0   31.50   27.40
  -2  32  -1   35.40   20.70
   2  32   1   55.89   21.00
   2 -32   1  -48.10   28.40
  -2 -32  -1   83.59   21.10
   2  32   2  242.68   28.00
  -2  32  -2  247.98   28.30
   2 -32   2  166.48   36.50
   2  32   3  193.18   26.30
  -2  32  -3  165.18   26.50
   2 -32   3  136.49   37.90
  -2  32  -4   77.29   25.50
   2  32   4  111.69   25.40
   2 -32   4   -4.50   36.00
   2  32   5   25.40   23.70
  -2  32  -5  -19.70   25.40
   2 -32   5  -44.40   42.10
   2  33  -6   76.19   27.50
   2 -33  -6   36.40   28.00
  -2 -33   6  -32.10   45.20
   2  33  -5   64.89   26.40
  -2 -33   5   30.60   37.40
   2 -33  -5   91.59   27.10
  -2  33   4   59.29   20.60
   2  33  -4   49.00   24.80
  -2 -33   4  -96.89   34.40
   2 -33  -4   49.70   25.50
  -2  33   3    2.10   20.90
   2  33  -3   36.10   23.30
   2 -33  -3   64.89   25.80
   2  33  -2   63.29   23.00
  -2  33   2   50.29   21.20
   2 -33  -2  118.19   26.70
  -2 -33   2  -29.40   26.00
  -2  33   1   10.80   21.30
   2  33  -1   43.90   22.20
  -2 -33   1   34.60   20.40
   2 -33  -1   83.99   26.50
  -2  33   0   70.59   21.70
   2  33   0   77.19   23.80
   2 -33   0   63.89   27.90
   2  33   1  566.34   47.40
  -2  33  -1  570.44   49.30
   2 -33   1  432.56   55.19
  -2  33  -2   -1.90   22.40
   2  33   2   76.99   21.50
   2  33   3  120.69   23.90
  -2  33  -3  117.49   25.30
   2 -33   3  -12.60   34.60
   2  33   4   37.90   24.00
  -2  33  -4  -13.30   25.80
   2 -33   4  -94.99   41.70
  -2  33  -5   -6.80   26.90
   2  33   5   45.90   25.10
   2 -33   5  -57.89   45.50
   2  34  -5   27.00   26.50
  -2 -34   5 -119.49   39.20
   2 -34  -5   46.30   27.00
   2  34  -4  545.95   51.49
  -2  34   4  642.24   49.70
  -2 -34   4  400.16   60.79
   2 -34  -4  517.05   52.39
   2  34  -3   10.80   23.40
  -2  34   3   25.30   22.70
   2 -34  -3   59.99   26.10
  -2  34   2   26.30   22.00
   2  34  -2   31.50   23.60
   2 -34  -2   80.89   26.90
  -2  34   1  136.19   25.80
   2  34  -1  136.39   26.80
   2 -34  -1  225.88   30.40
  -2  34   0   26.40   23.20
   2  34   0   26.90   23.60
   2 -34   0   32.50   28.70
   2  34   1   42.90   24.00
  -2  34  -1   25.00   22.30
   2 -34   1  -44.30   30.90
   2  34   2  397.66   38.40
  -2  34  -2  269.67   32.10
   2 -34   2  188.18   41.80
   2  34   3   50.89   24.60
  -2  34  -3   31.40   25.90
   2 -34   3  -31.90   38.50
  -2  34  -4  123.69   27.50
   2 -34   4   60.39   45.40
  -2  35   4   58.79   24.60
   2  35  -4   56.69   27.50
   2 -35  -4   86.59   27.40
  -2  35   3  146.19   26.10
   2  35  -3  141.09   28.40
   2 -35  -3  143.59   29.30
  -2  35   2  343.97   38.50
   2  35  -2  259.47   34.60
   2 -35  -2  381.96   42.90
  -2  35   1   31.30   23.60
   2  35  -1    1.10   23.40
   2 -35  -1   73.69   28.40
  -2  35   0    4.90   22.70
   2  35   0   45.60   24.50
   2 -35   0   38.00   29.80
   2  35   1  283.17   33.00
  -2  35  -1  245.58   31.10
   2 -35   1  228.78   38.50
  -2  35  -2  151.28   27.30
   2  35   2  182.88   28.20
   2 -35   2   64.29   38.80
  -2  35  -3   13.90   25.50
   2  35   3   34.60   25.30
  -2  36   3  120.19   26.30
   2  36  -3   80.69   27.70
   2 -36  -3  144.69   29.30
  -2  36   2   92.89   26.00
   2  36  -2   84.39   26.40
   2 -36  -2  145.49   29.70
  -2  36   1   97.09   26.70
   2  36  -1   92.99   27.40
   2 -36  -1  191.58   30.80
   2  36   0  114.59   27.50
  -2  36   0   94.39   25.90
   2 -36   0  105.39   31.50
  -2  36  -1  147.79   28.20
   2  36   1  152.08   27.50
   2 -36   1   68.89   34.20
   2  36   2   77.79   26.90
  -2  36  -2   52.99   25.90
   2 -36   2  -82.79   36.30
   3   0 -13   10.20   29.10
   3   0 -12  170.88   30.50
   3   0 -11  -18.90   12.70
   3   0 -11    2.40   22.30
   3   0 -10 2636.04  189.28
   3   0 -10 2562.14  191.58
   3   0  -9   19.50    9.20
   3   0  -9   34.50   16.90
   3   0  -8    0.90   17.50
   3   0  -8    6.00    7.80
   3   0  -7   -7.20   12.30
   3   0  -7   -4.60    6.80
   3   0  -6  588.34   43.00
   3   0  -6  568.24   45.20
   3   0  -5   -4.10    9.80
   3   0  -4 3206.28  232.88
   3   0  -3   -3.70    7.20
   3   0  -2 1079.49   82.19
   3   0  -2 1157.08   82.29
  -3   0   2 1120.79   82.39
  -3   0   2 1086.89   82.19
   3   0  -1   -6.30    7.00
   3   0  -1   -2.10    7.00
  -3   0   1   -9.90    7.10
  -3   0   1   -8.70    6.90
  -3   0   0   66.29   11.00
   3   0   0   55.29   10.90
  -3   0  -1  -11.10    4.60
  -3   0  -2  275.17   21.70
  -3   0  -3   -7.50    6.30
  -3   0  -3    8.90    7.40
  -3   0  -4 7731.33  539.95
  -3   0  -4 7173.48  540.15
  -3   0  -5    3.40    9.70
  -3   0  -5    3.70    8.10
  -3   0  -6  893.01   65.09
  -3   0  -6  861.61   66.09
  -3   0  -7   24.00   13.00
  -3   0  -7   -6.70    9.90
  -3   0  -8  123.09   14.30
  -3   0  -8  108.09   18.20
  -3   0  -9   -3.30   18.30
  -3   0  -9  -14.30   12.70
  -3   0 -10  207.08   23.70
  -3   0 -10  186.88   26.60
  -3   0 -11    0.40   23.00
  -3   0 -11    9.20   15.90
   3   1 -13    3.30   28.80
   3  -1 -13   22.70   29.40
   3   1 -12   -9.10   25.70
   3  -1 -12   -9.10   25.10
   3   1 -11   31.90   22.90
   3   1 -11   19.50   12.80
   3  -1 -11   23.10   24.60
   3   1 -10  174.68   22.30
   3   1 -10  277.17   30.60
   3  -1 -10  275.27   30.50
   3  -1 -10  188.28   21.10
   3   1  -9 1021.80   78.19
   3   1  -9 1034.50   75.19
   3  -1  -9  955.30   78.79
   3  -1  -9 1049.40   74.99
   3   1  -8  -10.50   17.30
   3   1  -8   -1.10    7.90
   3  -1  -8    2.10    7.50
   3  -1  -8    0.30   17.70
   3   1  -7  334.37   25.70
   3   1  -7  305.37   29.50
   3  -1  -7  327.27   25.20
   3  -1  -7  323.37   29.50
   3   1  -6   12.70   10.80
   3   1  -6    3.80    6.30
   3  -1  -6   14.70   11.50
   3   1  -5   22.80    6.20
   3   1  -5   30.10    9.90
   3  -1  -5   31.10   10.20
   3   1  -4  521.85   40.10
   3  -1  -4  524.55   39.90
   3   1  -3 1825.42  132.39
   3  -1  -3 1807.52  132.39
   3  -1  -2   -7.30    6.60
   3   1  -1 3981.10  292.77
  -3   1   1 4070.19  292.87
  -3   1   1 4378.16  293.07
   3   1  -1 3583.94  292.67
  -3  -1   1 4014.00  292.77
   3  -1  -1 4185.68  292.97
   3  -1  -1 4171.78  292.97
  -3  -1   1 3873.31  292.77
   3   1   0 1777.72  123.79
  -3   1   0 1752.32  124.09
   3   1   0 1583.84  124.09
   3  -1   0 1718.63  124.79
  -3  -1   0 1552.34  123.89
   3  -1   0 1798.12  124.09
  -3   1  -1  725.83   53.49
  -3  -1  -1  725.03   53.39
  -3   1  -2   68.59    8.20
  -3  -1  -2   86.09    9.80
   3  -1   2   89.19    9.90
  -3   1  -3 1511.55  109.09
  -3  -1  -3 1450.15  109.29
  -3  -1  -3 1527.55  109.09
  -3   1  -4  179.38   17.20
  -3   1  -4  190.88   19.20
  -3  -1  -4  195.48   18.90
  -3  -1  -4  196.58   17.00
  -3   1  -5  871.41   67.49
  -3   1  -5  991.40   66.89
  -3  -1  -5  908.41   66.59
  -3  -1  -5  840.12   67.19
  -3   1  -6   76.49   11.10
  -3   1  -6   85.59   13.70
  -3  -1  -6   76.39   10.90
  -3  -1  -6   84.09   13.40
  -3   1  -7  365.86   29.40
  -3   1  -7  336.27   31.40
  -3  -1  -7  357.06   29.10
  -3  -1  -7  343.77   32.50
  -3   1  -8   44.80   15.70
  -3   1  -8   40.90   11.80
  -3  -1  -8   31.70   11.30
  -3  -1  -8   49.70   15.50
  -3   1  -9   25.90   17.60
  -3   1  -9   10.20   12.70
  -3  -1  -9   17.10   17.20
  -3   1 -10    7.30   20.50
  -3   1 -10   -2.10   13.90
  -3  -1 -10    6.60   14.10
  -3  -1 -10   29.30   21.30
  -3   1 -11   68.69   23.80
  -3   1 -11   58.39   19.80
  -3  -1 -11   68.89   24.60
  -3  -1 -11   59.29   22.00
   3   2 -13    8.60   30.20
   3  -2 -13   -4.90   31.00
   3   2 -12   86.79   26.90
   3  -2 -12   76.29   30.40
   3   2 -11  571.34   44.40
   3   2 -11  524.75   51.99
   3  -2 -11  568.64   51.39
   3   2 -10 1009.10   74.69
   3   2 -10 1031.30   78.49
   3  -2 -10 1015.00   74.19
   3  -2 -10  944.51   79.29
   3   2  -9  459.65   41.40
   3   2  -9  458.35   36.60
   3  -2  -9  455.25   41.20
   3  -2  -9  473.45   35.50
   3   2  -8   35.30    8.80
   3   2  -8   27.60   18.00
   3  -2  -8   14.20   23.50
   3  -2  -8   22.40    7.40
   3   2  -7  152.08   20.30
   3   2  -7  167.48   15.70
   3  -2  -7  149.09   18.00
   3  -2  -7  159.58   14.00
   3   2  -6  149.59   14.70
   3   2  -6  152.08   19.70
   3  -2  -6  176.28   19.30
   3   2  -5 2484.75  174.58
   3   2  -5 2385.76  175.18
   3  -2  -5 2339.27  175.28
   3   2  -4 1169.58   84.49
   3   2  -4 1144.49   83.89
   3  -2  -4 1131.19   84.49
   3   2  -3  195.38   16.90
   3  -2  -3  195.28   17.50
   3  -2  -2  271.07   21.90
   3   2  -1 9173.98  667.43
  -3   2   1 9999.00  667.63
  -3  -2   1 8983.90  667.43
  -3  -2   1 8654.53  667.33
   3   2   0  152.18   15.30
  -3   2   0  163.68   16.30
   3   2   0  129.09   14.60
  -3  -2   0  139.39   15.60
   3  -2   0  171.88   16.60
   3  -2   0  165.18   16.70
  -3   2  -1   70.49    7.70
  -3  -2  -1   70.29    7.60
   3  -2   1   84.09   10.60
  -3   2  -2    6.50    5.80
   3  -2   2    2.40    7.50
  -3  -2  -2   10.00    5.90
  -3  -2  -2   12.70    5.80
  -3   2  -3 2409.36  173.78
  -3  -2  -3 2436.96  173.78
  -3  -2  -3 2327.17  173.88
  -3   2  -4 1914.01  135.49
  -3   2  -4 1849.11  135.89
  -3  -2  -4 1910.91  135.39
  -3  -2  -4 1770.12  135.69
  -3   2  -5  927.71   70.99
  -3   2  -5  947.81   69.99
  -3  -2  -5  958.20   70.79
  -3  -2  -5  962.40   70.09
  -3   2  -6  868.41   66.79
  -3   2  -6  922.81   65.89
  -3  -2  -6  895.81   65.69
  -3  -2  -6  851.71   66.89
  -3   2  -7  181.18   22.60
  -3   2  -7  202.58   20.00
  -3  -2  -7  173.08   18.50
  -3  -2  -7  206.88   22.80
  -3   2  -8  146.59   16.00
  -3   2  -8  128.39   19.60
  -3  -2  -8  152.68   19.20
  -3  -2  -8  144.59   15.40
  -3   2  -9  390.56   33.50
  -3   2  -9  380.36   37.80
  -3  -2  -9  356.76   36.80
  -3  -2  -9  403.26   37.30
  -3   2 -10   50.89   20.80
  -3   2 -10   47.50   15.20
  -3  -2 -10   48.10   14.00
  -3  -2 -10   29.20   20.60
  -3   2 -11   96.59   19.00
  -3   2 -11   94.39   26.10
  -3  -2 -11  122.79   25.80
  -3  -2 -11  102.79   19.00
   3   3 -13   82.19   33.10
   3  -3 -13  107.09   33.40
   3   3 -12  -18.40   25.50
   3  -3 -12   -7.80   25.50
   3   3 -11   59.89   14.00
   3   3 -11   70.89   24.10
   3  -3 -11   74.39   23.30
   3   3 -10  144.29   15.90
   3   3 -10  141.59   23.90
   3  -3 -10  132.39   13.70
   3  -3 -10  149.99   23.30
   3   3  -9  144.09   20.40
   3   3  -9  138.69   14.40
   3  -3  -9  140.39   20.40
   3  -3  -9  126.79   14.50
   3   3  -8  116.59   21.40
   3   3  -8  131.69   12.70
   3  -3  -8  101.39   12.10
   3   3  -7  586.44   45.70
   3   3  -7  588.54   43.40
   3  -3  -7  550.44   46.00
   3   3  -6   14.60    7.40
   3   3  -6   25.30   11.30
   3  -3  -6   15.90   11.90
   3   3  -5 2243.58  161.58
   3   3  -5 2236.78  162.18
   3  -3  -5 2186.18  162.28
   3   3  -4  220.28   19.40
   3   3  -4  214.48   18.50
   3  -3  -4  217.38   20.10
   3   3  -3  300.17   24.40
   3   3  -3  307.87   23.80
   3  -3  -3  311.07   24.80
   3  -3  -2  830.42   61.29
   3  -3  -1 3198.98  232.88
   3   3   0 1180.58   82.49
   3  -3   0 1080.19   83.79
  -3   3  -1  537.15   39.50
  -3  -3  -1  546.05   39.50
   3  -3   1  514.55   40.30
  -3   3  -2   83.19    8.70
  -3  -3  -2   81.79    8.60
   3  -3   2   70.39   10.40
  -3   3  -3 1446.16  105.29
   3  -3   3 1459.65  105.89
  -3  -3  -3 1465.15  105.19
  -3  -3  -3 1398.96  105.39
  -3   3  -4  485.15   37.30
  -3  -3  -4  499.65   36.80
  -3  -3  -4  475.95   37.70
  -3   3  -5    7.20   10.30
  -3   3  -5   11.80    7.90
  -3  -3  -5    6.70    7.80
  -3  -3  -5   19.70   10.30
  -3   3  -6  214.58   23.10
  -3   3  -6  231.28   20.90
  -3  -3  -6  218.68   20.20
  -3  -3  -6  221.68   23.30
  -3   3  -7  792.42   59.99
  -3  -3  -7  805.92   61.39
  -3  -3  -7  791.22   59.59
  -3   3  -8  219.48   25.80
  -3   3  -8  179.28   20.00
  -3  -3  -8  199.58   25.80
  -3  -3  -8  171.98   19.90
  -3   3  -9  263.97   33.80
  -3   3  -9  273.67   26.90
  -3  -3  -9  252.67   32.40
  -3  -3  -9  273.27   27.10
  -3   3 -10    8.30   20.60
  -3   3 -10    1.10   15.20
  -3  -3 -10   14.00   20.40
  -3  -3 -10    7.50   17.40
  -3   3 -11   50.69   17.40
  -3   3 -11   36.40   25.80
  -3  -3 -11   48.20   15.80
  -3  -3 -11   38.20   23.40
   3   4 -12  -12.20   27.00
   3  -4 -12  -19.60   26.90
   3   4 -11  370.46   40.50
   3   4 -11  350.26   31.40
   3  -4 -11  307.87   43.40
   3   4 -10    1.60   12.00
   3   4 -10  -12.70   19.60
   3  -4 -10   10.50   19.40
   3   4  -9  339.87   28.50
   3   4  -9  328.77   33.90
   3  -4  -9  332.87   26.30
   3  -4  -9  356.36   35.70
   3   4  -8   76.99   11.20
   3   4  -8   52.59   25.50
   3   4  -7  171.58   16.20
   3   4  -7  159.58   20.80
   3  -4  -7  158.78   21.50
   3   4  -6 4988.00  358.26
   3   4  -6 4956.50  358.86
   3  -4  -6 4882.91  358.96
   3   4  -5  674.23   51.59
   3   4  -5  699.53   50.69
   3  -4  -5  670.43   51.89
   3   4  -4  149.49   16.30
   3   4  -4  192.08   17.40
   3  -4  -4  182.48   17.70
   3   4  -3 2123.09  155.88
   3   4  -3 2129.89  155.98
   3  -4  -3 2180.18  156.28
   3   4  -2  132.69   11.30
   3  -4  -2  114.49   12.30
   3   4  -1 1602.64  120.09
   3  -4  -1 1703.63  120.69
  -3   4   0 4794.82  339.27
   3   4   0 4860.41  339.27
   3  -4   0 4389.06  339.57
  -3   4  -1  296.97   22.60
   3  -4   1  290.07   24.40
  -3   4  -2  559.84   42.30
   3  -4   2  571.24   43.30
  -3  -4  -2  577.64   42.30
  -3   4  -3  887.31   66.19
  -3  -4  -3  902.71   66.19
  -3  -4  -3  874.91   66.29
   3  -4   3  937.31   67.29
  -3   4  -4  246.08   21.20
  -3  -4  -4  248.58   22.00
  -3  -4  -4  256.47   20.70
  -3   4  -5 1120.39   81.89
  -3  -4  -5 1111.59   81.69
  -3  -4  -5 1109.89   82.49
  -3   4  -6  121.39   15.60
  -3   4  -6  129.49   13.50
  -3  -4  -6  130.79   12.80
  -3  -4  -6  122.79   15.40
  -3   4  -7   90.79   12.30
  -3   4  -7   82.49   16.70
  -3  -4  -7   84.59   15.10
  -3  -4  -7   78.09   11.30
  -3   4  -8 1325.77   99.79
  -3  -4  -8 1317.97   99.09
  -3  -4  -8 1330.07   97.59
  -3   4  -9   95.69   19.40
  -3   4  -9  100.39   15.40
  -3  -4  -9   81.89   13.30
  -3  -4  -9   68.99   19.90
  -3   4 -10  106.99   17.50
  -3   4 -10  103.79   23.00
  -3  -4 -10   94.19   22.30
  -3  -4 -10  113.09   19.50
  -3   4 -11  149.79   22.40
  -3   4 -11  154.68   28.30
  -3  -4 -11  182.48   22.40
  -3  -4 -11  198.28   27.80
   3   5 -12    6.20   26.40
   3  -5 -12   -7.60   26.90
   3   5 -11  279.97   36.00
   3   5 -11  307.67   29.70
   3  -5 -11  318.47   38.60
   3   5 -10   16.80   12.20
   3   5 -10   14.20   19.50
   3  -5 -10   35.60   20.90
   3   5  -9   55.29   11.80
   3   5  -9   57.79   17.80
   3  -5  -9   40.80   17.90
   3  -5  -9   44.60    9.50
   3   5  -8  177.68   18.10
   3  -5  -8  173.38   29.50
   3   5  -7  114.59   15.70
   3   5  -7  113.79   12.20
   3  -5  -7  103.99   16.50
   3   5  -6  129.49   14.20
   3  -5  -6   86.99   14.70
   3   5  -5 3956.30  285.77
   3   5  -5 3922.11  285.37
   3  -5  -5 3923.91  285.87
   3   5  -4  812.12   61.79
   3   5  -4  879.91   62.09
   3  -5  -4  820.52   62.49
   3   5  -3  192.28   17.80
   3   5  -3  248.78   18.20
   3  -5  -3  185.78   19.60
   3   5  -2 1289.17   96.99
   3  -5  -2 1375.06   97.59
   3   5  -1  226.68   18.10
   3  -5  -1  233.38   21.10
   3   5   0  857.61   61.99
  -3   5   0  845.62   61.79
   3  -5   0  832.72   63.19
  -3   5  -1   25.80    5.50
   3   5   1   34.10    5.80
   3  -5   1   33.80    8.60
  -3   5  -2    3.50    5.80
   3  -5   2    3.20    8.60
  -3   5  -3 2718.53  202.78
  -3  -5  -3 2871.91  202.78
  -3  -5  -3 2755.42  202.88
   3  -5   3 2829.72  203.38
  -3   5  -4   42.90    8.50
  -3  -5  -4   45.40    9.20
  -3  -5  -4   44.00    8.10
  -3   5  -5  120.29   14.50
  -3  -5  -5  123.19   16.50
  -3  -5  -5  123.19   12.30
  -3   5  -6  447.16   34.60
  -3  -5  -6  442.16   36.20
  -3  -5  -6  427.86   34.20
  -3   5  -7  402.96   33.90
  -3   5  -7  412.26   37.10
  -3  -5  -7  411.16   35.40
  -3  -5  -7  427.96   33.30
  -3   5  -8  109.19   18.20
  -3   5  -8   96.49   14.40
  -3  -5  -8   93.39   12.80
  -3  -5  -8  112.29   18.20
  -3   5  -9  490.45   46.60
  -3   5  -9  510.55   41.10
  -3  -5  -9  534.75   40.60
  -3  -5  -9  501.35   45.40
  -3   5 -10  133.69   19.00
  -3   5 -10  154.18   24.40
  -3  -5 -10  125.59   23.40
  -3  -5 -10  133.49   19.40
  -3   5 -11   86.79   19.50
  -3  -5 -11   80.39   20.70
  -3  -5 -11   89.79   24.60
   3   6 -12  122.09   30.00
   3   6 -12  139.59   19.60
   3  -6 -12  138.79   29.10
   3   6 -11   20.00   23.10
   3   6 -11   30.00   14.20
   3  -6 -11   24.20   23.80
   3   6 -10    1.80   12.00
   3   6 -10   -7.40   19.10
   3  -6 -10    6.00   20.80
   3   6  -9    4.10   17.40
   3   6  -9    0.80   11.00
   3  -6  -9    9.10   18.40
   3   6  -8  824.62   59.99
   3  -6  -8  770.22   63.59
   3   6  -7  190.58   19.00
   3   6  -7  198.68   23.60
   3  -6  -7  199.58   23.40
   3   6  -6 3107.39  227.78
   3   6  -6 3230.68  227.18
   3  -6  -6 3043.30  227.88
   3   6  -5  512.75   39.60
   3   6  -5  531.15   40.50
   3  -6  -5  506.95   40.80
   3   6  -4  162.28   16.20
   3   6  -4  180.58   18.90
   3  -6  -4  156.78   17.80
   3   6  -3 2312.67  166.18
   3   6  -3 2241.68  166.18
   3  -6  -3 2305.47  166.58
   3   6  -2  363.46   27.10
   3  -6  -2  338.07   28.50
   3   6  -1  783.62   59.39
   3  -6  -1  845.22   60.89
  -3   6   0 3895.31  279.17
   3   6   0 3931.51  279.27
   3  -6   0 3726.93  279.77
  -3   6  -1  116.19   11.50
   3   6   1  121.89   11.80
   3  -6   1  116.19   14.70
  -3   6  -2 2558.84  190.08
   3   6   2 2609.54  189.98
   3  -6   2 2686.73  190.68
  -3   6  -3  232.48   20.40
   3  -6   3  254.37   22.80
  -3  -6  -3  245.88   20.60
  -3   6  -4   17.40    8.10
  -3  -6  -4   20.70    7.50
   3  -6   4   24.90   11.50
  -3  -6  -4   23.20    8.60
  -3   6  -5   64.49    9.90
  -3  -6  -5   66.39   11.10
  -3  -6  -5   53.29    9.20
  -3   6  -6  311.77   26.50
  -3  -6  -6  311.77   27.90
  -3  -6  -6  295.17   25.40
  -3   6  -7   52.89   11.20
  -3  -6  -7   65.19   14.80
  -3  -6  -7   52.49   10.10
  -3   6  -8 1048.90   80.79
  -3  -6  -8 1123.59   82.79
  -3  -6  -8 1090.89   80.59
  -3   6  -9  405.76   35.10
  -3  -6  -9  399.36   34.90
  -3  -6  -9  435.06   39.00
  -3   6 -10  240.38   27.60
  -3  -6 -10  242.18   32.60
  -3  -6 -10  220.08   23.40
  -3   6 -11   18.70   17.80
  -3  -6 -11   21.20   23.30
  -3  -6 -11    6.40   18.70
   3   7 -12  127.39   20.10
   3   7 -12  138.49   30.40
   3  -7 -12  166.28   29.80
   3   7 -11  387.26   45.60
   3  -7 -11  386.66   42.80
   3   7 -10   70.39   13.90
   3   7 -10   77.99   21.80
   3  -7 -10   61.49   21.40
   3   7  -9  173.08   19.90
   3   7  -9  151.88   22.20
   3  -7  -9  170.58   22.90
   3   7  -8   37.20   11.40
   3   7  -8   59.69   23.90
   3  -7  -8   28.40   16.70
   3   7  -7   62.99   11.30
   3   7  -7   64.59   14.00
   3  -7  -7   66.19   16.10
   3   7  -6  687.13   51.09
   3   7  -6  673.73   52.29
   3  -7  -6  669.53   52.69
   3   7  -5  788.62   58.39
   3   7  -5  752.12   58.19
   3  -7  -5  794.02   59.09
   3   7  -4  876.31   63.09
   3   7  -4  813.32   62.99
   3  -7  -4  859.71   63.69
   3   7  -3  984.90   72.99
   3   7  -3  993.00   72.79
   3  -7  -3  999.70   73.69
   3   7  -2  259.77   19.50
   3  -7  -2  212.28   21.60
   3   7  -1 1235.28   93.49
   3  -7  -1 1334.07   94.49
  -3   7   0   15.90    5.30
   3   7   0   23.20    5.70
   3  -7   0   34.70    9.60
   3   7   1  390.56   29.60
  -3   7  -1  388.16   29.60
   3  -7   1  394.16   31.50
   3   7   2   15.40    5.90
  -3   7  -2   16.20    6.70
   3  -7   2   31.10    9.70
   3   7   3 3037.60  222.98
  -3   7  -3 3003.90  223.18
  -3  -7  -3 3109.79  223.08
   3  -7   3 3145.39  223.78
  -3   7  -4  449.56   34.10
  -3  -7  -4  436.96   34.40
   3  -7   4  437.16   36.10
  -3   7  -5  255.57   20.90
  -3  -7  -5  218.28   20.40
  -3  -7  -5  229.88   22.20
   3  -7   5  236.28   24.90
  -3   7  -6  213.88   20.70
  -3  -7  -6  236.38   23.30
  -3  -7  -6  217.88   20.20
  -3   7  -7   37.80   11.20
  -3  -7  -7   28.70    9.60
  -3  -7  -7   41.50   14.00
  -3   7  -8    7.60   11.60
  -3  -7  -8    7.90   15.50
  -3  -7  -8   12.30   10.20
  -3   7  -9  130.39   16.90
  -3  -7  -9  131.29   21.40
  -3  -7  -9  126.59   15.10
  -3   7 -10  287.47   30.30
  -3  -7 -10  293.27   36.40
  -3  -7 -10  267.07   29.20
  -3   7 -11  262.77   26.30
  -3  -7 -11  212.38   30.80
   3   8 -12   36.70   29.20
   3   8 -12   64.59   18.40
   3  -8 -12   69.49   28.70
   3   8 -11   84.09   25.90
   3   8 -11  120.79   16.80
   3  -8 -11  100.59   25.70
   3   8 -10  515.65   41.00
   3   8 -10  489.65   49.90
   3  -8 -10  492.25   48.60
   3   8  -9  450.95   37.60
   3   8  -9  440.16   42.50
   3  -8  -9  473.55   41.90
   3   8  -8  473.15   42.80
   3   8  -8  509.65   39.20
   3  -8  -8  498.85   42.80
   3   8  -7 1468.05  104.59
   3   8  -7 1400.66  105.59
   3  -8  -7 1398.46  105.89
   3   8  -6  102.29   12.40
   3   8  -6   92.19   13.70
   3  -8  -6   87.09   15.70
   3   8  -5  610.94   45.70
   3   8  -5  591.24   45.10
   3  -8  -5  572.04   46.20
   3   8  -4   57.29   10.60
   3   8  -4   66.99    9.90
   3  -8  -4   59.99   12.10
   3   8  -3   74.49    8.90
   3   8  -3   91.69   10.40
   3  -8  -3   56.89   11.90
   3   8  -2  893.81   67.19
   3  -8  -2  933.91   68.09
  -3   8   1  836.02   62.09
   3   8  -1  823.72   62.39
   3  -8  -1  895.61   63.79
   3   8   0  856.71   61.99
  -3   8   0  841.42   61.89
   3  -8   0  827.92   63.19
   3   8   1 5508.95  391.96
  -3   8  -1 5407.06  391.96
   3  -8   1 5312.57  392.46
  -3   8  -2  828.72   63.19
   3   8   2  879.31   63.09
   3  -8   2  868.41   64.29
  -3   8  -3  475.45   37.70
   3   8   3  484.75   37.50
   3  -8   3  512.15   39.50
  -3  -8  -3  512.85   37.60
  -3   8  -4  781.42   57.69
   3   8   4  753.32   57.19
   3  -8   4  778.92   59.09
  -3  -8  -4  788.92   57.89
  -3   8  -5  240.48   20.70
  -3  -8  -5  221.38   21.90
   3  -8   5  223.58   24.40
  -3   8  -6  149.09   17.20
  -3  -8  -6  149.99   16.90
  -3  -8  -7  666.83   52.79
  -3   8  -8   61.79   13.40
  -3  -8  -8   65.79   17.40
  -3   8  -9 1060.49   82.69
  -3  -8  -9 1133.19   84.99
  -3   8 -10   23.60   16.40
  -3  -8 -10   67.69   21.70
  -3   8 -11   86.79   20.40
  -3  -8 -11   88.59   25.70
   3   9 -12  441.06   49.80
   3   9 -12  389.76   39.50
   3  -9 -12  403.76   48.00
   3   9 -11   94.99   18.00
   3   9 -11  104.29   25.60
   3  -9 -11   81.59   26.50
   3   9 -10   31.30   21.60
   3   9 -10   44.80   21.40
   3  -9 -10   18.10   21.70
   3   9  -9  307.77   28.60
   3   9  -9  316.57   33.30
   3  -9  -9  307.27   35.90
   3   9  -8    9.80   12.00
   3   9  -8   12.50   15.90
   3  -9  -8   15.70   16.80
   3   9  -7  113.49   14.00
   3   9  -7  102.39   15.70
   3  -9  -7   94.39   17.20
   3   9  -6  708.83   54.59
   3   9  -6  718.23   53.89
   3  -9  -6  704.83   55.19
   3   9  -5   73.09   11.80
   3   9  -5   68.39   11.40
   3  -9  -5   65.39   14.00
   3   9  -4  377.16   33.50
   3   9  -4  432.86   32.70
   3  -9  -4  426.46   34.20
   3   9  -3  339.07   26.30
   3   9  -3  377.36   27.60
   3  -9  -3  291.57   28.40
   3   9  -2   75.69    9.20
   3  -9  -2   59.89   12.50
  -3   9   1 1588.54  113.69
   3   9  -1 1489.05  113.89
   3  -9  -1 1616.24  115.09
  -3   9   0  323.97   25.20
   3   9   0  325.77   25.50
   3  -9   0  339.77   28.40
   3   9   1   33.70    6.50
  -3   9  -1   23.90    6.60
   3  -9   1   39.60   10.60
   3   9   2  534.15   38.80
  -3   9  -2  515.45   39.10
   3  -9   2  503.25   40.70
   3   9   3  389.46   29.40
  -3   9  -3  378.16   30.20
  -3  -9  -3  387.46   30.00
   3  -9   3  381.06   32.40
  -3   9  -4  119.89   14.30
   3   9   4  109.09   11.30
  -3  -9  -4  123.09   14.90
   3  -9   4  125.49   15.60
   3   9   5  289.57   23.60
  -3   9  -5  283.47   24.70
   3  -9   5  294.47   28.20
  -3  -9  -5  290.57   25.60
  -3   9  -6  138.29   14.90
  -3  -9  -6  135.79   16.30
   3  -9   6  136.79   19.00
  -3   9  -7  150.28   18.00
  -3  -9  -7  194.08   19.90
  -3   9  -8   43.00   13.90
  -3  -9  -8   53.29   16.80
  -3   9  -9   25.80   15.00
  -3  -9  -9   23.40   19.50
  -3   9 -10  205.78   23.90
  -3  -9 -10  267.07   29.10
  -3   9 -11  141.09   21.90
  -3  -9 -11  133.89   27.70
   3  10 -12  157.48   21.30
   3  10 -12  164.08   34.50
   3 -10 -12  154.58   31.70
   3  10 -11   11.00   16.10
   3  10 -11   50.99   26.10
   3 -10 -11    2.70   24.90
   3  10 -10  942.11   73.39
   3  10 -10  896.61   69.99
   3 -10 -10  920.31   74.19
   3  10  -9  145.59   17.50
   3  10  -9  151.78   21.30
   3 -10  -9  131.49   23.50
   3  10  -8  157.18   20.20
   3  10  -8  158.48   17.50
   3 -10  -8  163.88   22.00
   3  10  -7 1032.70   76.79
   3  10  -7 1041.80   76.19
   3 -10  -7  982.60   77.49
   3  10  -6   88.89   13.80
   3  10  -6   87.99   13.00
   3 -10  -6   81.69   15.60
   3  10  -5   -8.40   10.60
   3  10  -5   39.80   10.00
   3 -10  -5   16.20   12.90
   3  10  -4 2043.90  148.89
   3  10  -4 2013.40  148.99
   3 -10  -4 2067.69  149.39
   3  10  -3   56.79    8.60
   3  10  -3   82.19   11.00
   3 -10  -3   13.60   12.40
   3  10  -2 1829.82  135.29
   3 -10  -2 1887.11  136.09
   3  10  -1   16.80    6.70
  -3  10   1    3.00    5.60
   3 -10  -1   33.20   12.20
   3  10   0  359.16   28.40
  -3  10   0  362.06   28.20
   3 -10   0  393.46   31.30
  -3  10  -1 2891.01  206.28
   3  10   1 2884.91  206.28
   3 -10   1 2748.32  206.98
  -3  10  -2  241.88   21.40
   3  10   2  263.07   20.80
   3 -10   2  268.77   24.40
  -3  10  -3    4.90    8.20
   3  10   3   17.90    6.80
  -3 -10  -3   10.30    7.50
   3 -10   3   11.00   11.60
  -3  10  -4 1378.86  102.19
   3  10   4 1378.76  101.79
  -3 -10  -4 1420.96  102.19
   3 -10   4 1399.66  103.29
   3  10   5   -3.90    7.60
  -3  10  -5   -7.80    9.50
  -3 -10  -5   -5.60   10.30
   3 -10   5   49.90   13.60
   3  10   6  695.43   53.29
  -3  10  -6  714.43   54.39
  -3 -10  -6  725.43   55.09
  -3  10  -7  448.26   38.70
   3  10   7  461.55   36.80
  -3 -10  -7  489.05   40.20
   3 -10   7  499.15   42.30
   3  10   8   15.80   10.30
  -3  10  -8  -16.40   12.70
   3 -10   8   17.50   19.50
  -3 -10  -8   -4.40   15.90
   3  10   9  528.85   39.60
  -3  10  -9  454.15   40.60
  -3 -10  -9  465.75   45.60
  -3  10 -10  148.79   20.90
  -3 -10 -10  147.59   25.30
  -3  10 -11   43.10   19.10
   3 -10  11   48.10   29.00
  -3 -10 -11   64.19   25.80
   3  11 -12  221.28   25.20
   3  11 -12  214.78   35.10
   3 -11 -12  233.58   35.10
   3  11 -11   29.00   17.10
   3  11 -11   32.40   31.80
   3 -11 -11   31.40   26.20
   3  11 -10   46.90   16.30
   3  11 -10   81.69   20.90
   3 -11 -10   38.10   22.20
   3  11  -9   73.99   18.80
   3 -11  -9   70.99   20.80
   3  11  -8  324.37   30.40
   3  11  -8  299.87   28.50
   3 -11  -8  271.57   33.70
   3  11  -7  786.42   59.29
   3  11  -7  775.82   60.29
   3 -11  -7  763.32   61.39
   3  11  -6  324.67   29.10
   3  11  -6  324.47   28.00
   3 -11  -6  321.17   30.50
   3  11  -5  378.16   30.60
   3  11  -5  345.27   31.10
   3 -11  -5  373.86   32.30
   3  11  -4  623.84   46.90
   3  11  -4  612.24   47.50
   3 -11  -4  621.94   48.40
   3  11  -3  238.68   21.30
   3  11  -3  243.48   19.40
   3 -11  -3  162.58   22.60
  -3  11   2   65.29    8.20
   3  11  -2  124.89   13.20
  -3  11   1 1513.05  107.59
   3  11  -1 1423.66  107.89
   3 -11  -1 1494.95  109.09
   3  11   0 1759.72  132.39
  -3  11   0 1877.01  132.39
   3 -11   0 1819.62  133.59
   3  11   1   41.80    7.40
  -3  11  -1   21.60    7.70
   3 -11   1   63.69   12.60
   3  11   2  734.43   52.99
  -3  11  -2  699.73   53.19
   3 -11   2  707.73   54.79
  -3  11  -3    8.90    8.50
   3  11   3   14.40    6.70
   3 -11   3   19.70   11.60
  -3 -11  -3    9.90    7.70
   3  11   4    2.30    7.10
  -3  11  -4    1.70    9.20
  -3 -11  -4   19.10    9.10
   3 -11   4    1.20   12.80
   3  11   5   19.80    7.70
  -3  11  -5   10.50   10.30
   3 -11   5    3.90   13.90
  -3 -11  -5   12.40   10.40
   3  11   6  296.27   25.10
  -3  11  -6  293.77   26.70
  -3 -11  -6  295.67   27.80
   3 -11   6  305.87   30.70
   3  11   7  756.72   56.89
  -3  11  -7  772.22   57.89
  -3 -11  -7  777.42   59.29
   3 -11   7  728.73   60.89
   3  11   8   15.30   10.30
  -3  11  -8   -0.50   13.10
   3 -11   8   -3.40   19.40
  -3 -11  -8    3.40   16.80
   3  11   9   52.69   13.90
  -3  11  -9   25.10   16.30
   3 -11   9   24.70   21.70
  -3 -11  -9   13.50   20.00
  -3  11 -10  185.98   22.70
   3 -11  10  208.48   30.70
  -3 -11 -10  211.08   27.90
  -3  11 -11   17.00   19.00
   3 -11  11   -1.90   28.20
  -3 -11 -11   -5.90   25.00
   3  12 -12  225.18   39.00
   3  12 -12  249.78   27.20
   3 -12 -12  281.57   37.20
   3  12 -11  338.47   40.80
   3  12 -11  306.97   32.80
   3 -12 -11  294.77   36.60
   3  12 -10  237.08   29.00
   3  12 -10  292.97   34.50
   3 -12 -10  270.47   36.40
   3  12  -9  429.46   40.50
   3  12  -9  435.76   38.10
   3 -12  -9  453.85   42.50
   3  12  -8  676.53   52.19
   3  12  -8  677.53   54.59
   3 -12  -8  636.24   55.89
   3  12  -7  118.59   15.20
   3  12  -7   95.49   16.30
   3 -12  -7  128.09   19.50
   3  12  -6    6.80   11.90
   3  12  -6    2.30   11.80
   3 -12  -6   -2.80   14.50
   3  12  -5  186.48   23.00
   3  12  -5  228.88   21.90
   3 -12  -5  244.58   25.20
   3  12  -4 3090.69  225.08
   3  12  -4 3047.70  225.28
   3 -12  -4 3153.68  225.88
   3  12  -3 2073.49  154.98
   3 -12  -3 2172.78  155.48
  -3  12   2 2336.57  161.58
   3  12  -2 2184.28  162.08
   3 -12  -2 2150.58  162.88
   3  12  -1  120.09   14.00
   3 -12  -1  110.69   16.70
  -3  12   0  299.87   25.20
   3  12   0  327.57   25.10
  -3  12  -1   78.89   10.60
   3  12   1   88.39   10.10
   3 -12   1  143.89   18.20
   3  12   2 1076.19   76.99
  -3  12  -2 1045.00   77.29
   3 -12   2 1025.60   78.49
  -3  12  -3  387.66   32.40
   3  12   3  433.76   31.50
  -3 -12  -3  424.96   32.10
   3 -12   3  378.26   34.60
  -3  12  -4  515.55   39.40
   3  12   4  502.35   38.40
   3 -12   4  499.15   41.60
  -3 -12  -4  503.75   39.20
  -3  12  -5 1347.87  100.69
   3  12   5 1381.56  100.09
  -3 -12  -5 1379.36  100.79
   3 -12   5 1358.36  102.29
   3  12   6 1228.98   89.59
  -3  12  -6 1071.69   91.79
   3 -12   6 1269.47   92.59
  -3 -12  -6 1285.27   90.79
   3  12   7   10.60    9.80
  -3  12  -7    4.70   13.00
  -3 -12  -7    4.40   14.70
   3 -12   7   -9.30   18.30
  -3  12  -8   21.40   13.90
   3  12   8   14.50   12.20
  -3 -12  -8   15.50   16.90
   3 -12   8   -3.00   19.40
  -3  12  -9   37.80   15.90
   3  12   9   44.10   14.70
   3 -12   9   32.90   23.40
  -3 -12  -9   38.40   20.70
  -3  12 -10  237.78   27.00
   3 -12  10  253.97   33.60
  -3 -12 -10  280.07   31.30
  -3  12 -11  101.39   19.60
  -3 -12 -11   94.59   26.80
   3 -12  11   45.30   31.00
   3  13 -12   13.10   18.60
   3  13 -12    4.90   31.50
   3 -13 -12   10.80   30.50
   3  13 -11   37.30   25.40
   3  13 -11   24.50   18.40
   3 -13 -11   43.50   27.30
   3  13 -10   55.29   16.80
   3  13 -10   28.10   21.00
   3 -13 -10   19.00   23.70
   3  13  -9   84.99   16.40
   3  13  -9   89.79   19.50
   3 -13  -9   64.99   22.50
   3  13  -8  722.83   57.89
   3 -13  -8  712.33   59.39
   3  13  -7  162.68   22.20
   3  13  -7  171.08   19.20
   3 -13  -7  175.68   23.70
   3  13  -6    3.80   12.90
   3  13  -6    2.80   12.20
   3 -13  -6   -1.10   15.90
   3  13  -5  402.06   34.80
   3  13  -5  408.06   34.00
   3 -13  -5  435.26   35.80
   3  13  -4 1266.77   93.19
   3  13  -4 1234.38   93.39
   3 -13  -4 1294.17   94.09
  -3  13   3  138.39   13.60
   3  13  -3  188.58   18.20
   3 -13  -3  126.09   17.60
  -3  13   2 2651.33  184.98
   3  13  -2 2511.15  185.48
  -3 -13   2 2515.45  185.08
   3 -13  -2 2512.05  186.08
  -3  13   1  708.33   53.99
   3  13  -1  729.13   54.49
   3 -13  -1  755.02   57.29
   3  13   0  476.15   37.90
  -3  13   0  465.65   38.10
   3 -13   0  571.64   41.10
  -3  13  -1  144.29   15.20
   3  13   1  179.48   15.90
   3 -13   1  188.28   21.40
  -3  13  -2   35.80    9.60
   3  13   2   54.19    8.30
   3 -13   2   52.79   13.70
   3  13   3   34.40    7.80
  -3  13  -3   26.60    9.50
  -3 -13  -3   37.50    9.00
   3 -13   3   20.70   13.20
  -3  13  -4   26.00   10.30
   3  13   4   37.10    8.30
   3 -13   4   30.00   14.30
  -3 -13  -4   31.40   10.10
  -3  13  -5   38.00   11.50
   3  13   5   24.10    8.90
   3 -13   5   28.20   15.10
  -3 -13  -5   28.50   11.50
  -3  13  -6  762.22   60.69
   3  13   6  826.22   59.79
   3 -13   6  796.62   63.19
  -3 -13  -6  807.92   61.29
  -3  13  -7  389.86   33.10
   3  13   7  376.16   31.40
  -3 -13  -7  389.36   35.00
   3 -13   7  370.26   37.70
   3  13   8   60.79   12.70
  -3  13  -8   43.70   15.50
  -3 -13  -8   60.29   18.40
   3 -13   8   46.30   21.20
   3  13   9   96.29   16.50
  -3  13  -9   86.49   17.80
   3 -13   9  106.99   25.00
  -3 -13  -9  103.09   22.30
  -3  13 -10  125.49   20.20
  -3 -13 -10  132.19   26.20
   3 -13  10  123.89   28.60
   3 -13  11    5.50   29.10
   3  14 -12   18.10   19.70
   3  14 -12    0.00   30.20
   3 -14 -12   41.90   32.60
   3  14 -11  524.45   44.90
   3  14 -11  487.85   56.79
   3 -14 -11  494.55   52.29
   3  14 -10   12.80   21.10
   3  14 -10    4.80   16.80
   3 -14 -10   11.80   24.50
   3  14  -9 1023.10   79.29
   3  14  -9  979.00   76.49
   3 -14  -9 1017.40   79.59
   3  14  -8   40.50   16.20
   3  14  -8   36.60   15.20
   3 -14  -8   29.50   20.10
   3  14  -7   -3.30   13.90
   3  14  -7   -2.40   14.90
   3  14  -6   -1.40   13.30
   3  14  -6    6.90   12.30
   3 -14  -6   -2.20   16.50
   3  14  -5  331.17   27.90
   3  14  -5  294.17   28.30
   3 -14  -5  313.57   30.20
   3  14  -4   16.00   11.70
   3 -14  -4   11.20   14.00
  -3  14   3 6632.24  475.85
   3  14  -3 6379.36  476.45
  -3 -14   3 6563.24  476.25
   3 -14  -3 6701.43  476.85
   3  14  -2  316.37   24.50
  -3  14   2  293.27   22.40
  -3 -14   2  264.47   23.30
   3 -14  -2  197.08   27.70
   3  14  -1  154.48   15.60
  -3  14   1  105.49   12.70
   3 -14  -1  182.68   23.20
   3  14   0  421.16   34.30
  -3  14   0  412.16   34.20
   3 -14   0  511.85   37.80
  -3  14  -1  135.39   14.90
   3  14   1  164.28   15.70
   3 -14   1  197.18   23.30
   3  14   2  123.99   12.80
  -3  14  -2   92.89   12.10
   3 -14   2  104.39   16.50
   3  14   3  424.06   32.20
  -3  14  -3  426.76   32.90
   3 -14   3  375.56   36.40
  -3 -14  -3  407.86   32.40
   3  14   4   46.50    9.00
  -3  14  -4   45.00   11.00
  -3 -14  -4   38.80   10.70
   3 -14   4   49.20   15.60
  -3  14  -5 2695.33  196.98
   3  14   5 2689.43  196.28
   3 -14   5 2642.24  198.08
  -3 -14  -5 2771.52  196.78
   3  14   6    1.40    9.80
  -3  14  -6   20.50   12.70
  -3 -14  -6    9.50   13.50
   3 -14   6   26.20   17.80
   3  14   7  282.17   25.20
  -3  14  -7  267.77   27.50
   3 -14   7  308.67   33.10
  -3 -14  -7  259.37   29.50
   3  14   8   86.29   14.50
  -3  14  -8   96.09   17.00
  -3 -14  -8   85.29   19.30
   3 -14   8   80.99   22.40
   3  14   9    0.50   15.10
  -3  14  -9    8.60   17.10
   3 -14   9   10.70   25.70
  -3 -14  -9   14.20   20.80
  -3  14 -10   18.20   18.00
   3 -14  10    2.70   26.30
  -3 -14 -10   31.60   24.40
   3  15 -11  218.08   25.80
   3  15 -11  207.98   41.60
   3 -15 -11  206.88   34.00
   3  15 -10   22.30   18.20
   3  15 -10   -0.10   23.70
   3 -15 -10   30.90   26.00
   3  15  -9   95.59   25.00
   3  15  -9   83.39   18.70
   3 -15  -9   77.69   23.60
   3  15  -8  846.62   67.29
   3  15  -8  831.42   65.49
   3 -15  -8  842.42   68.49
   3  15  -7  229.68   27.00
   3 -15  -7  229.38   31.40
   3  15  -6  -10.30   13.10
   3  15  -6    4.70   12.80
   3 -15  -6    2.50   16.90
   3  15  -5    8.50   12.80
   3 -15  -5   10.10   15.40
  -3  15   4  970.80   71.59
   3  15  -4  945.91   73.09
   3 -15  -4 1015.30   74.39
  -3  15   3  475.55   34.40
   3  15  -3  466.45   36.40
  -3 -15   3  413.76   36.10
   3 -15  -3  447.26   38.80
  -3  15   2 1800.72  127.49
   3  15  -2 1740.73  128.19
  -3 -15   2 1759.62  127.69
   3 -15  -2 1695.73  129.09
  -3  15   1   -1.40    8.60
   3  15  -1   38.10   10.10
   3 -15  -1   43.80   15.40
   3  15   0  700.83   53.89
  -3  15   0  705.63   53.79
   3 -15   0  758.02   56.39
  -3  15  -1   37.00   10.90
   3  15   1   71.69    9.80
   3 -15   1  101.29   15.80
  -3  15  -2   11.20    9.90
   3  15   2   23.10    8.40
   3 -15   2   19.50   13.70
   3  15   3  686.73   50.59
  -3  15  -3  680.93   51.59
   3 -15   3  623.74   53.49
  -3 -15  -3  704.33   50.99
  -3  15  -4  210.88   22.20
   3  15   4  235.08   20.30
   3 -15   4  210.08   27.80
  -3 -15  -4  222.18   21.90
   3  15   5  273.27   24.70
  -3  15  -5  289.47   28.60
   3 -15   5  284.97   38.80
  -3 -15  -5  309.27   27.50
  -3  15  -6 1361.46   99.89
   3  15   6 1297.37   98.79
   3 -15   6 1345.37  101.69
  -3 -15  -6 1379.96  100.09
   3  15   7   14.20   11.20
  -3  15  -7   35.80   14.90
   3 -15   7    8.00   20.00
  -3 -15  -7   20.60   16.40
  -3  15  -8   16.80   15.80
   3  15   8    5.70   13.80
   3 -15   8   13.50   21.90
  -3 -15  -8   -0.50   18.40
   3  15   9  103.89   19.50
  -3  15  -9   99.19   19.50
   3 -15   9  109.79   26.50
  -3 -15  -9  105.19   23.40
  -3  15 -10   77.29   19.90
   3 -15  10   52.19   31.60
  -3 -15 -10   74.19   25.20
   3  16 -11  398.76   39.30
   3  16 -11  389.76   51.09
   3 -16 -11  367.56   50.79
   3  16 -10   49.20   19.90
   3  16 -10   36.10   25.50
   3 -16 -10   64.59   27.10
   3  16  -9  189.88   29.40
   3  16  -9  191.58   22.10
   3 -16  -9  120.09   27.50
   3  16  -8  605.54   50.19
   3  16  -8  647.34   52.69
   3 -16  -8  600.54   54.69
   3  16  -7  147.89   19.60
   3  16  -7  120.89   19.20
   3 -16  -7  131.09   21.90
   3  16  -6  172.18   19.50
   3 -16  -6  169.88   22.80
   3  16  -5  -20.50   13.00
   3 -16  -5    8.70   16.40
  -3  16   4  850.21   64.09
   3  16  -4  832.72   65.69
   3 -16  -4  939.41   67.29
  -3 -16   4  863.71   65.79
   3  16  -3 1435.06  108.29
  -3  16   3 1480.75  107.29
  -3 -16   3 1507.95  107.99
   3 -16  -3 1453.95  108.99
   3  16  -2   68.19   12.00
  -3  16   2   73.99    9.80
   3 -16  -2   22.20   15.40
  -3 -16   2   69.79   11.40
  -3  16   1   93.79   12.10
   3  16  -1  118.39   13.40
   3 -16  -1   93.89   18.00
  -3  16   0 1105.79   78.89
   3  16   0 1031.00   78.89
   3 -16   0 1071.89   80.79
  -3  16  -1  652.83   48.40
   3  16   1  622.14   47.60
   3 -16   1  618.04   50.49
  -3  16  -2 1461.35  101.99
   3  16   2 1375.26  101.59
   3 -16   2 1303.47  103.19
  -3 -16  -2 1402.66  101.29
   3  16   3  344.77   27.70
  -3  16  -3  341.27   29.20
  -3 -16  -3  351.66   28.20
   3 -16   3  308.67   32.20
  -3  16  -4    4.00   11.80
   3  16   4   11.90    9.10
  -3 -16  -4   10.20   11.10
   3 -16   4    5.90   15.80
   3  16   5  778.82   58.39
  -3  16  -5  792.42   59.39
  -3 -16  -5  795.52   59.29
   3 -16   5  727.33   61.69
   3  16   6 1001.40   76.19
  -3  16  -6 1013.00   77.29
  -3 -16  -6 1041.20   77.59
   3 -16   6 1044.50   80.79
  -3  16  -7   14.20   15.30
   3  16   7   14.60   12.20
   3 -16   7    4.20   20.80
  -3 -16  -7    1.70   16.40
  -3  16  -8  223.08   23.70
   3  16   8  211.58   21.70
   3 -16   8  177.38   29.10
  -3 -16  -8  205.58   25.10
  -3  16  -9  108.69   20.20
   3 -16   9   98.69   27.80
  -3 -16  -9  104.29   23.80
  -3  16 -10  259.87   28.40
  -3 -16 -10  274.07   32.80
   3 -16  10  260.07   36.20
   3  17 -11  129.09   29.70
   3  17 -11  121.89   23.60
   3 -17 -11  107.39   30.60
   3  17 -10  -14.70   25.40
   3  17 -10  -20.30   19.00
   3 -17 -10    7.80   26.40
   3  17  -9    8.90   18.50
   3  17  -9    9.30   21.80
   3 -17  -9    8.50   25.10
   3  17  -8  361.36   35.20
   3 -17  -8  373.26   41.00
   3  17  -7  110.29   19.00
   3 -17  -7  136.29   22.50
   3  17  -6  306.57   34.30
   3 -17  -6  397.86   36.50
   3  17  -5   10.30   14.40
  -3  17   5   23.60    8.20
   3 -17  -5   14.70   17.30
  -3 -17   5   27.10   14.70
  -3  17   4  165.58   16.20
   3  17  -4  141.19   17.70
  -3 -17   4  153.08   17.50
   3 -17  -4  165.68   20.50
   3  17  -3  324.77   28.90
  -3  17   3  298.87   26.40
  -3 -17   3  342.67   28.70
   3 -17  -3  344.57   32.10
  -3  17   2    3.30    8.90
   3  17  -2   14.90   12.20
  -3 -17   2   19.70   11.30
   3 -17  -2  -20.50   14.90
   3  17  -1   28.60   10.70
  -3  17   1    1.30    9.30
  -3 -17   1   11.10   10.50
   3 -17  -1   11.00   16.10
  -3  17   0  971.40   72.59
   3  17   0  957.70   72.89
   3 -17   0 1012.70   75.29
  -3  17  -1   77.79   12.30
   3  17   1   76.89   11.20
   3 -17   1   99.79   17.80
   3  17   2 1171.38   89.39
  -3  17  -2 1282.67   89.99
   3 -17   2 1158.08   91.49
  -3 -17  -2 1251.77   89.19
   3  17   3  116.89   13.10
  -3  17  -3  109.39   15.20
  -3 -17  -3  129.69   13.70
   3 -17   3   95.49   19.00
  -3  17  -4  281.57   34.30
   3  17   4  324.57   26.10
  -3 -17  -4  311.67   27.60
   3 -17   4  282.97   31.70
  -3  17  -5   15.60   13.30
   3  17   5   22.40   10.40
   3 -17   5   27.60   19.00
  -3 -17  -5   28.70   13.50
   3  17   6  631.14   50.99
  -3  17  -6  650.43   52.29
   3 -17   6  652.33   55.49
  -3 -17  -6  695.33   52.69
  -3  17  -7  141.39   19.60
   3  17   7  123.69   16.30
   3 -17   7  147.39   25.00
  -3 -17  -7  140.59   20.50
  -3  17  -8    1.10   16.90
   3  17   8  -11.70   17.10
  -3 -17  -8  -16.50   19.30
   3 -17   8   -5.50   23.50
  -3  17  -9   47.70   19.20
   3  17   9   29.40   19.60
   3 -17   9   30.70   27.00
  -3 -17  -9   47.40   22.80
  -3  17 -10  118.59   22.10
  -3 -17 -10   89.99   26.90
   3 -17  10  110.19   33.00
   3  18 -11  102.69   23.70
   3 -18 -11   87.49   31.40
   3  18 -10   90.49   22.60
   3 -18 -10   97.69   28.50
   3  18  -9   84.29   19.90
   3 -18  -9   75.39   26.70
   3  18  -8  139.19   21.60
   3 -18  -8  160.88   26.10
   3  18  -7 1000.50   78.99
   3 -18  -7 1069.99   80.49
   3  18  -6  293.27   29.40
   3 -18  -6  279.97   38.80
   3  18  -5  480.85   45.70
  -3  18   5  515.75   40.40
  -3 -18   5  565.04   43.70
   3 -18  -5  559.94   46.10
  -3  18   4  122.19   13.10
   3  18  -4  133.99   17.30
   3 -18  -4  117.59   19.80
  -3 -18   4  124.09   16.60
  -3  18   3   55.09   10.20
   3  18  -3   43.90   13.50
  -3 -18   3   60.19   13.10
   3 -18  -3   58.29   16.80
   3  18  -2  312.57   27.20
  -3  18   2  284.27   25.30
  -3 -18   2  290.87   26.20
   3 -18  -2  285.57   30.30
  -3  18   1   77.19   11.30
   3  18  -1   70.89   13.00
  -3 -18   1   66.09   12.90
   3 -18  -1   84.59   17.80
   3  18   0  397.86   33.50
  -3  18   0  405.56   33.20
   3 -18   0  414.46   38.10
   3  18   1 3737.63  279.67
  -3  18  -1 4010.50  279.87
   3 -18   1 3805.02  280.67
  -3  18  -2  385.66   30.60
   3  18   2  336.77   28.90
  -3 -18  -2  361.56   29.00
   3 -18   2  325.77   35.00
  -3  18  -3    3.80   12.30
   3  18   3   17.20    9.50
  -3 -18  -3    2.40   11.10
   3 -18   3    2.70   17.10
  -3  18  -4  161.38   18.70
   3  18   4  180.88   18.50
  -3 -18  -4  153.78   20.40
  -3  18  -5    5.70   14.10
   3  18   5    6.20   10.20
  -3 -18  -5   -1.20   14.00
   3 -18   5   10.10   18.20
  -3  18  -6  251.47   28.00
   3  18   6  246.98   25.50
   3 -18   6  239.88   28.80
  -3 -18  -6  265.77   28.40
  -3  18  -7  373.56   35.70
   3  18   7  386.26   33.60
  -3 -18  -7  390.66   37.40
   3 -18   7  355.96   42.90
  -3  18  -8  277.77   30.60
   3  18   8  237.08   29.50
  -3 -18  -8  265.67   29.40
   3 -18   8  293.67   36.40
  -3  18  -9  434.16   41.40
  -3 -18  -9  455.75   46.10
   3 -18   9  436.36   52.09
  -3  18 -10   81.59   21.80
   3 -18  10   62.19   32.60
  -3 -18 -10   55.59   26.90
   3  19 -11   20.60   22.10
   3 -19 -11  -24.00   31.80
   3  19 -10   22.80   21.20
   3 -19 -10   12.70   28.50
   3  19  -9   88.49   20.80
   3 -19  -9   93.29   27.20
   3  19  -8   82.79   21.60
   3 -19  -8  144.59   25.70
   3  19  -7  149.19   21.20
   3 -19  -7  133.39   24.80
   3  19  -6  233.88   28.80
  -3 -19   6  297.87   30.20
   3 -19  -6  260.27   32.60
   3  19  -5  115.49   17.90
  -3  19   5   98.09   12.20
  -3 -19   5  108.99   17.80
   3 -19  -5  105.29   19.90
  -3  19   4  618.04   50.89
   3  19  -4  688.63   52.89
  -3 -19   4  730.33   53.19
   3 -19  -4  680.93   54.99
  -3  19   3  -12.40    9.90
   3  19  -3    6.70   13.30
  -3 -19   3   -3.00   12.90
   3 -19  -3   -8.50   16.50
  -3  19   2   -2.30   10.20
   3  19  -2    4.40   12.40
   3 -19  -2  -20.10   16.50
  -3 -19   2   -0.20   12.40
   3  19  -1   -1.80   11.90
  -3  19   1   17.60   10.70
  -3 -19   1  -18.30   12.40
   3 -19  -1   -0.20   17.20
  -3  19   0  402.96   34.90
   3  19   0  372.76   33.00
  -3 -19   0  406.06   32.20
   3 -19   0  437.36   38.40
   3  19   1   71.39   11.70
  -3  19  -1   77.99   13.20
  -3 -19  -1   61.59   10.60
   3 -19   1   37.30   17.90
  -3  19  -2 1946.51  137.29
   3  19   2 1833.42  136.89
   3 -19   2 1768.72  138.29
  -3 -19  -2 1930.51  136.59
  -3  19  -3  213.98   20.90
   3  19   3  188.38   19.10
  -3 -19  -3  172.08   20.70
   3 -19   3  177.98   23.70
   3  19   4  301.97   26.50
  -3  19  -4  296.47   29.10
  -3 -19  -4  314.37   28.30
   3 -19   4  279.57   33.80
  -3  19  -5  147.79   20.00
   3  19   5  219.98   20.10
   3 -19   5  122.79   23.10
  -3 -19  -5  131.49   18.70
  -3  19  -6  165.38   21.00
   3  19   6  158.08   18.00
  -3 -19  -6  174.08   21.10
   3 -19   6  142.09   26.30
   3  19   7   -0.10   13.60
  -3  19  -7   22.40   17.20
   3 -19   7   -8.10   23.30
  -3 -19  -7    4.00   18.10
   3  19   8  -18.90   16.90
  -3  19  -8   23.10   19.00
  -3 -19  -8  -12.60   20.50
   3 -19   8   -8.00   25.90
  -3  19  -9   64.39   20.80
  -3 -19  -9   44.30   24.20
   3 -19   9   66.29   29.40
   3 -19  10  246.48   37.90
   3 -20 -11  -16.00   30.60
   3  20 -10   23.10   22.80
   3 -20 -10    8.20   28.70
   3  20  -9   19.30   21.20
   3 -20  -9    5.20   27.00
  -3 -20   8  187.78   29.50
   3 -20  -8  180.18   29.00
   3  20  -7 1540.35  118.39
   3 -20  -7 1568.24  119.89
  -3 -20   7 1650.93  119.39
   3  20  -6    8.00   17.30
  -3  20   6   16.00    9.30
  -3 -20   6   -2.60   17.80
   3 -20  -6   11.50   21.30
   3  20  -5 1013.60   74.19
  -3  20   5  848.42   71.79
  -3 -20   5 1013.40   74.39
   3 -20  -5 1035.70   75.79
   3  20  -4  425.36   36.70
  -3  20   4  366.06   33.20
  -3 -20   4  448.96   36.80
   3 -20  -4  426.66   38.90
  -3  20   3   10.00   11.00
   3  20  -3    5.60   14.00
  -3 -20   3   19.00   13.70
   3 -20  -3    5.60   17.50
   3  20  -2    4.30   12.50
  -3  20   2   -7.40   10.80
   3 -20  -2  -18.50   17.00
  -3 -20   2  -13.10   13.30
  -3  20   1  742.93   57.59
   3  20  -1  750.42   58.19
   3 -20  -1  770.72   60.79
  -3 -20   1  778.32   57.89
   3  20   0  234.78   23.70
  -3  20   0  219.28   24.30
   3 -20   0  240.38   27.10
  -3 -20   0  267.57   23.00
  -3  20  -1 2146.69  153.28
   3  20   1 2022.90  152.98
  -3 -20  -1 2163.58  152.58
   3 -20   1 2039.80  154.78
  -3  20  -2  262.07   26.20
   3  20   2  263.87   25.10
   3 -20   2  263.37   32.00
  -3 -20  -2  267.57   24.50
  -3  20  -3  481.55   38.80
   3  20   3  432.36   37.50
   3 -20   3  470.35   42.90
  -3 -20  -3  469.65   37.70
  -3  20  -4    4.00   15.00
   3  20   4   17.80   11.60
   3 -20   4    2.40   19.40
  -3 -20  -4    8.40   13.10
   3  20   5   -0.30   11.60
  -3  20  -5  -10.90   15.40
  -3 -20  -5   -0.50   14.80
   3 -20   5    2.10   21.40
   3  20   6  191.18   22.10
  -3  20  -6  169.28   22.60
   3 -20   6  192.78   27.10
  -3 -20  -6  220.38   27.00
  -3  20  -7  472.45   43.30
   3  20   7  434.86   40.80
  -3 -20  -7  515.05   44.70
   3 -20   7  554.44   51.39
   3  20   8  -24.20   18.00
  -3  20  -8    5.40   20.00
   3 -20   8    0.90   28.20
  -3 -20  -8  -16.10   20.90
  -3  20  -9  427.66   43.90
  -3 -20  -9  482.15   47.70
   3 -20   9  473.85   55.69
   3  21 -10    7.40   22.50
  -3 -21  10   -6.80   30.80
   3 -21 -10    6.60   29.60
   3  21  -9    6.70   22.00
   3 -21  -9    3.80   27.40
  -3 -21   9   -7.00   31.60
   3  21  -8  121.29   23.40
   3 -21  -8  146.09   27.20
  -3 -21   8  139.09   27.80
   3  21  -7  194.28   25.30
   3 -21  -7  204.98   28.50
  -3 -21   7  247.08   31.30
  -3  21   6    9.20   10.60
   3  21  -6   -0.20   17.30
  -3 -21   6   28.40   18.80
   3 -21  -6   40.00   20.70
  -3  21   5    8.30   10.70
   3  21  -5   15.80   16.70
  -3 -21   5   13.20   17.50
   3 -21  -5   22.30   21.70
   3  21  -4 1262.97   90.59
  -3  21   4 1075.99   88.99
  -3 -21   4 1283.17   90.59
   3 -21  -4 1219.78   91.79
   3  21  -3  254.37   30.60
  -3  21   3  181.08   22.00
   3 -21  -3  216.18   28.40
  -3 -21   3  238.18   25.60
  -3  21   2  440.96   37.40
   3  21  -2  471.95   38.60
   3 -21  -2  449.36   40.60
  -3 -21   2  497.35   38.80
   3  21  -1   42.30   13.50
  -3  21   1   30.70   11.80
   3 -21  -1   59.29   18.50
  -3 -21   1   37.10   13.90
  -3  21   0   19.70   12.20
   3  21   0    9.20   12.70
  -3 -21   0   25.90   11.90
   3 -21   0   13.40   19.30
  -3  21  -1   37.60   13.20
   3  21   1   32.50   12.20
   3 -21   1   24.20   20.00
  -3 -21  -1   39.20   11.60
   3  21   2  628.34   50.09
  -3  21  -2  674.73   51.49
  -3 -21  -2  674.13   50.09
   3 -21   2  620.44   53.59
   3  21   3  220.58   22.10
  -3  21  -3  206.78   25.30
  -3 -21  -3  220.68   23.60
  -3  21  -4  477.85   41.00
   3  21   4  466.05   39.00
  -3 -21  -4  492.35   39.90
   3 -21   4  466.65   45.80
  -3  21  -5    9.60   16.60
   3  21   5   24.10   12.90
   3 -21   5   14.20   21.20
  -3 -21  -5   -4.30   15.50
  -3  21  -6  230.98   25.80
   3  21   6  215.48   24.40
  -3 -21  -6  260.87   29.00
   3 -21   6  195.38   29.10
   3  21   7   60.69   15.60
  -3  21  -7   60.99   20.80
  -3 -21  -7   42.90   19.80
   3 -21   7   31.10   25.70
  -3  21  -8   17.60   20.50
   3  21   8   -1.20   18.90
   3 -21   8   30.50   27.60
  -3 -21  -8   -2.00   21.60
  -3  21  -9   33.10   23.20
   3 -21   9   15.40   31.70
  -3 -21  -9   -8.50   24.60
   3  22 -10   83.69   25.00
  -3 -22  10   86.69   33.80
   3 -22 -10   80.49   30.90
   3  22  -9  105.29   24.50
   3 -22  -9  111.49   30.80
  -3 -22   9  145.89   35.80
   3  22  -8  353.26   37.50
   3 -22  -8  333.97   42.90
  -3 -22   8  348.87   42.80
   3  22  -7  637.14   55.29
  -3 -22   7  666.03   56.39
   3 -22  -7  646.74   57.19
   3  22  -6  573.84   46.60
  -3  22   6  453.55   42.40
   3 -22  -6  566.24   49.50
  -3 -22   6  630.54   47.50
  -3  22   5   82.29   12.80
   3  22  -5   67.79   17.90
  -3 -22   5   64.79   19.80
   3 -22  -5   74.09   26.00
   3  22  -4  272.47   27.50
  -3  22   4  197.48   24.10
  -3 -22   4  286.47   29.60
   3 -22  -4  252.87   29.90
  -3  22   3  215.88   22.80
   3  22  -3  210.88   22.50
  -3 -22   3  213.98   26.70
   3 -22  -3  220.18   25.60
  -3  22   2  340.47   31.20
  -3 -22   2  389.46   33.90
   3 -22  -2  366.36   36.10
  -3  22   1  167.08   18.60
   3  22  -1  217.48   20.40
  -3 -22   1  165.08   21.90
   3 -22  -1  189.68   24.10
  -3  22   0  809.32   63.99
   3  22   0  845.22   64.89
  -3 -22   0  867.51   63.69
   3 -22   0  860.81   67.79
   3  22   1  212.08   23.50
  -3  22  -1  210.38   25.40
   3 -22   1  234.28   26.90
  -3 -22  -1  230.38   22.50
   3  22   2  627.34   49.10
  -3  22  -2  608.74   50.59
   3 -22   2  622.94   53.99
  -3 -22  -2  654.83   49.00
  -3  22  -3  136.79   20.40
   3  22   3  191.78   21.90
  -3 -22  -3  207.08   21.90
   3 -22   3  133.49   25.40
  -3  22  -4  345.47   34.30
   3  22   4  366.46   32.30
   3 -22   4  370.66   40.50
  -3 -22  -4  370.76   34.70
  -3  22  -5  385.66   37.50
   3  22   5  409.46   35.10
   3 -22   5  389.56   42.00
  -3 -22  -5  418.86   37.20
   3  22   6  152.98   19.80
  -3  22  -6  139.79   22.10
  -3 -22  -6  167.78   22.80
   3 -22   6  151.58   28.20
  -3  22  -7   42.30   21.00
   3  22   7   34.10   18.50
   3 -22   7   18.10   26.70
  -3 -22  -7   54.19   20.80
  -3  22  -8  290.07   34.50
  -3 -22  -8  280.17   38.40
   3 -22   8  278.87   38.80
  -3  22  -9   89.19   24.70
   3 -22   9   59.29   34.30
  -3 -22  -9   75.89   25.80
   3  23 -10   20.70   25.10
   3 -23 -10   66.69   32.70
  -3 -23  10   41.60   34.80
   3  23  -9   33.30   23.40
  -3 -23   9    7.80   34.10
   3 -23  -9   36.70   28.40
   3  23  -8  337.77   40.60
  -3 -23   8  369.56   45.80
   3 -23  -8  326.27   42.90
   3  23  -7  -15.20   20.10
   3 -23  -7   -3.40   24.30
  -3 -23   7    1.50   22.90
   3  23  -6   27.70   19.00
  -3  23   6   20.90   12.40
  -3 -23   6   26.80   24.50
   3 -23  -6   -7.00   22.10
   3  23  -5  299.97   31.30
  -3  23   5  259.57   26.80
  -3 -23   5  327.57   31.70
   3 -23  -5  263.57   34.70
  -3  23   4  191.08   23.10
   3  23  -4  199.98   23.30
   3 -23  -4  249.18   28.80
  -3 -23   4  234.98   29.20
  -3  23   3   75.49   14.20
   3  23  -3   71.69   16.40
  -3 -23   3   94.29   18.80
   3 -23  -3   59.89   20.00
   3  23  -2  545.45   43.90
  -3  23   2  493.15   42.80
  -3 -23   2  544.25   44.50
   3 -23  -2  563.04   46.90
   3  23  -1   19.20   17.40
  -3  23   1   15.10   12.60
  -3 -23   1   19.60   14.90
   3 -23  -1    9.20   19.40
  -3  23   0  111.39   17.10
  -3 -23   0  156.08   19.40
   3 -23   0  132.69   23.70
   3  23   1  267.37   26.60
  -3  23  -1  235.48   28.70
   3 -23   1  277.47   32.40
  -3 -23  -1  276.47   25.60
   3  23   2  304.57   27.00
  -3  23  -2  258.17   28.70
   3 -23   2  264.77   38.50
  -3 -23  -2  279.87   26.90
   3  23   3   38.70   14.20
  -3  23  -3   16.30   16.30
   3 -23   3   30.00   22.00
  -3 -23  -3   18.10   14.60
   3  23   4   56.69   15.20
  -3  23  -4   58.69   18.30
   3 -23   4   49.50   23.60
  -3 -23  -4   56.49   16.60
  -3  23  -5  154.18   22.80
   3  23   5  178.48   21.00
   3 -23   5  154.28   29.10
  -3 -23  -5  143.79   20.80
   3  23   6  341.47   35.10
  -3  23  -6  332.67   36.30
   3 -23   6  324.17   42.30
  -3 -23  -6  382.76   36.80
  -3  23  -7   12.60   22.10
   3 -23   7    2.80   28.80
  -3 -23  -7  -20.20   19.80
  -3  23  -8   32.80   22.70
   3  23   8    4.60   22.90
   3 -23   8   21.60   29.90
  -3 -23  -8   21.70   23.90
  -3 -23  -9   38.40   26.80
   3 -23   9   27.40   34.50
   3 -24 -10   17.70   31.50
  -3 -24  10   37.50   35.20
   3  24  -9  384.96   40.50
   3 -24  -9  318.37   41.00
  -3 -24   9  366.16   46.70
   3  24  -8   62.09   24.30
   3 -24  -8   48.10   27.80
  -3 -24   8   70.89   30.20
   3  24  -7    3.30   21.40
  -3 -24   7    9.30   25.30
   3 -24  -7   18.80   24.70
   3  24  -6  354.36   34.80
  -3  24   6  294.17   29.70
  -3 -24   6  350.86   42.40
   3 -24  -6  327.77   38.50
  -3  24   5   56.29   13.70
   3  24  -5   45.90   18.70
  -3 -24   5   58.79   21.30
   3 -24  -5   48.70   22.40
   3  24  -4    3.30   17.00
  -3  24   4    9.00   13.10
   3 -24  -4   -4.60   24.40
  -3 -24   4    4.30   19.50
   3  24  -3  939.01   69.19
  -3  24   3  851.11   67.89
  -3 -24   3  939.61   70.29
   3 -24  -3  861.91   70.89
  -3  24   2  183.88   20.10
   3  24  -2  211.38   22.00
  -3 -24   2  190.88   23.10
   3 -24  -2  191.48   24.80
  -3  24   1  266.47   28.10
   3  24  -1  324.17   30.00
   3 -24  -1  301.47   33.00
  -3 -24   1  328.97   29.90
  -3  24   0  151.08   18.70
   3  24   0  120.69   19.00
  -3 -24   0  174.18   20.60
   3 -24   0  164.88   25.00
  -3  24  -1  -20.00   14.80
  -3 -24  -1   24.90   13.10
  -3  24  -2   88.29   19.20
   3  24   2  140.59   24.20
  -3 -24  -2  129.59   16.90
   3 -24   2  152.08   25.30
  -3  24  -3  306.47   33.60
   3  24   3  349.77   33.20
  -3 -24  -3  360.96   31.90
   3 -24   3  329.47   40.30
  -3  24  -4   74.79   19.60
   3  24   4   84.59   19.40
  -3 -24  -4   78.09   17.60
   3 -24   4   61.59   26.70
  -3  24  -5  891.61   72.59
  -3 -24  -5  979.60   72.29
   3 -24   5  895.21   75.89
  -3  24  -6   13.20   20.50
   3 -24   6  -13.50   27.20
  -3 -24  -6   24.10   19.50
  -3  24  -7   76.89   23.00
   3  24   7   48.70   21.90
  -3 -24  -7   87.89   24.00
   3 -24   7   74.19   30.30
  -3  24  -8  347.47   38.90
   3 -24   8  297.97   42.90
  -3 -24  -8  326.87   42.10
   3  25  -9   34.00   24.70
  -3 -25   9   46.70   30.60
   3 -25  -9   29.20   29.70
   3  25  -8  330.97   39.80
   3 -25  -8  315.07   44.40
  -3 -25   8  400.16   45.60
   3  25  -7   51.59   22.40
  -3 -25   7   57.09   27.20
   3 -25  -7   23.40   26.00
  -3  25   6    1.60   15.00
   3  25  -6   -3.00   19.90
   3 -25  -6  -12.20   23.50
  -3 -25   6   -5.50   23.50
  -3  25   5  206.28   23.30
   3  25  -5  175.38   24.30
  -3 -25   5  210.48   27.20
   3 -25  -5  186.38   27.40
   3  25  -4   -6.20   17.80
  -3  25   4    8.80   13.80
   3 -25  -4   20.60   21.40
  -3 -25   4    2.80   21.40
   3  25  -3    9.00   16.10
  -3  25   3   13.30   13.70
   3 -25  -3   26.40   37.00
  -3 -25   3   -1.50   19.40
   3  25  -2   80.19   17.50
  -3  25   2   73.39   15.60
   3 -25  -2   86.09   25.70
  -3 -25   2   67.69   19.30
   3  25  -1  221.38   25.80
  -3  25   1  203.58   21.90
   3 -25  -1  242.08   29.30
  -3 -25   1  208.18   25.40
   3  25   0  778.62   60.99
  -3 -25   0  781.72   59.79
   3  25   1   -3.00   16.00
  -3  25  -1  -24.40   15.60
  -3 -25  -1    6.60   13.70
   3 -25   1  -11.00   23.90
  -3  25  -2  262.87   34.00
   3  25   2  332.37   31.30
  -3 -25  -2  341.87   30.60
   3 -25   2  353.56   40.70
   3  25   3   32.80   15.90
  -3  25  -3   18.90   18.70
  -3 -25  -3   43.10   15.60
   3 -25   3   47.50   25.40
   3  25   4  -13.90   16.10
  -3  25  -4   -7.00   18.60
   3 -25   4   -2.30   25.20
  -3 -25  -4   -6.80   16.70
  -3  25  -5   29.10   20.00
   3  25   5   50.29   19.40
  -3 -25  -5   36.70   19.40
   3 -25   5   28.50   27.80
   3  25   6  361.26   39.10
  -3  25  -6  328.07   38.30
  -3 -25  -6  412.16   38.70
   3 -25   6  330.27   45.30
   3  25   7   89.49   23.10
  -3  25  -7   87.59   24.40
  -3 -25  -7   64.39   34.80
   3 -25   7   87.89   37.30
  -3  25  -8   11.00   24.40
  -3 -25  -8   12.20   37.90
   3 -25   8   -6.30   35.50
   3  26  -9  216.88   32.30
   3 -26  -9  271.17   36.40
  -3 -26   9  222.58   38.90
   3  26  -8   53.49   24.90
  -3 -26   8   18.80   29.10
   3 -26  -8   -5.50   27.90
   3  26  -7  -18.50   23.60
  -3 -26   7  -14.80   27.10
   3 -26  -7   14.10   26.80
   3  26  -6   -4.10   21.30
   3 -26  -6   12.10   25.20
  -3 -26   6   18.20   25.90
   3  26  -5   38.10   20.10
  -3  26   5   67.69   15.10
   3 -26  -5   38.40   23.40
  -3 -26   5   68.69   24.30
   3  26  -4  305.27   32.60
  -3  26   4  314.17   30.30
   3 -26  -4  298.07   36.60
  -3 -26   4  314.27   37.00
   3  26  -3  551.54   45.80
  -3  26   3  548.25   44.60
   3 -26  -3  531.55   48.70
  -3 -26   3  530.15   48.80
  -3  26   2  289.77   29.00
   3  26  -2  291.87   30.50
  -3 -26   2  266.27   32.20
   3 -26  -2  307.87   35.40
  -3  26   1  225.98   26.60
   3  26  -1  238.38   26.80
  -3 -26   1  216.28   26.90
   3 -26  -1  246.78   29.70
   3  26   0    4.70   16.10
  -3  26   0   -7.00   15.40
   3 -26   0   -5.30   22.70
  -3 -26   0   27.40   15.00
   3  26   1   45.40   16.20
  -3  26  -1    9.60   17.20
   3 -26   1   42.80   25.00
  -3 -26  -1   60.09   14.70
   3  26   2   -3.00   15.80
  -3  26  -2  -15.70   17.70
  -3 -26  -2    6.30   14.70
   3 -26   2   -4.50   25.50
   3  26   3  548.45   45.50
  -3  26  -3  486.15   47.20
  -3 -26  -3  576.74   45.30
   3 -26   3  557.54   53.79
   3  26   4  347.87   38.00
  -3  26  -4  380.66   40.30
  -3 -26  -4  434.46   37.40
   3 -26   4  386.16   49.20
  -3  26  -5  314.47   37.80
   3  26   5  338.47   36.40
  -3 -26  -5  385.26   36.40
   3 -26   5  393.86   46.80
  -3  26  -6  119.69   25.10
   3  26   6  124.99   23.60
  -3 -26  -6  147.49   22.70
   3 -26   6   98.99   33.40
  -3  26  -7   85.29   25.00
   3  26   7   52.29   23.80
   3 -26   7   60.09   32.40
  -3  26  -8  -16.70   25.70
   3 -26   8   -6.80   37.20
  -3 -27   9  272.47   40.10
   3 -27  -9  251.67   37.60
   3  27  -8  223.08   30.30
   3 -27  -8  155.18   32.50
  -3 -27   8  217.98   42.60
   3  27  -7    0.80   23.80
   3 -27  -7    0.40   27.10
  -3 -27   7    7.40   29.70
   3  27  -6    1.00   21.50
  -3 -27   6   -1.10   25.90
   3 -27  -6   -9.70   25.00
   3  27  -5   -8.30   20.10
  -3  27   5   13.30   15.30
  -3 -27   5  -31.20   27.10
   3 -27  -5  -10.70   23.70
  -3  27   4   94.49   17.20
   3  27  -4   91.19   20.60
   3 -27  -4   76.89   23.90
  -3 -27   4   77.99   26.00
  -3  27   3   25.90   15.30
   3  27  -3   14.70   17.80
   3 -27  -3    1.40   22.10
  -3 -27   3  -31.80   22.50
  -3  27   2   44.80   15.90
   3  27  -2   68.89   18.20
   3 -27  -2   70.99   22.70
  -3 -27   2   12.00   20.20
   3  27  -1  446.36   39.30
  -3  27   1  401.76   41.10
   3 -27  -1  456.55   44.00
  -3 -27   1  449.26   38.70
   3  27   0  402.86   35.90
  -3  27   0  349.96   36.30
   3 -27   0  365.86   42.00
  -3 -27   0  403.56   34.40
  -3  27  -1  156.48   22.50
   3  27   1  199.68   22.50
   3 -27   1  165.98   29.40
  -3 -27  -1  190.68   23.30
  -3  27  -2  171.98   23.90
   3  27   2  191.08   23.90
  -3 -27  -2  216.08   24.50
   3 -27   2  162.78   30.30
  -3  27  -3   51.39   20.40
   3  27   3   77.09   19.60
   3 -27   3   60.09   28.30
  -3 -27  -3   71.59   17.00
  -3  27  -4   -0.30   20.30
   3  27   4   -1.60   18.90
  -3 -27  -4   -4.30   17.30
   3 -27   4   -2.10   28.60
  -3  27  -5  204.78   29.00
   3  27   5  196.48   26.50
  -3 -27  -5  258.57   29.60
   3 -27   5  214.18   35.00
   3  27   6  175.98   26.80
  -3  27  -6  155.88   27.10
   3 -27   6   96.99   36.10
   3  27   7   62.09   26.20
  -3  27  -7   44.30   24.80
   3 -27   7   52.29   41.40
   3  28  -8   46.30   26.60
  -3 -28   8   19.00   38.10
   3 -28  -8   26.80   29.70
   3  28  -7  150.18   28.00
  -3 -28   7  184.88   35.60
   3 -28  -7  128.79   30.20
   3  28  -6  113.69   24.80
   3 -28  -6   90.39   27.40
  -3 -28   6   91.29   31.50
   3  28  -5   20.30   21.20
  -3  28   5   70.09   16.90
   3 -28  -5   48.30   24.80
  -3  28   4  446.06   37.70
   3  28  -4  421.96   40.10
  -3 -28   4  379.46   45.40
   3 -28  -4  394.16   43.00
   3  28  -3   44.70   19.60
  -3  28   3   59.69   16.50
   3 -28  -3   83.99   24.60
  -3 -28   3   21.70   23.40
  -3  28   2  889.41   80.99
   3  28  -2 1031.40   76.99
  -3 -28   2  965.00   76.49
   3 -28  -2 1013.10   77.79
  -3  28   1  145.89   20.50
   3  28  -1  142.29   21.70
   3 -28  -1  155.48   26.60
  -3 -28   1  152.78   20.60
   3  28   0   57.19   19.10
  -3  28   0   65.89   19.00
  -3 -28   0  118.29   17.20
   3 -28   0   39.60   25.90
   3  28   1  182.58   23.20
  -3  28  -1  155.38   23.10
  -3 -28  -1  188.58   23.30
   3 -28   1  140.29   29.70
   3  28   2   16.20   19.10
  -3  28  -2   18.00   19.80
   3 -28   2    9.80   28.40
  -3 -28  -2   51.79   15.30
  -3  28  -3  -26.80   19.90
   3  28   3  -16.90   19.50
  -3 -28  -3   -5.50   18.40
   3 -28   3  -34.40   29.20
  -3  28  -4  712.03   61.19
   3  28   4  769.22   61.49
   3 -28   4  746.63   68.49
  -3  28  -5   63.69   23.70
   3  28   5   18.50   21.40
   3 -28   5   26.50   35.60
   3  28   6  139.39   26.20
  -3  28  -6  137.29   26.50
   3 -28   6  124.49   36.20
   3  28   7  -15.40   27.00
  -3  28  -7   10.20   25.00
   3 -28   7    8.00   36.40
   3  29  -8   26.10   26.90
   3 -29  -8   -1.30   30.20
   3  29  -7   43.60   25.50
  -3 -29   7   -9.10   31.30
   3 -29  -7    3.00   27.60
   3  29  -6   16.70   22.70
   3 -29  -6  -10.90   26.40
  -3 -29   6    7.90   31.50
   3  29  -5   30.70   21.10
  -3  29   5   49.50   17.70
  -3 -29   5    2.20   32.20
   3 -29  -5   17.40   25.70
  -3  29   4  576.44   46.60
   3  29  -4  576.14   49.10
   3 -29  -4  545.05   51.59
  -3 -29   4  523.65   54.09
  -3  29   3   21.20   16.80
   3  29  -3    9.50   20.00
  -3 -29   3  -44.80   25.40
   3 -29  -3   46.40   24.30
   3  29  -2   73.59   20.30
  -3  29   2   73.99   18.10
   3 -29  -2   87.19   24.50
  -3 -29   2    7.50   21.40
  -3  29   1  349.96   36.50
   3  29  -1  388.86   37.30
   3 -29  -1  380.96   41.80
  -3 -29   1  395.86   36.20
   3  29   0   -5.70   17.70
  -3  29   0  -15.30   18.10
  -3 -29   0   29.90   15.70
   3 -29   0  -17.30   26.00
  -3  29  -1   45.90   19.60
   3  29   1   31.90   18.50
   3 -29   1   31.20   28.30
  -3 -29  -1   74.99   15.40
   3  29   2  101.59   20.80
  -3  29  -2  106.99   21.10
   3 -29   2   49.90   29.80
   3  29   3   69.39   21.80
  -3  29  -3   47.00   22.10
   3 -29   3   44.70   31.00
  -3  29  -4   20.40   22.40
   3  29   4   33.20   22.30
   3 -29   4   28.50   31.70
  -3  29  -5  139.39   27.40
   3  29   5  138.09   26.90
   3 -29   5  121.29   35.10
  -3  29  -6   15.00   25.30
   3  29   6  -19.80   24.80
   3 -29   6  -13.90   41.40
   3  30  -7  428.36   46.20
  -3 -30   7  409.56   51.39
   3  30  -6   59.89   24.50
  -3 -30   6   48.20   34.60
   3 -30  -6   55.19   27.60
   3  30  -5  429.26   41.90
  -3  30   5  455.95   39.30
  -3 -30   5  351.16   49.40
   3 -30  -5  408.66   45.00
  -3  30   4  260.97   28.60
   3  30  -4  219.28   28.10
  -3 -30   4  166.88   32.80
   3 -30  -4  236.78   31.00
  -3  30   3   28.00   18.50
   3  30  -3   17.80   21.70
   3 -30  -3   40.20   25.20
   3  30  -2  223.08   26.70
  -3  30   2  237.18   24.90
  -3 -30   2  160.68   26.80
   3 -30  -2  250.47   30.10
  -3  30   1  428.06   41.20
   3  30  -1  448.86   41.00
   3 -30  -1  445.36   46.00
  -3 -30   1  455.85   39.60
  -3  30   0    4.70   18.60
   3  30   0   56.99   19.40
   3 -30   0  -13.90   27.60
  -3 -30   0  103.99   19.80
   3  30   1  419.46   40.60
  -3  30  -1  413.96   38.40
   3 -30   1  344.37   47.20
  -3  30  -2   18.40   20.80
   3  30   2   63.79   21.50
   3 -30   2  -34.80   30.20
  -3  30  -3  356.16   39.10
   3  30   3  336.97   40.30
   3 -30   3  403.56   51.29
   3  30   4   52.99   24.80
  -3  30  -4   38.90   24.10
   3 -30   4   27.80   35.50
  -3  30  -5  -26.20   25.40
   3  30   5  -23.50   26.90
   3 -30   5  -45.00   40.30
  -3  30  -6   33.00   26.00
   3  30   6   -2.90   29.00
   3 -30   6   -3.90   37.30
   3  31  -7   53.99   28.60
  -3 -31   7   23.60   43.20
   3 -31  -7   26.70   29.70
   3  31  -6   39.30   24.70
   3 -31  -6   48.60   27.70
  -3 -31   6  -19.10   43.80
   3  31  -5  349.17   38.50
  -3  31   5  362.06   38.10
  -3 -31   5  284.97   42.00
   3 -31  -5  335.57   41.50
   3  31  -4  205.08   27.10
  -3 -31   4  104.69   35.50
   3 -31  -4  213.08   29.90
   3  31  -3    7.10   22.00
  -3  31   3   15.30   18.20
   3 -31  -3   40.40   25.80
   3  31  -2   21.30   20.60
  -3  31   2   12.30   19.00
   3 -31  -2   35.20   25.40
  -3 -31   2  -55.09   20.70
   3  31  -1  221.08   27.80
  -3  31   1  202.68   25.60
   3 -31  -1  244.18   31.30
   3  31   0   18.40   21.50
  -3  31   0    1.80   20.20
   3 -31   0  -13.00   27.10
  -3  31  -1   16.20   20.30
   3  31   1   41.60   19.90
   3 -31   1  -16.80   29.50
  -3  31  -2  103.19   22.80
   3  31   2  110.09   23.20
   3 -31   2   28.40   34.30
   3  31   3   65.39   23.00
  -3  31  -3   52.89   22.90
   3 -31   3  -48.50   32.20
   3  31   4   33.60   23.90
  -3  31  -4    8.60   24.10
   3 -31   4  -37.50   36.00
  -3  31  -5  -26.50   25.70
   3  31   5  -32.30   27.70
   3 -31   5  -90.49   34.40
   3 -31   6  -64.19   48.30
   3  32  -6  455.75   46.00
  -3 -32   6  383.26   51.19
   3 -32  -6  408.26   49.10
   3  32  -5  136.39   26.50
   3 -32  -5  156.78   29.10
  -3 -32   5   47.60   40.60
   3  32  -4   39.00   24.70
  -3  32   4   33.00   20.50
   3 -32  -4   64.29   26.40
   3  32  -3   51.59   23.70
  -3  32   3   54.69   20.50
   3 -32  -3   72.69   26.80
   3  32  -2   15.20   21.70
  -3  32   2   19.20   20.50
   3 -32  -2   73.99   26.20
   3  32  -1   40.30   22.80
  -3  32   1   21.30   21.20
   3 -32  -1   68.19   27.50
  -3  32   0  262.97   29.40
   3  32   0  301.07   34.40
   3 -32   0  269.77   35.70
   3  32   1  339.47   33.80
  -3  32  -1  238.28   29.60
   3 -32   1  212.38   36.70
   3  32   2  271.17   30.50
  -3  32  -2  246.18   30.00
   3 -32   2  194.88   39.20
   3  32   3   80.59   24.00
  -3  32  -3   47.00   24.30
   3 -32   3   11.90   38.30
  -3  32  -4  -12.60   24.70
   3  32   4   -2.00   24.30
   3 -32   4  -70.39   38.20
  -3  32  -5  -14.30   26.40
   3  32   5  -11.10   28.30
   3 -32   5  -71.49   45.00
  -3 -33   6  -78.59   41.40
   3  33  -5  379.86   42.10
  -3 -33   5  308.47   47.20
   3 -33  -5  362.76   43.70
  -3  33   4   32.10   21.10
   3  33  -4   15.10   24.90
   3 -33  -4   69.39   27.10
  -3  33   3   29.20   21.10
   3  33  -3   14.40   23.50
   3 -33  -3   79.89   26.60
   3  33  -2   -6.10   23.10
  -3  33   2   22.40   21.10
   3 -33  -2   84.99   27.20
   3  33  -1  113.09   24.90
  -3  33   1  125.99   23.20
   3 -33  -1  157.88   29.30
  -3  33   0   97.99   23.70
   3  33   0  110.79   23.90
   3 -33   0   84.09   30.90
  -3  33  -1   57.19   22.30
   3  33   1   49.40   24.40
   3 -33   1  -26.50   31.70
   3  33   2   86.09   25.40
  -3  33  -2   68.39   23.80
   3 -33   2  -53.59   35.70
  -3  33  -3   89.09   25.50
   3  33   3  119.39   26.20
   3 -33   3   51.19   37.50
  -3  33  -4    5.40   26.10
   3  33   4   21.70   26.70
   3 -33   4 -118.09   38.80
   3  34  -5   26.10   27.30
   3 -34  -5   53.69   29.30
   3  34  -4   29.40   25.60
  -3  34   4   22.60   22.80
   3 -34  -4   63.59   28.30
  -3  34   3   58.19   22.70
   3  34  -3   22.90   25.30
   3 -34  -3   75.29   27.50
   3  34  -2   39.80   24.40
  -3  34   2   20.60   22.20
   3 -34  -2   61.19   27.80
   3  34  -1  145.39   26.40
  -3  34   1  149.39   26.20
   3 -34  -1  190.88   31.70
   3  34   0  381.46   44.70
  -3  34   0  390.16   41.40
   3 -34   0  362.26   48.10
   3  34   1   30.60   23.20
  -3  34  -1    5.00   23.60
   3 -34   1  -86.99   33.00
  -3  34  -2  338.17   40.80
   3  34   2  475.45   42.00
   3 -34   2  289.27   48.80
  -3  34  -3   76.49   26.70
   3  34   3  115.09   27.70
   3 -34   3    8.20   41.60
  -3  35   4   64.49   25.00
   3  35  -4   28.30   26.70
   3 -35  -4   98.99   30.00
  -3  35   3   75.29   24.90
   3  35  -3   77.69   28.50
   3 -35  -3  119.49   29.60
   3  35  -2   40.60   26.00
  -3  35   2   31.50   23.50
   3 -35  -2   85.29   29.20
  -3  35   1  146.59   27.00
   3  35  -1  160.98   28.70
   3 -35  -1  216.18   33.70
  -3  35   0   98.39   25.60
   3  35   0   95.69   27.70
  -3  35  -1   15.70   24.80
   3  35   1   39.40   26.60
   3 -35   1  -43.60   34.50
   3  35   2   44.00   27.50
  -3  35  -2   26.70   26.00
   3 -35   2  -85.79   37.00
   3  36  -2  116.89   29.50
  -3  36   2  170.08   28.20
   3 -36  -2  197.78   32.90
  -3  36   1  126.39   28.10
   3  36  -1  114.59   28.90
   3 -36  -1  227.38   34.40
  -3  36   0  105.49   26.40
   3  36   0  113.49   28.10
   3 -36   0  126.49   34.30
   3  36   1  138.29   30.90
  -3  36  -1  134.89   27.10
   3 -36   1  110.19   36.50
   4   0 -13   -2.80   30.90
   4   0 -12   21.20   26.70
   4   0 -11   48.50   23.50
   4   0 -10   15.00   10.30
   4   0 -10   24.90   20.30
   4   0  -9   13.70    8.90
   4   0  -9   24.20   17.70
   4   0  -8 1014.80   70.69
   4   0  -8  875.41   77.69
   4   0  -7   10.60    7.00
   4   0  -7    1.50   12.60
   4   0  -6  812.22   58.69
   4   0  -6  781.22   60.99
   4   0  -5    8.70   10.10
   4   0  -4 1712.03  125.19
   4   0  -3    2.20    7.70
   4   0  -2 2222.78  161.68
   4   0  -1   -3.80    8.90
   4   0  -1    2.60    8.30
  -4   0   1   -3.10    8.50
  -4   0   1   -0.10    8.50
  -4   0   0   59.69    7.50
  -4   0  -1   -5.30    5.90
   4   0   1    4.60    7.40
   4   0   2   73.39   10.20
  -4   0  -2   73.79    8.70
  -4   0  -3    1.40    7.40
   4   0   3  -18.70    9.40
  -4   0  -4 1282.87   94.09
  -4   0  -5   38.80   11.00
  -4   0  -6 1099.79   83.09
  -4   0  -6 1117.99   81.79
  -4   0  -7   -2.30   10.20
  -4   0  -8    7.50   15.50
  -4   0  -8    2.50   14.40
  -4   0  -9  -14.30   17.80
  -4   0  -9   -4.00   13.30
  -4   0 -10  209.08   26.60
  -4   0 -10  212.48   23.00
  -4   0 -11   44.30   24.40
   4   1 -13   40.70   31.90
   4  -1 -13   52.09   30.50
   4   1 -12   93.49   27.10
   4  -1 -12   58.79   28.10
   4   1 -11  878.21   72.09
   4  -1 -11  877.81   71.99
   4   1 -10  345.27   28.20
   4   1 -10  326.57   36.20
   4  -1 -10  347.07   27.90
   4  -1 -10  292.47   39.60
   4   1  -9  670.23   51.09
   4   1  -9  684.73   55.19
   4  -1  -9  658.03   56.29
   4  -1  -9  699.83   50.79
   4   1  -8  154.38   27.20
   4   1  -8  168.68   16.20
   4  -1  -8  149.99   15.10
   4   1  -7  242.48   25.10
   4   1  -7  236.58   20.50
   4  -1  -7  263.87   19.90
   4  -1  -7  227.28   26.50
   4   1  -6   10.70   11.40
   4   1  -6    5.60    6.70
   4  -1  -6   12.70   11.80
   4   1  -5 1344.57   98.29
   4   1  -5 1357.76   99.39
   4  -1  -5 1344.67   99.29
   4   1  -4 1652.13  119.69
   4   1  -4 1628.04  119.39
   4  -1  -4 1628.44  119.69
   4   1  -3 3155.38  232.68
   4  -1  -3 3252.67  232.88
   4   1  -2  394.26   29.20
   4   1  -2  388.46   29.70
   4  -1  -2  385.26   30.30
  -4   1   1  361.76   27.40
   4   1  -1  345.97   27.30
   4  -1  -1  380.46   28.60
  -4   1   0 1749.32  123.09
   4  -1   0 1575.24  123.49
  -4  -1   0 1751.82  123.09
   4   1   1   83.49    9.80
  -4   1  -1   84.99    9.00
   4  -1   1   81.39   10.30
  -4  -1  -1   78.79    8.90
   4   1   2   13.60    8.10
  -4   1  -2   12.80    6.80
   4  -1   2   22.00    9.00
  -4  -1  -2   15.60    6.30
  -4   1  -3 1176.78   85.69
   4  -1   3 1141.69   86.39
  -4  -1  -3 1191.08   85.69
  -4   1  -4  404.06   30.90
  -4  -1  -4  381.36   31.80
  -4  -1  -4  393.76   31.20
  -4   1  -5 4972.90  354.96
  -4  -1  -5 4747.02  355.26
  -4  -1  -5 4963.10  354.96
  -4   1  -6  250.47   22.10
  -4   1  -6  239.28   24.50
  -4  -1  -6  227.88   24.70
  -4  -1  -6  247.18   21.90
  -4   1  -7    1.10   16.70
  -4   1  -7    1.10   10.30
  -4  -1  -7   33.60   10.10
  -4  -1  -7   -7.50   15.60
  -4   1  -8   72.39   12.70
  -4   1  -8   66.89   16.90
  -4  -1  -8   55.19   17.40
  -4   1  -9   37.70   14.50
  -4   1  -9   75.59   19.40
  -4  -1  -9   54.49   18.40
  -4  -1  -9   28.90   14.40
  -4   1 -10  165.98   20.90
  -4   1 -10  144.49   25.00
  -4  -1 -10  176.58   25.60
  -4  -1 -10  168.48   25.40
  -4   1 -11  537.45   46.00
  -4  -1 -11  490.45   51.69
  -4  -1 -11  520.35   45.80
   4   2 -13  -38.70   31.40
   4  -2 -13   10.00   30.90
   4   2 -12  133.49   31.20
   4  -2 -12  127.89   29.00
   4   2 -11   28.20   12.10
   4   2 -11   30.60   24.60
   4  -2 -11   33.50   22.70
   4   2 -10  103.69   13.40
   4   2 -10  125.29   22.50
   4  -2 -10  126.09   22.30
   4  -2 -10   80.49   11.80
   4   2  -9   32.80   10.20
   4   2  -9   17.30   17.50
   4  -2  -9   26.80   17.80
   4  -2  -9   32.30    8.40
   4   2  -8  605.34   54.99
   4   2  -8  618.04   47.00
   4  -2  -8  638.14   46.30
   4   2  -7  248.28   20.80
   4   2  -7  242.78   26.30
   4  -2  -7  250.07   25.80
   4   2  -6  331.87   28.80
   4   2  -6  335.47   26.10
   4  -2  -6  324.07   29.90
   4   2  -5 1260.07   92.99
   4   2  -5 1305.27   93.89
   4  -2  -5 1250.57   93.79
   4   2  -4  740.53   51.69
   4   2  -4  677.93   52.29
   4  -2  -4  668.23   52.39
   4   2  -3 1534.25  112.49
   4   2  -3 1553.14  112.19
   4  -2  -3 1536.95  112.69
   4   2  -2 2119.39  154.98
   4  -2  -2 2145.89  155.38
   4   2  -1  662.63   49.90
  -4   2   1  684.43   49.80
   4  -2  -1  679.63   50.99
  -4   2   0  107.09   11.50
   4  -2   0  144.89   15.20
  -4   2  -1  289.57   22.80
  -4  -2  -1  284.47   22.90
   4  -2   1  296.47   24.40
  -4   2  -2 1112.49   82.79
   4   2   2 1173.78   83.19
   4  -2   2 1118.59   83.59
  -4  -2  -2 1119.59   82.89
  -4   2  -3  143.59   14.40
   4  -2   3  131.69   16.80
  -4  -2  -3  131.39   14.20
  -4   2  -4    9.30    7.80
  -4  -2  -4   -0.70    8.80
  -4  -2  -4   -4.70    7.90
  -4   2  -5   11.30    9.00
  -4  -2  -5    9.20   10.00
  -4  -2  -5    3.20    8.80
  -4   2  -6  714.93   52.69
  -4  -2  -6  698.13   52.79
  -4  -2  -6  680.43   53.69
  -4   2  -7   79.49   13.20
  -4  -2  -7   88.69   15.50
  -4  -2  -7   90.09   12.30
  -4   2  -8   -3.60   16.50
  -4   2  -8    1.00   12.30
  -4  -2  -8   -4.50   12.60
  -4  -2  -8   -8.50   15.30
  -4   2  -9  120.59   17.30
  -4   2  -9  124.09   21.30
  -4  -2  -9  131.29   20.90
  -4  -2  -9  112.09   16.40
  -4   2 -10  201.08   23.00
  -4  -2 -10  217.38   26.90
  -4  -2 -10  199.78   22.30
  -4   2 -11   21.60   18.30
  -4  -2 -11   18.20   17.40
  -4  -2 -11   14.40   24.20
   4   3 -13  126.19   33.50
   4  -3 -13  100.39   34.10
   4   3 -12  361.56   44.60
   4  -3 -12  336.37   44.10
   4   3 -11  408.26   43.50
   4   3 -11  392.56   33.60
   4  -3 -11  392.26   44.90
   4   3 -10  739.83   55.59
   4   3 -10  758.62   60.59
   4  -3 -10  679.73   62.09
   4   3  -9   66.59   11.30
   4   3  -9   69.19   18.20
   4  -3  -9   50.79    8.20
   4  -3  -9   49.50   18.20
   4   3  -8  593.14   42.70
   4   3  -8  537.55   50.49
   4  -3  -8  510.75   54.69
   4   3  -7  831.82   60.19
   4   3  -7  832.82   62.19
   4  -3  -7  770.92   62.19
   4   3  -6  480.05   38.60
   4   3  -6  488.15   36.90
   4  -3  -6  481.35   39.20
   4   3  -5  105.19   12.10
   4   3  -5  117.69   15.60
   4  -3  -5  115.59   14.30
   4   3  -4 3557.44  257.27
   4   3  -4 3558.64  257.47
   4  -3  -4 3523.25  257.67
   4   3  -3  348.37   26.40
   4   3  -3  342.07   27.00
   4  -3  -3  340.77   27.80
   4   3  -2 2576.74  191.18
   4  -3  -2 2691.83  191.68
  -4   3   1   78.09    9.60
   4   3  -1   89.29   10.00
   4  -3  -1  103.89   12.00
   4   3   0 2446.86  177.38
  -4   3   0 2588.14  177.38
   4  -3   0 2295.87  177.88
  -4   3  -1 4066.59  290.67
  -4  -3  -1 4066.99  290.67
   4  -3   1 3893.91  291.07
  -4   3  -2   50.39    7.70
   4  -3   2   47.60   10.40
  -4  -3  -2   38.30    7.80
  -4   3  -3 1368.46  100.09
   4  -3   3 1354.46  100.79
  -4  -3  -3 1384.16  100.09
  -4   3  -4 1771.02  127.09
  -4  -3  -4 1783.72  127.09
  -4  -3  -4 1699.03  127.29
   4  -3   4 1715.83  127.79
  -4   3  -5  225.18   20.00
  -4  -3  -5  206.88   21.60
  -4  -3  -5  215.48   19.60
  -4   3  -6  515.65   39.90
  -4  -3  -6  525.15   39.90
  -4  -3  -6  499.35   41.50
  -4   3  -7   41.80   10.90
  -4  -3  -7   24.80   10.30
  -4  -3  -7   30.20   13.70
  -4   3  -8  207.28   22.10
  -4  -3  -8  216.98   21.50
  -4  -3  -8  205.18   27.30
  -4   3  -9  449.36   38.30
  -4  -3  -9  416.46   42.10
  -4  -3  -9  456.85   37.20
  -4   3 -10  342.77   34.20
  -4  -3 -10  348.67   38.00
  -4  -3 -10  337.77   33.00
  -4   3 -11  141.69   23.00
  -4  -3 -11  156.78   21.50
  -4  -3 -11  160.98   27.60
   4   4 -13   65.99   31.00
   4  -4 -13   96.59   33.00
   4   4 -12  371.96   45.10
   4  -4 -12  380.26   45.40
   4   4 -11   39.50   24.30
   4   4 -11   50.49   13.70
   4  -4 -11   62.89   23.80
   4   4 -10  307.57   34.50
   4   4 -10  279.37   27.00
   4  -4 -10  300.07   34.90
   4   4  -9   21.50   10.90
   4   4  -9   41.90   17.90
   4  -4  -9   43.00   18.50
   4   4  -8  151.68   23.20
   4   4  -8  148.69   16.60
   4  -4  -8  139.89   21.20
   4   4  -7   34.20   13.30
   4   4  -7   22.40    9.20
   4  -4  -7   47.70   14.10
   4   4  -6   97.59   11.10
   4   4  -6   91.89   13.50
   4  -4  -6   89.39   14.30
   4   4  -5  119.39   16.00
   4   4  -5   84.79   11.90
   4  -4  -5  112.19   14.30
   4   4  -4  708.13   55.09
   4   4  -4  766.52   54.49
   4  -4  -4  721.93   55.09
   4   4  -3  270.07   22.60
   4   4  -3  304.47   22.30
   4  -4  -3  264.07   23.90
   4   4  -2 1102.29   81.79
   4  -4  -2 1141.99   82.59
  -4   4   1   98.09   10.70
   4   4  -1  113.79   11.30
   4  -4  -1  137.49   15.50
   4   4   0 1564.94  111.29
  -4   4   0 1584.54  111.29
   4  -4   0 1438.16  111.99
  -4   4  -1   25.00    6.90
   4  -4   1   40.40    9.90
  -4   4  -2 3905.11  287.27
   4  -4   2 3968.70  287.77
  -4  -4  -2 4007.80  287.27
  -4   4  -3  318.37   25.40
  -4  -4  -3  295.27   25.20
   4  -4   3  321.97   27.50
  -4  -4  -3  327.07   25.50
  -4   4  -4  285.17   23.90
  -4  -4  -4  281.67   24.50
   4  -4   4  301.47   26.40
  -4  -4  -4  277.97   24.00
  -4   4  -5   39.60    9.50
  -4  -4  -5   39.40    9.00
  -4  -4  -5   41.60   10.90
  -4   4  -6  511.35   40.00
  -4  -4  -6  527.85   40.10
  -4  -4  -6  506.55   41.40
  -4   4  -7   53.99   13.80
  -4  -4  -7   44.90   14.00
  -4  -4  -7   50.59   11.00
  -4   4  -8    4.50   12.20
  -4  -4  -8  -12.30   15.70
  -4  -4  -8   -4.20   11.20
  -4   4  -9  113.09   16.50
  -4  -4  -9  107.39   20.70
  -4  -4  -9  117.59   15.80
  -4   4 -10  109.19   19.20
  -4  -4 -10  137.79   23.90
  -4  -4 -10  129.29   21.60
  -4   4 -11   39.40   19.40
  -4  -4 -11   29.00   25.30
   4   5 -12  149.79   31.50
   4  -5 -12  144.09   31.20
   4   5 -11   -1.40   23.70
   4   5 -11   20.80   13.30
   4  -5 -11   -0.80   23.00
   4   5 -10  195.28   20.50
   4   5 -10  143.99   25.00
   4  -5 -10  137.99   24.90
   4   5  -9  499.85   43.80
   4   5  -9  494.25   39.60
   4  -5  -9  508.75   44.50
   4   5  -8   18.70   19.00
   4   5  -8   19.10    9.80
   4  -5  -8   15.70   16.50
   4   5  -7 2995.00  213.08
   4   5  -7 2952.30  213.88
   4  -5  -7 2848.22  214.18
   4   5  -6   93.59   11.80
   4   5  -6  112.99   13.90
   4  -5  -6   89.09   14.70
   4   5  -5 2121.09  151.08
   4   5  -5 2016.90  150.68
   4  -5  -5 2068.89  151.28
   4   5  -4  180.78   15.80
   4   5  -4  124.89   15.20
   4  -5  -4  116.69   14.50
   4   5  -3    7.40    6.50
   4   5  -3    3.30    6.90
   4  -5  -3  -13.20    9.30
   4   5  -2 1956.60  146.69
   4  -5  -2 2083.89  147.39
   4   5  -1 2253.67  166.18
  -4   5   1 2277.17  166.08
   4  -5  -1 2337.17  166.88
  -4   5   0   12.60    5.80
   4   5   0   19.40    6.00
   4  -5   0   27.00   10.20
   4   5   1 5895.01  427.76
  -4   5  -1 6003.30  427.76
   4  -5   1 5809.52  428.26
  -4   5  -2    8.50    6.40
   4  -5   2   26.60   10.20
  -4   5  -3    7.30    7.10
  -4  -5  -3    5.30    7.50
  -4  -5  -3   13.00    7.70
   4  -5   3   28.90   11.00
  -4   5  -4  110.19   12.40
  -4  -5  -4  110.79   15.40
   4  -5   4  129.19   15.00
  -4   5  -5  252.87   22.20
  -4  -5  -5  229.78   21.10
   4  -5   5  245.88   26.00
  -4  -5  -5  243.18   23.00
  -4   5  -6    7.30    9.80
  -4  -5  -6    5.00   11.50
  -4  -5  -6   16.60    9.20
  -4  -5  -7  479.05   40.70
  -4  -5  -7  488.25   38.30
  -4   5  -8   -3.60   13.10
  -4  -5  -8   -1.70   15.60
  -4  -5  -8   -2.80   10.80
  -4   5  -9 1171.38   86.89
  -4  -5  -9 1123.59   89.49
  -4  -5  -9 1184.58   86.59
  -4   5 -10   -3.40   16.60
  -4  -5 -10  -15.30   20.80
  -4  -5 -10  -21.90   15.00
  -4   5 -11   11.10   18.50
  -4  -5 -11    4.50   25.30
  -4  -5 -11   -3.80   19.10
   4   6 -12  192.18   33.30
   4  -6 -12  193.48   33.70
   4   6 -11  129.69   17.80
   4   6 -11  154.28   26.50
   4  -6 -11  114.59   27.20
   4   6 -10  118.69   25.10
   4   6 -10  112.39   15.30
   4  -6 -10  102.09   23.10
   4   6  -9  200.78   23.60
   4   6  -9  177.38   21.20
   4  -6  -9  186.28   24.60
   4   6  -8  398.76   31.80
   4  -6  -8  383.26   37.40
   4   6  -7  277.47   24.90
   4   6  -7  310.57   27.50
   4  -6  -7  283.17   29.70
   4   6  -6  138.69   18.10
   4   6  -6  140.49   14.60
   4  -6  -6  153.68   19.90
   4   6  -5  285.07   26.20
   4   6  -5  317.97   26.60
   4  -6  -5  321.57   28.40
   4   6  -4  309.27   25.60
   4   6  -4  369.06   26.30
   4  -6  -4  259.17   27.50
   4   6  -3  330.17   25.30
   4   6  -3  331.27   25.00
   4  -6  -3  263.47   26.70
   4   6  -2 1461.05  107.99
   4  -6  -2 1505.05  108.79
  -4   6   1 1045.20   76.49
   4   6  -1 1038.40   76.59
   4  -6  -1 1059.59   77.79
  -4   6   0  439.66   33.40
   4   6   0  464.45   33.60
   4  -6   0  426.16   35.70
  -4   6  -1  110.39   12.50
   4   6   1  113.99   12.40
   4  -6   1  165.68   17.60
  -4   6  -2 1216.28   88.79
   4   6   2 1202.08   88.69
   4  -6   2 1224.08   89.79
  -4   6  -3  256.87   22.30
  -4  -6  -3  274.67   22.40
   4  -6   3  275.17   25.30
  -4   6  -4   -3.00    8.10
  -4  -6  -4   -5.70    8.50
  -4  -6  -4   -2.90    7.90
   4  -6   4   -8.40   11.80
  -4   6  -5  240.68   22.80
  -4  -6  -5  259.97   23.80
  -4  -6  -5  253.07   22.70
   4  -6   5  284.07   26.30
  -4   6  -6  954.90   73.09
  -4  -6  -6 1019.60   72.99
  -4  -6  -6  989.10   73.89
   4  -6   6  972.10   75.39
  -4   6  -7   14.20   11.20
  -4  -6  -7   18.40    9.90
  -4  -6  -7    7.90   13.60
  -4   6  -8   36.30   13.60
  -4  -6  -8   38.10   11.50
  -4  -6  -8   26.30   16.20
  -4   6  -9   23.00   14.10
  -4  -6  -9   43.60   12.80
  -4  -6  -9   31.70   18.80
  -4   6 -10  132.29   20.00
  -4  -6 -10  124.19   23.90
  -4  -6 -10  129.09   17.80
  -4   6 -11   79.69   20.90
  -4  -6 -11   88.79   19.90
  -4  -6 -11   86.79   27.10
   4   7 -12   13.80   15.80
   4   7 -12   36.60   27.90
   4  -7 -12    4.60   30.30
   4   7 -11   -0.50   24.10
   4   7 -11   12.50   13.70
   4  -7 -11    5.90   25.20
   4   7 -10   42.10   21.80
   4   7 -10   61.39   13.90
   4  -7 -10   84.69   23.20
   4   7  -9   38.80   18.00
   4   7  -9   47.10   12.90
   4  -7  -9   42.90   19.30
   4   7  -8  634.14   47.90
   4  -7  -8  605.34   51.09
   4   7  -7 3245.88  234.88
   4   7  -7 3232.98  235.68
   4  -7  -7 3216.68  235.88
   4   7  -6  689.03   53.19
   4   7  -6  673.63   52.19
   4  -7  -6  710.83   53.89
   4   7  -5  280.47   25.40
   4   7  -5  298.27   25.40
   4  -7  -5  286.77   27.60
   4   7  -4  146.49   15.60
   4  -7  -4  141.89   16.10
   4   7  -3  320.97   23.40
   4   7  -3  275.07   23.00
   4  -7  -3  261.57   25.30
   4   7  -2   21.80    6.40
   4  -7  -2  -25.30   10.10
   4   7  -1 1440.26  105.99
  -4   7   1 1441.06  105.79
   4  -7  -1 1483.75  106.99
   4   7   0 2853.61  203.38
  -4   7   0 2835.82  203.28
   4  -7   0 2715.33  203.98
   4   7   1 1699.33  120.59
  -4   7  -1 1641.94  120.59
   4  -7   1 1628.94  121.49
  -4   7  -2  683.13   51.49
   4   7   2  686.43   51.29
   4  -7   2  710.93   52.99
  -4   7  -3  478.85   38.50
  -4  -7  -3  518.55   38.50
   4  -7   3  520.35   40.50
  -4   7  -4  568.04   43.90
  -4  -7  -4  569.54   43.90
   4  -7   4  596.24   45.80
  -4   7  -5  178.08   18.60
   4  -7   5  201.08   23.20
  -4  -7  -5  178.68   20.20
  -4  -7  -5  190.78   18.50
  -4   7  -6  422.06   33.10
   4  -7   6  376.96   43.30
  -4  -7  -6  405.36   34.90
  -4  -7  -6  414.66   32.80
  -4   7  -7 1063.09   78.79
  -4  -7  -7 1037.10   78.49
  -4  -7  -7 1076.59   79.89
  -4   7  -8  766.12   59.09
  -4  -7  -8  759.82   57.89
  -4  -7  -8  762.52   60.59
  -4   7  -9  320.77   30.50
  -4  -7  -9  315.27   35.50
  -4  -7  -9  324.07   29.20
  -4   7 -10  184.28   22.20
  -4  -7 -10  197.08   21.20
  -4  -7 -10  238.18   27.40
  -4   7 -11   10.00   17.30
   4  -7  11   -5.70   27.60
  -4  -7 -11  -11.00   24.40
   4   8 -12   43.60   35.50
   4   8 -12   31.10   17.10
   4  -8 -12   20.00   30.50
   4   8 -11   89.09   19.90
   4   8 -11  155.58   26.90
   4  -8 -11  110.79   26.80
   4   8 -10    8.20   19.80
   4   8 -10    9.40   13.60
   4  -8 -10   16.70   21.20
   4   8  -9  157.78   21.10
   4   8  -9  146.89   17.20
   4  -8  -9  144.19   23.30
   4   8  -8  593.64   46.00
   4  -8  -8  592.54   50.39
   4   8  -7   19.20   13.50
   4   8  -7   27.80   11.50
   4  -8  -7   30.70   15.40
   4   8  -6  482.35   38.40
   4   8  -6  474.15   37.50
   4  -8  -6  457.05   39.30
   4   8  -5  338.97   28.80
   4   8  -5  343.07   29.60
   4  -8  -5  369.06   30.70
   4   8  -4  173.28   16.70
   4   8  -4  140.89   15.50
   4  -8  -4  122.19   16.10
   4   8  -3   81.29    9.30
   4   8  -3   40.70    7.80
   4  -8  -3    6.50   11.80
   4   8  -2 1626.44  121.69
   4  -8  -2 1716.93  122.69
  -4   8   1  711.93   53.59
   4   8  -1  715.63   53.89
   4  -8  -1  761.92   55.79
   4   8   0   13.50    6.40
  -4   8   0    4.20    5.90
   4  -8   0   31.70   11.30
   4   8   1   34.50    7.00
  -4   8  -1   28.10    7.10
   4  -8   1   50.99   12.00
  -4   8  -2  212.88   18.90
   4   8   2  206.88   18.40
   4  -8   2  240.68   23.50
  -4   8  -3  269.77   22.90
   4   8   3  258.47   22.20
   4  -8   3  281.67   27.20
  -4  -8  -3  287.77   22.70
  -4   8  -4  164.68   16.50
   4  -8   4  170.28   20.80
  -4  -8  -4  142.49   16.90
  -4   8  -5  148.29   17.20
   4  -8   5  183.58   23.40
  -4  -8  -5  152.18   18.80
  -4   8  -6  646.64   49.60
  -4  -8  -6  662.83   50.59
   4  -8   6  635.44   53.39
  -4   8  -7   49.60   12.90
  -4  -8  -7   45.70   14.70
   4  -8   7   56.59   17.40
  -4   8  -8   50.39   14.20
  -4  -8  -8   57.59   16.70
   4  -8   8   60.99   19.40
  -4   8  -9   94.49   16.90
  -4  -8  -9   94.19   20.70
   4  -8   9   73.29   22.80
  -4   8 -10  112.09   20.10
   4  -8  10  119.69   26.60
  -4  -8 -10  137.29   24.00
  -4   8 -11   46.40   19.40
   4  -8  11   34.90   27.00
  -4  -8 -11   41.20   24.90
   4   9 -12  125.99   29.70
   4   9 -12  120.49   18.80
   4  -9 -12   81.99   32.30
   4   9 -11  208.68   29.00
   4   9 -11  194.98   22.20
   4  -9 -11  159.98   29.90
   4   9 -10  100.49   15.90
   4   9 -10  100.09   21.40
   4  -9 -10   69.39   24.30
   4   9  -9  354.66   33.20
   4   9  -9  411.56   39.00
   4  -9  -9  404.66   40.40
   4   9  -8  404.66   46.50
   4   9  -8  482.65   37.80
   4  -9  -8  483.45   41.80
   4   9  -7  360.96   30.50
   4   9  -7  353.96   31.90
   4  -9  -7  360.66   33.70
   4   9  -6 2527.35  186.38
   4   9  -6 2502.65  185.98
   4  -9  -6 2635.04  187.08
   4   9  -5  387.66   32.90
   4   9  -5  396.36   32.90
   4  -9  -5  433.16   34.70
   4   9  -4    9.30    8.60
   4   9  -4   33.20   10.70
   4  -9  -4   -7.10   12.30
   4   9  -3 2513.45  182.28
   4   9  -3 2503.95  182.58
   4  -9  -3 2510.35  183.08
  -4   9   2  897.61   64.09
   4   9  -2  869.21   64.49
   4  -9  -2  860.91   66.49
  -4   9   1   -2.60    5.70
   4   9  -1    7.70    6.40
   4  -9  -1   48.90   12.90
   4   9   0 2623.74  188.48
  -4   9   0 2608.84  188.38
   4  -9   0 2551.44  189.28
  -4   9  -1   -5.70    7.00
   4   9   1    8.50    6.50
   4  -9   1   20.90   11.70
   4   9   2 2311.67  166.68
  -4   9  -2 2275.27  166.78
   4  -9   2 2294.87  167.68
  -4   9  -3   84.49   10.70
   4   9   3  100.69   10.20
   4  -9   3   78.59   14.20
  -4  -9  -3   95.49   12.30
  -4   9  -4  252.87   22.30
   4   9   4  241.38   21.20
   4  -9   4  274.87   27.40
  -4  -9  -4  260.57   22.60
  -4   9  -5 1626.54  119.49
   4   9   5 1586.74  119.09
  -4  -9  -5 1657.43  119.69
   4  -9   5 1658.13  120.79
   4  -9   6  484.95   42.50
  -4  -9  -6  476.75   39.50
  -4   9  -7   81.79   13.80
   4  -9   7   74.99   18.90
  -4  -9  -7   81.79   15.90
  -4   9  -8 1382.96  105.09
  -4  -9  -8 1455.05  106.39
   4  -9   8 1419.66  108.19
  -4   9  -9    5.30   15.10
   4  -9   9   27.20   22.00
  -4  -9  -9   14.30   19.10
  -4   9 -10  121.49   20.30
  -4  -9 -10  148.39   24.50
   4  -9  10  108.39   27.10
  -4   9 -11  127.59   23.40
   4  -9  11   85.19   29.30
  -4  -9 -11  123.19   27.50
   4  10 -12   61.59   31.10
   4  10 -12   57.99   18.80
   4 -10 -12   48.00   31.40
   4  10 -11   99.99   24.90
   4  10 -11   95.19   18.00
   4 -10 -11   84.59   26.60
   4  10 -10   11.00   20.00
   4  10 -10   25.20   18.10
   4 -10 -10  -15.80   23.70
   4  10  -9   97.49   21.10
   4  10  -9   99.39   15.50
   4 -10  -9   85.39   22.20
   4  10  -8  220.98   26.10
   4  10  -8  230.08   23.90
   4 -10  -8  203.08   28.60
   4  10  -7  262.47   26.90
   4  10  -7  282.77   25.20
   4 -10  -7  278.57   29.50
   4  10  -6  124.59   14.90
   4  10  -6  113.29   14.90
   4 -10  -6  122.79   18.10
   4  10  -5 2559.44  188.28
   4  10  -5 2586.44  188.28
   4 -10  -5 2608.04  189.08
   4  10  -4  235.08   21.40
   4  10  -4  273.07   23.00
   4 -10  -4  209.18   25.30
   4  10  -3 1316.07   95.99
   4  10  -3 1363.66   96.39
   4 -10  -3 1259.17   97.29
  -4  10   2 1137.99   82.29
   4  10  -2 1155.98   82.89
   4 -10  -2 1089.19   84.09
  -4  10   1  784.92   59.89
   4  10  -1  810.92   60.19
   4 -10  -1  856.91   62.29
   4  10   0  140.39   12.50
  -4  10   0  107.19   13.20
   4  10   1   36.40    7.50
  -4  10  -1   32.00    7.90
   4 -10   1   60.09   13.20
  -4  10  -2  489.95   38.20
   4  10   2  495.65   37.90
   4 -10   2  523.65   41.30
   4  10   3  343.57   27.50
  -4  10  -3  332.47   27.80
  -4 -10  -3  352.36   27.30
   4 -10   3  355.16   31.00
  -4  10  -4   -3.40    9.10
   4  10   4   -6.10    7.20
  -4 -10  -4   -2.20    8.80
   4 -10   4    3.50   13.30
   4  10   5   72.99   10.20
  -4  10  -5   57.79   11.80
   4 -10   5   92.49   16.60
  -4 -10  -5   87.39   12.60
   4  10   6  139.49   14.20
  -4  10  -6  152.58   16.30
   4 -10   6  131.89   20.00
  -4 -10  -6  142.19   17.00
  -4  10  -7  176.48   19.50
   4  10   7  163.18   19.40
  -4 -10  -7  199.38   25.00
   4 -10   7  210.58   23.60
  -4  10  -8   22.60   13.60
   4  10   8   43.10   11.70
  -4 -10  -8   25.20   17.00
   4 -10   8   19.10   20.10
  -4  10  -9  219.88   23.20
   4  10   9  232.28   24.10
   4 -10   9  205.58   28.80
  -4 -10  -9  223.48   26.60
   4  10  10  160.88   18.60
  -4  10 -10  115.89   20.00
  -4 -10 -10  123.79   24.80
   4 -10  10  115.59   27.40
   4  11 -12    9.20   30.90
   4  11 -12    9.00   18.00
   4 -11 -12    7.80   29.90
   4  11 -11  823.02   67.19
   4  11 -11  893.11   75.09
   4 -11 -11  901.61   73.49
   4  11 -10  234.68   27.00
   4  11 -10  215.28   23.00
   4 -11 -10  198.08   30.30
   4  11  -9  552.94   48.50
   4  11  -9  530.85   44.20
   4 -11  -9  549.15   48.70
   4  11  -8   61.89   17.40
   4  11  -8   55.59   14.10
   4 -11  -8   59.19   20.30
   4  11  -7  343.87   31.40
   4  11  -7  340.57   30.20
   4 -11  -7  310.07   34.90
   4  11  -6  470.05   37.80
   4  11  -6  428.76   37.20
   4 -11  -6  483.35   40.40
   4  11  -5 1003.50   75.19
   4  11  -5  983.60   75.69
   4 -11  -5 1050.09   76.49
   4  11  -4 1300.07   98.19
   4  11  -4 1335.87   97.69
   4 -11  -4 1358.46   98.89
   4  11  -3 3183.58  233.28
   4  11  -3 3203.18  232.88
   4 -11  -3 3241.28  233.88
   4  11  -2  139.29   13.30
  -4  11   2   80.89    8.80
   4 -11  -2   41.20   14.80
  -4  11   1 1676.03  122.89
   4  11  -1 1643.64  123.19
   4 -11  -1 1753.02  124.59
  -4  11   0   11.60    7.00
   4  11   0   24.30    7.30
   4  11   1  127.19   13.80
  -4  11  -1  112.29   12.50
   4 -11   1  183.38   20.00
   4  11   2 1319.87   95.39
  -4  11  -2 1301.87   95.59
   4 -11   2 1290.97   96.89
   4  11   3 2710.33  196.58
  -4  11  -3 2636.94  196.68
   4 -11   3 2697.63  197.78
  -4 -11  -3 2772.72  196.48
   4  11   4  451.95   35.30
  -4  11  -4  432.06   35.60
  -4 -11  -4  474.25   36.10
   4 -11   4  490.75   39.30
  -4  11  -5  916.81   69.79
   4  11   5  908.61   69.09
   4 -11   5  953.00   71.79
  -4 -11  -5  960.10   69.99
   4  11   6   -7.50    8.90
  -4  11  -6  -10.10   11.00
  -4 -11  -6   -6.50   12.50
   4 -11   6   -8.00   16.30
  -4  11  -7  231.78   25.00
   4  11   7  246.48   23.40
   4 -11   7  258.07   31.20
  -4 -11  -7  264.47   27.70
  -4  11  -8  292.17   29.20
   4  11   8  300.67   29.70
  -4 -11  -8  315.77   32.90
   4 -11   8  313.17   37.10
  -4  11  -9  116.99   18.60
   4 -11   9  129.09   26.30
  -4 -11  -9  141.09   22.90
   4  11  10   22.20   20.20
  -4  11 -10    8.00   17.60
   4 -11  10    2.20   26.40
  -4 -11 -10   -6.40   22.30
   4  12 -12  177.48   33.80
   4  12 -12  161.48   22.50
   4 -12 -12  150.98   34.10
   4  12 -11   94.39   19.60
   4  12 -11  108.59   33.40
   4 -12 -11   74.79   28.10
   4  12 -10   98.79   21.80
   4  12 -10   86.89   17.80
   4 -12 -10   63.89   25.70
   4  12  -9  208.28   24.50
   4  12  -9  183.68   21.80
   4 -12  -9  193.18   26.90
   4  12  -8   -8.10   14.20
   4  12  -8   -2.20   15.10
   4 -12  -8   -0.80   19.30
   4  12  -7   33.60   14.70
   4  12  -7   41.60   13.60
   4  12  -6    3.00   12.40
   4  12  -6    1.10   11.90
   4 -12  -6   -2.70   15.50
   4  12  -5  530.15   41.80
   4  12  -5  527.15   42.40
   4 -12  -5  555.24   44.10
   4  12  -4  202.08   21.10
   4  12  -4  197.48   19.00
   4 -12  -4  176.98   23.20
   4  12  -3   77.39   11.40
  -4  12   3   49.40    7.60
   4  12  -3   48.60    9.10
  -4  12   2  193.98   16.70
   4  12  -2  238.78   19.20
   4 -12  -2  154.28   20.60
   4  12  -1 1432.76  106.69
  -4  12   1 1445.26  106.39
   4 -12  -1 1503.65  108.29
   4  12   0  475.55   36.70
  -4  12   0  442.96   36.40
   4 -12   0  543.75   40.10
  -4  12  -1  188.08   18.90
   4  12   1  214.48   18.90
   4 -12   1  262.77   24.50
  -4  12  -2  621.54   47.70
   4  12   2  642.64   47.30
   4 -12   2  634.04   50.69
   4  12   3  587.64   43.40
  -4  12  -3  576.64   43.90
  -4 -12  -3  568.84   43.30
   4 -12   3  569.44   46.50
   4  12   4  131.69   15.30
  -4  12  -4  145.29   16.80
  -4 -12  -4  133.69   16.10
  -4  12  -5   94.29   13.90
   4  12   5   97.89   11.50
  -4 -12  -5   89.49   13.10
   4 -12   5   79.79   25.50
   4  12   6   24.10    9.60
  -4  12  -6   25.90   12.20
   4 -12   6   32.20   17.00
  -4 -12  -6   29.10   12.80
  -4  12  -7  117.89   16.90
   4  12   7  127.19   14.70
  -4 -12  -7  127.99   18.60
   4 -12   7  135.69   21.60
  -4  12  -8    7.50   14.20
   4  12   8    1.90   13.40
   4 -12   8   -4.40   20.40
  -4 -12  -8   -6.80   17.30
   4  12   9  158.28   21.30
  -4  12  -9  144.39   20.20
   4 -12   9  164.38   27.50
  -4 -12  -9  152.88   24.10
  -4  12 -10  102.79   21.20
   4 -12  10  117.19   28.40
  -4 -12 -10  139.79   25.50
   4  13 -12  326.77   37.00
   4  13 -12  293.97   42.60
   4 -13 -12  329.47   41.00
   4  13 -11  303.97   37.40
   4  13 -11  352.06   35.40
   4 -13 -11  306.07   38.40
   4  13 -10 1072.49   81.39
   4  13 -10 1027.40   78.99
   4 -13 -10  987.20   84.19
   4  13  -9  172.78   20.30
   4  13  -9  145.59   22.00
   4 -13  -9  138.19   25.90
   4  13  -8   53.59   16.50
   4  13  -8   51.79   17.70
   4 -13  -8   53.39   20.30
   4  13  -7  106.69   16.50
   4  13  -7  104.89   16.10
   4 -13  -7   91.89   21.30
   4  13  -6  415.66   36.60
   4  13  -6  443.96   36.50
   4 -13  -6  456.35   39.00
   4  13  -5   15.90   10.70
   4  13  -5   18.60   12.40
   4 -13  -5   27.20   15.60
   4  13  -4 1018.50   77.49
   4  13  -4 1035.90   76.79
   4 -13  -4 1062.89   78.49
  -4  13   3 1166.08   82.89
   4  13  -3 1152.48   84.09
   4 -13  -3 1081.99   85.09
  -4  13   2 4047.80  287.87
   4  13  -2 3890.81  288.27
   4 -13  -2 3971.80  289.07
   4  13  -1  730.03   54.79
  -4  13   1  694.33   54.19
   4 -13  -1  783.52   57.49
  -4  13   0   59.19    9.00
   4  13   0   64.09    9.20
  -4  13  -1   41.10    9.20
   4  13   1   51.19    8.80
   4 -13   1   78.99   15.50
  -4  13  -2  567.84   43.40
   4  13   2  572.24   43.00
   4 -13   2  567.14   46.00
  -4  13  -3  957.70   71.09
   4  13   3  982.70   70.69
  -4 -13  -3  953.90   70.39
   4 -13   3  929.21   72.79
  -4  13  -4 2434.46  178.18
   4  13   4 2435.86  177.78
  -4 -13  -4 2500.05  177.88
   4 -13   4 2402.36  179.18
  -4  13  -5   95.09   16.80
   4  13   5  103.19   12.10
   4 -13   5  107.69   19.30
  -4 -13  -5  103.99   14.20
   4  13   6  227.08   21.20
  -4  13  -6  220.38   23.10
   4 -13   6  210.78   29.20
  -4 -13  -6  222.28   24.60
  -4  13  -7   65.29   14.80
   4  13   7   73.09   11.90
   4 -13   7   64.89   20.40
  -4 -13  -7   70.99   16.60
  -4  13  -8    9.40   15.10
   4  13   8   -2.20   11.30
  -4 -13  -8  -15.50   17.90
   4 -13   8    2.20   20.20
   4  13   9    7.30   12.90
  -4  13  -9    3.40   16.20
  -4 -13  -9  -13.30   20.30
   4 -13   9   -2.20   24.20
  -4  13 -10  116.99   20.50
   4 -13  10  105.19   29.60
  -4 -13 -10  133.89   26.10
   4  14 -12   98.89   34.40
   4  14 -12  120.09   22.80
   4 -14 -12   95.59   33.20
   4  14 -11   68.39   25.80
   4  14 -11   75.79   19.20
   4 -14 -11   55.59   30.30
   4  14 -10   56.09   17.70
   4  14 -10   86.29   21.60
   4 -14 -10   36.00   26.70
   4  14  -9  512.85   47.30
   4  14  -9  521.65   44.50
   4 -14  -9  532.55   48.90
   4  14  -8   20.80   16.00
   4  14  -8   29.80   15.90
   4 -14  -8   30.10   20.40
   4  14  -7   53.99   15.00
   4  14  -7   59.49   15.30
   4 -14  -7   73.99   20.00
   4  14  -6   57.29   13.30
   4  14  -6   59.59   14.70
   4 -14  -6   39.50   17.90
   4  14  -5   50.19   14.10
   4  14  -5   63.79   12.30
   4 -14  -5   65.69   16.90
   4  14  -4   13.80   12.20
   4  14  -4    9.60    9.70
   4 -14  -4   -2.20   15.00
  -4  14   3  630.54   45.60
   4  14  -3  616.14   47.60
   4 -14  -3  584.14   49.80
  -4  14   2   27.00    7.60
   4  14  -2   75.99   10.30
   4 -14  -2   -0.90   14.80
  -4  14   1 2769.52  197.88
   4  14  -1 2643.34  198.18
   4 -14  -1 2762.32  199.38
   4  14   0  293.97   25.00
  -4  14   0  283.47   25.20
   4 -14   0  348.47   30.20
  -4  14  -1  551.84   42.30
   4  14   1  543.55   42.10
   4 -14   1  572.84   45.50
  -4  14  -2   45.60   10.50
   4  14   2   60.79    9.40
   4 -14   2   63.19   15.90
   4  14   3  335.77   26.90
  -4  14  -3  340.97   28.10
  -4 -14  -3  322.77   26.80
   4 -14   3  334.57   32.90
   4  14   4   21.20    8.60
  -4  14  -4   35.30   11.40
   4 -14   4   12.60   15.50
  -4 -14  -4   10.40    9.80
   4  14   5  206.48   19.20
  -4  14  -5  185.58   21.30
   4 -14   5  199.88   23.20
  -4 -14  -5  177.28   21.40
   4  14   6  112.89   13.40
  -4  14  -6  122.69   16.70
   4 -14   6  102.19   22.00
  -4 -14  -6  120.79   16.40
  -4  14  -7   30.10   14.50
   4  14   7   17.20   10.90
   4 -14   7   34.20   20.10
  -4 -14  -7   29.20   16.10
  -4  14  -8   45.70   16.10
  -4 -14  -8   22.20   18.40
   4 -14   8   27.90   22.00
   4  14   9   63.19   18.50
  -4  14  -9   70.69   17.90
  -4 -14  -9   59.39   22.00
   4 -14   9   53.59   25.40
  -4  14 -10    8.70   18.40
  -4 -14 -10    3.60   23.70
   4 -14  10   23.90   28.40
   4  15 -11   93.69   28.00
   4  15 -11  117.49   21.80
   4 -15 -11  115.59   30.90
   4  15 -10  797.42   63.19
   4  15 -10  811.72   65.09
   4 -15 -10  736.03   68.89
   4  15  -9   49.10   18.10
   4  15  -9   89.29   22.20
   4 -15  -9   12.70   24.20
   4  15  -8   24.10   16.10
   4  15  -8   28.40   18.60
   4 -15  -8   10.60   21.10
   4  15  -7  510.15   42.40
   4 -15  -7  487.95   45.60
   4  15  -6  149.19   18.90
   4  15  -6  156.68   21.00
   4 -15  -6  152.98   22.10
   4  15  -5  128.49   14.80
   4  15  -5   77.89   15.90
   4 -15  -5  115.99   18.90
   4  15  -4 1017.60   78.19
  -4  15   4 1047.00   76.39
   4 -15  -4 1072.19   79.69
  -4  15   3   41.40    8.00
   4  15  -3   47.40   12.30
  -4 -15   3   50.39   10.90
   4 -15  -3   18.60   16.00
   4  15  -2 2451.65  181.28
  -4  15   2 2565.24  180.78
   4 -15  -2 2445.66  182.18
  -4  15   1  420.56   33.80
   4  15  -1  435.26   34.40
   4 -15  -1  462.75   38.30
   4  15   0    0.40    8.50
  -4  15   0    5.80    8.60
   4 -15   0   49.30   16.30
   4  15   1  224.78   19.90
  -4  15  -1  215.28   20.20
   4 -15   1  219.28   26.30
  -4  15  -2  517.75   40.20
   4  15   2  515.05   39.60
   4 -15   2  518.95   43.50
   4  15   3  893.01   67.09
  -4  15  -3  898.11   67.59
   4 -15   3  874.81   69.79
  -4 -15  -3  939.81   66.79
   4  15   4 1183.68   87.69
  -4  15  -4 1197.58   88.39
  -4 -15  -4 1214.18   87.89
   4 -15   4 1164.18   90.69
   4  15   5   12.50    9.40
  -4  15  -5   18.90   12.70
  -4 -15  -5    5.90   12.00
   4 -15   5   13.40   17.10
   4  15   6  650.13   50.59
  -4  15  -6  653.03   52.09
  -4 -15  -6  678.53   52.59
   4 -15   6  674.93   55.69
  -4  15  -7  522.15   43.90
   4  15   7  548.45   43.50
   4 -15   7  491.05   49.00
  -4 -15  -7  563.54   45.40
  -4  15  -8   11.40   15.90
   4 -15   8   30.40   22.70
  -4 -15  -8   10.90   19.00
  -4  15  -9  168.58   22.60
   4 -15   9  171.98   29.50
  -4 -15  -9  196.18   26.50
  -4  15 -10  126.99   21.40
   4  15  10  128.49   23.40
  -4 -15 -10  114.79   26.80
   4 -15  10   89.99   31.80
   4  16 -11  117.29   30.70
   4 -16 -11  135.59   32.20
   4  16 -10   65.29   19.80
   4  16 -10   62.19   24.50
   4 -16 -10   64.29   27.40
   4  16  -9  570.44   46.70
   4  16  -9  560.04   50.79
   4 -16  -9  516.15   53.69
   4  16  -8  109.89   19.60
   4  16  -8  120.79   19.30
   4 -16  -8  112.29   24.70
   4  16  -7   -7.10   15.30
   4  16  -7   20.10   15.00
   4 -16  -7    2.60   20.00
   4  16  -6  171.08   22.10
   4  16  -6  160.78   19.70
   4 -16  -6  161.78   25.60
   4  16  -5  604.84   49.60
   4 -16  -5  649.83   51.39
   4  16  -4   13.40   13.20
  -4  16   4   26.60    7.30
   4 -16  -4   18.10   16.30
  -4  16   3    8.80    7.90
   4  16  -3   -2.50   11.80
  -4 -16   3    3.00   10.50
   4 -16  -3   42.30   16.50
   4  16  -2  244.68   21.90
  -4  16   2  231.38   19.40
  -4 -16   2  195.68   20.20
   4 -16  -2  178.98   25.50
   4  16  -1 1169.18   86.59
  -4  16   1 1196.98   86.19
   4 -16  -1 1151.98   88.49
  -4  16   0   -9.50    9.30
   4  16   0   15.00    9.40
   4 -16   0   23.70   16.00
   4  16   1  188.98   18.00
  -4  16  -1  176.88   18.70
   4 -16   1  184.28   22.40
   4  16   2  133.29   15.90
  -4  16  -2  156.88   15.70
   4 -16   2  136.09   19.90
  -4  16  -3  653.53   49.50
   4  16   3  633.74   48.80
  -4 -16  -3  634.04   48.30
   4 -16   3  651.43   53.49
   4  16   4  161.68   17.30
  -4  16  -4  152.08   19.00
   4 -16   4  121.39   33.70
  -4 -16  -4  135.29   18.00
   4  16   5  269.07   24.40
  -4  16  -5  277.87   26.70
  -4 -16  -5  273.17   26.10
   4 -16   5  265.67   31.80
   4  16   6  144.59   16.70
  -4  16  -6  125.89   18.40
  -4 -16  -6  122.59   17.70
   4 -16   6  131.59   23.60
  -4  16  -7  185.68   21.30
   4  16   7  179.28   20.60
  -4 -16  -7  199.58   22.30
   4 -16   7  161.78   26.40
  -4  16  -8   43.30   17.10
  -4 -16  -8   20.30   19.40
   4 -16   8   20.40   25.20
   4  16   9  136.89   22.90
  -4  16  -9  114.49   20.90
   4 -16   9  106.39   31.70
  -4 -16  -9  158.38   25.70
  -4  16 -10    6.40   19.90
   4 -16  10    4.20   29.90
  -4 -16 -10    1.30   25.00
   4  17 -11  272.57   38.70
   4  17 -11  259.97   29.00
   4 -17 -11  241.58   37.40
   4  17 -10   44.20   20.40
   4  17 -10   39.70   24.80
   4 -17 -10   43.30   27.80
   4  17  -9  140.39   22.60
   4  17  -9  149.29   23.50
   4 -17  -9  133.99   28.40
   4  17  -8   74.09   19.30
   4  17  -8  104.99   22.10
   4 -17  -8   90.59   24.50
   4  17  -7  659.63   51.39
   4  17  -7  604.04   50.59
   4 -17  -7  603.44   53.29
   4  17  -6 1232.18   93.09
   4 -17  -6 1246.88   98.49
   4  17  -5  363.66   33.60
   4 -17  -5  404.16   37.40
   4  17  -4  770.22   60.59
  -4  17   4  797.82   58.39
   4 -17  -4  785.22   61.99
  -4 -17   4  798.22   60.09
  -4  17   3  595.04   44.20
   4  17  -3  573.24   46.40
  -4 -17   3  617.34   45.50
   4 -17  -3  545.55   49.00
   4  17  -2  114.29   14.60
  -4  17   2  122.49   14.80
   4 -17  -2  134.19   19.50
  -4 -17   2  131.49   14.00
  -4  17   1 1270.77   90.39
   4  17  -1 1177.68   90.79
   4 -17  -1 1243.88   92.99
  -4  17   0  566.84   43.40
   4  17   0  547.15   43.60
   4 -17   0  597.34   48.40
  -4  17  -1  427.06   34.50
   4  17   1  433.66   34.10
   4 -17   1  426.16   40.10
   4  17   2  160.78   17.60
  -4  17  -2  175.78   19.40
   4 -17   2  168.08   22.00
   4  17   3 1250.97   93.29
  -4  17  -3 1277.77   93.79
  -4 -17  -3 1295.87   92.89
   4 -17   3 1234.88   95.79
   4  17   4  208.38   20.50
  -4  17  -4  181.88   22.60
  -4 -17  -4  215.88   21.00
   4 -17   4  184.78   24.60
  -4  17  -5  166.18   19.50
   4  17   5  175.58   19.20
  -4 -17  -5  156.78   21.40
   4 -17   5  156.78   23.90
   4  17   6   65.69   12.40
  -4  17  -6   76.09   16.70
  -4 -17  -6   50.99   15.80
   4 -17   6   75.79   21.40
  -4  17  -7  851.61   66.59
   4  17   7  834.72   64.79
   4 -17   7  854.41   70.59
  -4 -17  -7  896.11   67.29
   4  17   8  538.75   48.00
  -4  17  -8  613.74   49.80
  -4 -17  -8  652.23   51.99
   4 -17   8  599.74   55.69
   4  17   9  135.29   23.20
  -4  17  -9  145.49   22.00
   4 -17   9  124.39   30.60
  -4 -17  -9  155.08   26.20
   4 -17  10   -1.10   30.50
   4  18 -11   74.49   23.40
   4  18 -11   58.99   32.70
   4 -18 -11   69.49   32.30
   4  18 -10   44.60   20.40
   4  18 -10    6.10   26.30
   4 -18 -10   11.90   29.20
   4  18  -9  220.88   27.20
   4  18  -9  243.58   32.90
   4 -18  -9  239.18   32.30
   4  18  -8   41.70   18.90
   4  18  -8   -5.80   18.90
   4 -18  -8   11.90   22.90
   4  18  -7   87.29   19.30
   4 -18  -7  111.99   23.50
   4  18  -6   41.10   16.80
   4 -18  -6   32.30   19.80
  -4  18   5 1511.55  109.39
  -4 -18   5 1495.15  111.39
   4 -18  -5 1496.65  112.69
   4  18  -4   14.00   14.30
  -4  18   4   26.60    9.00
  -4 -18   4   42.70   13.00
   4 -18  -4    3.10   17.70
  -4  18   3  220.28   19.80
   4  18  -3  197.58   23.40
  -4 -18   3  203.38   21.70
   4 -18  -3  187.48   26.10
  -4  18   2   35.20    9.60
   4  18  -2   39.30   13.10
   4 -18  -2    1.30   16.50
  -4 -18   2   17.80   11.20
   4  18  -1  229.28   24.10
  -4  18   1  283.87   22.60
   4 -18  -1  241.08   29.00
  -4  18   0   59.99   12.30
   4  18   0   27.10   10.80
   4 -18   0   49.10   18.90
   4  18   1    5.60    9.70
  -4  18  -1   -1.70   10.90
   4 -18   1   -8.30   16.80
  -4  18  -2    2.90   12.00
   4  18   2    5.40   10.00
   4 -18   2   -3.80   17.60
  -4  18  -3  670.03   55.59
   4  18   3  665.73   50.59
   4 -18   3  588.94   57.49
  -4 -18  -3  695.63   50.19
   4  18   4   16.60   10.80
  -4  18  -4    1.30   13.60
  -4 -18  -4   -2.20   11.10
   4 -18   4   -4.10   18.40
  -4  18  -5  155.18   19.50
   4  18   5  172.28   19.50
   4 -18   5  161.48   24.70
  -4 -18  -5  153.08   18.00
  -4  18  -6    7.80   16.10
   4  18   6   12.90   11.80
   4 -18   6   19.80   21.50
  -4 -18  -6   13.80   15.50
  -4  18  -7  283.47   30.80
   4 -18   7  298.57   37.90
  -4 -18  -7  283.17   31.90
  -4  18  -8   32.10   18.30
   4  18   8   22.80   18.50
   4 -18   8   16.90   27.40
  -4 -18  -8   25.80   20.40
  -4  18  -9  176.98   24.40
   4  18   9  160.58   22.60
   4 -18   9  167.48   33.10
  -4 -18  -9  181.48   27.70
   4  19 -11   27.50   22.10
   4 -19 -11  -28.00   30.70
   4  19 -10   18.30   22.00
   4 -19 -10    1.00   29.50
   4  19  -9   65.99   20.50
   4 -19  -9   60.39   28.00
   4  19  -8  923.81   74.59
   4 -19  -8  968.40   76.99
   4  19  -7   13.80   18.30
   4 -19  -7    3.80   22.70
   4  19  -6 2462.95  179.68
   4 -19  -6 2436.66  180.88
   4  19  -5   15.50   15.40
  -4  19   5   14.10    8.80
  -4 -19   5    0.60   14.90
   4 -19  -5    7.90   22.40
  -4  19   4    5.70    9.10
   4 -19  -4   -8.70   18.50
  -4 -19   4    1.40   13.40
   4  19  -3  113.19   17.10
  -4  19   3  114.89   13.30
   4 -19  -3  109.19   20.20
  -4 -19   3  122.49   15.30
  -4  19   2  520.95   38.50
   4  19  -2  490.95   39.80
   4 -19  -2  454.35   43.10
  -4 -19   2  481.65   39.30
  -4  19   1   11.80   10.30
   4  19  -1   15.30   12.30
   4 -19  -1   -7.90   17.90
  -4  19   0 1867.81  131.79
   4  19   0 1738.53  131.79
   4 -19   0 1791.32  133.89
   4  19   1  321.97   28.10
  -4  19  -1  325.97   28.10
   4 -19   1  303.07   33.80
   4  19   2 1571.14  116.09
  -4  19  -2 1612.34  116.59
   4 -19   2 1565.34  118.79
  -4  19  -3   27.60   13.40
   4  19   3   39.80   10.80
  -4 -19  -3   29.50   10.90
   4 -19   3   26.70   21.60
   4  19   4   15.30   11.60
  -4  19  -4   12.60   14.80
  -4 -19  -4   49.40   12.20
   4 -19   4   15.70   19.80
  -4  19  -5  166.58   20.20
   4  19   5  195.28   21.50
   4 -19   5  174.88   27.10
  -4 -19  -5  186.18   23.10
  -4  19  -6  121.39   19.50
   4  19   6  124.49   15.90
  -4 -19  -6  121.69   18.80
   4 -19   6  117.19   24.80
  -4  19  -7   45.00   18.60
  -4 -19  -7   23.70   17.80
   4 -19   7   36.30   24.50
  -4  19  -8 1069.19   83.09
   4  19   8 1104.69   84.59
  -4 -19  -8 1077.09   84.29
   4 -19   8 1062.89   87.79
  -4  19  -9    8.50   20.80
   4  19   9   -0.70   21.70
   4 -19   9    0.70   31.80
  -4 -19  -9  -12.00   23.40
   4  20 -11   43.30   25.10
   4 -20 -11   25.70   33.40
   4  20 -10    1.50   22.50
   4 -20 -10   -3.00   31.00
   4  20  -9  154.08   25.10
   4 -20  -9  161.28   31.40
   4  20  -8   64.79   20.40
   4 -20  -8   55.59   25.40
   4  20  -7   47.20   18.70
   4 -20  -7   66.69   23.60
   4  20  -6  124.99   20.30
   4 -20  -6  114.69   24.10
  -4 -20   6  143.69   21.40
   4  20  -5  424.56   39.20
  -4  20   5  458.55   35.30
  -4 -20   5  465.85   39.40
   4 -20  -5  435.96   47.30
  -4  20   4   20.40   10.30
   4  20  -4   28.80   15.60
   4 -20  -4   53.19   19.40
  -4 -20   4   31.90   14.60
  -4  20   3   16.40   10.40
  -4 -20   3   11.20   13.60
   4 -20  -3  -29.80   18.10
   4  20  -2   -6.00   13.90
  -4  20   2   -1.90   10.80
  -4 -20   2   -6.50   12.80
   4 -20  -2   -4.00   18.30
  -4  20   1  640.54   48.10
   4  20  -1  625.54   48.70
   4 -20  -1  596.44   51.49
   4  20   0   48.80   12.90
  -4  20   0   51.79   12.40
   4 -20   0   39.70   19.50
  -4  20  -1  174.18   18.70
   4  20   1  174.68   17.60
   4 -20   1  168.28   24.00
  -4  20  -2   31.30   14.30
   4  20   2   42.30   12.20
   4 -20   2   39.30   21.50
  -4  20  -3  667.43   53.19
   4  20   3  671.23   52.39
   4 -20   3  660.83   57.49
  -4 -20  -3  700.93   51.69
  -4  20  -4  175.48   20.30
   4  20   4  167.08   17.80
  -4 -20  -4  149.88   20.80
   4 -20   4  164.48   25.20
   4  20   5  281.97   27.00
  -4  20  -5  271.97   29.60
  -4 -20  -5  275.37   28.30
   4 -20   5  276.97   35.50
   4  20   6  122.49   19.10
  -4  20  -6  143.19   21.60
   4 -20   6  137.09   26.30
  -4 -20  -6  171.28   20.40
  -4  20  -7  158.88   23.80
   4  20   7  173.48   22.20
   4 -20   7  179.68   29.80
  -4 -20  -7  194.08   23.00
  -4  20  -8   44.40   20.30
   4  20   8    6.00   20.70
  -4 -20  -8   -9.00   21.00
   4 -20   8    7.30   29.20
  -4  20  -9   85.39   22.90
   4 -20   9   84.49   33.50
  -4 -20  -9   65.59   25.30
   4  21 -10   39.40   22.60
   4 -21 -10   15.30   31.10
   4  21  -9  116.89   24.50
   4 -21  -9  117.59   30.00
   4  21  -8  854.71   71.69
  -4 -21   8  978.70   74.19
   4 -21  -8  881.61   74.19
   4  21  -7  611.24   50.99
   4 -21  -7  558.84   53.79
  -4 -21   7  570.24   50.09
  -4  21   6  566.34   43.70
   4  21  -6  583.54   47.90
   4 -21  -6  545.75   51.19
  -4 -21   6  572.84   49.10
   4  21  -5  194.28   22.70
  -4  21   5  173.48   19.30
   4 -21  -5  175.78   26.00
  -4 -21   5  195.88   26.10
  -4  21   4  228.78   22.70
   4  21  -4  236.58   26.80
   4 -21  -4  263.77   29.40
  -4 -21   4  229.28   27.00
   4  21  -3  374.36   33.80
  -4  21   3  369.76   31.80
  -4 -21   3  395.06   33.90
   4 -21  -3  374.46   36.80
  -4  21   2   19.80   11.80
  -4 -21   2   14.90   14.00
   4 -21  -2   28.10   18.70
   4  21  -1  555.64   44.70
  -4  21   1  576.74   44.00
   4 -21  -1  550.64   47.40
  -4 -21   1  544.25   43.00
  -4  21   0 1473.15  106.79
   4  21   0 1438.46  106.89
   4 -21   0 1433.66  109.09
  -4  21  -1  199.98   23.00
   4  21   1  202.18   22.50
   4 -21   1  238.88   29.30
   4  21   2  405.46   33.00
  -4  21  -2  391.76   34.70
  -4 -21  -2  387.86   32.10
   4 -21   2  379.46   41.90
  -4  21  -3  709.03   55.59
   4  21   3  696.33   54.09
   4 -21   3  673.93   59.09
  -4 -21  -3  735.83   53.99
  -4  21  -4   81.09   17.80
   4  21   4  116.29   15.10
  -4 -21  -4  103.69   15.80
   4 -21   4  110.99   23.80
  -4  21  -5    4.40   17.30
   4  21   5   21.90   15.00
  -4 -21  -5   21.30   15.10
   4 -21   5   22.20   24.10
  -4  21  -6   68.59   19.60
   4  21   6   87.39   19.00
   4 -21   6   71.99   25.20
  -4 -21  -6   58.19   17.70
  -4  21  -7  346.67   35.10
   4  21   7  296.47   34.90
  -4 -21  -7  341.57   34.90
   4 -21   7  282.47   37.40
  -4  21  -8  353.06   38.50
   4  21   8  360.06   40.70
   4 -21   8  337.77   47.20
  -4 -21  -8  385.96   40.20
  -4  21  -9   77.39   23.20
   4 -21   9   60.69   34.60
  -4 -21  -9   89.59   26.10
   4  22 -10   57.09   24.40
   4 -22 -10   34.00   32.70
  -4 -22  10   44.70   31.10
   4  22  -9  255.57   31.10
   4 -22  -9  251.17   35.80
  -4 -22   9  280.37   40.30
   4  22  -8    4.60   21.20
  -4 -22   8   36.90   24.90
   4 -22  -8    6.40   26.90
   4  22  -7   35.70   20.00
   4 -22  -7   17.30   24.50
  -4 -22   7   19.70   21.30
  -4  22   6   27.60   11.10
   4  22  -6   20.80   18.60
  -4 -22   6   43.10   19.60
   4 -22  -6   14.00   22.80
   4  22  -5  214.18   24.10
  -4  22   5  209.08   21.90
  -4 -22   5  226.18   28.10
   4 -22  -5  203.28   27.70
   4  22  -4   -1.00   15.00
  -4  22   4   18.40   11.90
  -4 -22   4   47.60   16.30
   4 -22  -4    0.00   22.90
  -4  22   3  189.68   21.00
   4  22  -3  173.88   20.50
  -4 -22   3  192.78   21.20
   4 -22  -3  160.38   24.90
  -4  22   2   45.70   13.40
   4  22  -2   55.49   15.80
  -4 -22   2   51.89   15.60
   4 -22  -2   66.69   20.20
   4  22  -1 1098.19   89.59
  -4  22   1 1199.88   87.79
   4 -22  -1 1203.38   90.69
  -4 -22   1 1203.58   87.19
  -4  22   0   58.29   14.60
   4  22   0   86.29   21.30
   4 -22   0   66.09   21.50
  -4  22  -1  539.35   43.70
   4  22   1  526.55   43.00
   4  22   2   71.59   13.80
  -4  22  -2   48.30   15.80
   4 -22   2   47.90   22.50
  -4 -22  -2   36.80   14.50
  -4  22  -3  572.64   46.40
   4  22   3  573.34   45.60
   4 -22   3  520.15   50.39
  -4 -22  -3  572.84   44.30
  -4  22  -4   13.30   17.10
   4 -22   4    3.40   22.40
  -4 -22  -4    6.10   13.60
   4  22   5  197.78   23.70
  -4  22  -5  177.78   22.90
  -4 -22  -5  191.08   21.20
   4 -22   5  166.98   28.80
   4  22   6    4.40   18.00
  -4  22  -6    8.80   18.60
   4 -22   6   20.10   26.40
  -4 -22  -6  -21.30   16.40
   4  22   7   54.69   17.80
  -4  22  -7   77.39   22.10
   4 -22   7   84.89   28.10
  -4 -22  -7   39.20   19.20
   4  22   8   -3.70   22.60
  -4  22  -8   27.10   22.60
  -4 -22  -8   -5.00   22.10
   4 -22   8   48.60   30.10
   4  23 -10  246.98   32.20
   4 -23 -10  258.67   39.00
  -4 -23  10  251.37   36.80
   4  23  -9  386.66   42.30
  -4 -23   9  412.76   45.00
   4 -23  -9  361.96   49.60
   4  23  -8   40.20   23.30
  -4 -23   8   41.90   27.30
   4 -23  -8   16.90   27.40
   4  23  -7  415.46   40.50
  -4 -23   7  449.76   44.50
   4 -23  -7  370.66   45.50
   4  23  -6  -15.30   19.10
  -4  23   6   10.70   13.90
   4 -23  -6  -32.80   23.60
  -4 -23   6  -10.20   20.90
  -4  23   5  137.59   16.10
   4  23  -5  155.58   21.40
   4 -23  -5  127.19   24.90
  -4 -23   5  138.09   22.20
  -4  23   4   88.79   14.30
   4  23  -4   74.79   18.30
  -4 -23   4  117.99   19.60
   4 -23  -4   64.19   22.10
   4  23  -3  497.35   42.70
  -4  23   3  493.95   40.80
  -4 -23   3  549.74   43.10
   4 -23  -3  439.26   54.19
   4  23  -2  389.76   34.50
  -4  23   2  342.47   32.40
   4 -23  -2  341.57   44.20
  -4 -23   2  372.56   33.10
  -4  23   1  232.08   24.00
   4  23  -1  232.78   26.20
   4 -23  -1  230.08   30.70
  -4 -23   1  240.08   23.70
   4  23   0  104.09   16.80
  -4  23   0   69.19   16.30
  -4 -23   0  113.19   13.30
   4 -23   0   63.59   38.80
   4  23   1 1235.68   91.79
  -4  23  -1 1197.98   92.39
   4 -23   1 1259.37   95.19
  -4  23  -2   62.19   17.00
   4  23   2   88.19   17.90
  -4 -23  -2   74.79   12.90
   4 -23   2   61.09   24.40
  -4  23  -3   79.99   17.60
   4  23   3   72.69   16.90
  -4 -23  -3   72.39   14.20
   4 -23   3   64.39   24.80
  -4  23  -4  755.92   62.29
   4  23   4  827.02   61.49
   4 -23   4  722.33   67.49
  -4 -23  -4  818.42   60.69
   4  23   5  123.49   18.60
  -4  23  -5  124.19   21.60
  -4 -23  -5  130.49   18.70
   4 -23   5  136.69   29.60
  -4  23  -6  142.39   23.00
   4  23   6  114.29   19.30
   4 -23   6  118.69   29.20
  -4 -23  -6  102.69   19.90
   4  23   7  283.17   31.90
  -4  23  -7  295.27   34.60
  -4 -23  -7  272.17   32.30
   4 -23   7  252.77   38.80
   4  23   8   -9.00   21.70
  -4  23  -8   20.20   23.90
   4 -23   8   13.90   32.90
  -4 -24  10   73.29   32.70
   4  24  -9  232.08   31.40
  -4 -24   9  220.88   35.00
   4 -24  -9  250.27   35.90
   4  24  -8   31.20   23.30
   4 -24  -8    9.90   27.90
  -4 -24   8   15.60   25.50
   4  24  -7    0.80   21.30
  -4 -24   7    8.20   25.20
   4 -24  -7   11.00   26.60
   4  24  -6  -16.50   19.50
   4 -24  -6    3.50   24.40
  -4 -24   6   -6.80   21.30
  -4  24   5  366.46   33.70
   4  24  -5  444.46   38.10
  -4 -24   5  416.16   40.10
   4 -24  -5  371.06   40.70
   4  24  -4   89.79   18.90
  -4  24   4   75.79   14.70
   4 -24  -4   76.89   22.90
  -4 -24   4   99.69   20.90
  -4  24   3   -8.00   13.40
   4  24  -3   -3.60   16.50
   4 -24  -3    1.10   21.70
  -4 -24   3   -6.40   17.90
   4  24  -2  100.69   17.70
   4 -24  -2   61.89   21.60
  -4 -24   2   63.69   17.10
   4  24  -1  320.27   31.00
  -4  24   1  239.38   29.40
  -4 -24   1  346.77   28.20
   4 -24  -1  287.17   35.00
  -4  24   0    9.40   14.80
   4  24   0   23.60   15.30
  -4 -24   0   32.60   11.60
   4 -24   0   29.30   22.10
  -4  24  -1  118.29   18.60
   4  24   1  139.29   18.40
  -4 -24  -1  150.38   18.30
   4 -24   1  143.09   26.60
  -4  24  -2  108.29   19.50
   4  24   2  139.39   17.80
   4 -24   2  143.09   26.70
  -4 -24  -2  127.99   15.90
   4  24   3  309.37   29.90
  -4  24  -3  276.67   32.20
   4 -24   3  291.77   38.80
  -4 -24  -3  331.07   29.10
   4  24   4   58.59   16.80
  -4  24  -4   43.00   18.90
   4 -24   4   27.20   25.70
  -4 -24  -4   27.40   14.90
   4  24   5   64.29   19.00
  -4  24  -5   23.20   19.60
   4 -24   5   41.20   27.70
  -4 -24  -5   45.00   16.00
   4  24   6    5.40   16.90
  -4  24  -6    2.20   20.90
  -4 -24  -6  -10.00   18.90
   4 -24   6  -12.50   29.00
  -4  24  -7  104.19   24.60
   4  24   7  104.79   26.30
   4 -24   7   76.19   32.10
   4  24   8   -4.40   24.80
  -4  24  -8   -9.80   24.40
   4 -24   8  -25.40   34.10
   4  25  -9   17.20   25.00
   4 -25  -9   10.30   31.00
  -4 -25   9   24.50   39.40
   4  25  -8  105.09   26.80
   4 -25  -8  124.09   31.50
  -4 -25   8  165.28   33.50
   4  25  -7    8.30   21.60
   4 -25  -7  -11.60   26.30
  -4 -25   7    8.90   26.90
   4  25  -6   38.10   21.00
   4 -25  -6   14.10   25.20
  -4 -25   6   28.20   24.70
   4  25  -5   20.10   19.30
  -4  25   5   -2.60   13.70
   4 -25  -5    7.20   23.60
  -4 -25   5    8.10   21.80
   4  25  -4 1372.06   98.29
  -4  25   4 1090.19   96.29
   4 -25  -4 1303.17   99.39
  -4 -25   4 1465.45   99.19
   4  25  -3  141.69   20.30
  -4  25   3  104.89   16.90
  -4 -25   3  114.89   21.20
   4 -25  -3  143.59   24.30
   4  25  -2  315.67   30.50
  -4  25   2  278.57   29.00
  -4 -25   2  257.67   33.00
   4 -25  -2  336.37   36.20
   4  25  -1    7.00   16.80
  -4  25   1    0.50   15.10
  -4 -25   1    7.70   13.70
   4 -25  -1    1.20   22.30
   4  25   0   51.49   17.00
  -4  25   0   26.40   16.40
  -4 -25   0   79.59   13.30
   4 -25   0   47.40   23.90
  -4  25  -1  275.17   31.90
   4  25   1  284.77   32.70
  -4 -25  -1  318.97   27.50
   4 -25   1  295.97   39.70
   4  25   2  378.86   34.40
  -4  25  -2  367.96   36.70
   4 -25   2  367.26   41.90
  -4 -25  -2  369.76   32.10
   4  25   3  107.79   19.30
  -4  25  -3  103.89   20.20
   4 -25   3  129.99   29.10
  -4 -25  -3  104.79   16.60
  -4  25  -4  990.90   77.69
   4  25   4 1036.30   76.99
   4 -25   4  967.70   83.79
  -4  25  -5    7.90   20.30
   4  25   5    6.20   19.40
   4 -25   5   -7.40   30.60
   4  25   6  482.75   45.10
  -4  25  -6  423.26   43.80
   4 -25   6  443.56   51.59
   4  25   7  -16.80   19.80
  -4  25  -7  -11.50   23.10
   4 -25   7  -56.09   37.00
   4 -25   8  -24.20   41.90
   4  26  -9   89.79   28.20
   4 -26  -9   85.09   34.50
  -4 -26   9  108.49   41.10
   4  26  -8   56.39   25.10
  -4 -26   8   73.69   34.40
   4 -26  -8   70.09   30.20
   4  26  -7   42.20   22.90
   4 -26  -7  128.19   28.50
  -4 -26   7   50.99   29.80
   4  26  -6   48.50   22.10
   4 -26  -6   16.60   25.90
  -4  26   5  614.74   57.59
   4  26  -5  800.82   60.39
  -4 -26   5  857.51   63.39
   4 -26  -5  732.03   63.59
  -4  26   4   63.79   16.20
   4  26  -4   91.99   20.70
   4 -26  -4   86.89   24.30
  -4 -26   4   85.69   23.00
  -4  26   3   50.49   15.70
   4  26  -3   95.79   19.40
   4 -26  -3   71.29   23.70
  -4 -26   3   49.00   21.80
   4  26  -2  170.28   22.30
  -4  26   2  169.08   20.70
  -4 -26   2  177.98   22.20
   4 -26  -2  205.88   26.90
  -4  26   1  -21.70   20.30
   4  26  -1   16.90   17.30
  -4 -26   1   39.80   14.00
   4 -26  -1    6.70   22.70
  -4  26   0  -22.20   15.90
   4  26   0   27.70   17.50
   4 -26   0    0.00   23.90
  -4 -26   0   13.50   12.70
  -4  26  -1   -5.50   17.60
   4  26   1    0.40   18.00
  -4 -26  -1  -29.00   12.30
   4 -26   1  -10.70   26.00
  -4  26  -2    4.50   17.90
   4  26   2   19.00   17.10
   4 -26   2   34.20   26.80
   4  26   3  314.77   34.70
  -4  26  -3  315.67   33.70
   4 -26   3  323.77   44.10
  -4  26  -4   58.59   20.50
   4  26   4   60.39   19.30
   4 -26   4   36.10   28.90
   4  26   5   81.59   20.50
  -4  26  -5   80.39   23.00
   4 -26   5   57.99   31.10
  -4  26  -6   50.19   23.60
   4  26   6   41.80   20.10
   4 -26   6   25.80   34.20
  -4  26  -7   37.40   24.10
   4  26   7   23.80   25.60
   4 -26   7   35.50   35.70
  -4 -27   9  267.47   39.70
   4  27  -8   21.50   26.10
  -4 -27   8    9.60   35.30
   4 -27  -8  -20.00   29.80
   4  27  -7    5.80   23.60
   4 -27  -7   33.80   28.10
  -4 -27   7   15.70   30.90
   4  27  -6   74.59   23.20
   4 -27  -6   30.70   26.50
  -4 -27   6   83.39   26.80
  -4  27   5  266.17   32.60
   4  27  -5  392.26   36.50
  -4 -27   5  367.06   42.50
   4 -27  -5  351.86   41.30
   4  27  -4  311.97   33.80
  -4  27   4  245.78   30.50
   4 -27  -4  405.36   39.80
  -4 -27   4  311.97   39.40
   4  27  -3 1093.89   78.29
  -4  27   3  867.11   76.29
   4 -27  -3 1041.90   80.39
  -4 -27   3 1059.99   79.09
  -4  27   2   22.00   16.20
   4  27  -2   22.30   18.00
   4 -27  -2   38.20   23.00
   4  27  -1  108.49   21.10
  -4  27   1   81.29   19.30
  -4 -27   1  162.28   19.90
   4 -27  -1  112.79   25.60
  -4  27   0   -1.40   16.70
   4  27   0    1.50   18.50
   4 -27   0   -2.00   25.10
  -4 -27   0   22.80   13.30
   4  27   1  103.09   19.70
  -4  27  -1   57.29   19.30
   4 -27   1  104.39   27.40
   4  27   2   11.50   17.70
  -4  27  -2  -21.60   18.40
   4 -27   2   -3.90   27.90
   4  27   3  228.58   26.30
  -4  27  -3  220.68   26.10
   4 -27   3  198.68   33.80
  -4  27  -4  458.45   45.40
   4  27   4  448.66   42.30
   4 -27   4  500.35   55.89
   4  27   5  561.64   53.29
  -4  27  -5  513.25   49.20
   4 -27   5  556.24   62.29
   4  27   6   58.69   22.70
  -4  27  -6   46.20   24.90
   4 -27   6   21.30   33.30
  -4  27  -7    5.10   25.50
   4  27   7   -3.20   27.50
   4 -27   7   -9.20   39.40
   4  28  -8  141.89   29.80
  -4 -28   8  174.98   40.60
   4 -28  -8  124.89   32.20
   4  28  -7   43.40   24.70
  -4 -28   7   17.40   32.50
   4 -28  -7   26.10   28.70
   4  28  -6  324.47   36.20
   4 -28  -6  270.57   35.30
  -4 -28   6  268.97   37.20
  -4  28   5  252.07   32.00
   4  28  -5  349.87   36.10
   4 -28  -5  304.47   40.40
  -4 -28   5  336.67   42.10
  -4  28   4   26.00   16.80
   4  28  -4   -3.00   20.10
  -4 -28   4  -37.10   24.50
   4 -28  -4   25.60   25.40
   4  28  -3   42.00   19.80
  -4  28   3    1.50   16.20
  -4 -28   3  -54.39   21.20
   4 -28  -3   79.89   24.20
  -4  28   2   81.69   29.70
   4  28  -2  152.38   22.50
  -4 -28   2   78.79   19.90
   4 -28  -2  185.38   27.20
   4  28  -1  162.98   23.30
  -4  28   1  147.49   22.70
  -4 -28   1  223.68   23.60
   4 -28  -1  185.28   28.20
  -4  28   0  -10.90   17.30
   4  28   0   25.20   19.30
   4 -28   0    2.50   25.80
   4  28   1   71.19   19.70
  -4  28  -1   58.89   19.00
   4 -28   1  -16.60   26.70
  -4  28  -2   -9.40   19.30
   4  28   2   16.00   18.90
   4 -28   2  -34.90   27.80
   4  28   3  132.99   24.20
  -4  28  -3  146.19   24.00
   4 -28   3  154.08   35.20
  -4  28  -4   69.59   22.60
   4  28   4   49.30   22.40
   4 -28   4   85.39   31.70
  -4  28  -5  116.69   25.00
   4  28   5   90.69   24.50
   4 -28   5   74.49   33.70
   4  28   6  190.78   33.90
  -4  28  -6  155.18   29.00
   4 -28   6  160.78   43.60
   4  29  -8  298.67   36.60
   4 -29  -8  280.77   39.60
  -4 -29   8  326.87   45.30
   4  29  -7    2.40   25.20
  -4 -29   7    2.20   34.90
   4 -29  -7  -26.50   28.70
   4  29  -6  164.88   26.70
  -4 -29   6  137.39   38.10
   4 -29  -6  153.98   30.40
  -4  29   5   97.79   20.30
   4  29  -5  116.89   24.20
   4 -29  -5  126.69   28.30
  -4 -29   5  119.49   29.20
   4  29  -4  124.59   23.50
  -4  29   4  104.79   19.60
   4 -29  -4  172.58   27.70
  -4 -29   4   84.49   27.00
   4  29  -3  841.92   63.49
  -4  29   3  717.53   61.59
  -4 -29   3  721.23   63.39
   4 -29  -3  861.11   66.59
  -4  29   2  -18.80   17.60
   4  29  -2   19.00   20.30
   4 -29  -2   27.10   24.60
  -4 -29   2  -32.80   17.80
   4  29  -1   95.09   20.80
  -4  29   1   65.29   19.60
   4 -29  -1  117.09   27.10
  -4  29   0  467.15   44.70
   4  29   0  593.14   48.40
   4 -29   0  513.25   51.89
   4  29   1   -5.00   20.40
  -4  29  -1   -8.20   19.60
   4 -29   1  -38.90   28.10
  -4  29  -2  165.08   24.00
   4  29   2  164.78   25.00
   4 -29   2   97.09   32.70
   4  29   3  151.48   24.40
  -4  29  -3   94.09   23.90
   4 -29   3  119.99   32.50
   4  29   4   10.90   23.20
  -4  29  -4   -1.60   22.60
   4 -29   4  -31.40   33.60
   4  29   5  380.66   42.40
  -4  29  -5  356.86   40.90
   4 -29   5  313.77   46.80
   4  29   6   70.59   26.70
  -4  29  -6  100.99   27.60
   4 -29   6   67.19   37.60
   4  30  -7   17.60   26.20
  -4 -30   7  -40.20   36.20
   4 -30  -7    3.20   30.00
   4  30  -6   81.89   24.60
   4 -30  -6   83.19   29.30
  -4 -30   6   47.40   32.70
   4  30  -5   19.20   22.80
  -4  30   5    1.80   25.40
  -4 -30   5  -18.50   33.90
   4 -30  -5   38.80   27.70
   4  30  -4   42.20   23.10
  -4  30   4   37.50   18.50
  -4 -30   4  -31.30   27.80
   4 -30  -4   65.99   26.90
  -4  30   3  109.89   21.80
   4  30  -3  130.69   24.20
   4 -30  -3  138.89   28.10
  -4  30   2  115.89   21.10
   4  30  -2  107.59   22.80
   4 -30  -2  139.09   28.20
  -4  30   1  456.95   42.60
   4  30  -1  492.75   44.50
   4 -30  -1  508.85   49.90
  -4  30   0  124.89   21.10
   4  30   0  114.29   22.40
   4 -30   0   76.99   29.50
   4  30   1  119.49   22.80
  -4  30  -1  113.59   22.40
   4 -30   1   76.99   31.90
   4  30   2  189.58   28.10
  -4  30  -2  197.48   25.60
   4 -30   2  128.49   36.10
   4  30   3   16.60   21.90
  -4  30  -3  -29.70   22.00
   4 -30   3  -35.30   32.90
  -4  30  -4  -26.70   23.30
   4  30   4  -30.30   23.60
   4 -30   4  -67.79   36.00
  -4  30  -5    8.80   25.30
   4  30   5   21.30   26.20
   4 -30   5  -24.20   37.00
   4 -30   6   40.20   47.30
  -4 -31   7   52.19   40.20
   4 -31  -7  108.79   31.90
   4  31  -6  215.88   30.10
  -4 -31   6  198.48   39.60
   4 -31  -6  197.58   34.10
   4  31  -5   63.49   25.10
   4 -31  -5   42.40   28.00
  -4  31   4  133.39   32.30
   4  31  -4  147.29   26.60
   4 -31  -4  198.78   30.70
  -4  31   3   45.50   19.70
   4  31  -3   67.99   24.10
   4 -31  -3   90.59   28.00
  -4  31   2   94.79   21.90
   4  31  -2   91.19   25.00
   4 -31  -2  163.58   29.50
  -4  31   1   19.60   20.00
   4  31  -1   24.60   20.80
   4 -31  -1   63.79   28.00
  -4  31   0  487.15   46.70
   4  31   0  545.45   46.30
   4 -31   0  481.25   52.39
   4  31   1  501.55   49.00
  -4  31  -1  460.05   45.60
  -4  31  -2  237.98   28.80
   4  31   2  221.48   28.50
   4 -31   2  186.98   38.30
   4  31   3    2.50   26.70
  -4  31  -3   -2.10   22.90
   4 -31   3  -82.39   37.80
   4  31   4  -28.60   31.80
  -4  31  -4  -22.30   24.30
   4 -31   4  -52.29   36.00
  -4  31  -5  -13.20   26.70
   4  31   5  -20.30   27.50
   4 -31   5  -47.10   38.50
   4  32  -6   57.89   26.70
   4 -32  -6   36.00   29.80
  -4 -32   6  -51.29   37.10
   4  32  -5   60.79   26.70
   4 -32  -5  105.49   29.30
   4  32  -4  106.89   25.80
  -4  32   4   65.79   22.10
   4 -32  -4  120.59   28.80
   4  32  -3    1.00   23.40
  -4  32   3    9.20   20.60
   4 -32  -3   52.99   27.40
  -4  32   2  156.18   24.60
   4  32  -2  156.88   26.70
   4 -32  -2  198.18   30.90
   4  32  -1   72.79   25.40
  -4  32   1   85.49   22.60
   4 -32  -1  101.89   30.10
  -4  32   0   94.69   23.60
   4  32   0   75.49   25.30
   4 -32   0  105.89   31.10
  -4  32  -1   41.90   22.20
   4  32   1   26.80   22.30
   4 -32   1  -39.40   32.40
  -4  32  -2  161.78   26.70
   4  32   2  152.18   29.20
   4 -32   2   97.29   36.30
   4  32   3  -13.60   25.80
  -4  32  -3  -36.90   23.90
   4 -32   3  -55.79   34.30
  -4  32  -4    7.60   25.30
   4  32   4  -20.30   29.30
   4 -32   4  -77.69   43.40
   4  33  -5  116.79   28.30
   4 -33  -5  159.78   32.20
   4  33  -4   40.50   26.30
  -4  33   4    8.80   22.30
   4 -33  -4   68.09   28.80
  -4  33   3   -3.40   21.30
   4  33  -3   25.40   24.80
   4 -33  -3   60.49   28.50
  -4  33   2    6.70   21.50
   4  33  -2   25.60   23.60
   4 -33  -2   73.39   28.70
   4  33  -1  146.09   26.90
  -4  33   1  160.48   25.50
   4 -33  -1  184.18   31.70
  -4  33   0    5.70   22.30
   4  33   0   20.10   23.50
   4 -33   0   -6.60   29.60
  -4  33  -1  753.42   63.59
   4  33   1  867.31   67.39
   4 -33   1  696.03   71.49
   4  33   2   34.40   26.30
  -4  33  -2    8.60   24.30
   4 -33   2  -70.79   35.80
  -4  33  -3    4.70   25.80
   4  33   3   -9.90   28.20
   4 -33   3  -82.89   37.90
  -4  33  -4  -26.30   27.10
   4  33   4  -14.00   30.10
   4 -33   4  -96.39   42.10
  -4  34   4   52.29   23.90
   4  34  -4   47.00   27.40
   4 -34  -4  107.69   30.00
   4  34  -3   56.89   27.20
  -4  34   3   49.10   23.10
   4 -34  -3  119.79   31.20
  -4  34   2  190.08   29.30
   4 -34  -2  350.76   41.50
   4  34  -1   35.70   25.70
  -4  34   1   18.70   23.00
   4 -34  -1   76.19   29.10
   4  34   0   14.20   27.10
  -4  34   0    9.00   23.10
   4 -34   0   12.60   31.70
  -4  34  -1   38.90   24.70
   4  34   1   71.39   25.30
   4 -34   1  -18.70   33.50
   4  34   2   62.49   28.80
  -4  34  -2   54.89   25.00
   4 -34   2  -59.69   40.30
  -4  34  -3   11.20   26.00
   4  34   3   26.90   27.00
   4 -34   3  -60.79   45.50
   4  35  -3   81.49   28.20
  -4  35   3   33.00   24.40
   4 -35  -3  108.09   30.70
   4  35  -2  193.08   30.60
  -4  35   2  176.58   27.60
   4  35  -1  122.59   28.00
  -4  35   1   88.49   26.60
   4 -35  -1  180.08   32.50
  -4  35   0   48.00   26.00
   4  35   0   96.39   30.20
   4 -35   0  116.09   34.10
   4  35   1  190.68   32.80
  -4  35  -1  181.98   28.80
   4 -35   1  127.79   37.10
  -4  35  -2   73.09   26.00
   4  35   2   79.99   30.00
   4 -35   2  -45.80   39.00
   4  36  -1   23.50   29.90
  -4  36   1    4.00   24.60
   4 -36  -1  130.19   33.20
   4  36   0   75.89   27.80
   4 -36   0   61.09   35.40
   5   0 -13   32.90   32.20
   5   0 -12  787.52   69.59
   5   0 -11    2.30   24.60
   5   0 -10  739.03   65.39
   5   0 -10  812.62   58.89
   5   0  -9  -11.50   18.10
   5   0  -9   -6.30    8.80
   5   0  -8   45.00    8.60
   5   0  -7    4.70   13.50
   5   0  -7    1.30    7.10
   5   0  -6   -2.90    7.00
   5   0  -6   -9.70   12.30
   5   0  -5    4.20   11.00
   5   0  -4 4219.38  315.27
   5   0  -4 4464.75  314.77
   5   0  -3   -9.10    8.10
   5   0  -3   -1.20    5.70
   5   0  -2 3308.27  239.98
   5   0  -2 3311.97  240.28
   5   0  -1   -9.40    8.00
  -5   0   0    4.80    6.50
   5   0   0   40.50    8.90
  -5   0  -1    0.20    6.80
   5   0   1   24.50    9.30
  -5   0  -2 3727.13  272.67
   5   0   2 3788.52  272.97
  -5   0  -3   -1.10    8.20
   5   0   3   -2.40   10.10
   5   0   4 2106.79  156.78
  -5   0  -4 2174.58  156.08
  -5   0  -5   -1.50    9.40
  -5   0  -6 1044.90   77.79
  -5   0  -7   -3.20   11.80
  -5   0  -8   11.30   13.30
  -5   0  -9   10.60   15.00
  -5   0 -10  283.97   32.00
   5   1 -13  324.27   45.60
   5  -1 -13  386.06   49.70
   5   1 -12   53.69   27.50
   5  -1 -12   48.30   28.50
   5   1 -11   33.80   23.30
   5  -1 -11   29.00   23.60
   5   1 -10   30.50   20.90
   5   1 -10   27.70   10.60
   5  -1 -10   32.20   21.10
   5  -1 -10   14.30    9.80
   5   1  -9  108.29   21.20
   5   1  -9  105.89   12.50
   5  -1  -9  108.59   11.70
   5  -1  -9  104.39   20.40
   5   1  -8   73.79    9.90
   5  -1  -8   71.99    9.40
   5  -1  -8   55.99   27.30
   5   1  -7   21.60    7.80
   5   1  -7   18.60   13.90
   5  -1  -7   20.40    6.50
   5  -1  -7   13.60   14.10
   5   1  -6  120.59   15.40
   5   1  -6  130.79   12.30
   5  -1  -6  122.09   16.00
   5   1  -5 2287.17  165.18
   5   1  -5 2264.67  165.88
   5  -1  -5 2263.47  165.88
   5   1  -4 1182.78   80.19
   5   1  -4 1051.19   80.79
   5  -1  -4 1050.69   81.19
   5   1  -3   38.00    6.50
   5   1  -3   19.10    8.30
   5  -1  -3   25.50    6.10
   5  -1  -3   11.70    9.00
   5   1  -2   -7.00    5.90
   5   1  -2   -4.30    7.40
   5  -1  -2   -7.70    8.20
   5  -1  -2   -6.30    5.30
   5   1  -1  595.04   45.00
  -5   1   1  590.04   44.30
   5  -1  -1  610.34   45.50
   5   1   0  174.58   15.30
  -5   1   0  115.99   13.30
   5  -1   0  149.39   16.20
  -5  -1   0  115.99   12.70
   5   1   1 2490.35  190.38
  -5   1  -1 2720.73  190.08
  -5  -1  -1 2671.03  190.08
   5  -1   1 2586.14  190.48
  -5   1  -2  259.67   23.10
   5   1   2  299.07   24.70
  -5  -1  -2  258.47   23.10
   5  -1   2  305.87   25.30
   5   1   3  423.86   35.20
  -5   1  -3  435.16   33.80
  -5  -1  -3  448.06   33.90
   5  -1   3  431.16   35.60
  -5   1  -4   -7.80    8.60
   5   1   4   -3.30   11.00
   5  -1   4    3.90   11.10
  -5  -1  -4   -0.80    8.80
  -5   1  -5   99.89   11.50
   5  -1   5   64.59   14.50
  -5  -1  -5   70.49   11.40
  -5   1  -6  182.78   18.70
  -5  -1  -6  148.09   18.40
  -5   1  -7   56.89   12.90
  -5  -1  -7   35.70   21.00
  -5   1  -8  -10.80   12.20
  -5  -1  -8    1.50   12.10
  -5   1  -9  359.56   33.30
  -5  -1  -9  391.06   34.90
  -5   1 -10  122.09   18.40
  -5  -1 -10  131.19   20.90
   5   2 -13  111.59   33.70
   5  -2 -13  115.59   32.80
   5   2 -12  163.18   32.60
   5  -2 -12  179.88   31.70
   5   2 -11  575.64   56.49
   5  -2 -11  588.54   57.29
   5   2 -10  356.76   30.60
   5   2 -10  367.06   38.40
   5  -2 -10  361.26   41.70
   5   2  -9  197.48   19.00
   5   2  -9  185.58   23.90
   5  -2  -9  169.68   16.80
   5  -2  -9  183.98   23.60
   5   2  -8  220.68   19.80
   5  -2  -8  223.58   20.60
   5  -2  -8  200.88   25.00
   5   2  -7 1753.82  129.49
   5   2  -7 1801.32  130.89
   5  -2  -7 1780.22  131.09
   5   2  -6  166.48   19.50
   5   2  -6  149.49   16.00
   5  -2  -6  160.38   18.00
   5   2  -5  104.29   13.80
   5   2  -5  145.29   14.60
   5  -2  -5  103.29   14.40
   5   2  -4 2308.57  170.68
   5   2  -4 2438.46  170.38
   5  -2  -4 2288.47  170.98
   5   2  -3 2191.38  155.18
   5   2  -3 2095.29  155.48
   5  -2  -3 2193.58  155.28
   5  -2  -3 2066.09  155.68
   5   2  -2  518.45   37.60
   5   2  -2  497.95   38.10
   5  -2  -2  491.35   38.70
   5   2  -1  735.43   56.69
  -5   2   1  797.42   56.59
   5  -2  -1  777.12   57.89
  -5   2   0  243.78   20.70
   5  -2   0  271.77   23.40
   5   2   1  831.92   65.19
  -5   2  -1  897.31   64.79
   5  -2   1  890.01   65.79
  -5  -2  -1  899.11   64.79
   5   2   2  274.47   24.40
  -5   2  -2  272.17   22.70
  -5  -2  -2  264.37   22.20
   5  -2   2  284.97   25.10
  -5   2  -3 1600.74  119.19
   5   2   3 1623.84  119.69
  -5  -2  -3 1657.03  119.19
   5  -2   3 1650.03  120.09
  -5   2  -4 2096.99  153.08
  -5  -2  -4 2126.69  153.08
   5  -2   4 2076.39  153.78
  -5   2  -5  252.27   22.70
   5  -2   5  255.37   25.60
  -5  -2  -5  248.18   23.40
  -5   2  -6  123.89   14.20
  -5  -2  -6  109.09   13.70
  -5   2  -7  263.47   23.80
  -5  -2  -7  220.38   30.20
  -5   2  -8  151.28   17.50
  -5  -2  -8  136.89   20.80
  -5  -2  -8  168.68   18.00
  -5   2  -9   94.69   18.00
  -5  -2  -9  112.19   20.90
  -5  -2  -9  122.29   16.20
  -5   2 -10  143.09   20.90
  -5  -2 -10  133.89   20.10
   5   3 -13   57.19   32.20
   5  -3 -13   53.09   32.30
   5   3 -12  102.79   28.20
   5  -3 -12   83.39   28.50
   5   3 -11   41.60   24.70
   5   3 -11   40.40   12.80
   5  -3 -11   57.59   24.70
   5   3 -10    3.60   11.60
   5   3 -10   19.70   19.80
   5  -3 -10   -3.90   20.60
   5   3  -9 1071.99   81.89
   5   3  -9 1057.99   78.39
   5  -3  -9 1046.10   82.99
   5   3  -8  386.96   30.30
   5  -3  -8  362.06   37.40
   5   3  -7   42.90    9.60
   5   3  -7   55.39   14.70
   5  -3  -7   57.89   15.10
   5   3  -6   15.40   11.60
   5   3  -6   30.70    9.10
   5  -3  -6   19.10   12.70
   5   3  -5  807.72   60.69
   5   3  -5  822.92   59.99
   5  -3  -5  786.12   61.29
   5   3  -4  908.31   62.59
   5   3  -4  826.62   62.89
   5  -3  -4  807.62   63.69
   5   3  -3  186.18   15.20
   5   3  -3  165.28   16.40
   5  -3  -3  147.29   16.10
   5   3  -2   18.10    6.70
   5   3  -2   20.90    6.50
  -5   3   2   20.80    5.90
   5  -3  -2    6.50    9.60
  -5   3   1 1001.90   71.69
   5   3  -1  947.31   71.69
   5  -3  -1  982.10   72.69
  -5   3   0  168.78   15.40
   5  -3   0  177.98   19.40
   5   3   1   -4.80    8.00
  -5   3  -1    4.50    6.40
   5  -3   1   38.10   10.60
  -5  -3  -1   -1.10    7.00
   5   3   2 1162.08   82.29
  -5   3  -2 1097.99   81.79
   5  -3   2 1099.99   82.89
  -5  -3  -2 1094.39   81.89
   5   3   3 2141.09  153.28
  -5   3  -3 2048.90  152.88
  -5  -3  -3 2072.19  152.88
   5  -3   3 2137.29  153.68
  -5   3  -4  130.39   13.80
   5  -3   4  126.99   16.10
  -5  -3  -4  136.99   13.70
  -5   3  -5 1160.28   86.39
  -5  -3  -5 1187.18   86.29
   5  -3   5 1166.08   87.89
  -5   3  -6  151.68   17.00
  -5  -3  -6  165.48   18.10
   5  -3   6  218.68   23.30
  -5  -3  -6  144.19   18.30
  -5   3  -7  146.19   16.20
  -5  -3  -7  129.29   18.40
  -5   3  -8   32.50   14.20
  -5  -3  -8   58.19   13.40
  -5  -3  -8   26.30   16.70
  -5   3  -9  127.09   19.30
  -5  -3  -9  138.69   22.00
  -5  -3  -9  149.39   18.90
  -5   3 -10  272.97   33.10
  -5  -3 -10  279.07   37.20
  -5  -3 -10  294.37   32.10
   5   4 -13   58.79   40.20
   5  -4 -13   62.29   32.60
   5   4 -12   93.79   31.00
   5  -4 -12  101.79   29.10
   5   4 -11  570.94   45.10
   5   4 -11  580.44   54.79
   5  -4 -11  539.45   53.29
   5   4 -10   13.60   21.70
   5   4 -10   26.00   12.30
   5  -4 -10   20.40   21.80
   5   4  -9  403.56   34.70
   5   4  -9  448.06   41.40
   5  -4  -9  456.35   40.70
   5   4  -8 1519.15  118.89
   5   4  -8 1595.94  115.19
   5  -4  -8 1602.04  117.19
   5   4  -7  240.18   20.80
   5   4  -7  210.18   23.90
   5  -4  -7  208.68   25.40
   5   4  -6 1633.34  121.39
   5   4  -6 1670.63  121.99
   5  -4  -6 1681.43  122.39
   5   4  -5  930.41   68.59
   5   4  -5  934.51   68.09
   5  -4  -5  888.81   68.99
   5   4  -4  449.06   35.70
   5   4  -4  508.15   35.20
   5  -4  -4  413.66   36.50
   5   4  -3 1340.97   96.19
   5   4  -3 1309.07   96.39
   5  -4  -3 1304.37   96.99
   5   4  -2  284.47   23.00
  -5   4   2  318.77   22.30
   5  -4  -2  244.28   25.40
   5   4  -1  562.04   43.30
  -5   4   1  576.34   43.10
   5  -4  -1  612.14   45.10
  -5   4   0 1376.76   97.29
   5   4   0 1335.07   97.19
   5  -4   0 1285.97   98.39
  -5   4  -1  243.08   20.60
   5  -4   1  275.77   24.60
   5   4   2 1783.22  122.99
  -5   4  -2 1644.94  122.69
   5  -4   2 1671.33  123.49
  -5  -4  -2 1626.64  122.69
   5   4   3  721.93   53.09
  -5   4  -3  679.43   52.29
   5  -4   3  713.43   53.89
  -5  -4  -3  686.63   52.39
  -5   4  -4  505.85   39.90
  -5  -4  -4  518.85   40.20
   5  -4   4  532.95   41.90
  -5   4  -5  585.94   43.50
   5  -4   5  558.84   45.50
  -5  -4  -5  554.94   43.30
  -5  -4  -5  555.54   44.10
  -5   4  -6  247.88   23.30
   5  -4   6  227.58   27.70
  -5  -4  -6  259.47   23.70
  -5  -4  -6  245.88   25.20
  -5   4  -7   23.80   12.60
   5  -4   7   32.30   16.50
  -5  -4  -7   32.30   13.70
  -5  -4  -7   25.20   16.90
  -5   4  -8  865.51   65.69
  -5  -4  -8  853.21   67.19
   5  -4   8  840.42   67.99
  -5  -4  -8  857.81   64.59
  -5   4  -9   93.99   18.20
  -5  -4  -9  102.49   20.50
  -5  -4  -9  105.69   17.10
  -5   4 -10   -9.90   18.00
   5  -4  10   27.10   23.90
  -5  -4 -10    0.10   16.40
  -5  -4 -10   11.00   20.80
   5   5 -12  101.59   29.30
   5  -5 -12   85.89   29.40
   5   5 -11   14.90   24.50
   5   5 -11    0.80   13.80
   5  -5 -11   21.50   25.10
   5   5 -10   20.00   12.30
   5   5 -10   41.10   21.90
   5  -5 -10   28.20   21.00
   5   5  -9 1471.05  110.09
   5   5  -9 1437.46  107.19
   5  -5  -9 1470.55  110.59
   5   5  -8   46.60   22.40
   5   5  -8   46.80   11.20
   5  -5  -8   44.30   17.30
   5   5  -7    6.40   12.80
   5   5  -7   18.20   10.00
   5  -5  -7   14.10   14.70
   5   5  -6  766.62   59.39
   5   5  -6  793.12   60.19
   5  -5  -6  824.82   60.99
   5   5  -5  242.38   21.20
   5   5  -5  220.68   21.80
   5  -5  -5  209.58   23.20
   5   5  -4   97.09   11.40
   5  -5  -4   82.29   13.40
   5   5  -3  699.93   52.89
   5   5  -3  744.93   52.69
   5  -5  -3  684.23   53.99
   5   5  -2  220.08   17.50
  -5   5   2  215.88   16.70
   5  -5  -2  164.08   20.50
  -5   5   1 2959.10  213.58
   5   5  -1 2905.01  213.68
   5  -5  -1 2971.10  214.38
  -5   5   0   41.80    7.70
   5   5   0   38.00    7.30
   5  -5   0   68.59   12.00
   5   5   1  123.69   13.40
  -5   5  -1  128.99   13.80
   5  -5   1  159.38   18.60
  -5   5  -2  177.88   18.70
   5   5   2  223.68   19.70
   5  -5   2  232.28   23.20
  -5   5  -3 1332.37   98.99
  -5  -5  -3 1353.96   99.09
   5  -5   3 1376.36  100.49
  -5   5  -4  206.38   19.40
   5  -5   4  216.08   24.10
  -5  -5  -4  190.58   19.30
  -5   5  -5 1958.60  141.39
   5  -5   5 1927.71  142.49
  -5  -5  -5 1938.51  141.29
  -5  -5  -5 1912.01  141.59
  -5   5  -6   40.30   17.60
  -5  -5  -6   59.59   11.70
   5  -5   6   48.50   21.70
  -5  -5  -6   59.99   13.40
  -5   5  -7  273.87   26.60
  -5  -5  -7  271.87   26.00
  -5  -5  -7  271.27   30.10
   5  -5   7  276.37   30.70
  -5   5  -8  140.69   18.70
  -5  -5  -8  149.88   20.50
  -5  -5  -8  164.28   17.90
   5  -5   8  148.29   22.50
  -5   5  -9   17.30   16.00
   5  -5   9   28.30   20.80
  -5  -5  -9   13.60   15.20
  -5  -5  -9   20.30   18.50
  -5   5 -10   32.40   16.40
   5  -5  10   34.80   23.90
  -5  -5 -10   32.50   21.30
  -5  -5 -10   38.70   17.30
   5   6 -12   89.19   30.80
   5  -6 -12   71.39   31.20
   5   6 -11   13.20   14.60
   5   6 -11   32.90   23.90
   5  -6 -11   39.40   24.90
   5   6 -10   68.29   13.80
   5   6 -10   47.40   21.90
   5  -6 -10   38.90   21.70
   5   6  -9   57.39   12.70
   5   6  -9   63.79   20.50
   5  -6  -9   57.89   20.70
   5   6  -8 1472.35  121.69
   5   6  -8 1656.83  115.89
   5  -6  -8 1582.64  118.19
   5   6  -7 1182.38   87.49
   5   6  -7 1180.98   88.79
   5  -6  -7 1190.78   89.09
   5   6  -6 2086.19  150.48
   5   6  -6 2027.10  149.99
   5  -6  -6 2056.39  150.88
   5   6  -5  761.02   58.19
   5   6  -5  761.02   58.19
   5  -6  -5  795.72   59.09
   5   6  -4  261.77   23.30
   5   6  -4  330.87   23.90
   5  -6  -4  232.58   25.30
   5   6  -3   66.79    9.00
   5   6  -3   63.39    9.20
  -5   6   2  600.24   43.40
   5   6  -2  609.24   43.80
   5  -6  -2  544.75   45.50
   5   6  -1  427.06   32.90
  -5   6   1  399.96   32.70
   5  -6  -1  487.45   36.40
   5   6   0 3831.82  278.87
  -5   6   0 4036.10  278.87
   5  -6   0 3666.23  279.57
   5   6   1  618.24   47.70
  -5   6  -1  635.44   47.90
   5  -6   1  675.83   49.99
  -5   6  -2 1141.19   87.29
   5   6   2 1282.07   87.59
   5  -6   2 1145.99   88.49
  -5   6  -3   83.49   11.00
   5  -6   3  108.49   14.70
  -5   6  -4   -3.20    9.00
  -5  -6  -4   -1.00    9.10
   5  -6   4   -9.50   12.70
  -5  -6  -4  -12.80    8.60
  -5   6  -5  140.59   14.70
   5  -6   5  141.69   17.90
  -5  -6  -5  123.99   14.20
  -5  -6  -5  140.39   15.30
  -5   6  -6  441.26   38.10
  -5  -6  -6  452.05   36.90
   5  -6   6  469.55   41.00
  -5  -6  -6  471.75   38.40
  -5   6  -7  450.25   36.90
   5  -6   7  458.75   42.10
  -5  -6  -7  452.75   38.40
  -5  -6  -7  444.66   38.90
  -5   6  -8 1268.17   93.19
  -5  -6  -8 1272.07   94.39
  -5  -6  -8 1251.27   92.49
   5  -6   8 1180.38   95.39
  -5   6  -9   15.70   16.00
  -5  -6  -9   12.10   14.60
  -5  -6  -9   25.10   18.90
   5  -6   9   18.20   21.00
  -5   6 -10   55.89   17.30
   5  -6  10   64.89   24.20
  -5  -6 -10   70.99   22.00
   5   7 -12   28.90   29.00
   5  -7 -12    7.70   30.10
   5   7 -11   87.19   16.30
   5   7 -11   72.59   26.00
   5  -7 -11   84.69   26.40
   5   7 -10  139.59   17.40
   5   7 -10  150.28   23.80
   5  -7 -10  142.89   25.50
   5   7  -9  344.07   36.70
   5   7  -9  343.57   29.20
   5  -7  -9  309.57   37.70
   5   7  -8  443.26   35.30
   5   7  -8  419.16   46.60
   5  -7  -8  432.76   39.70
   5   7  -7  215.48   24.40
   5   7  -7  212.38   21.40
   5  -7  -7  204.58   25.40
   5   7  -6  328.87   29.40
   5   7  -6  323.57   28.50
   5  -7  -6  344.67   31.90
   5   7  -5  170.48   19.80
   5   7  -5  170.88   18.70
   5  -7  -5  172.08   21.10
   5   7  -4  654.53   45.90
   5   7  -4  592.34   45.90
   5  -7  -4  565.34   47.30
   5   7  -3  228.48   19.00
   5   7  -3  252.67   19.40
   5  -7  -3  180.98   20.80
   5   7  -2  996.40   71.89
  -5   7   2 1018.90   71.49
   5  -7  -2  914.81   73.29
  -5   7   1 2781.32  199.28
   5   7  -1 2700.83  199.48
   5  -7  -1 2758.92  200.28
   5   7   0  787.62   59.39
  -5   7   0  778.92   59.29
   5  -7   0  854.81   61.39
  -5   7  -1  819.32   60.59
   5   7   1  808.02   60.49
   5  -7   1  836.52   62.59
  -5   7  -2  172.08   17.70
   5   7   2  218.58   18.30
   5   7   2  171.58   17.20
   5  -7   2  198.28   22.10
  -5   7  -3   21.90    8.90
   5  -7   3   23.30   12.90
  -5   7  -4   19.00    9.20
  -5  -7  -4    5.00    9.30
   5  -7   4   16.10   13.50
  -5   7  -5  674.23   51.89
  -5  -7  -5  684.63   52.19
  -5  -7  -5  681.83   51.59
   5  -7   5  694.03   54.19
  -5   7  -6  387.86   33.50
  -5  -7  -6  413.16   32.20
  -5  -7  -6  389.76   34.00
   5  -7   6  395.66   36.70
  -5   7  -7  239.68   26.20
  -5  -7  -7  259.47   24.70
  -5  -7  -7  250.87   27.50
   5  -7   7  254.67   30.50
  -5   7  -8   22.80   14.90
   5  -7   8   40.40   19.50
  -5  -7  -8   23.30   12.80
  -5  -7  -8   25.80   16.60
  -5   7  -9   42.60   15.50
   5  -7   9   29.90   21.90
  -5  -7  -9   34.50   19.40
  -5  -7  -9   38.50   14.60
  -5   7 -10  -14.40   18.20
  -5  -7 -10    6.10   21.20
   5  -7  10   -4.90   24.30
   5   8 -12   55.29   28.80
   5   8 -12   54.49   17.00
   5  -8 -12   45.90   31.00
   5   8 -11   18.70   30.10
   5   8 -11   17.80   17.60
   5  -8 -11   13.20   26.00
   5   8 -10   26.70   14.50
   5   8 -10   30.90   20.50
   5  -8 -10   21.60   23.20
   5   8  -9  217.08   24.50
   5   8  -9  230.08   29.00
   5  -8  -9  230.78   31.10
   5   8  -8  277.07   25.70
   5  -8  -8  268.27   33.30
   5   8  -7 1505.25  109.49
   5   8  -7 1462.45  108.99
   5  -8  -7 1476.55  110.39
   5   8  -6  424.36   35.30
   5   8  -6  417.96   34.30
   5  -8  -6  433.26   36.90
   5   8  -5  549.25   42.60
   5   8  -5  558.34   43.00
   5  -8  -5  542.45   44.10
   5   8  -4   86.69   11.00
   5   8  -4  112.49   12.50
   5  -8  -4   62.39   14.60
   5   8  -3   59.49    9.20
   5   8  -3   36.30    8.00
  -5   8   2  308.67   23.30
   5   8  -2  326.07   24.20
   5  -8  -2  238.38   27.70
   5   8  -1 3920.11  290.27
  -5   8   1 4070.59  290.07
   5  -8  -1 4013.10  290.97
   5   8   0 2606.54  187.38
  -5   8   0 2606.24  187.28
   5  -8   0 2522.45  188.48
   5   8   1 2102.79  151.38
  -5   8  -1 2069.69  151.38
   5  -8   1 2066.79  152.48
  -5   8  -2  102.79   10.80
   5   8   2   77.49   10.00
   5  -8   2   85.59   14.80
   5   8   3  142.59   15.20
  -5   8  -3  148.39   15.10
   5  -8   3  177.98   21.30
  -5   8  -4   60.19   10.30
   5  -8   4   58.49   14.90
  -5  -8  -4   72.99   10.90
  -5   8  -5  329.77   28.80
   5  -8   5  339.67   32.60
  -5  -8  -5  351.16   29.40
  -5   8  -6   47.30   11.90
  -5  -8  -6   54.49   13.50
   5  -8   6   49.30   16.50
  -5   8  -7 1037.40   79.29
   5  -8   7 1054.89   82.09
  -5  -8  -7 1070.19   79.79
  -5   8  -8  311.67   30.40
  -5  -8  -8  355.96   34.50
   5  -8   8  310.77   36.40
  -5   8  -9  346.57   34.80
   5  -8   9  434.06   43.30
  -5  -8  -9  391.16   40.60
  -5   8 -10    9.00   16.70
   5  -8  10    8.00   26.40
  -5  -8 -10   -5.40   21.70
   5   9 -12   20.70   18.10
   5   9 -12   33.20   38.20
   5  -9 -12   11.40   31.00
   5   9 -11    3.10   15.70
   5   9 -11    1.10   24.90
   5  -9 -11  -16.80   26.40
   5   9 -10  310.67   30.80
   5   9 -10  368.56   36.90
   5  -9 -10  317.67   39.40
   5   9  -9   56.39   18.60
   5   9  -9   64.99   14.80
   5  -9  -9   65.79   22.00
   5   9  -8  183.58   19.00
   5  -9  -8  172.38   23.90
   5   9  -7   22.60   13.40
   5   9  -7   42.30   12.70
   5  -9  -7   21.30   17.20
   5   9  -6  150.38   17.00
   5   9  -6  148.99   19.50
   5  -9  -6  145.59   19.20
   5   9  -5  979.00   74.39
   5   9  -5  971.80   73.79
   5  -9  -5 1032.70   75.19
   5   9  -4   33.00    9.10
   5   9  -4   56.59   10.80
   5  -9  -4   12.00   13.50
   5   9  -3   41.70    9.30
  -5   9   3    5.40    9.40
   5   9  -3   21.10    7.40
   5  -9  -3  -38.90   12.20
  -5   9   2 2524.95  181.88
   5   9  -2 2480.45  182.18
   5  -9  -2 2514.65  183.18
  -5   9   1 1013.90   77.49
   5   9  -1 1052.69   77.69
   5  -9  -1 1117.69   80.09
  -5   9   0  184.18   16.80
   5   9   0  195.48   17.30
   5   9   1 1463.15  105.49
  -5   9  -1 1408.46  105.39
   5  -9   1 1459.45  106.99
   5   9   2  275.17   22.80
  -5   9  -2  262.87   23.20
   5  -9   2  301.17   27.50
  -5   9  -3   10.30    8.80
   5   9   3    4.00    7.60
   5  -9   3   18.10   13.30
  -5  -9  -3    7.90    8.00
   5   9   4  132.79   16.40
  -5   9  -4  143.99   15.00
   5  -9   4  174.68   19.00
  -5  -9  -4  147.99   17.10
  -5   9  -5    1.40   11.00
   5   9   5   -5.30    8.50
   5  -9   5   -4.70   16.20
  -5  -9  -5    0.40   10.50
  -5   9  -6  173.18   17.60
  -5  -9  -6  166.38   21.50
   5  -9   6  158.58   21.60
  -5   9  -7   50.29   13.70
   5  -9   7   56.79   18.90
  -5  -9  -7   52.09   15.20
  -5   9  -8   73.19   15.30
   5  -9   8   58.39   21.70
  -5  -9  -8   63.09   17.80
  -5   9  -9  255.57   30.00
  -5  -9  -9  247.08   33.80
   5  -9   9  245.88   30.50
  -5   9 -10   80.19   20.00
   5  -9  10   47.90   26.90
   5  10 -12  207.98   33.80
   5  10 -12  202.48   23.60
   5 -10 -12  200.08   36.20
   5  10 -11   91.89   17.30
   5  10 -11   72.39   25.20
   5 -10 -11   69.89   28.00
   5  10 -10  949.21   74.69
   5 -10 -10  931.91   76.29
   5  10  -9  175.38   24.90
   5  10  -9  229.98   21.70
   5 -10  -9  201.88   27.20
   5  10  -8    5.50   13.10
   5 -10  -8   -8.60   18.90
   5  10  -7  234.98   24.60
   5  10  -7  224.38   23.40
   5  10  -6  220.88   22.30
   5  10  -6  176.18   21.50
   5 -10  -6  188.08   22.00
   5  10  -5 1232.68   91.49
   5  10  -5 1188.58   90.79
   5 -10  -5 1279.67   92.49
   5  10  -4 1848.12  136.29
   5  10  -4 1836.52  136.69
   5 -10  -4 1925.11  137.49
   5  10  -3  538.75   39.70
  -5  10   3  530.25   39.10
   5  10  -3  570.44   40.70
   5 -10  -3  460.45   42.50
   5  10  -2  771.72   54.29
  -5  10   2  711.43   53.59
   5 -10  -2  695.53   56.39
   5  10  -1  992.60   73.69
  -5  10   1  962.30   73.39
   5 -10  -1 1059.69   76.29
  -5  10   0   57.99    8.50
   5  10   0   61.39    8.40
  -5  10  -1 2245.98  166.28
   5  10   1 2326.57  166.38
   5 -10   1 2288.07  167.58
  -5  10  -2  247.48   22.10
   5  10   2  255.37   21.90
   5 -10   2  284.87   27.10
   5  10   3   39.40    8.60
  -5  10  -3   48.30    9.90
  -5 -10  -3   37.40    8.60
   5 -10   3   38.20   14.30
  -5  10  -4 1257.37   94.39
   5  10   4 1270.87   94.09
   5 -10   4 1333.47   96.19
  -5 -10  -4 1274.97   94.29
   5  10   5  146.49   17.60
  -5 -10  -5  172.48   19.20
   5 -10   5  159.78   31.70
  -5  10  -6   92.89   14.10
   5  10   6   79.59   12.10
   5 -10   6   82.59   18.70
  -5 -10  -6   79.49   14.50
   5  10   7  397.96   44.30
  -5  10  -7  502.65   38.80
   5 -10   7  459.15   43.60
  -5 -10  -7  489.25   40.80
   5  10   8   10.20   12.40
  -5  10  -8   23.80   14.90
  -5 -10  -8   -6.40   16.70
   5 -10   8    6.10   20.20
  -5  10  -9  289.67   32.00
   5 -10   9  348.07   40.00
  -5 -10  -9  319.17   36.40
  -5  10 -10  244.38   25.60
   5 -10  10  223.78   32.70
   5  11 -12   68.19   30.00
   5  11 -12   48.80   19.50
   5 -11 -12   61.59   33.00
   5  11 -11  262.27   29.60
   5  11 -11  272.07   33.00
   5 -11 -11  253.67   35.10
   5  11 -10  249.48   31.30
   5  11 -10  169.08   21.80
   5 -11 -10  189.88   29.80
   5  11  -9   31.00   14.90
   5  11  -9   16.60   19.70
   5 -11  -9   39.10   22.60
   5  11  -8   86.29   15.60
   5  11  -8   63.49   19.60
   5 -11  -8   59.09   20.40
   5  11  -7  112.19   16.00
   5  11  -7  120.09   16.70
   5 -11  -7  112.09   20.90
   5  11  -6   47.30   12.50
   5  11  -6   44.00   13.90
   5 -11  -6   40.10   16.70
   5  11  -5  968.50   72.79
   5  11  -5  952.80   72.29
   5 -11  -5  993.60   73.89
   5  11  -4  641.54   48.60
   5  11  -4  614.54   47.30
   5 -11  -4  626.14   50.19
  -5  11   3   54.69    7.50
   5  11  -3   71.79   10.80
   5  11  -3   60.89    8.70
   5 -11  -3   12.80   14.70
  -5  11   2 1868.01  135.89
   5  11  -2 1858.91  136.29
   5 -11  -2 1878.31  137.59
  -5  11   1   -7.50    7.00
   5  11  -1   -0.40    8.00
  -5  11   0    2.20    7.30
   5  11   0    0.70    7.50
   5 -11   0   79.69   15.10
   5  11   1  268.77   23.20
  -5  11  -1  258.87   23.20
   5 -11   1  341.27   28.80
  -5  11  -2  329.37   27.90
   5  11   2  360.56   27.90
   5 -11   2  349.27   32.20
   5  11   3 1046.50   77.99
  -5  11  -3 1012.20   78.29
   5 -11   3 1081.19   80.39
  -5 -11  -3 1098.79   77.99
  -5  11  -4   16.70    9.90
   5  11   4   31.10    9.00
   5 -11   4   37.40   15.00
  -5 -11  -4   17.20    9.30
   5  11   5    5.80    9.10
  -5  11  -5    1.40   11.00
   5 -11   5    5.20   16.30
  -5 -11  -5    4.90   10.70
   5  11   6   88.09   11.90
  -5  11  -6   81.19   14.30
   5 -11   6   83.29   20.00
  -5 -11  -6   79.99   14.50
  -5  11  -7    0.60   13.10
   5 -11   7   -1.80   20.20
  -5 -11  -7    4.90   14.70
   5  11   8   -4.40   12.40
  -5  11  -8  -14.70   14.80
  -5 -11  -8   -4.50   17.10
   5 -11   8    7.50   21.20
  -5  11  -9  345.57   33.80
   5 -11   9  356.46   41.50
  -5 -11  -9  348.07   37.90
  -5  11 -10  232.28   28.30
   5  11  10  266.57   28.20
   5 -11  10  260.47   34.80
  -5 -11 -10  274.07   31.80
   5  12 -12   99.49   21.30
   5 -12 -12   75.39   32.80
   5  12 -11  640.24   61.49
   5  12 -11  613.14   52.59
   5 -12 -11  676.73   60.49
   5  12 -10  985.10   76.69
   5  12 -10  898.21   72.29
   5 -12 -10  946.81   76.79
   5  12  -9  126.39   22.10
   5  12  -9  126.39   21.20
   5 -12  -9  116.49   25.20
   5  12  -8   54.69   15.40
   5 -12  -8   28.80   20.90
   5  12  -7   56.79   15.60
   5  12  -7   64.29   15.00
   5 -12  -7   99.09   20.10
   5  12  -6  257.97   25.10
   5  12  -6  255.77   25.40
   5 -12  -6  246.98   30.20
   5  12  -5  616.84   48.90
   5  12  -5  637.14   49.80
   5 -12  -5  661.73   51.29
   5  12  -4 2226.08  163.08
   5  12  -4 2168.88  162.58
   5 -12  -4 2308.37  164.08
   5  12  -3  774.52   54.59
   5  12  -3  741.93   55.39
  -5  12   3  713.93   54.09
   5 -12  -3  702.43   57.19
  -5  12   2  580.34   44.30
   5  12  -2  638.34   45.20
   5 -12  -2  565.44   48.10
  -5  12   1   64.49    9.80
   5  12  -1   92.19   10.60
   5 -12  -1  123.29   17.40
  -5  12   0  129.19   13.30
   5  12   0  150.88   15.10
  -5  12  -1  295.77   26.50
   5  12   1  319.47   26.00
   5 -12   1  361.86   31.30
   5  12   2  103.89   11.20
  -5  12  -2  103.09   12.20
   5 -12   2   86.79   16.80
  -5  12  -3  841.92   64.69
   5  12   3  840.12   64.29
  -5 -12  -3  896.81   64.09
   5 -12   3  890.51   67.49
   5  12   4 1300.67   97.89
  -5  12  -4 1325.17   98.39
  -5 -12  -4 1336.57   97.99
   5 -12   4 1382.16  100.19
  -5  12  -5  380.66   32.50
   5  12   5  380.36   31.10
   5 -12   5  393.56   37.30
  -5 -12  -5  395.86   32.30
   5  12   6   97.99   12.60
  -5  12  -6   84.39   15.00
   5 -12   6   85.39   21.00
  -5 -12  -6   99.29   15.40
  -5  12  -7   85.79   15.70
   5  12   7   80.59   17.40
   5 -12   7   78.69   21.70
  -5 -12  -7   93.39   16.80
   5  12   8   21.40   12.70
  -5  12  -8   18.90   15.20
   5 -12   8   30.20   22.30
  -5 -12  -8   33.20   17.80
  -5  12  -9    8.00   18.00
   5 -12   9   11.90   25.80
  -5 -12  -9    8.90   20.40
   5  12  10  206.58   24.50
  -5  12 -10  195.68   24.90
  -5 -12 -10  212.28   29.10
   5 -12  10  204.58   32.60
   5  13 -12  149.19   23.00
   5  13 -12  163.88   35.60
   5 -13 -12  161.38   34.30
   5  13 -11  190.58   23.80
   5  13 -11  180.98   31.90
   5 -13 -11  173.18   32.80
   5  13 -10   16.20   22.80
   5  13 -10   23.90   17.30
   5 -13 -10   76.39   26.20
   5  13  -9  119.59   18.00
   5  13  -9   84.49   20.50
   5 -13  -9   76.79   25.00
   5  13  -8   62.69   19.40
   5  13  -8   53.49   17.60
   5 -13  -8   65.39   22.10
   5  13  -7   91.29   16.50
   5  13  -7   85.49   16.00
   5 -13  -7  100.89   20.90
   5  13  -6 1358.46  104.49
   5  13  -6 1412.16  104.19
   5 -13  -6 1454.25  106.09
   5  13  -5  207.28   21.40
   5  13  -5  205.48   23.00
   5 -13  -5  207.58   26.10
   5  13  -4  100.39   14.60
   5  13  -4   90.29   11.70
   5 -13  -4   87.49   17.10
  -5  13   3   28.70    7.20
   5  13  -3   19.60    8.30
   5  13  -3   55.89   11.40
   5 -13  -3    0.90   15.50
   5  13  -2  141.99   14.30
  -5  13   2  116.39   11.90
   5 -13  -2  120.49   18.30
  -5  13   1   31.10    8.10
   5  13  -1   54.49    9.40
   5 -13  -1   59.49   15.80
  -5  13   0   -6.90    8.30
   5  13   0   10.00    8.10
   5 -13   0   40.80   15.10
   5  13   1   19.50    8.30
  -5  13  -1    5.30    9.00
   5 -13   1   21.80   15.20
   5  13   2 1403.56  103.09
  -5  13  -2 1398.46  103.19
   5 -13   2 1421.46  105.09
   5  13   3  896.81   68.19
  -5  13  -3  898.91   68.49
   5 -13   3  956.90   71.09
  -5 -13  -3  927.31   67.79
  -5  13  -4  425.16   37.10
   5  13   4  447.96   34.50
  -5 -13  -4  439.86   34.90
   5 -13   4  441.36   43.90
  -5  13  -5  170.38   19.40
   5  13   5  157.78   17.90
  -5 -13  -5  146.99   16.20
   5 -13   5  143.69   21.90
  -5  13  -6  246.58   27.20
   5  13   6  267.47   24.40
   5 -13   6  252.77   35.00
  -5 -13  -6  278.37   27.00
   5  13   7    4.70   11.60
  -5  13  -7    5.00   14.10
  -5 -13  -7  -10.50   15.20
   5 -13   7   14.00   20.60
   5  13   8  228.88   24.40
  -5  13  -8  233.88   24.80
   5 -13   8  228.98   29.80
  -5 -13  -8  230.48   30.90
   5  13   9   94.19   18.90
  -5  13  -9   83.09   18.80
   5 -13   9   86.19   26.60
  -5 -13  -9   97.19   22.30
   5  13  10  263.97   27.30
  -5  13 -10  234.58   27.10
   5 -13  10  217.68   36.00
  -5 -13 -10  253.37   30.90
   5  14 -12   33.10   20.20
   5  14 -12   30.50   32.60
   5 -14 -12   14.20   32.30
   5  14 -11  809.72   74.69
   5  14 -11  827.72   65.29
   5 -14 -11  801.32   73.49
   5  14 -10   16.40   28.00
   5  14 -10   33.30   17.70
   5 -14 -10   11.90   25.90
   5  14  -9  508.45   49.99
   5  14  -9  522.05   45.30
   5 -14  -9  540.65   50.89
   5  14  -8   -0.50   15.80
   5  14  -8    5.80   16.40
   5 -14  -8    6.30   21.50
   5  14  -7  122.99   18.00
   5  14  -7  131.59   17.70
   5 -14  -7  126.29   22.70
   5  14  -6   92.69   14.30
   5  14  -6   91.39   16.00
   5 -14  -6   68.49   23.20
   5  14  -5 2608.74  193.58
   5  14  -5 2595.94  193.58
   5 -14  -5 2744.93  194.38
  -5  14   4    5.70    6.30
   5  14  -4   13.20   12.90
   5  14  -4    0.40    9.60
   5 -14  -4   -4.10   16.40
  -5  14   3 1398.46  103.19
   5  14  -3 1422.36  104.29
   5 -14  -3 1430.06  105.59
  -5  14   2    6.90    7.70
   5  14  -2   23.40    9.30
   5 -14  -2    7.60   16.00
   5  14  -1  384.26   30.20
  -5  14   1  363.36   29.60
   5 -14  -1  380.76   34.80
  -5  14   0  178.48   18.70
   5  14   0  192.58   18.80
   5 -14   0  228.48   25.70
  -5  14  -1    5.90    8.80
   5  14   1    4.20    8.50
   5 -14   1   15.60   15.80
   5  14   2   43.80    9.50
  -5  14  -2   38.80   10.50
   5 -14   2   42.10   16.80
   5  14   3 1644.64  121.59
  -5  14  -3 1637.44  121.99
  -5 -14  -3 1709.43  121.29
   5 -14   3 1660.63  123.69
  -5  14  -4    3.40   12.90
   5  14   4    8.60    9.30
   5 -14   4   20.70   19.00
  -5 -14  -4    5.70    9.60
  -5  14  -5 1317.17   99.09
   5  14   5 1309.97   98.49
   5 -14   5 1358.26  101.49
  -5 -14  -5 1370.26   98.79
  -5  14  -6   18.00   13.60
   5  14   6   28.00   11.00
  -5 -14  -6   23.40   13.70
   5 -14   6   16.40   20.50
   5  14   7   13.50   11.80
  -5  14  -7    3.70   14.30
   5 -14   7   -1.30   21.80
  -5 -14  -7   11.20   15.60
  -5  14  -8   68.69   17.40
   5  14   8   83.89   16.80
  -5 -14  -8   84.09   19.60
   5 -14   8   94.99   25.80
  -5  14  -9  130.59   21.30
   5  14   9  132.99   21.30
   5 -14   9  139.49   29.90
  -5 -14  -9  154.98   24.10
   5  14  10   10.10   19.80
   5 -14  10   -2.40   32.50
  -5 -14 -10   -1.00   24.00
   5  15 -11   35.60   20.20
   5 -15 -11   32.40   31.00
   5  15 -10   22.40   28.70
   5  15 -10   46.30   19.50
   5 -15 -10   15.30   27.60
   5  15  -9   87.69   19.40
   5  15  -9   75.39   21.20
   5 -15  -9   95.49   25.60
   5  15  -8   77.09   18.60
   5  15  -8   58.49   17.90
   5 -15  -8   53.39   22.50
   5  15  -7    9.60   21.20
   5  15  -7   10.60   14.90
   5 -15  -7   14.50   20.70
   5  15  -6 1107.29   82.29
   5  15  -6 1083.99   82.59
   5 -15  -6 1103.59   91.49
   5  15  -5   39.70   14.50
   5  15  -5   19.90   11.80
   5 -15  -5   30.40   18.00
   5  15  -4  130.29   17.00
  -5  15   4  140.79   13.30
   5  15  -4  128.99   16.90
   5 -15  -4  113.79   19.70
  -5  15   3  140.69   14.80
   5  15  -3  184.88   19.30
   5 -15  -3  140.19   20.40
  -5  15   2   73.49    9.90
   5  15  -2   75.19   11.90
   5 -15  -2   49.60   17.70
   5  15  -1  879.51   65.59
  -5  15   1  877.51   65.09
   5 -15  -1  882.51   68.19
  -5  15   0   -0.50    9.10
   5  15   0    6.70    8.90
   5 -15   0   29.00   17.00
   5  15   1   52.69   10.10
  -5  15  -1   34.90   10.20
   5 -15   1   45.30   17.10
  -5  15  -2 1353.06  100.39
   5  15   2 1410.16  100.19
   5 -15   2 1327.97  102.39
   5  15   3  117.09   12.40
  -5  15  -3  110.79   14.10
   5 -15   3   90.09   19.00
  -5 -15  -3   94.49   11.20
  -5  15  -4   92.59   14.10
   5  15   4   91.89   12.40
   5 -15   4  108.29   20.00
  -5 -15  -4   88.69   12.30
  -5  15  -5   53.99   13.70
   5  15   5   46.10   11.10
  -5 -15  -5   45.20   12.20
   5 -15   5   39.10   20.00
  -5  15  -6  228.18   25.30
   5  15   6  211.58   25.20
  -5 -15  -6  235.18   26.10
   5 -15   6  233.28   27.60
  -5  15  -7   46.30   16.40
   5  15   7   49.00   12.80
  -5 -15  -7   53.69   17.40
   5 -15   7   67.49   23.70
  -5  15  -8  248.18   25.60
   5  15   8  231.48   26.60
  -5 -15  -8  234.48   31.50
   5 -15   8  242.28   32.30
   5  15   9   -5.00   17.10
  -5  15  -9   -2.50   17.90
   5 -15   9  -12.90   28.10
  -5 -15  -9    8.90   21.40
   5  16 -11  306.47   36.90
   5 -16 -11  312.07   39.80
   5  16 -10  311.37   35.60
   5  16 -10  319.27   35.00
   5 -16 -10  274.27   37.80
   5  16  -9   30.80   18.60
   5  16  -9   36.60   20.00
   5 -16  -9   31.70   25.20
   5  16  -8   97.79   21.00
   5  16  -8  142.09   20.50
   5 -16  -8  159.18   26.10
   5  16  -7  401.76   36.30
   5  16  -7  388.36   36.40
   5 -16  -7  402.16   40.20
   5  16  -6  582.54   46.90
   5 -16  -6  602.84   50.29
   5  16  -5  333.47   30.90
   5  16  -5  347.97   31.90
   5 -16  -5  367.06   36.40
  -5  16   4  597.14   44.70
   5  16  -4  593.94   47.60
   5 -16  -4  600.44   49.40
   5  16  -3 1637.64  125.29
  -5  16   3 1727.83  124.29
  -5 -16   3 1756.72  124.59
   5 -16  -3 1694.43  126.79
   5  16  -2   87.79   13.00
  -5  16   2   94.09   11.00
   5 -16  -2   62.39   18.80
   5  16  -1  167.28   17.60
  -5  16   1  139.29   15.80
   5 -16  -1  153.28   21.10
   5  16   0 2203.98  161.08
  -5  16   0 2229.68  160.98
   5 -16   0 2194.68  162.68
  -5  16  -1  160.98   18.30
   5  16   1  181.88   18.20
   5 -16   1  177.18   22.10
  -5  16  -2  263.47   23.30
   5  16   2  243.28   22.50
   5 -16   2  234.68   29.80
  -5  16  -3  715.93   57.59
   5  16   3  740.73   55.79
  -5 -16  -3  774.52   55.09
   5 -16   3  698.23   69.89
  -5  16  -4  676.73   52.39
   5  16   4  667.83   52.29
   5 -16   4  694.33   56.69
  -5 -16  -4  703.83   51.99
  -5  16  -5  484.15   41.30
   5  16   5  519.25   40.20
   5 -16   5  514.55   46.20
  -5 -16  -5  505.15   40.70
  -5  16  -6  353.26   31.80
  -5 -16  -6  319.87   32.10
   5 -16   6  352.06   38.30
   5  16   7  105.59   14.80
  -5  16  -7   95.39   17.90
   5 -16   7  109.39   25.30
  -5 -16  -7  107.99   18.80
   5  16   8  295.57   30.80
  -5  16  -8  333.17   32.70
  -5 -16  -8  331.17   35.40
   5 -16   8  302.77   36.70
   5  16   9   -5.80   17.90
  -5  16  -9   15.20   18.70
  -5 -16  -9   -0.10   21.60
   5 -16   9    1.20   29.40
   5 -17 -11   19.30   31.70
   5  17 -10  225.38   27.10
   5  17 -10  206.68   31.50
   5 -17 -10  241.48   35.20
   5  17  -9   32.20   19.00
   5  17  -9   25.80   25.30
   5 -17  -9   36.00   26.60
   5  17  -8   60.19   20.10
   5  17  -8   95.59   19.50
   5 -17  -8   82.19   24.70
   5  17  -7  163.68   21.30
   5  17  -7  133.89   21.40
   5 -17  -7  138.19   25.90
   5  17  -6   92.69   16.50
   5 -17  -6  102.79   21.90
   5  17  -5  107.89   20.20
   5 -17  -5  108.69   23.20
   5  17  -4  312.37   30.80
  -5  17   4  358.96   26.60
   5 -17  -4  285.97   34.60
  -5  17   3  152.78   16.00
   5  17  -3  170.08   17.80
  -5 -17   3  151.78   18.20
   5 -17  -3  140.09   21.30
  -5  17   2  927.51   67.39
   5  17  -2  921.31   68.29
   5 -17  -2  869.01   70.99
   5  17  -1  392.46   33.30
  -5  17   1  438.06   32.50
   5 -17  -1  371.16   37.80
   5  17   0   14.10   10.00
  -5  17   0    4.10   10.70
   5 -17   0    7.70   18.30
   5  17   1    8.40    9.60
  -5  17  -1   -2.40   10.80
   5 -17   1    5.90   17.80
  -5  17  -2  655.73   49.30
   5  17   2  631.34   48.70
   5 -17   2  625.34   54.19
   5  17   3  316.77   27.30
  -5  17  -3  299.77   28.60
   5 -17   3  296.57   35.50
  -5 -17  -3  315.97   25.20
  -5  17  -4  106.19   15.90
   5  17   4  108.69   13.60
  -5 -17  -4  106.19   13.10
   5 -17   4   87.09   21.90
  -5  17  -5   33.30   14.60
   5  17   5   34.40   11.90
   5 -17   5   28.00   20.90
  -5 -17  -5   45.30   14.40
   5  17   6  265.87   27.10
  -5  17  -6  285.97   29.30
   5 -17   6  295.47   36.00
  -5 -17  -6  291.77   29.30
  -5  17  -7  105.39   19.10
   5  17   7  121.19   16.50
   5 -17   7  125.29   26.00
  -5 -17  -7  117.59   19.40
   5  17   8   -0.40   15.20
  -5  17  -8   13.30   18.30
  -5 -17  -8  -15.90   19.30
   5 -17   8   -1.00   26.40
  -5  17  -9   12.90   20.20
   5  17   9   12.80   18.60
  -5 -17  -9    1.00   21.90
   5 -17   9   10.10   29.60
   5  18 -11   50.49   23.20
   5 -18 -11   31.00   33.60
   5  18 -10   63.49   22.40
   5  18 -10   51.09   24.00
   5 -18 -10   47.40   31.00
   5  18  -9  375.26   40.70
   5  18  -9  347.97   38.50
   5 -18  -9  336.67   39.20
   5  18  -8  230.68   26.60
   5  18  -8  242.98   28.10
   5 -18  -8  229.78   32.00
   5  18  -7  955.90   75.99
   5  18  -7 1015.30   77.29
   5 -18  -7  982.60   78.09
   5  18  -6   71.79   17.70
   5 -18  -6   91.99   22.90
  -5  18   5  180.68   17.40
   5  18  -5  197.38   21.70
   5 -18  -5  219.38   29.90
   5  18  -4  143.59   22.20
  -5  18   4  196.78   17.60
  -5 -18   4  180.98   21.50
   5 -18  -4  173.08   23.60
   5  18  -3  328.37   30.40
  -5  18   3  371.66   28.50
   5 -18  -3  309.47   34.50
  -5 -18   3  370.26   29.80
   5  18  -2  350.46   30.10
  -5  18   2  357.06   29.10
   5 -18  -2  315.57   34.20
  -5  18   1 1383.96   97.99
   5  18  -1 1290.17   98.49
   5 -18  -1 1325.57  100.99
   5  18   0  331.57   28.80
  -5  18   0  357.36   29.20
   5 -18   0  321.67   35.20
   5  18   1  883.11   67.09
  -5  18  -1  903.31   67.29
   5 -18   1  907.31   70.69
  -5  18  -2  492.05   39.40
   5  18   2  498.95   38.40
   5 -18   2  440.06   55.49
  -5  18  -3   65.59   14.10
   5  18   3   74.69   12.50
   5 -18   3   57.79   20.50
  -5 -18  -3   68.09   10.00
   5  18   4  203.88   20.70
  -5  18  -4  176.88   19.70
  -5 -18  -4  169.18   19.40
   5 -18   4  158.58   25.30
  -5  18  -5   24.70   15.00
  -5 -18  -5   11.60   12.80
   5 -18   5   14.40   21.50
   5  18   6  279.47   29.00
  -5  18  -6  305.97   31.00
   5 -18   6  324.77   41.20
  -5 -18  -6  316.37   30.70
  -5  18  -7  426.06   39.80
   5  18   7  408.56   35.80
  -5 -18  -7  409.46   38.90
   5 -18   7  399.46   45.00
  -5  18  -8  144.69   21.80
   5  18   8  114.59   19.10
  -5 -18  -8  109.39   22.00
   5 -18   8  118.89   30.40
  -5  18  -9  348.47   38.20
   5  18   9  324.67   40.50
  -5 -18  -9  408.46   41.80
   5 -18   9  354.66   49.10
   5  19 -11   30.70   22.50
   5 -19 -11   11.50   33.00
   5  19 -10  272.97   30.40
   5  19 -10  244.48   34.50
   5 -19 -10  248.98   37.70
   5  19  -9   43.20   21.90
   5  19  -9   20.40   26.80
   5 -19  -9   27.20   27.90
   5  19  -8  361.56   36.90
   5 -19  -8  349.07   41.40
   5  19  -7   77.29   19.80
   5 -19  -7   63.69   24.10
   5  19  -6   18.50   17.10
   5 -19  -6    2.00   21.80
  -5  19   5    9.00    8.80
   5  19  -5   -5.30   15.90
  -5 -19   5    8.90   15.50
   5 -19  -5   -7.10   19.60
  -5  19   4  267.97   22.80
   5  19  -4  229.18   27.60
  -5 -19   4  271.47   26.30
   5 -19  -4  246.58   30.80
   5  19  -3  154.68   22.40
  -5  19   3  164.58   17.90
  -5 -19   3  152.88   19.30
   5 -19  -3  138.29   22.70
   5  19  -2 1619.84  120.89
  -5  19   2 1705.93  120.19
   5 -19  -2 1595.14  122.39
  -5  19   1   55.69   11.50
   5  19  -1   41.70   12.90
   5 -19  -1   50.49   19.60
   5  19   0  111.39   14.20
  -5  19   0  106.29   14.40
   5 -19   0   98.79   22.10
   5  19   1  168.38   18.80
  -5  19  -1  149.69   17.30
   5 -19   1  150.68   23.50
   5  19   2  149.69   15.90
   5 -19   2  136.89   23.80
   5  19   3   18.00   11.10
  -5  19  -3   20.70   13.90
  -5 -19  -3   21.50    9.50
   5 -19   3    8.10   21.10
   5  19   4  117.29   16.90
  -5  19  -4   92.79   17.00
   5 -19   4   86.19   24.40
  -5 -19  -4  112.59   13.80
  -5  19  -5   10.70   15.60
   5  19   5   24.40   12.60
   5 -19   5   20.80   22.30
  -5 -19  -5   -5.80   12.70
   5  19   6  464.25   40.00
  -5  19  -6  468.65   41.70
   5 -19   6  515.95   48.40
  -5 -19  -6  477.15   41.20
  -5  19  -7   34.90   18.40
   5  19   7    4.10   14.70
   5 -19   7   27.10   27.00
  -5 -19  -7  -21.40   17.80
   5  19   8   49.20   18.20
  -5  19  -8   55.39   20.00
   5 -19   8   68.59   29.60
  -5 -19  -8   56.19   21.30
   5  19   9   -3.40   20.20
  -5  19  -9   33.50   21.60
   5 -19   9   16.20   32.60
  -5 -19  -9   14.10   23.50
   5  20 -10  128.59   25.10
   5 -20 -10  101.79   32.50
   5  20  -9  278.37   31.80
   5 -20  -9  307.17   37.90
   5  20  -8   51.89   21.00
   5 -20  -8   38.10   26.70
   5  20  -7 1629.64  121.19
   5 -20  -7 1599.04  122.99
   5  20  -6  150.68   21.70
   5 -20  -6  132.29   26.50
  -5 -20   6  147.69   22.50
  -5  20   5  113.99   12.70
   5  20  -5  102.39   19.50
  -5 -20   5  108.29   18.20
   5 -20  -5  107.59   22.90
  -5  20   4  145.89   17.30
   5  20  -4  136.99   19.40
  -5 -20   4  141.89   18.30
  -5  20   3   25.20   10.80
   5  20  -3   23.20   15.20
   5 -20  -3    5.30   19.50
  -5 -20   3   12.70   13.40
  -5  20   2   21.90   11.30
   5 -20  -2    3.60   19.70
   5  20  -1  665.63   53.59
  -5  20   1  724.13   52.49
   5 -20  -1  655.53   57.39
   5  20   0  271.97   26.50
  -5  20   0  272.57   26.60
   5 -20   0  314.77   35.30
  -5  20  -1 1393.06   95.59
   5  20   1 1295.47   95.09
   5 -20   1 1123.99  102.39
  -5  20  -2   15.00   14.00
   5  20   2   36.50   12.00
   5 -20   2   54.09   21.10
  -5  20  -3  -10.10   14.40
   5 -20   3   34.40   22.40
  -5 -20  -3  -14.20    9.10
   5  20   4  167.48   18.50
  -5  20  -4  175.28   20.70
  -5 -20  -4  158.78   19.30
[truncated: 400,881 more chars]
